# Supplementary material for: Changes in the genetic requirements for microbial interactions with increasing community complexity
Source: eLife journal article supplement (doi:10.7554/elife.37072), 2018-09-13

| Keio strain | Gene name | RB-TNSeq fitness | Experimental Fitness value | SEM of Experimental Fitness value | z-score |
|-------------|-----------|------------------|----------------------------|-----------------------------------|---------|
| JW3140      | argG      | -0.43            | -1.38                      | 0.06                              | 23.90   |
| JW0391      | brnQ      | -2.42            | -0.45                      | 0.37                              | 1.21    |
| JW3789      | corA      | -2.27            | -4.37                      | 0.30                              | 14.58   |
| JW2407      | cysK      | -1.38            | -1.72                      | 0.91                              | 1.90    |
| JW2974      | exbB      | -1.42            | -1.48                      | 0.05                              | 27.25   |
| JW2973      | exbD      | -1.46            | -3.25                      | 0.08                              | 43.16   |
| JW5086      | fepA      | -0.95            | -1.97                      | 0.46                              | 4.28    |
| JW0584      | fepB      | -1.11            | -1.60                      | 0.13                              | 12.42   |
| JW0580      | fepC      | -0.80            | -3.11                      | 0.74                              | 4.21    |
| JW0582      | fepD      | -1.02            | -3.13                      | 0.64                              | 4.85    |
| JW0581      | fepG      | -0.76            | -2.07                      | 1.02                              | 2.03    |
| JW0576      | fes       | -1.91            | -1.98                      | 0.08                              | 24.75   |
| JW0742      | galE      | -1.53            | -3.69                      | 0.41                              | 8.89    |
| JW2464      | gcvR      | -1.89            | -3.56                      | 0.42                              | 8.54    |
| JW3377      | nfuA      | -2.70            | -4.09                      | 0.29                              | 14.07   |
| JW0018      | nhaA      | -4.09            | -1.82                      | 0.40                              | 4.56    |
| JW3627      | recG      | -2.10            | -0.63                      | 0.28                              | 2.23    |
| JW2755      | relA      | -0.86            | -2.49                      | 0.19                              | 13.39   |
| JW3624      | rpoZ      | -2.23            | -1.17                      | 0.26                              | 4.43    |
| JW2880      | serA      | -1.54            | -0.24                      | 0.30                              | 0.79    |
| JW4351      | serB      | -2.41            | -1.04                      | 0.18                              | 5.81    |
| JW0890      | serC      | -1.43            | -1.01                      | 0.15                              | 6.85    |
| JW5576      | trkH      | -0.89            | -0.57                      | 0.10                              | 5.49    |
| JW5856      | trxA      | -2.21            | -0.75                      | 0.54                              | 1.39    |
| JW3434      | zntA      | -1.50            | -0.64                      | 0.19                              | 3.37    |

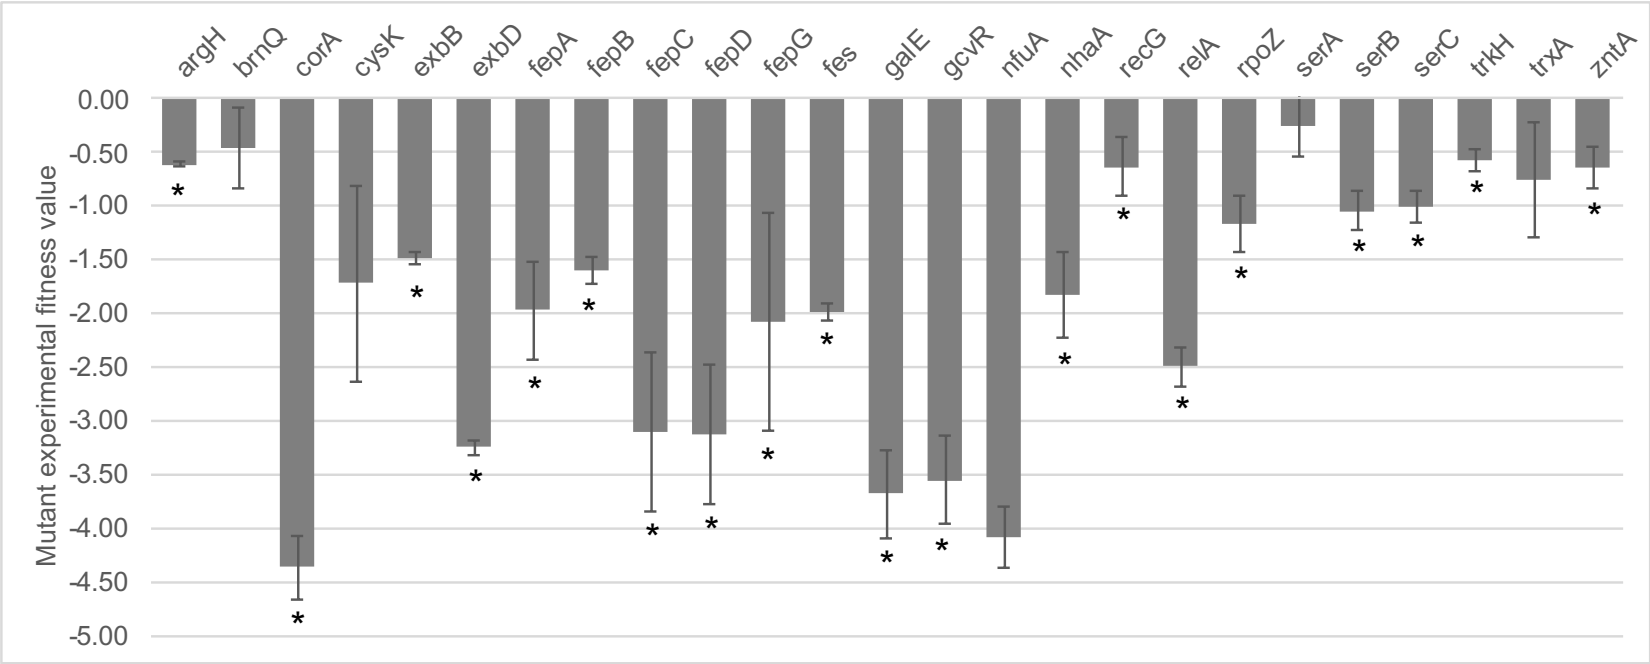

Supplement: supp [file elife-37072-supp-v1.zip]
