# Supplementary material for: Changes in the genetic requirements for microbial interactions with increasing community complexity
Source: eLife journal article supplement (doi:10.7554/elife.37072), 2018-09-13
Supplement: supp [file elife-37072-supp-v1.zip]

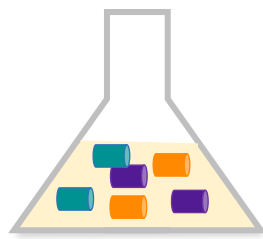

RB-TnSeq mutant library is grown in LB  
(pool of 152,018 insertion mutants)

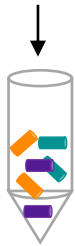

An aliquot of these cells is collected and  
DNA is extracted (T0 condition)

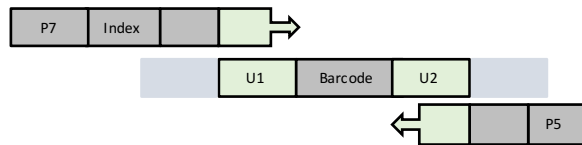

Unique barcodes are amplified with primers annealing to  
common U1 and U2 regions. These primers also add on  
Illumina adapter sequences and a unique index to facilitate  
pooled sequencing

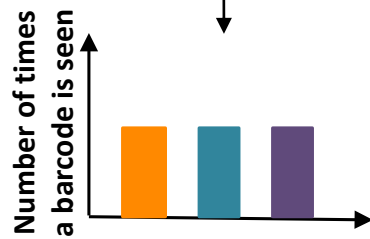

Following amplicon sequencing, barcodes  
are counted

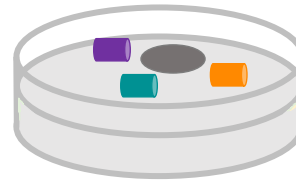

RB-TnSeq mutant library is grown in selective  
condition (alone or in the presence of other species  
(pairwise or community conditions))

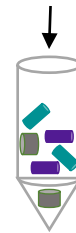

Cells are harvested from plate  
and DNA is extracted

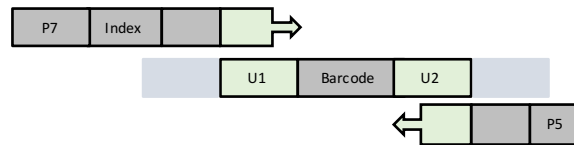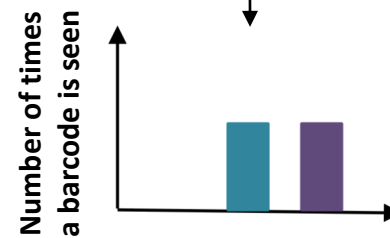

Following amplicon sequencing, barcodes  
are counted

$$\text{Insertion mutant fitness} = f_s = \log_2(n_{\text{after}} + \sqrt{\varphi}) - \log_2(n_0 + \sqrt{\frac{1}{\varphi}})$$

$$\text{Unnormalized gene fitness} = f_u = \frac{\sum_i (w_i * f_s(i))}{\sum_i w_i}$$

$$\text{Normalized gene fitness: } f_{g1} = f_u - M \text{ then } f_g = f_{g1} - M_d$$

$$\text{t-score} = \frac{f_g}{\sqrt{\sigma^2 + \max(V_n, V_e)}}$$

$n_{\text{after}}$  = abundance after growth

$n_0$  = abundance in T0

$\varphi$  = pseudocount (avoid noise in low to null counts)

$w_i$  = strain weight (inverse of the variance)

$M$  = smoothed median of the unnormalized fitness

$M_d$  = Mode of the previously normalized gene fitness

$\sigma$  = constant to represent uncertainty in the normalization  
of small fitness values

$V_n$  = naïve gene fitness variance (based on counts)

$V_e$  = estimated gene fitness variance (based on insertion  
mutant fitness)
