# Supplementary material for: Changes in the genetic requirements for microbial interactions with increasing community complexity
Source: eLife journal article supplement (doi:10.7554/elife.37072), 2018-09-13
Supplement: supp [file elife-37072-supp-v1.zip]

## *E. coli* RB-TnSeq experiments

| Sample                          | gMed  | cor12      | mad12      | adjcor     | gccor      | quality-test |
|---------------------------------|-------|------------|------------|------------|------------|--------------|
| Alone-Day1                      | 255   | 0.1723879  | 0.26568155 | 0.09779835 | 0.03594243 | TRUE         |
| with <i>H. alvei</i> -Day1      | 784.5 | 0.16093804 | 0.22950086 | 0.01344365 | 0.10109925 | TRUE         |
| with <i>P. camemberti</i> -Day1 | 694   | 0.15246077 | 0.24130197 | -0.0288577 | 0.0781625  | TRUE         |
| with <i>G. candidum</i> -Day 1  | 615   | 0.21262254 | 0.22411822 | 0.05631649 | 0.08865255 | TRUE         |
| with Community -Day1            | 705.5 | 0.16833782 | 0.22670031 | 7.35E-05   | 0.10804874 | TRUE         |
| Alone-Day2                      | 210   | 0.16670639 | 0.2659591  | 0.03893953 | 0.01551325 | TRUE         |
| with <i>H. alvei</i> -Day2      | 643   | 0.20284412 | 0.22711697 | 0.06134974 | 0.08684969 | TRUE         |
| with <i>P. camemberti</i> -Day2 | 850.5 | 0.19586525 | 0.21875375 | -0.0188038 | 0.06885679 | TRUE         |
| with <i>G. candidum</i> -Day 2  | 486.5 | 0.1828237  | 0.23211583 | -0.0169854 | 0.08628507 | TRUE         |
| with Community -Day2            | 795   | 0.18553046 | 0.22467727 | -0.0046128 | 0.09393122 | TRUE         |
| Alone-Day3                      | 277   | 0.16459242 | 0.26477063 | 0.04099767 | 0.03896542 | TRUE         |
| with <i>H. alvei</i> -Day3      | 839.5 | 0.24571319 | 0.22925674 | 0.05041216 | 0.0668381  | TRUE         |
| with <i>P. camemberti</i> -Day3 | 907   | 0.18509847 | 0.22954482 | -0.0146138 | 0.06294131 | TRUE         |
| with <i>G. candidum</i> -Day 3  | 1013  | 0.18533261 | 0.22785847 | -0.044744  | 0.08140464 | TRUE         |
| with Community -Day3            | 814.5 | 0.1677215  | 0.23602283 | -0.0172009 | 0.07646943 | TRUE         |

## *P. psychrophyla* JB418 RB-TnSeq experiments

| Sample                          | gMed  | cor12      | mad12      | adjcor     | gccor      | quality-test |
|---------------------------------|-------|------------|------------|------------|------------|--------------|
| Alone-Day1                      | 99    | 0.17009447 | 0.36313709 | 0.08167588 | -0.0248871 | TRUE         |
| with <i>H. alvei</i> -Day1      | 315.5 | 0.25863873 | 0.26542377 | 0.13810483 | 0.00523254 | TRUE         |
| with <i>P. camemberti</i> -Day1 | 375   | 0.23178696 | 0.28072116 | 0.09827563 | 0.01019754 | TRUE         |
| with <i>G. candidum</i> -Day 1  | 337   | 0.28177362 | 0.265721   | 0.16133524 | 0.00608864 | TRUE         |
| with Community -Day1            | 316   | 0.24654972 | 0.2770101  | 0.13833535 | 0.0128327  | TRUE         |
| Alone-Day2                      | 113   | 0.1955332  | 0.40382365 | 0.03113561 | -0.0225443 | TRUE         |
| with <i>H. alvei</i> -Day2      | 385.5 | 0.23498414 | 0.27329519 | 0.06481841 | 0.00739981 | TRUE         |
| with <i>P. camemberti</i> -Day2 | 312   | 0.22238257 | 0.26684366 | 0.02676088 | -0.002133  | TRUE         |
| with <i>G. candidum</i> -Day 2  | 301   | 0.21420476 | 0.27356635 | 0.0526742  | 0.00032401 | TRUE         |
| with Community -Day2            | 285   | 0.17817419 | 0.28575851 | 0.02095246 | 0.01214387 | TRUE         |
| Alone-Day3                      | 87    | 0.15654554 | 0.35633263 | 0.03285248 | -0.0118369 | TRUE         |
| with <i>H. alvei</i> -Day3      | 403   | 0.20618922 | 0.27800945 | 0.0131201  | 0.00328971 | TRUE         |
| with <i>P. camemberti</i> -Day3 | 310   | 0.20855776 | 0.27447156 | 0.02202981 | -0.0002405 | TRUE         |
| with <i>G. candidum</i> -Day 3  | 403   | 0.19856088 | 0.27713564 | 0.03743198 | 0.00727052 | TRUE         |
| with Community -Day3            | 323   | 0.20256391 | 0.26672818 | 0.01716005 | 0.00867084 | TRUE         |
