# Supplementary material for: Changes in the genetic requirements for microbial interactions with increasing community complexity
Source: eLife journal article supplement (doi:10.7554/elife.37072), 2018-09-13

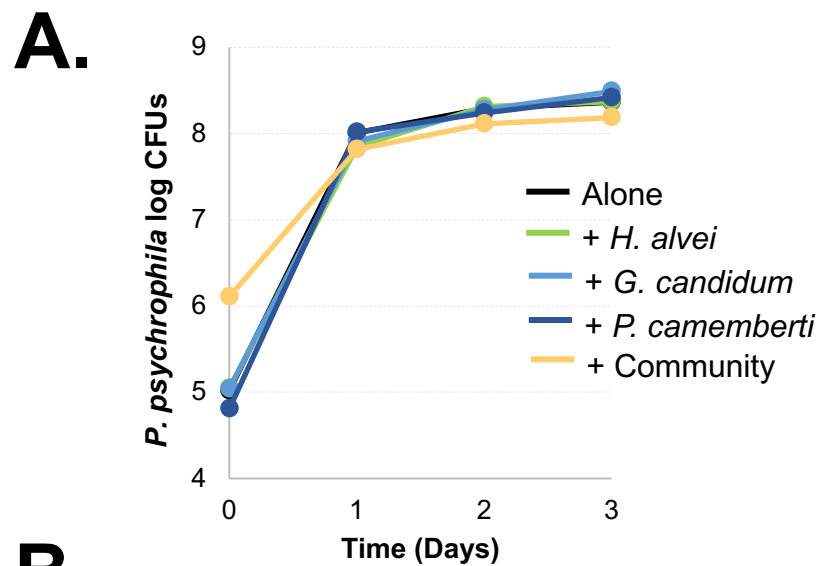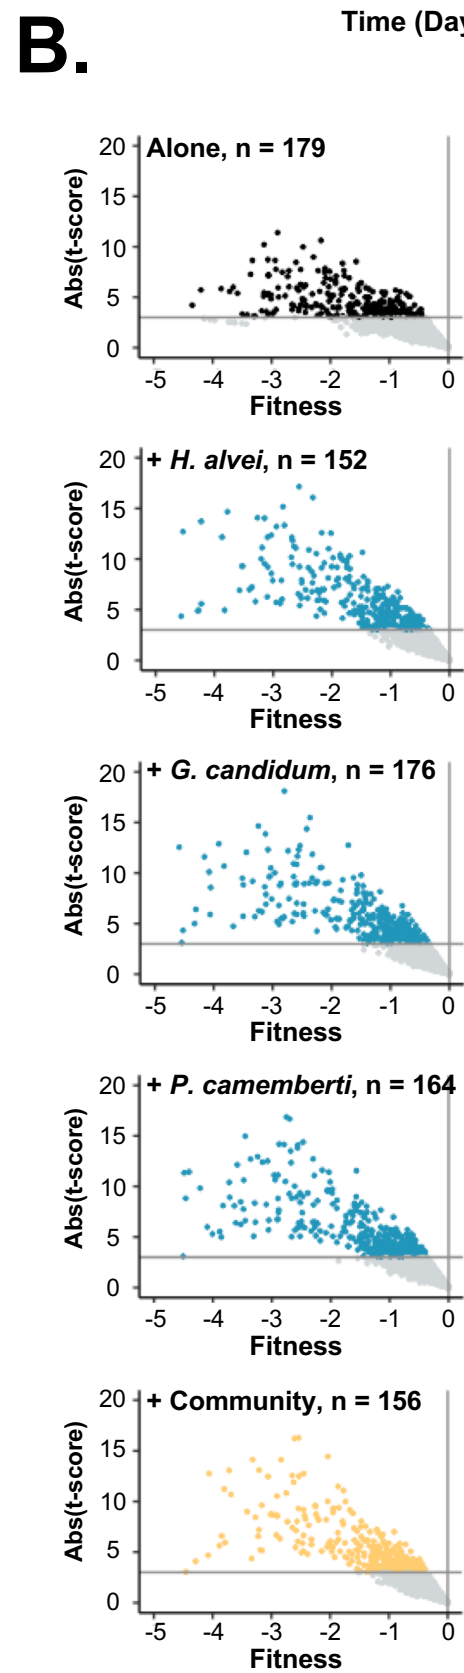

Negative fitness values above the t-score threshold  

 Fitness values below the t-score threshold

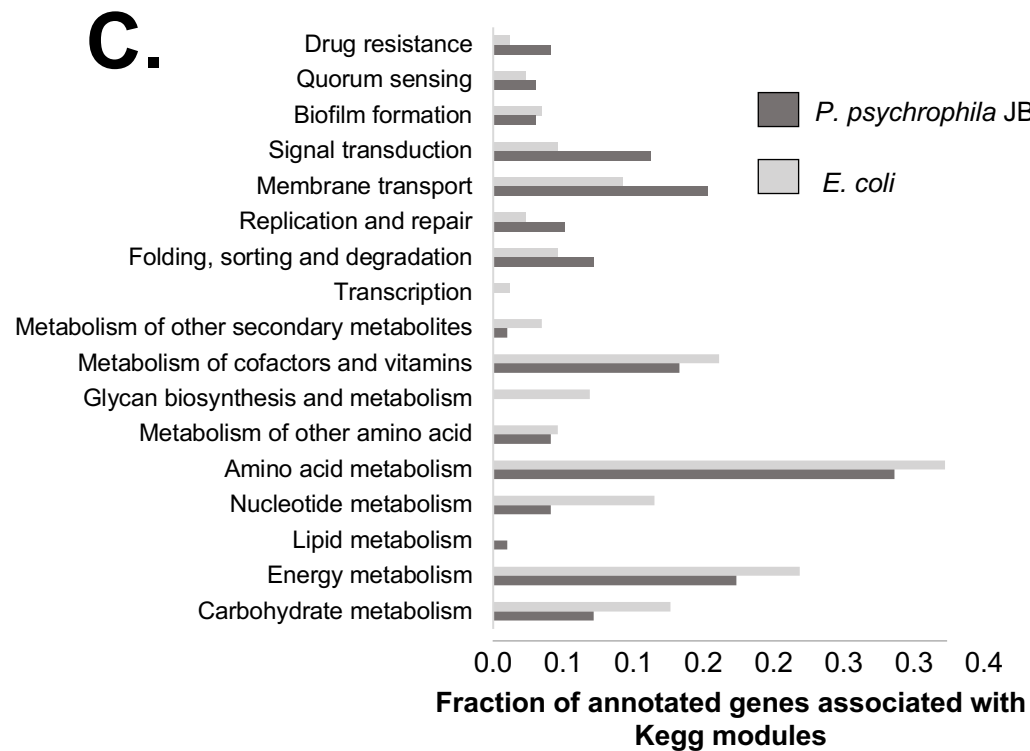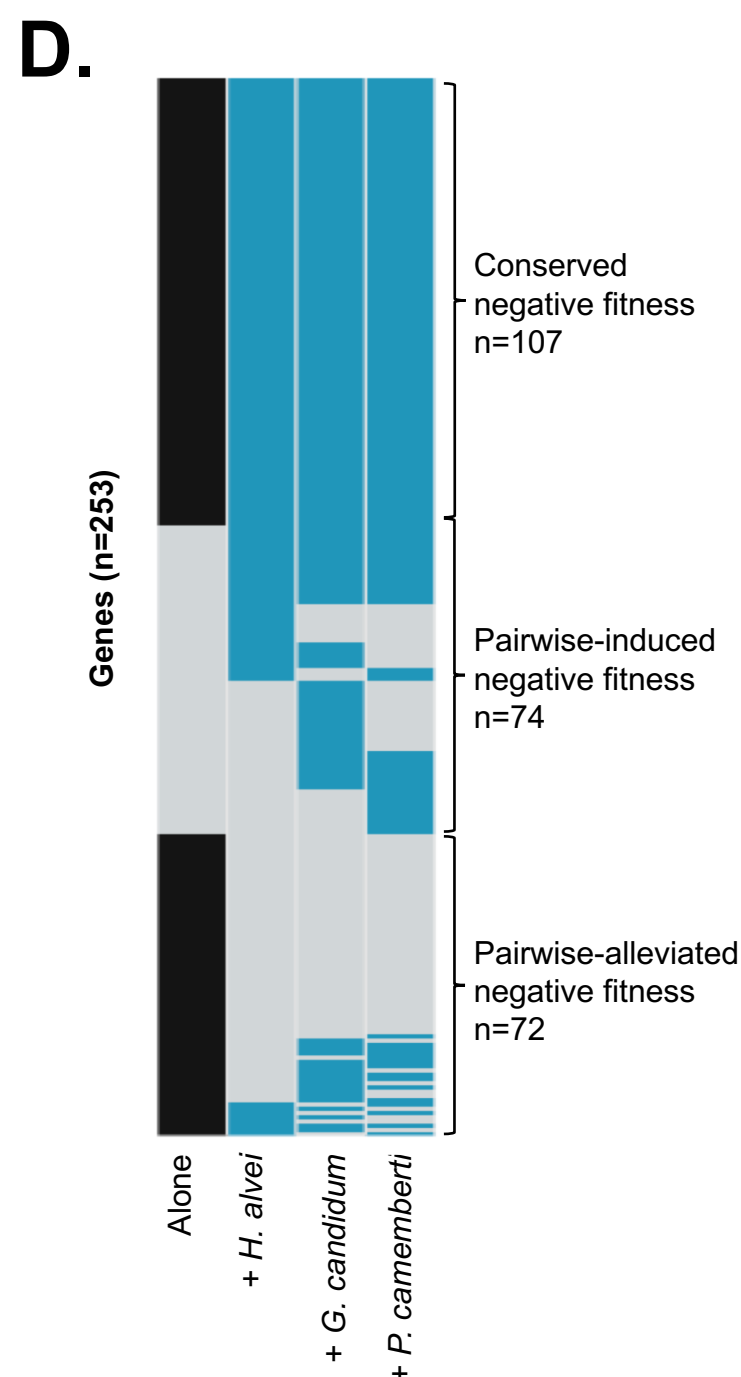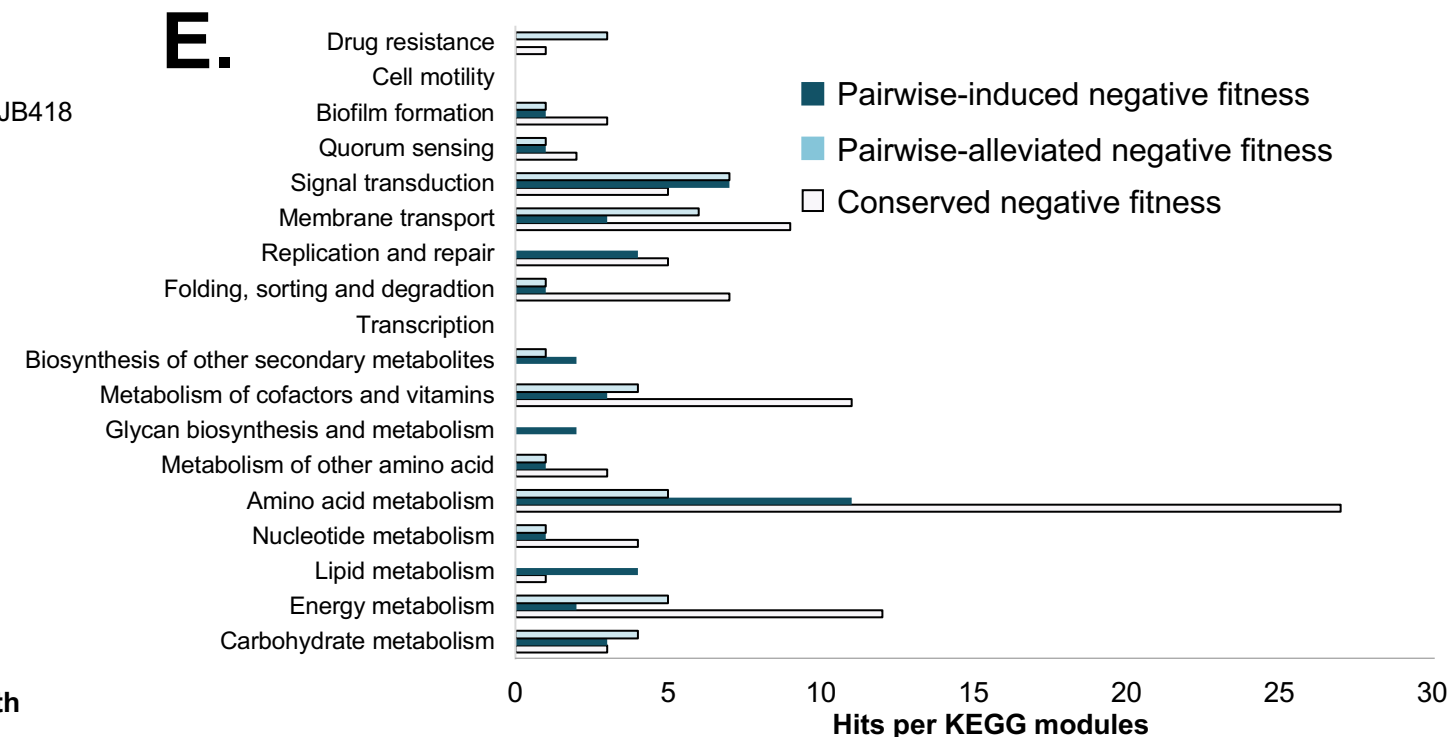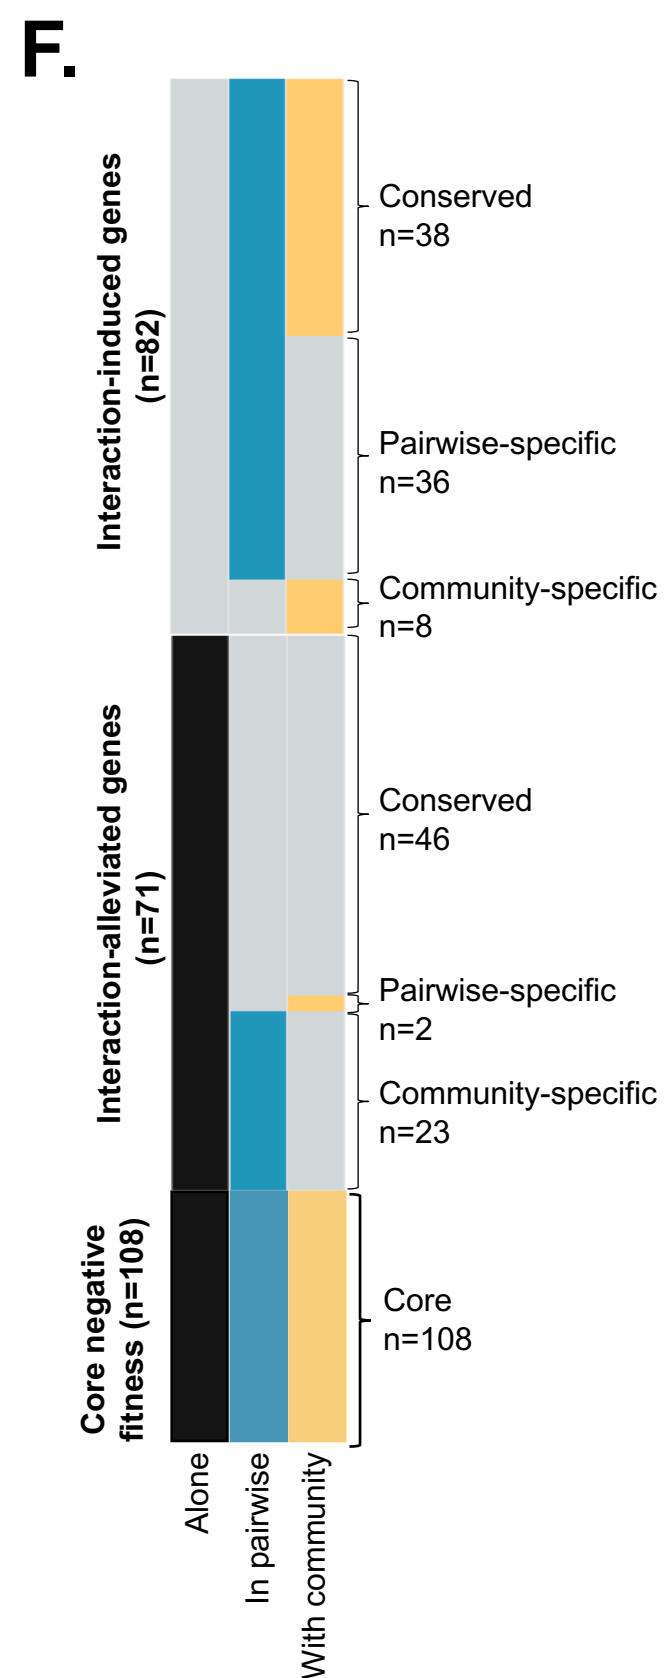

Supplement: supp [file elife-37072-supp-v1.zip]
