# Supplementary material for: Changes in the genetic requirements for microbial interactions with increasing community complexity
Source: eLife journal article supplement (doi:10.7554/elife.37072), 2018-09-13

|                                                  |          |
|--------------------------------------------------|----------|
| Genome size                                      | 6.07 Mbp |
| Number of protein-coding genes (PCG)             | 5788     |
| Number of mapped barcodes                        | 272329   |
| Number of mutants with central insertions in PCG | 143491   |
| Median of barcode per gene                       | 18       |
| Number of PCG with central insertion             | 4811     |

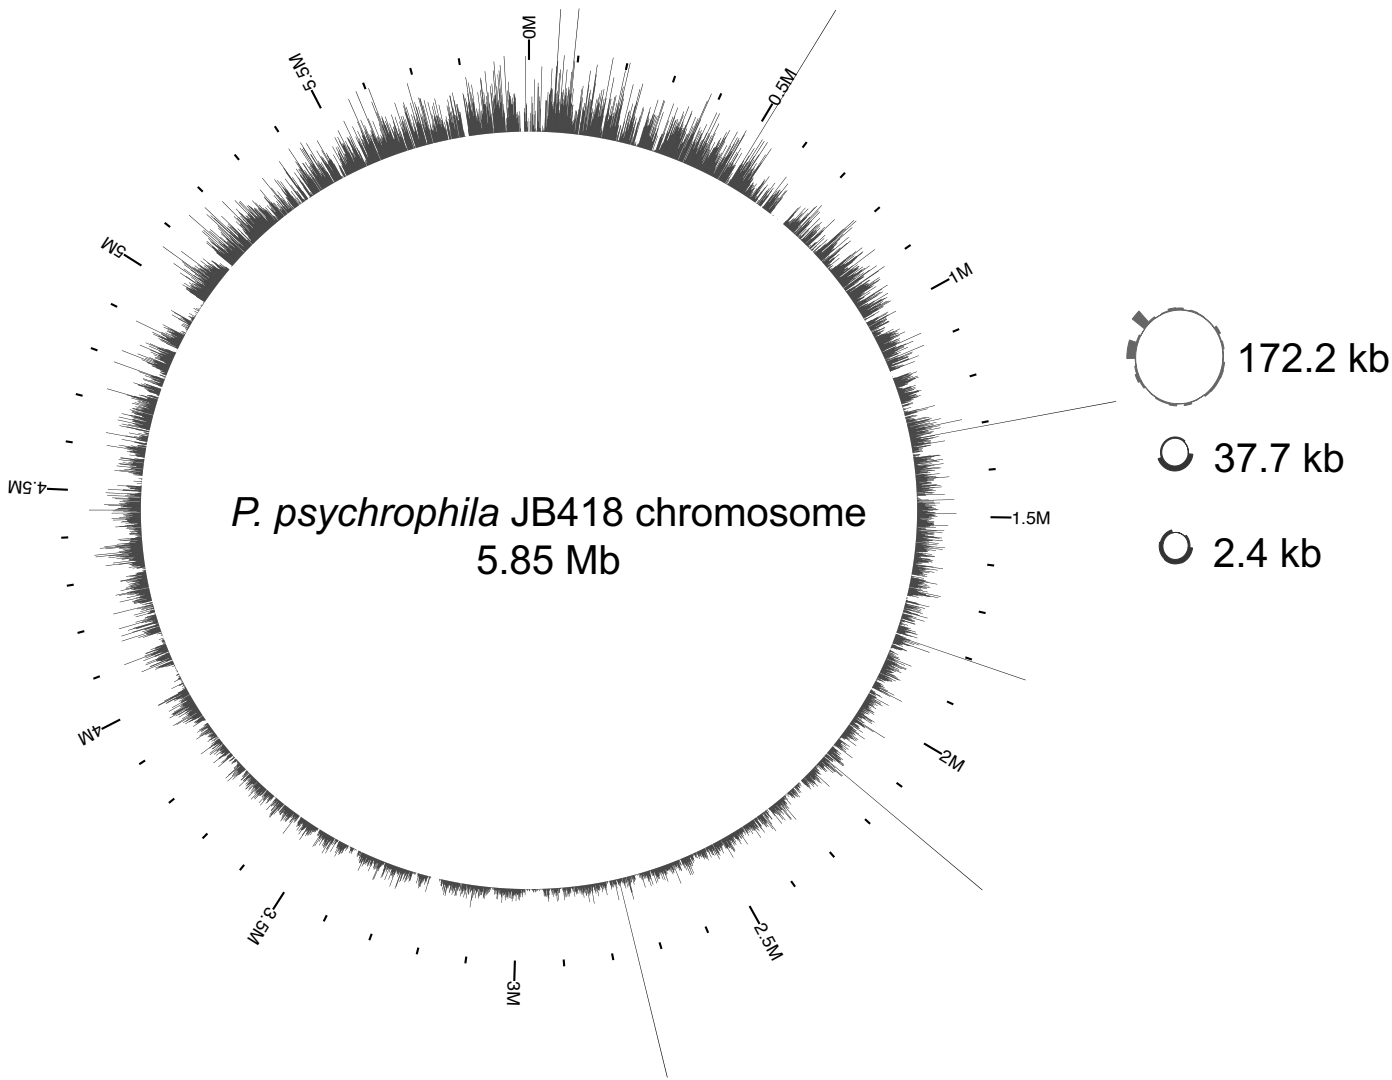

Supplement: supp [file elife-37072-supp-v1.zip]
