# Supplementary material for: Changes in the genetic requirements for microbial interactions with increasing community complexity
Source: eLife journal article supplement (doi:10.7554/elife.37072), 2018-09-13
Supplement: supp [file elife-37072-supp-v1.zip]

Archive with 17 entries (17 files):
- elife_poa_e37072_Figure_4_figure_supplement_1.pdf
- elife_poa_e37072_Figure_1_figure_supplement_1.pdf
- elife_poa_e37072_Figure_1_figure_supplement_4_source_data_1.xlsx
- elife_poa_e37072_Supplementary_File_1.xlsx
- elife_poa_e37072_Figure_2_source_data_1.xlsx
- elife_poa_e37072_Figure_1_figure_supplement_3.pdf
- elife_poa_e37072_Figure_1_figure_supplement_5.pdf
- elife_poa_e37072_Figure_1_source_data_1.xlsx
- elife_poa_e37072_Figure_4_source_data_1.xlsx
- elife_poa_e37072_Figure_1_figure_supplement_2.pdf
- elife_poa_e37072_Figure_2_figure_supplement_1.pdf
- elife_poa_e37072_Figure_3_source_data_1.xlsx
- elife_poa_e37072_Transparent_Reporting_File.pdf
- elife_poa_e37072_Figure_1_figure_supplement_6.pdf
- elife_poa_e37072_Figure_1_figure_supplement_4.pdf
- elife_poa_e37072_Figure_2_figure_supplement_2.pdf
- elife_poa_e37072_Figure_1_figure_supplement_7.pdf
