# Supplementary material for: Changes in the genetic requirements for microbial interactions with increasing community complexity
Source: eLife journal article supplement (doi:10.7554/elife.37072), 2018-09-13
Supplement: supp [file elife-37072-supp-v1.zip › elife_poa_e37072_Figure_1_figure_supplement_4_source_data_1.xlsx]

## Sheet: Raw data
Raw data - RB-TnSeq analysis of the P. psychriphila JB418 library on CCA, gene fitness values and t-score values - Growths alone, in pairwise conditions and with the community.
Alone													with H. alvei													with G. candidum													with P. camemberti
Day 1				Day 2				Day 3					Day 1				Day 2				Day 3					Day 1				Day 2				Day 3					Day 1				Day 2				Day 3
Gene_Id	Fitness values	t-score		Gene_Id	Fitness values	t-score		Gene_Id	Fitness values	t-score			Gene_Id	Fitness values	t-score		Gene_Id	Fitness values	t-score		Gene_Id	Fitness values	t-score			Gene_Id	Fitness values	t-score		Gene_Id	Fitness values	t-score		Gene_Id	Fitness values	t-score			Gene_Id	Fitness values	t-score		Gene_Id	Fitness values	t-score		Gene_Id	Fitness values	t-score
Ga0212129_1110	-0.179221	-0.44903		Ga0212129_1110	-0.397101	-0.636693		Ga0212129_1110	-0.344173	-1.01461			Ga0212129_1110	-0.396987	-1.14271		Ga0212129_1110	-0.136013	-0.372766		Ga0212129_1110	-0.13099	-0.292248			Ga0212129_1110	-0.634433	-1.6915		Ga0212129_1110	-0.129618	-0.395813		Ga0212129_1110	-0.0185428	-0.0516836			Ga0212129_1110	-0.216551	-0.811237		Ga0212129_1110	-0.230356	-0.653542		Ga0212129_1110	-0.260976	-0.71534
Ga0212129_111001	0.123819	0.764389		Ga0212129_111001	0.248942	1.38807		Ga0212129_111001	0.392178	2.11837			Ga0212129_111001	0.156607	0.856958		Ga0212129_111001	0.112705	0.630216		Ga0212129_111001	0.234182	1.4306			Ga0212129_111001	0.164174	0.938612		Ga0212129_111001	0.180009	1.04481		Ga0212129_111001	0.22539	1.2349			Ga0212129_111001	0.125472	0.758751		Ga0212129_111001	0.220561	1.27384		Ga0212129_111001	0.177958	1.03485
Ga0212129_111002	0.137492	0.760163		Ga0212129_111002	-0.00643735	-0.0320958		Ga0212129_111002	-0.109232	-0.541112			Ga0212129_111002	-0.118014	-0.824268		Ga0212129_111002	-0.134796	-0.825435		Ga0212129_111002	-0.224292	-1.34266			Ga0212129_111002	-0.229664	-1.46899		Ga0212129_111002	-0.289964	-1.80258		Ga0212129_111002	-0.321186	-1.97801			Ga0212129_111002	-0.210261	-1.28145		Ga0212129_111002	-0.29123	-1.78319		Ga0212129_111002	-0.19714	-1.24189
Ga0212129_111003	-0.0864647	-0.412572		Ga0212129_111003	0.175964	0.644954		Ga0212129_111003	-0.0639548	-0.291405			Ga0212129_111003	-0.0136977	-0.069279		Ga0212129_111003	-0.0130627	-0.0666693		Ga0212129_111003	-0.0162508	-0.0806148			Ga0212129_111003	-0.114624	-0.659495		Ga0212129_111003	-0.0609081	-0.313035		Ga0212129_111003	-0.137427	-0.780802			Ga0212129_111003	0.0181268	0.0898712		Ga0212129_111003	-0.070838	-0.358924		Ga0212129_111003	-0.159801	-0.853813
Ga0212129_111004	0.0646387	0.238441		Ga0212129_111004	0.00691822	0.0237934		Ga0212129_111004	0.228934	0.992591			Ga0212129_111004	0.120089	0.503352		Ga0212129_111004	-0.0731887	-0.273393		Ga0212129_111004	-0.143475	-0.555102			Ga0212129_111004	-0.0481053	-0.197073		Ga0212129_111004	-0.189723	-0.754276		Ga0212129_111004	0.0837772	0.343716			Ga0212129_111004	0.00481231	0.020204		Ga0212129_111004	-0.124342	-0.510748		Ga0212129_111004	-0.0214465	-0.092487
Ga0212129_111006	-0.148327	-0.645058		Ga0212129_111006	0.0383301	0.145932		Ga0212129_111006	-0.196513	-0.811647			Ga0212129_111006	0.0381131	0.21439		Ga0212129_111006	-0.132736	-0.654045		Ga0212129_111006	0.0250609	0.13002			Ga0212129_111006	-0.0737865	-0.403001		Ga0212129_111006	-0.0595749	-0.292122		Ga0212129_111006	0.10763	0.607088			Ga0212129_111006	-0.124239	-0.647518		Ga0212129_111006	-0.16438	-0.912224		Ga0212129_111006	-0.0357744	-0.186789
Ga0212129_111007	-0.200029	-0.450172		Ga0212129_111007	0.467627	1.33016		Ga0212129_111007	-0.118304	-0.303305			Ga0212129_111007	-0.116629	-0.398048		Ga0212129_111007	-0.032108	-0.0736975		Ga0212129_111007	0.0129314	0.0318991			Ga0212129_111007	-0.27462	-0.636574		Ga0212129_111007	0.0214828	0.0464905		Ga0212129_111007	-0.155352	-0.514116			Ga0212129_111007	-0.176272	-0.353059		Ga0212129_111007	0.0144149	0.0498207		Ga0212129_111007	0.0729245	0.17544
Ga0212129_111009	-0.0501	-0.31445		Ga0212129_111009	0.0524223	0.30642		Ga0212129_111009	0.0518804	0.32385			Ga0212129_111009	-0.0682015	-0.528177		Ga0212129_111009	-0.0570697	-0.416735		Ga0212129_111009	0.0353486	0.251138			Ga0212129_111009	-0.142573	-1.06848		Ga0212129_111009	0.00429566	0.0310161		Ga0212129_111009	-0.116053	-0.885651			Ga0212129_111009	-0.0697188	-0.515526		Ga0212129_111009	-0.0743491	-0.519702		Ga0212129_111009	-0.111225	-0.807465
Ga0212129_11101	-0.0531753	-0.120641		Ga0212129_11101	-0.296003	-0.750803		Ga0212129_11101	0.080056	0.207058			Ga0212129_11101	-0.0512836	-0.182425		Ga0212129_11101	-0.161866	-0.49904		Ga0212129_11101	0.0431852	0.137414			Ga0212129_11101	-0.177297	-0.555593		Ga0212129_11101	0.220564	0.875844		Ga0212129_11101	-0.105321	-0.317283			Ga0212129_11101	-0.112889	-0.414678		Ga0212129_11101	-0.0810478	-0.26241		Ga0212129_11101	0.0862942	0.276432
Ga0212129_111011	-0.100617	-0.319059		Ga0212129_111011	-0.0995993	-0.29471		Ga0212129_111011	0.355512	1.05856			Ga0212129_111011	0.168706	0.577325		Ga0212129_111011	-0.121304	-0.470839		Ga0212129_111011	-0.0640026	-0.258746			Ga0212129_111011	-0.260297	-1.04775		Ga0212129_111011	-0.273033	-1.05803		Ga0212129_111011	-0.0608253	-0.216255			Ga0212129_111011	-0.154724	-0.553607		Ga0212129_111011	-0.370347	-1.42569		Ga0212129_111011	0.221612	0.89
Ga0212129_111012	-0.0490449	-0.28228		Ga0212129_111012	0.0473594	0.242023		Ga0212129_111012	0.0587834	0.313055			Ga0212129_111012	-0.0526296	-0.339636		Ga0212129_111012	-0.152559	-0.932032		Ga0212129_111012	-0.100069	-0.609584			Ga0212129_111012	-0.0980749	-0.585014		Ga0212129_111012	-0.190387	-1.17041		Ga0212129_111012	-0.166783	-1.02051			Ga0212129_111012	-0.130662	-0.790417		Ga0212129_111012	-0.109403	-0.657246		Ga0212129_111012	-0.0368661	-0.218515
Ga0212129_111013	-0.000850994	-0.00647812		Ga0212129_111013	0.156938	1.2012		Ga0212129_111013	0.0948936	0.722011			Ga0212129_111013	-0.0226872	-0.184749		Ga0212129_111013	-0.00174754	-0.0141811		Ga0212129_111013	-0.0242098	-0.196161			Ga0212129_111013	-0.0520799	-0.420971		Ga0212129_111013	-0.088923	-0.710347		Ga0212129_111013	-0.042741	-0.344037			Ga0212129_111013	-0.0303511	-0.239947		Ga0212129_111013	-0.0123468	-0.0998641		Ga0212129_111013	-0.0270264	-0.229528
Ga0212129_111014	0.279978	1.38835		Ga0212129_111014	0.0614552	0.235495		Ga0212129_111014	0.0939779	0.448089			Ga0212129_111014	0.0266157	0.121634		Ga0212129_111014	0.0547446	0.257954		Ga0212129_111014	0.145362	0.659768			Ga0212129_111014	0.0304124	0.136796		Ga0212129_111014	0.133462	0.605847		Ga0212129_111014	0.0558559	0.24997			Ga0212129_111014	0.14024	0.60438		Ga0212129_111014	0.0328949	0.146503		Ga0212129_111014	0.161089	0.769626
Ga0212129_111015	0.1792	1.04513		Ga0212129_111015	0.0871441	0.469158		Ga0212129_111015	0.0656157	0.386981			Ga0212129_111015	-0.00714157	-0.0511016		Ga0212129_111015	-0.0413734	-0.271966		Ga0212129_111015	-0.0249634	-0.162646			Ga0212129_111015	-0.0748112	-0.501171		Ga0212129_111015	-0.0114878	-0.0782242		Ga0212129_111015	0.0630359	0.43652			Ga0212129_111015	-0.0863145	-0.545364		Ga0212129_111015	-0.176978	-1.22227		Ga0212129_111015	-0.0422389	-0.277128
Ga0212129_111017	-0.254669	-1.34561		Ga0212129_111017	-0.00406933	-0.0175238		Ga0212129_111017	0.0867062	0.450969			Ga0212129_111017	0.00627672	0.034106		Ga0212129_111017	-0.0105321	-0.0597511		Ga0212129_111017	0.253062	1.4309			Ga0212129_111017	-0.11233	-0.602052		Ga0212129_111017	0.007979	0.0449181		Ga0212129_111017	0.0434358	0.235257			Ga0212129_111017	0.0547582	0.323056		Ga0212129_111017	0.054234	0.297042		Ga0212129_111017	0.0196936	0.107788
Ga0212129_111018	0.0467772	0.310524		Ga0212129_111018	-0.0351327	-0.210151		Ga0212129_111018	0.0430553	0.247204			Ga0212129_111018	-0.0386943	-0.275454		Ga0212129_111018	0.0261392	0.191742		Ga0212129_111018	-0.019819	-0.136554			Ga0212129_111018	-0.0118215	-0.0834853		Ga0212129_111018	-0.00145332	-0.0100538		Ga0212129_111018	0.0666379	0.496234			Ga0212129_111018	-0.00273547	-0.0182019		Ga0212129_111018	-0.0983276	-0.711207		Ga0212129_111018	-0.00173824	-0.0130839
Ga0212129_111019	-0.0288776	-0.233714		Ga0212129_111019	-0.154794	-1.21898		Ga0212129_111019	-0.377685	-2.93993			Ga0212129_111019	0.0998267	0.867155		Ga0212129_111019	-0.130121	-1.10548		Ga0212129_111019	-0.240522	-2.07828			Ga0212129_111019	0.0313709	0.27383		Ga0212129_111019	-0.233079	-2.00738		Ga0212129_111019	-0.243237	-2.09852			Ga0212129_111019	0.16002	1.37148		Ga0212129_111019	-0.400408	-3.4152		Ga0212129_111019	-0.266087	-2.29966
Ga0212129_11102	0.468178	1.5205		Ga0212129_11102	-0.174281	-0.333122		Ga0212129_11102	-0.104533	-0.320649			Ga0212129_11102	0.288364	1.07951		Ga0212129_11102	0.145896	0.557015		Ga0212129_11102	0.398425	1.63758			Ga0212129_11102	0.199437	0.804864		Ga0212129_11102	0.344048	1.30931		Ga0212129_11102	0.153095	0.62195			Ga0212129_11102	0.222431	0.907457		Ga0212129_11102	0.387125	1.52274		Ga0212129_11102	0.0961881	0.337786
Ga0212129_111020	-0.268642	-1.10649		Ga0212129_111020	-0.82796	-2.59905		Ga0212129_111020	-1.00706	-3.214			Ga0212129_111020	-0.515437	-2.45036		Ga0212129_111020	-0.672992	-3.28049		Ga0212129_111020	-0.794884	-3.51229			Ga0212129_111020	-0.451984	-2.1573		Ga0212129_111020	-0.625261	-3.30847		Ga0212129_111020	-0.891671	-5.08587			Ga0212129_111020	-0.590331	-2.81199		Ga0212129_111020	-1.04989	-5.02766		Ga0212129_111020	-0.862194	-4.02894
Ga0212129_111021	-0.442538	-1.67871		Ga0212129_111021	-0.0983503	-0.360621		Ga0212129_111021	-0.391492	-1.65192			Ga0212129_111021	-0.0983526	-0.541494		Ga0212129_111021	-0.182336	-1.04267		Ga0212129_111021	-0.0881176	-0.493398			Ga0212129_111021	-0.257199	-1.4032		Ga0212129_111021	-0.249716	-1.36344		Ga0212129_111021	-0.114958	-0.65308			Ga0212129_111021	0.0652919	0.335283		Ga0212129_111021	-0.181683	-0.966958		Ga0212129_111021	-0.200956	-1.06162
Ga0212129_111023	0.0671484	0.131595		Ga0212129_111023	0.769983	2.2215		Ga0212129_111023	0.356154	0.820725			Ga0212129_111023	0.475594	1.52552		Ga0212129_111023	0.510644	1.83738		Ga0212129_111023	0.412544	1.29299			Ga0212129_111023	0.386027	1.19296		Ga0212129_111023	0.650098	2.06235		Ga0212129_111023	0.560889	1.80891			Ga0212129_111023	0.551728	2.05993		Ga0212129_111023	0.560285	1.91545		Ga0212129_111023	0.646409	2.09497
Ga0212129_111024	-0.244009	-1.42261		Ga0212129_111024	-0.32246	-1.70305		Ga0212129_111024	-0.273645	-1.71007			Ga0212129_111024	-0.344843	-2.52481		Ga0212129_111024	-0.53356	-3.82549		Ga0212129_111024	-0.296987	-2.01335			Ga0212129_111024	-0.167103	-1.20414		Ga0212129_111024	-0.380827	-2.60446		Ga0212129_111024	-0.151216	-1.01098			Ga0212129_111024	-0.380549	-2.66451		Ga0212129_111024	-0.313197	-2.1989		Ga0212129_111024	-0.296869	-2.01193
Ga0212129_111026	0.0706604	0.389605		Ga0212129_111026	-0.178336	-0.829448		Ga0212129_111026	-0.0338078	-0.158994			Ga0212129_111026	-0.0101466	-0.0599336		Ga0212129_111026	0.0366595	0.201186		Ga0212129_111026	-0.0113207	-0.063484			Ga0212129_111026	-0.0557397	-0.303336		Ga0212129_111026	-0.150766	-0.819516		Ga0212129_111026	-0.0903662	-0.519616			Ga0212129_111026	0.0153866	0.0871686		Ga0212129_111026	-0.125722	-0.696253		Ga0212129_111026	0.0447989	0.260652
Ga0212129_111027	-0.321692	-1.17075		Ga0212129_111027	0.177435	0.537677		Ga0212129_111027	-0.184002	-0.689088			Ga0212129_111027	-0.251879	-1.2172		Ga0212129_111027	-0.216561	-0.908866		Ga0212129_111027	-0.232052	-1.00243			Ga0212129_111027	-0.338133	-1.40645		Ga0212129_111027	-0.29585	-1.00483		Ga0212129_111027	-0.264292	-1.15343			Ga0212129_111027	-0.324507	-1.49646		Ga0212129_111027	-0.250172	-1.08294		Ga0212129_111027	-0.209115	-0.878564
Ga0212129_111028	-0.105311	-0.551452		Ga0212129_111028	-0.22064	-1.19375		Ga0212129_111028	-0.053742	-0.266693			Ga0212129_111028	-0.124266	-0.799567		Ga0212129_111028	-0.005613	-0.0360229		Ga0212129_111028	-0.0298279	-0.189987			Ga0212129_111028	-0.0852606	-0.554164		Ga0212129_111028	-0.0756127	-0.447019		Ga0212129_111028	-0.0628125	-0.405752			Ga0212129_111028	-0.0503628	-0.294148		Ga0212129_111028	-0.00684147	-0.044512		Ga0212129_111028	-0.0478904	-0.316139
Ga0212129_111029	-0.520985	-2.87739		Ga0212129_111029	0.000789075	0.00352206		Ga0212129_111029	0.0670822	0.340217			Ga0212129_111029	-0.0766267	-0.468764		Ga0212129_111029	-0.164741	-0.938508		Ga0212129_111029	-0.170406	-1.05045			Ga0212129_111029	-0.209546	-1.2891		Ga0212129_111029	-0.138819	-0.816751		Ga0212129_111029	-0.0597795	-0.369086			Ga0212129_111029	-0.213533	-1.22238		Ga0212129_111029	-0.224915	-1.44034		Ga0212129_111029	-0.136262	-0.845616
Ga0212129_11103	0.254772	0.822233		Ga0212129_11103	0.308298	1.03794		Ga0212129_11103	0.423601	1.48279			Ga0212129_11103	0.243663	1.07802		Ga0212129_11103	0.390228	1.60697		Ga0212129_11103	0.365505	1.60395			Ga0212129_11103	0.224817	1.1151		Ga0212129_11103	0.454666	2.01203		Ga0212129_11103	0.35954	1.66342			Ga0212129_11103	0.188371	0.846104		Ga0212129_11103	0.349962	1.57534		Ga0212129_11103	0.351131	1.47621
Ga0212129_111030	-0.334429	-1.68471		Ga0212129_111030	-0.220398	-1.05181		Ga0212129_111030	-0.00707005	-0.0384375			Ga0212129_111030	-0.085355	-0.512784		Ga0212129_111030	-0.0167529	-0.0930637		Ga0212129_111030	-0.0221861	-0.120716			Ga0212129_111030	-0.0766622	-0.42279		Ga0212129_111030	-0.0160971	-0.0909585		Ga0212129_111030	-0.0668073	-0.382578			Ga0212129_111030	-0.0413169	-0.226017		Ga0212129_111030	-0.0812463	-0.428712		Ga0212129_111030	-0.0853576	-0.501516
Ga0212129_111031	0.053578	0.377937		Ga0212129_111031	0.163081	1.07173		Ga0212129_111031	0.0330919	0.218636			Ga0212129_111031	-0.0864636	-0.675244		Ga0212129_111031	-0.156534	-1.13024		Ga0212129_111031	-0.0619734	-0.456343			Ga0212129_111031	-0.173581	-1.25857		Ga0212129_111031	-0.149643	-1.05434		Ga0212129_111031	-0.0225432	-0.168215			Ga0212129_111031	-0.155853	-1.0858		Ga0212129_111031	-0.0214148	-0.15388		Ga0212129_111031	-0.0266355	-0.191937
Ga0212129_111032	-0.21588	-1.38418		Ga0212129_111032	-0.181318	-0.964307		Ga0212129_111032	-0.146477	-0.841555			Ga0212129_111032	-0.278213	-1.88532		Ga0212129_111032	-0.151016	-1.06094		Ga0212129_111032	-0.0675281	-0.457368			Ga0212129_111032	-0.278446	-1.88159		Ga0212129_111032	-0.250846	-1.69302		Ga0212129_111032	-0.145416	-0.991897			Ga0212129_111032	-0.103998	-0.732818		Ga0212129_111032	-0.22882	-1.51794		Ga0212129_111032	-0.114699	-0.813889
Ga0212129_111033	-0.20317	-1.19668		Ga0212129_111033	-0.187169	-0.867897		Ga0212129_111033	-0.205682	-1.16199			Ga0212129_111033	-0.350189	-2.43713		Ga0212129_111033	-0.239372	-1.63126		Ga0212129_111033	-0.192614	-1.283			Ga0212129_111033	-0.266188	-1.86421		Ga0212129_111033	-0.276328	-1.86128		Ga0212129_111033	-0.295249	-1.99665			Ga0212129_111033	-0.232862	-1.55554		Ga0212129_111033	-0.336938	-2.23858		Ga0212129_111033	-0.300742	-2.08531
Ga0212129_111034	0.0891937	0.447055		Ga0212129_111034	-0.208048	-0.761312		Ga0212129_111034	-0.036072	-0.143011			Ga0212129_111034	-0.307472	-1.63571		Ga0212129_111034	-0.435184	-2.05112		Ga0212129_111034	-0.3453	-1.65231			Ga0212129_111034	-0.343564	-1.72129		Ga0212129_111034	-0.392	-1.93173		Ga0212129_111034	-0.103771	-0.562912			Ga0212129_111034	-0.353064	-1.5349		Ga0212129_111034	-0.313069	-1.41331		Ga0212129_111034	-0.208704	-1.06413
Ga0212129_111035	-0.16445	-0.861551		Ga0212129_111035	-0.406367	-1.68555		Ga0212129_111035	-0.00595826	-0.029423			Ga0212129_111035	-0.293188	-1.47272		Ga0212129_111035	-0.283396	-1.47924		Ga0212129_111035	-0.319282	-1.60412			Ga0212129_111035	-0.286817	-1.65865		Ga0212129_111035	-0.334354	-1.84127		Ga0212129_111035	-0.199273	-1.05035			Ga0212129_111035	-0.362952	-2.08103		Ga0212129_111035	-0.335319	-1.68392		Ga0212129_111035	-0.46827	-2.58608
Ga0212129_111037	-0.057487	-0.42841		Ga0212129_111037	-0.188054	-1.2067		Ga0212129_111037	-0.210168	-1.35994			Ga0212129_111037	-0.201251	-1.55254		Ga0212129_111037	-0.201061	-1.55649		Ga0212129_111037	-0.118314	-0.887461			Ga0212129_111037	-0.235898	-1.78846		Ga0212129_111037	-0.197208	-1.46526		Ga0212129_111037	-0.190818	-1.4773			Ga0212129_111037	-0.21253	-1.57313		Ga0212129_111037	-0.191287	-1.40523		Ga0212129_111037	-0.149929	-1.12436
Ga0212129_111038	-0.466913	-2.52581		Ga0212129_111038	-0.506338	-2.63135		Ga0212129_111038	-0.064474	-0.368155			Ga0212129_111038	-0.375907	-2.81113		Ga0212129_111038	-0.287515	-1.95169		Ga0212129_111038	-0.0311529	-0.207976			Ga0212129_111038	-0.409109	-2.74084		Ga0212129_111038	-0.194051	-1.29277		Ga0212129_111038	-0.0161248	-0.114475			Ga0212129_111038	-0.427046	-2.85546		Ga0212129_111038	-0.178381	-1.14362		Ga0212129_111038	-0.265008	-1.8366
Ga0212129_111039	-0.00394996	-0.0150233		Ga0212129_111039	0.0610059	0.256597		Ga0212129_111039	-0.0432712	-0.138651			Ga0212129_111039	-0.0275733	-0.144858		Ga0212129_111039	0.0419236	0.211934		Ga0212129_111039	0.126941	0.516631			Ga0212129_111039	-0.226146	-1.04651		Ga0212129_111039	0.0174367	0.0831137		Ga0212129_111039	-0.168974	-0.748625			Ga0212129_111039	-0.056801	-0.291916		Ga0212129_111039	0.045233	0.197175		Ga0212129_111039	0.05123	0.246357
Ga0212129_11104	-0.10355	-0.379561		Ga0212129_11104	0.154085	0.427532		Ga0212129_11104	-0.051013	-0.155878			Ga0212129_11104	-0.0124231	-0.0476662		Ga0212129_11104	-0.0756672	-0.314014		Ga0212129_11104	-0.0553202	-0.227853			Ga0212129_11104	-0.0661865	-0.26724		Ga0212129_11104	-0.114353	-0.490329		Ga0212129_11104	-0.21823	-0.892743			Ga0212129_11104	-0.260755	-1.02242		Ga0212129_11104	-0.0901675	-0.372054		Ga0212129_11104	0.0478289	0.210031
Ga0212129_111040	-0.00229494	-0.0101797		Ga0212129_111040	0.0968758	0.438967		Ga0212129_111040	0.43055	2.1881			Ga0212129_111040	0.107511	0.610333		Ga0212129_111040	-0.0499557	-0.260112		Ga0212129_111040	-0.0420844	-0.218949			Ga0212129_111040	0.00116499	0.00631833		Ga0212129_111040	-0.0613111	-0.31023		Ga0212129_111040	0.042761	0.229381			Ga0212129_111040	-0.0425222	-0.211572		Ga0212129_111040	0.0285678	0.150163		Ga0212129_111040	0.0313644	0.160047
Ga0212129_111041	-0.321913	-1.74651		Ga0212129_111041	-0.614707	-2.75672		Ga0212129_111041	-0.378588	-1.93067			Ga0212129_111041	-0.275949	-1.62372		Ga0212129_111041	-0.571353	-3.47868		Ga0212129_111041	-0.53551	-3.00234			Ga0212129_111041	-0.336337	-2.0773		Ga0212129_111041	-0.478749	-2.73253		Ga0212129_111041	-0.306379	-1.90841			Ga0212129_111041	-0.322394	-1.8478		Ga0212129_111041	-0.45392	-2.64814		Ga0212129_111041	-0.544111	-3.44469
Ga0212129_111042	-0.357673	-2.50251		Ga0212129_111042	-0.39149	-2.35001		Ga0212129_111042	-0.232722	-1.51635			Ga0212129_111042	-0.378147	-2.82006		Ga0212129_111042	-0.673926	-4.96473		Ga0212129_111042	-0.61476	-4.48809			Ga0212129_111042	-0.353143	-2.58393		Ga0212129_111042	-0.552138	-4.03145		Ga0212129_111042	-0.456151	-3.47366			Ga0212129_111042	-0.382184	-2.72974		Ga0212129_111042	-0.517938	-3.83105		Ga0212129_111042	-0.543875	-4.03389
Ga0212129_111043	-0.20305	-1.07504		Ga0212129_111043	-0.283443	-1.23213		Ga0212129_111043	-0.00263921	-0.0154167			Ga0212129_111043	-0.331466	-1.94498		Ga0212129_111043	-0.347343	-2.04054		Ga0212129_111043	-0.340994	-1.85689			Ga0212129_111043	-0.386003	-2.28689		Ga0212129_111043	-0.444963	-2.48877		Ga0212129_111043	-0.378408	-2.43775			Ga0212129_111043	-0.398169	-2.21326		Ga0212129_111043	-0.224683	-1.31965		Ga0212129_111043	-0.327205	-1.90673
Ga0212129_111044	0.490009	0.881966		Ga0212129_111044	1.15073	1.66		Ga0212129_111044	-0.465085	-1.03464			Ga0212129_111044	0.45635	0.875349		Ga0212129_111044	0.41542	0.713662		Ga0212129_111044	0.60865	1.09579			Ga0212129_111044	0.57853	1.16683		Ga0212129_111044	0.44735	0.715764		Ga0212129_111044	0.742168	1.3638			Ga0212129_111044	0.529539	0.790465		Ga0212129_111044	0.242964	0.506163		Ga0212129_111044	0.296579	0.557891
Ga0212129_111045	-0.00139266	-0.00954008		Ga0212129_111045	-0.203752	-1.29277		Ga0212129_111045	-0.0125506	-0.0904624			Ga0212129_111045	-0.136292	-1.08204		Ga0212129_111045	-0.13079	-1.04111		Ga0212129_111045	-0.172168	-1.30101			Ga0212129_111045	-0.209833	-1.66253		Ga0212129_111045	-0.222162	-1.7114		Ga0212129_111045	-0.0642123	-0.509251			Ga0212129_111045	-0.209859	-1.57337		Ga0212129_111045	-0.220799	-1.67745		Ga0212129_111045	-0.146561	-1.12669
Ga0212129_111046	0.0358629	0.272045		Ga0212129_111046	-0.0382268	-0.263328		Ga0212129_111046	-0.0119487	-0.0828599			Ga0212129_111046	-0.034174	-0.27918		Ga0212129_111046	0.0446763	0.361345		Ga0212129_111046	0.0598799	0.480126			Ga0212129_111046	-0.0281229	-0.222322		Ga0212129_111046	0.0154464	0.124172		Ga0212129_111046	-0.0328887	-0.264788			Ga0212129_111046	0.0396592	0.306301		Ga0212129_111046	-0.0923753	-0.742819		Ga0212129_111046	0.0264582	0.211238
Ga0212129_111047	-1.12987	-4.62482		Ga0212129_111047	-0.695459	-2.52112		Ga0212129_111047	-0.992255	-3.61239			Ga0212129_111047	-1.03946	-5.7983		Ga0212129_111047	-0.916058	-5.19264		Ga0212129_111047	-0.913201	-4.70463			Ga0212129_111047	-1.04614	-5.32609		Ga0212129_111047	-1.06077	-5.36236		Ga0212129_111047	-1.01189	-5.26548			Ga0212129_111047	-0.788211	-4.12353		Ga0212129_111047	-0.869874	-4.06859		Ga0212129_111047	-0.806639	-4.45446
Ga0212129_111048	-0.0788725	-0.345663		Ga0212129_111048	0.101302	0.26179		Ga0212129_111048	-0.081326	-0.236652			Ga0212129_111048	-0.105211	-0.537487		Ga0212129_111048	-0.188053	-0.888055		Ga0212129_111048	-0.14354	-0.640618			Ga0212129_111048	-0.211784	-1.03511		Ga0212129_111048	-0.222319	-0.908686		Ga0212129_111048	-0.0287142	-0.137057			Ga0212129_111048	-0.154354	-0.652447		Ga0212129_111048	-0.095507	-0.477887		Ga0212129_111048	-0.191685	-0.897543
Ga0212129_11105	0.496399	2.22075		Ga0212129_11105	-0.0312103	-0.104112		Ga0212129_11105	0.344658	1.44759			Ga0212129_11105	0.356912	1.80437		Ga0212129_11105	0.518411	2.44114		Ga0212129_11105	0.371951	1.86013			Ga0212129_11105	0.279897	1.29168		Ga0212129_11105	0.398756	1.98447		Ga0212129_11105	0.344754	1.66044			Ga0212129_11105	0.334796	1.57006		Ga0212129_11105	0.345746	1.72416		Ga0212129_11105	0.505013	2.66803
Ga0212129_111052	-3.41329	-3.24847		Ga0212129_111052	-3.66872	-2.50511		Ga0212129_111052	-2.4256	-3.50235			Ga0212129_111052	-2.84946	-6.02766		Ga0212129_111052	-3.30233	-5.80573		Ga0212129_111052	-2.2656	-4.38026			Ga0212129_111052	-2.85223	-5.5013		Ga0212129_111052	-2.92515	-5.22796		Ga0212129_111052	-1.91473	-4.46148			Ga0212129_111052	-2.5615	-5.91609		Ga0212129_111052	-2.17788	-4.64038		Ga0212129_111052	-2.25415	-5.12499
Ga0212129_111053	-0.87229	-2.14907		Ga0212129_111053	-0.401612	-0.490602		Ga0212129_111053	0.0265855	0.0632591			Ga0212129_111053	-0.457462	-1.59696		Ga0212129_111053	-0.597382	-1.73664		Ga0212129_111053	-0.297526	-0.867681			Ga0212129_111053	-0.540615	-1.80412		Ga0212129_111053	-0.581072	-2.03377		Ga0212129_111053	-0.673931	-2.16083			Ga0212129_111053	-0.569449	-1.83884		Ga0212129_111053	-0.481075	-1.72025		Ga0212129_111053	-0.309732	-0.975853
Ga0212129_111056	-0.544808	-2.1809		Ga0212129_111056	-1.3816	-4.98666		Ga0212129_111056	-0.767964	-3.32025			Ga0212129_111056	-0.851736	-5.11769		Ga0212129_111056	-0.935554	-5.4169		Ga0212129_111056	-0.652983	-3.36916			Ga0212129_111056	-0.743535	-4.40808		Ga0212129_111056	-0.820498	-4.94508		Ga0212129_111056	-0.561936	-3.29576			Ga0212129_111056	-0.971692	-5.33885		Ga0212129_111056	-0.755674	-3.96989		Ga0212129_111056	-0.872937	-5.14893
Ga0212129_111057	-1.0601	-2.02502		Ga0212129_111057	-1.79453	-3.15651		Ga0212129_111057	-1.88911	-3.26466			Ga0212129_111057	-0.943132	-3.08571		Ga0212129_111057	-0.924518	-3.23105		Ga0212129_111057	-1.25195	-4.20932			Ga0212129_111057	-1.10025	-3.82649		Ga0212129_111057	-1.06658	-3.51822		Ga0212129_111057	-0.750752	-2.68571			Ga0212129_111057	-0.909507	-2.30841		Ga0212129_111057	-1.62839	-4.91838		Ga0212129_111057	-1.4483	-4.43317
Ga0212129_111058	-0.895	-5.7012		Ga0212129_111058	-1.06515	-5.47137		Ga0212129_111058	-0.81733	-4.44566			Ga0212129_111058	-0.880345	-6.78166		Ga0212129_111058	-0.842431	-6.18357		Ga0212129_111058	-0.617394	-4.50791			Ga0212129_111058	-0.792009	-6.03485		Ga0212129_111058	-0.763549	-5.49879		Ga0212129_111058	-0.595233	-4.36028			Ga0212129_111058	-0.936004	-6.98454		Ga0212129_111058	-0.715546	-5.26024		Ga0212129_111058	-0.665952	-4.80587
Ga0212129_111059	-0.931191	-4.12747		Ga0212129_111059	-1.04224	-3.18708		Ga0212129_111059	-0.878625	-3.76707			Ga0212129_111059	-0.753136	-4.20724		Ga0212129_111059	-0.962859	-4.75188		Ga0212129_111059	-0.452937	-2.3			Ga0212129_111059	-0.798172	-4.42722		Ga0212129_111059	-0.806159	-3.9601		Ga0212129_111059	-0.764131	-3.82626			Ga0212129_111059	-1.01215	-4.62749		Ga0212129_111059	-0.818737	-4.9592		Ga0212129_111059	-0.660323	-3.48128
Ga0212129_111060	0.139185	0.708246		Ga0212129_111060	0.0692305	0.29244		Ga0212129_111060	0.286073	1.34103			Ga0212129_111060	-0.0610565	-0.390945		Ga0212129_111060	0.0686747	0.40365		Ga0212129_111060	-0.0117214	-0.0702316			Ga0212129_111060	-0.0359057	-0.232612		Ga0212129_111060	-0.0140332	-0.0796164		Ga0212129_111060	-0.0135971	-0.0796621			Ga0212129_111060	-0.0231759	-0.133107		Ga0212129_111060	0.0403123	0.264202		Ga0212129_111060	0.0302289	0.204753
Ga0212129_111061	0.0531716	0.385366		Ga0212129_111061	0.188361	1.1782		Ga0212129_111061	0.108861	0.736211			Ga0212129_111061	0.0278695	0.210274		Ga0212129_111061	0.0574626	0.447343		Ga0212129_111061	0.0610988	0.474969			Ga0212129_111061	-0.00125986	-0.00969379		Ga0212129_111061	0.0999795	0.772387		Ga0212129_111061	0.0307264	0.236227			Ga0212129_111061	0.11523	0.881343		Ga0212129_111061	0.0486973	0.39366		Ga0212129_111061	0.109725	0.852256
Ga0212129_111062	-0.19714	-0.519746		Ga0212129_111062	0.222972	0.559548		Ga0212129_111062	0.602615	1.791			Ga0212129_111062	0.0195539	0.0780007		Ga0212129_111062	0.0479423	0.150215		Ga0212129_111062	0.144633	0.504579			Ga0212129_111062	0.0508191	0.172812		Ga0212129_111062	0.0281135	0.111355		Ga0212129_111062	-0.0380969	-0.144628			Ga0212129_111062	-0.177043	-0.582769		Ga0212129_111062	0.0630846	0.232474		Ga0212129_111062	-0.0375322	-0.129041
Ga0212129_111063	-0.548273	-2.19763		Ga0212129_111063	-0.0469184	-0.155107		Ga0212129_111063	-0.459852	-2.34225			Ga0212129_111063	-0.329892	-1.70944		Ga0212129_111063	-0.244961	-1.22826		Ga0212129_111063	-0.0859254	-0.410319			Ga0212129_111063	-0.216613	-1.12062		Ga0212129_111063	-0.345648	-1.6631		Ga0212129_111063	-0.0961037	-0.46792			Ga0212129_111063	-0.248763	-1.16278		Ga0212129_111063	-0.175286	-0.881216		Ga0212129_111063	-0.244773	-1.30708
Ga0212129_111064	0.18604	0.981464		Ga0212129_111064	-0.102881	-0.402374		Ga0212129_111064	-0.163121	-0.717419			Ga0212129_111064	-0.076371	-0.406914		Ga0212129_111064	-0.0973055	-0.504023		Ga0212129_111064	-0.113014	-0.585111			Ga0212129_111064	-0.0671265	-0.370075		Ga0212129_111064	-0.107413	-0.560447		Ga0212129_111064	-0.0520942	-0.281484			Ga0212129_111064	-0.0729551	-0.361866		Ga0212129_111064	0.0495589	0.266752		Ga0212129_111064	0.0887353	0.458547
Ga0212129_111065	-0.0192414	-0.0730338		Ga0212129_111065	-0.41578	-1.43366		Ga0212129_111065	0.180289	0.718176			Ga0212129_111065	-0.399434	-1.97801		Ga0212129_111065	-0.183874	-0.96288		Ga0212129_111065	-0.0861301	-0.456857			Ga0212129_111065	-0.240998	-1.16761		Ga0212129_111065	-0.0178424	-0.0916763		Ga0212129_111065	-0.198727	-0.965862			Ga0212129_111065	-0.490768	-2.32928		Ga0212129_111065	-0.420663	-2.29455		Ga0212129_111065	-0.111358	-0.589403
Ga0212129_111066	0.223673	1.26143		Ga0212129_111066	0.43743	2.0105		Ga0212129_111066	-0.134816	-0.659454			Ga0212129_111066	0.139422	0.852276		Ga0212129_111066	0.229454	1.43791		Ga0212129_111066	0.146578	0.824043			Ga0212129_111066	0.0985405	0.631949		Ga0212129_111066	0.135498	0.774921		Ga0212129_111066	0.0711427	0.411093			Ga0212129_111066	0.223706	1.28501		Ga0212129_111066	0.167989	0.980798		Ga0212129_111066	0.140968	0.902154
Ga0212129_111067	0.177773	1.00689		Ga0212129_111067	-0.146445	-0.778524		Ga0212129_111067	0.0382779	0.222943			Ga0212129_111067	-0.0762034	-0.485199		Ga0212129_111067	-0.00174754	-0.0110964		Ga0212129_111067	0.0587769	0.347811			Ga0212129_111067	0.011991	0.0738048		Ga0212129_111067	0.0796221	0.511441		Ga0212129_111067	0.106295	0.72722			Ga0212129_111067	-0.085329	-0.525081		Ga0212129_111067	-0.0128346	-0.084965		Ga0212129_111067	0.131971	0.831602
Ga0212129_111068	-0.186836	-0.773805		Ga0212129_111068	0.361771	1.41751		Ga0212129_111068	0.0294144	0.122774			Ga0212129_111068	0.0821235	0.438556		Ga0212129_111068	0.037013	0.166424		Ga0212129_111068	0.125241	0.51682			Ga0212129_111068	0.157623	0.913598		Ga0212129_111068	0.0763943	0.349379		Ga0212129_111068	0.0980296	0.476137			Ga0212129_111068	0.0317922	0.15136		Ga0212129_111068	-0.0644903	-0.365912		Ga0212129_111068	0.0518635	0.232657
Ga0212129_111069	0.16079	0.441374		Ga0212129_111069	-0.207189	-0.429207		Ga0212129_111069	-0.16589	-0.396613			Ga0212129_111069	-0.492946	-1.21235		Ga0212129_111069	-0.299018	-0.786203		Ga0212129_111069	-0.413851	-0.977652			Ga0212129_111069	-0.420246	-1.14475		Ga0212129_111069	-0.623662	-1.51711		Ga0212129_111069	-0.456261	-1.72373			Ga0212129_111069	-0.169699	-0.526914		Ga0212129_111069	-0.434801	-1.29033		Ga0212129_111069	-0.156802	-0.448181
Ga0212129_11107	-0.117956	-0.625084		Ga0212129_11107	0.0680971	0.343212		Ga0212129_11107	-0.0356412	-0.205588			Ga0212129_11107	-0.0665882	-0.44565		Ga0212129_11107	0.000938495	0.00637501		Ga0212129_11107	0.0361738	0.241291			Ga0212129_11107	-0.0399663	-0.259123		Ga0212129_11107	0.00733174	0.0458678		Ga0212129_11107	-0.0258974	-0.159721			Ga0212129_11107	-0.109383	-0.650066		Ga0212129_11107	-0.0549061	-0.337358		Ga0212129_11107	0.0680388	0.423951
Ga0212129_111070	0.0198035	0.0687149		Ga0212129_111070	-0.221631	-0.935714		Ga0212129_111070	0.0964398	0.285109			Ga0212129_111070	0.238066	1.25175		Ga0212129_111070	0.34026	1.48122		Ga0212129_111070	0.44718	2.1839			Ga0212129_111070	0.114701	0.601943		Ga0212129_111070	0.0618555	0.234303		Ga0212129_111070	0.223346	1.01291			Ga0212129_111070	0.27039	1.44529		Ga0212129_111070	0.41699	1.85058		Ga0212129_111070	0.346421	1.79857
Ga0212129_111071	0.0169182	0.111989		Ga0212129_111071	0.197817	1.13976		Ga0212129_111071	0.185087	1.04172			Ga0212129_111071	-0.0391864	-0.265163		Ga0212129_111071	0.0275468	0.184457		Ga0212129_111071	0.0346495	0.219996			Ga0212129_111071	0.0121114	0.0834788		Ga0212129_111071	0.00346678	0.0234		Ga0212129_111071	0.0800404	0.53137			Ga0212129_111071	-0.0620522	-0.40352		Ga0212129_111071	0.0519424	0.362306		Ga0212129_111071	-0.0289129	-0.193865
Ga0212129_111072	0.00307826	0.0124635		Ga0212129_111072	0.219754	0.9269		Ga0212129_111072	0.408956	1.89114			Ga0212129_111072	0.274126	1.43584		Ga0212129_111072	0.431336	2.34497		Ga0212129_111072	0.341987	1.82187			Ga0212129_111072	0.381654	2.21035		Ga0212129_111072	0.432972	2.53563		Ga0212129_111072	0.346297	1.83973			Ga0212129_111072	0.283261	1.48765		Ga0212129_111072	0.275334	1.45382		Ga0212129_111072	0.393343	2.20045
Ga0212129_111073	0.047706	0.195365		Ga0212129_111073	0.114741	0.540181		Ga0212129_111073	0.159234	0.661231			Ga0212129_111073	0.00384107	0.0206589		Ga0212129_111073	0.123039	0.63095		Ga0212129_111073	0.10145	0.466589			Ga0212129_111073	-0.00656914	-0.03607		Ga0212129_111073	-0.0259457	-0.129566		Ga0212129_111073	0.0302848	0.157133			Ga0212129_111073	-0.0807364	-0.354283		Ga0212129_111073	0.0710075	0.363315		Ga0212129_111073	0.126944	0.666304
Ga0212129_111074	-0.262519	-1.41854		Ga0212129_111074	0.259985	1.23257		Ga0212129_111074	-0.447334	-2.21843			Ga0212129_111074	-0.0605034	-0.336233		Ga0212129_111074	0.0784669	0.453983		Ga0212129_111074	0.113212	0.651136			Ga0212129_111074	-0.0620491	-0.372166		Ga0212129_111074	0.0438839	0.24507		Ga0212129_111074	0.0570063	0.317408			Ga0212129_111074	0.0360991	0.201604		Ga0212129_111074	-0.0500428	-0.284841		Ga0212129_111074	-0.0230077	-0.131871
Ga0212129_111075	-0.172827	-0.944493		Ga0212129_111075	0.128625	0.683544		Ga0212129_111075	-0.267669	-1.37798			Ga0212129_111075	-0.0969286	-0.603789		Ga0212129_111075	-0.0283735	-0.150353		Ga0212129_111075	-0.162984	-0.983443			Ga0212129_111075	-0.0686148	-0.419401		Ga0212129_111075	-0.0633411	-0.348282		Ga0212129_111075	-0.0952999	-0.584534			Ga0212129_111075	-0.0518892	-0.295417		Ga0212129_111075	-0.133084	-0.89757		Ga0212129_111075	-0.0795612	-0.498257
Ga0212129_111076	0.418586	2.107		Ga0212129_111076	0.283674	1.42312		Ga0212129_111076	0.0257925	0.138572			Ga0212129_111076	0.274254	1.74365		Ga0212129_111076	0.371354	2.2497		Ga0212129_111076	0.366878	2.46704			Ga0212129_111076	0.25695	1.72839		Ga0212129_111076	0.300962	1.9037		Ga0212129_111076	0.286126	1.8383			Ga0212129_111076	0.328811	2.12978		Ga0212129_111076	0.190778	1.25722		Ga0212129_111076	0.406004	2.35984
Ga0212129_111077	-0.042	-0.136952		Ga0212129_111077	0.567983	2.16731		Ga0212129_111077	0.0806965	0.338994			Ga0212129_111077	0.0995483	0.434836		Ga0212129_111077	-0.099842	-0.494718		Ga0212129_111077	0.135557	0.621674			Ga0212129_111077	0.290842	1.56483		Ga0212129_111077	-0.00691145	-0.0334115		Ga0212129_111077	0.0309239	0.148741			Ga0212129_111077	-0.0165291	-0.0774507		Ga0212129_111077	0.00759988	0.0339438		Ga0212129_111077	0.101842	0.468202
Ga0212129_111078	0.17746	0.616571		Ga0212129_111078	-0.808185	-2.22704		Ga0212129_111078	-0.557659	-2.15345			Ga0212129_111078	0.0233778	0.0770871		Ga0212129_111078	0.16048	0.596765		Ga0212129_111078	-0.140137	-0.465002			Ga0212129_111078	0.00645699	0.0248946		Ga0212129_111078	0.0209944	0.0827189		Ga0212129_111078	-0.0820929	-0.295406			Ga0212129_111078	0.0745825	0.311438		Ga0212129_111078	-0.199086	-0.681647		Ga0212129_111078	0.116993	0.453889
Ga0212129_111079	-0.0526841	-0.286678		Ga0212129_111079	-0.212229	-0.958605		Ga0212129_111079	-0.373575	-1.96419			Ga0212129_111079	-0.0636668	-0.385032		Ga0212129_111079	-0.0539313	-0.34944		Ga0212129_111079	-0.129581	-0.864526			Ga0212129_111079	0.0171829	0.110413		Ga0212129_111079	-0.0735966	-0.437381		Ga0212129_111079	-0.0860613	-0.534828			Ga0212129_111079	0.0099874	0.0654606		Ga0212129_111079	-0.117116	-0.692017		Ga0212129_111079	-0.154957	-0.980304
Ga0212129_11108	0.167369	1.0123		Ga0212129_11108	0.431988	2.35904		Ga0212129_11108	0.284616	1.39498			Ga0212129_11108	0.195423	1.15806		Ga0212129_11108	0.283575	1.70776		Ga0212129_11108	0.229976	1.33824			Ga0212129_11108	0.296656	1.72663		Ga0212129_11108	0.244467	1.37205		Ga0212129_11108	0.30198	1.69277			Ga0212129_11108	0.165922	0.967252		Ga0212129_11108	0.29064	1.75617		Ga0212129_11108	0.271355	1.56202
Ga0212129_111080	-0.0102968	-0.0744064		Ga0212129_111080	-0.275435	-1.68995		Ga0212129_111080	-0.241135	-1.68647			Ga0212129_111080	0.0183274	0.145623		Ga0212129_111080	0.0553401	0.422293		Ga0212129_111080	0.11741	0.902924			Ga0212129_111080	-0.0276276	-0.212855		Ga0212129_111080	0.0263238	0.204463		Ga0212129_111080	0.0743183	0.567082			Ga0212129_111080	-0.0313259	-0.230454		Ga0212129_111080	-0.0302827	-0.234509		Ga0212129_111080	0.0120284	0.0927807
Ga0212129_111081	-0.187092	-1.12177		Ga0212129_111081	-0.0736789	-0.359808		Ga0212129_111081	-0.501301	-2.21442			Ga0212129_111081	-0.238828	-1.46318		Ga0212129_111081	-0.150181	-0.928357		Ga0212129_111081	-0.143126	-0.883682			Ga0212129_111081	-0.193016	-1.18983		Ga0212129_111081	-0.16757	-1.22093		Ga0212129_111081	-0.145411	-0.941066			Ga0212129_111081	-0.168846	-1.06689		Ga0212129_111081	-0.171448	-1.08175		Ga0212129_111081	-0.138142	-0.864469
Ga0212129_111082	-0.0961156	-0.738918		Ga0212129_111082	-0.116533	-0.826821		Ga0212129_111082	-0.0892003	-0.646393			Ga0212129_111082	0.00724977	0.0599125		Ga0212129_111082	0.0232198	0.190404		Ga0212129_111082	0.057157	0.465864			Ga0212129_111082	-0.0122611	-0.102509		Ga0212129_111082	-0.0204589	-0.166179		Ga0212129_111082	0.0707592	0.578741			Ga0212129_111082	-0.0336796	-0.27787		Ga0212129_111082	-0.0684071	-0.566537		Ga0212129_111082	0.0105666	0.0863999
Ga0212129_111085	-0.157017	-0.990554		Ga0212129_111085	-0.14806	-0.836081		Ga0212129_111085	-0.425891	-2.58147			Ga0212129_111085	-0.0535123	-0.376383		Ga0212129_111085	-0.0392274	-0.264645		Ga0212129_111085	-0.107573	-0.753447			Ga0212129_111085	0.0118057	0.0886095		Ga0212129_111085	-0.0465117	-0.345201		Ga0212129_111085	-0.0795239	-0.565429			Ga0212129_111085	-0.0765981	-0.556733		Ga0212129_111085	-0.103422	-0.761807		Ga0212129_111085	-0.0292772	-0.215566
Ga0212129_111087	-0.00162692	-0.0129601		Ga0212129_111087	-0.0447999	-0.34144		Ga0212129_111087	0.0514775	0.412928			Ga0212129_111087	0.0830105	0.705648		Ga0212129_111087	0.0972815	0.82304		Ga0212129_111087	0.120969	0.98952			Ga0212129_111087	-0.0353853	-0.299129		Ga0212129_111087	0.126548	1.06483		Ga0212129_111087	0.0792928	0.667732			Ga0212129_111087	-0.000806948	-0.00663851		Ga0212129_111087	0.0789298	0.660987		Ga0212129_111087	0.0737387	0.627146
Ga0212129_111088	0.336373	1.24951		Ga0212129_111088	-0.246125	-0.401935		Ga0212129_111088	-0.527681	-1.55734			Ga0212129_111088	0.0128601	0.0404789		Ga0212129_111088	0.151528	0.557549		Ga0212129_111088	0.211987	0.705094			Ga0212129_111088	-0.0531717	-0.142111		Ga0212129_111088	0.197907	0.57629		Ga0212129_111088	0.156593	0.523774			Ga0212129_111088	0.205146	0.664592		Ga0212129_111088	0.0826496	0.281335		Ga0212129_111088	-0.113139	-0.329907
Ga0212129_111089	0.473339	1.08168		Ga0212129_111089	0.0356719	0.0631322		Ga0212129_111089	0.8503	1.35496			Ga0212129_111089	0.21347	0.4276		Ga0212129_111089	0.282326	0.574552		Ga0212129_111089	0.29287	0.559705			Ga0212129_111089	0.221903	0.460455		Ga0212129_111089	0.24324	0.560909		Ga0212129_111089	0.467364	0.992064			Ga0212129_111089	0.599769	1.4328		Ga0212129_111089	0.612243	1.38		Ga0212129_111089	0.581137	1.35167
Ga0212129_11109	0.490604	1.78823		Ga0212129_11109	-0.0923368	-0.256772		Ga0212129_11109	0.501437	1.95149			Ga0212129_11109	0.30341	1.29263		Ga0212129_11109	0.475814	2.41919		Ga0212129_11109	0.315217	1.4952			Ga0212129_11109	0.359549	1.53014		Ga0212129_11109	0.307427	1.40919		Ga0212129_11109	0.258472	1.23726			Ga0212129_11109	0.266047	1.30662		Ga0212129_11109	0.353193	1.66408		Ga0212129_11109	0.222052	1.14271
Ga0212129_111090	0.165027	1.07648		Ga0212129_111090	0.0785922	0.440574		Ga0212129_111090	0.140919	0.826866			Ga0212129_111090	0.219606	1.61798		Ga0212129_111090	0.315955	2.21915		Ga0212129_111090	0.282408	1.92266			Ga0212129_111090	0.218456	1.61245		Ga0212129_111090	0.25738	1.76411		Ga0212129_111090	0.335624	2.36981			Ga0212129_111090	0.219793	1.5917		Ga0212129_111090	0.166407	1.12624		Ga0212129_111090	0.277194	2.06005
Ga0212129_111091	-0.795358	-3.0704		Ga0212129_111091	-0.577786	-2.09645		Ga0212129_111091	-0.992937	-3.88236			Ga0212129_111091	-0.993535	-4.32099		Ga0212129_111091	-0.787174	-3.75177		Ga0212129_111091	-0.599979	-3.00413			Ga0212129_111091	-0.823095	-3.7992		Ga0212129_111091	-0.763703	-3.49059		Ga0212129_111091	-0.716982	-3.74722			Ga0212129_111091	-0.875711	-4.06593		Ga0212129_111091	-0.55764	-2.70158		Ga0212129_111091	-0.803385	-3.71637
Ga0212129_111092	-1.41105	-4.99467		Ga0212129_111092	-1.54745	-4.52698		Ga0212129_111092	-0.935858	-3.44441			Ga0212129_111092	-0.786669	-3.60952		Ga0212129_111092	-1.1671	-5.06839		Ga0212129_111092	-0.653492	-2.75549			Ga0212129_111092	-1.88021	-7.26886		Ga0212129_111092	-1.45755	-6.53404		Ga0212129_111092	-1.18497	-5.14663			Ga0212129_111092	-1.08929	-5.03838		Ga0212129_111092	-0.627033	-2.92924		Ga0212129_111092	-0.612044	-2.47992
Ga0212129_111096	0.0220134	0.105524		Ga0212129_111096	-0.361365	-1.15013		Ga0212129_111096	-0.0980901	-0.474508			Ga0212129_111096	-0.0146863	-0.0739996		Ga0212129_111096	0.0800551	0.442667		Ga0212129_111096	0.0182118	0.0840358			Ga0212129_111096	0.0340431	0.176165		Ga0212129_111096	0.106903	0.598109		Ga0212129_111096	0.0807783	0.374003			Ga0212129_111096	0.0147685	0.0835178		Ga0212129_111096	-0.042896	-0.19862		Ga0212129_111096	-0.0586814	-0.295851
Ga0212129_111097	0.383108	1.61643		Ga0212129_111097	0.112276	0.425606		Ga0212129_111097	0.347637	1.51273			Ga0212129_111097	0.0404351	0.231685		Ga0212129_111097	0.241037	1.23047		Ga0212129_111097	0.155241	0.746075			Ga0212129_111097	0.165432	0.872854		Ga0212129_111097	0.129757	0.654046		Ga0212129_111097	0.110035	0.551636			Ga0212129_111097	0.130645	0.615739		Ga0212129_111097	0.133215	0.690541		Ga0212129_111097	0.174741	0.896615
Ga0212129_111098	-0.244526	-0.757781		Ga0212129_111098	-0.695407	-1.31844		Ga0212129_111098	-0.36852	-0.884596			Ga0212129_111098	-0.875939	-2.51506		Ga0212129_111098	-0.558721	-1.65443		Ga0212129_111098	-0.532859	-1.79664			Ga0212129_111098	-0.525918	-1.90262		Ga0212129_111098	-0.822683	-2.80723		Ga0212129_111098	-0.59818	-2.17694			Ga0212129_111098	-1.12218	-2.63802		Ga0212129_111098	-0.668379	-1.92241		Ga0212129_111098	-0.570513	-1.62998
Ga0212129_11110	-0.303273	-1.08056		Ga0212129_11110	-0.480179	-1.54719		Ga0212129_11110	-0.0219253	-0.0570225			Ga0212129_11110	-0.129684	-0.595462		Ga0212129_11110	-0.0436977	-0.18773		Ga0212129_11110	-0.189301	-0.725615			Ga0212129_11110	0.0761848	0.254673		Ga0212129_11110	-0.026423	-0.110863		Ga0212129_11110	-0.14365	-0.504059			Ga0212129_11110	-0.234749	-0.897457		Ga0212129_11110	-0.0222399	-0.0912769		Ga0212129_11110	-0.0552485	-0.211348
Ga0212129_111102	0.000606962	0.00302412		Ga0212129_111102	-0.331159	-0.876594		Ga0212129_111102	0.0397079	0.144164			Ga0212129_111102	-0.00045677	-0.00239405		Ga0212129_111102	-0.0747809	-0.344442		Ga0212129_111102	0.0226964	0.104405			Ga0212129_111102	-0.0383595	-0.189943		Ga0212129_111102	0.0550628	0.244343		Ga0212129_111102	0.0964042	0.47569			Ga0212129_111102	-0.0191848	-0.0813298		Ga0212129_111102	-0.0225397	-0.0942458		Ga0212129_111102	-0.0528969	-0.249783
Ga0212129_111103	-0.265025	-1.637		Ga0212129_111103	-0.558449	-2.65111		Ga0212129_111103	-0.352971	-1.79753			Ga0212129_111103	-0.443933	-3.32788		Ga0212129_111103	-0.495327	-3.60728		Ga0212129_111103	-0.296067	-2.12729			Ga0212129_111103	-0.48496	-3.41499		Ga0212129_111103	-0.312357	-2.34633		Ga0212129_111103	-0.311489	-2.3059			Ga0212129_111103	-0.400164	-2.91229		Ga0212129_111103	-0.400776	-2.93893		Ga0212129_111103	-0.402094	-2.89039
Ga0212129_111104	0.00518304	0.0291476		Ga0212129_111104	0.117545	0.63302		Ga0212129_111104	0.145153	0.717904			Ga0212129_111104	0.0730627	0.462622		Ga0212129_111104	-0.0356198	-0.197388		Ga0212129_111104	0.0927038	0.519314			Ga0212129_111104	0.0407673	0.23613		Ga0212129_111104	0.0582386	0.363221		Ga0212129_111104	0.0528474	0.316745			Ga0212129_111104	0.0266852	0.155193		Ga0212129_111104	0.0755766	0.45105		Ga0212129_111104	-0.026642	-0.166005
Ga0212129_111105	0.485375	1.41685		Ga0212129_111105	0.244153	0.497926		Ga0212129_111105	0.0066493	0.0146431			Ga0212129_111105	0.0248795	0.070151		Ga0212129_111105	0.140367	0.365513		Ga0212129_111105	0.130014	0.323187			Ga0212129_111105	0.0717907	0.161111		Ga0212129_111105	0.157988	0.305214		Ga0212129_111105	0.281949	0.685009			Ga0212129_111105	0.197467	0.572922		Ga0212129_111105	-0.0962701	-0.302113		Ga0212129_111105	0.100186	0.270286
Ga0212129_111107	0.213811	0.678695		Ga0212129_111107	-0.355286	-1.28632		Ga0212129_111107	0.397744	1.2231			Ga0212129_111107	0.0209167	0.0860108		Ga0212129_111107	0.0164671	0.0662653		Ga0212129_111107	0.0880298	0.365878			Ga0212129_111107	-0.0941085	-0.369352		Ga0212129_111107	0.253167	1.07414		Ga0212129_111107	0.159419	0.677593			Ga0212129_111107	0.0384209	0.144671		Ga0212129_111107	0.165008	0.761317		Ga0212129_111107	0.151946	0.558499
Ga0212129_111109	-0.949015	-4.45956		Ga0212129_111109	-2.09047	-7.85787		Ga0212129_111109	-3.05449	-7.22334			Ga0212129_111109	-1.3873	-7.67331		Ga0212129_111109	-1.85017	-10.1018		Ga0212129_111109	-1.98396	-10.1263			Ga0212129_111109	-0.562295	-3.73429		Ga0212129_111109	-0.987375	-5.49392		Ga0212129_111109	-1.46441	-8.72299			Ga0212129_111109	-1.47563	-8.40834		Ga0212129_111109	-2.05619	-9.53847		Ga0212129_111109	-2.05588	-9.64161
Ga0212129_11111	0.26441	1.17936		Ga0212129_11111	-0.0613863	-0.241541		Ga0212129_11111	-0.298074	-1.0564			Ga0212129_11111	0.14188	0.658405		Ga0212129_11111	0.176265	0.720089		Ga0212129_11111	0.154001	0.633148			Ga0212129_11111	0.151815	0.657497		Ga0212129_11111	0.274121	1.08614		Ga0212129_11111	0.0458753	0.18618			Ga0212129_11111	0.17075	0.711124		Ga0212129_11111	0.0957248	0.448209		Ga0212129_11111	0.284123	1.30346
Ga0212129_111110	0.00160724	0.00918552		Ga0212129_111110	-0.038235	-0.183393		Ga0212129_111110	-0.00762275	-0.0408262			Ga0212129_111110	0.0156642	0.107007		Ga0212129_111110	-0.0775998	-0.523671		Ga0212129_111110	-0.237111	-1.60337			Ga0212129_111110	0.021523	0.147731		Ga0212129_111110	-0.213527	-1.32577		Ga0212129_111110	-0.302876	-2.16852			Ga0212129_111110	-0.0752054	-0.477494		Ga0212129_111110	-0.0703202	-0.478204		Ga0212129_111110	-0.13902	-0.948061
Ga0212129_111113	-0.139363	-0.775204		Ga0212129_111113	-0.0718032	-0.365512		Ga0212129_111113	0.182623	0.835405			Ga0212129_111113	0.0445609	0.27423		Ga0212129_111113	-0.0686425	-0.40455		Ga0212129_111113	-0.00585581	-0.0345195			Ga0212129_111113	0.082259	0.487707		Ga0212129_111113	-0.0163566	-0.0966668		Ga0212129_111113	-0.0112195	-0.0700753			Ga0212129_111113	0.00627548	0.0347425		Ga0212129_111113	-0.0213767	-0.129502		Ga0212129_111113	0.0750918	0.478845
Ga0212129_111114	0.0294556	0.195979		Ga0212129_111114	-0.1488	-0.800647		Ga0212129_111114	-0.0702732	-0.424177			Ga0212129_111114	0.0928393	0.64003		Ga0212129_111114	0.190172	1.29415		Ga0212129_111114	0.211274	1.47689			Ga0212129_111114	0.156901	1.12512		Ga0212129_111114	0.266689	1.92548		Ga0212129_111114	0.236928	1.72466			Ga0212129_111114	0.175363	1.16103		Ga0212129_111114	0.166242	1.13829		Ga0212129_111114	0.189491	1.31825
Ga0212129_111117	0.219853	0.873438		Ga0212129_111117	-0.173839	-0.353166		Ga0212129_111117	0.181333	0.502942			Ga0212129_111117	0.152407	0.548698		Ga0212129_111117	0.259036	1.06852		Ga0212129_111117	0.207435	0.728317			Ga0212129_111117	0.245037	0.918859		Ga0212129_111117	0.174965	0.516889		Ga0212129_111117	0.0744237	0.266432			Ga0212129_111117	0.286923	1.03132		Ga0212129_111117	0.32377	1.66321		Ga0212129_111117	0.0971766	0.367001
Ga0212129_111118	0.314564	1.34885		Ga0212129_111118	-0.464192	-1.18883		Ga0212129_111118	0.430137	1.3852			Ga0212129_111118	0.332362	1.68311		Ga0212129_111118	0.108756	0.508775		Ga0212129_111118	0.09666	0.485417			Ga0212129_111118	0.000323157	0.00136577		Ga0212129_111118	0.0535692	0.215067		Ga0212129_111118	0.0793574	0.362327			Ga0212129_111118	0.117135	0.543201		Ga0212129_111118	0.107677	0.4693		Ga0212129_111118	0.253323	1.25481
Ga0212129_111119	0.36596	1.99335		Ga0212129_111119	-0.490079	-2.05589		Ga0212129_111119	-0.0827694	-0.431552			Ga0212129_111119	0.0673636	0.417671		Ga0212129_111119	0.0776874	0.493541		Ga0212129_111119	-0.209997	-1.31329			Ga0212129_111119	0.0248106	0.161377		Ga0212129_111119	-0.0132735	-0.0813037		Ga0212129_111119	-0.21838	-1.21366			Ga0212129_111119	0.20166	1.17342		Ga0212129_111119	-0.178576	-1.03923		Ga0212129_111119	-0.0637733	-0.394254
Ga0212129_111121	0.258074	1.86557		Ga0212129_111121	0.348386	2.19206		Ga0212129_111121	0.126019	0.858322			Ga0212129_111121	0.343268	2.70203		Ga0212129_111121	0.245186	1.90873		Ga0212129_111121	0.217878	1.71895			Ga0212129_111121	0.298872	2.35407		Ga0212129_111121	0.236095	1.76844		Ga0212129_111121	0.26633	2.08641			Ga0212129_111121	0.263623	2.02251		Ga0212129_111121	0.217312	1.71439		Ga0212129_111121	0.270127	2.10603
Ga0212129_111122	-0.0487022	-0.328433		Ga0212129_111122	0.0616135	0.409109		Ga0212129_111122	0.0434004	0.292124			Ga0212129_111122	0.0839985	0.627257		Ga0212129_111122	-0.0162949	-0.116696		Ga0212129_111122	-0.0754032	-0.522456			Ga0212129_111122	0.0065281	0.0458796		Ga0212129_111122	-0.101455	-0.716306		Ga0212129_111122	-0.0357322	-0.252904			Ga0212129_111122	0.0648729	0.458428		Ga0212129_111122	-0.00708479	-0.051531		Ga0212129_111122	-0.0208243	-0.151222
Ga0212129_111123	0.273129	0.825873		Ga0212129_111123	0.334133	1.25909		Ga0212129_111123	0.275207	0.963528			Ga0212129_111123	0.689444	2.17481		Ga0212129_111123	0.695545	2.19182		Ga0212129_111123	0.413146	1.28413			Ga0212129_111123	0.537494	2.01061		Ga0212129_111123	0.500734	1.82083		Ga0212129_111123	0.465642	1.68727			Ga0212129_111123	0.55703	2.21056		Ga0212129_111123	0.717007	2.9316		Ga0212129_111123	0.697283	3.05978
Ga0212129_111124	-0.165393	-1.06633		Ga0212129_111124	-0.529537	-2.81995		Ga0212129_111124	-0.438842	-2.43275			Ga0212129_111124	-0.382389	-2.65636		Ga0212129_111124	-0.411262	-2.82791		Ga0212129_111124	-0.384551	-2.63131			Ga0212129_111124	-0.316897	-2.23575		Ga0212129_111124	-0.381218	-2.70476		Ga0212129_111124	-0.469871	-3.34744			Ga0212129_111124	-0.259931	-1.79431		Ga0212129_111124	-0.338286	-2.39444		Ga0212129_111124	-0.564911	-4.1078
Ga0212129_111125	-0.0841953	-0.268853		Ga0212129_111125	-0.0389741	-0.129378		Ga0212129_111125	0.184101	0.635587			Ga0212129_111125	0.0435779	0.17202		Ga0212129_111125	-0.259834	-0.849444		Ga0212129_111125	-0.0465976	-0.178246			Ga0212129_111125	0.0354384	0.1299		Ga0212129_111125	0.0470536	0.18567		Ga0212129_111125	-0.0461124	-0.159671			Ga0212129_111125	-0.138191	-0.490794		Ga0212129_111125	-0.215982	-0.848568		Ga0212129_111125	-0.281179	-0.907923
Ga0212129_111126	-0.0188906	-0.061711		Ga0212129_111126	-0.440046	-1.20419		Ga0212129_111126	-0.0927782	-0.331965			Ga0212129_111126	-0.0701002	-0.283701		Ga0212129_111126	0.229329	0.966066		Ga0212129_111126	-0.132762	-0.625851			Ga0212129_111126	0.255991	1.22055		Ga0212129_111126	0.097748	0.432017		Ga0212129_111126	0.0592574	0.23019			Ga0212129_111126	0.163981	0.613958		Ga0212129_111126	0.240434	1.09303		Ga0212129_111126	0.225074	0.908038
Ga0212129_111127	0.116013	0.64158		Ga0212129_111127	0.226855	1.38038		Ga0212129_111127	0.20552	1.19978			Ga0212129_111127	0.138092	0.988864		Ga0212129_111127	0.191897	1.36235		Ga0212129_111127	0.249318	1.64118			Ga0212129_111127	0.225395	1.59932		Ga0212129_111127	0.178376	1.23015		Ga0212129_111127	0.164647	1.10772			Ga0212129_111127	0.221711	1.5051		Ga0212129_111127	0.256426	1.77357		Ga0212129_111127	0.24383	1.71856
Ga0212129_111128	0.0867538	0.457427		Ga0212129_111128	0.0518755	0.165542		Ga0212129_111128	0.0144529	0.0614923			Ga0212129_111128	0.292612	1.80704		Ga0212129_111128	0.251116	1.54924		Ga0212129_111128	0.23122	1.42503			Ga0212129_111128	0.32589	2.02702		Ga0212129_111128	0.213901	1.15015		Ga0212129_111128	0.404061	2.49362			Ga0212129_111128	0.249864	1.54386		Ga0212129_111128	0.315763	1.92929		Ga0212129_111128	0.137564	0.827555
Ga0212129_111130	0.132082	0.444751		Ga0212129_111130	0.0827885	0.246364		Ga0212129_111130	0.0513764	0.174593			Ga0212129_111130	0.348388	1.46775		Ga0212129_111130	0.0435234	0.179737		Ga0212129_111130	0.251782	0.891503			Ga0212129_111130	0.316292	1.19085		Ga0212129_111130	0.139144	0.494786		Ga0212129_111130	0.308155	1.24705			Ga0212129_111130	0.220747	0.766011		Ga0212129_111130	0.140506	0.440329		Ga0212129_111130	0.0472858	0.185835
Ga0212129_111131	0.213584	0.769086		Ga0212129_111131	0.256987	0.896636		Ga0212129_111131	0.793257	1.96721			Ga0212129_111131	0.292321	1.23009		Ga0212129_111131	0.382187	1.53275		Ga0212129_111131	0.0619354	0.234723			Ga0212129_111131	0.469463	1.89572		Ga0212129_111131	0.419052	1.39519		Ga0212129_111131	0.335778	1.42031			Ga0212129_111131	0.515768	2.16218		Ga0212129_111131	0.522995	2.19983		Ga0212129_111131	0.325901	1.3477
Ga0212129_111132	-0.0323578	-0.212386		Ga0212129_111132	-0.120256	-0.730361		Ga0212129_111132	-0.136023	-0.833571			Ga0212129_111132	0.173565	1.27118		Ga0212129_111132	-0.0467706	-0.35596		Ga0212129_111132	-0.0037359	-0.0281527			Ga0212129_111132	0.0881464	0.641643		Ga0212129_111132	0.0741749	0.552335		Ga0212129_111132	-0.0273838	-0.205476			Ga0212129_111132	0.0896759	0.641598		Ga0212129_111132	0.0676057	0.510583		Ga0212129_111132	-0.0190977	-0.141167
Ga0212129_111133	0.119216	0.422004		Ga0212129_111133	-0.17641	-0.707028		Ga0212129_111133	0.320558	1.16173			Ga0212129_111133	0.0743556	0.303237		Ga0212129_111133	-0.0147218	-0.0604608		Ga0212129_111133	-0.189364	-0.870535			Ga0212129_111133	0.110421	0.435662		Ga0212129_111133	0.156629	0.562036		Ga0212129_111133	0.133031	0.644708			Ga0212129_111133	0.064626	0.248519		Ga0212129_111133	0.0124507	0.0496125		Ga0212129_111133	-0.0498365	-0.208714
Ga0212129_111137	0.0766025	0.498603		Ga0212129_111137	0.183281	1.06308		Ga0212129_111137	-0.0425451	-0.261177			Ga0212129_111137	0.188988	1.323		Ga0212129_111137	0.0754124	0.523969		Ga0212129_111137	-0.067258	-0.447217			Ga0212129_111137	0.0813412	0.565645		Ga0212129_111137	0.0468005	0.317795		Ga0212129_111137	0.0761724	0.50176			Ga0212129_111137	0.100991	0.699978		Ga0212129_111137	0.00809013	0.0528589		Ga0212129_111137	0.0175255	0.123372
Ga0212129_111138	0.044329	0.29908		Ga0212129_111138	0.0174869	0.104572		Ga0212129_111138	-0.0753853	-0.42336			Ga0212129_111138	0.167938	1.19099		Ga0212129_111138	-0.00834572	-0.052334		Ga0212129_111138	-0.074226	-0.505812			Ga0212129_111138	0.0900859	0.613691		Ga0212129_111138	-0.0111867	-0.0756263		Ga0212129_111138	-0.0754098	-0.485364			Ga0212129_111138	-0.0296817	-0.194204		Ga0212129_111138	-0.0185332	-0.125718		Ga0212129_111138	-0.0208	-0.138319
Ga0212129_111139	0.468569	2.48044		Ga0212129_111139	0.322688	1.59889		Ga0212129_111139	0.0209625	0.117467			Ga0212129_111139	0.244442	1.47084		Ga0212129_111139	0.258303	1.60317		Ga0212129_111139	0.18124	1.00833			Ga0212129_111139	0.360763	2.14376		Ga0212129_111139	0.279497	1.69771		Ga0212129_111139	0.208339	1.23102			Ga0212129_111139	0.351646	2.00678		Ga0212129_111139	0.274872	1.75925		Ga0212129_111139	0.171489	1.02021
Ga0212129_11114	0.386009	0.853635		Ga0212129_11114	0.208086	0.544683		Ga0212129_11114	-0.355298	-0.590471			Ga0212129_11114	-0.032581	-0.107625		Ga0212129_11114	0.545239	2.05416		Ga0212129_11114	0.296539	1.10723			Ga0212129_11114	0.189426	0.69534		Ga0212129_11114	0.239386	0.864841		Ga0212129_11114	0.269906	1.00728			Ga0212129_11114	0.107284	0.396882		Ga0212129_11114	0.0933325	0.335594		Ga0212129_11114	0.179409	0.591302
Ga0212129_111140	-0.0176908	-0.0696922		Ga0212129_111140	-0.288489	-0.495689		Ga0212129_111140	-0.0536515	-0.134318			Ga0212129_111140	0.164631	0.55428		Ga0212129_111140	0.00208457	0.00696834		Ga0212129_111140	-0.0868024	-0.278692			Ga0212129_111140	-0.0456973	-0.176428		Ga0212129_111140	-0.0751719	-0.236882		Ga0212129_111140	0.0299623	0.083961			Ga0212129_111140	0.0870868	0.333917		Ga0212129_111140	-0.0757903	-0.252781		Ga0212129_111140	-0.33817	-1.34141
Ga0212129_111141	-0.014637	-0.044149		Ga0212129_111141	0.0962525	0.252213		Ga0212129_111141	0.193805	0.679186			Ga0212129_111141	0.316092	1.26369		Ga0212129_111141	0.351544	1.38536		Ga0212129_111141	0.197018	0.945166			Ga0212129_111141	0.245896	1.18954		Ga0212129_111141	0.151348	0.684319		Ga0212129_111141	0.294698	1.42152			Ga0212129_111141	0.338845	1.66048		Ga0212129_111141	0.316659	1.27303		Ga0212129_111141	0.292784	1.38329
Ga0212129_111144	-1.059	-1.5796		Ga0212129_111144	-1.10502	-1.32639		Ga0212129_111144	-0.650413	-0.74046			Ga0212129_111144	-0.468241	-1.22742		Ga0212129_111144	-0.321383	-0.945252		Ga0212129_111144	-0.696592	-1.86823			Ga0212129_111144	-0.099911	-0.277471		Ga0212129_111144	-0.483106	-1.29641		Ga0212129_111144	-0.580725	-1.63738			Ga0212129_111144	-0.395596	-1.16469		Ga0212129_111144	-0.604452	-1.76166		Ga0212129_111144	-0.172614	-0.490635
Ga0212129_11115	-0.0719478	-0.360694		Ga0212129_11115	0.106164	0.387869		Ga0212129_11115	0.00874006	0.0257502			Ga0212129_11115	0.0480755	0.231662		Ga0212129_11115	0.0744926	0.361368		Ga0212129_11115	0.0555816	0.295992			Ga0212129_11115	0.237291	1.29993		Ga0212129_11115	0.101595	0.55794		Ga0212129_11115	0.119545	0.695905			Ga0212129_11115	0.0274679	0.136544		Ga0212129_11115	0.19931	0.966266		Ga0212129_11115	0.0614983	0.355154
Ga0212129_111151	-0.149587	-0.296796		Ga0212129_111151	0.465666	1.94304		Ga0212129_111151	-0.0909067	-0.257285			Ga0212129_111151	0.179455	0.681505		Ga0212129_111151	-0.105856	-0.426499		Ga0212129_111151	0.169911	0.607326			Ga0212129_111151	-0.069779	-0.183674		Ga0212129_111151	-0.0852104	-0.251341		Ga0212129_111151	-0.0351017	-0.113202			Ga0212129_111151	0.351587	1.21153		Ga0212129_111151	-0.0214544	-0.067534		Ga0212129_111151	-0.0123998	-0.0358684
Ga0212129_111152	0.0673378	0.316353		Ga0212129_111152	-0.320152	-1.5453		Ga0212129_111152	-0.077209	-0.379755			Ga0212129_111152	-0.0411748	-0.23813		Ga0212129_111152	-0.102569	-0.591873		Ga0212129_111152	-0.257369	-1.49511			Ga0212129_111152	0.0484249	0.26132		Ga0212129_111152	-0.233439	-1.27164		Ga0212129_111152	-0.196978	-1.07498			Ga0212129_111152	-0.0923517	-0.492041		Ga0212129_111152	-0.143402	-0.832558		Ga0212129_111152	-0.123203	-0.717418
Ga0212129_111153	0.356783	2.09269		Ga0212129_111153	0.202644	0.981474		Ga0212129_111153	0.386622	1.70298			Ga0212129_111153	0.236696	1.38839		Ga0212129_111153	0.134014	0.831747		Ga0212129_111153	0.0630734	0.372515			Ga0212129_111153	0.217612	1.38018		Ga0212129_111153	0.134852	0.822012		Ga0212129_111153	0.136906	0.828444			Ga0212129_111153	0.136731	0.806765		Ga0212129_111153	0.138803	0.838354		Ga0212129_111153	0.134736	0.851342
Ga0212129_111154	0.163504	1.14214		Ga0212129_111154	0.0580536	0.378675		Ga0212129_111154	0.0835695	0.582305			Ga0212129_111154	0.0962705	0.760188		Ga0212129_111154	0.0360248	0.284658		Ga0212129_111154	-0.157055	-1.21121			Ga0212129_111154	0.13421	1.04751		Ga0212129_111154	-0.0279542	-0.215655		Ga0212129_111154	-0.0536306	-0.413243			Ga0212129_111154	0.0879125	0.666525		Ga0212129_111154	-0.000428932	-0.00328926		Ga0212129_111154	0.0955825	0.762502
Ga0212129_111155	0.274077	1.5453		Ga0212129_111155	-0.0658137	-0.380479		Ga0212129_111155	-0.0494178	-0.294529			Ga0212129_111155	0.165748	1.08897		Ga0212129_111155	0.117136	0.744856		Ga0212129_111155	0.0414222	0.257818			Ga0212129_111155	0.180443	1.13712		Ga0212129_111155	0.0976372	0.603756		Ga0212129_111155	0.063313	0.410087			Ga0212129_111155	0.151039	0.941366		Ga0212129_111155	0.005578	0.0324902		Ga0212129_111155	0.00591227	0.0374611
Ga0212129_111156	0.244497	1.0423		Ga0212129_111156	0.30968	1.31398		Ga0212129_111156	0.194569	0.865916			Ga0212129_111156	0.391217	2.15957		Ga0212129_111156	0.33159	1.87773		Ga0212129_111156	0.250105	1.42535			Ga0212129_111156	0.475595	2.43993		Ga0212129_111156	0.224218	1.11704		Ga0212129_111156	0.367129	1.80098			Ga0212129_111156	0.465967	2.36432		Ga0212129_111156	0.294793	1.61602		Ga0212129_111156	0.271076	1.45739
Ga0212129_111157	-0.0260886	-0.124708		Ga0212129_111157	0.0403851	0.133177		Ga0212129_111157	-0.114552	-0.515731			Ga0212129_111157	0.21253	1.2446		Ga0212129_111157	-0.0878613	-0.501561		Ga0212129_111157	-0.0782474	-0.448083			Ga0212129_111157	-0.0495645	-0.296144		Ga0212129_111157	-0.032486	-0.189476		Ga0212129_111157	-0.0961536	-0.538117			Ga0212129_111157	-0.00894977	-0.0526551		Ga0212129_111157	-0.117095	-0.646243		Ga0212129_111157	-0.0269554	-0.150074
Ga0212129_111159	-0.727744	-1.77949		Ga0212129_111159	0.521118	1.21521		Ga0212129_111159	-0.14463	-0.357707			Ga0212129_111159	-0.0780764	-0.221614		Ga0212129_111159	-0.462642	-1.17866		Ga0212129_111159	-0.378112	-1.05984			Ga0212129_111159	-0.38596	-1.08852		Ga0212129_111159	-0.487577	-1.34167		Ga0212129_111159	-0.390111	-1.17212			Ga0212129_111159	0.0193818	0.0599921		Ga0212129_111159	0.0466854	0.134032		Ga0212129_111159	-0.407599	-1.15232
Ga0212129_11116	0.0126507	0.0439629		Ga0212129_11116	0.418015	1.58921		Ga0212129_11116	0.190603	0.72031			Ga0212129_11116	0.161266	0.769933		Ga0212129_11116	0.486726	1.93291		Ga0212129_11116	0.324087	1.23714			Ga0212129_11116	0.198155	0.821066		Ga0212129_11116	0.167699	0.664804		Ga0212129_11116	0.432234	1.7495			Ga0212129_11116	0.196703	0.953219		Ga0212129_11116	0.277929	1.32371		Ga0212129_11116	0.236973	1.05678
Ga0212129_111160	0.0591604	0.100618		Ga0212129_111160	-0.316291	-0.530681		Ga0212129_111160	-0.362182	-0.59098			Ga0212129_111160	-0.237811	-0.563474		Ga0212129_111160	0.227402	0.752832		Ga0212129_111160	0.0551236	0.18523			Ga0212129_111160	0.291161	0.651028		Ga0212129_111160	-0.434198	-1.21686		Ga0212129_111160	-0.0604565	-0.126431			Ga0212129_111160	0.159615	0.326107		Ga0212129_111160	-0.133736	-0.336197		Ga0212129_111160	0.2121	0.545924
Ga0212129_111161	0.198187	1.22621		Ga0212129_111161	0.367142	1.91687		Ga0212129_111161	0.101698	0.534683			Ga0212129_111161	0.350595	2.26395		Ga0212129_111161	0.187651	1.07887		Ga0212129_111161	0.132267	0.819619			Ga0212129_111161	0.284177	1.79998		Ga0212129_111161	0.174579	1.08044		Ga0212129_111161	0.150622	0.941511			Ga0212129_111161	0.351999	2.17029		Ga0212129_111161	0.242795	1.57295		Ga0212129_111161	0.238994	1.54829
Ga0212129_111162	0.195819	0.964014		Ga0212129_111162	0.216901	0.937278		Ga0212129_111162	0.303115	1.49418			Ga0212129_111162	0.404501	2.39678		Ga0212129_111162	0.232393	1.23489		Ga0212129_111162	0.288115	1.57945			Ga0212129_111162	0.313238	1.65421		Ga0212129_111162	0.297543	1.54422		Ga0212129_111162	0.123994	0.640482			Ga0212129_111162	0.337863	1.71819		Ga0212129_111162	0.291127	1.68731		Ga0212129_111162	0.171527	0.970641
Ga0212129_111163	-0.108822	-0.474583		Ga0212129_111163	0.478151	1.98929		Ga0212129_111163	-0.042465	-0.157199			Ga0212129_111163	0.145462	0.797899		Ga0212129_111163	-0.0670433	-0.362184		Ga0212129_111163	-0.0777691	-0.41183			Ga0212129_111163	0.0615651	0.353594		Ga0212129_111163	-0.112199	-0.621388		Ga0212129_111163	-0.111765	-0.578287			Ga0212129_111163	-0.00709852	-0.0338126		Ga0212129_111163	0.0574581	0.329795		Ga0212129_111163	-0.171714	-0.921008
Ga0212129_111164	0.0552586	0.272706		Ga0212129_111164	0.176042	0.771626		Ga0212129_111164	0.119152	0.537758			Ga0212129_111164	0.10619	0.578506		Ga0212129_111164	0.0447167	0.25027		Ga0212129_111164	0.0390873	0.190364			Ga0212129_111164	0.111774	0.575216		Ga0212129_111164	-0.0202716	-0.104958		Ga0212129_111164	-0.104619	-0.577928			Ga0212129_111164	0.109981	0.533352		Ga0212129_111164	-0.0178468	-0.0902204		Ga0212129_111164	-0.0115409	-0.0663153
Ga0212129_111165	-0.0617687	-0.315114		Ga0212129_111165	-0.23556	-0.981521		Ga0212129_111165	0.301524	1.50306			Ga0212129_111165	0.211559	1.27964		Ga0212129_111165	0.073813	0.42703		Ga0212129_111165	-0.0241808	-0.14055			Ga0212129_111165	0.123717	0.737195		Ga0212129_111165	0.0181377	0.103483		Ga0212129_111165	0.0182672	0.107632			Ga0212129_111165	-0.0195756	-0.10128		Ga0212129_111165	0.0973474	0.610222		Ga0212129_111165	-0.117667	-0.679197
Ga0212129_111166	0.119251	0.693298		Ga0212129_111166	0.146729	0.709219		Ga0212129_111166	0.289087	1.5795			Ga0212129_111166	0.293275	1.86206		Ga0212129_111166	0.190394	1.2134		Ga0212129_111166	0.135152	0.809314			Ga0212129_111166	0.254366	1.59097		Ga0212129_111166	0.0730202	0.461028		Ga0212129_111166	0.0176538	0.10633			Ga0212129_111166	0.2435	1.46292		Ga0212129_111166	0.114435	0.703722		Ga0212129_111166	0.12162	0.748402
Ga0212129_111167	0.129494	0.706539		Ga0212129_111167	-0.187422	-1.13774		Ga0212129_111167	-0.166774	-0.899053			Ga0212129_111167	0.221179	1.36425		Ga0212129_111167	0.0732293	0.43471		Ga0212129_111167	0.0916033	0.549569			Ga0212129_111167	0.209681	1.31368		Ga0212129_111167	0.0495923	0.305789		Ga0212129_111167	0.124345	0.765623			Ga0212129_111167	0.228908	1.36941		Ga0212129_111167	0.0666301	0.417474		Ga0212129_111167	0.0207301	0.124915
Ga0212129_111168	0.084629	0.441639		Ga0212129_111168	0.04474	0.209901		Ga0212129_111168	-0.188767	-0.945191			Ga0212129_111168	0.138637	0.927671		Ga0212129_111168	0.0548331	0.339881		Ga0212129_111168	0.0605537	0.367733			Ga0212129_111168	0.0667661	0.41899		Ga0212129_111168	-0.050258	-0.293041		Ga0212129_111168	0.0484679	0.298483			Ga0212129_111168	0.122738	0.723015		Ga0212129_111168	0.130039	0.835369		Ga0212129_111168	0.0220075	0.142032
Ga0212129_111169	-0.077683	-0.21356		Ga0212129_111169	-0.371894	-1.25808		Ga0212129_111169	-0.261193	-0.863174			Ga0212129_111169	-0.0936011	-0.421978		Ga0212129_111169	-0.411544	-1.57569		Ga0212129_111169	-0.299101	-1.25491			Ga0212129_111169	-0.207355	-0.912649		Ga0212129_111169	-0.41651	-1.68359		Ga0212129_111169	-0.360402	-1.61249			Ga0212129_111169	-0.238678	-0.850952		Ga0212129_111169	-0.393854	-1.58286		Ga0212129_111169	-0.213622	-0.924358
Ga0212129_11117	-0.512437	-1.98211		Ga0212129_11117	-0.734401	-2.44985		Ga0212129_11117	-0.611051	-2.2184			Ga0212129_11117	-0.600174	-2.79654		Ga0212129_11117	-0.454153	-2.07202		Ga0212129_11117	-0.402794	-1.8217			Ga0212129_11117	-0.52986	-2.27667		Ga0212129_11117	-0.730349	-3.20924		Ga0212129_11117	-0.501165	-2.42319			Ga0212129_11117	-0.656113	-3.09523		Ga0212129_11117	-0.410484	-2.00424		Ga0212129_11117	-0.443878	-2.12209
Ga0212129_111170	-0.112503	-0.699561		Ga0212129_111170	-0.2055	-1.09674		Ga0212129_111170	-0.117878	-0.688098			Ga0212129_111170	0.10029	0.741046		Ga0212129_111170	0.105835	0.711313		Ga0212129_111170	0.0741044	0.519871			Ga0212129_111170	0.21666	1.56978		Ga0212129_111170	0.0410978	0.294621		Ga0212129_111170	-0.0159581	-0.110135			Ga0212129_111170	0.199013	1.5139		Ga0212129_111170	0.090071	0.636472		Ga0212129_111170	0.0544847	0.383077
Ga0212129_111171	0.234917	0.740905		Ga0212129_111171	-0.230941	-0.745662		Ga0212129_111171	0.00930494	0.0340729			Ga0212129_111171	0.323616	1.34456		Ga0212129_111171	0.361063	1.45815		Ga0212129_111171	0.243279	1.02498			Ga0212129_111171	0.327585	1.33917		Ga0212129_111171	0.297663	1.30581		Ga0212129_111171	0.280118	1.23976			Ga0212129_111171	0.420213	1.91496		Ga0212129_111171	0.371754	1.78554		Ga0212129_111171	0.301561	1.2935
Ga0212129_111172	0.106137	0.496358		Ga0212129_111172	-0.315245	-1.46072		Ga0212129_111172	-0.226305	-1.11022			Ga0212129_111172	-0.0960747	-0.549911		Ga0212129_111172	-0.16549	-0.913453		Ga0212129_111172	-0.275726	-1.44512			Ga0212129_111172	-0.278652	-1.38437		Ga0212129_111172	-0.257077	-1.35315		Ga0212129_111172	-0.275872	-1.4819			Ga0212129_111172	-0.0561936	-0.337566		Ga0212129_111172	-0.120911	-0.66		Ga0212129_111172	-0.133217	-0.763808
Ga0212129_111173	-0.0639203	-0.397238		Ga0212129_111173	-0.295714	-1.60557		Ga0212129_111173	0.05648	0.32525			Ga0212129_111173	-0.0228811	-0.163384		Ga0212129_111173	-0.0698475	-0.471137		Ga0212129_111173	-0.11501	-0.763153			Ga0212129_111173	-0.0474787	-0.342163		Ga0212129_111173	-0.125761	-0.824132		Ga0212129_111173	-0.102994	-0.692024			Ga0212129_111173	0.0841088	0.566438		Ga0212129_111173	0.0343146	0.223844		Ga0212129_111173	-0.125967	-0.854623
Ga0212129_111174	0.24555	0.921785		Ga0212129_111174	0.0480974	0.207728		Ga0212129_111174	0.489851	1.73691			Ga0212129_111174	0.0334836	0.151313		Ga0212129_111174	-0.0824358	-0.390163		Ga0212129_111174	0.116555	0.510753			Ga0212129_111174	0.0758309	0.336319		Ga0212129_111174	0.111017	0.46637		Ga0212129_111174	-0.00075425	-0.00352824			Ga0212129_111174	0.225293	0.9215		Ga0212129_111174	0.0387565	0.181396		Ga0212129_111174	0.0658968	0.273691
Ga0212129_111175	0.359213	1.50786		Ga0212129_111175	-0.408724	-1.07322		Ga0212129_111175	-0.252585	-0.686888			Ga0212129_111175	-0.0158012	-0.0453371		Ga0212129_111175	-0.341522	-0.953177		Ga0212129_111175	-0.184958	-0.612291			Ga0212129_111175	-0.0959885	-0.262495		Ga0212129_111175	-0.479142	-1.31141		Ga0212129_111175	-0.293719	-0.810707			Ga0212129_111175	-0.0487225	-0.154019		Ga0212129_111175	-0.559849	-1.62227		Ga0212129_111175	-0.199585	-0.504278
Ga0212129_111176	0.217695	1.29922		Ga0212129_111176	0.170836	0.785437		Ga0212129_111176	0.0972185	0.498835			Ga0212129_111176	0.141235	0.963843		Ga0212129_111176	0.107531	0.642704		Ga0212129_111176	-0.0183299	-0.125477			Ga0212129_111176	0.171833	1.13575		Ga0212129_111176	0.105372	0.698136		Ga0212129_111176	0.0222086	0.149935			Ga0212129_111176	0.244364	1.64233		Ga0212129_111176	0.0545285	0.377018		Ga0212129_111176	-0.0135244	-0.0922451
Ga0212129_111177	0.297453	1.84406		Ga0212129_111177	0.344663	1.70201		Ga0212129_111177	0.0150088	0.0763669			Ga0212129_111177	0.299448	1.88595		Ga0212129_111177	0.129246	0.769962		Ga0212129_111177	0.119452	0.694605			Ga0212129_111177	0.220434	1.27556		Ga0212129_111177	0.173084	1.07567		Ga0212129_111177	0.0548905	0.329698			Ga0212129_111177	0.274158	1.63753		Ga0212129_111177	0.140729	0.864886		Ga0212129_111177	0.184464	1.05233
Ga0212129_111178	0.480629	2.25792		Ga0212129_111178	0.0443087	0.214469		Ga0212129_111178	-0.178212	-0.708784			Ga0212129_111178	0.40149	2.38373		Ga0212129_111178	0.204476	1.17963		Ga0212129_111178	0.0545158	0.322518			Ga0212129_111178	0.244809	1.35708		Ga0212129_111178	0.119401	0.609948		Ga0212129_111178	0.0741982	0.416422			Ga0212129_111178	0.233086	1.27474		Ga0212129_111178	0.179433	1.00385		Ga0212129_111178	0.248588	1.58731
Ga0212129_111179	0.377652	1.33172		Ga0212129_111179	0.52114	1.7887		Ga0212129_111179	0.498777	1.57636			Ga0212129_111179	0.5453	2.24297		Ga0212129_111179	0.381548	1.5928		Ga0212129_111179	0.27241	1.18475			Ga0212129_111179	0.371658	1.80816		Ga0212129_111179	0.325376	1.39626		Ga0212129_111179	0.236782	0.995765			Ga0212129_111179	0.390216	1.5264		Ga0212129_111179	0.525915	2.53192		Ga0212129_111179	0.399882	1.64605
Ga0212129_111181	0.322503	1.81043		Ga0212129_111181	0.141223	0.69379		Ga0212129_111181	-0.0229163	-0.110627			Ga0212129_111181	0.361639	1.8606		Ga0212129_111181	0.304339	1.71327		Ga0212129_111181	0.0679895	0.378071			Ga0212129_111181	0.138557	0.91556		Ga0212129_111181	0.12738	0.689947		Ga0212129_111181	0.141033	0.830867			Ga0212129_111181	0.273157	1.69494		Ga0212129_111181	0.179971	1.05845		Ga0212129_111181	0.128188	0.7271
Ga0212129_111183	-0.26851	-0.822703		Ga0212129_111183	-0.33448	-1.11563		Ga0212129_111183	0.183142	0.581779			Ga0212129_111183	0.276375	1.2797		Ga0212129_111183	0.0905132	0.416043		Ga0212129_111183	-0.135401	-0.613779			Ga0212129_111183	0.0592703	0.272859		Ga0212129_111183	-0.128206	-0.56658		Ga0212129_111183	0.160657	0.742341			Ga0212129_111183	0.0590196	0.238181		Ga0212129_111183	0.184945	0.840046		Ga0212129_111183	0.102641	0.460675
Ga0212129_111186	0.351149	1.49131		Ga0212129_111186	0.340796	1.46477		Ga0212129_111186	0.337737	1.35995			Ga0212129_111186	0.435499	2.18056		Ga0212129_111186	0.380464	1.90459		Ga0212129_111186	0.119779	0.591173			Ga0212129_111186	0.311803	1.53098		Ga0212129_111186	0.149265	0.720371		Ga0212129_111186	0.282	1.40494			Ga0212129_111186	0.276565	1.39095		Ga0212129_111186	0.147806	0.716457		Ga0212129_111186	0.329935	1.61304
Ga0212129_11119	-3.30448	-3.12547		Ga0212129_11119	-3.72606	-2.53614		Ga0212129_11119	-1.82459	-2.02365			Ga0212129_11119	-3.82821	-4.95259		Ga0212129_11119	-4.2822	-4.87708		Ga0212129_11119	-2.94869	-5.72079			Ga0212129_11119	-3.50333	-5.72489		Ga0212129_11119	-3.66811	-4.74548		Ga0212129_11119	-3.30265	-5.68653			Ga0212129_11119	-3.88552	-5.5315		Ga0212129_11119	-3.85905	-4.99249		Ga0212129_11119	-3.30811	-5.08017
Ga0212129_111192	-0.380146	-0.665425		Ga0212129_111192	-0.60438	-0.547137		Ga0212129_111192	-0.504924	-1.02308			Ga0212129_111192	-0.434821	-1.63706		Ga0212129_111192	-0.5036	-1.06844		Ga0212129_111192	-0.800214	-1.64634			Ga0212129_111192	-0.795635	-1.94222		Ga0212129_111192	-0.614256	-1.51412		Ga0212129_111192	-0.654086	-2.03218			Ga0212129_111192	-0.985088	-2.08898		Ga0212129_111192	-0.732148	-2.00289		Ga0212129_111192	-0.669221	-1.68118
Ga0212129_111193	-0.36366	-1.55785		Ga0212129_111193	-0.844932	-2.75997		Ga0212129_111193	-0.495158	-2.02999			Ga0212129_111193	-0.445106	-1.77774		Ga0212129_111193	-0.608127	-1.88468		Ga0212129_111193	-0.602147	-2.57336			Ga0212129_111193	-0.465202	-1.85205		Ga0212129_111193	-0.523057	-2.24882		Ga0212129_111193	-0.707249	-2.8235			Ga0212129_111193	-0.235079	-0.872556		Ga0212129_111193	-0.466762	-1.75532		Ga0212129_111193	-0.423658	-1.90719
Ga0212129_111195	0.227634	0.70148		Ga0212129_111195	0.24932	0.506861		Ga0212129_111195	-0.106193	-0.362143			Ga0212129_111195	0.0701418	0.272583		Ga0212129_111195	0.0729404	0.257878		Ga0212129_111195	-0.153582	-0.488915			Ga0212129_111195	0.215899	0.705195		Ga0212129_111195	-0.078465	-0.341338		Ga0212129_111195	-0.0900205	-0.314412			Ga0212129_111195	-0.0875734	-0.267807		Ga0212129_111195	-0.000689487	-0.0021012		Ga0212129_111195	-0.0864134	-0.303439
Ga0212129_111197	0.221667	1.40605		Ga0212129_111197	0.2141	1.20191		Ga0212129_111197	0.282214	1.85726			Ga0212129_111197	0.264807	1.93299		Ga0212129_111197	0.186082	1.30013		Ga0212129_111197	0.242428	1.74835			Ga0212129_111197	0.333609	2.34504		Ga0212129_111197	0.246118	1.76672		Ga0212129_111197	0.246317	1.79618			Ga0212129_111197	0.281073	1.96107		Ga0212129_111197	0.224566	1.65229		Ga0212129_111197	0.20995	1.5338
Ga0212129_111199	-0.428756	-0.896085		Ga0212129_111199	-0.321786	-0.970317		Ga0212129_111199	-0.118918	-0.365382			Ga0212129_111199	0.22631	0.811952		Ga0212129_111199	0.227753	0.946991		Ga0212129_111199	-0.0603082	-0.239737			Ga0212129_111199	-0.106694	-0.36526		Ga0212129_111199	0.10848	0.406774		Ga0212129_111199	0.0361679	0.11497			Ga0212129_111199	0.0379516	0.158309		Ga0212129_111199	0.103802	0.351694		Ga0212129_111199	-0.0469742	-0.179617
Ga0212129_111200	0.206235	0.919023		Ga0212129_111200	-0.0322416	-0.149535		Ga0212129_111200	0.228914	0.928403			Ga0212129_111200	0.198594	1.034		Ga0212129_111200	0.134015	0.69587		Ga0212129_111200	0.137993	0.661109			Ga0212129_111200	0.137357	0.684611		Ga0212129_111200	0.0446469	0.221739		Ga0212129_111200	0.0731767	0.440287			Ga0212129_111200	0.161556	0.787093		Ga0212129_111200	0.129999	0.66305		Ga0212129_111200	0.068131	0.362266
Ga0212129_111201	-0.338089	-1.42555		Ga0212129_111201	-1.04894	-3.4441		Ga0212129_111201	-1.02699	-3.89551			Ga0212129_111201	-0.446773	-2.3918		Ga0212129_111201	-0.471536	-2.54639		Ga0212129_111201	-0.548531	-2.89102			Ga0212129_111201	-0.609149	-2.83084		Ga0212129_111201	-0.481781	-2.57384		Ga0212129_111201	-0.56421	-2.74666			Ga0212129_111201	-0.451352	-2.28296		Ga0212129_111201	-0.47675	-2.25514		Ga0212129_111201	-0.474309	-2.57367
Ga0212129_111202	-1.09968	-2.00989		Ga0212129_111202	-0.153661	-0.303357		Ga0212129_111202	-1.28586	-2.41591			Ga0212129_111202	-0.448156	-1.05816		Ga0212129_111202	-0.700002	-1.79288		Ga0212129_111202	-0.700011	-1.66168			Ga0212129_111202	-0.637921	-1.44726		Ga0212129_111202	-0.822009	-1.98422		Ga0212129_111202	-0.70105	-1.68745			Ga0212129_111202	-0.471286	-0.999813		Ga0212129_111202	-0.803157	-1.63619		Ga0212129_111202	-0.593785	-1.58968
Ga0212129_111206	-0.88782	-3.10735		Ga0212129_111206	-0.395223	-0.893128		Ga0212129_111206	-0.711804	-1.96718			Ga0212129_111206	-0.517761	-2.03234		Ga0212129_111206	-0.296188	-0.979644		Ga0212129_111206	-0.483774	-1.69376			Ga0212129_111206	-0.141968	-0.624706		Ga0212129_111206	-0.33367	-1.19448		Ga0212129_111206	-0.718476	-2.16706			Ga0212129_111206	-0.427804	-1.53336		Ga0212129_111206	-0.556398	-1.96035		Ga0212129_111206	-0.424681	-1.69493
Ga0212129_111207	-0.746769	-2.974		Ga0212129_111207	-0.48125	-1.28196		Ga0212129_111207	0.0561048	0.166365			Ga0212129_111207	-0.219309	-1.03867		Ga0212129_111207	-0.22419	-1.12434		Ga0212129_111207	0.01556	0.0550905			Ga0212129_111207	-0.385019	-1.94298		Ga0212129_111207	-0.189796	-0.712938		Ga0212129_111207	-0.134405	-0.686916			Ga0212129_111207	-0.223746	-1.10532		Ga0212129_111207	-0.150889	-0.704388		Ga0212129_111207	-0.393421	-1.57768
Ga0212129_111208	0.161771	1.02835		Ga0212129_111208	-0.00495689	-0.0297974		Ga0212129_111208	-0.0270881	-0.153211			Ga0212129_111208	0.21831	1.56825		Ga0212129_111208	0.0561716	0.392297		Ga0212129_111208	-0.0117191	-0.078092			Ga0212129_111208	0.0730718	0.508443		Ga0212129_111208	0.0463495	0.316789		Ga0212129_111208	0.0535396	0.370627			Ga0212129_111208	0.132655	0.944843		Ga0212129_111208	0.0468937	0.326093		Ga0212129_111208	0.0833992	0.585014
Ga0212129_111209	-0.131052	-0.292199		Ga0212129_111209	-0.376886	-0.692598		Ga0212129_111209	-0.467142	-1.1462			Ga0212129_111209	-0.329076	-1.11388		Ga0212129_111209	-0.078089	-0.211918		Ga0212129_111209	-0.671131	-2.24434			Ga0212129_111209	-0.274172	-0.926271		Ga0212129_111209	-0.272771	-0.760419		Ga0212129_111209	-0.184841	-0.488889			Ga0212129_111209	-0.167516	-0.595638		Ga0212129_111209	-0.0279938	-0.086314		Ga0212129_111209	-0.0635492	-0.217766
Ga0212129_111210	1.06444	3.35026		Ga0212129_111210	0.328768	1.07785		Ga0212129_111210	0.355079	0.77841			Ga0212129_111210	0.247974	0.928275		Ga0212129_111210	0.408483	1.63027		Ga0212129_111210	0.363015	1.35621			Ga0212129_111210	0.469922	1.88886		Ga0212129_111210	0.412997	1.54047		Ga0212129_111210	0.207337	0.723785			Ga0212129_111210	0.122141	0.48604		Ga0212129_111210	0.377845	1.20778		Ga0212129_111210	0.339198	1.31863
Ga0212129_111211	-0.181681	-1.09531		Ga0212129_111211	-0.009697	-0.0529732		Ga0212129_111211	-0.162335	-0.887372			Ga0212129_111211	0.041217	0.278162		Ga0212129_111211	-0.090002	-0.583755		Ga0212129_111211	-0.0895703	-0.557746			Ga0212129_111211	0.017153	0.115268		Ga0212129_111211	-0.112088	-0.70526		Ga0212129_111211	-0.0738815	-0.484033			Ga0212129_111211	0.0671487	0.466309		Ga0212129_111211	-0.0708777	-0.464285		Ga0212129_111211	-0.109833	-0.775322
Ga0212129_111212	0.218673	1.31718		Ga0212129_111212	0.0468805	0.240744		Ga0212129_111212	0.335221	1.99986			Ga0212129_111212	0.209827	1.48343		Ga0212129_111212	0.195104	1.38384		Ga0212129_111212	0.158592	1.17013			Ga0212129_111212	0.380102	2.86365		Ga0212129_111212	0.214429	1.51499		Ga0212129_111212	0.179003	1.30706			Ga0212129_111212	0.352605	2.55396		Ga0212129_111212	0.17102	1.25663		Ga0212129_111212	0.252866	1.77817
Ga0212129_111213	-0.148151	-0.672546		Ga0212129_111213	-0.435746	-1.98439		Ga0212129_111213	-0.193776	-0.938356			Ga0212129_111213	-0.213429	-1.21349		Ga0212129_111213	-0.36211	-2.13075		Ga0212129_111213	-0.311685	-1.77187			Ga0212129_111213	-0.206173	-1.29047		Ga0212129_111213	-0.276282	-1.53368		Ga0212129_111213	-0.334283	-2.0043			Ga0212129_111213	-0.196109	-1.13274		Ga0212129_111213	-0.303149	-1.62005		Ga0212129_111213	-0.279406	-1.62137
Ga0212129_111214	0.0760861	0.436525		Ga0212129_111214	-0.198145	-0.870868		Ga0212129_111214	-0.0567652	-0.312423			Ga0212129_111214	0.151408	1.00749		Ga0212129_111214	0.0357303	0.226478		Ga0212129_111214	0.0494527	0.314826			Ga0212129_111214	0.0928072	0.56053		Ga0212129_111214	0.0101342	0.0633149		Ga0212129_111214	0.0191096	0.116657			Ga0212129_111214	0.0387903	0.243454		Ga0212129_111214	0.00931737	0.0616706		Ga0212129_111214	0.155415	0.999717
Ga0212129_111216	-2.42297	-6.21337		Ga0212129_111216	-3.05864	-5.34899		Ga0212129_111216	-2.47889	-4.85313			Ga0212129_111216	-2.33309	-7.65049		Ga0212129_111216	-2.34607	-8.7622		Ga0212129_111216	-2.55266	-9.24219			Ga0212129_111216	-2.26962	-8.9886		Ga0212129_111216	-2.86069	-8.98332		Ga0212129_111216	-3.05033	-9.69386			Ga0212129_111216	-2.52228	-9.35808		Ga0212129_111216	-3.63687	-8.07033		Ga0212129_111216	-2.662	-8.83162
Ga0212129_111217	-0.19445	-1.02526		Ga0212129_111217	0.243098	1.15651		Ga0212129_111217	0.15929	0.904803			Ga0212129_111217	0.0940633	0.55539		Ga0212129_111217	0.145347	0.839387		Ga0212129_111217	0.063909	0.373516			Ga0212129_111217	0.0699418	0.412336		Ga0212129_111217	0.0912281	0.508474		Ga0212129_111217	0.074595	0.445251			Ga0212129_111217	0.119646	0.682756		Ga0212129_111217	0.154534	0.953338		Ga0212129_111217	0.18403	1.09245
Ga0212129_111218	0.383719	1.63057		Ga0212129_111218	-0.165177	-0.753166		Ga0212129_111218	0.272575	1.23395			Ga0212129_111218	0.196025	1.0333		Ga0212129_111218	0.125277	0.584077		Ga0212129_111218	0.131913	0.581409			Ga0212129_111218	0.15862	0.739346		Ga0212129_111218	0.203963	0.94248		Ga0212129_111218	0.203786	0.951047			Ga0212129_111218	0.129832	0.554233		Ga0212129_111218	0.0267574	0.113766		Ga0212129_111218	0.177776	0.802994
Ga0212129_111219	-0.174475	-0.694335		Ga0212129_111219	-0.198862	-0.782906		Ga0212129_111219	-0.42379	-1.20469			Ga0212129_111219	-0.0686437	-0.372778		Ga0212129_111219	-0.107187	-0.555313		Ga0212129_111219	-0.0731027	-0.372499			Ga0212129_111219	-0.180626	-0.96733		Ga0212129_111219	-0.295529	-1.54855		Ga0212129_111219	-0.131334	-0.715161			Ga0212129_111219	0.187851	1.04993		Ga0212129_111219	0.00815662	0.0438504		Ga0212129_111219	-0.193837	-1.02212
Ga0212129_111220	-0.149433	-0.623232		Ga0212129_111220	0.00649036	0.0194458		Ga0212129_111220	0.103809	0.520662			Ga0212129_111220	0.00322526	0.014656		Ga0212129_111220	0.113965	0.495558		Ga0212129_111220	0.0269392	0.122359			Ga0212129_111220	0.0520682	0.236078		Ga0212129_111220	0.0428091	0.206784		Ga0212129_111220	-0.139572	-0.696147			Ga0212129_111220	0.0766297	0.329563		Ga0212129_111220	-0.0861482	-0.378437		Ga0212129_111220	-0.0367834	-0.177971
Ga0212129_111221	-0.0886395	-0.345707		Ga0212129_111221	-0.237137	-0.740933		Ga0212129_111221	0.300976	0.93837			Ga0212129_111221	-0.0247367	-0.124718		Ga0212129_111221	0.0111972	0.0502776		Ga0212129_111221	-0.0849293	-0.411357			Ga0212129_111221	-0.0984248	-0.493915		Ga0212129_111221	-0.0248418	-0.117653		Ga0212129_111221	-0.121351	-0.490143			Ga0212129_111221	0.103346	0.494366		Ga0212129_111221	-0.134098	-0.717387		Ga0212129_111221	-0.0712139	-0.286666
Ga0212129_111223	-0.0837151	-0.422265		Ga0212129_111223	0.0250856	0.10112		Ga0212129_111223	0.12352	0.58478			Ga0212129_111223	0.200675	1.06274		Ga0212129_111223	0.176422	0.950456		Ga0212129_111223	0.153051	0.783709			Ga0212129_111223	0.145506	0.806922		Ga0212129_111223	0.298753	1.56716		Ga0212129_111223	0.152935	0.789545			Ga0212129_111223	0.170667	0.790447		Ga0212129_111223	0.152191	0.863957		Ga0212129_111223	0.160562	0.789658
Ga0212129_111224	0.0227505	0.142986		Ga0212129_111224	0.312568	1.77137		Ga0212129_111224	-0.0713106	-0.403058			Ga0212129_111224	0.140642	1.04976		Ga0212129_111224	0.148783	1.10364		Ga0212129_111224	0.102034	0.695831			Ga0212129_111224	0.147538	1.04846		Ga0212129_111224	0.12053	0.863349		Ga0212129_111224	0.0445501	0.311897			Ga0212129_111224	0.0821877	0.574847		Ga0212129_111224	0.133235	0.941188		Ga0212129_111224	0.0426966	0.296342
Ga0212129_111225	-0.217421	-1.32334		Ga0212129_111225	-0.00789214	-0.04195		Ga0212129_111225	0.0158144	0.0913901			Ga0212129_111225	-0.0368622	-0.243064		Ga0212129_111225	0.0784585	0.520357		Ga0212129_111225	-0.164156	-1.01921			Ga0212129_111225	-0.0270871	-0.182367		Ga0212129_111225	-0.0779925	-0.497344		Ga0212129_111225	-0.128509	-0.838351			Ga0212129_111225	-0.121509	-0.734745		Ga0212129_111225	-0.125148	-0.863236		Ga0212129_111225	-0.0572698	-0.354136
Ga0212129_111226	0.0486314	0.225259		Ga0212129_111226	-0.0584765	-0.301928		Ga0212129_111226	-0.0639887	-0.364676			Ga0212129_111226	0.00270562	0.0176262		Ga0212129_111226	-0.0019018	-0.01164		Ga0212129_111226	-0.0846942	-0.531679			Ga0212129_111226	-0.0497263	-0.316343		Ga0212129_111226	0.0291591	0.182402		Ga0212129_111226	-0.191801	-1.16897			Ga0212129_111226	-0.0555805	-0.349733		Ga0212129_111226	0.0210967	0.143014		Ga0212129_111226	0.0327085	0.206593
Ga0212129_111227	-0.152117	-1.19782		Ga0212129_111227	-0.0442789	-0.333241		Ga0212129_111227	-0.00980323	-0.0760828			Ga0212129_111227	0.054728	0.478632		Ga0212129_111227	0.042973	0.362678		Ga0212129_111227	0.0652047	0.55292			Ga0212129_111227	0.0104926	0.090251		Ga0212129_111227	0.0391845	0.335519		Ga0212129_111227	0.0231804	0.194045			Ga0212129_111227	0.0749302	0.631684		Ga0212129_111227	0.00339268	0.0284592		Ga0212129_111227	0.0857462	0.722251
Ga0212129_111229	0.239881	1.25858		Ga0212129_111229	-0.10089	-0.336599		Ga0212129_111229	-0.380573	-1.34023			Ga0212129_111229	0.114418	0.631563		Ga0212129_111229	0.0789662	0.443328		Ga0212129_111229	0.00202817	0.0119152			Ga0212129_111229	0.140215	0.88945		Ga0212129_111229	0.1761	1.10554		Ga0212129_111229	0.0856762	0.522399			Ga0212129_111229	0.113932	0.675425		Ga0212129_111229	0.0627041	0.36721		Ga0212129_111229	0.186293	1.004
Ga0212129_111230	-0.0173461	-0.106287		Ga0212129_111230	-0.122341	-0.741555		Ga0212129_111230	-0.0356537	-0.201592			Ga0212129_111230	0.0753515	0.534131		Ga0212129_111230	-0.0172247	-0.122255		Ga0212129_111230	-0.0519739	-0.369298			Ga0212129_111230	0.109764	0.757611		Ga0212129_111230	0.0228531	0.16617		Ga0212129_111230	0.00380176	0.0263044			Ga0212129_111230	0.0438507	0.301455		Ga0212129_111230	-0.00474939	-0.032825		Ga0212129_111230	-0.0423455	-0.302087
Ga0212129_111231	0.022243	0.122019		Ga0212129_111231	0.0732389	0.385796		Ga0212129_111231	0.025074	0.123211			Ga0212129_111231	0.18423	1.20967		Ga0212129_111231	0.170439	1.07956		Ga0212129_111231	0.227551	1.39417			Ga0212129_111231	0.142812	0.972326		Ga0212129_111231	0.153738	0.991767		Ga0212129_111231	0.209908	1.44005			Ga0212129_111231	0.219552	1.40008		Ga0212129_111231	0.301722	1.98166		Ga0212129_111231	0.086918	0.561004
Ga0212129_111232	-0.292326	-1.48195		Ga0212129_111232	-0.0218194	-0.0924914		Ga0212129_111232	-0.205141	-1.02385			Ga0212129_111232	0.0515486	0.327119		Ga0212129_111232	-0.112573	-0.733089		Ga0212129_111232	-0.000969228	-0.00620165			Ga0212129_111232	0.0733561	0.44085		Ga0212129_111232	-0.0710309	-0.47175		Ga0212129_111232	-0.132048	-0.797003			Ga0212129_111232	-0.062825	-0.363055		Ga0212129_111232	-0.0390823	-0.229071		Ga0212129_111232	0.0339941	0.199202
Ga0212129_111233	0.353538	2.00741		Ga0212129_111233	-0.125775	-0.639337		Ga0212129_111233	0.0022707	0.0111125			Ga0212129_111233	0.189163	1.25489		Ga0212129_111233	0.207407	1.34429		Ga0212129_111233	0.294131	1.84353			Ga0212129_111233	0.196509	1.30321		Ga0212129_111233	0.266498	1.63085		Ga0212129_111233	0.249814	1.60574			Ga0212129_111233	0.236748	1.43072		Ga0212129_111233	0.228265	1.3949		Ga0212129_111233	0.339059	2.21975
Ga0212129_111234	0.32668	1.299		Ga0212129_111234	-0.251026	-0.866878		Ga0212129_111234	0.237763	0.879158			Ga0212129_111234	0.405305	1.83215		Ga0212129_111234	0.360224	1.80526		Ga0212129_111234	0.285224	1.15746			Ga0212129_111234	0.385334	1.43611		Ga0212129_111234	0.247962	1.08693		Ga0212129_111234	0.166772	0.625141			Ga0212129_111234	0.381003	1.84184		Ga0212129_111234	0.398865	1.89901		Ga0212129_111234	0.529572	2.3713
Ga0212129_111235	-0.0423474	-0.302449		Ga0212129_111235	-0.174891	-1.11453		Ga0212129_111235	-0.171664	-1.14471			Ga0212129_111235	-0.0131606	-0.101351		Ga0212129_111235	-0.127357	-0.977914		Ga0212129_111235	-0.0944396	-0.729665			Ga0212129_111235	-0.0690872	-0.532005		Ga0212129_111235	-0.167018	-1.30336		Ga0212129_111235	-0.129459	-1.0284			Ga0212129_111235	-0.0547563	-0.421492		Ga0212129_111235	-0.124515	-0.949636		Ga0212129_111235	-0.10731	-0.821953
Ga0212129_111237	0.319021	1.63254		Ga0212129_111237	0.319789	1.39332		Ga0212129_111237	0.277031	1.4164			Ga0212129_111237	0.244818	1.26561		Ga0212129_111237	0.190571	1.0113		Ga0212129_111237	0.258307	1.455			Ga0212129_111237	0.232186	1.30776		Ga0212129_111237	0.248119	1.43342		Ga0212129_111237	0.174019	0.950106			Ga0212129_111237	0.342331	1.96522		Ga0212129_111237	0.23683	1.36525		Ga0212129_111237	0.261786	1.51721
Ga0212129_111239	0.0209297	0.0953002		Ga0212129_111239	-0.164724	-0.90563		Ga0212129_111239	-0.452224	-2.12454			Ga0212129_111239	-0.0412809	-0.250978		Ga0212129_111239	-0.0574717	-0.359643		Ga0212129_111239	-0.170317	-0.979656			Ga0212129_111239	-0.112474	-0.720388		Ga0212129_111239	0.0234576	0.138495		Ga0212129_111239	-0.12874	-0.775251			Ga0212129_111239	-0.136842	-0.836606		Ga0212129_111239	-0.0489636	-0.287471		Ga0212129_111239	-0.0880922	-0.527988
Ga0212129_111240	0.115618	0.738977		Ga0212129_111240	0.0852327	0.477537		Ga0212129_111240	0.0502474	0.292463			Ga0212129_111240	0.0608222	0.414348		Ga0212129_111240	0.137777	0.938012		Ga0212129_111240	0.0899587	0.584323			Ga0212129_111240	0.063166	0.438778		Ga0212129_111240	0.0257613	0.173126		Ga0212129_111240	0.114461	0.774969			Ga0212129_111240	0.100029	0.695621		Ga0212129_111240	0.0967878	0.62408		Ga0212129_111240	0.115604	0.764611
Ga0212129_111241	-0.239915	-1.40944		Ga0212129_111241	0.0318158	0.15571		Ga0212129_111241	-0.193371	-0.950395			Ga0212129_111241	-0.104101	-0.661112		Ga0212129_111241	0.00692416	0.0434337		Ga0212129_111241	-0.123232	-0.816618			Ga0212129_111241	-0.0492655	-0.334966		Ga0212129_111241	-0.0928352	-0.544354		Ga0212129_111241	-0.0759957	-0.486662			Ga0212129_111241	-0.0318849	-0.205396		Ga0212129_111241	-0.156779	-0.977926		Ga0212129_111241	-0.130998	-0.831471
Ga0212129_111242	-0.283897	-1.75906		Ga0212129_111242	-0.196773	-1.13798		Ga0212129_111242	-0.0627706	-0.411763			Ga0212129_111242	-0.0365148	-0.252839		Ga0212129_111242	0.0129945	0.0848916		Ga0212129_111242	0.0190469	0.138047			Ga0212129_111242	-0.0591147	-0.411457		Ga0212129_111242	-0.105584	-0.707999		Ga0212129_111242	-0.0198646	-0.139089			Ga0212129_111242	-0.044307	-0.308107		Ga0212129_111242	-0.0298935	-0.213888		Ga0212129_111242	-0.0310942	-0.219784
Ga0212129_111243	-0.134373	-0.630808		Ga0212129_111243	0.147096	0.539129		Ga0212129_111243	-0.21059	-0.749173			Ga0212129_111243	0.304171	1.75993		Ga0212129_111243	0.262743	1.437		Ga0212129_111243	0.406839	2.23491			Ga0212129_111243	0.171013	0.902519		Ga0212129_111243	0.118525	0.561435		Ga0212129_111243	0.133794	0.766475			Ga0212129_111243	0.335086	1.65785		Ga0212129_111243	0.215694	1.2378		Ga0212129_111243	0.32742	1.72473
Ga0212129_111244	-0.123107	-0.865103		Ga0212129_111244	-0.298607	-1.81784		Ga0212129_111244	-0.0345964	-0.229662			Ga0212129_111244	-0.0119221	-0.0905452		Ga0212129_111244	-0.0151513	-0.110227		Ga0212129_111244	-0.0201549	-0.147294			Ga0212129_111244	-0.0584135	-0.414434		Ga0212129_111244	-0.0557843	-0.38636		Ga0212129_111244	-0.00418389	-0.0304095			Ga0212129_111244	0.00714197	0.049815		Ga0212129_111244	-0.0545932	-0.387528		Ga0212129_111244	-0.0127746	-0.0954236
Ga0212129_111245	0.0457729	0.293369		Ga0212129_111245	0.375966	2.1653		Ga0212129_111245	0.262115	1.56109			Ga0212129_111245	0.217135	1.48448		Ga0212129_111245	0.27625	1.9698		Ga0212129_111245	0.270491	1.81633			Ga0212129_111245	0.271568	1.98601		Ga0212129_111245	0.341445	2.4066		Ga0212129_111245	0.264038	1.87463			Ga0212129_111245	0.319927	2.25627		Ga0212129_111245	0.288597	2.01561		Ga0212129_111245	0.223063	1.43762
Ga0212129_111247	-0.00716342	-0.046098		Ga0212129_111247	-0.151863	-0.875369		Ga0212129_111247	0.0928912	0.519926			Ga0212129_111247	0.103626	0.736974		Ga0212129_111247	0.0714742	0.501609		Ga0212129_111247	0.027129	0.185323			Ga0212129_111247	-0.0584144	-0.416847		Ga0212129_111247	-0.0516575	-0.362479		Ga0212129_111247	-0.0198646	-0.13128			Ga0212129_111247	0.106545	0.751906		Ga0212129_111247	0.0446784	0.309776		Ga0212129_111247	-0.109188	-0.769478
Ga0212129_111248	-0.0552486	-0.259256		Ga0212129_111248	0.243673	1.05192		Ga0212129_111248	-0.00788962	-0.0356739			Ga0212129_111248	0.207004	1.16938		Ga0212129_111248	0.244345	1.40414		Ga0212129_111248	0.15549	0.863023			Ga0212129_111248	0.246787	1.45733		Ga0212129_111248	0.25558	1.46206		Ga0212129_111248	0.24724	1.44174			Ga0212129_111248	0.104341	0.558033		Ga0212129_111248	0.133034	0.762259		Ga0212129_111248	0.0920469	0.51306
Ga0212129_111249	-0.526034	-2.37362		Ga0212129_111249	-1.34153	-4.96295		Ga0212129_111249	-0.69838	-3.39071			Ga0212129_111249	-0.645251	-4.09039		Ga0212129_111249	-1.07428	-5.73109		Ga0212129_111249	-0.583198	-3.41971			Ga0212129_111249	-0.372586	-2.30448		Ga0212129_111249	-0.79471	-4.78567		Ga0212129_111249	-0.630609	-3.71034			Ga0212129_111249	-0.589089	-3.38665		Ga0212129_111249	-0.603726	-3.51207		Ga0212129_111249	-0.581178	-3.19771
Ga0212129_111250	0.00499117	0.0336846		Ga0212129_111250	0.0944258	0.547208		Ga0212129_111250	-0.329109	-1.9978			Ga0212129_111250	-0.0633993	-0.475139		Ga0212129_111250	-0.0623281	-0.451256		Ga0212129_111250	-0.107334	-0.756112			Ga0212129_111250	-0.0216028	-0.156476		Ga0212129_111250	-0.0765231	-0.534689		Ga0212129_111250	-0.101869	-0.736965			Ga0212129_111250	-0.103527	-0.747733		Ga0212129_111250	-0.0679414	-0.494294		Ga0212129_111250	-0.0898074	-0.674547
Ga0212129_111251	0.177144	1.08037		Ga0212129_111251	-0.110461	-0.612747		Ga0212129_111251	0.0735831	0.418804			Ga0212129_111251	0.0952746	0.656904		Ga0212129_111251	0.130659	0.915803		Ga0212129_111251	0.109057	0.713014			Ga0212129_111251	0.013815	0.0901445		Ga0212129_111251	0.0790881	0.512406		Ga0212129_111251	0.0372141	0.258644			Ga0212129_111251	0.103395	0.720301		Ga0212129_111251	0.141681	0.971536		Ga0212129_111251	0.0902713	0.618691
Ga0212129_111252	-0.116163	-0.717364		Ga0212129_111252	-0.0301623	-0.170777		Ga0212129_111252	0.149513	0.886225			Ga0212129_111252	-0.000428477	-0.00326154		Ga0212129_111252	-0.0311353	-0.224473		Ga0212129_111252	-0.0627608	-0.467745			Ga0212129_111252	-0.0948225	-0.676174		Ga0212129_111252	-0.0940921	-0.684269		Ga0212129_111252	-0.167371	-1.2832			Ga0212129_111252	-0.0380951	-0.27677		Ga0212129_111252	-0.0783244	-0.604398		Ga0212129_111252	-0.0207461	-0.151509
Ga0212129_111255	0.0474481	0.306795		Ga0212129_111255	-0.030794	-0.17114		Ga0212129_111255	0.129662	0.808332			Ga0212129_111255	0.0367126	0.260871		Ga0212129_111255	0.0365771	0.263251		Ga0212129_111255	0.0290805	0.214887			Ga0212129_111255	0.00884766	0.0655495		Ga0212129_111255	0.0980707	0.682832		Ga0212129_111255	0.0678213	0.483989			Ga0212129_111255	0.00356771	0.025171		Ga0212129_111255	-0.0576528	-0.412243		Ga0212129_111255	-0.0210477	-0.160019
Ga0212129_111256	0.093684	0.451433		Ga0212129_111256	0.170909	0.879519		Ga0212129_111256	0.618709	3.1054			Ga0212129_111256	0.293029	1.66627		Ga0212129_111256	0.353183	1.99452		Ga0212129_111256	0.179005	0.95503			Ga0212129_111256	0.259422	1.33701		Ga0212129_111256	0.2572	1.30849		Ga0212129_111256	0.289053	1.59865			Ga0212129_111256	0.0674553	0.334318		Ga0212129_111256	0.204137	1.10348		Ga0212129_111256	0.191308	0.938736
Ga0212129_111257	-0.110639	-0.472681		Ga0212129_111257	0.0307492	0.154825		Ga0212129_111257	0.0699531	0.298146			Ga0212129_111257	-0.123555	-0.609828		Ga0212129_111257	-0.0344083	-0.178873		Ga0212129_111257	-0.304503	-1.54709			Ga0212129_111257	-0.234342	-1.33451		Ga0212129_111257	-0.204107	-0.952211		Ga0212129_111257	-0.198709	-1.18273			Ga0212129_111257	-0.133538	-0.629271		Ga0212129_111257	-0.390442	-2.07866		Ga0212129_111257	-0.249837	-1.326
Ga0212129_111258	0.181969	0.887996		Ga0212129_111258	-0.282852	-1.0158		Ga0212129_111258	0.134091	0.609842			Ga0212129_111258	-0.00774942	-0.0408037		Ga0212129_111258	0.0320866	0.184324		Ga0212129_111258	0.00942783	0.0509916			Ga0212129_111258	0.0621752	0.312824		Ga0212129_111258	0.131495	0.656144		Ga0212129_111258	-0.0581317	-0.351611			Ga0212129_111258	0.0297323	0.153279		Ga0212129_111258	0.0584835	0.320208		Ga0212129_111258	0.0729879	0.404845
Ga0212129_111259	-0.0667814	-0.444499		Ga0212129_111259	-0.0436817	-0.248789		Ga0212129_111259	0.153537	1.05161			Ga0212129_111259	0.0147541	0.106681		Ga0212129_111259	-0.0677813	-0.486976		Ga0212129_111259	-0.115628	-0.815376			Ga0212129_111259	-0.0958332	-0.685252		Ga0212129_111259	-0.0476334	-0.33724		Ga0212129_111259	-0.0876133	-0.630321			Ga0212129_111259	-0.0528071	-0.368652		Ga0212129_111259	0.00114632	0.00827433		Ga0212129_111259	-0.0737137	-0.538354
Ga0212129_111260	-0.329475	-1.85248		Ga0212129_111260	-0.40542	-1.90831		Ga0212129_111260	-0.305896	-1.69286			Ga0212129_111260	-0.164684	-1.09528		Ga0212129_111260	-0.0323702	-0.20103		Ga0212129_111260	-0.0428136	-0.270078			Ga0212129_111260	-0.0789924	-0.507965		Ga0212129_111260	-0.10584	-0.671011		Ga0212129_111260	-0.0476768	-0.306198			Ga0212129_111260	-0.163179	-0.954222		Ga0212129_111260	-0.125023	-0.83579		Ga0212129_111260	-0.0199092	-0.134054
Ga0212129_111261	0.0169438	0.121858		Ga0212129_111261	-0.0412235	-0.288546		Ga0212129_111261	-0.0290163	-0.212541			Ga0212129_111261	0.0277522	0.221368		Ga0212129_111261	0.0686058	0.528609		Ga0212129_111261	0.0101102	0.0773422			Ga0212129_111261	0.0463791	0.363803		Ga0212129_111261	0.0757666	0.590423		Ga0212129_111261	-0.00935873	-0.0742637			Ga0212129_111261	0.054082	0.416562		Ga0212129_111261	0.0627068	0.484182		Ga0212129_111261	0.107044	0.859473
Ga0212129_111262	-0.801425	-1.95605		Ga0212129_111262	-0.216203	-0.594998		Ga0212129_111262	-1.13201	-3.81128			Ga0212129_111262	-0.481014	-1.81953		Ga0212129_111262	-0.706281	-2.76528		Ga0212129_111262	-0.659696	-2.87676			Ga0212129_111262	-0.442033	-1.87988		Ga0212129_111262	-0.712607	-3.12193		Ga0212129_111262	-0.718048	-2.55023			Ga0212129_111262	-0.461742	-1.76577		Ga0212129_111262	-1.00521	-4.78301		Ga0212129_111262	-1.01559	-3.57972
Ga0212129_111263	-0.169128	-1.26412		Ga0212129_111263	-0.157235	-1.11444		Ga0212129_111263	-0.382032	-2.82309			Ga0212129_111263	-0.149015	-1.26942		Ga0212129_111263	-0.239795	-2.01672		Ga0212129_111263	-0.274747	-2.28418			Ga0212129_111263	-0.220864	-1.82951		Ga0212129_111263	-0.260816	-2.22506		Ga0212129_111263	-0.340627	-2.88935			Ga0212129_111263	-0.178286	-1.49022		Ga0212129_111263	-0.348282	-2.94467		Ga0212129_111263	-0.299892	-2.56276
Ga0212129_111264	0.00570593	0.0338061		Ga0212129_111264	0.00515282	0.0280404		Ga0212129_111264	-0.33008	-1.88238			Ga0212129_111264	-0.136262	-0.925164		Ga0212129_111264	-0.27894	-1.75617		Ga0212129_111264	-0.258162	-1.70504			Ga0212129_111264	-0.0529571	-0.346424		Ga0212129_111264	-0.190587	-1.23147		Ga0212129_111264	-0.241774	-1.58498			Ga0212129_111264	-0.233422	-1.54241		Ga0212129_111264	-0.297832	-2.05286		Ga0212129_111264	-0.225995	-1.4316
Ga0212129_111266	0.125187	0.727177		Ga0212129_111266	0.0742068	0.351526		Ga0212129_111266	-0.429031	-2.16484			Ga0212129_111266	-0.0946551	-0.616386		Ga0212129_111266	-0.23904	-1.5522		Ga0212129_111266	-0.124439	-0.813824			Ga0212129_111266	-0.299146	-1.85483		Ga0212129_111266	-0.390197	-2.4609		Ga0212129_111266	-0.319878	-2.07275			Ga0212129_111266	0.00182418	0.0112819		Ga0212129_111266	-0.223312	-1.42563		Ga0212129_111266	-0.269362	-1.70814
Ga0212129_111267	0.152679	0.575394		Ga0212129_111267	0.168043	0.529399		Ga0212129_111267	0.276545	1.13429			Ga0212129_111267	0.348569	1.97477		Ga0212129_111267	0.351903	1.88945		Ga0212129_111267	0.25314	1.40642			Ga0212129_111267	0.316364	1.74912		Ga0212129_111267	0.0673023	0.358906		Ga0212129_111267	0.144293	0.729466			Ga0212129_111267	0.35153	1.73952		Ga0212129_111267	0.109794	0.54933		Ga0212129_111267	0.182443	0.997665
Ga0212129_111269	0.528731	1.68088		Ga0212129_111269	-0.0422354	-0.143464		Ga0212129_111269	0.395213	1.4054			Ga0212129_111269	0.35791	1.39955		Ga0212129_111269	0.3213	1.19612		Ga0212129_111269	0.01761	0.067856			Ga0212129_111269	0.356662	1.48198		Ga0212129_111269	0.147787	0.611071		Ga0212129_111269	0.198358	1.01501			Ga0212129_111269	0.170475	0.846003		Ga0212129_111269	0.0206322	0.0810469		Ga0212129_111269	0.350759	1.35817
Ga0212129_111270	0.277972	0.863634		Ga0212129_111270	-0.160861	-0.42672		Ga0212129_111270	0.319363	0.750542			Ga0212129_111270	0.115043	0.501464		Ga0212129_111270	-0.0412074	-0.155369		Ga0212129_111270	0.154446	0.648226			Ga0212129_111270	0.152197	0.637735		Ga0212129_111270	0.248508	0.898134		Ga0212129_111270	0.201174	0.665094			Ga0212129_111270	0.096424	0.373164		Ga0212129_111270	0.249999	0.876649		Ga0212129_111270	0.164126	0.604029
Ga0212129_111271	0.588906	1.92364		Ga0212129_111271	-0.201865	-0.502524		Ga0212129_111271	0.621527	1.69146			Ga0212129_111271	0.278893	1.11253		Ga0212129_111271	0.317923	0.917608		Ga0212129_111271	0.424282	1.30471			Ga0212129_111271	0.11724	0.387389		Ga0212129_111271	0.218947	0.700184		Ga0212129_111271	0.153641	0.577107			Ga0212129_111271	0.253894	0.82987		Ga0212129_111271	0.404179	1.60773		Ga0212129_111271	0.580685	1.80598
Ga0212129_111272	0.192173	0.952199		Ga0212129_111272	0.305004	1.45389		Ga0212129_111272	0.359409	1.89878			Ga0212129_111272	0.0013623	0.00802669		Ga0212129_111272	-0.0303616	-0.158095		Ga0212129_111272	0.024502	0.138063			Ga0212129_111272	0.141318	0.763478		Ga0212129_111272	0.00818216	0.0463972		Ga0212129_111272	0.0966629	0.527547			Ga0212129_111272	0.0406233	0.208157		Ga0212129_111272	-0.0044651	-0.0278883		Ga0212129_111272	0.0710073	0.40346
Ga0212129_111273	0.121379	0.915783		Ga0212129_111273	-0.0330837	-0.231574		Ga0212129_111273	0.060793	0.44012			Ga0212129_111273	0.0241689	0.192566		Ga0212129_111273	0.0629601	0.507537		Ga0212129_111273	0.075647	0.607664			Ga0212129_111273	0.0616991	0.492001		Ga0212129_111273	0.0183023	0.143411		Ga0212129_111273	0.0555712	0.452195			Ga0212129_111273	0.0795023	0.633328		Ga0212129_111273	0.0308589	0.244917		Ga0212129_111273	0.050563	0.410476
Ga0212129_111274	0.0237132	0.13686		Ga0212129_111274	0.155574	0.900577		Ga0212129_111274	0.240487	1.35944			Ga0212129_111274	0.00088832	0.00631458		Ga0212129_111274	0.00363815	0.0239591		Ga0212129_111274	0.0480076	0.293264			Ga0212129_111274	0.0240894	0.165916		Ga0212129_111274	0.068507	0.450154		Ga0212129_111274	0.00455495	0.0304232			Ga0212129_111274	0.0371564	0.253104		Ga0212129_111274	-0.0484563	-0.314801		Ga0212129_111274	-0.0709869	-0.461223
Ga0212129_111276	-0.236994	-1.52674		Ga0212129_111276	0.256299	1.42868		Ga0212129_111276	0.104744	0.653287			Ga0212129_111276	0.0273334	0.207062		Ga0212129_111276	0.117811	0.840723		Ga0212129_111276	0.0946793	0.716807			Ga0212129_111276	0.0793082	0.598789		Ga0212129_111276	0.094153	0.682142		Ga0212129_111276	0.0443324	0.315581			Ga0212129_111276	0.0811529	0.556254		Ga0212129_111276	0.00698806	0.0508566		Ga0212129_111276	0.00475471	0.0341302
Ga0212129_111278	-0.00218138	-0.0146417		Ga0212129_111278	0.0391776	0.227576		Ga0212129_111278	-0.072026	-0.477737			Ga0212129_111278	-0.0719791	-0.524558		Ga0212129_111278	-0.0564084	-0.416226		Ga0212129_111278	-0.0302416	-0.208913			Ga0212129_111278	-0.0971993	-0.712868		Ga0212129_111278	-0.0948782	-0.697024		Ga0212129_111278	-0.109237	-0.771098			Ga0212129_111278	-0.055265	-0.386833		Ga0212129_111278	-0.0530028	-0.38461		Ga0212129_111278	-0.0827626	-0.566202
Ga0212129_111279	0.0982436	0.672236		Ga0212129_111279	-0.0785169	-0.502678		Ga0212129_111279	0.0534392	0.316804			Ga0212129_111279	0.0396422	0.289856		Ga0212129_111279	0.138171	1.00661		Ga0212129_111279	0.0697482	0.498117			Ga0212129_111279	0.0803121	0.587367		Ga0212129_111279	0.0543381	0.380881		Ga0212129_111279	0.107683	0.774594			Ga0212129_111279	0.0725173	0.514975		Ga0212129_111279	0.0151484	0.110402		Ga0212129_111279	0.114394	0.850687
Ga0212129_111281	0.103199	0.615585		Ga0212129_111281	0.230292	0.940761		Ga0212129_111281	0.495438	2.07545			Ga0212129_111281	0.0899144	0.510056		Ga0212129_111281	0.191724	1.08374		Ga0212129_111281	0.176743	0.936744			Ga0212129_111281	0.0967016	0.547136		Ga0212129_111281	0.14497	0.775158		Ga0212129_111281	0.173358	0.989911			Ga0212129_111281	0.219991	1.18232		Ga0212129_111281	0.0795829	0.420094		Ga0212129_111281	0.238499	1.41959
Ga0212129_111282	-0.63427	-3.13715		Ga0212129_111282	-1.29973	-4.17831		Ga0212129_111282	-0.569483	-2.67319			Ga0212129_111282	-1.13277	-6.50453		Ga0212129_111282	-0.878227	-5.27895		Ga0212129_111282	-0.612188	-3.60299			Ga0212129_111282	-0.949085	-5.68149		Ga0212129_111282	-0.705318	-4.18646		Ga0212129_111282	-0.599237	-3.70161			Ga0212129_111282	-0.958627	-5.70057		Ga0212129_111282	-0.707709	-4.21047		Ga0212129_111282	-0.517185	-3.09409
Ga0212129_111283	-2.88892	-5.94573		Ga0212129_111283	-2.70539	-6.02853		Ga0212129_111283	-1.81573	-5.27602			Ga0212129_111283	-3.52886	-9.31313		Ga0212129_111283	-3.20417	-10.019		Ga0212129_111283	-2.17613	-9.12676			Ga0212129_111283	-2.96458	-10.0272		Ga0212129_111283	-2.46471	-8.92013		Ga0212129_111283	-2.10688	-8.95699			Ga0212129_111283	-2.94271	-10.6501		Ga0212129_111283	-2.22574	-8.58507		Ga0212129_111283	-1.8978	-7.84301
Ga0212129_111284	-1.03074	-2.22358		Ga0212129_111284	-1.43448	-2.43791		Ga0212129_111284	-1.5144	-3.04525			Ga0212129_111284	-1.30324	-4.56747		Ga0212129_111284	-1.53673	-3.6839		Ga0212129_111284	-1.12192	-3.15107			Ga0212129_111284	-1.35009	-3.68141		Ga0212129_111284	-1.20531	-3.41289		Ga0212129_111284	-0.946164	-2.38004			Ga0212129_111284	-1.53989	-2.89062		Ga0212129_111284	-1.05802	-3.02031		Ga0212129_111284	-0.845921	-2.04671
Ga0212129_111285	-0.0493618	-0.342231		Ga0212129_111285	-0.159695	-0.934073		Ga0212129_111285	-0.113546	-0.719148			Ga0212129_111285	-0.048197	-0.371441		Ga0212129_111285	-0.0590702	-0.433726		Ga0212129_111285	-0.101523	-0.771997			Ga0212129_111285	-0.0991105	-0.727225		Ga0212129_111285	-0.0675999	-0.499535		Ga0212129_111285	-0.10428	-0.779786			Ga0212129_111285	-0.0296704	-0.221372		Ga0212129_111285	-0.190289	-1.40887		Ga0212129_111285	-0.104631	-0.766941
Ga0212129_111286	0.14119	0.794779		Ga0212129_111286	0.110645	0.541413		Ga0212129_111286	-0.217083	-1.12914			Ga0212129_111286	-0.0182534	-0.118473		Ga0212129_111286	0.0168907	0.113086		Ga0212129_111286	0.0532113	0.356674			Ga0212129_111286	0.0201674	0.131078		Ga0212129_111286	-0.0437083	-0.282492		Ga0212129_111286	0.0246123	0.156771			Ga0212129_111286	-0.0414152	-0.27421		Ga0212129_111286	-7.29648e-05	-0.000493734		Ga0212129_111286	0.0414502	0.266094
Ga0212129_111287	-0.0955924	-0.444973		Ga0212129_111287	0.246825	1.28579		Ga0212129_111287	0.0230476	0.0997132			Ga0212129_111287	0.1336	0.705584		Ga0212129_111287	0.0980187	0.48912		Ga0212129_111287	0.0499724	0.230396			Ga0212129_111287	0.0556091	0.286447		Ga0212129_111287	0.00904254	0.0393973		Ga0212129_111287	0.0997809	0.458065			Ga0212129_111287	0.00105292	0.00467178		Ga0212129_111287	-0.053436	-0.239101		Ga0212129_111287	0.0536633	0.246532
Ga0212129_111288	-0.13863	-0.651777		Ga0212129_111288	0.294043	1.23272		Ga0212129_111288	0.239257	1.00588			Ga0212129_111288	0.19512	1.20711		Ga0212129_111288	0.075856	0.445995		Ga0212129_111288	0.0800513	0.471217			Ga0212129_111288	0.145733	0.927601		Ga0212129_111288	0.137596	0.839782		Ga0212129_111288	0.115794	0.68406			Ga0212129_111288	0.0619879	0.364974		Ga0212129_111288	0.0262329	0.150799		Ga0212129_111288	0.184725	1.06314
Ga0212129_111289	0.0899549	0.586725		Ga0212129_111289	0.0897614	0.540004		Ga0212129_111289	0.132811	0.888005			Ga0212129_111289	0.0508126	0.374248		Ga0212129_111289	0.0481638	0.339095		Ga0212129_111289	0.0279344	0.191147			Ga0212129_111289	0.0101125	0.0729204		Ga0212129_111289	0.0169742	0.117919		Ga0212129_111289	0.0132534	0.0928781			Ga0212129_111289	0.0971738	0.645535		Ga0212129_111289	0.0411144	0.296349		Ga0212129_111289	0.0411069	0.305116
Ga0212129_111290	-0.234752	-1.28507		Ga0212129_111290	-0.248981	-1.27305		Ga0212129_111290	-0.00997319	-0.0584077			Ga0212129_111290	-0.142413	-0.883295		Ga0212129_111290	-0.0538592	-0.350655		Ga0212129_111290	-0.0461537	-0.290535			Ga0212129_111290	-0.148743	-0.951744		Ga0212129_111290	-0.179823	-1.15357		Ga0212129_111290	-0.0982337	-0.593529			Ga0212129_111290	-0.0531256	-0.320874		Ga0212129_111290	-0.163158	-1.02231		Ga0212129_111290	-0.0493206	-0.293587
Ga0212129_111291	-0.0972458	-0.452819		Ga0212129_111291	-0.309975	-1.17551		Ga0212129_111291	-0.272513	-1.15457			Ga0212129_111291	-0.021532	-0.115001		Ga0212129_111291	0.00970368	0.0496013		Ga0212129_111291	-0.0767521	-0.429447			Ga0212129_111291	-0.245513	-1.1829		Ga0212129_111291	-0.0460911	-0.251514		Ga0212129_111291	-0.162968	-0.879913			Ga0212129_111291	-0.0845132	-0.461378		Ga0212129_111291	-0.039865	-0.237752		Ga0212129_111291	-0.0370981	-0.19936
Ga0212129_111292	-0.121716	-0.478809		Ga0212129_111292	0.340808	1.4355		Ga0212129_111292	0.158559	0.656993			Ga0212129_111292	0.269754	1.42563		Ga0212129_111292	0.162603	0.860159		Ga0212129_111292	0.258275	1.27707			Ga0212129_111292	0.291042	1.54765		Ga0212129_111292	0.242442	1.26288		Ga0212129_111292	0.28079	1.49806			Ga0212129_111292	0.181036	0.964917		Ga0212129_111292	0.155072	0.806186		Ga0212129_111292	0.255253	1.32636
Ga0212129_111293	-0.307837	-1.81348		Ga0212129_111293	-0.0670701	-0.341875		Ga0212129_111293	-0.0280359	-0.162662			Ga0212129_111293	-0.369642	-2.47157		Ga0212129_111293	-0.346269	-2.23032		Ga0212129_111293	-0.220331	-1.39946			Ga0212129_111293	-0.344866	-2.4242		Ga0212129_111293	-0.180322	-1.21131		Ga0212129_111293	-0.203902	-1.29614			Ga0212129_111293	-0.317607	-2.04908		Ga0212129_111293	-0.164212	-1.12233		Ga0212129_111293	-0.195096	-1.37194
Ga0212129_111294	-0.224827	-1.16295		Ga0212129_111294	0.183039	0.728693		Ga0212129_111294	-0.223001	-0.986715			Ga0212129_111294	0.0170963	0.0893917		Ga0212129_111294	0.0429926	0.193915		Ga0212129_111294	0.131787	0.65719			Ga0212129_111294	0.0177151	0.0912423		Ga0212129_111294	-0.024217	-0.124095		Ga0212129_111294	0.00224499	0.0116321			Ga0212129_111294	-0.117315	-0.609159		Ga0212129_111294	-0.0261004	-0.131163		Ga0212129_111294	0.0618157	0.311844
Ga0212129_111295	0.19615	1.17875		Ga0212129_111295	-0.0949097	-0.463686		Ga0212129_111295	-0.00313192	-0.0161239			Ga0212129_111295	0.138163	0.862517		Ga0212129_111295	-0.0110782	-0.0707522		Ga0212129_111295	-0.0439889	-0.258801			Ga0212129_111295	0.0565867	0.33503		Ga0212129_111295	-0.031645	-0.169039		Ga0212129_111295	-0.109955	-0.639135			Ga0212129_111295	-0.0352238	-0.1954		Ga0212129_111295	-0.0850307	-0.496076		Ga0212129_111295	0.0161886	0.0919627
Ga0212129_111296	-0.437456	-1.95542		Ga0212129_111296	0.0573336	0.254677		Ga0212129_111296	-0.217939	-0.941117			Ga0212129_111296	-0.12969	-0.66542		Ga0212129_111296	-0.144066	-0.720325		Ga0212129_111296	-0.0569085	-0.303616			Ga0212129_111296	-0.189356	-1.01133		Ga0212129_111296	-0.107538	-0.566741		Ga0212129_111296	-0.0773826	-0.404899			Ga0212129_111296	-0.0558907	-0.280455		Ga0212129_111296	-0.204416	-1.12771		Ga0212129_111296	-0.0931854	-0.55795
Ga0212129_111297	0.0232777	0.0871324		Ga0212129_111297	0.0649062	0.219686		Ga0212129_111297	0.302993	0.988332			Ga0212129_111297	0.0884847	0.348564		Ga0212129_111297	-0.0712117	-0.251203		Ga0212129_111297	0.00774583	0.0303536			Ga0212129_111297	-0.103607	-0.345609		Ga0212129_111297	-0.0178424	-0.0768641		Ga0212129_111297	-0.205353	-0.859544			Ga0212129_111297	0.0573217	0.235094		Ga0212129_111297	-0.185995	-0.58235		Ga0212129_111297	-0.430981	-1.55403
Ga0212129_111298	-0.152759	-0.613455		Ga0212129_111298	-0.145712	-0.427023		Ga0212129_111298	0.165328	0.49806			Ga0212129_111298	-0.207954	-0.860998		Ga0212129_111298	-0.186226	-0.819848		Ga0212129_111298	-0.237614	-0.881563			Ga0212129_111298	-0.221152	-0.926454		Ga0212129_111298	-0.321167	-1.26086		Ga0212129_111298	-0.319955	-1.28304			Ga0212129_111298	-0.183713	-0.691665		Ga0212129_111298	-0.266992	-1.06599		Ga0212129_111298	-0.241676	-0.940045
Ga0212129_111299	0.0144273	0.0597916		Ga0212129_111299	0.204061	0.647424		Ga0212129_111299	0.227371	0.985167			Ga0212129_111299	0.0343719	0.193604		Ga0212129_111299	-0.260377	-1.23607		Ga0212129_111299	-0.114324	-0.534343			Ga0212129_111299	-0.102099	-0.466933		Ga0212129_111299	-0.130009	-0.623651		Ga0212129_111299	-0.179727	-0.846119			Ga0212129_111299	-0.181369	-0.931153		Ga0212129_111299	-0.290428	-1.356		Ga0212129_111299	-0.158417	-0.766395
Ga0212129_11130	0.26744	1.49175		Ga0212129_11130	0.465076	2.35224		Ga0212129_11130	0.319509	1.72652			Ga0212129_11130	0.255355	1.54335		Ga0212129_11130	0.298439	1.80299		Ga0212129_11130	0.387266	2.4495			Ga0212129_11130	0.252071	1.53534		Ga0212129_11130	0.288084	1.71893		Ga0212129_11130	0.211924	1.32638			Ga0212129_11130	0.219296	1.35784		Ga0212129_11130	0.255437	1.54688		Ga0212129_11130	0.324395	2.09011
Ga0212129_111300	0.022667	0.0881137		Ga0212129_111300	-0.171667	-0.842111		Ga0212129_111300	-0.0727915	-0.343974			Ga0212129_111300	-0.134091	-0.730906		Ga0212129_111300	-0.0787626	-0.36855		Ga0212129_111300	-0.135898	-0.623656			Ga0212129_111300	-0.116053	-0.654738		Ga0212129_111300	0.050168	0.252317		Ga0212129_111300	-0.131818	-0.607851			Ga0212129_111300	-0.164057	-0.669894		Ga0212129_111300	-0.114776	-0.485652		Ga0212129_111300	-0.0155757	-0.0722174
Ga0212129_111301	0.124845	0.847798		Ga0212129_111301	-0.022072	-0.142253		Ga0212129_111301	0.36407	2.64321			Ga0212129_111301	0.0895495	0.675672		Ga0212129_111301	0.0807405	0.610573		Ga0212129_111301	0.00481451	0.035534			Ga0212129_111301	0.0820497	0.630447		Ga0212129_111301	0.0738292	0.567225		Ga0212129_111301	0.063182	0.488084			Ga0212129_111301	0.143543	1.07904		Ga0212129_111301	-0.0690716	-0.52841		Ga0212129_111301	0.10857	0.815672
Ga0212129_111303	0.0678418	0.48412		Ga0212129_111303	0.0930952	0.643295		Ga0212129_111303	0.173633	1.23495			Ga0212129_111303	-0.0372551	-0.274371		Ga0212129_111303	0.0402585	0.299395		Ga0212129_111303	-0.0956427	-0.693637			Ga0212129_111303	0.0153642	0.112458		Ga0212129_111303	-0.0497883	-0.370844		Ga0212129_111303	-0.05956	-0.450414			Ga0212129_111303	0.0240018	0.17305		Ga0212129_111303	-0.0585227	-0.424698		Ga0212129_111303	-0.00594528	-0.041316
Ga0212129_111304	0.0510624	0.203324		Ga0212129_111304	-0.00954484	-0.0333212		Ga0212129_111304	0.0137717	0.0536912			Ga0212129_111304	-0.151387	-0.719653		Ga0212129_111304	-0.0201756	-0.100972		Ga0212129_111304	-0.107312	-0.532593			Ga0212129_111304	-0.0256603	-0.138343		Ga0212129_111304	-0.0847714	-0.439455		Ga0212129_111304	-0.0108091	-0.0588492			Ga0212129_111304	0.126724	0.5982		Ga0212129_111304	-0.135872	-0.623061		Ga0212129_111304	-0.0581053	-0.276248
Ga0212129_111305	0.113174	0.574754		Ga0212129_111305	0.17864	0.975204		Ga0212129_111305	0.0957533	0.5117			Ga0212129_111305	0.219068	1.45237		Ga0212129_111305	0.0961608	0.656365		Ga0212129_111305	0.024526	0.149389			Ga0212129_111305	0.0939652	0.610126		Ga0212129_111305	0.117556	0.724733		Ga0212129_111305	0.112049	0.707323			Ga0212129_111305	0.0689317	0.425991		Ga0212129_111305	0.0623244	0.391732		Ga0212129_111305	0.253277	1.75171
Ga0212129_111307	0.36151	1.85074		Ga0212129_111307	0.139544	0.573977		Ga0212129_111307	0.166174	0.828662			Ga0212129_111307	0.0788092	0.445863		Ga0212129_111307	0.187516	1.12097		Ga0212129_111307	0.0653534	0.366106			Ga0212129_111307	0.208788	1.22068		Ga0212129_111307	0.0866842	0.530963		Ga0212129_111307	0.173066	1.03741			Ga0212129_111307	0.197649	1.17079		Ga0212129_111307	0.00663991	0.0376805		Ga0212129_111307	0.0952283	0.563777
Ga0212129_111308	0.0918106	0.472021		Ga0212129_111308	0.280008	1.35892		Ga0212129_111308	-0.0231684	-0.116841			Ga0212129_111308	0.000929747	0.00587668		Ga0212129_111308	-0.0342572	-0.217586		Ga0212129_111308	-0.0928148	-0.564394			Ga0212129_111308	-0.0349043	-0.216686		Ga0212129_111308	-0.0396335	-0.232043		Ga0212129_111308	-0.128794	-0.72052			Ga0212129_111308	0.0370276	0.212082		Ga0212129_111308	-0.158854	-1.04127		Ga0212129_111308	-0.0475679	-0.299553
Ga0212129_111309	0.45466	2.25405		Ga0212129_111309	0.291265	1.56302		Ga0212129_111309	0.0183436	0.0903886			Ga0212129_111309	0.140299	0.713841		Ga0212129_111309	0.168951	0.994037		Ga0212129_111309	0.0329131	0.1971			Ga0212129_111309	0.0948863	0.519487		Ga0212129_111309	0.0178309	0.103732		Ga0212129_111309	0.0352223	0.189591			Ga0212129_111309	0.104292	0.561245		Ga0212129_111309	0.121782	0.694911		Ga0212129_111309	0.0494305	0.285173
Ga0212129_11131	0.279343	1.49968		Ga0212129_11131	0.351158	1.86059		Ga0212129_11131	0.230461	1.16656			Ga0212129_11131	0.123216	0.768704		Ga0212129_11131	0.211019	1.3074		Ga0212129_11131	0.183146	1.16253			Ga0212129_11131	0.0209016	0.126308		Ga0212129_11131	0.300765	1.92408		Ga0212129_11131	0.0776723	0.490157			Ga0212129_11131	0.126008	0.79042		Ga0212129_11131	0.206984	1.3811		Ga0212129_11131	0.0919803	0.594218
Ga0212129_111313	0.217805	1.08556		Ga0212129_111313	0.129909	0.592947		Ga0212129_111313	0.270549	1.42982			Ga0212129_111313	-0.0336577	-0.216488		Ga0212129_111313	0.0165182	0.108584		Ga0212129_111313	0.0456382	0.275382			Ga0212129_111313	0.126721	0.788856		Ga0212129_111313	-0.082345	-0.539552		Ga0212129_111313	0.132456	0.775089			Ga0212129_111313	-0.0580189	-0.334959		Ga0212129_111313	-0.155248	-0.906574		Ga0212129_111313	-0.011659	-0.0728436
Ga0212129_111315	0.0235126	0.148022		Ga0212129_111315	-0.0596845	-0.315806		Ga0212129_111315	-0.0809647	-0.472405			Ga0212129_111315	-0.146253	-0.980559		Ga0212129_111315	-0.104184	-0.724543		Ga0212129_111315	-0.0754675	-0.483211			Ga0212129_111315	-0.0478474	-0.316512		Ga0212129_111315	-0.0517771	-0.341588		Ga0212129_111315	-0.00742203	-0.0501942			Ga0212129_111315	-0.0595415	-0.364462		Ga0212129_111315	-0.063007	-0.432367		Ga0212129_111315	-0.0288535	-0.191135
Ga0212129_111316	0.0570847	0.374284		Ga0212129_111316	-0.187317	-0.947357		Ga0212129_111316	0.0178827	0.106889			Ga0212129_111316	0.128764	0.928		Ga0212129_111316	0.230483	1.56964		Ga0212129_111316	0.14567	0.963471			Ga0212129_111316	0.141302	1.00402		Ga0212129_111316	0.157712	1.09744		Ga0212129_111316	0.203117	1.46931			Ga0212129_111316	0.10273	0.672284		Ga0212129_111316	0.194261	1.33674		Ga0212129_111316	0.138263	0.992012
Ga0212129_111318	0.0907104	0.711659		Ga0212129_111318	-0.0763722	-0.527648		Ga0212129_111318	0.13133	0.94981			Ga0212129_111318	-0.00853108	-0.0709521		Ga0212129_111318	0.14799	1.21482		Ga0212129_111318	0.0544044	0.430495			Ga0212129_111318	0.0894895	0.729736		Ga0212129_111318	0.0617024	0.496212		Ga0212129_111318	0.0198778	0.164052			Ga0212129_111318	0.097915	0.805245		Ga0212129_111318	-0.0350593	-0.284256		Ga0212129_111318	0.0763672	0.609707
Ga0212129_111319	0.23839	1.33881		Ga0212129_111319	0.222273	0.974072		Ga0212129_111319	0.158295	0.922491			Ga0212129_111319	0.233798	1.48076		Ga0212129_111319	0.12863	0.819181		Ga0212129_111319	0.24696	1.50066			Ga0212129_111319	0.23285	1.5403		Ga0212129_111319	0.204699	1.31549		Ga0212129_111319	0.0924591	0.596619			Ga0212129_111319	0.299714	2.02223		Ga0212129_111319	0.245454	1.57814		Ga0212129_111319	0.209169	1.3289
Ga0212129_11132	0.445311	2.80938		Ga0212129_11132	0.517718	2.71921		Ga0212129_11132	0.332686	1.76675			Ga0212129_11132	0.448154	2.98586		Ga0212129_11132	0.521108	3.6176		Ga0212129_11132	0.577538	4.05705			Ga0212129_11132	0.412835	2.64738		Ga0212129_11132	0.557463	3.71859		Ga0212129_11132	0.467541	3.15803			Ga0212129_11132	0.485787	3.41731		Ga0212129_11132	0.513039	3.50481		Ga0212129_11132	0.536565	3.70875
Ga0212129_111321	0.26143	1.60334		Ga0212129_111321	-0.0205846	-0.108324		Ga0212129_111321	0.107526	0.555329			Ga0212129_111321	0.0859649	0.584583		Ga0212129_111321	0.256061	1.6125		Ga0212129_111321	0.13995	0.924974			Ga0212129_111321	0.156348	1.068		Ga0212129_111321	0.119376	0.795616		Ga0212129_111321	0.0421008	0.256765			Ga0212129_111321	0.174587	1.10592		Ga0212129_111321	0.289259	1.94028		Ga0212129_111321	0.174367	1.15865
Ga0212129_111322	0.224641	0.96201		Ga0212129_111322	0.133115	0.438738		Ga0212129_111322	0.453279	1.73967			Ga0212129_111322	0.548291	2.37774		Ga0212129_111322	0.285833	1.13014		Ga0212129_111322	0.452552	2.1167			Ga0212129_111322	0.410672	1.71465		Ga0212129_111322	0.239991	0.875618		Ga0212129_111322	0.380555	1.70863			Ga0212129_111322	0.273528	1.074		Ga0212129_111322	0.353265	1.512		Ga0212129_111322	0.379244	1.54117
Ga0212129_111324	0.159111	0.967607		Ga0212129_111324	-0.0870722	-0.4652		Ga0212129_111324	-0.315505	-1.54747			Ga0212129_111324	-0.144711	-0.912868		Ga0212129_111324	-0.023816	-0.145661		Ga0212129_111324	-0.0760086	-0.464753			Ga0212129_111324	-0.0438529	-0.284761		Ga0212129_111324	-0.0494007	-0.329433		Ga0212129_111324	-0.0522114	-0.354006			Ga0212129_111324	-0.0738506	-0.452591		Ga0212129_111324	-0.158662	-1.0208		Ga0212129_111324	-0.162709	-1.01173
Ga0212129_111325	-0.328965	-1.49935		Ga0212129_111325	0.106868	0.533148		Ga0212129_111325	-0.238815	-1.25626			Ga0212129_111325	-0.0619278	-0.404338		Ga0212129_111325	-0.134359	-0.780802		Ga0212129_111325	0.0367602	0.208614			Ga0212129_111325	-0.00519063	-0.0326853		Ga0212129_111325	0.0272199	0.161738		Ga0212129_111325	-0.156206	-0.934322			Ga0212129_111325	-0.0364989	-0.218629		Ga0212129_111325	-0.0231363	-0.151381		Ga0212129_111325	0.0515519	0.338207
Ga0212129_111326	0.203082	0.999298		Ga0212129_111326	0.0311032	0.129856		Ga0212129_111326	0.239507	1.268			Ga0212129_111326	0.335921	2.14062		Ga0212129_111326	0.245008	1.56438		Ga0212129_111326	0.178114	1.05583			Ga0212129_111326	0.308913	1.97612		Ga0212129_111326	0.223199	1.38255		Ga0212129_111326	0.06368	0.393215			Ga0212129_111326	0.254923	1.52863		Ga0212129_111326	0.222479	1.37092		Ga0212129_111326	0.203003	1.27516
Ga0212129_111327	-0.375167	-1.56466		Ga0212129_111327	-0.155713	-0.80665		Ga0212129_111327	-0.440592	-2.2092			Ga0212129_111327	-0.235658	-1.29314		Ga0212129_111327	-0.0729305	-0.422497		Ga0212129_111327	-0.138978	-0.744568			Ga0212129_111327	-0.10531	-0.571266		Ga0212129_111327	-0.182095	-1.05806		Ga0212129_111327	-0.11187	-0.604496			Ga0212129_111327	-0.198935	-1.12617		Ga0212129_111327	-0.158836	-0.899777		Ga0212129_111327	-0.146901	-0.82153
Ga0212129_111328	0.21041	0.342175		Ga0212129_111328	0.258507	0.39905		Ga0212129_111328	-0.46929	-1.20824			Ga0212129_111328	0.317685	1.15249		Ga0212129_111328	0.2634	0.828924		Ga0212129_111328	-0.0433164	-0.126266			Ga0212129_111328	0.191386	0.635476		Ga0212129_111328	0.168022	0.437989		Ga0212129_111328	0.392551	1.30882			Ga0212129_111328	0.351355	1.34661		Ga0212129_111328	0.0681312	0.233461		Ga0212129_111328	-0.0247457	-0.0703084
Ga0212129_111329	-0.271503	-1.34616		Ga0212129_111329	-0.604618	-2.75022		Ga0212129_111329	-0.377892	-1.74319			Ga0212129_111329	-0.0545623	-0.349341		Ga0212129_111329	-0.122411	-0.741668		Ga0212129_111329	-0.273076	-1.49371			Ga0212129_111329	-0.373303	-2.35946		Ga0212129_111329	-0.375555	-2.333		Ga0212129_111329	-0.220562	-1.3444			Ga0212129_111329	-0.210703	-1.19778		Ga0212129_111329	-0.25044	-1.41555		Ga0212129_111329	-0.352959	-2.01376
Ga0212129_11133	0.391158	1.941		Ga0212129_11133	0.421699	2.0293		Ga0212129_11133	0.429918	1.98444			Ga0212129_11133	0.101879	0.628865		Ga0212129_11133	0.0980262	0.566654		Ga0212129_11133	0.129412	0.78174			Ga0212129_11133	-0.0044616	-0.0239009		Ga0212129_11133	0.127318	0.749702		Ga0212129_11133	0.0633222	0.414496			Ga0212129_11133	-0.0325757	-0.185908		Ga0212129_11133	0.0378605	0.222146		Ga0212129_11133	-0.0131466	-0.0791865
Ga0212129_111330	-0.394171	-1.56209		Ga0212129_111330	0.207476	0.971076		Ga0212129_111330	-0.10289	-0.364948			Ga0212129_111330	-0.119463	-0.684582		Ga0212129_111330	-0.0175212	-0.102271		Ga0212129_111330	-0.201151	-1.16406			Ga0212129_111330	-0.238983	-1.26257		Ga0212129_111330	-0.279989	-1.43509		Ga0212129_111330	-0.0939927	-0.538439			Ga0212129_111330	-0.206317	-1.01179		Ga0212129_111330	-0.273327	-1.47653		Ga0212129_111330	-0.162004	-0.91635
Ga0212129_111331	-0.146167	-0.482102		Ga0212129_111331	0.115835	0.385739		Ga0212129_111331	0.543135	1.92059			Ga0212129_111331	0.30632	1.36954		Ga0212129_111331	0.200003	0.8968		Ga0212129_111331	0.148296	0.664679			Ga0212129_111331	0.271387	1.21976		Ga0212129_111331	0.340014	1.50766		Ga0212129_111331	0.369906	1.60622			Ga0212129_111331	0.091087	0.407072		Ga0212129_111331	0.183538	0.809609		Ga0212129_111331	0.336135	1.49192
Ga0212129_111332	0.0735533	0.297607		Ga0212129_111332	-0.753613	-2.94927		Ga0212129_111332	0.29926	1.57558			Ga0212129_111332	0.00409809	0.0234088		Ga0212129_111332	-0.111731	-0.563249		Ga0212129_111332	-0.052701	-0.227962			Ga0212129_111332	-0.0734714	-0.378343		Ga0212129_111332	0.0177247	0.0896156		Ga0212129_111332	-0.166182	-0.81089			Ga0212129_111332	-0.0226869	-0.106857		Ga0212129_111332	-0.0928003	-0.408973		Ga0212129_111332	0.0183896	0.085351
Ga0212129_111333	-0.0623507	-0.286071		Ga0212129_111333	0.00828351	0.037712		Ga0212129_111333	0.101464	0.57538			Ga0212129_111333	0.0151514	0.0936947		Ga0212129_111333	-0.0578361	-0.329718		Ga0212129_111333	0.00207765	0.0129695			Ga0212129_111333	0.0056668	0.0290538		Ga0212129_111333	0.060588	0.35226		Ga0212129_111333	0.0385726	0.205113			Ga0212129_111333	-0.0320544	-0.176752		Ga0212129_111333	-0.0860535	-0.525281		Ga0212129_111333	0.0454584	0.277863
Ga0212129_111335	0.0855964	0.374471		Ga0212129_111335	-0.211455	-0.789993		Ga0212129_111335	-0.199671	-0.75454			Ga0212129_111335	0.0966708	0.529278		Ga0212129_111335	0.066599	0.332015		Ga0212129_111335	0.0833408	0.418897			Ga0212129_111335	0.0805346	0.389802		Ga0212129_111335	-0.0384397	-0.186005		Ga0212129_111335	0.0716779	0.31172			Ga0212129_111335	0.141922	0.640977		Ga0212129_111335	0.0891742	0.452032		Ga0212129_111335	-0.0576892	-0.316574
Ga0212129_111336	-0.0471032	-0.244529		Ga0212129_111336	0.173834	0.705211		Ga0212129_111336	0.177287	0.864134			Ga0212129_111336	0.141196	0.725125		Ga0212129_111336	0.127128	0.59525		Ga0212129_111336	0.15421	0.793223			Ga0212129_111336	0.159598	0.930463		Ga0212129_111336	0.16572	0.890058		Ga0212129_111336	0.147397	0.726633			Ga0212129_111336	0.12748	0.599917		Ga0212129_111336	0.282574	1.35082		Ga0212129_111336	0.105745	0.552392
Ga0212129_111337	0.0871989	0.303016		Ga0212129_111337	-0.710934	-2.50485		Ga0212129_111337	-0.0102289	-0.0322165			Ga0212129_111337	-0.285644	-1.23942		Ga0212129_111337	-0.498384	-2.04757		Ga0212129_111337	-0.514906	-2.20677			Ga0212129_111337	-0.444787	-1.98475		Ga0212129_111337	-0.334684	-1.30419		Ga0212129_111337	-0.478537	-2.32203			Ga0212129_111337	-0.406968	-1.53188		Ga0212129_111337	-0.406249	-1.55924		Ga0212129_111337	-0.260699	-1.077
Ga0212129_111338	0.0410004	0.132896		Ga0212129_111338	0.400531	0.975893		Ga0212129_111338	-0.545856	-1.60327			Ga0212129_111338	-0.00793564	-0.0280529		Ga0212129_111338	0.204364	0.672878		Ga0212129_111338	0.00210931	0.00606311			Ga0212129_111338	0.204864	0.612687		Ga0212129_111338	0.0528897	0.191565		Ga0212129_111338	-0.0202374	-0.0566847			Ga0212129_111338	0.00600014	0.0177255		Ga0212129_111338	0.127481	0.404419		Ga0212129_111338	0.185499	0.506326
Ga0212129_111339	-0.104315	-0.265544		Ga0212129_111339	-0.400329	-0.81486		Ga0212129_111339	-0.0536819	-0.153163			Ga0212129_111339	-0.641753	-2.3961		Ga0212129_111339	-0.607867	-1.87438		Ga0212129_111339	-0.466586	-1.3382			Ga0212129_111339	-0.550012	-2.09691		Ga0212129_111339	-0.732658	-2.15987		Ga0212129_111339	-0.644943	-1.92873			Ga0212129_111339	-0.616573	-2.08739		Ga0212129_111339	-0.655448	-2.23135		Ga0212129_111339	-0.310817	-0.957735
Ga0212129_11134	-0.0737418	-0.272638		Ga0212129_11134	0.0026745	0.00969279		Ga0212129_11134	-0.380253	-1.31714			Ga0212129_11134	0.0345815	0.153603		Ga0212129_11134	-0.111554	-0.451826		Ga0212129_11134	0.00247629	0.00964199			Ga0212129_11134	0.0492467	0.213544		Ga0212129_11134	-0.262913	-0.946472		Ga0212129_11134	-0.0287796	-0.124607			Ga0212129_11134	-0.13656	-0.597603		Ga0212129_11134	0.0195582	0.0727634		Ga0212129_11134	-0.0327532	-0.126504
Ga0212129_111340	-0.477475	-2.11484		Ga0212129_111340	-1.34355	-5.7983		Ga0212129_111340	-0.814211	-3.62515			Ga0212129_111340	-0.446536	-2.7252		Ga0212129_111340	-1.00392	-5.92607		Ga0212129_111340	-0.412672	-2.54297			Ga0212129_111340	0.0989337	0.628297		Ga0212129_111340	-0.593426	-3.18495		Ga0212129_111340	-0.578848	-3.40339			Ga0212129_111340	-0.44996	-2.74404		Ga0212129_111340	-0.626099	-3.74169		Ga0212129_111340	-0.65691	-3.894
Ga0212129_111342	0.299505	0.917663		Ga0212129_111342	0.0430036	0.127653		Ga0212129_111342	-0.0741828	-0.266366			Ga0212129_111342	0.132966	0.445573		Ga0212129_111342	0.170512	0.731866		Ga0212129_111342	-0.0117214	-0.0504258			Ga0212129_111342	-0.0185907	-0.0777909		Ga0212129_111342	-0.0275322	-0.123565		Ga0212129_111342	-0.0446568	-0.231607			Ga0212129_111342	0.00029306	0.00117563		Ga0212129_111342	0.062364	0.292145		Ga0212129_111342	0.0583814	0.229084
Ga0212129_111343	-0.490847	-1.31054		Ga0212129_111343	-0.00703975	-0.0179533		Ga0212129_111343	-0.124384	-0.364527			Ga0212129_111343	-0.213925	-0.884819		Ga0212129_111343	-0.198503	-0.695144		Ga0212129_111343	0.0129159	0.0526787			Ga0212129_111343	-0.0146838	-0.0652109		Ga0212129_111343	-0.0465755	-0.197598		Ga0212129_111343	-0.136894	-0.442992			Ga0212129_111343	-0.291217	-1.31773		Ga0212129_111343	-0.0170106	-0.0671483		Ga0212129_111343	-0.33721	-1.30948
Ga0212129_111344	-0.304582	-1.56153		Ga0212129_111344	-0.565894	-2.04896		Ga0212129_111344	-1.0218	-3.7476			Ga0212129_111344	-0.190779	-1.23353		Ga0212129_111344	-0.657546	-4.17374		Ga0212129_111344	-0.597445	-3.67993			Ga0212129_111344	-0.17701	-1.06026		Ga0212129_111344	-0.771198	-4.67645		Ga0212129_111344	-0.475138	-3.06592			Ga0212129_111344	-0.176035	-1.10324		Ga0212129_111344	-0.742104	-4.57703		Ga0212129_111344	-0.887807	-5.12534
Ga0212129_111345	-0.25858	-0.828064		Ga0212129_111345	-0.336883	-0.986422		Ga0212129_111345	0.0772758	0.243114			Ga0212129_111345	-0.273981	-1.16903		Ga0212129_111345	-0.037684	-0.147852		Ga0212129_111345	-0.0117214	-0.0414985			Ga0212129_111345	-0.262138	-1.0438		Ga0212129_111345	-0.132867	-0.65398		Ga0212129_111345	-0.0976635	-0.426684			Ga0212129_111345	-0.0850909	-0.375041		Ga0212129_111345	-0.272293	-1.19271		Ga0212129_111345	-0.150298	-0.658688
Ga0212129_111346	0.0198193	0.122191		Ga0212129_111346	0.293745	1.55928		Ga0212129_111346	0.0213615	0.119624			Ga0212129_111346	0.0842634	0.522632		Ga0212129_111346	0.086975	0.568073		Ga0212129_111346	0.0771444	0.477715			Ga0212129_111346	0.122365	0.802976		Ga0212129_111346	0.125696	0.757944		Ga0212129_111346	0.171039	1.05448			Ga0212129_111346	0.143163	0.95982		Ga0212129_111346	0.106734	0.709563		Ga0212129_111346	-0.0133598	-0.0816859
Ga0212129_111348	-0.0410063	-0.08661		Ga0212129_111348	0.50297	1.39295		Ga0212129_111348	0.326935	0.592789			Ga0212129_111348	0.0572921	0.157348		Ga0212129_111348	-0.058243	-0.163311		Ga0212129_111348	0.0203234	0.0662927			Ga0212129_111348	-0.0147165	-0.0380684		Ga0212129_111348	-0.0739363	-0.180651		Ga0212129_111348	-0.181131	-0.482309			Ga0212129_111348	-0.0158821	-0.0490252		Ga0212129_111348	-0.239161	-0.55421		Ga0212129_111348	-0.0677761	-0.191898
Ga0212129_11135	-0.106995	-0.588807		Ga0212129_11135	0.392638	1.67192		Ga0212129_11135	-0.0552521	-0.228471			Ga0212129_11135	-0.0256929	-0.137511		Ga0212129_11135	0.104476	0.589731		Ga0212129_11135	0.0993483	0.547061			Ga0212129_11135	-0.105042	-0.566822		Ga0212129_11135	0.153025	0.854813		Ga0212129_11135	0.00581253	0.0315345			Ga0212129_11135	-0.0437178	-0.238978		Ga0212129_11135	0.117665	0.690849		Ga0212129_11135	-0.0524381	-0.28837
Ga0212129_111351	-0.326549	-1.29501		Ga0212129_111351	-0.633625	-2.55706		Ga0212129_111351	-0.269839	-1.14136			Ga0212129_111351	-0.391327	-2.13222		Ga0212129_111351	-0.21466	-1.07499		Ga0212129_111351	-0.393499	-2.02486			Ga0212129_111351	-0.35077	-1.6516		Ga0212129_111351	-0.36188	-1.87113		Ga0212129_111351	-0.464509	-2.3317			Ga0212129_111351	-0.27246	-1.47492		Ga0212129_111351	-0.481145	-2.3295		Ga0212129_111351	-0.424091	-2.0952
Ga0212129_111353	-0.344235	-0.674164		Ga0212129_111353	-0.259088	-0.619572		Ga0212129_111353	-0.565444	-0.851688			Ga0212129_111353	-0.577043	-1.60391		Ga0212129_111353	-0.839607	-2.27342		Ga0212129_111353	-0.889154	-2.15913			Ga0212129_111353	-0.632441	-1.70722		Ga0212129_111353	-0.687574	-2.39302		Ga0212129_111353	-0.893655	-3.17188			Ga0212129_111353	-0.626337	-1.68771		Ga0212129_111353	-0.508479	-1.4562		Ga0212129_111353	-1.00402	-3.0369
Ga0212129_111355	-0.788512	-2.87791		Ga0212129_111355	-0.967864	-3.25119		Ga0212129_111355	-0.530684	-1.78249			Ga0212129_111355	-0.791116	-4.09387		Ga0212129_111355	-0.758829	-3.52282		Ga0212129_111355	-0.662432	-3.28509			Ga0212129_111355	-0.521554	-2.80061		Ga0212129_111355	-0.670725	-3.43835		Ga0212129_111355	-0.907686	-4.75472			Ga0212129_111355	-0.552035	-2.45517		Ga0212129_111355	-0.753654	-3.85462		Ga0212129_111355	-0.813046	-4.13658
Ga0212129_111356	-0.580331	-2.91264		Ga0212129_111356	-0.539928	-2.88773		Ga0212129_111356	-0.727607	-3.56413			Ga0212129_111356	-0.656798	-4.68418		Ga0212129_111356	-0.744411	-5.15052		Ga0212129_111356	-0.564469	-4.10609			Ga0212129_111356	-0.563507	-3.91992		Ga0212129_111356	-0.636605	-4.30733		Ga0212129_111356	-0.706881	-4.84654			Ga0212129_111356	-0.678966	-4.81442		Ga0212129_111356	-0.648675	-4.59932		Ga0212129_111356	-0.62744	-4.37525
Ga0212129_111357	0.0813406	0.255203		Ga0212129_111357	-0.511568	-1.3077		Ga0212129_111357	-0.472342	-0.837177			Ga0212129_111357	0.0116436	0.038151		Ga0212129_111357	-0.357435	-1.17259		Ga0212129_111357	0.025246	0.0772319			Ga0212129_111357	0.0849544	0.237964		Ga0212129_111357	-0.223131	-0.518443		Ga0212129_111357	0.206185	0.616604			Ga0212129_111357	-0.312433	-0.811243		Ga0212129_111357	-0.178634	-0.493156		Ga0212129_111357	0.34175	0.956261
Ga0212129_111358	-0.797345	-3.49206		Ga0212129_111358	-0.79652	-3.0265		Ga0212129_111358	-0.113671	-0.512919			Ga0212129_111358	-0.581708	-3.49224		Ga0212129_111358	-0.465957	-2.63277		Ga0212129_111358	-0.479662	-2.87645			Ga0212129_111358	-0.636041	-3.41273		Ga0212129_111358	-0.34707	-1.94923		Ga0212129_111358	-0.429845	-2.618			Ga0212129_111358	-0.491064	-2.77394		Ga0212129_111358	-0.575986	-3.28449		Ga0212129_111358	-0.662726	-3.56084
Ga0212129_111359	-0.624146	-1.61766		Ga0212129_111359	-0.418896	-1.11468		Ga0212129_111359	-0.601009	-1.7833			Ga0212129_111359	-0.289214	-1.46664		Ga0212129_111359	-0.430281	-1.95123		Ga0212129_111359	-0.385382	-1.50578			Ga0212129_111359	-0.446313	-2.02387		Ga0212129_111359	-0.353177	-1.62398		Ga0212129_111359	-0.394969	-1.92101			Ga0212129_111359	-0.18744	-0.733295		Ga0212129_111359	-0.303833	-1.39559		Ga0212129_111359	-0.189305	-0.886101
Ga0212129_11136	-0.234353	-1.19194		Ga0212129_11136	0.137132	0.654016		Ga0212129_11136	-0.0637504	-0.319023			Ga0212129_11136	-0.256804	-1.47547		Ga0212129_11136	-0.166559	-0.985053		Ga0212129_11136	-0.0380304	-0.234622			Ga0212129_11136	-0.149869	-0.868709		Ga0212129_11136	-0.109792	-0.651362		Ga0212129_11136	-0.114629	-0.658551			Ga0212129_11136	-0.369185	-2.10561		Ga0212129_11136	-0.112275	-0.66036		Ga0212129_11136	-0.179076	-1.01914
Ga0212129_111360	-0.113011	-0.563118		Ga0212129_111360	-0.257249	-1.1946		Ga0212129_111360	-0.0779482	-0.440605			Ga0212129_111360	-0.312765	-1.91116		Ga0212129_111360	-0.116724	-0.69537		Ga0212129_111360	-0.30525	-1.90586			Ga0212129_111360	-0.318405	-1.95668		Ga0212129_111360	-0.20984	-1.24604		Ga0212129_111360	-0.206822	-1.20186			Ga0212129_111360	-0.300742	-1.79784		Ga0212129_111360	-0.322465	-2.0914		Ga0212129_111360	-0.336595	-2.03054
Ga0212129_111361	-0.463787	-3.81519		Ga0212129_111361	-0.325575	-2.48085		Ga0212129_111361	-0.330469	-2.66812			Ga0212129_111361	-0.455845	-4.02469		Ga0212129_111361	-0.361245	-3.15768		Ga0212129_111361	-0.354612	-3.11143			Ga0212129_111361	-0.440207	-3.86765		Ga0212129_111361	-0.359472	-3.1558		Ga0212129_111361	-0.390943	-3.46217			Ga0212129_111361	-0.457733	-4.02592		Ga0212129_111361	-0.409065	-3.58118		Ga0212129_111361	-0.398947	-3.5016
Ga0212129_111362	0.131878	0.248361		Ga0212129_111362	0.450287	0.814938		Ga0212129_111362	0.468227	0.724185			Ga0212129_111362	0.105391	0.273744		Ga0212129_111362	-0.114944	-0.290713		Ga0212129_111362	-0.16099	-0.518202			Ga0212129_111362	-0.0315712	-0.107122		Ga0212129_111362	0.126724	0.299045		Ga0212129_111362	0.196213	0.397094			Ga0212129_111362	-0.110848	-0.257855		Ga0212129_111362	-0.142434	-0.430294		Ga0212129_111362	0.0707831	0.182115
Ga0212129_111363	-0.029126	-0.125696		Ga0212129_111363	-0.111602	-0.462264		Ga0212129_111363	-0.0890943	-0.369739			Ga0212129_111363	0.162555	0.809507		Ga0212129_111363	0.199939	1.04652		Ga0212129_111363	0.199311	0.957117			Ga0212129_111363	0.142935	0.744479		Ga0212129_111363	0.16509	0.74708		Ga0212129_111363	0.0658014	0.305849			Ga0212129_111363	-0.0409002	-0.177211		Ga0212129_111363	0.0418896	0.211288		Ga0212129_111363	0.065686	0.292457
Ga0212129_111364	0.226633	1.25405		Ga0212129_111364	0.0177284	0.0894221		Ga0212129_111364	0.0285803	0.14831			Ga0212129_111364	0.0789685	0.512334		Ga0212129_111364	0.232104	1.6294		Ga0212129_111364	0.22861	1.62828			Ga0212129_111364	0.110196	0.785774		Ga0212129_111364	0.199652	1.33684		Ga0212129_111364	0.145109	0.968919			Ga0212129_111364	0.167898	1.13872		Ga0212129_111364	0.11535	0.790424		Ga0212129_111364	0.178532	1.24462
Ga0212129_111365	-0.830031	-2.39035		Ga0212129_111365	-0.874207	-2.28647		Ga0212129_111365	-0.747095	-2.27852			Ga0212129_111365	-0.457561	-1.97126		Ga0212129_111365	-0.436931	-1.84844		Ga0212129_111365	-0.463426	-1.88186			Ga0212129_111365	-0.621833	-2.86952		Ga0212129_111365	-0.760623	-2.84447		Ga0212129_111365	-0.604227	-2.63899			Ga0212129_111365	-0.445674	-1.94651		Ga0212129_111365	-0.667834	-2.6049		Ga0212129_111365	-0.539088	-2.16148
Ga0212129_111368	-0.0580588	-0.383176		Ga0212129_111368	0.0553247	0.325536		Ga0212129_111368	-0.165692	-1.10513			Ga0212129_111368	-0.240832	-1.89089		Ga0212129_111368	-0.181453	-1.35451		Ga0212129_111368	-0.278993	-2.07749			Ga0212129_111368	-0.100337	-0.7806		Ga0212129_111368	-0.184415	-1.3344		Ga0212129_111368	-0.354081	-2.69953			Ga0212129_111368	-0.0828312	-0.623311		Ga0212129_111368	-0.223604	-1.66667		Ga0212129_111368	-0.262823	-2.01945
Ga0212129_11137	0.125924	0.589964		Ga0212129_11137	0.178422	0.660976		Ga0212129_11137	0.284065	1.33565			Ga0212129_11137	0.0648831	0.369774		Ga0212129_11137	0.10294	0.517748		Ga0212129_11137	0.060414	0.338105			Ga0212129_11137	0.27654	1.59794		Ga0212129_11137	0.31433	1.73863		Ga0212129_11137	0.16355	0.946696			Ga0212129_11137	0.138359	0.796782		Ga0212129_11137	0.160728	0.914272		Ga0212129_11137	0.168373	0.84882
Ga0212129_111370	-0.263076	-1.62049		Ga0212129_111370	-0.503689	-2.58655		Ga0212129_111370	-0.147711	-0.882138			Ga0212129_111370	-0.515805	-3.38833		Ga0212129_111370	-0.238806	-1.60387		Ga0212129_111370	-0.348169	-2.47809			Ga0212129_111370	-0.474241	-3.32505		Ga0212129_111370	-0.403297	-2.88015		Ga0212129_111370	-0.466907	-3.37256			Ga0212129_111370	-0.474424	-3.46646		Ga0212129_111370	-0.369309	-2.61429		Ga0212129_111370	-0.236746	-1.81922
Ga0212129_111372	-0.900597	-2.36134		Ga0212129_111372	0.293295	0.943276		Ga0212129_111372	0.0917715	0.287347			Ga0212129_111372	-0.258508	-1.10196		Ga0212129_111372	-0.113257	-0.378892		Ga0212129_111372	-0.196842	-0.533248			Ga0212129_111372	-0.413192	-1.44996		Ga0212129_111372	-0.188074	-0.612409		Ga0212129_111372	-0.228582	-0.898865			Ga0212129_111372	-0.372684	-1.23051		Ga0212129_111372	-0.130727	-0.476399		Ga0212129_111372	-0.185444	-0.57934
Ga0212129_111373	-0.0541635	-0.164817		Ga0212129_111373	0.640591	1.85787		Ga0212129_111373	-0.0140205	-0.0503608			Ga0212129_111373	-0.0740993	-0.275017		Ga0212129_111373	0.215018	0.762358		Ga0212129_111373	0.119118	0.451136			Ga0212129_111373	0.0558069	0.220519		Ga0212129_111373	0.100712	0.420652		Ga0212129_111373	0.114661	0.45879			Ga0212129_111373	0.17659	0.637647		Ga0212129_111373	-0.038752	-0.139809		Ga0212129_111373	0.120123	0.468701
Ga0212129_111374	-1.48044	-6.42276		Ga0212129_111374	-1.76759	-5.77288		Ga0212129_111374	-0.546779	-2.55562			Ga0212129_111374	-1.85522	-10.271		Ga0212129_111374	-1.80888	-9.88369		Ga0212129_111374	-0.443019	-2.65253			Ga0212129_111374	-1.62886	-9.54271		Ga0212129_111374	-1.08868	-5.83367		Ga0212129_111374	-0.447768	-2.56117			Ga0212129_111374	-1.38957	-8.02482		Ga0212129_111374	-0.46582	-2.672		Ga0212129_111374	-0.353852	-2.17584
Ga0212129_111375	-0.0590798	-0.183759		Ga0212129_111375	-0.247522	-1.23565		Ga0212129_111375	-0.288584	-1.18763			Ga0212129_111375	-0.19354	-1.0279		Ga0212129_111375	-0.0262217	-0.132178		Ga0212129_111375	-0.244603	-1.19625			Ga0212129_111375	-0.16586	-0.896849		Ga0212129_111375	0.0334942	0.172725		Ga0212129_111375	-0.0817609	-0.403982			Ga0212129_111375	-0.139386	-0.702262		Ga0212129_111375	-0.158091	-0.70267		Ga0212129_111375	-0.050832	-0.273002
Ga0212129_111378	-0.230957	-1.07877		Ga0212129_111378	0.0175671	0.0737689		Ga0212129_111378	-0.364587	-1.39031			Ga0212129_111378	-0.215393	-1.11325		Ga0212129_111378	-0.0846613	-0.479191		Ga0212129_111378	-0.102777	-0.581633			Ga0212129_111378	-0.321873	-1.71624		Ga0212129_111378	0.0129399	0.0728431		Ga0212129_111378	-0.0367293	-0.195919			Ga0212129_111378	-0.176333	-0.907797		Ga0212129_111378	-0.0995242	-0.496729		Ga0212129_111378	-0.0862911	-0.439383
Ga0212129_11138	0.292021	1.55434		Ga0212129_11138	0.324128	1.45471		Ga0212129_11138	-0.048037	-0.231183			Ga0212129_11138	0.402632	2.06007		Ga0212129_11138	0.414066	2.15055		Ga0212129_11138	0.341905	1.67708			Ga0212129_11138	0.255201	1.29732		Ga0212129_11138	0.352939	1.91968		Ga0212129_11138	0.217542	1.07999			Ga0212129_11138	0.118379	0.588069		Ga0212129_11138	0.283383	1.41326		Ga0212129_11138	0.237749	1.23156
Ga0212129_111380	0.0285672	0.168227		Ga0212129_111380	0.00164801	0.00853529		Ga0212129_111380	-0.0517422	-0.312178			Ga0212129_111380	0.00804443	0.0609124		Ga0212129_111380	-0.0342522	-0.232603		Ga0212129_111380	-0.0413717	-0.29653			Ga0212129_111380	-0.0305931	-0.211742		Ga0212129_111380	0.0138584	0.0951098		Ga0212129_111380	0.0921719	0.644424			Ga0212129_111380	0.0152717	0.109451		Ga0212129_111380	0.00340246	0.0238217		Ga0212129_111380	-0.0223203	-0.154219
Ga0212129_111381	-0.0278756	-0.156756		Ga0212129_111381	-0.369411	-1.81835		Ga0212129_111381	0.01297	0.0794458			Ga0212129_111381	-0.191228	-1.27364		Ga0212129_111381	-0.0401	-0.261829		Ga0212129_111381	-0.0665439	-0.416279			Ga0212129_111381	-0.104941	-0.63188		Ga0212129_111381	-0.125438	-0.709524		Ga0212129_111381	0.0121847	0.073042			Ga0212129_111381	-0.0776676	-0.452426		Ga0212129_111381	-0.0245593	-0.147895		Ga0212129_111381	0.00241953	0.0154878
Ga0212129_111383	-0.050069	-0.280477		Ga0212129_111383	-0.0059712	-0.0351141		Ga0212129_111383	-0.0857517	-0.454802			Ga0212129_111383	0.00653621	0.045685		Ga0212129_111383	-0.0139028	-0.086627		Ga0212129_111383	0.0121441	0.0757211			Ga0212129_111383	-0.032939	-0.211284		Ga0212129_111383	0.013863	0.0834215		Ga0212129_111383	0.0178995	0.107522			Ga0212129_111383	-0.00663617	-0.0415847		Ga0212129_111383	0.0565109	0.349902		Ga0212129_111383	0.0536918	0.338103
Ga0212129_111384	-0.095675	-0.230114		Ga0212129_111384	-0.296645	-0.608993		Ga0212129_111384	0.0531601	0.125371			Ga0212129_111384	-0.701376	-1.80278		Ga0212129_111384	0.040897	0.0993507		Ga0212129_111384	-0.597403	-1.74498			Ga0212129_111384	-0.403577	-0.834069		Ga0212129_111384	-0.21422	-0.655382		Ga0212129_111384	-0.443503	-1.08076			Ga0212129_111384	-0.241602	-0.629693		Ga0212129_111384	-0.284525	-0.761169		Ga0212129_111384	-0.207997	-0.618324
Ga0212129_111385	0.0760385	0.313762		Ga0212129_111385	-0.320349	-1.42885		Ga0212129_111385	-0.124583	-0.476252			Ga0212129_111385	-0.130555	-0.677645		Ga0212129_111385	-0.0948805	-0.537775		Ga0212129_111385	-0.195673	-1.00879			Ga0212129_111385	-0.108555	-0.564563		Ga0212129_111385	-0.124604	-0.707487		Ga0212129_111385	-0.112404	-0.584826			Ga0212129_111385	-0.152933	-0.856419		Ga0212129_111385	-0.0259514	-0.134012		Ga0212129_111385	-0.197044	-0.999659
Ga0212129_111387	-0.432846	-2.08471		Ga0212129_111387	-0.124384	-0.432795		Ga0212129_111387	-0.244899	-0.909507			Ga0212129_111387	-0.235152	-1.27147		Ga0212129_111387	-0.27848	-1.6267		Ga0212129_111387	-0.251175	-1.49004			Ga0212129_111387	-0.379189	-2.14849		Ga0212129_111387	-0.357816	-1.77242		Ga0212129_111387	-0.277598	-1.49718			Ga0212129_111387	-0.405953	-2.02309		Ga0212129_111387	-0.444672	-2.38103		Ga0212129_111387	-0.351299	-2.03855
Ga0212129_111388	-0.425997	-2.11664		Ga0212129_111388	0.0152113	0.0704337		Ga0212129_111388	0.0326973	0.14526			Ga0212129_111388	-0.145265	-0.846053		Ga0212129_111388	-0.223984	-1.18212		Ga0212129_111388	-0.0110722	-0.0661562			Ga0212129_111388	-0.188418	-1.119		Ga0212129_111388	0.00336568	0.0189562		Ga0212129_111388	-0.066147	-0.373599			Ga0212129_111388	-0.0828844	-0.463326		Ga0212129_111388	0.0108504	0.0659719		Ga0212129_111388	-0.0252571	-0.131497
Ga0212129_111389	0.236359	0.733917		Ga0212129_111389	0.410314	1.17009		Ga0212129_111389	0.190344	0.629507			Ga0212129_111389	-0.0428785	-0.151455		Ga0212129_111389	0.197823	0.678788		Ga0212129_111389	-0.0117214	-0.0370499			Ga0212129_111389	-0.144304	-0.512868		Ga0212129_111389	0.209054	0.721214		Ga0212129_111389	-0.069029	-0.289152			Ga0212129_111389	0.00565683	0.0180178		Ga0212129_111389	0.101898	0.336124		Ga0212129_111389	0.139069	0.491924
Ga0212129_111391	-0.710107	-3.38022		Ga0212129_111391	-0.530654	-2.45494		Ga0212129_111391	0.127258	0.6093			Ga0212129_111391	0.0550062	0.31273		Ga0212129_111391	0.11837	0.631062		Ga0212129_111391	0.0646313	0.307355			Ga0212129_111391	0.00500269	0.0286844		Ga0212129_111391	0.0159074	0.0804385		Ga0212129_111391	-0.0350776	-0.179879			Ga0212129_111391	0.109541	0.567043		Ga0212129_111391	-0.0408846	-0.191841		Ga0212129_111391	-0.0190866	-0.100321
Ga0212129_111392	0.314399	0.958975		Ga0212129_111392	0.201625	0.912999		Ga0212129_111392	-0.075743	-0.271087			Ga0212129_111392	0.0873329	0.356531		Ga0212129_111392	0.096003	0.462701		Ga0212129_111392	0.0584993	0.261769			Ga0212129_111392	0.115425	0.577906		Ga0212129_111392	0.251797	1.29662		Ga0212129_111392	0.14464	0.656995			Ga0212129_111392	0.134992	0.614877		Ga0212129_111392	0.182221	0.842527		Ga0212129_111392	0.169438	0.723623
Ga0212129_111393	0.317545	1.17946		Ga0212129_111393	-0.14033	-0.388791		Ga0212129_111393	0.294121	0.975031			Ga0212129_111393	0.104561	0.393503		Ga0212129_111393	0.583469	1.99306		Ga0212129_111393	0.309456	1.06956			Ga0212129_111393	0.165592	0.637648		Ga0212129_111393	0.177461	0.614221		Ga0212129_111393	0.267479	0.865979			Ga0212129_111393	0.243453	0.859724		Ga0212129_111393	0.0299924	0.128172		Ga0212129_111393	0.275551	1.11749
Ga0212129_111395	-0.273452	-1.29738		Ga0212129_111395	0.163696	0.683928		Ga0212129_111395	-0.479102	-1.95067			Ga0212129_111395	0.0876424	0.51025		Ga0212129_111395	-0.0138551	-0.0801906		Ga0212129_111395	-0.124586	-0.728582			Ga0212129_111395	-0.0732877	-0.44827		Ga0212129_111395	-0.0459704	-0.245756		Ga0212129_111395	-0.131837	-0.812564			Ga0212129_111395	-0.0485086	-0.280726		Ga0212129_111395	-0.0829288	-0.495672		Ga0212129_111395	-0.101349	-0.585718
Ga0212129_111399	-0.0385284	-0.0683084		Ga0212129_111399	-0.481531	-0.987154		Ga0212129_111399	-0.163036	-0.249261			Ga0212129_111399	-0.309585	-0.597954		Ga0212129_111399	-0.369511	-0.821229		Ga0212129_111399	-0.438022	-0.795257			Ga0212129_111399	-0.376005	-0.781475		Ga0212129_111399	-0.793907	-1.51903		Ga0212129_111399	-0.381515	-0.832562			Ga0212129_111399	-0.0645782	-0.136521		Ga0212129_111399	-0.526879	-0.8647		Ga0212129_111399	-0.521609	-0.993526
Ga0212129_11140	0.199977	0.929633		Ga0212129_11140	0.377332	1.41687		Ga0212129_11140	0.209871	0.874619			Ga0212129_11140	0.362026	2.0619		Ga0212129_11140	0.292214	1.49408		Ga0212129_11140	0.330699	1.85246			Ga0212129_11140	0.240868	1.24854		Ga0212129_11140	0.34367	1.7639		Ga0212129_11140	0.215986	1.19412			Ga0212129_11140	0.359256	1.89747		Ga0212129_11140	0.381623	2.15769		Ga0212129_11140	0.274156	1.47062
Ga0212129_111401	-0.195044	-0.759621		Ga0212129_111401	-0.505064	-1.50173		Ga0212129_111401	-0.312181	-0.867855			Ga0212129_111401	-0.225718	-0.938881		Ga0212129_111401	-0.29733	-1.27604		Ga0212129_111401	-0.209046	-0.860979			Ga0212129_111401	-0.291468	-1.27099		Ga0212129_111401	-0.438328	-1.64503		Ga0212129_111401	-0.241944	-0.959294			Ga0212129_111401	-0.320301	-1.45361		Ga0212129_111401	-0.235086	-0.917309		Ga0212129_111401	-0.121102	-0.492683
Ga0212129_111402	-0.0718426	-0.558823		Ga0212129_111402	-0.16791	-1.20813		Ga0212129_111402	-0.129494	-1.00597			Ga0212129_111402	-0.0613847	-0.50525		Ga0212129_111402	-0.0819776	-0.677018		Ga0212129_111402	-0.0407474	-0.335388			Ga0212129_111402	-0.130314	-1.07769		Ga0212129_111402	-0.135414	-1.10687		Ga0212129_111402	-0.0948958	-0.794004			Ga0212129_111402	-0.182825	-1.53415		Ga0212129_111402	-0.0986952	-0.814373		Ga0212129_111402	-0.0190977	-0.159159
Ga0212129_111404	-0.435827	-3.01353		Ga0212129_111404	-0.763834	-4.26758		Ga0212129_111404	-0.280521	-1.59755			Ga0212129_111404	-0.63329	-4.67381		Ga0212129_111404	-0.534275	-3.89822		Ga0212129_111404	-0.138212	-0.982496			Ga0212129_111404	-0.47162	-3.44522		Ga0212129_111404	-0.29615	-2.19399		Ga0212129_111404	-0.0993612	-0.737876			Ga0212129_111404	-0.618825	-4.47899		Ga0212129_111404	-0.063095	-0.468686		Ga0212129_111404	-0.115307	-0.845378
Ga0212129_111405	-0.0849755	-0.353429		Ga0212129_111405	0.0313699	0.183613		Ga0212129_111405	0.219869	0.960223			Ga0212129_111405	0.124279	0.751234		Ga0212129_111405	0.327654	2.02789		Ga0212129_111405	0.25248	1.4954			Ga0212129_111405	-0.0789881	-0.482313		Ga0212129_111405	0.130873	0.79422		Ga0212129_111405	0.0640505	0.350894			Ga0212129_111405	0.0729009	0.467133		Ga0212129_111405	0.0927111	0.577243		Ga0212129_111405	0.256091	1.57888
Ga0212129_111406	-0.359326	-1.02896		Ga0212129_111406	-0.610664	-1.37276		Ga0212129_111406	0.142184	0.423882			Ga0212129_111406	-0.733752	-2.78153		Ga0212129_111406	-0.360961	-1.14734		Ga0212129_111406	-0.0309349	-0.116723			Ga0212129_111406	-0.525296	-1.99563		Ga0212129_111406	-0.140349	-0.552919		Ga0212129_111406	0.00323681	0.0147937			Ga0212129_111406	-0.313782	-0.960173		Ga0212129_111406	-0.147708	-0.556659		Ga0212129_111406	0.0650889	0.252667
Ga0212129_111407	-0.179691	-0.812226		Ga0212129_111407	0.0245389	0.123923		Ga0212129_111407	0.0511572	0.303302			Ga0212129_111407	-0.111897	-0.683481		Ga0212129_111407	0.0638487	0.358251		Ga0212129_111407	-0.00330891	-0.0192462			Ga0212129_111407	-0.0170111	-0.11292		Ga0212129_111407	-0.0697919	-0.434025		Ga0212129_111407	-0.00193281	-0.011951			Ga0212129_111407	-0.00631143	-0.0373767		Ga0212129_111407	-0.137654	-0.807651		Ga0212129_111407	-0.16567	-1.00739
Ga0212129_111408	-0.0570761	-0.391594		Ga0212129_111408	0.0395008	0.269989		Ga0212129_111408	0.0340787	0.241926			Ga0212129_111408	0.0311495	0.23623		Ga0212129_111408	0.16932	1.31824		Ga0212129_111408	0.100563	0.773051			Ga0212129_111408	0.040149	0.316297		Ga0212129_111408	0.144276	1.09954		Ga0212129_111408	0.0945476	0.741088			Ga0212129_111408	0.087902	0.675107		Ga0212129_111408	0.0937065	0.719374		Ga0212129_111408	0.134043	1.05519
Ga0212129_11141	-0.354273	-1.11855		Ga0212129_11141	-0.290757	-0.764173		Ga0212129_11141	-0.1237	-0.326605			Ga0212129_11141	0.0509681	0.247609		Ga0212129_11141	-0.0499711	-0.237135		Ga0212129_11141	0.100711	0.491572			Ga0212129_11141	-0.00383357	-0.0149189		Ga0212129_11141	0.0570364	0.264213		Ga0212129_11141	0.0377858	0.163732			Ga0212129_11141	0.150601	0.705211		Ga0212129_11141	0.150746	0.591886		Ga0212129_11141	-0.0609224	-0.21553
Ga0212129_111410	0.021704	0.1437		Ga0212129_111410	-0.0852661	-0.546748		Ga0212129_111410	-0.147062	-1.04172			Ga0212129_111410	-0.0119221	-0.0935868		Ga0212129_111410	0.140086	1.09439		Ga0212129_111410	0.0259378	0.195832			Ga0212129_111410	-0.00159162	-0.0121696		Ga0212129_111410	0.153941	1.20237		Ga0212129_111410	0.0764952	0.579888			Ga0212129_111410	-0.00262927	-0.0198245		Ga0212129_111410	0.0591584	0.454932		Ga0212129_111410	0.0501868	0.390073
Ga0212129_111411	0.144031	0.784058		Ga0212129_111411	0.206787	1.10329		Ga0212129_111411	-0.132301	-0.661743			Ga0212129_111411	0.0110446	0.0690318		Ga0212129_111411	0.0276556	0.16713		Ga0212129_111411	0.0891647	0.566068			Ga0212129_111411	0.000404822	0.00240997		Ga0212129_111411	0.129522	0.782265		Ga0212129_111411	-0.0013227	-0.00834674			Ga0212129_111411	0.0189773	0.116314		Ga0212129_111411	0.0990692	0.60977		Ga0212129_111411	0.120446	0.767108
Ga0212129_111412	0.00734953	0.0343777		Ga0212129_111412	-0.0997386	-0.405482		Ga0212129_111412	0.214037	1.05436			Ga0212129_111412	-0.0657901	-0.364194		Ga0212129_111412	0.0730501	0.381605		Ga0212129_111412	-0.0820863	-0.411745			Ga0212129_111412	0.0142059	0.0713029		Ga0212129_111412	0.0105096	0.053995		Ga0212129_111412	-0.0147979	-0.0737805			Ga0212129_111412	-0.0618727	-0.347635		Ga0212129_111412	0.0379271	0.204351		Ga0212129_111412	0.060473	0.341166
Ga0212129_111414	-0.0307273	-0.149187		Ga0212129_111414	-0.133172	-0.62001		Ga0212129_111414	-0.289782	-1.45098			Ga0212129_111414	-0.354717	-2.38264		Ga0212129_111414	-0.386983	-2.39284		Ga0212129_111414	-0.316042	-2.10244			Ga0212129_111414	-0.373009	-2.33445		Ga0212129_111414	-0.252684	-1.61151		Ga0212129_111414	-0.370306	-2.33342			Ga0212129_111414	-0.387064	-2.51609		Ga0212129_111414	-0.236224	-1.56749		Ga0212129_111414	-0.290027	-1.83294
Ga0212129_111415	-0.0829156	-0.537495		Ga0212129_111415	-0.0866381	-0.493929		Ga0212129_111415	-0.123104	-0.703951			Ga0212129_111415	-0.0916106	-0.642815		Ga0212129_111415	0.0934352	0.605036		Ga0212129_111415	0.022346	0.148315			Ga0212129_111415	0.0123009	0.0890029		Ga0212129_111415	0.028681	0.193314		Ga0212129_111415	-0.00241715	-0.0172153			Ga0212129_111415	-0.0322198	-0.211678		Ga0212129_111415	-0.0362712	-0.252476		Ga0212129_111415	0.0252399	0.165019
Ga0212129_111416	-0.244443	-1.19161		Ga0212129_111416	-0.302433	-1.74972		Ga0212129_111416	0.103805	0.637624			Ga0212129_111416	-0.0869475	-0.586975		Ga0212129_111416	0.102951	0.671149		Ga0212129_111416	0.166316	1.14376			Ga0212129_111416	-0.00965508	-0.0597931		Ga0212129_111416	0.0714729	0.441315		Ga0212129_111416	-0.00142209	-0.00986479			Ga0212129_111416	0.067842	0.415939		Ga0212129_111416	0.0715016	0.455374		Ga0212129_111416	0.178952	1.27454
Ga0212129_111417	0.186562	0.920723		Ga0212129_111417	-0.0428549	-0.20432		Ga0212129_111417	0.153895	0.745371			Ga0212129_111417	0.214158	1.42571		Ga0212129_111417	0.238313	1.67206		Ga0212129_111417	0.1746	1.09727			Ga0212129_111417	0.245532	1.53957		Ga0212129_111417	0.231379	1.42458		Ga0212129_111417	0.239212	1.46798			Ga0212129_111417	0.117436	0.709888		Ga0212129_111417	0.23499	1.44456		Ga0212129_111417	0.221014	1.45138
Ga0212129_111418	-2.08276	-6.91367		Ga0212129_111418	-2.50702	-7.75056		Ga0212129_111418	-0.77992	-3.33452			Ga0212129_111418	-2.6158	-11.104		Ga0212129_111418	-2.67144	-11.821		Ga0212129_111418	-1.03915	-5.49061			Ga0212129_111418	-2.16657	-10.5483		Ga0212129_111418	-1.58541	-6.80654		Ga0212129_111418	-0.86644	-4.47466			Ga0212129_111418	-2.28073	-11.0908		Ga0212129_111418	-0.653484	-3.35028		Ga0212129_111418	-0.706716	-3.54456
Ga0212129_111419	-1.08904	-5.16776		Ga0212129_111419	-2.01533	-7.55966		Ga0212129_111419	-0.499581	-2.52468			Ga0212129_111419	-1.74629	-9.66061		Ga0212129_111419	-1.85942	-10.426		Ga0212129_111419	-0.442461	-2.49401			Ga0212129_111419	-1.56025	-8.85534		Ga0212129_111419	-0.773985	-4.57744		Ga0212129_111419	-0.536589	-3.18838			Ga0212129_111419	-1.56916	-8.9906		Ga0212129_111419	-0.482472	-3.07089		Ga0212129_111419	-0.344041	-2.20698
Ga0212129_11142	-0.447281	-1.3597		Ga0212129_11142	-0.0457058	-0.148665		Ga0212129_11142	0.243447	0.735037			Ga0212129_11142	-0.236592	-0.90537		Ga0212129_11142	-0.241688	-0.825504		Ga0212129_11142	-0.322615	-0.994554			Ga0212129_11142	-0.238962	-0.930242		Ga0212129_11142	-0.384035	-1.35974		Ga0212129_11142	-0.398391	-1.3029			Ga0212129_11142	-0.373227	-1.28078		Ga0212129_11142	-0.424432	-1.39623		Ga0212129_11142	-0.268795	-0.965415
Ga0212129_111420	-1.9541	-5.19936		Ga0212129_111420	-1.49931	-2.88464		Ga0212129_111420	-0.793306	-2.35194			Ga0212129_111420	-2.06438	-8.12775		Ga0212129_111420	-2.13404	-6.99853		Ga0212129_111420	-0.670378	-2.35147			Ga0212129_111420	-1.6486	-7.12275		Ga0212129_111420	-1.098	-4.16558		Ga0212129_111420	-0.709264	-2.75792			Ga0212129_111420	-1.41128	-5.4905		Ga0212129_111420	-0.736685	-2.75391		Ga0212129_111420	-0.568529	-2.31222
Ga0212129_111421	-1.75813	-5.85635		Ga0212129_111421	-1.91343	-6.37365		Ga0212129_111421	-0.93871	-3.56415			Ga0212129_111421	-1.76805	-8.07383		Ga0212129_111421	-2.00522	-9.25024		Ga0212129_111421	-0.674207	-3.56402			Ga0212129_111421	-1.40745	-7.03232		Ga0212129_111421	-1.14778	-5.80821		Ga0212129_111421	-0.586487	-3.13948			Ga0212129_111421	-1.57147	-7.75217		Ga0212129_111421	-0.533606	-2.85082		Ga0212129_111421	-0.417541	-2.2798
Ga0212129_111422	-1.26471	-4.26608		Ga0212129_111422	-0.918743	-2.85023		Ga0212129_111422	-0.56871	-2.01246			Ga0212129_111422	-1.62488	-7.1022		Ga0212129_111422	-1.89376	-8.10851		Ga0212129_111422	-0.41642	-2.06242			Ga0212129_111422	-1.46995	-6.34505		Ga0212129_111422	-0.936678	-4.43312		Ga0212129_111422	-0.347538	-1.55126			Ga0212129_111422	-1.48861	-6.37468		Ga0212129_111422	-0.288933	-1.33184		Ga0212129_111422	-0.54206	-2.235
Ga0212129_111423	-0.297302	-2.15157		Ga0212129_111423	-0.354294	-2.55985		Ga0212129_111423	-0.174239	-1.29477			Ga0212129_111423	-0.219747	-1.8017		Ga0212129_111423	-0.235051	-1.88785		Ga0212129_111423	-0.213381	-1.72092			Ga0212129_111423	-0.308529	-2.54326		Ga0212129_111423	-0.305638	-2.41286		Ga0212129_111423	-0.345134	-2.7877			Ga0212129_111423	-0.176507	-1.40596		Ga0212129_111423	-0.267543	-2.13505		Ga0212129_111423	-0.186798	-1.53743
Ga0212129_111424	-0.279183	-1.59758		Ga0212129_111424	0.0521628	0.308688		Ga0212129_111424	0.0479952	0.276745			Ga0212129_111424	-0.10085	-0.672702		Ga0212129_111424	-0.0719596	-0.482428		Ga0212129_111424	-0.0740319	-0.501295			Ga0212129_111424	-0.0938306	-0.65112		Ga0212129_111424	-0.160562	-1.05188		Ga0212129_111424	-0.126766	-0.804059			Ga0212129_111424	-0.0716785	-0.463707		Ga0212129_111424	-0.171011	-1.08638		Ga0212129_111424	-0.107558	-0.715017
Ga0212129_111426	0.125623	0.599765		Ga0212129_111426	0.0386333	0.171649		Ga0212129_111426	0.204795	0.954526			Ga0212129_111426	0.160239	0.895822		Ga0212129_111426	0.221642	1.30564		Ga0212129_111426	0.273432	1.47274			Ga0212129_111426	0.135581	0.748995		Ga0212129_111426	0.277726	1.71726		Ga0212129_111426	0.259793	1.4437			Ga0212129_111426	0.239587	1.24614		Ga0212129_111426	0.25138	1.40878		Ga0212129_111426	0.123932	0.675211
Ga0212129_111427	0.125636	0.714695		Ga0212129_111427	0.0683126	0.366059		Ga0212129_111427	-0.0678279	-0.421822			Ga0212129_111427	0.0296685	0.204204		Ga0212129_111427	0.0445336	0.305336		Ga0212129_111427	0.114145	0.770476			Ga0212129_111427	0.130708	0.897848		Ga0212129_111427	0.167578	1.11727		Ga0212129_111427	0.0960439	0.650502			Ga0212129_111427	0.142475	0.938993		Ga0212129_111427	0.0937412	0.639313		Ga0212129_111427	0.178593	1.26286
Ga0212129_111429	0.146126	1.01841		Ga0212129_111429	0.0694597	0.43324		Ga0212129_111429	0.184547	1.17801			Ga0212129_111429	0.0710594	0.52515		Ga0212129_111429	0.0248529	0.180754		Ga0212129_111429	0.0552815	0.408361			Ga0212129_111429	-0.00231988	-0.0180573		Ga0212129_111429	0.0932475	0.670997		Ga0212129_111429	0.139586	1.02899			Ga0212129_111429	0.0490555	0.359613		Ga0212129_111429	0.0673593	0.497873		Ga0212129_111429	0.0569443	0.420276
Ga0212129_11143	0.0807085	0.576062		Ga0212129_11143	-0.141344	-0.893633		Ga0212129_11143	0.0915636	0.611002			Ga0212129_11143	0.00753263	0.0548097		Ga0212129_11143	0.142722	1.0192		Ga0212129_11143	0.153989	1.08431			Ga0212129_11143	0.0579863	0.418249		Ga0212129_11143	0.142447	1.03658		Ga0212129_11143	0.056572	0.413514			Ga0212129_11143	0.0928118	0.683695		Ga0212129_11143	0.0528614	0.390119		Ga0212129_11143	0.0759607	0.561845
Ga0212129_111430	-0.0395673	-0.197668		Ga0212129_111430	-0.128319	-0.592215		Ga0212129_111430	0.0781808	0.42772			Ga0212129_111430	-0.0411871	-0.247309		Ga0212129_111430	0.0212444	0.128625		Ga0212129_111430	-0.0591241	-0.343926			Ga0212129_111430	0.0383118	0.240389		Ga0212129_111430	0.0469455	0.266586		Ga0212129_111430	-0.00395476	-0.0254282			Ga0212129_111430	-0.0872183	-0.5135		Ga0212129_111430	-0.081523	-0.487084		Ga0212129_111430	0.0126085	0.0765388
Ga0212129_111431	0.189503	0.69057		Ga0212129_111431	0.15188	0.489303		Ga0212129_111431	0.224154	0.704374			Ga0212129_111431	0.127964	0.533542		Ga0212129_111431	0.160534	0.641407		Ga0212129_111431	0.12359	0.58826			Ga0212129_111431	-0.0148576	-0.067696		Ga0212129_111431	0.0812212	0.338905		Ga0212129_111431	0.104196	0.453555			Ga0212129_111431	0.174766	0.739742		Ga0212129_111431	0.165899	0.748998		Ga0212129_111431	0.17455	0.738749
Ga0212129_111432	-0.679265	-2.14316		Ga0212129_111432	-1.08924	-2.45547		Ga0212129_111432	-0.710601	-2.44923			Ga0212129_111432	-0.470707	-1.59044		Ga0212129_111432	-0.469942	-1.49793		Ga0212129_111432	-0.527985	-1.76427			Ga0212129_111432	-0.477431	-1.71053		Ga0212129_111432	-0.413578	-1.31507		Ga0212129_111432	-0.566171	-2.1846			Ga0212129_111432	-0.41366	-1.32649		Ga0212129_111432	-0.427598	-1.27361		Ga0212129_111432	-0.599985	-1.80875
Ga0212129_111433	0.00590658	0.0299761		Ga0212129_111433	-0.21302	-1.06809		Ga0212129_111433	-0.0518675	-0.281835			Ga0212129_111433	-0.0296824	-0.182756		Ga0212129_111433	0.0389101	0.219771		Ga0212129_111433	0.0313683	0.183475			Ga0212129_111433	-0.0523641	-0.304063		Ga0212129_111433	0.00268413	0.0145134		Ga0212129_111433	0.000117477	0.00068379			Ga0212129_111433	-0.0665961	-0.366115		Ga0212129_111433	0.068155	0.390613		Ga0212129_111433	0.101341	0.648858
Ga0212129_111434	0.0878073	0.630855		Ga0212129_111434	-0.169951	-1.10086		Ga0212129_111434	-0.0650359	-0.45866			Ga0212129_111434	-0.0692502	-0.53747		Ga0212129_111434	0.0173266	0.133897		Ga0212129_111434	0.0154669	0.114817			Ga0212129_111434	-0.0128253	-0.100002		Ga0212129_111434	-0.0619309	-0.465963		Ga0212129_111434	-0.0155361	-0.117326			Ga0212129_111434	0.036076	0.267187		Ga0212129_111434	0.0343325	0.254765		Ga0212129_111434	0.048199	0.356551
Ga0212129_111435	-0.301947	-1.62134		Ga0212129_111435	-0.37322	-2.24344		Ga0212129_111435	0.115979	0.579363			Ga0212129_111435	-0.215042	-1.53475		Ga0212129_111435	-0.220272	-1.505		Ga0212129_111435	-0.223345	-1.44482			Ga0212129_111435	-0.205569	-1.38558		Ga0212129_111435	-0.160542	-1.08014		Ga0212129_111435	-0.156498	-1.05404			Ga0212129_111435	-0.198372	-1.31493		Ga0212129_111435	-0.186059	-1.26255		Ga0212129_111435	-0.189804	-1.30406
Ga0212129_111436	0.310244	1.59538		Ga0212129_111436	0.125511	0.637876		Ga0212129_111436	0.144427	0.870222			Ga0212129_111436	0.107321	0.743794		Ga0212129_111436	0.164977	1.13725		Ga0212129_111436	0.11695	0.765326			Ga0212129_111436	0.0226757	0.149937		Ga0212129_111436	0.0856482	0.57403		Ga0212129_111436	0.0773282	0.519727			Ga0212129_111436	0.0658762	0.435048		Ga0212129_111436	0.118743	0.787936		Ga0212129_111436	0.166155	1.15897
Ga0212129_111437	-1.27825	-3.31418		Ga0212129_111437	0.460406	0.996984		Ga0212129_111437	-0.353088	-0.876784			Ga0212129_111437	-0.610235	-1.86963		Ga0212129_111437	-0.660096	-1.88727		Ga0212129_111437	-0.746895	-2.51785			Ga0212129_111437	-0.665923	-2.49753		Ga0212129_111437	-0.840915	-2.60476		Ga0212129_111437	-0.541968	-1.52783			Ga0212129_111437	-0.43982	-1.53673		Ga0212129_111437	-0.584924	-1.63391		Ga0212129_111437	-0.731439	-2.09566
Ga0212129_111438	-0.0435185	-0.193984		Ga0212129_111438	-0.0915308	-0.408996		Ga0212129_111438	-0.0585405	-0.270638			Ga0212129_111438	-0.376337	-1.99229		Ga0212129_111438	-0.13959	-0.805605		Ga0212129_111438	-0.0296547	-0.149784			Ga0212129_111438	-0.168948	-0.85038		Ga0212129_111438	-0.1935	-0.998192		Ga0212129_111438	-0.124635	-0.646713			Ga0212129_111438	-0.291914	-1.40377		Ga0212129_111438	-0.184028	-0.887431		Ga0212129_111438	-0.0981837	-0.513666
Ga0212129_111439	-0.0941503	-0.370283		Ga0212129_111439	0.162765	0.779063		Ga0212129_111439	0.039854	0.175933			Ga0212129_111439	-0.0323121	-0.161537		Ga0212129_111439	-0.0165139	-0.0865429		Ga0212129_111439	0.004732	0.0259452			Ga0212129_111439	-0.0604411	-0.327198		Ga0212129_111439	0.00328567	0.0165612		Ga0212129_111439	0.00357417	0.0183694			Ga0212129_111439	0.0141753	0.0671153		Ga0212129_111439	0.200218	1.0867		Ga0212129_111439	0.0773257	0.396496
Ga0212129_11144	-0.169653	-0.671541		Ga0212129_11144	-0.158024	-0.749991		Ga0212129_11144	0.225193	0.884795			Ga0212129_11144	0.222775	1.4029		Ga0212129_11144	0.312386	1.90352		Ga0212129_11144	0.359198	1.94308			Ga0212129_11144	0.171015	0.996284		Ga0212129_11144	0.289399	1.61696		Ga0212129_11144	0.229992	1.22207			Ga0212129_11144	0.198022	1.15483		Ga0212129_11144	0.229801	1.29992		Ga0212129_11144	0.14578	0.753358
Ga0212129_111442	-0.288762	-0.640779		Ga0212129_111442	-0.502438	-1.1047		Ga0212129_111442	-0.468392	-1.50916			Ga0212129_111442	-0.570154	-1.5263		Ga0212129_111442	-0.538393	-1.42219		Ga0212129_111442	-0.37564	-1.23247			Ga0212129_111442	-0.537235	-1.69666		Ga0212129_111442	-0.45087	-1.62677		Ga0212129_111442	-0.352267	-1.30316			Ga0212129_111442	-0.536238	-1.49145		Ga0212129_111442	-0.54076	-1.81227		Ga0212129_111442	-0.607509	-1.77242
Ga0212129_111444	0.0710939	0.279845		Ga0212129_111444	0.147172	0.355364		Ga0212129_111444	0.413004	1.65785			Ga0212129_111444	0.0200384	0.0919657		Ga0212129_111444	-0.0584892	-0.277137		Ga0212129_111444	-0.252473	-1.224			Ga0212129_111444	-0.062886	-0.263447		Ga0212129_111444	-0.316706	-1.48728		Ga0212129_111444	-0.092724	-0.375817			Ga0212129_111444	-0.210386	-0.888729		Ga0212129_111444	0.0706816	0.341888		Ga0212129_111444	-0.184107	-0.736132
Ga0212129_111445	0.00898719	0.022877		Ga0212129_111445	0.343545	1.28817		Ga0212129_111445	0.708823	2.56252			Ga0212129_111445	0.066507	0.283818		Ga0212129_111445	0.328003	1.44653		Ga0212129_111445	0.295413	1.30564			Ga0212129_111445	-0.0983091	-0.419813		Ga0212129_111445	0.105045	0.447362		Ga0212129_111445	0.279515	1.07599			Ga0212129_111445	0.267362	1.16271		Ga0212129_111445	0.235627	0.841008		Ga0212129_111445	0.148855	0.636084
Ga0212129_111446	-0.0335928	-0.0961064		Ga0212129_111446	-0.242941	-0.436275		Ga0212129_111446	-0.448914	-1.05637			Ga0212129_111446	-0.153056	-0.588033		Ga0212129_111446	-0.131024	-0.545959		Ga0212129_111446	-0.24921	-0.98691			Ga0212129_111446	-0.416596	-1.49121		Ga0212129_111446	-0.185462	-0.780179		Ga0212129_111446	-0.197709	-0.748879			Ga0212129_111446	-0.331521	-1.41228		Ga0212129_111446	-0.155784	-0.660675		Ga0212129_111446	-0.290625	-1.21532
Ga0212129_111448	-0.0844094	-0.442877		Ga0212129_111448	-0.277928	-1.22332		Ga0212129_111448	-0.0344906	-0.15185			Ga0212129_111448	-0.295921	-1.82916		Ga0212129_111448	-0.187685	-1.12878		Ga0212129_111448	-0.195933	-1.15561			Ga0212129_111448	-0.377088	-2.27863		Ga0212129_111448	-0.299909	-1.81676		Ga0212129_111448	-0.223339	-1.38595			Ga0212129_111448	-0.32011	-1.93378		Ga0212129_111448	-0.212841	-1.31562		Ga0212129_111448	-0.344751	-2.05124
Ga0212129_111449	-0.16	-0.318236		Ga0212129_111449	-0.992577	-2.35191		Ga0212129_111449	-0.777128	-1.4536			Ga0212129_111449	-1.0245	-3.41177		Ga0212129_111449	-0.487513	-1.63133		Ga0212129_111449	-0.940037	-2.41479			Ga0212129_111449	-0.898418	-2.61332		Ga0212129_111449	-0.875593	-2.94485		Ga0212129_111449	-0.707489	-1.86649			Ga0212129_111449	-0.897323	-2.45057		Ga0212129_111449	-0.542994	-1.89803		Ga0212129_111449	-0.919727	-2.32596
Ga0212129_11145	-0.254028	-1.06737		Ga0212129_11145	-0.0478115	-0.210094		Ga0212129_11145	-0.399209	-1.65768			Ga0212129_11145	-0.0940045	-0.517518		Ga0212129_11145	-0.199308	-1.1837		Ga0212129_11145	-0.132327	-0.861927			Ga0212129_11145	-0.421107	-2.5852		Ga0212129_11145	-0.220792	-1.28444		Ga0212129_11145	-0.241408	-1.4754			Ga0212129_11145	-0.269834	-1.56526		Ga0212129_11145	-0.125785	-0.740964		Ga0212129_11145	-0.17885	-0.932625
Ga0212129_111450	0.143515	0.461503		Ga0212129_111450	0.0702282	0.146695		Ga0212129_111450	0.274936	0.944997			Ga0212129_111450	-0.0423618	-0.13958		Ga0212129_111450	0.172371	0.612896		Ga0212129_111450	0.0706539	0.216735			Ga0212129_111450	0.0378576	0.171403		Ga0212129_111450	0.205401	0.739153		Ga0212129_111450	0.139737	0.616094			Ga0212129_111450	0.0493358	0.161897		Ga0212129_111450	0.193264	0.801013		Ga0212129_111450	0.0828146	0.311799
Ga0212129_111452	-0.252413	-1.11671		Ga0212129_111452	-0.319843	-0.990842		Ga0212129_111452	-0.176483	-0.725977			Ga0212129_111452	-0.430668	-2.60636		Ga0212129_111452	-0.295933	-1.59431		Ga0212129_111452	-0.388381	-2.22209			Ga0212129_111452	-0.493669	-2.57638		Ga0212129_111452	-0.242907	-1.33175		Ga0212129_111452	-0.383397	-2.11813			Ga0212129_111452	-0.530493	-3.18242		Ga0212129_111452	-0.405642	-2.15359		Ga0212129_111452	-0.381006	-2.30863
Ga0212129_111454	0.132275	0.372041		Ga0212129_111454	-0.369256	-0.777032		Ga0212129_111454	-0.479933	-1.53585			Ga0212129_111454	-0.383213	-1.69059		Ga0212129_111454	-0.119644	-0.494614		Ga0212129_111454	-0.206128	-0.921905			Ga0212129_111454	-0.413856	-1.95976		Ga0212129_111454	-0.297598	-1.35699		Ga0212129_111454	-0.419246	-1.92747			Ga0212129_111454	-0.27891	-0.997368		Ga0212129_111454	-0.0816513	-0.401648		Ga0212129_111454	-0.0851354	-0.387246
Ga0212129_111458	0.374594	1.59123		Ga0212129_111458	0.337854	1.4517		Ga0212129_111458	0.410192	1.78126			Ga0212129_111458	0.163766	0.718221		Ga0212129_111458	0.275084	1.29726		Ga0212129_111458	0.434868	1.77583			Ga0212129_111458	0.290911	1.34769		Ga0212129_111458	0.272865	1.21095		Ga0212129_111458	0.394454	1.75137			Ga0212129_111458	0.377264	1.84617		Ga0212129_111458	0.358084	1.59815		Ga0212129_111458	0.272571	1.38537
Ga0212129_111459	0.513331	0.930883		Ga0212129_111459	0.270363	0.368029		Ga0212129_111459	0.367836	0.767786			Ga0212129_111459	0.144829	0.28957		Ga0212129_111459	0.224336	0.385042		Ga0212129_111459	0.212967	0.434093			Ga0212129_111459	-0.0371733	-0.0711792		Ga0212129_111459	-0.0727118	-0.113055		Ga0212129_111459	0.0802173	0.140883			Ga0212129_111459	-0.10614	-0.191606		Ga0212129_111459	0.0176758	0.0312386		Ga0212129_111459	-0.038525	-0.0749279
Ga0212129_11146	-0.0447911	-0.292687		Ga0212129_11146	-0.0479799	-0.277732		Ga0212129_11146	0.167802	1.07773			Ga0212129_11146	0.100177	0.711572		Ga0212129_11146	0.125621	0.889225		Ga0212129_11146	0.12539	0.898731			Ga0212129_11146	-0.000434722	-0.00286941		Ga0212129_11146	0.107353	0.748		Ga0212129_11146	0.108935	0.768409			Ga0212129_11146	0.0643997	0.443292		Ga0212129_11146	0.166906	1.11569		Ga0212129_11146	0.0736425	0.505422
Ga0212129_111460	-0.00212014	-0.0125292		Ga0212129_111460	-0.148397	-0.737223		Ga0212129_111460	-0.00362702	-0.0204188			Ga0212129_111460	-0.137758	-0.821858		Ga0212129_111460	-0.137343	-0.814238		Ga0212129_111460	-0.0721311	-0.450019			Ga0212129_111460	-0.189375	-1.1684		Ga0212129_111460	-0.0475779	-0.285542		Ga0212129_111460	-0.209489	-1.28277			Ga0212129_111460	-0.197734	-1.27502		Ga0212129_111460	-0.106256	-0.633585		Ga0212129_111460	-0.164973	-1.02827
Ga0212129_111462	0.0095575	0.0382053		Ga0212129_111462	0.114324	0.398813		Ga0212129_111462	-0.0120537	-0.0416459			Ga0212129_111462	-0.195351	-0.936089		Ga0212129_111462	-0.278425	-1.14547		Ga0212129_111462	-0.158156	-0.666089			Ga0212129_111462	-0.231632	-1.06325		Ga0212129_111462	-0.141415	-0.667685		Ga0212129_111462	-0.106342	-0.512691			Ga0212129_111462	-0.214244	-0.935513		Ga0212129_111462	-0.121346	-0.585669		Ga0212129_111462	0.0565433	0.247647
Ga0212129_111463	0.458277	1.9603		Ga0212129_111463	0.244262	0.85574		Ga0212129_111463	-0.440217	-1.87256			Ga0212129_111463	0.0720866	0.387139		Ga0212129_111463	0.258003	1.25959		Ga0212129_111463	0.256952	1.27487			Ga0212129_111463	0.107119	0.544611		Ga0212129_111463	0.281094	1.38304		Ga0212129_111463	0.339989	1.55581			Ga0212129_111463	0.0547902	0.252196		Ga0212129_111463	0.346018	1.57824		Ga0212129_111463	0.32122	1.63042
Ga0212129_111464	0.108033	0.409744		Ga0212129_111464	0.048728	0.186617		Ga0212129_111464	0.660578	2.71031			Ga0212129_111464	0.0266103	0.111659		Ga0212129_111464	0.239875	1.03139		Ga0212129_111464	0.356413	1.72965			Ga0212129_111464	0.159225	0.660053		Ga0212129_111464	0.31284	1.48105		Ga0212129_111464	0.43391	1.93307			Ga0212129_111464	0.30034	1.23213		Ga0212129_111464	0.23866	1.07048		Ga0212129_111464	0.288999	1.36872
Ga0212129_111467	-0.157573	-1.06794		Ga0212129_111467	0.115572	0.750806		Ga0212129_111467	0.271159	1.78403			Ga0212129_111467	-0.0184461	-0.146949		Ga0212129_111467	0.0714591	0.534246		Ga0212129_111467	0.139412	1.02451			Ga0212129_111467	-0.00812435	-0.0611021		Ga0212129_111467	0.197513	1.41784		Ga0212129_111467	0.0327641	0.24492			Ga0212129_111467	0.0579254	0.434186		Ga0212129_111467	0.0788134	0.597728		Ga0212129_111467	0.107649	0.821728
Ga0212129_11147	-0.199357	-0.458373		Ga0212129_11147	-1.18519	-3.50434		Ga0212129_11147	-0.419812	-0.979918			Ga0212129_11147	-0.396841	-1.50818		Ga0212129_11147	-0.376842	-1.34545		Ga0212129_11147	-0.0326542	-0.111907			Ga0212129_11147	-0.283454	-1.07859		Ga0212129_11147	-0.487744	-2.01695		Ga0212129_11147	-0.304407	-1.01117			Ga0212129_11147	-0.474263	-1.81303		Ga0212129_11147	-0.574035	-1.8019		Ga0212129_11147	-0.215406	-0.771994
Ga0212129_111472	-0.149245	-0.803526		Ga0212129_111472	0.477942	2.15868		Ga0212129_111472	0.307054	1.44269			Ga0212129_111472	0.0860249	0.485288		Ga0212129_111472	0.251286	1.49612		Ga0212129_111472	0.250956	1.42483			Ga0212129_111472	-0.093486	-0.526066		Ga0212129_111472	0.10746	0.622326		Ga0212129_111472	0.195162	1.10292			Ga0212129_111472	-0.00438901	-0.0251782		Ga0212129_111472	0.246876	1.38984		Ga0212129_111472	0.240232	1.3839
Ga0212129_111474	-0.206816	-0.500878		Ga0212129_111474	-0.499035	-1.44804		Ga0212129_111474	-0.451148	-1.20244			Ga0212129_111474	-0.38816	-1.22876		Ga0212129_111474	-0.374327	-1.31828		Ga0212129_111474	0.0297021	0.0974492			Ga0212129_111474	-0.565933	-1.81164		Ga0212129_111474	-0.205469	-0.689874		Ga0212129_111474	-0.448541	-1.34469			Ga0212129_111474	-0.42644	-1.32947		Ga0212129_111474	-0.168576	-0.582315		Ga0212129_111474	-0.172279	-0.505021
Ga0212129_111476	-0.129235	-0.693114		Ga0212129_111476	0.13605	0.60253		Ga0212129_111476	-0.0840844	-0.434347			Ga0212129_111476	-0.166448	-0.867671		Ga0212129_111476	-0.170429	-0.875081		Ga0212129_111476	0.00913406	0.0501426			Ga0212129_111476	-0.27815	-1.50214		Ga0212129_111476	-0.0860608	-0.455745		Ga0212129_111476	-0.147586	-0.76035			Ga0212129_111476	-0.100831	-0.541752		Ga0212129_111476	-0.124193	-0.611135		Ga0212129_111476	-0.0521405	-0.264708
Ga0212129_111477	0.0855784	0.415852		Ga0212129_111477	0.103391	0.447963		Ga0212129_111477	0.380554	1.98117			Ga0212129_111477	0.14387	0.720274		Ga0212129_111477	0.325505	1.86073		Ga0212129_111477	0.352359	1.92803			Ga0212129_111477	0.1091	0.559024		Ga0212129_111477	0.280741	1.36966		Ga0212129_111477	0.255264	1.3489			Ga0212129_111477	0.163824	0.834492		Ga0212129_111477	0.244207	1.3381		Ga0212129_111477	0.215525	1.15284
Ga0212129_111478	-0.115954	-0.477447		Ga0212129_111478	0.0440652	0.139498		Ga0212129_111478	0.270744	1.00312			Ga0212129_111478	-0.220158	-1.03451		Ga0212129_111478	0.0571477	0.242266		Ga0212129_111478	0.302809	1.35303			Ga0212129_111478	-0.154848	-0.677635		Ga0212129_111478	0.106355	0.438733		Ga0212129_111478	0.0116705	0.0531677			Ga0212129_111478	-0.0439053	-0.18205		Ga0212129_111478	0.0848556	0.381561		Ga0212129_111478	0.102167	0.468744
Ga0212129_111479	-0.274387	-0.891009		Ga0212129_111479	0.164399	0.330247		Ga0212129_111479	-0.0056262	-0.0110287			Ga0212129_111479	-0.11884	-0.377874		Ga0212129_111479	-0.0833353	-0.234651		Ga0212129_111479	-0.0406825	-0.131342			Ga0212129_111479	-0.348194	-1.27072		Ga0212129_111479	-0.0023042	-0.009428		Ga0212129_111479	-0.262155	-1.07955			Ga0212129_111479	-0.110415	-0.273314		Ga0212129_111479	-0.0850396	-0.320348		Ga0212129_111479	-0.240449	-0.707291
Ga0212129_11148	0.0316612	0.12188		Ga0212129_11148	0.0994281	0.436945		Ga0212129_11148	0.227759	1.07791			Ga0212129_11148	-0.0414647	-0.225269		Ga0212129_11148	0.255868	1.27812		Ga0212129_11148	0.182182	0.969965			Ga0212129_11148	0.276799	1.56594		Ga0212129_11148	-0.0359566	-0.168202		Ga0212129_11148	0.123642	0.702544			Ga0212129_11148	0.227628	1.11568		Ga0212129_11148	0.18439	0.936392		Ga0212129_11148	0.179992	1.00853
Ga0212129_111480	-0.580798	-1.90793		Ga0212129_111480	-0.979995	-2.92826		Ga0212129_111480	-1.44281	-3.89478			Ga0212129_111480	-0.496603	-2.22002		Ga0212129_111480	-0.594277	-2.50595		Ga0212129_111480	-1.09378	-4.46738			Ga0212129_111480	-0.455189	-2.14464		Ga0212129_111480	-1.13287	-4.87013		Ga0212129_111480	-1.6603	-6.34439			Ga0212129_111480	-0.302533	-1.46889		Ga0212129_111480	-1.25271	-4.65734		Ga0212129_111480	-1.11397	-4.59992
Ga0212129_111482	-1.59305	-2.20835		Ga0212129_111482	-0.551283	-1.036		Ga0212129_111482	-0.500111	-0.934526			Ga0212129_111482	-1.23327	-3.00169		Ga0212129_111482	-1.02055	-2.86714		Ga0212129_111482	-0.473277	-0.954337			Ga0212129_111482	-1.34655	-3.42678		Ga0212129_111482	-0.568878	-1.16973		Ga0212129_111482	-0.722884	-1.83941			Ga0212129_111482	-0.922837	-2.19639		Ga0212129_111482	-1.02387	-2.81238		Ga0212129_111482	-1.06352	-2.89365
Ga0212129_111486	0.0910926	0.505449		Ga0212129_111486	-0.149149	-0.753951		Ga0212129_111486	-0.149928	-0.687054			Ga0212129_111486	-0.0119721	-0.0743611		Ga0212129_111486	-0.0735731	-0.46234		Ga0212129_111486	-0.143566	-0.814855			Ga0212129_111486	-0.0150773	-0.0914928		Ga0212129_111486	-0.0922	-0.560617		Ga0212129_111486	-0.123092	-0.750337			Ga0212129_111486	-0.0682885	-0.401781		Ga0212129_111486	0.0372488	0.229144		Ga0212129_111486	-0.10777	-0.653708
Ga0212129_111487	-0.75684	-1.77077		Ga0212129_111487	-0.406274	-1.39823		Ga0212129_111487	-0.281957	-0.66449			Ga0212129_111487	-0.531009	-1.83553		Ga0212129_111487	-0.606078	-2.20885		Ga0212129_111487	-0.787067	-2.69274			Ga0212129_111487	-0.636023	-2.22941		Ga0212129_111487	-0.637584	-2.3256		Ga0212129_111487	-0.643483	-2.69213			Ga0212129_111487	-0.553468	-2.31301		Ga0212129_111487	-0.786156	-2.8873		Ga0212129_111487	-0.775399	-2.70705
Ga0212129_111488	-0.594767	-1.68732		Ga0212129_111488	-0.472878	-1.5267		Ga0212129_111488	-0.623703	-1.20035			Ga0212129_111488	-0.377246	-1.33643		Ga0212129_111488	-0.317801	-1.21189		Ga0212129_111488	-0.406865	-1.31089			Ga0212129_111488	-0.53175	-1.93307		Ga0212129_111488	-0.440618	-1.8896		Ga0212129_111488	-0.469879	-1.57082			Ga0212129_111488	-0.442652	-1.73463		Ga0212129_111488	-0.0462385	-0.194513		Ga0212129_111488	-0.428255	-1.47719
Ga0212129_111489	-0.021732	-0.0919959		Ga0212129_111489	-0.0215318	-0.0977244		Ga0212129_111489	0.394413	1.89798			Ga0212129_111489	-0.245355	-1.25793		Ga0212129_111489	0.160213	0.994013		Ga0212129_111489	0.0997983	0.587941			Ga0212129_111489	-0.150915	-0.861424		Ga0212129_111489	0.105808	0.568348		Ga0212129_111489	0.0138022	0.0771323			Ga0212129_111489	-0.121469	-0.753174		Ga0212129_111489	0.0161908	0.0943963		Ga0212129_111489	0.0616889	0.35228
Ga0212129_11149	-0.0186406	-0.0667421		Ga0212129_11149	0.575939	2.07608		Ga0212129_11149	0.423246	1.70365			Ga0212129_11149	0.383213	1.8879		Ga0212129_11149	0.290413	1.38061		Ga0212129_11149	0.248998	1.23149			Ga0212129_11149	0.240345	1.17739		Ga0212129_11149	0.321822	1.42634		Ga0212129_11149	0.224015	1.05994			Ga0212129_11149	0.388798	1.90789		Ga0212129_11149	0.383544	1.84161		Ga0212129_11149	0.319882	1.55496
Ga0212129_111490	-0.30562	-1.1086		Ga0212129_111490	-0.233419	-0.982728		Ga0212129_111490	0.158752	0.667677			Ga0212129_111490	-0.13228	-0.654382		Ga0212129_111490	-0.0189276	-0.0887492		Ga0212129_111490	0.0881307	0.443227			Ga0212129_111490	-0.279641	-1.33108		Ga0212129_111490	-0.156466	-0.782564		Ga0212129_111490	0.0740149	0.365819			Ga0212129_111490	-0.189929	-0.862366		Ga0212129_111490	-0.123169	-0.604475		Ga0212129_111490	0.0438514	0.226146
Ga0212129_111492	-0.582824	-2.5514		Ga0212129_111492	0.340126	1.32926		Ga0212129_111492	0.286536	1.22386			Ga0212129_111492	-0.155914	-0.875272		Ga0212129_111492	-0.0424479	-0.233871		Ga0212129_111492	-0.0732648	-0.397151			Ga0212129_111492	-0.371584	-2.05244		Ga0212129_111492	-0.0991752	-0.459256		Ga0212129_111492	0.0988697	0.56685			Ga0212129_111492	-0.262471	-1.34437		Ga0212129_111492	-0.0463605	-0.244831		Ga0212129_111492	-0.146522	-0.768116
Ga0212129_111493	-0.280619	-1.61683		Ga0212129_111493	-0.376485	-2.08554		Ga0212129_111493	-0.0231251	-0.138262			Ga0212129_111493	-0.196031	-1.29829		Ga0212129_111493	-0.130415	-0.793051		Ga0212129_111493	-0.309212	-1.9131			Ga0212129_111493	-0.0450985	-0.28671		Ga0212129_111493	-0.0474348	-0.299096		Ga0212129_111493	-0.301395	-1.77114			Ga0212129_111493	-0.348082	-2.02588		Ga0212129_111493	-0.292278	-1.77361		Ga0212129_111493	-0.34727	-2.1684
Ga0212129_111494	-0.349883	-2.08369		Ga0212129_111494	0.0590744	0.387139		Ga0212129_111494	0.270977	1.60429			Ga0212129_111494	-0.231146	-1.62928		Ga0212129_111494	-0.0527948	-0.371543		Ga0212129_111494	0.0957855	0.69249			Ga0212129_111494	-0.253539	-1.82612		Ga0212129_111494	-0.0416141	-0.294272		Ga0212129_111494	0.0054979	0.0387642			Ga0212129_111494	-0.248292	-1.77734		Ga0212129_111494	0.029368	0.210688		Ga0212129_111494	0.0164273	0.119318
Ga0212129_111495	-0.547131	-1.86649		Ga0212129_111495	-0.107043	-0.355944		Ga0212129_111495	-0.510954	-1.73345			Ga0212129_111495	-0.222514	-1.01548		Ga0212129_111495	0.0426962	0.181937		Ga0212129_111495	-0.109755	-0.477243			Ga0212129_111495	-0.00784659	-0.0344671		Ga0212129_111495	0.149333	0.740319		Ga0212129_111495	-0.0687114	-0.276461			Ga0212129_111495	-0.0691471	-0.299061		Ga0212129_111495	-0.132778	-0.58449		Ga0212129_111495	-0.203364	-0.979122
Ga0212129_111496	-0.279671	-1.57216		Ga0212129_111496	-0.409018	-1.68973		Ga0212129_111496	-0.39936	-2.14931			Ga0212129_111496	-0.339834	-2.24258		Ga0212129_111496	-0.131742	-0.826721		Ga0212129_111496	-0.394645	-2.64383			Ga0212129_111496	-0.256446	-1.6166		Ga0212129_111496	-0.22513	-1.49549		Ga0212129_111496	-0.491343	-2.99401			Ga0212129_111496	-0.528122	-3.41729		Ga0212129_111496	-0.484424	-2.93926		Ga0212129_111496	-0.520027	-3.37466
Ga0212129_111497	-0.0511596	-0.263222		Ga0212129_111497	-0.256555	-1.24978		Ga0212129_111497	-0.119486	-0.577087			Ga0212129_111497	-0.24396	-1.55123		Ga0212129_111497	-0.0637149	-0.394237		Ga0212129_111497	-0.00912128	-0.0578662			Ga0212129_111497	-0.0487296	-0.306258		Ga0212129_111497	-0.0525501	-0.302256		Ga0212129_111497	-0.171816	-1.03639			Ga0212129_111497	-0.175948	-1.06895		Ga0212129_111497	-0.0838666	-0.515731		Ga0212129_111497	-0.236753	-1.37805
Ga0212129_111498	0.0500456	0.270881		Ga0212129_111498	0.0626716	0.326384		Ga0212129_111498	0.309428	1.64093			Ga0212129_111498	0.0701949	0.463301		Ga0212129_111498	0.300337	1.99914		Ga0212129_111498	0.385352	2.63153			Ga0212129_111498	-0.073465	-0.476964		Ga0212129_111498	0.303572	2.10698		Ga0212129_111498	0.300017	2.10257			Ga0212129_111498	0.00753786	0.045766		Ga0212129_111498	0.323337	2.20386		Ga0212129_111498	0.210598	1.27786
Ga0212129_111499	0.479616	1.47895		Ga0212129_111499	-0.0618834	-0.191858		Ga0212129_111499	0.105485	0.377359			Ga0212129_111499	-0.170271	-0.68913		Ga0212129_111499	0.00232111	0.0118984		Ga0212129_111499	0.121893	0.553398			Ga0212129_111499	-0.153824	-0.640768		Ga0212129_111499	0.0667431	0.336746		Ga0212129_111499	0.0909756	0.429959			Ga0212129_111499	-0.152126	-0.701415		Ga0212129_111499	0.245804	1.24713		Ga0212129_111499	0.0752005	0.379887
Ga0212129_11150	-0.442412	-1.28521		Ga0212129_11150	0.732163	2.75568		Ga0212129_11150	-0.136199	-0.442785			Ga0212129_11150	-0.00654531	-0.0302853		Ga0212129_11150	0.0187887	0.085585		Ga0212129_11150	0.173477	0.707767			Ga0212129_11150	0.112609	0.43046		Ga0212129_11150	0.0214372	0.0896255		Ga0212129_11150	0.233022	0.940703			Ga0212129_11150	-0.0312697	-0.141145		Ga0212129_11150	0.0553696	0.214863		Ga0212129_11150	-0.0301016	-0.122641
Ga0212129_111500	-0.138463	-0.3435		Ga0212129_111500	0.792196	1.48731		Ga0212129_111500	0.894282	2.38768			Ga0212129_111500	0.277288	0.737444		Ga0212129_111500	0.61888	1.54284		Ga0212129_111500	0.730667	1.72493			Ga0212129_111500	0.543282	1.56485		Ga0212129_111500	0.78452	1.84654		Ga0212129_111500	0.697498	1.56309			Ga0212129_111500	0.250605	0.603612		Ga0212129_111500	0.82749	2.26483		Ga0212129_111500	0.469716	1.17461
Ga0212129_111501	0.102067	0.299265		Ga0212129_111501	0.132883	0.357582		Ga0212129_111501	0.0989088	0.244653			Ga0212129_111501	0.036587	0.153246		Ga0212129_111501	0.228992	1.07228		Ga0212129_111501	0.183542	0.847882			Ga0212129_111501	-0.039573	-0.16936		Ga0212129_111501	0.168464	0.768486		Ga0212129_111501	0.303985	1.34359			Ga0212129_111501	-0.00561519	-0.025889		Ga0212129_111501	0.269648	1.24099		Ga0212129_111501	0.185055	0.847217
Ga0212129_111503	-0.353028	-0.97206		Ga0212129_111503	-0.363382	-1.01958		Ga0212129_111503	-0.257188	-0.838379			Ga0212129_111503	-0.492273	-1.68886		Ga0212129_111503	-0.368712	-1.639		Ga0212129_111503	-0.27095	-0.914053			Ga0212129_111503	-0.622373	-2.2477		Ga0212129_111503	-0.310342	-1.22221		Ga0212129_111503	-0.350786	-1.27049			Ga0212129_111503	-0.634429	-1.70681		Ga0212129_111503	-0.387671	-1.37229		Ga0212129_111503	-0.39212	-1.1972
Ga0212129_111504	-0.206367	-0.629124		Ga0212129_111504	-0.206089	-0.571017		Ga0212129_111504	-0.131857	-0.34608			Ga0212129_111504	-0.120031	-0.455625		Ga0212129_111504	0.128686	0.547882		Ga0212129_111504	0.315092	1.28435			Ga0212129_111504	0.150818	0.619629		Ga0212129_111504	-0.12572	-0.468382		Ga0212129_111504	0.319922	1.23543			Ga0212129_111504	-0.000438713	-0.00172625		Ga0212129_111504	-0.00464187	-0.0203887		Ga0212129_111504	-0.159567	-0.50897
Ga0212129_111505	-0.445062	-0.677134		Ga0212129_111505	0.0916174	0.180806		Ga0212129_111505	-0.843286	-1.54639			Ga0212129_111505	-0.656805	-1.92907		Ga0212129_111505	-0.104147	-0.330591		Ga0212129_111505	-0.0117214	-0.0366604			Ga0212129_111505	-0.152359	-0.484242		Ga0212129_111505	0.0433646	0.112977		Ga0212129_111505	-0.0100853	-0.0320351			Ga0212129_111505	-0.33529	-1.01907		Ga0212129_111505	0.146284	0.395656		Ga0212129_111505	-0.145065	-0.457377
Ga0212129_111506	-0.182417	-1.0163		Ga0212129_111506	0.134865	0.77054		Ga0212129_111506	0.283387	1.6825			Ga0212129_111506	-0.163116	-1.12823		Ga0212129_111506	0.0158308	0.107085		Ga0212129_111506	0.0601667	0.420311			Ga0212129_111506	-0.120129	-0.813894		Ga0212129_111506	-0.006166	-0.040897		Ga0212129_111506	0.0962664	0.688422			Ga0212129_111506	-0.164348	-1.14458		Ga0212129_111506	0.014221	0.0969215		Ga0212129_111506	0.0869538	0.627353
Ga0212129_111508	-0.723559	-3.72024		Ga0212129_111508	-1.68137	-6.89241		Ga0212129_111508	-1.79525	-8.35195			Ga0212129_111508	-1.05235	-7.29581		Ga0212129_111508	-1.69994	-10.3024		Ga0212129_111508	-2.01684	-12.5537			Ga0212129_111508	-0.450138	-3.14799		Ga0212129_111508	-1.17745	-8.15414		Ga0212129_111508	-1.49864	-9.78174			Ga0212129_111508	-1.14967	-7.66188		Ga0212129_111508	-2.30109	-12.7214		Ga0212129_111508	-2.46822	-14.3776
Ga0212129_111510	-0.0101348	-0.0589334		Ga0212129_111510	0.0822135	0.429234		Ga0212129_111510	-0.138548	-0.784043			Ga0212129_111510	0.137963	0.981967		Ga0212129_111510	-0.0058162	-0.0383147		Ga0212129_111510	-0.124922	-0.844682			Ga0212129_111510	-0.0373018	-0.258939		Ga0212129_111510	0.030549	0.217045		Ga0212129_111510	0.0299131	0.220567			Ga0212129_111510	-0.0870762	-0.542428		Ga0212129_111510	-0.0405312	-0.270455		Ga0212129_111510	-0.090133	-0.641692
Ga0212129_111511	-1.39414	-4.20196		Ga0212129_111511	-2.18384	-5.58193		Ga0212129_111511	-0.874691	-2.63323			Ga0212129_111511	-1.88554	-7.4189		Ga0212129_111511	-1.91953	-7.91764		Ga0212129_111511	-1.25635	-5.1397			Ga0212129_111511	-1.62345	-6.57173		Ga0212129_111511	-1.95694	-7.41949		Ga0212129_111511	-1.33262	-4.92847			Ga0212129_111511	-1.74051	-6.5513		Ga0212129_111511	-1.44425	-6.11389		Ga0212129_111511	-1.30631	-5.66536
Ga0212129_11152	-0.0861449	-0.553173		Ga0212129_11152	0.155604	0.974237		Ga0212129_11152	-0.0631474	-0.38369			Ga0212129_11152	-0.0647077	-0.460536		Ga0212129_11152	0.0437159	0.3052		Ga0212129_11152	-0.0279878	-0.195091			Ga0212129_11152	-0.0225563	-0.160413		Ga0212129_11152	0.0533027	0.365345		Ga0212129_11152	-0.0190794	-0.133279			Ga0212129_11152	-0.0539558	-0.364414		Ga0212129_11152	-0.0246732	-0.176285		Ga0212129_11152	0.0672795	0.499362
Ga0212129_11153	-0.0696945	-0.32499		Ga0212129_11153	0.497951	2.22397		Ga0212129_11153	0.215704	0.994624			Ga0212129_11153	0.306431	1.89475		Ga0212129_11153	0.303733	1.86925		Ga0212129_11153	0.263449	1.74536			Ga0212129_11153	0.137833	0.847216		Ga0212129_11153	0.234511	1.37488		Ga0212129_11153	0.178784	1.11583			Ga0212129_11153	0.136474	0.788292		Ga0212129_11153	0.260589	1.56679		Ga0212129_11153	0.139465	0.906574
Ga0212129_11154	0.0913308	0.613376		Ga0212129_11154	0.257414	1.66902		Ga0212129_11154	0.0849233	0.57721			Ga0212129_11154	0.143388	1.06262		Ga0212129_11154	0.221036	1.61926		Ga0212129_11154	0.124504	0.900091			Ga0212129_11154	0.147616	1.0846		Ga0212129_11154	0.11671	0.884374		Ga0212129_11154	0.145196	1.09365			Ga0212129_11154	0.122795	0.871329		Ga0212129_11154	0.164011	1.2085		Ga0212129_11154	0.195595	1.47989
Ga0212129_11155	-0.184033	-1.08864		Ga0212129_11155	0.362659	2.15867		Ga0212129_11155	0.088867	0.544722			Ga0212129_11155	0.265582	1.74504		Ga0212129_11155	0.230359	1.5026		Ga0212129_11155	0.21832	1.38156			Ga0212129_11155	0.157303	1.06046		Ga0212129_11155	0.113836	0.692537		Ga0212129_11155	0.218641	1.33563			Ga0212129_11155	0.067678	0.414955		Ga0212129_11155	0.0619543	0.431466		Ga0212129_11155	0.152016	1.00536
Ga0212129_11156	-0.5811	-1.04285		Ga0212129_11156	-0.178162	-0.437762		Ga0212129_11156	-0.202797	-0.306791			Ga0212129_11156	-0.0119221	-0.025008		Ga0212129_11156	-0.153445	-0.316925		Ga0212129_11156	-0.130451	-0.248732			Ga0212129_11156	0.105266	0.219985		Ga0212129_11156	-0.346753	-0.573936		Ga0212129_11156	-0.12516	-0.259261			Ga0212129_11156	-0.343579	-0.577093		Ga0212129_11156	-0.0219377	-0.0481865		Ga0212129_11156	-0.114712	-0.242351
Ga0212129_111567	-0.36633	-1.60723		Ga0212129_111567	0.229448	0.899916		Ga0212129_111567	0.163241	0.743754			Ga0212129_111567	0.0147019	0.0776738		Ga0212129_111567	0.203721	1.03605		Ga0212129_111567	0.234007	1.1302			Ga0212129_111567	-0.0320229	-0.146712		Ga0212129_111567	0.213078	1.11028		Ga0212129_111567	0.171569	0.934571			Ga0212129_111567	-0.0216882	-0.112188		Ga0212129_111567	0.248221	1.35379		Ga0212129_111567	0.147043	0.726351
Ga0212129_111568	0.27395	1.01849		Ga0212129_111568	0.13973	0.683478		Ga0212129_111568	0.244096	0.849138			Ga0212129_111568	-0.0133081	-0.0734591		Ga0212129_111568	-0.0481094	-0.22528		Ga0212129_111568	-0.00828701	-0.0444118			Ga0212129_111568	-0.083056	-0.399121		Ga0212129_111568	-0.00862818	-0.042829		Ga0212129_111568	0.0748844	0.402479			Ga0212129_111568	-0.129094	-0.618523		Ga0212129_111568	-0.0938686	-0.457658		Ga0212129_111568	-0.0466103	-0.21311
Ga0212129_111569	-0.0871607	-0.511874		Ga0212129_111569	0.0299537	0.170196		Ga0212129_111569	0.0768658	0.487514			Ga0212129_111569	-0.1347	-0.886559		Ga0212129_111569	-0.0979124	-0.65892		Ga0212129_111569	-0.131482	-0.89007			Ga0212129_111569	-0.113313	-0.767994		Ga0212129_111569	-0.149132	-0.950036		Ga0212129_111569	-0.0578848	-0.390797			Ga0212129_111569	-0.186835	-1.24696		Ga0212129_111569	-0.0968749	-0.648767		Ga0212129_111569	-0.107638	-0.741475
Ga0212129_11157	0.0838823	0.363306		Ga0212129_11157	0.283326	1.163		Ga0212129_11157	-0.202372	-0.889999			Ga0212129_11157	0.0300602	0.184559		Ga0212129_11157	0.000664197	0.00368249		Ga0212129_11157	-0.12617	-0.668046			Ga0212129_11157	0.0215378	0.126245		Ga0212129_11157	-0.0369281	-0.187332		Ga0212129_11157	-0.0777291	-0.458667			Ga0212129_11157	-0.114636	-0.704539		Ga0212129_11157	0.0154323	0.0849353		Ga0212129_11157	-0.0877619	-0.512028
Ga0212129_111572	-0.114053	-0.466072		Ga0212129_111572	-0.0715631	-0.223027		Ga0212129_111572	0.132025	0.44929			Ga0212129_111572	-0.177557	-0.903685		Ga0212129_111572	0.0247398	0.100707		Ga0212129_111572	0.196304	0.879794			Ga0212129_111572	0.0665154	0.348691		Ga0212129_111572	0.130303	0.568692		Ga0212129_111572	0.210056	0.974984			Ga0212129_111572	0.125478	0.613888		Ga0212129_111572	0.196654	0.835892		Ga0212129_111572	0.125296	0.605249
Ga0212129_111574	-0.262036	-1.21022		Ga0212129_111574	-0.562212	-2.76937		Ga0212129_111574	-0.281058	-1.51969			Ga0212129_111574	-0.564193	-3.55062		Ga0212129_111574	-0.40453	-2.17633		Ga0212129_111574	-0.323774	-1.92064			Ga0212129_111574	-0.516715	-3.14809		Ga0212129_111574	-0.323506	-1.86639		Ga0212129_111574	-0.340303	-2.01322			Ga0212129_111574	-0.529195	-2.98424		Ga0212129_111574	-0.353743	-2.40135		Ga0212129_111574	-0.412506	-2.36067
Ga0212129_111575	0.214873	0.985658		Ga0212129_111575	-0.471916	-1.40874		Ga0212129_111575	0.0427814	0.186528			Ga0212129_111575	-0.0205463	-0.103743		Ga0212129_111575	0.289127	1.61598		Ga0212129_111575	0.0165585	0.0779057			Ga0212129_111575	-0.0939782	-0.459876		Ga0212129_111575	0.0410251	0.201727		Ga0212129_111575	-0.0210584	-0.0965056			Ga0212129_111575	0.0527504	0.247081		Ga0212129_111575	0.132515	0.581653		Ga0212129_111575	0.0267958	0.133231
Ga0212129_111577	-0.198591	-0.593149		Ga0212129_111577	-0.385805	-1.00943		Ga0212129_111577	-0.0543022	-0.203373			Ga0212129_111577	-0.556258	-2.1372		Ga0212129_111577	-0.176689	-0.614132		Ga0212129_111577	-0.321991	-1.12378			Ga0212129_111577	-0.285432	-1.09949		Ga0212129_111577	-0.404222	-1.4281		Ga0212129_111577	-0.121287	-0.425372			Ga0212129_111577	-0.25251	-0.875195		Ga0212129_111577	-0.308416	-1.10954		Ga0212129_111577	-0.226521	-0.838117
Ga0212129_111578	-1.04477	-3.2558		Ga0212129_111578	-0.26577	-1.09353		Ga0212129_111578	-0.0697321	-0.164556			Ga0212129_111578	-0.29363	-1.21887		Ga0212129_111578	-0.448771	-1.75549		Ga0212129_111578	-0.261409	-0.950894			Ga0212129_111578	-0.431752	-1.58691		Ga0212129_111578	-0.334097	-1.40588		Ga0212129_111578	-0.516388	-1.90735			Ga0212129_111578	-0.531535	-2.06223		Ga0212129_111578	-0.19672	-0.774944		Ga0212129_111578	-0.527413	-2.12439
Ga0212129_111579	-0.648874	-2.10358		Ga0212129_111579	0.229523	0.732061		Ga0212129_111579	-0.039161	-0.111675			Ga0212129_111579	-0.811904	-3.55777		Ga0212129_111579	-0.45502	-1.64479		Ga0212129_111579	-0.335716	-1.34169			Ga0212129_111579	-0.460736	-1.5798		Ga0212129_111579	-0.36223	-1.25504		Ga0212129_111579	-0.601553	-2.2809			Ga0212129_111579	-0.505369	-2.07258		Ga0212129_111579	-0.292463	-1.00004		Ga0212129_111579	-0.62306	-2.79632
Ga0212129_11158	0.169896	0.866897		Ga0212129_11158	0.417487	2.01179		Ga0212129_11158	-0.0511474	-0.265367			Ga0212129_11158	-0.0151237	-0.094388		Ga0212129_11158	0.0660986	0.401372		Ga0212129_11158	-0.0621033	-0.359162			Ga0212129_11158	-0.141635	-0.859731		Ga0212129_11158	0.0412703	0.233187		Ga0212129_11158	-0.000336703	-0.00204724			Ga0212129_11158	-0.0745295	-0.416773		Ga0212129_11158	-0.016655	-0.100397		Ga0212129_11158	-0.0763597	-0.446908
Ga0212129_111580	0.0646983	0.235397		Ga0212129_111580	0.293593	1.10062		Ga0212129_111580	0.507579	2.51594			Ga0212129_111580	0.163029	0.777049		Ga0212129_111580	0.334489	1.50366		Ga0212129_111580	0.190045	0.940181			Ga0212129_111580	-0.0211968	-0.108048		Ga0212129_111580	0.271337	1.35328		Ga0212129_111580	0.219376	1.08879			Ga0212129_111580	0.0166066	0.0723444		Ga0212129_111580	0.127108	0.624698		Ga0212129_111580	0.387423	2.10452
Ga0212129_111581	-0.24935	-1.21174		Ga0212129_111581	0.100724	0.548623		Ga0212129_111581	0.0334476	0.164327			Ga0212129_111581	0.0938669	0.635632		Ga0212129_111581	-0.0851891	-0.580904		Ga0212129_111581	-0.0468073	-0.295691			Ga0212129_111581	-0.00109768	-0.00757512		Ga0212129_111581	-0.00330151	-0.0212993		Ga0212129_111581	0.0616984	0.430115			Ga0212129_111581	-0.0987976	-0.625053		Ga0212129_111581	0.0203599	0.139561		Ga0212129_111581	0.00975047	0.0667162
Ga0212129_111582	0.41145	1.93467		Ga0212129_111582	0.486712	1.84847		Ga0212129_111582	0.0762946	0.292959			Ga0212129_111582	0.309547	1.40331		Ga0212129_111582	0.470828	2.61574		Ga0212129_111582	0.389404	1.9677			Ga0212129_111582	0.334786	1.83667		Ga0212129_111582	0.330193	1.49253		Ga0212129_111582	0.464996	2.58984			Ga0212129_111582	0.278537	1.52792		Ga0212129_111582	0.236204	1.22105		Ga0212129_111582	0.367047	1.99826
Ga0212129_111583	0.114317	0.338428		Ga0212129_111583	0.222153	0.641557		Ga0212129_111583	0.140025	0.386351			Ga0212129_111583	0.458818	1.9257		Ga0212129_111583	0.432054	1.73143		Ga0212129_111583	0.430087	1.83197			Ga0212129_111583	0.344663	1.40029		Ga0212129_111583	0.309266	1.27815		Ga0212129_111583	0.462003	1.97344			Ga0212129_111583	0.465812	1.97819		Ga0212129_111583	0.446385	1.86481		Ga0212129_111583	0.406851	1.69454
Ga0212129_111584	-0.000193165	-0.0007525		Ga0212129_111584	-0.236252	-0.822872		Ga0212129_111584	-0.0451456	-0.175338			Ga0212129_111584	-0.451492	-2.54041		Ga0212129_111584	-0.470341	-2.56474		Ga0212129_111584	-0.208499	-1.04598			Ga0212129_111584	-0.249948	-1.2832		Ga0212129_111584	-0.294738	-1.47342		Ga0212129_111584	-0.285975	-1.57913			Ga0212129_111584	-0.347681	-1.68652		Ga0212129_111584	-0.340455	-1.88967		Ga0212129_111584	-0.213151	-1.16957
Ga0212129_111585	-0.0692183	-0.392431		Ga0212129_111585	-0.195518	-0.755778		Ga0212129_111585	-0.214401	-0.977675			Ga0212129_111585	-0.1795	-1.04759		Ga0212129_111585	-0.0858657	-0.507525		Ga0212129_111585	-0.107566	-0.598616			Ga0212129_111585	-0.115008	-0.699999		Ga0212129_111585	-0.117306	-0.715614		Ga0212129_111585	-0.180195	-0.971558			Ga0212129_111585	-0.123153	-0.691422		Ga0212129_111585	-0.0820044	-0.464618		Ga0212129_111585	-0.108649	-0.583176
Ga0212129_111586	-0.194003	-0.932012		Ga0212129_111586	0.0989391	0.376282		Ga0212129_111586	0.225786	0.851568			Ga0212129_111586	0.113306	0.622341		Ga0212129_111586	0.213718	1.20105		Ga0212129_111586	0.412854	2.0633			Ga0212129_111586	0.299687	1.61195		Ga0212129_111586	0.444609	2.51909		Ga0212129_111586	0.239466	1.29081			Ga0212129_111586	0.319655	1.51577		Ga0212129_111586	0.365279	1.87473		Ga0212129_111586	0.302379	1.59072
Ga0212129_111587	-0.00861797	-0.0396459		Ga0212129_111587	0.306256	1.35109		Ga0212129_111587	0.0971398	0.393499			Ga0212129_111587	-0.358653	-1.77077		Ga0212129_111587	0.038196	0.195894		Ga0212129_111587	0.0695885	0.324295			Ga0212129_111587	-0.0602899	-0.298509		Ga0212129_111587	-0.0502892	-0.253987		Ga0212129_111587	-0.0105043	-0.0517062			Ga0212129_111587	-0.0639306	-0.314921		Ga0212129_111587	-0.0934405	-0.405905		Ga0212129_111587	-0.0963706	-0.476387
Ga0212129_111588	0.107776	0.430953		Ga0212129_111588	0.0406846	0.160066		Ga0212129_111588	0.39897	1.68967			Ga0212129_111588	-0.0305363	-0.135213		Ga0212129_111588	0.160603	0.701903		Ga0212129_111588	0.0734992	0.313476			Ga0212129_111588	0.0399253	0.182094		Ga0212129_111588	-0.0586997	-0.251439		Ga0212129_111588	0.106097	0.456471			Ga0212129_111588	-0.0391455	-0.161709		Ga0212129_111588	0.11543	0.562689		Ga0212129_111588	-0.0338046	-0.154555
Ga0212129_111589	-0.0251028	-0.151681		Ga0212129_111589	0.0552129	0.274871		Ga0212129_111589	0.0952994	0.530042			Ga0212129_111589	0.0279757	0.195007		Ga0212129_111589	0.0830811	0.57351		Ga0212129_111589	0.178704	1.23833			Ga0212129_111589	0.11208	0.789304		Ga0212129_111589	0.12593	0.855702		Ga0212129_111589	0.155782	1.0275			Ga0212129_111589	-0.00196571	-0.0134855		Ga0212129_111589	0.094954	0.632672		Ga0212129_111589	0.0347621	0.242202
Ga0212129_11159	-0.0461464	-0.193465		Ga0212129_11159	-0.0409421	-0.131527		Ga0212129_11159	-0.0203179	-0.101336			Ga0212129_11159	-0.0927376	-0.45879		Ga0212129_11159	-0.231705	-1.34967		Ga0212129_11159	-0.248719	-1.36149			Ga0212129_11159	-0.347421	-1.99865		Ga0212129_11159	-0.181843	-0.908053		Ga0212129_11159	-0.188567	-1.03252			Ga0212129_11159	-0.2841	-1.73874		Ga0212129_11159	-0.433608	-2.4046		Ga0212129_11159	-0.220245	-1.09318
Ga0212129_111591	-0.217068	-0.917349		Ga0212129_111591	-0.352368	-1.44482		Ga0212129_111591	-0.326983	-1.43101			Ga0212129_111591	-0.182971	-1.04398		Ga0212129_111591	-0.324191	-1.74085		Ga0212129_111591	-0.249859	-1.53706			Ga0212129_111591	-0.380676	-2.18284		Ga0212129_111591	-0.302724	-1.49887		Ga0212129_111591	-0.320095	-1.71825			Ga0212129_111591	-0.305272	-1.7387		Ga0212129_111591	-0.272218	-1.45683		Ga0212129_111591	-0.240032	-1.37834
Ga0212129_111592	0.12671	0.403251		Ga0212129_111592	-0.225735	-0.717454		Ga0212129_111592	-0.242355	-0.833726			Ga0212129_111592	-0.535214	-2.34927		Ga0212129_111592	-0.398885	-1.50299		Ga0212129_111592	-0.28693	-1.17348			Ga0212129_111592	-0.300085	-1.15083		Ga0212129_111592	-0.391951	-1.52265		Ga0212129_111592	-0.418511	-2.06747			Ga0212129_111592	-0.410193	-1.69329		Ga0212129_111592	-0.293661	-1.05481		Ga0212129_111592	-0.327135	-1.33734
Ga0212129_111596	-0.0475096	-0.312793		Ga0212129_111596	-0.0651697	-0.39222		Ga0212129_111596	0.183166	1.1263			Ga0212129_111596	0.0481954	0.357308		Ga0212129_111596	0.147	1.08066		Ga0212129_111596	0.130583	0.936349			Ga0212129_111596	0.140912	1.02874		Ga0212129_111596	0.167906	1.19556		Ga0212129_111596	0.196866	1.45014			Ga0212129_111596	0.0726434	0.530793		Ga0212129_111596	0.0842936	0.612541		Ga0212129_111596	0.0518937	0.37913
Ga0212129_111597	0.233612	0.687682		Ga0212129_111597	-0.204213	-0.557877		Ga0212129_111597	-0.216693	-0.501303			Ga0212129_111597	0.299349	0.824516		Ga0212129_111597	0.15792	0.402731		Ga0212129_111597	0.109884	0.269975			Ga0212129_111597	-0.176659	-0.506765		Ga0212129_111597	0.209779	0.47078		Ga0212129_111597	0.0194201	0.0524463			Ga0212129_111597	0.132977	0.332977		Ga0212129_111597	0.267794	0.879065		Ga0212129_111597	0.341161	1.04552
Ga0212129_111599	-0.088883	-0.413755		Ga0212129_111599	0.428244	1.39607		Ga0212129_111599	0.16706	0.676016			Ga0212129_111599	0.398682	2.19447		Ga0212129_111599	0.0705317	0.398134		Ga0212129_111599	0.0359733	0.17999			Ga0212129_111599	0.21766	1.12157		Ga0212129_111599	0.185263	1.02683		Ga0212129_111599	0.187055	0.925409			Ga0212129_111599	0.142479	0.712723		Ga0212129_111599	0.228399	1.10177		Ga0212129_111599	0.215782	1.18089
Ga0212129_111600	0.412686	1.32524		Ga0212129_111600	0.459569	1.0329		Ga0212129_111600	0.535776	1.57317			Ga0212129_111600	0.224937	0.829198		Ga0212129_111600	0.140041	0.490896		Ga0212129_111600	0.22629	0.840108			Ga0212129_111600	0.322164	1.3627		Ga0212129_111600	0.16268	0.511214		Ga0212129_111600	0.164083	0.624401			Ga0212129_111600	-0.237209	-0.737142		Ga0212129_111600	-0.0949423	-0.383813		Ga0212129_111600	0.157562	0.649255
Ga0212129_111601	-0.437248	-1.86526		Ga0212129_111601	-0.0682566	-0.236123		Ga0212129_111601	0.240315	1.03087			Ga0212129_111601	-0.104869	-0.466095		Ga0212129_111601	-0.0186524	-0.103285		Ga0212129_111601	0.0911908	0.432836			Ga0212129_111601	-0.0871037	-0.450902		Ga0212129_111601	-0.0793625	-0.438027		Ga0212129_111601	-0.04016	-0.235559			Ga0212129_111601	-0.0540402	-0.277306		Ga0212129_111601	-0.00010844	-0.000557276		Ga0212129_111601	0.0758931	0.416034
Ga0212129_111602	-0.240056	-0.924408		Ga0212129_111602	0.0440107	0.173191		Ga0212129_111602	0.48438	2.27136			Ga0212129_111602	-0.137431	-0.690455		Ga0212129_111602	-0.133717	-0.60278		Ga0212129_111602	-0.109564	-0.538539			Ga0212129_111602	-0.316891	-1.74236		Ga0212129_111602	-0.145278	-0.714906		Ga0212129_111602	-0.101001	-0.454506			Ga0212129_111602	-0.0508276	-0.244858		Ga0212129_111602	-0.0862952	-0.393263		Ga0212129_111602	-0.183117	-0.887979
Ga0212129_111603	0.122553	0.49042		Ga0212129_111603	-0.0646076	-0.197779		Ga0212129_111603	0.452051	1.2803			Ga0212129_111603	0.235994	0.897689		Ga0212129_111603	0.219452	0.886463		Ga0212129_111603	0.238844	0.931707			Ga0212129_111603	0.0426239	0.183287		Ga0212129_111603	0.0269335	0.097239		Ga0212129_111603	0.185068	0.844745			Ga0212129_111603	0.0859671	0.363881		Ga0212129_111603	0.0751801	0.311852		Ga0212129_111603	0.182401	0.715351
Ga0212129_111604	0.00284262	0.0158731		Ga0212129_111604	0.391415	1.5448		Ga0212129_111604	0.284308	1.42199			Ga0212129_111604	0.319886	1.94852		Ga0212129_111604	0.32855	1.88143		Ga0212129_111604	0.283834	1.57249			Ga0212129_111604	0.326218	2.08042		Ga0212129_111604	0.332411	1.91397		Ga0212129_111604	0.324548	2.10141			Ga0212129_111604	0.301157	1.68381		Ga0212129_111604	0.174811	1.02899		Ga0212129_111604	0.282943	1.79704
Ga0212129_111605	0.0607402	0.242068		Ga0212129_111605	-0.274147	-0.717462		Ga0212129_111605	-0.654016	-2.44019			Ga0212129_111605	-0.168939	-0.830056		Ga0212129_111605	-0.0483876	-0.223296		Ga0212129_111605	-0.0660664	-0.319644			Ga0212129_111605	-0.01181	-0.0501046		Ga0212129_111605	-0.0481888	-0.194142		Ga0212129_111605	-0.00279291	-0.0117114			Ga0212129_111605	-0.194014	-0.859479		Ga0212129_111605	-0.107817	-0.53598		Ga0212129_111605	-0.220767	-1.02975
Ga0212129_111606	-0.244788	-1.02676		Ga0212129_111606	0.00697209	0.0241248		Ga0212129_111606	0.242504	1.01882			Ga0212129_111606	0.0419616	0.218643		Ga0212129_111606	-0.0379015	-0.199766		Ga0212129_111606	0.0715841	0.380288			Ga0212129_111606	0.0680312	0.359075		Ga0212129_111606	0.0793198	0.412554		Ga0212129_111606	0.11877	0.633597			Ga0212129_111606	0.0139086	0.0734516		Ga0212129_111606	0.175091	0.918718		Ga0212129_111606	-0.0558273	-0.288455
Ga0212129_111607	-0.293026	-1.0406		Ga0212129_111607	0.251988	0.686542		Ga0212129_111607	-0.044306	-0.112182			Ga0212129_111607	-0.182696	-0.667606		Ga0212129_111607	-0.153539	-0.682524		Ga0212129_111607	-0.0457889	-0.165317			Ga0212129_111607	0.0161233	0.0710713		Ga0212129_111607	-0.143549	-0.614704		Ga0212129_111607	-0.103044	-0.411754			Ga0212129_111607	-0.230444	-1.03734		Ga0212129_111607	-0.153633	-0.578286		Ga0212129_111607	-0.0379687	-0.146351
Ga0212129_11161	0.261461	1.3522		Ga0212129_11161	0.3809	1.93265		Ga0212129_11161	0.188066	0.913525			Ga0212129_11161	0.137926	0.723142		Ga0212129_11161	0.288424	1.5372		Ga0212129_11161	0.331741	1.82832			Ga0212129_11161	0.172402	0.986237		Ga0212129_11161	0.316921	1.75077		Ga0212129_11161	0.224007	1.26416			Ga0212129_11161	0.274385	1.38901		Ga0212129_11161	0.212644	1.23605		Ga0212129_11161	0.191943	1.07407
Ga0212129_111611	-0.000558312	-0.00251376		Ga0212129_111611	0.0076642	0.0412824		Ga0212129_111611	-0.252537	-1.00592			Ga0212129_111611	-0.17215	-0.859944		Ga0212129_111611	0.020644	0.0952365		Ga0212129_111611	-0.130489	-0.580206			Ga0212129_111611	-0.0497068	-0.252006		Ga0212129_111611	-0.0839587	-0.403358		Ga0212129_111611	-0.131677	-0.654515			Ga0212129_111611	-0.200347	-1.04977		Ga0212129_111611	-0.164276	-0.831862		Ga0212129_111611	-0.0218288	-0.106866
Ga0212129_111616	0.0325094	0.0896117		Ga0212129_111616	0.572596	1.95065		Ga0212129_111616	0.259703	0.810401			Ga0212129_111616	0.287133	1.19341		Ga0212129_111616	0.168141	0.68496		Ga0212129_111616	0.279996	1.34599			Ga0212129_111616	0.225614	1.02588		Ga0212129_111616	0.0234594	0.0988565		Ga0212129_111616	0.133536	0.610692			Ga0212129_111616	0.237928	0.968848		Ga0212129_111616	0.0892946	0.330289		Ga0212129_111616	0.00921205	0.0372513
Ga0212129_111617	-0.159136	-0.774302		Ga0212129_111617	-0.265664	-1.22285		Ga0212129_111617	-0.154673	-0.627836			Ga0212129_111617	-5.642e-05	-0.000295259		Ga0212129_111617	0.0205794	0.0992242		Ga0212129_111617	0.127606	0.709608			Ga0212129_111617	0.118677	0.656535		Ga0212129_111617	0.0531834	0.27937		Ga0212129_111617	0.0624869	0.338142			Ga0212129_111617	0.0439232	0.242215		Ga0212129_111617	0.0765136	0.404676		Ga0212129_111617	0.0211219	0.118859
Ga0212129_111618	-0.110548	-0.567147		Ga0212129_111618	0.0228824	0.110643		Ga0212129_111618	-0.0285447	-0.158393			Ga0212129_111618	-0.0403154	-0.266262		Ga0212129_111618	0.0241795	0.157903		Ga0212129_111618	-0.0953372	-0.649555			Ga0212129_111618	-0.0206492	-0.12893		Ga0212129_111618	-0.0966631	-0.592445		Ga0212129_111618	0.0149294	0.0911477			Ga0212129_111618	-0.0708503	-0.454239		Ga0212129_111618	0.114892	0.774355		Ga0212129_111618	-0.0661873	-0.445784
Ga0212129_11162	0.141858	1.07563		Ga0212129_11162	0.325901	2.11863		Ga0212129_11162	0.257674	1.80298			Ga0212129_11162	0.280028	2.22678		Ga0212129_11162	0.384685	2.89464		Ga0212129_11162	0.283668	2.15445			Ga0212129_11162	0.277377	2.12229		Ga0212129_11162	0.312276	2.39536		Ga0212129_11162	0.245636	1.8655			Ga0212129_11162	0.219629	1.59964		Ga0212129_11162	0.288888	2.12177		Ga0212129_11162	0.318814	2.4747
Ga0212129_111623	-0.097085	-0.549085		Ga0212129_111623	0.361161	1.93165		Ga0212129_111623	0.379313	1.95822			Ga0212129_111623	0.131874	0.856666		Ga0212129_111623	0.175293	1.07838		Ga0212129_111623	0.12196	0.701246			Ga0212129_111623	0.0748592	0.434733		Ga0212129_111623	0.0936362	0.552992		Ga0212129_111623	0.15199	0.952816			Ga0212129_111623	0.0592891	0.347456		Ga0212129_111623	0.109663	0.671984		Ga0212129_111623	0.181418	1.07203
Ga0212129_111624	0.189011	0.496505		Ga0212129_111624	0.10266	0.331426		Ga0212129_111624	-0.288688	-0.762408			Ga0212129_111624	0.198422	0.709554		Ga0212129_111624	0.199258	0.822833		Ga0212129_111624	0.00905382	0.0301766			Ga0212129_111624	0.0584072	0.197136		Ga0212129_111624	0.128098	0.498942		Ga0212129_111624	0.145931	0.518214			Ga0212129_111624	-0.0162751	-0.0583914		Ga0212129_111624	0.0649381	0.273249		Ga0212129_111624	0.221769	0.91916
Ga0212129_111626	-0.0659561	-0.374957		Ga0212129_111626	0.215398	0.950916		Ga0212129_111626	0.0923028	0.503205			Ga0212129_111626	0.0777233	0.485462		Ga0212129_111626	0.113579	0.626619		Ga0212129_111626	0.0799651	0.494889			Ga0212129_111626	0.0766392	0.440317		Ga0212129_111626	0.0985934	0.563823		Ga0212129_111626	0.0561277	0.327117			Ga0212129_111626	0.0753954	0.492702		Ga0212129_111626	0.0553123	0.331474		Ga0212129_111626	0.0317776	0.193632
Ga0212129_111627	-0.342504	-1.00245		Ga0212129_111627	-0.188877	-0.299973		Ga0212129_111627	0.0476295	0.118332			Ga0212129_111627	-0.182225	-0.520395		Ga0212129_111627	-0.120709	-0.34397		Ga0212129_111627	-0.295491	-1.01501			Ga0212129_111627	0.0340729	0.120265		Ga0212129_111627	-0.27591	-0.953189		Ga0212129_111627	-0.389912	-1.51082			Ga0212129_111627	-0.186944	-0.688421		Ga0212129_111627	-0.257592	-0.817003		Ga0212129_111627	-0.377347	-1.41776
Ga0212129_111628	0.298905	0.823866		Ga0212129_111628	-0.0904478	-0.289912		Ga0212129_111628	0.163773	0.452456			Ga0212129_111628	-0.0430748	-0.178309		Ga0212129_111628	0.120118	0.524289		Ga0212129_111628	-0.0113439	-0.0363306			Ga0212129_111628	-0.00970912	-0.0321313		Ga0212129_111628	-0.0949498	-0.33781		Ga0212129_111628	0.0250864	0.100253			Ga0212129_111628	-0.0747117	-0.243959		Ga0212129_111628	-0.101808	-0.38608		Ga0212129_111628	-0.255539	-0.894892
Ga0212129_111629	-0.0077249	-0.0476974		Ga0212129_111629	0.00764063	0.0417531		Ga0212129_111629	0.181556	0.793394			Ga0212129_111629	0.0668874	0.452646		Ga0212129_111629	0.133621	0.910392		Ga0212129_111629	0.0312648	0.210346			Ga0212129_111629	0.0385121	0.260857		Ga0212129_111629	0.113314	0.720042		Ga0212129_111629	-0.0122524	-0.0796963			Ga0212129_111629	0.0209624	0.143465		Ga0212129_111629	0.117989	0.748213		Ga0212129_111629	0.00485435	0.0319096
Ga0212129_11163	0.0399117	0.155157		Ga0212129_11163	-0.41512	-1.47143		Ga0212129_11163	0.135997	0.478473			Ga0212129_11163	0.0306601	0.12611		Ga0212129_11163	0.210868	1.05369		Ga0212129_11163	-0.0210367	-0.0847751			Ga0212129_11163	-0.0828033	-0.351583		Ga0212129_11163	0.119494	0.60178		Ga0212129_11163	0.0796128	0.416001			Ga0212129_11163	0.278973	1.22209		Ga0212129_11163	0.123894	0.543695		Ga0212129_11163	0.0377387	0.158221
Ga0212129_111630	0.276881	1.27089		Ga0212129_111630	0.00283588	0.0105002		Ga0212129_111630	0.165359	0.723839			Ga0212129_111630	0.0144992	0.0796909		Ga0212129_111630	0.035262	0.190966		Ga0212129_111630	-0.0378788	-0.182251			Ga0212129_111630	-0.0389928	-0.19911		Ga0212129_111630	0.0184719	0.102527		Ga0212129_111630	-0.111302	-0.547961			Ga0212129_111630	0.0705873	0.358892		Ga0212129_111630	0.1467	0.749061		Ga0212129_111630	0.021696	0.115997
Ga0212129_111632	0.321889	1.39384		Ga0212129_111632	0.33545	1.30277		Ga0212129_111632	0.272051	1.32618			Ga0212129_111632	-0.0168821	-0.101507		Ga0212129_111632	0.218769	1.14327		Ga0212129_111632	0.210696	1.18395			Ga0212129_111632	0.108164	0.568016		Ga0212129_111632	0.223157	1.06882		Ga0212129_111632	0.0102395	0.0502886			Ga0212129_111632	-0.00893364	-0.0473785		Ga0212129_111632	0.210877	1.09133		Ga0212129_111632	0.171797	1.0141
Ga0212129_111633	0.0551568	0.312959		Ga0212129_111633	0.114042	0.587368		Ga0212129_111633	-0.0972313	-0.486045			Ga0212129_111633	-0.0241373	-0.167069		Ga0212129_111633	0.0567466	0.389305		Ga0212129_111633	0.0962819	0.650557			Ga0212129_111633	0.0344198	0.220251		Ga0212129_111633	-0.0160897	-0.104083		Ga0212129_111633	0.0417725	0.261192			Ga0212129_111633	0.061448	0.401006		Ga0212129_111633	0.104705	0.714129		Ga0212129_111633	0.122857	0.860138
Ga0212129_111636	0.506982	1.07758		Ga0212129_111636	0.361433	0.824775		Ga0212129_111636	0.77573	2.14752			Ga0212129_111636	0.538537	1.12636		Ga0212129_111636	0.355936	0.715125		Ga0212129_111636	0.335618	0.762918			Ga0212129_111636	0.0738701	0.156162		Ga0212129_111636	0.313058	0.673599		Ga0212129_111636	0.472718	1.01193			Ga0212129_111636	0.123786	0.254289		Ga0212129_111636	0.351115	0.787706		Ga0212129_111636	0.395202	0.893551
Ga0212129_111637	0.252051	1.04056		Ga0212129_111637	-0.199953	-0.561391		Ga0212129_111637	0.17309	0.481349			Ga0212129_111637	0.0907502	0.373093		Ga0212129_111637	0.013327	0.0700731		Ga0212129_111637	-0.0643167	-0.315813			Ga0212129_111637	0.195389	0.887784		Ga0212129_111637	0.195507	0.922157		Ga0212129_111637	0.073342	0.322949			Ga0212129_111637	0.0407519	0.214327		Ga0212129_111637	-0.0634618	-0.275891		Ga0212129_111637	-0.0262161	-0.118136
Ga0212129_111638	-0.321586	-1.92039		Ga0212129_111638	0.0202554	0.112581		Ga0212129_111638	0.0185643	0.113203			Ga0212129_111638	-0.137632	-1.01189		Ga0212129_111638	-0.15369	-1.06924		Ga0212129_111638	-0.199975	-1.42543			Ga0212129_111638	-0.187142	-1.23623		Ga0212129_111638	-0.150325	-1.03179		Ga0212129_111638	-0.254335	-1.77212			Ga0212129_111638	-0.258166	-1.58623		Ga0212129_111638	-0.204581	-1.46661		Ga0212129_111638	-0.1848	-1.27205
Ga0212129_11164	-0.199681	-0.698199		Ga0212129_11164	0.468997	1.33453		Ga0212129_11164	0.271718	0.977866			Ga0212129_11164	0.380406	1.58656		Ga0212129_11164	0.424627	1.36297		Ga0212129_11164	0.353921	1.23447			Ga0212129_11164	0.201379	0.773458		Ga0212129_11164	0.255869	1.04685		Ga0212129_11164	0.336283	1.35496			Ga0212129_11164	0.234246	0.986659		Ga0212129_11164	0.21899	0.763444		Ga0212129_11164	0.0429744	0.165721
Ga0212129_111640	-0.268829	-0.776722		Ga0212129_111640	0.286996	1.1236		Ga0212129_111640	-0.0171256	-0.051742			Ga0212129_111640	-0.103622	-0.43037		Ga0212129_111640	0.140026	0.446367		Ga0212129_111640	0.238275	0.739362			Ga0212129_111640	0.357334	1.24708		Ga0212129_111640	0.02851	0.103195		Ga0212129_111640	0.157402	0.475859			Ga0212129_111640	0.159899	0.554069		Ga0212129_111640	-0.0111776	-0.0390528		Ga0212129_111640	0.0347246	0.121
Ga0212129_111641	-0.204219	-0.604214		Ga0212129_111641	-0.599053	-1.46147		Ga0212129_111641	-0.1804	-0.54029			Ga0212129_111641	-0.369775	-1.31474		Ga0212129_111641	-0.410674	-1.56948		Ga0212129_111641	-0.298276	-1.31061			Ga0212129_111641	-0.389449	-1.52509		Ga0212129_111641	-0.410634	-1.67406		Ga0212129_111641	-0.326403	-1.24931			Ga0212129_111641	-0.34691	-1.56344		Ga0212129_111641	-0.282755	-1.00049		Ga0212129_111641	-0.266929	-0.91324
Ga0212129_111642	0.110243	0.661443		Ga0212129_111642	0.0980563	0.513306		Ga0212129_111642	0.0992801	0.560437			Ga0212129_111642	0.1145	0.726493		Ga0212129_111642	0.113863	0.734004		Ga0212129_111642	0.0485809	0.306966			Ga0212129_111642	0.155676	1.03302		Ga0212129_111642	0.126245	0.825135		Ga0212129_111642	0.0528334	0.327723			Ga0212129_111642	0.0961461	0.639932		Ga0212129_111642	0.0857535	0.553948		Ga0212129_111642	-0.0117781	-0.079177
Ga0212129_111643	-0.331545	-1.59284		Ga0212129_111643	0.137461	0.696756		Ga0212129_111643	-0.127769	-0.72647			Ga0212129_111643	-0.106909	-0.722263		Ga0212129_111643	-0.143817	-0.898695		Ga0212129_111643	-0.072527	-0.413174			Ga0212129_111643	-0.0243131	-0.148265		Ga0212129_111643	-0.187068	-1.13388		Ga0212129_111643	-0.242645	-1.40386			Ga0212129_111643	-0.112168	-0.727326		Ga0212129_111643	-0.142538	-0.825915		Ga0212129_111643	-0.148242	-0.931644
Ga0212129_11165	-0.02119	-0.0954608		Ga0212129_11165	-0.0852132	-0.317822		Ga0212129_11165	0.180255	0.858864			Ga0212129_11165	-0.0361903	-0.189018		Ga0212129_11165	0.0521308	0.251249		Ga0212129_11165	-0.0330698	-0.160283			Ga0212129_11165	-0.00135787	-0.00687772		Ga0212129_11165	-0.0219819	-0.114118		Ga0212129_11165	-0.0559308	-0.302712			Ga0212129_11165	0.130121	0.610776		Ga0212129_11165	-0.00344797	-0.016131		Ga0212129_11165	-0.111595	-0.561634
Ga0212129_111650	0.4293	0.92977		Ga0212129_111650	0.109756	0.259546		Ga0212129_111650	0.189071	0.491554			Ga0212129_111650	0.31456	0.964927		Ga0212129_111650	0.343758	1.216		Ga0212129_111650	0.348292	1.27278			Ga0212129_111650	0.144319	0.478778		Ga0212129_111650	0.169033	0.52984		Ga0212129_111650	0.139473	0.50295			Ga0212129_111650	0.407691	1.22706		Ga0212129_111650	0.105087	0.34723		Ga0212129_111650	0.37286	1.33675
Ga0212129_111651	0.201993	0.859898		Ga0212129_111651	-0.0447999	-0.162119		Ga0212129_111651	-0.211647	-0.701874			Ga0212129_111651	-0.0366236	-0.155371		Ga0212129_111651	-0.120541	-0.481197		Ga0212129_111651	-0.248881	-0.923741			Ga0212129_111651	-0.0222163	-0.0837018		Ga0212129_111651	-0.118974	-0.473304		Ga0212129_111651	-0.0695716	-0.300556			Ga0212129_111651	-0.124396	-0.479963		Ga0212129_111651	-0.29204	-1.26902		Ga0212129_111651	-0.313542	-1.31633
Ga0212129_111652	-3.50427	-2.39892		Ga0212129_111652	-3.61875	-2.47729		Ga0212129_111652	-3.42999	-2.34807			Ga0212129_111652	-4.2711	-4.94417		Ga0212129_111652	-4.22362	-5.58053		Ga0212129_111652	-4.5676	-4.36864			Ga0212129_111652	-4.32517	-5.00675		Ga0212129_111652	-4.54455	-3.11107		Ga0212129_111652	-4.52157	-4.32462			Ga0212129_111652	-4.09732	-5.98451		Ga0212129_111652	-4.0082	-5.29592		Ga0212129_111652	-4.50739	-3.08563
Ga0212129_111657	0.0639995	0.288725		Ga0212129_111657	-0.00214134	-0.0129604		Ga0212129_111657	0.0952646	0.497105			Ga0212129_111657	-0.096906	-0.567124		Ga0212129_111657	-0.0820174	-0.474191		Ga0212129_111657	-0.095181	-0.525699			Ga0212129_111657	-0.100994	-0.609454		Ga0212129_111657	-0.106654	-0.570261		Ga0212129_111657	-0.211931	-1.17623			Ga0212129_111657	-0.0138242	-0.073782		Ga0212129_111657	-0.0707868	-0.447631		Ga0212129_111657	0.073594	0.42935
Ga0212129_11166	0.0666013	0.184235		Ga0212129_11166	-1.72768	-1.32942		Ga0212129_11166	-1.15186	-1.40228			Ga0212129_11166	-0.109717	-0.320174		Ga0212129_11166	-0.0547009	-0.154793		Ga0212129_11166	-0.647894	-2.0434			Ga0212129_11166	-0.343852	-0.764907		Ga0212129_11166	-0.685407	-1.79882		Ga0212129_11166	-0.170285	-0.519117			Ga0212129_11166	-0.426123	-1.1591		Ga0212129_11166	-0.435018	-1.28394		Ga0212129_11166	-0.560368	-1.68046
Ga0212129_111664	0.408382	1.01407		Ga0212129_111664	1.39694	4.3346		Ga0212129_111664	0.0732184	0.148151			Ga0212129_111664	-0.0165323	-0.0519675		Ga0212129_111664	0.468468	1.64972		Ga0212129_111664	0.301673	1.1418			Ga0212129_111664	0.504674	2.08471		Ga0212129_111664	0.344078	0.99955		Ga0212129_111664	0.424822	1.34547			Ga0212129_111664	0.460837	1.83692		Ga0212129_111664	0.546097	2.09665		Ga0212129_111664	0.261602	0.929498
Ga0212129_111669	-0.252835	-1.41596		Ga0212129_111669	0.0505616	0.228845		Ga0212129_111669	-0.0595194	-0.286476			Ga0212129_111669	0.0269838	0.157212		Ga0212129_111669	-0.0704203	-0.380906		Ga0212129_111669	-0.144296	-0.766558			Ga0212129_111669	-0.158658	-0.929907		Ga0212129_111669	-0.0643099	-0.382364		Ga0212129_111669	-0.213719	-1.23518			Ga0212129_111669	0.0219835	0.12229		Ga0212129_111669	-0.0488852	-0.275116		Ga0212129_111669	-0.0264453	-0.15317
Ga0212129_11167	-0.00918583	-0.0444955		Ga0212129_11167	0.260882	0.951914		Ga0212129_11167	0.256282	1.17373			Ga0212129_11167	0.123406	0.659412		Ga0212129_11167	0.0261463	0.135122		Ga0212129_11167	0.154617	0.757826			Ga0212129_11167	0.105624	0.558864		Ga0212129_11167	-0.00586553	-0.0320863		Ga0212129_11167	0.146409	0.777836			Ga0212129_11167	0.0945601	0.51005		Ga0212129_11167	0.00528306	0.027221		Ga0212129_11167	0.0119387	0.0637637
Ga0212129_111670	-0.0251442	-0.0293316		Ga0212129_111670	-0.257274	-0.434135		Ga0212129_111670	-0.0886281	-0.211107			Ga0212129_111670	-0.0751804	-0.150085		Ga0212129_111670	0.0739469	0.171954		Ga0212129_111670	-0.0419203	-0.0913844			Ga0212129_111670	0.406843	1.15943		Ga0212129_111670	0.0897908	0.203786		Ga0212129_111670	-0.139379	-0.439598			Ga0212129_111670	0.448416	0.943382		Ga0212129_111670	0.241687	0.485129		Ga0212129_111670	0.252024	0.765536
Ga0212129_111671	-0.1632	-0.929376		Ga0212129_111671	-0.0309697	-0.180717		Ga0212129_111671	-0.134689	-0.769777			Ga0212129_111671	-0.0964429	-0.736856		Ga0212129_111671	-0.0384591	-0.268975		Ga0212129_111671	-0.0152111	-0.105168			Ga0212129_111671	-0.00436608	-0.0313169		Ga0212129_111671	-0.0262214	-0.178419		Ga0212129_111671	-0.110153	-0.799496			Ga0212129_111671	0.0606858	0.421369		Ga0212129_111671	-0.0348301	-0.241826		Ga0212129_111671	-0.0377608	-0.288743
Ga0212129_111672	0.0210432	0.0950056		Ga0212129_111672	0.119986	0.410816		Ga0212129_111672	0.438288	1.93437			Ga0212129_111672	0.114767	0.628699		Ga0212129_111672	0.0667042	0.351136		Ga0212129_111672	0.239475	1.29312			Ga0212129_111672	0.160976	0.953629		Ga0212129_111672	0.08997	0.476725		Ga0212129_111672	0.206852	1.15903			Ga0212129_111672	0.0938311	0.507512		Ga0212129_111672	0.162516	0.871096		Ga0212129_111672	0.177679	0.989977
Ga0212129_111673	-0.126428	-0.452575		Ga0212129_111673	-0.498523	-1.61683		Ga0212129_111673	-0.273955	-1.03435			Ga0212129_111673	-0.211803	-0.908084		Ga0212129_111673	-0.327572	-1.37325		Ga0212129_111673	-0.421314	-1.71258			Ga0212129_111673	-0.30656	-1.54492		Ga0212129_111673	-0.505174	-2.22036		Ga0212129_111673	-0.408952	-1.72864			Ga0212129_111673	-0.392746	-1.68606		Ga0212129_111673	-0.354815	-1.57894		Ga0212129_111673	-0.428663	-1.77125
Ga0212129_111674	-0.0638463	-0.370345		Ga0212129_111674	0.111906	0.571691		Ga0212129_111674	-0.405689	-2.16001			Ga0212129_111674	-0.0119221	-0.0844451		Ga0212129_111674	0.0443971	0.308714		Ga0212129_111674	0.0181889	0.123753			Ga0212129_111674	0.0206279	0.133945		Ga0212129_111674	0.0561625	0.361301		Ga0212129_111674	-0.0242709	-0.157492			Ga0212129_111674	0.0954364	0.677891		Ga0212129_111674	-0.0840594	-0.545133		Ga0212129_111674	-0.143074	-0.993067
Ga0212129_111675	0.091343	0.633599		Ga0212129_111675	0.12533	0.900592		Ga0212129_111675	0.0704778	0.529717			Ga0212129_111675	0.0745447	0.613983		Ga0212129_111675	0.00903635	0.0700777		Ga0212129_111675	0.0365547	0.290219			Ga0212129_111675	0.0990338	0.777017		Ga0212129_111675	-0.0213286	-0.167757		Ga0212129_111675	0.0015973	0.0128991			Ga0212129_111675	-0.0417761	-0.328157		Ga0212129_111675	-0.0384981	-0.300426		Ga0212129_111675	-0.048623	-0.387558
Ga0212129_111676	-0.38234	-0.94864		Ga0212129_111676	-0.702322	-1.94056		Ga0212129_111676	-0.922337	-1.89863			Ga0212129_111676	-0.108729	-0.359223		Ga0212129_111676	-0.614986	-1.53816		Ga0212129_111676	-0.80345	-2.48643			Ga0212129_111676	-0.350442	-0.855778		Ga0212129_111676	-0.352805	-1.18745		Ga0212129_111676	-0.798376	-1.84316			Ga0212129_111676	-0.486379	-1.20579		Ga0212129_111676	-0.733228	-1.8641		Ga0212129_111676	-0.715398	-1.71473
Ga0212129_111678	0.217403	0.724431		Ga0212129_111678	-0.0975238	-0.361092		Ga0212129_111678	0.357159	1.5318			Ga0212129_111678	0.0444626	0.211353		Ga0212129_111678	0.225422	1.00328		Ga0212129_111678	0.0572918	0.284656			Ga0212129_111678	0.134376	0.593655		Ga0212129_111678	0.155044	0.728622		Ga0212129_111678	-0.106427	-0.489946			Ga0212129_111678	0.204561	0.950804		Ga0212129_111678	0.173916	0.843378		Ga0212129_111678	0.0699476	0.373568
Ga0212129_111679	0.448299	2.58336		Ga0212129_111679	0.52282	2.83543		Ga0212129_111679	0.227616	1.23391			Ga0212129_111679	0.169249	1.1729		Ga0212129_111679	0.0931454	0.58379		Ga0212129_111679	-0.0321501	-0.200154			Ga0212129_111679	0.237642	1.55195		Ga0212129_111679	0.190979	1.24778		Ga0212129_111679	0.172735	1.1334			Ga0212129_111679	0.253656	1.57911		Ga0212129_111679	0.141282	0.86989		Ga0212129_111679	0.142283	0.918365
Ga0212129_11168	-0.796328	-1.95932		Ga0212129_11168	-0.412648	-0.801687		Ga0212129_11168	-0.0572841	-0.156296			Ga0212129_11168	-0.137514	-0.561945		Ga0212129_11168	-0.115731	-0.486231		Ga0212129_11168	-0.367731	-1.52423			Ga0212129_11168	-0.285814	-1.17915		Ga0212129_11168	-0.276711	-1.1148		Ga0212129_11168	-0.294526	-1.2287			Ga0212129_11168	-0.0444021	-0.188709		Ga0212129_11168	-0.252457	-1.02675		Ga0212129_11168	-0.304479	-1.18687
Ga0212129_111680	0.503681	3.77567		Ga0212129_111680	0.348562	2.45277		Ga0212129_111680	0.470642	3.41685			Ga0212129_111680	0.406093	3.2942		Ga0212129_111680	0.434949	3.50229		Ga0212129_111680	0.44501	3.5892			Ga0212129_111680	0.379486	3.07314		Ga0212129_111680	0.353905	2.80133		Ga0212129_111680	0.337609	2.75789			Ga0212129_111680	0.381229	2.99614		Ga0212129_111680	0.429161	3.37822		Ga0212129_111680	0.422218	3.36812
Ga0212129_111681	-0.227775	-1.44866		Ga0212129_111681	0.0429658	0.232803		Ga0212129_111681	-0.0846321	-0.45806			Ga0212129_111681	0.0157753	0.0993862		Ga0212129_111681	0.0217255	0.138738		Ga0212129_111681	-0.0584381	-0.368428			Ga0212129_111681	-0.0558593	-0.367004		Ga0212129_111681	-0.0198138	-0.133147		Ga0212129_111681	-0.0632644	-0.409747			Ga0212129_111681	0.0541582	0.356031		Ga0212129_111681	-0.130331	-0.88803		Ga0212129_111681	-0.190314	-1.28579
Ga0212129_111682	0.170433	0.973158		Ga0212129_111682	0.129771	0.840666		Ga0212129_111682	-0.170496	-1.03685			Ga0212129_111682	0.15132	1.05126		Ga0212129_111682	0.0803411	0.561847		Ga0212129_111682	0.0813703	0.559085			Ga0212129_111682	0.17382	1.20535		Ga0212129_111682	0.117529	0.799109		Ga0212129_111682	0.165107	1.15246			Ga0212129_111682	0.0718879	0.471975		Ga0212129_111682	0.0807973	0.553221		Ga0212129_111682	0.110311	0.736237
Ga0212129_111683	-0.269511	-0.802403		Ga0212129_111683	-0.262893	-0.673286		Ga0212129_111683	0.255443	0.844438			Ga0212129_111683	0.176015	0.779802		Ga0212129_111683	0.0915544	0.331579		Ga0212129_111683	0.207968	0.927979			Ga0212129_111683	0.1417	0.562656		Ga0212129_111683	0.292585	1.41089		Ga0212129_111683	0.0445444	0.195218			Ga0212129_111683	0.358847	1.77478		Ga0212129_111683	0.245209	1.1842		Ga0212129_111683	0.077643	0.370708
Ga0212129_111685	-0.390278	-1.58127		Ga0212129_111685	-0.231769	-0.958243		Ga0212129_111685	0.174726	0.798283			Ga0212129_111685	-0.0951207	-0.476394		Ga0212129_111685	-0.233426	-1.09185		Ga0212129_111685	-0.0526949	-0.300456			Ga0212129_111685	-0.213529	-1.19772		Ga0212129_111685	-0.392943	-2.13522		Ga0212129_111685	-0.309056	-1.68851			Ga0212129_111685	-0.0841524	-0.414216		Ga0212129_111685	-0.116759	-0.593778		Ga0212129_111685	-0.122616	-0.680789
Ga0212129_111687	-0.129471	-0.540199		Ga0212129_111687	0.219003	0.884463		Ga0212129_111687	-0.260596	-1.08184			Ga0212129_111687	0.0394379	0.175328		Ga0212129_111687	-0.0442903	-0.185754		Ga0212129_111687	-0.12946	-0.565855			Ga0212129_111687	0.0530907	0.244797		Ga0212129_111687	0.151691	0.673382		Ga0212129_111687	0.0500738	0.211112			Ga0212129_111687	0.0154603	0.063264		Ga0212129_111687	0.0336555	0.135934		Ga0212129_111687	-0.0576973	-0.252654
Ga0212129_111688	-0.066863	-0.264363		Ga0212129_111688	0.296759	0.986525		Ga0212129_111688	0.430905	1.8905			Ga0212129_111688	0.115942	0.5618		Ga0212129_111688	0.175708	0.78858		Ga0212129_111688	0.0158604	0.0745369			Ga0212129_111688	0.241851	1.11988		Ga0212129_111688	0.0357749	0.168455		Ga0212129_111688	0.118343	0.617701			Ga0212129_111688	0.26318	1.23287		Ga0212129_111688	0.130105	0.622267		Ga0212129_111688	-0.0829897	-0.395262
Ga0212129_111689	0.252473	0.833949		Ga0212129_111689	0.511219	1.72515		Ga0212129_111689	0.471375	1.2896			Ga0212129_111689	0.491563	1.96586		Ga0212129_111689	0.323921	1.06974		Ga0212129_111689	0.562152	2.28995			Ga0212129_111689	0.43318	1.74687		Ga0212129_111689	0.401945	1.59395		Ga0212129_111689	0.329179	1.32329			Ga0212129_111689	0.658834	2.69222		Ga0212129_111689	0.636065	2.55163		Ga0212129_111689	0.415625	1.64363
Ga0212129_11169	0.148186	0.74513		Ga0212129_11169	-0.108461	-0.382989		Ga0212129_11169	0.320348	1.2553			Ga0212129_11169	0.111817	0.548894		Ga0212129_11169	0.139166	0.703693		Ga0212129_11169	0.116545	0.617911			Ga0212129_11169	0.251006	1.25964		Ga0212129_11169	0.140089	0.650918		Ga0212129_11169	0.0316457	0.152072			Ga0212129_11169	0.156394	0.774126		Ga0212129_11169	0.0705929	0.347324		Ga0212129_11169	0.0160435	0.0863473
Ga0212129_111690	0.261206	1.75385		Ga0212129_111690	0.0754024	0.474674		Ga0212129_111690	0.0675135	0.466299			Ga0212129_111690	0.184691	1.42475		Ga0212129_111690	0.1755	1.29073		Ga0212129_111690	0.156075	1.13194			Ga0212129_111690	0.331807	2.53176		Ga0212129_111690	0.195859	1.40744		Ga0212129_111690	0.141877	1.0647			Ga0212129_111690	0.264694	1.88203		Ga0212129_111690	0.147249	1.10794		Ga0212129_111690	0.106074	0.805798
Ga0212129_111691	-0.769562	-2.64		Ga0212129_111691	-1.30751	-3.21087		Ga0212129_111691	-0.37055	-0.764351			Ga0212129_111691	-0.334885	-1.4209		Ga0212129_111691	-0.610355	-2.04002		Ga0212129_111691	-0.418068	-1.41586			Ga0212129_111691	-0.523183	-1.47758		Ga0212129_111691	-0.358383	-0.922176		Ga0212129_111691	-0.41617	-1.12307			Ga0212129_111691	-0.640094	-2.16968		Ga0212129_111691	-0.650001	-2.14784		Ga0212129_111691	-0.711215	-2.4946
Ga0212129_111694	-0.145385	-0.372148		Ga0212129_111694	-0.163633	-0.296484		Ga0212129_111694	-0.527174	-1.00305			Ga0212129_111694	-0.299941	-0.943745		Ga0212129_111694	-0.260932	-0.895169		Ga0212129_111694	-0.2371	-0.831479			Ga0212129_111694	-0.0997354	-0.327812		Ga0212129_111694	-0.374466	-1.10934		Ga0212129_111694	-0.249754	-0.861605			Ga0212129_111694	-0.253425	-0.812352		Ga0212129_111694	-0.224544	-0.681504		Ga0212129_111694	-0.376878	-1.35025
Ga0212129_111697	-0.0717485	-0.398542		Ga0212129_111697	0.0863125	0.50244		Ga0212129_111697	0.0205243	0.124002			Ga0212129_111697	0.0548719	0.374464		Ga0212129_111697	-0.0352851	-0.239091		Ga0212129_111697	-0.0425652	-0.270198			Ga0212129_111697	0.0760317	0.476965		Ga0212129_111697	-0.175088	-1.14864		Ga0212129_111697	-0.107676	-0.707478			Ga0212129_111697	0.074425	0.489232		Ga0212129_111697	-0.035517	-0.227799		Ga0212129_111697	-0.0190977	-0.124704
Ga0212129_111698	0.219004	1.37881		Ga0212129_111698	-0.51088	-2.24496		Ga0212129_111698	-0.0457617	-0.254276			Ga0212129_111698	0.00080843	0.00457987		Ga0212129_111698	-0.0119173	-0.0707102		Ga0212129_111698	-0.206254	-1.14685			Ga0212129_111698	0.113158	0.661338		Ga0212129_111698	0.012971	0.0751041		Ga0212129_111698	-0.0847919	-0.535291			Ga0212129_111698	-0.0538332	-0.306969		Ga0212129_111698	-0.0570464	-0.318041		Ga0212129_111698	-0.0367295	-0.218096
Ga0212129_111699	0.373303	1.99887		Ga0212129_111699	0.117469	0.551739		Ga0212129_111699	-0.0321568	-0.143008			Ga0212129_111699	0.186975	0.959313		Ga0212129_111699	0.185417	1.08954		Ga0212129_111699	0.147338	0.743975			Ga0212129_111699	0.242591	1.22765		Ga0212129_111699	0.126268	0.659271		Ga0212129_111699	0.0166528	0.0935898			Ga0212129_111699	0.298661	1.53257		Ga0212129_111699	0.199085	1.06949		Ga0212129_111699	0.083604	0.422423
Ga0212129_11170	0.182262	0.954347		Ga0212129_11170	0.486248	2.42737		Ga0212129_11170	0.119797	0.613171			Ga0212129_11170	0.193314	1.18455		Ga0212129_11170	0.322545	1.94174		Ga0212129_11170	0.300721	1.66083			Ga0212129_11170	0.226942	1.39431		Ga0212129_11170	0.237452	1.33205		Ga0212129_11170	0.188527	1.19257			Ga0212129_11170	0.21943	1.23967		Ga0212129_11170	0.214862	1.25602		Ga0212129_11170	0.178135	1.06844
Ga0212129_111700	0.226643	0.517376		Ga0212129_111700	0.423015	0.743498		Ga0212129_111700	-0.446842	-1.06712			Ga0212129_111700	-0.0709027	-0.191093		Ga0212129_111700	-0.073985	-0.159933		Ga0212129_111700	-0.364851	-0.934705			Ga0212129_111700	0.0899042	0.184457		Ga0212129_111700	-0.42111	-1.31357		Ga0212129_111700	-0.451166	-0.967799			Ga0212129_111700	-0.4553	-0.871831		Ga0212129_111700	-0.0974509	-0.226639		Ga0212129_111700	-0.31346	-0.722053
Ga0212129_111702	-0.130204	-0.363994		Ga0212129_111702	-0.912343	-2.54305		Ga0212129_111702	-0.852987	-3.05957			Ga0212129_111702	-0.253986	-1.07314		Ga0212129_111702	-0.540473	-2.21651		Ga0212129_111702	-0.394628	-1.63632			Ga0212129_111702	-0.349452	-1.52329		Ga0212129_111702	-0.246659	-0.999825		Ga0212129_111702	-0.443788	-1.53524			Ga0212129_111702	-0.263437	-0.962616		Ga0212129_111702	-0.191662	-0.774726		Ga0212129_111702	-0.324724	-1.16463
Ga0212129_111703	0.537485	2.30595		Ga0212129_111703	0.165712	0.492545		Ga0212129_111703	0.110631	0.345231			Ga0212129_111703	0.223307	0.879396		Ga0212129_111703	0.0987921	0.346339		Ga0212129_111703	0.156878	0.586012			Ga0212129_111703	0.288854	1.04752		Ga0212129_111703	0.178866	0.580923		Ga0212129_111703	0.278647	1.05767			Ga0212129_111703	0.43524	1.50195		Ga0212129_111703	0.0753141	0.245399		Ga0212129_111703	0.0759087	0.232224
Ga0212129_111704	0.399554	0.876001		Ga0212129_111704	-0.322802	-0.638533		Ga0212129_111704	0.302283	0.800287			Ga0212129_111704	0.371445	1.01416		Ga0212129_111704	0.25437	0.779753		Ga0212129_111704	0.211667	0.601495			Ga0212129_111704	0.42894	1.01031		Ga0212129_111704	0.185895	0.455639		Ga0212129_111704	0.23987	0.648424			Ga0212129_111704	0.0214885	0.0423016		Ga0212129_111704	0.304338	0.703565		Ga0212129_111704	0.250848	0.552411
Ga0212129_111705	0.443737	1.51598		Ga0212129_111705	-0.486927	-1.10761		Ga0212129_111705	-0.230198	-0.757315			Ga0212129_111705	0.0615351	0.205351		Ga0212129_111705	-0.215477	-0.727114		Ga0212129_111705	-0.327403	-1.48291			Ga0212129_111705	-0.0372183	-0.164124		Ga0212129_111705	-0.145215	-0.563708		Ga0212129_111705	-0.127762	-0.521031			Ga0212129_111705	0.145011	0.617012		Ga0212129_111705	-0.0211708	-0.0771851		Ga0212129_111705	0.00639577	0.0254786
Ga0212129_111707	-0.179675	-0.462355		Ga0212129_111707	-0.520583	-1.35728		Ga0212129_111707	0.25469	0.506562			Ga0212129_111707	0.0433848	0.157556		Ga0212129_111707	-0.0584584	-0.217235		Ga0212129_111707	-0.366066	-1.13032			Ga0212129_111707	0.315901	1.20808		Ga0212129_111707	-0.0605195	-0.199874		Ga0212129_111707	-0.287445	-0.740599			Ga0212129_111707	-0.203668	-0.643391		Ga0212129_111707	-0.244042	-0.653425		Ga0212129_111707	-0.0550324	-0.197204
Ga0212129_11171	-0.0255817	-0.143879		Ga0212129_11171	0.00109933	0.00556797		Ga0212129_11171	-0.0163728	-0.0832771			Ga0212129_11171	-0.0772485	-0.472262		Ga0212129_11171	-0.0209011	-0.135668		Ga0212129_11171	-0.0974707	-0.579357			Ga0212129_11171	-0.125309	-0.763798		Ga0212129_11171	-0.0610612	-0.379225		Ga0212129_11171	-0.0510913	-0.343115			Ga0212129_11171	-0.0345503	-0.206793		Ga0212129_11171	-0.0767084	-0.509802		Ga0212129_11171	-0.126387	-0.768354
Ga0212129_111712	0.0578302	0.20357		Ga0212129_111712	0.00274493	0.0104428		Ga0212129_111712	-0.141776	-0.575447			Ga0212129_111712	-0.140042	-0.500232		Ga0212129_111712	-0.154266	-0.63427		Ga0212129_111712	-0.511045	-2.35572			Ga0212129_111712	-0.151151	-0.580685		Ga0212129_111712	-0.133657	-0.435879		Ga0212129_111712	-0.281365	-1.18574			Ga0212129_111712	-0.189614	-0.650807		Ga0212129_111712	-0.432442	-1.65636		Ga0212129_111712	-0.317855	-1.2454
Ga0212129_111719	0.217332	0.563812		Ga0212129_111719	-0.880805	-1.56536		Ga0212129_111719	-0.489912	-1.10245			Ga0212129_111719	-0.15462	-0.346266		Ga0212129_111719	-0.306923	-0.924368		Ga0212129_111719	-0.624411	-1.29711			Ga0212129_111719	-0.376008	-0.878903		Ga0212129_111719	0.0846686	0.255309		Ga0212129_111719	-0.429526	-1.098			Ga0212129_111719	-0.138449	-0.441878		Ga0212129_111719	-0.512648	-1.53486		Ga0212129_111719	-0.411616	-1.16451
Ga0212129_11172	-0.0900769	-0.463092		Ga0212129_11172	0.101894	0.543252		Ga0212129_11172	0.110072	0.587932			Ga0212129_11172	0.062464	0.401372		Ga0212129_11172	0.285906	1.74107		Ga0212129_11172	0.223498	1.36365			Ga0212129_11172	0.269376	1.62648		Ga0212129_11172	0.185429	1.11342		Ga0212129_11172	0.167351	1.00759			Ga0212129_11172	0.156051	0.951787		Ga0212129_11172	0.153795	0.988991		Ga0212129_11172	0.146511	0.923955
Ga0212129_111725	-0.163143	-0.895104		Ga0212129_111725	-0.231564	-1.16375		Ga0212129_111725	-0.0939655	-0.524534			Ga0212129_111725	-0.0921832	-0.595066		Ga0212129_111725	-0.302744	-1.96751		Ga0212129_111725	-0.25506	-1.63563			Ga0212129_111725	0.0558067	0.332205		Ga0212129_111725	-0.240054	-1.50951		Ga0212129_111725	-0.188658	-1.2039			Ga0212129_111725	-0.111218	-0.739302		Ga0212129_111725	-0.339743	-1.92002		Ga0212129_111725	-0.213615	-1.37405
Ga0212129_111726	0.310264	1.68443		Ga0212129_111726	0.202589	0.802232		Ga0212129_111726	0.331958	1.66976			Ga0212129_111726	0.340764	2.1726		Ga0212129_111726	0.276586	1.66267		Ga0212129_111726	0.250372	1.58626			Ga0212129_111726	0.434252	2.47188		Ga0212129_111726	0.258652	1.45885		Ga0212129_111726	0.198531	1.13553			Ga0212129_111726	0.30162	1.85427		Ga0212129_111726	0.15917	0.946102		Ga0212129_111726	0.113227	0.666614
Ga0212129_111727	0.376847	1.9021		Ga0212129_111727	0.224074	1.02805		Ga0212129_111727	-0.13709	-0.662785			Ga0212129_111727	0.557146	3.41309		Ga0212129_111727	0.368535	2.29386		Ga0212129_111727	0.372464	2.15704			Ga0212129_111727	0.59408	3.72049		Ga0212129_111727	0.387951	2.38076		Ga0212129_111727	0.432595	2.61132			Ga0212129_111727	0.537005	3.33667		Ga0212129_111727	0.420505	2.48464		Ga0212129_111727	0.308402	1.72978
Ga0212129_111728	-0.157599	-0.801865		Ga0212129_111728	-0.340412	-1.40856		Ga0212129_111728	-0.085601	-0.35685			Ga0212129_111728	-0.0827315	-0.46515		Ga0212129_111728	-0.297152	-1.52853		Ga0212129_111728	-0.232314	-1.48541			Ga0212129_111728	-0.0370181	-0.242488		Ga0212129_111728	-0.163154	-0.831871		Ga0212129_111728	-0.150906	-0.883177			Ga0212129_111728	-0.0261176	-0.142394		Ga0212129_111728	-0.249403	-1.55579		Ga0212129_111728	-0.287938	-1.57671
Ga0212129_111729	0.248381	0.773298		Ga0212129_111729	-0.200517	-0.84428		Ga0212129_111729	0.299184	1.04596			Ga0212129_111729	0.224784	1.15843		Ga0212129_111729	0.14984	0.742286		Ga0212129_111729	0.048664	0.225544			Ga0212129_111729	0.149449	0.775045		Ga0212129_111729	0.054318	0.248698		Ga0212129_111729	0.0202736	0.104821			Ga0212129_111729	0.111406	0.544916		Ga0212129_111729	-0.0593203	-0.298788		Ga0212129_111729	0.0164573	0.0831027
Ga0212129_11173	0.381139	1.68121		Ga0212129_11173	0.0626804	0.225764		Ga0212129_11173	0.339161	1.6567			Ga0212129_11173	0.229196	1.03612		Ga0212129_11173	0.373668	1.9254		Ga0212129_11173	0.339085	1.68375			Ga0212129_11173	0.234353	1.09862		Ga0212129_11173	0.324795	1.58002		Ga0212129_11173	0.211565	0.946051			Ga0212129_11173	0.219237	1.14333		Ga0212129_11173	0.26713	1.2363		Ga0212129_11173	0.180059	0.827024
Ga0212129_111730	0.335705	1.20546		Ga0212129_111730	0.0863706	0.226872		Ga0212129_111730	0.103058	0.317119			Ga0212129_111730	-0.0966618	-0.374763		Ga0212129_111730	-0.568077	-1.70923		Ga0212129_111730	-0.432637	-1.80233			Ga0212129_111730	-0.266447	-0.914911		Ga0212129_111730	-0.260929	-1.05842		Ga0212129_111730	-0.544936	-2.14704			Ga0212129_111730	-0.203276	-0.777891		Ga0212129_111730	-0.571471	-2.72684		Ga0212129_111730	-0.318659	-1.30212
Ga0212129_111731	-0.369986	-1.34506		Ga0212129_111731	-0.557484	-1.97504		Ga0212129_111731	-0.698471	-3.19329			Ga0212129_111731	-0.51139	-2.12295		Ga0212129_111731	-0.349195	-1.65187		Ga0212129_111731	-0.30577	-1.4633			Ga0212129_111731	-0.238067	-1.1149		Ga0212129_111731	-0.330586	-1.513		Ga0212129_111731	-0.457362	-2.01698			Ga0212129_111731	-0.202726	-0.807593		Ga0212129_111731	-0.631081	-2.63741		Ga0212129_111731	-0.520596	-2.15721
Ga0212129_111732	-0.203472	-0.825541		Ga0212129_111732	0.121286	0.388725		Ga0212129_111732	-0.317721	-1.30113			Ga0212129_111732	-0.311239	-1.57603		Ga0212129_111732	-0.31541	-1.31968		Ga0212129_111732	-0.310718	-1.30285			Ga0212129_111732	-0.152684	-0.685641		Ga0212129_111732	-0.181519	-0.707999		Ga0212129_111732	-0.20818	-0.839951			Ga0212129_111732	-0.219485	-1.03169		Ga0212129_111732	-0.354357	-1.45261		Ga0212129_111732	-0.31857	-1.19966
Ga0212129_111733	0.126436	0.581134		Ga0212129_111733	0.0373538	0.167184		Ga0212129_111733	-0.275374	-1.12872			Ga0212129_111733	0.154626	0.865656		Ga0212129_111733	0.17204	0.945565		Ga0212129_111733	0.0441427	0.232552			Ga0212129_111733	0.220817	1.09132		Ga0212129_111733	0.0462564	0.251463		Ga0212129_111733	-0.0156176	-0.0828762			Ga0212129_111733	0.207428	1.05489		Ga0212129_111733	-0.0343076	-0.199657		Ga0212129_111733	-0.0185048	-0.117574
Ga0212129_111734	-0.207495	-1.07849		Ga0212129_111734	-0.139715	-0.592359		Ga0212129_111734	-0.18872	-1.01643			Ga0212129_111734	0.157077	0.930879		Ga0212129_111734	0.018463	0.105784		Ga0212129_111734	0.0183308	0.107626			Ga0212129_111734	0.060674	0.358223		Ga0212129_111734	0.000902458	0.0051298		Ga0212129_111734	-0.00428676	-0.0239163			Ga0212129_111734	0.100425	0.534433		Ga0212129_111734	0.00390981	0.0245005		Ga0212129_111734	-0.0154082	-0.0917827
Ga0212129_111735	0.428398	1.49978		Ga0212129_111735	-0.127797	-0.540356		Ga0212129_111735	-0.258803	-0.911044			Ga0212129_111735	-0.0119221	-0.0547591		Ga0212129_111735	-0.0153412	-0.0708096		Ga0212129_111735	-0.0640594	-0.309139			Ga0212129_111735	0.1403	0.662003		Ga0212129_111735	-0.071399	-0.331277		Ga0212129_111735	-0.0275638	-0.135577			Ga0212129_111735	0.208818	0.955955		Ga0212129_111735	-0.0641618	-0.275565		Ga0212129_111735	-0.186065	-0.890589
Ga0212129_111736	-0.102082	-0.446228		Ga0212129_111736	-0.0595577	-0.163891		Ga0212129_111736	0.115767	0.502918			Ga0212129_111736	0.210643	1.07167		Ga0212129_111736	0.0358297	0.150867		Ga0212129_111736	-0.0202134	-0.084866			Ga0212129_111736	0.179984	0.767314		Ga0212129_111736	0.0135648	0.0671929		Ga0212129_111736	-0.0213074	-0.0929748			Ga0212129_111736	0.234021	1.06109		Ga0212129_111736	-0.0949401	-0.428604		Ga0212129_111736	0.00928345	0.0413303
Ga0212129_111737	0.355702	1.99816		Ga0212129_111737	-0.298082	-1.2466		Ga0212129_111737	-0.0693386	-0.354668			Ga0212129_111737	0.237823	1.50646		Ga0212129_111737	0.100821	0.641061		Ga0212129_111737	0.0749816	0.476355			Ga0212129_111737	0.238568	1.48958		Ga0212129_111737	0.0554074	0.345555		Ga0212129_111737	0.00676912	0.0429228			Ga0212129_111737	0.309606	1.92234		Ga0212129_111737	0.0140613	0.0876651		Ga0212129_111737	0.103799	0.649591
Ga0212129_111738	0.333941	1.74297		Ga0212129_111738	0.0254714	0.124362		Ga0212129_111738	0.0795165	0.485515			Ga0212129_111738	0.247359	1.53297		Ga0212129_111738	0.173477	1.08772		Ga0212129_111738	0.130058	0.781544			Ga0212129_111738	0.353459	2.14883		Ga0212129_111738	0.16907	1.03912		Ga0212129_111738	0.233564	1.5481			Ga0212129_111738	0.314024	2.00053		Ga0212129_111738	0.161957	0.924364		Ga0212129_111738	0.109129	0.70143
Ga0212129_111739	0.154664	0.691438		Ga0212129_111739	-0.0619424	-0.248662		Ga0212129_111739	-0.409489	-1.84165			Ga0212129_111739	-0.0103304	-0.0429693		Ga0212129_111739	-0.0560377	-0.232496		Ga0212129_111739	-0.00451213	-0.0185913			Ga0212129_111739	0.155367	0.663364		Ga0212129_111739	-0.021589	-0.081072		Ga0212129_111739	-0.0644395	-0.251687			Ga0212129_111739	0.0963597	0.398549		Ga0212129_111739	-0.10697	-0.43443		Ga0212129_111739	-0.167462	-0.686277
Ga0212129_111740	0.309175	1.36791		Ga0212129_111740	0.305853	1.30095		Ga0212129_111740	-0.29756	-1.26977			Ga0212129_111740	0.312716	1.72553		Ga0212129_111740	0.156763	0.759921		Ga0212129_111740	0.17167	0.797789			Ga0212129_111740	0.270748	1.37884		Ga0212129_111740	0.225343	1.09991		Ga0212129_111740	0.0967009	0.496877			Ga0212129_111740	0.370008	1.95016		Ga0212129_111740	0.121135	0.539685		Ga0212129_111740	0.109931	0.567964
Ga0212129_111741	-0.358886	-1.11039		Ga0212129_111741	-0.405896	-1.03183		Ga0212129_111741	-0.128257	-0.292661			Ga0212129_111741	0.33676	1.47643		Ga0212129_111741	-0.0741509	-0.321166		Ga0212129_111741	-0.140085	-0.6061			Ga0212129_111741	0.396543	1.76831		Ga0212129_111741	0.0223086	0.0952016		Ga0212129_111741	-0.0301461	-0.130343			Ga0212129_111741	0.217896	0.960591		Ga0212129_111741	-0.0568469	-0.241059		Ga0212129_111741	0.234774	1.01579
Ga0212129_111742	0.0910182	0.280563		Ga0212129_111742	0.621991	1.61268		Ga0212129_111742	0.0245182	0.0887579			Ga0212129_111742	0.27718	1.12657		Ga0212129_111742	0.207337	0.724183		Ga0212129_111742	0.211518	0.779234			Ga0212129_111742	0.251662	0.820106		Ga0212129_111742	-0.00616753	-0.0219224		Ga0212129_111742	0.166029	0.641099			Ga0212129_111742	0.165109	0.543026		Ga0212129_111742	0.0750375	0.309322		Ga0212129_111742	0.186291	0.71881
Ga0212129_111743	0.00507136	0.0182476		Ga0212129_111743	-0.568629	-1.51952		Ga0212129_111743	0.0350505	0.107853			Ga0212129_111743	0.0741083	0.21661		Ga0212129_111743	0.146404	0.460364		Ga0212129_111743	0.11204	0.37904			Ga0212129_111743	0.277792	0.960308		Ga0212129_111743	0.175038	0.592089		Ga0212129_111743	-0.094532	-0.280137			Ga0212129_111743	0.270617	0.75438		Ga0212129_111743	-0.0193964	-0.0645934		Ga0212129_111743	0.0780612	0.283278
Ga0212129_111744	0.268209	1.30763		Ga0212129_111744	0.31864	1.49209		Ga0212129_111744	-0.0404117	-0.21239			Ga0212129_111744	0.385418	2.24541		Ga0212129_111744	0.435519	2.5539		Ga0212129_111744	0.218955	1.29592			Ga0212129_111744	0.422141	2.52895		Ga0212129_111744	0.330094	1.79841		Ga0212129_111744	0.175242	0.954046			Ga0212129_111744	0.358514	2.02489		Ga0212129_111744	0.175902	1.05384		Ga0212129_111744	0.224658	1.35395
Ga0212129_111745	-0.120219	-0.447686		Ga0212129_111745	-0.0092811	-0.0303576		Ga0212129_111745	0.039277	0.172301			Ga0212129_111745	0.247196	1.27754		Ga0212129_111745	-0.105638	-0.498317		Ga0212129_111745	-0.17036	-0.735933			Ga0212129_111745	0.0859071	0.421968		Ga0212129_111745	-0.0665541	-0.309371		Ga0212129_111745	-0.226657	-1.0538			Ga0212129_111745	-0.136623	-0.623726		Ga0212129_111745	-0.241788	-1.12588		Ga0212129_111745	-0.102287	-0.514531
Ga0212129_111746	0.252036	0.768981		Ga0212129_111746	0.276279	0.786929		Ga0212129_111746	-0.394753	-0.943837			Ga0212129_111746	0.161574	0.57303		Ga0212129_111746	-0.0105383	-0.0331636		Ga0212129_111746	-0.0227375	-0.0746696			Ga0212129_111746	0.24144	0.80525		Ga0212129_111746	-0.0754533	-0.235609		Ga0212129_111746	0.0570135	0.201379			Ga0212129_111746	0.23721	0.787679		Ga0212129_111746	-0.269442	-0.986651		Ga0212129_111746	-0.00109833	-0.00381832
Ga0212129_111748	-0.48839	-2.9358		Ga0212129_111748	-0.766959	-3.93017		Ga0212129_111748	-0.657301	-3.36683			Ga0212129_111748	-0.504896	-3.23654		Ga0212129_111748	-0.641684	-4.26814		Ga0212129_111748	-0.800133	-5.16798			Ga0212129_111748	-0.585434	-3.80818		Ga0212129_111748	-0.681425	-4.46655		Ga0212129_111748	-1.07108	-6.44595			Ga0212129_111748	-0.545965	-3.68273		Ga0212129_111748	-0.84459	-5.25257		Ga0212129_111748	-0.905196	-5.70401
Ga0212129_111749	-0.0852478	-0.376585		Ga0212129_111749	-0.554867	-1.85935		Ga0212129_111749	-0.631674	-2.58253			Ga0212129_111749	-0.168377	-0.974745		Ga0212129_111749	-0.291304	-1.5459		Ga0212129_111749	-0.42193	-2.51846			Ga0212129_111749	-0.293036	-1.76562		Ga0212129_111749	-0.305839	-1.69012		Ga0212129_111749	-0.42068	-2.32903			Ga0212129_111749	-0.24718	-1.2981		Ga0212129_111749	-0.311902	-1.75357		Ga0212129_111749	-0.36525	-2.15192
Ga0212129_11175	-0.0078461	-0.027689		Ga0212129_11175	0.282075	0.959477		Ga0212129_11175	0.357723	1.64778			Ga0212129_11175	0.0363317	0.154429		Ga0212129_11175	0.0258857	0.120829		Ga0212129_11175	-0.0218278	-0.0914049			Ga0212129_11175	-0.0800226	-0.287404		Ga0212129_11175	-0.150899	-0.576618		Ga0212129_11175	0.0866341	0.360461			Ga0212129_11175	-0.116805	-0.460289		Ga0212129_11175	-0.168501	-0.726831		Ga0212129_11175	0.0593822	0.257704
Ga0212129_111750	0.265683	1.00362		Ga0212129_111750	-0.190802	-0.696025		Ga0212129_111750	-0.0637266	-0.273112			Ga0212129_111750	0.00518128	0.0209374		Ga0212129_111750	-0.166279	-0.742829		Ga0212129_111750	-0.180905	-0.946307			Ga0212129_111750	0.216159	1.10057		Ga0212129_111750	0.0166428	0.0793374		Ga0212129_111750	-0.094843	-0.509434			Ga0212129_111750	0.0922485	0.413638		Ga0212129_111750	-0.185398	-0.735285		Ga0212129_111750	0.0937435	0.375448
Ga0212129_111751	-0.184632	-0.826563		Ga0212129_111751	-0.66518	-2.0343		Ga0212129_111751	0.0640078	0.296186			Ga0212129_111751	0.295276	1.47957		Ga0212129_111751	0.162119	0.797663		Ga0212129_111751	0.113794	0.502424			Ga0212129_111751	0.358648	1.64112		Ga0212129_111751	0.0954373	0.415736		Ga0212129_111751	0.0948165	0.447548			Ga0212129_111751	0.230441	1.0315		Ga0212129_111751	0.0454282	0.221709		Ga0212129_111751	0.120083	0.576021
Ga0212129_111752	0.0682725	0.262931		Ga0212129_111752	-0.540968	-1.73996		Ga0212129_111752	-0.0799115	-0.332128			Ga0212129_111752	0.0890309	0.402919		Ga0212129_111752	-0.117775	-0.536517		Ga0212129_111752	-0.252747	-1.12475			Ga0212129_111752	-0.00474354	-0.0219611		Ga0212129_111752	-0.455526	-2.05601		Ga0212129_111752	-0.0959258	-0.43987			Ga0212129_111752	0.0368035	0.193191		Ga0212129_111752	-0.248577	-1.11167		Ga0212129_111752	-0.225387	-1.00442
Ga0212129_111753	-0.474596	-2.12639		Ga0212129_111753	-0.290764	-1.19076		Ga0212129_111753	-0.406254	-2.10491			Ga0212129_111753	-0.158513	-0.763126		Ga0212129_111753	-0.292316	-1.58802		Ga0212129_111753	-0.374855	-1.81962			Ga0212129_111753	-0.228147	-1.1914		Ga0212129_111753	-0.222756	-1.11905		Ga0212129_111753	-0.292688	-1.44427			Ga0212129_111753	0.0278641	0.154438		Ga0212129_111753	-0.224818	-1.24908		Ga0212129_111753	-0.470488	-2.25093
Ga0212129_111754	0.200905	1.09174		Ga0212129_111754	0.154297	0.704406		Ga0212129_111754	0.419027	2.23981			Ga0212129_111754	0.408427	2.67057		Ga0212129_111754	0.244008	1.49355		Ga0212129_111754	0.115415	0.700603			Ga0212129_111754	0.358559	2.13396		Ga0212129_111754	0.329626	2.02829		Ga0212129_111754	0.152673	0.922703			Ga0212129_111754	0.427842	2.57403		Ga0212129_111754	0.228239	1.31764		Ga0212129_111754	0.336419	2.05497
Ga0212129_111755	0.115296	0.637343		Ga0212129_111755	0.204075	1.11425		Ga0212129_111755	0.0630907	0.37041			Ga0212129_111755	0.187064	1.23157		Ga0212129_111755	0.0779029	0.497059		Ga0212129_111755	0.0899687	0.565631			Ga0212129_111755	0.341986	2.24691		Ga0212129_111755	0.110466	0.739872		Ga0212129_111755	0.137815	0.894574			Ga0212129_111755	0.265925	1.68361		Ga0212129_111755	0.0925483	0.575816		Ga0212129_111755	0.00878616	0.0534555
Ga0212129_111756	0.244675	0.926323		Ga0212129_111756	-0.447832	-1.65482		Ga0212129_111756	-0.170166	-0.797636			Ga0212129_111756	0.156822	0.696197		Ga0212129_111756	-0.285001	-1.28735		Ga0212129_111756	-0.0694626	-0.345655			Ga0212129_111756	-0.0057711	-0.0275322		Ga0212129_111756	-0.118546	-0.549956		Ga0212129_111756	-0.156616	-0.65962			Ga0212129_111756	-0.0326415	-0.175013		Ga0212129_111756	0.0123278	0.0598804		Ga0212129_111756	-0.0494153	-0.24312
Ga0212129_111757	0.324165	1.31717		Ga0212129_111757	0.421879	1.72797		Ga0212129_111757	-0.124098	-0.551809			Ga0212129_111757	0.295572	1.48244		Ga0212129_111757	0.0884622	0.432021		Ga0212129_111757	0.0944665	0.481321			Ga0212129_111757	0.334154	1.60826		Ga0212129_111757	0.114865	0.51993		Ga0212129_111757	0.0477185	0.252573			Ga0212129_111757	0.302915	1.47092		Ga0212129_111757	-0.0501767	-0.241109		Ga0212129_111757	-0.0258806	-0.123379
Ga0212129_111758	0.380352	1.77423		Ga0212129_111758	-0.191327	-0.758688		Ga0212129_111758	-0.0171178	-0.067168			Ga0212129_111758	0.22354	1.21059		Ga0212129_111758	0.106177	0.546253		Ga0212129_111758	0.11049	0.522459			Ga0212129_111758	0.302688	1.45939		Ga0212129_111758	0.203651	0.910605		Ga0212129_111758	0.137788	0.710225			Ga0212129_111758	0.280953	1.4807		Ga0212129_111758	0.220888	1.13427		Ga0212129_111758	0.0803909	0.409761
Ga0212129_111759	0.245666	1.42509		Ga0212129_111759	0.201021	0.977055		Ga0212129_111759	-0.251733	-1.13494			Ga0212129_111759	0.343634	2.33223		Ga0212129_111759	0.207389	1.37252		Ga0212129_111759	0.0439671	0.288122			Ga0212129_111759	0.268219	1.70486		Ga0212129_111759	0.048311	0.317535		Ga0212129_111759	0.026409	0.179026			Ga0212129_111759	0.31141	2.10787		Ga0212129_111759	0.110682	0.742057		Ga0212129_111759	0.1333	0.893217
Ga0212129_11176	-0.157402	-0.914848		Ga0212129_11176	-0.0101517	-0.0451706		Ga0212129_11176	-0.0522846	-0.274046			Ga0212129_11176	-0.0689775	-0.457239		Ga0212129_11176	0.0395882	0.253161		Ga0212129_11176	0.00404345	0.0264017			Ga0212129_11176	-0.111288	-0.737054		Ga0212129_11176	0.138376	0.911753		Ga0212129_11176	-0.0198112	-0.126586			Ga0212129_11176	0.0156851	0.114476		Ga0212129_11176	-0.0577516	-0.378752		Ga0212129_11176	-0.0307771	-0.20219
Ga0212129_111760	0.0570543	0.266484		Ga0212129_111760	-0.144789	-0.550009		Ga0212129_111760	0.0788267	0.251014			Ga0212129_111760	0.285059	1.69096		Ga0212129_111760	0.185086	0.985762		Ga0212129_111760	0.133404	0.679776			Ga0212129_111760	0.197553	1.06222		Ga0212129_111760	0.267589	1.3447		Ga0212129_111760	0.0812857	0.473791			Ga0212129_111760	0.252284	1.2426		Ga0212129_111760	-0.0703231	-0.376424		Ga0212129_111760	-0.0585816	-0.321649
Ga0212129_111762	-0.179183	-0.85077		Ga0212129_111762	-0.428255	-1.96104		Ga0212129_111762	-0.437972	-2.11152			Ga0212129_111762	-0.0161123	-0.102194		Ga0212129_111762	-0.234501	-1.36128		Ga0212129_111762	-0.381875	-2.05514			Ga0212129_111762	-0.162903	-0.980649		Ga0212129_111762	-0.332489	-1.85065		Ga0212129_111762	-0.264748	-1.42706			Ga0212129_111762	-0.147718	-0.822279		Ga0212129_111762	-0.321433	-1.92557		Ga0212129_111762	-0.245335	-1.5525
Ga0212129_111763	-0.149563	-0.587342		Ga0212129_111763	-0.492537	-1.29072		Ga0212129_111763	-0.686822	-1.75808			Ga0212129_111763	-0.0680505	-0.303752		Ga0212129_111763	-0.242071	-1.12613		Ga0212129_111763	-0.088397	-0.402744			Ga0212129_111763	-0.159562	-0.586316		Ga0212129_111763	-0.242081	-1.21564		Ga0212129_111763	-0.257949	-1.27071			Ga0212129_111763	-0.229654	-0.845107		Ga0212129_111763	-0.257028	-1.1645		Ga0212129_111763	-0.337355	-1.39363
Ga0212129_111764	-0.618084	-3.37146		Ga0212129_111764	-1.08134	-3.72317		Ga0212129_111764	-2.28901	-8.976			Ga0212129_111764	-0.630751	-3.96377		Ga0212129_111764	-1.12503	-7.01507		Ga0212129_111764	-2.17427	-12.5907			Ga0212129_111764	-0.756126	-4.57327		Ga0212129_111764	-1.56826	-8.39351		Ga0212129_111764	-2.423	-14.3641			Ga0212129_111764	-0.606246	-3.83623		Ga0212129_111764	-2.56004	-14.0888		Ga0212129_111764	-2.56339	-13.8173
Ga0212129_111765	0.774942	2.45122		Ga0212129_111765	0.110725	0.20364		Ga0212129_111765	-0.0635136	-0.15679			Ga0212129_111765	0.181052	0.526632		Ga0212129_111765	0.067182	0.160364		Ga0212129_111765	0.329113	0.838348			Ga0212129_111765	0.354877	1.01451		Ga0212129_111765	0.389087	1.18182		Ga0212129_111765	0.472371	1.25809			Ga0212129_111765	0.393401	1.16797		Ga0212129_111765	0.172382	0.421166		Ga0212129_111765	0.241276	0.815695
Ga0212129_111766	0.1424	0.879064		Ga0212129_111766	-0.165484	-0.862326		Ga0212129_111766	0.0501646	0.327629			Ga0212129_111766	0.146648	1.0697		Ga0212129_111766	-0.000874052	-0.00630998		Ga0212129_111766	-0.095494	-0.66256			Ga0212129_111766	0.0794375	0.585992		Ga0212129_111766	0.0678053	0.493788		Ga0212129_111766	-0.0198646	-0.141472			Ga0212129_111766	0.116971	0.851722		Ga0212129_111766	-0.111691	-0.781579		Ga0212129_111766	-0.0700991	-0.497089
Ga0212129_111767	0.165328	0.769744		Ga0212129_111767	0.176139	1.00438		Ga0212129_111767	0.108994	0.541619			Ga0212129_111767	0.373336	2.27921		Ga0212129_111767	0.294409	1.7563		Ga0212129_111767	0.191354	1.11088			Ga0212129_111767	0.368723	2.1333		Ga0212129_111767	0.293994	1.74986		Ga0212129_111767	0.248799	1.40959			Ga0212129_111767	0.357245	2.10182		Ga0212129_111767	0.190858	1.16638		Ga0212129_111767	0.200727	1.15518
Ga0212129_111768	0.00266281	0.0154041		Ga0212129_111768	-0.0712607	-0.350638		Ga0212129_111768	0.0747294	0.429359			Ga0212129_111768	0.248625	1.38526		Ga0212129_111768	0.187297	1.0973		Ga0212129_111768	0.0994781	0.599347			Ga0212129_111768	0.172574	1.0349		Ga0212129_111768	0.181811	1.06442		Ga0212129_111768	0.104646	0.596203			Ga0212129_111768	0.197117	1.13058		Ga0212129_111768	0.0655528	0.348083		Ga0212129_111768	0.233637	1.45338
Ga0212129_111769	-0.0193544	-0.114905		Ga0212129_111769	-0.172166	-0.808385		Ga0212129_111769	-0.250045	-1.39372			Ga0212129_111769	0.0949096	0.591058		Ga0212129_111769	-0.140525	-0.873357		Ga0212129_111769	0.032793	0.200555			Ga0212129_111769	0.142273	0.897477		Ga0212129_111769	0.0409618	0.254255		Ga0212129_111769	-0.0212535	-0.139174			Ga0212129_111769	0.19179	1.15654		Ga0212129_111769	0.0463088	0.306289		Ga0212129_111769	0.0674717	0.421599
Ga0212129_111771	-0.134185	-0.631052		Ga0212129_111771	-0.242638	-1.03171		Ga0212129_111771	-0.0198626	-0.0983388			Ga0212129_111771	0.0439114	0.20113		Ga0212129_111771	-0.238278	-1.24115		Ga0212129_111771	-0.125156	-0.611386			Ga0212129_111771	-0.0874297	-0.446895		Ga0212129_111771	-0.179865	-1.00022		Ga0212129_111771	-0.177432	-0.908217			Ga0212129_111771	-0.0191159	-0.0942553		Ga0212129_111771	-0.0804707	-0.415029		Ga0212129_111771	-0.0394263	-0.242163
Ga0212129_111772	-0.0614028	-0.182951		Ga0212129_111772	-0.279352	-0.603195		Ga0212129_111772	0.294486	1.11588			Ga0212129_111772	0.461612	1.94762		Ga0212129_111772	0.408615	1.76108		Ga0212129_111772	0.20304	0.909923			Ga0212129_111772	0.401698	1.86279		Ga0212129_111772	-0.0299225	-0.106261		Ga0212129_111772	0.0438854	0.189496			Ga0212129_111772	0.308755	1.51076		Ga0212129_111772	0.247492	1.15368		Ga0212129_111772	0.258414	0.992823
Ga0212129_111774	0.0271039	0.198588		Ga0212129_111774	-0.124141	-0.888705		Ga0212129_111774	-0.0553734	-0.402412			Ga0212129_111774	0.121375	0.983757		Ga0212129_111774	0.030757	0.249415		Ga0212129_111774	0.0015425	0.0126808			Ga0212129_111774	0.171491	1.4281		Ga0212129_111774	0.0876136	0.72061		Ga0212129_111774	0.039098	0.319453			Ga0212129_111774	0.156883	1.27899		Ga0212129_111774	0.0307291	0.250836		Ga0212129_111774	0.00719949	0.0585045
Ga0212129_111775	-0.107807	-0.32484		Ga0212129_111775	0.0324103	0.100118		Ga0212129_111775	0.22941	0.788621			Ga0212129_111775	0.024914	0.121708		Ga0212129_111775	-0.0634714	-0.309039		Ga0212129_111775	-0.15115	-0.826501			Ga0212129_111775	-0.110421	-0.48538		Ga0212129_111775	-0.151743	-0.731393		Ga0212129_111775	-0.139348	-0.766776			Ga0212129_111775	0.0564111	0.314307		Ga0212129_111775	-0.21522	-0.882274		Ga0212129_111775	-0.0832856	-0.430018
Ga0212129_111776	-0.0358927	-0.12764		Ga0212129_111776	-0.22288	-0.851881		Ga0212129_111776	-0.271613	-1.33961			Ga0212129_111776	0.183259	1.14483		Ga0212129_111776	0.0935214	0.539237		Ga0212129_111776	-0.120602	-0.731982			Ga0212129_111776	0.122075	0.766487		Ga0212129_111776	-0.00999343	-0.0613854		Ga0212129_111776	0.0565356	0.32159			Ga0212129_111776	0.0022349	0.0127211		Ga0212129_111776	-0.099614	-0.609883		Ga0212129_111776	0.118535	0.693169
Ga0212129_111777	0.473316	1.62143		Ga0212129_111777	0.0582443	0.173893		Ga0212129_111777	-0.0961927	-0.391375			Ga0212129_111777	0.275085	1.19994		Ga0212129_111777	0.23505	0.962839		Ga0212129_111777	0.0688447	0.285613			Ga0212129_111777	0.219003	1.00075		Ga0212129_111777	0.238669	1.16325		Ga0212129_111777	0.222215	0.911285			Ga0212129_111777	0.426827	1.95605		Ga0212129_111777	0.275297	1.27912		Ga0212129_111777	0.111147	0.444616
Ga0212129_11178	0.0821692	0.524775		Ga0212129_11178	0.072578	0.35781		Ga0212129_11178	0.145504	0.763038			Ga0212129_11178	0.02495	0.155129		Ga0212129_11178	0.115288	0.727285		Ga0212129_11178	0.0133742	0.0807282			Ga0212129_11178	-0.0537112	-0.347462		Ga0212129_11178	0.0199097	0.127623		Ga0212129_11178	0.0218628	0.131201			Ga0212129_11178	0.0805646	0.504321		Ga0212129_11178	0.000614531	0.00388671		Ga0212129_11178	-0.0455832	-0.29823
Ga0212129_111783	-0.577702	-1.0862		Ga0212129_111783	-1.29545	-1.80826		Ga0212129_111783	-2.9851	-3.39978			Ga0212129_111783	-1.13061	-2.08893		Ga0212129_111783	-1.16465	-3.19639		Ga0212129_111783	-1.15157	-2.88729			Ga0212129_111783	-1.37759	-3.65768		Ga0212129_111783	-1.05427	-2.88368		Ga0212129_111783	-1.11779	-2.72498			Ga0212129_111783	-0.942868	-2.66954		Ga0212129_111783	-1.38297	-3.61298		Ga0212129_111783	-1.2819	-2.77083
Ga0212129_111784	0.347661	1.64258		Ga0212129_111784	-0.0628404	-0.210167		Ga0212129_111784	0.0337353	0.16429			Ga0212129_111784	0.342141	1.75193		Ga0212129_111784	0.300555	1.55187		Ga0212129_111784	0.316586	1.55447			Ga0212129_111784	0.360416	1.67674		Ga0212129_111784	0.170353	0.830583		Ga0212129_111784	0.256242	1.18891			Ga0212129_111784	0.362371	1.71831		Ga0212129_111784	0.294095	1.46005		Ga0212129_111784	0.248019	1.22751
Ga0212129_111785	0.165099	0.978444		Ga0212129_111785	-0.222827	-1.16289		Ga0212129_111785	0.365845	2.30309			Ga0212129_111785	0.136389	0.884186		Ga0212129_111785	0.0488523	0.313854		Ga0212129_111785	0.0513951	0.342453			Ga0212129_111785	0.115591	0.771362		Ga0212129_111785	0.128914	0.836731		Ga0212129_111785	0.0566785	0.365445			Ga0212129_111785	0.234051	1.5999		Ga0212129_111785	0.0139984	0.0960889		Ga0212129_111785	0.0383519	0.261607
Ga0212129_111786	0.251423	0.787114		Ga0212129_111786	0.118849	0.302457		Ga0212129_111786	-0.45527	-1.48746			Ga0212129_111786	0.35962	1.34462		Ga0212129_111786	0.388307	1.81215		Ga0212129_111786	0.0113763	0.0481611			Ga0212129_111786	0.340384	1.55371		Ga0212129_111786	0.311171	1.4155		Ga0212129_111786	0.0698634	0.246415			Ga0212129_111786	0.387006	1.38951		Ga0212129_111786	0.0554085	0.197011		Ga0212129_111786	0.0673488	0.287863
Ga0212129_111787	0.489239	2.36209		Ga0212129_111787	0.192092	0.883361		Ga0212129_111787	0.266239	1.13137			Ga0212129_111787	0.395418	2.27666		Ga0212129_111787	0.301037	1.63906		Ga0212129_111787	0.155697	0.784561			Ga0212129_111787	0.404667	2.19933		Ga0212129_111787	0.177453	0.90043		Ga0212129_111787	0.207381	1.14187			Ga0212129_111787	0.352429	1.82078		Ga0212129_111787	0.29309	1.59943		Ga0212129_111787	0.206393	1.13627
Ga0212129_111788	0.158429	0.439514		Ga0212129_111788	-0.0807574	-0.205182		Ga0212129_111788	-0.527291	-1.37035			Ga0212129_111788	-0.211082	-0.681931		Ga0212129_111788	-0.198142	-0.665882		Ga0212129_111788	-0.303661	-1.08784			Ga0212129_111788	-0.0599209	-0.211315		Ga0212129_111788	-0.0729129	-0.231629		Ga0212129_111788	0.00841315	0.0285944			Ga0212129_111788	0.111566	0.360068		Ga0212129_111788	0.062045	0.186067		Ga0212129_111788	-0.23742	-0.931141
Ga0212129_11179	-0.188424	-0.455115		Ga0212129_11179	0.0967426	0.171155		Ga0212129_11179	-0.332475	-1.15589			Ga0212129_11179	-0.480067	-1.2129		Ga0212129_11179	-0.22823	-0.649069		Ga0212129_11179	-0.263368	-0.625743			Ga0212129_11179	-0.168219	-0.408691		Ga0212129_11179	-0.352569	-1.02844		Ga0212129_11179	-0.21678	-0.65754			Ga0212129_11179	-0.219014	-0.496189		Ga0212129_11179	-0.197929	-0.547264		Ga0212129_11179	-0.503056	-1.48432
Ga0212129_111792	0.286474	1.51491		Ga0212129_111792	-0.0682093	-0.359803		Ga0212129_111792	0.261864	1.46872			Ga0212129_111792	0.307276	2.18756		Ga0212129_111792	0.322087	2.12573		Ga0212129_111792	0.312289	2.03183			Ga0212129_111792	0.408075	2.72216		Ga0212129_111792	0.241573	1.64739		Ga0212129_111792	0.295381	1.91422			Ga0212129_111792	0.403579	2.49434		Ga0212129_111792	0.328131	2.14334		Ga0212129_111792	0.299828	1.93233
Ga0212129_111793	-0.217492	-1.04668		Ga0212129_111793	-0.14944	-0.49547		Ga0212129_111793	-0.0508875	-0.211317			Ga0212129_111793	-0.0809747	-0.388873		Ga0212129_111793	-0.181597	-0.990859		Ga0212129_111793	-0.103508	-0.609066			Ga0212129_111793	-0.0118508	-0.063021		Ga0212129_111793	-0.114356	-0.541932		Ga0212129_111793	-0.132069	-0.708113			Ga0212129_111793	0.127757	0.745066		Ga0212129_111793	-0.0902089	-0.515921		Ga0212129_111793	-0.0680943	-0.385086
Ga0212129_111794	-0.685881	-1.38495		Ga0212129_111794	-0.890982	-1.72017		Ga0212129_111794	-0.298128	-0.900582			Ga0212129_111794	-0.40388	-1.50127		Ga0212129_111794	-0.59791	-1.87275		Ga0212129_111794	-0.598621	-1.52866			Ga0212129_111794	-0.410347	-1.64424		Ga0212129_111794	-0.526416	-1.55078		Ga0212129_111794	-0.311249	-0.961765			Ga0212129_111794	-0.426131	-1.21562		Ga0212129_111794	-0.491357	-1.53016		Ga0212129_111794	-0.213182	-0.506808
Ga0212129_111795	0.0369865	0.0894665		Ga0212129_111795	-0.93094	-2.1155		Ga0212129_111795	0.21124	0.556274			Ga0212129_111795	-0.0907316	-0.283375		Ga0212129_111795	-0.20737	-0.605864		Ga0212129_111795	-0.511301	-1.53291			Ga0212129_111795	-0.583393	-1.44686		Ga0212129_111795	-0.206632	-0.548546		Ga0212129_111795	-0.261346	-0.578826			Ga0212129_111795	-0.135004	-0.387711		Ga0212129_111795	-0.307892	-0.963147		Ga0212129_111795	-0.328797	-0.931979
Ga0212129_111796	0.223483	1.17341		Ga0212129_111796	0.214645	0.917283		Ga0212129_111796	0.123645	0.563815			Ga0212129_111796	0.224971	1.22435		Ga0212129_111796	0.243222	1.35941		Ga0212129_111796	0.0798385	0.42585			Ga0212129_111796	0.260073	1.49149		Ga0212129_111796	0.183007	1.02461		Ga0212129_111796	0.0202627	0.113396			Ga0212129_111796	0.159561	0.872013		Ga0212129_111796	0.0667328	0.369263		Ga0212129_111796	0.0568474	0.304772
Ga0212129_111797	0.156813	1.00918		Ga0212129_111797	-0.184989	-1.18693		Ga0212129_111797	-0.236704	-1.37171			Ga0212129_111797	0.0996931	0.740256		Ga0212129_111797	0.0177244	0.128537		Ga0212129_111797	-0.0180553	-0.132383			Ga0212129_111797	0.0968816	0.722401		Ga0212129_111797	0.0461642	0.332216		Ga0212129_111797	-0.0344816	-0.25457			Ga0212129_111797	0.133833	0.943896		Ga0212129_111797	-0.105328	-0.767919		Ga0212129_111797	-0.100347	-0.723511
Ga0212129_111798	-0.101679	-0.571087		Ga0212129_111798	0.155269	0.787138		Ga0212129_111798	-0.0879272	-0.525488			Ga0212129_111798	0.0369275	0.271831		Ga0212129_111798	0.00569017	0.0380079		Ga0212129_111798	-0.0625834	-0.44661			Ga0212129_111798	0.00848173	0.0594711		Ga0212129_111798	-0.112369	-0.79442		Ga0212129_111798	-0.0639647	-0.454927			Ga0212129_111798	0.145419	1.02948		Ga0212129_111798	-0.11329	-0.772983		Ga0212129_111798	0.006991	0.0522771
Ga0212129_111799	-0.104659	-0.626435		Ga0212129_111799	-0.197909	-1.02731		Ga0212129_111799	-0.0899898	-0.455461			Ga0212129_111799	0.0364939	0.244349		Ga0212129_111799	-0.0764713	-0.540244		Ga0212129_111799	-0.00791582	-0.050936			Ga0212129_111799	0.0785382	0.548202		Ga0212129_111799	-0.0352678	-0.223954		Ga0212129_111799	0.00855446	0.0606738			Ga0212129_111799	-0.0476177	-0.337368		Ga0212129_111799	-0.126002	-0.866419		Ga0212129_111799	0.00878091	0.0613479
Ga0212129_11180	0.203451	1.49875		Ga0212129_11180	-0.0928182	-0.642781		Ga0212129_11180	-0.0750746	-0.534407			Ga0212129_11180	0.11391	0.918591		Ga0212129_11180	0.136166	1.03998		Ga0212129_11180	0.104834	0.836462			Ga0212129_11180	0.087574	0.695893		Ga0212129_11180	0.0973262	0.766591		Ga0212129_11180	0.0865979	0.681436			Ga0212129_11180	0.0642566	0.483006		Ga0212129_11180	0.0240704	0.187883		Ga0212129_11180	0.0366343	0.289919
Ga0212129_111800	0.0542077	0.315748		Ga0212129_111800	0.0300169	0.141994		Ga0212129_111800	0.153146	0.763961			Ga0212129_111800	0.206996	1.20546		Ga0212129_111800	0.105313	0.601241		Ga0212129_111800	0.184959	1.06712			Ga0212129_111800	0.174954	1.04621		Ga0212129_111800	0.123135	0.698672		Ga0212129_111800	0.123229	0.701416			Ga0212129_111800	0.21692	1.28105		Ga0212129_111800	0.0921885	0.564021		Ga0212129_111800	0.139696	0.900947
Ga0212129_111802	-0.337924	-0.993955		Ga0212129_111802	0.0554289	0.0998544		Ga0212129_111802	-0.0104957	-0.0221978			Ga0212129_111802	0.171002	0.574492		Ga0212129_111802	-0.21264	-0.695262		Ga0212129_111802	-0.17436	-0.559348			Ga0212129_111802	0.14693	0.516621		Ga0212129_111802	-0.271308	-0.846274		Ga0212129_111802	-0.0985027	-0.334935			Ga0212129_111802	0.145688	0.53032		Ga0212129_111802	0.162978	0.574916		Ga0212129_111802	-0.0919067	-0.320716
Ga0212129_111803	0.0843916	0.483003		Ga0212129_111803	0.117388	0.538046		Ga0212129_111803	-0.0344575	-0.151116			Ga0212129_111803	0.120373	0.730869		Ga0212129_111803	0.0137238	0.0806238		Ga0212129_111803	0.048406	0.298649			Ga0212129_111803	0.115932	0.708897		Ga0212129_111803	0.0891283	0.552479		Ga0212129_111803	-0.000461046	-0.00292289			Ga0212129_111803	0.0300146	0.17435		Ga0212129_111803	-0.0513816	-0.317931		Ga0212129_111803	-0.00946258	-0.0559623
Ga0212129_111806	-0.127929	-0.567865		Ga0212129_111806	-0.0377506	-0.146901		Ga0212129_111806	0.532817	2.1628			Ga0212129_111806	0.286721	1.60913		Ga0212129_111806	0.210727	1.21956		Ga0212129_111806	0.258892	1.49462			Ga0212129_111806	0.367996	2.24076		Ga0212129_111806	0.299853	1.5438		Ga0212129_111806	0.288126	1.71342			Ga0212129_111806	0.382935	2.05068		Ga0212129_111806	0.23797	1.38253		Ga0212129_111806	0.364537	2.10408
Ga0212129_111808	-0.0792002	-0.337061		Ga0212129_111808	0.22326	0.774224		Ga0212129_111808	0.17579	0.718413			Ga0212129_111808	0.278307	1.35281		Ga0212129_111808	0.244583	1.18885		Ga0212129_111808	0.111782	0.507543			Ga0212129_111808	0.303652	1.2883		Ga0212129_111808	0.0483492	0.225434		Ga0212129_111808	0.192285	0.853825			Ga0212129_111808	0.25014	1.25596		Ga0212129_111808	0.120975	0.509679		Ga0212129_111808	0.28396	1.37449
Ga0212129_111809	0.0440757	0.139031		Ga0212129_111809	0.195439	0.657853		Ga0212129_111809	0.0587891	0.243912			Ga0212129_111809	0.219835	0.932888		Ga0212129_111809	0.172109	0.669735		Ga0212129_111809	0.390694	1.83136			Ga0212129_111809	0.323693	1.55328		Ga0212129_111809	0.133636	0.564781		Ga0212129_111809	0.190826	0.786681			Ga0212129_111809	0.366796	1.66924		Ga0212129_111809	0.219446	0.977603		Ga0212129_111809	0.215681	0.900816
Ga0212129_11181	0.863033	2.25735		Ga0212129_11181	1.31246	2.31426		Ga0212129_11181	0.818217	2.29871			Ga0212129_11181	1.11161	3.75001		Ga0212129_11181	1.24708	4.24779		Ga0212129_11181	1.37051	4.70175			Ga0212129_11181	0.978572	2.86976		Ga0212129_11181	1.09878	3.62589		Ga0212129_11181	1.05779	3.58992			Ga0212129_11181	1.14833	3.27361		Ga0212129_11181	1.06265	3.55578		Ga0212129_11181	1.06813	3.57123
Ga0212129_111810	-0.207519	-0.619275		Ga0212129_111810	-0.356719	-1.29742		Ga0212129_111810	0.123054	0.285204			Ga0212129_111810	0.0961993	0.443333		Ga0212129_111810	-0.0291354	-0.113717		Ga0212129_111810	-0.110754	-0.331228			Ga0212129_111810	-0.166148	-0.567959		Ga0212129_111810	-0.0720524	-0.259068		Ga0212129_111810	-0.113473	-0.447782			Ga0212129_111810	-0.0167525	-0.0602688		Ga0212129_111810	0.0994065	0.365874		Ga0212129_111810	0.0536354	0.228486
Ga0212129_111811	0.0338698	0.16977		Ga0212129_111811	0.083771	0.332183		Ga0212129_111811	-0.0932925	-0.399539			Ga0212129_111811	-0.00217962	-0.0129069		Ga0212129_111811	-0.0455823	-0.283051		Ga0212129_111811	-0.147879	-0.964333			Ga0212129_111811	-0.0668462	-0.413626		Ga0212129_111811	-0.184631	-1.09734		Ga0212129_111811	-0.0981943	-0.589756			Ga0212129_111811	0.0676493	0.443732		Ga0212129_111811	0.0422247	0.259831		Ga0212129_111811	-0.135592	-0.840709
Ga0212129_111812	-0.0840145	-0.196571		Ga0212129_111812	-0.589961	-0.832843		Ga0212129_111812	-0.367049	-0.565156			Ga0212129_111812	0.0213462	0.051219		Ga0212129_111812	0.129854	0.330735		Ga0212129_111812	0.0850572	0.246642			Ga0212129_111812	-0.0854676	-0.176771		Ga0212129_111812	-0.0578542	-0.176946		Ga0212129_111812	-0.271606	-0.585614			Ga0212129_111812	-0.177781	-0.387713		Ga0212129_111812	-0.0868876	-0.267635		Ga0212129_111812	-0.226554	-0.56716
Ga0212129_111815	-0.255245	-0.898034		Ga0212129_111815	-0.535222	-1.11957		Ga0212129_111815	-0.3915	-0.73834			Ga0212129_111815	-0.770518	-1.97025		Ga0212129_111815	-0.500344	-1.46975		Ga0212129_111815	-0.576086	-1.86814			Ga0212129_111815	-0.613937	-2.2366		Ga0212129_111815	-0.710585	-1.71578		Ga0212129_111815	-0.709626	-2.30696			Ga0212129_111815	-0.451693	-1.37433		Ga0212129_111815	-0.595673	-2.03491		Ga0212129_111815	-0.39551	-1.40684
Ga0212129_111817	-0.616346	-0.90583		Ga0212129_111817	-1.46644	-2.18058		Ga0212129_111817	-0.065813	-0.092837			Ga0212129_111817	-0.448931	-0.812059		Ga0212129_111817	-0.541853	-0.95192		Ga0212129_111817	-0.661933	-1.2857			Ga0212129_111817	-0.871123	-1.91176		Ga0212129_111817	-0.504796	-1.219		Ga0212129_111817	-0.499993	-1.27826			Ga0212129_111817	-0.482213	-0.961178		Ga0212129_111817	-0.523934	-1.46972		Ga0212129_111817	-1.00815	-1.57528
Ga0212129_111818	0.243976	0.734072		Ga0212129_111818	-0.318306	-0.767076		Ga0212129_111818	-0.377312	-1.23081			Ga0212129_111818	0.471972	1.97002		Ga0212129_111818	0.123038	0.538772		Ga0212129_111818	0.101431	0.404484			Ga0212129_111818	0.0718865	0.320998		Ga0212129_111818	0.075451	0.315189		Ga0212129_111818	-0.114361	-0.509035			Ga0212129_111818	0.144164	0.652148		Ga0212129_111818	0.0171263	0.0750103		Ga0212129_111818	0.0405289	0.177655
Ga0212129_111819	-0.594233	-1.63279		Ga0212129_111819	-1.56483	-2.65851		Ga0212129_111819	-0.45594	-1.07279			Ga0212129_111819	-0.555672	-2.12663		Ga0212129_111819	-0.686272	-1.91972		Ga0212129_111819	-0.416368	-1.32568			Ga0212129_111819	-0.36655	-1.24255		Ga0212129_111819	-0.292405	-1.00266		Ga0212129_111819	-0.593603	-2.46242			Ga0212129_111819	-0.355741	-1.0505		Ga0212129_111819	-0.473437	-1.50899		Ga0212129_111819	-0.37921	-1.17211
Ga0212129_11182	0.0830539	0.691737		Ga0212129_11182	0.0205373	0.163683		Ga0212129_11182	0.0354516	0.290081			Ga0212129_11182	0.155146	1.37188		Ga0212129_11182	0.133653	1.16418		Ga0212129_11182	0.129626	1.11659			Ga0212129_11182	0.065377	0.571514		Ga0212129_11182	0.12101	1.05893		Ga0212129_11182	0.067004	0.586301			Ga0212129_11182	0.134784	1.15691		Ga0212129_11182	0.0304459	0.264988		Ga0212129_11182	0.0122791	0.106467
Ga0212129_111820	-0.643795	-2.02179		Ga0212129_111820	-0.725912	-2.82601		Ga0212129_111820	-0.987442	-3.36149			Ga0212129_111820	-0.463267	-1.71182		Ga0212129_111820	-0.392722	-1.5059		Ga0212129_111820	-0.436868	-1.84163			Ga0212129_111820	-0.412068	-1.8016		Ga0212129_111820	-0.364165	-1.74258		Ga0212129_111820	-0.485868	-2.18483			Ga0212129_111820	-0.328711	-1.34906		Ga0212129_111820	-0.389521	-1.54026		Ga0212129_111820	-0.407523	-1.71506
Ga0212129_111821	-1.25063	-2.58991		Ga0212129_111821	-0.431427	-0.872238		Ga0212129_111821	-1.89784	-2.80907			Ga0212129_111821	-1.26394	-3.53497		Ga0212129_111821	-1.38232	-3.39814		Ga0212129_111821	-1.40022	-3.95874			Ga0212129_111821	-1.24329	-2.83472		Ga0212129_111821	-1.45277	-2.41302		Ga0212129_111821	-1.5258	-3.56732			Ga0212129_111821	-1.38129	-2.40204		Ga0212129_111821	-1.23643	-2.37369		Ga0212129_111821	-1.27491	-2.68668
Ga0212129_111826	0.0056327	0.0277043		Ga0212129_111826	0.326749	1.49635		Ga0212129_111826	-0.011592	-0.0620246			Ga0212129_111826	0.267738	1.61424		Ga0212129_111826	0.249364	1.465		Ga0212129_111826	0.0424094	0.247115			Ga0212129_111826	0.197066	1.1418		Ga0212129_111826	0.206342	1.15923		Ga0212129_111826	0.240703	1.49251			Ga0212129_111826	0.185282	1.07737		Ga0212129_111826	0.147901	0.894381		Ga0212129_111826	0.00536934	0.035474
Ga0212129_111827	0.0956732	0.673323		Ga0212129_111827	-0.0812901	-0.567406		Ga0212129_111827	0.179508	1.19293			Ga0212129_111827	0.131945	0.993297		Ga0212129_111827	0.162218	1.16241		Ga0212129_111827	0.105222	0.756128			Ga0212129_111827	0.144076	1.06184		Ga0212129_111827	0.143976	1.06095		Ga0212129_111827	0.100753	0.749804			Ga0212129_111827	0.172607	1.24233		Ga0212129_111827	0.0427609	0.31283		Ga0212129_111827	0.123521	0.924412
Ga0212129_111829	0.450839	1.45623		Ga0212129_111829	-1.06476	-1.81801		Ga0212129_111829	0.13388	0.335246			Ga0212129_111829	0.193476	0.58184		Ga0212129_111829	0.230683	0.85489		Ga0212129_111829	0.0385886	0.120655			Ga0212129_111829	0.176292	0.72088		Ga0212129_111829	0.235659	0.802284		Ga0212129_111829	0.0895471	0.332789			Ga0212129_111829	0.101841	0.355692		Ga0212129_111829	0.107259	0.372105		Ga0212129_111829	-0.158814	-0.406068
Ga0212129_11183	0.0193393	0.106595		Ga0212129_11183	-0.178472	-0.935985		Ga0212129_11183	0.132667	0.683794			Ga0212129_11183	0.0418984	0.253572		Ga0212129_11183	-0.0385573	-0.219801		Ga0212129_11183	-0.0051611	-0.030942			Ga0212129_11183	-0.0921015	-0.536393		Ga0212129_11183	-0.123663	-0.693594		Ga0212129_11183	-0.126247	-0.774256			Ga0212129_11183	-0.0960676	-0.545214		Ga0212129_11183	-0.0886885	-0.521012		Ga0212129_11183	-0.0787271	-0.479125
Ga0212129_111830	0.438524	2.07648		Ga0212129_111830	-0.104877	-0.372831		Ga0212129_111830	0.0114825	0.0540713			Ga0212129_111830	-0.0365675	-0.190746		Ga0212129_111830	0.0734478	0.403168		Ga0212129_111830	0.0110726	0.0568952			Ga0212129_111830	-0.0351964	-0.186992		Ga0212129_111830	0.0920298	0.457718		Ga0212129_111830	0.0900705	0.458305			Ga0212129_111830	0.0857504	0.456353		Ga0212129_111830	0.0525777	0.255163		Ga0212129_111830	0.122758	0.631396
Ga0212129_111831	-0.0429399	-0.197099		Ga0212129_111831	0.354008	1.75913		Ga0212129_111831	0.227066	1.02142			Ga0212129_111831	-0.0380889	-0.221979		Ga0212129_111831	0.044451	0.234637		Ga0212129_111831	0.0323476	0.177943			Ga0212129_111831	-0.113284	-0.660494		Ga0212129_111831	-0.0571281	-0.290206		Ga0212129_111831	-0.0341649	-0.190892			Ga0212129_111831	-0.0731236	-0.378033		Ga0212129_111831	-0.0631721	-0.344201		Ga0212129_111831	0.13642	0.836999
Ga0212129_111832	0.346236	0.960588		Ga0212129_111832	-0.592512	-2.06397		Ga0212129_111832	0.11924	0.443621			Ga0212129_111832	-0.0414791	-0.141504		Ga0212129_111832	0.00369664	0.0147033		Ga0212129_111832	-0.0153266	-0.0608089			Ga0212129_111832	0.0707635	0.328905		Ga0212129_111832	-0.0683004	-0.282713		Ga0212129_111832	-0.180339	-0.81958			Ga0212129_111832	0.178621	0.700413		Ga0212129_111832	-0.0146567	-0.0561664		Ga0212129_111832	-0.149759	-0.667047
Ga0212129_111833	-0.447158	-1.34853		Ga0212129_111833	-0.429715	-0.819187		Ga0212129_111833	-0.0550026	-0.12465			Ga0212129_111833	-0.0901853	-0.287169		Ga0212129_111833	-0.00630813	-0.0184867		Ga0212129_111833	0.041694	0.151436			Ga0212129_111833	0.246127	0.787641		Ga0212129_111833	-0.138066	-0.506056		Ga0212129_111833	-0.198301	-0.600144			Ga0212129_111833	0.192107	0.578089		Ga0212129_111833	0.0192898	0.0589902		Ga0212129_111833	0.0357639	0.13581
Ga0212129_111834	-0.029126	-0.151496		Ga0212129_111834	0.0522521	0.257486		Ga0212129_111834	-0.167365	-0.819861			Ga0212129_111834	-0.00293128	-0.0190705		Ga0212129_111834	-0.0488621	-0.290234		Ga0212129_111834	-0.104353	-0.613456			Ga0212129_111834	-0.151276	-1.03261		Ga0212129_111834	-0.127983	-0.769405		Ga0212129_111834	-0.111272	-0.6579			Ga0212129_111834	0.0433817	0.265151		Ga0212129_111834	-0.0517941	-0.317566		Ga0212129_111834	-0.227841	-1.46471
Ga0212129_111839	0.0636424	0.235055		Ga0212129_111839	0.178158	0.584987		Ga0212129_111839	-0.00961773	-0.046409			Ga0212129_111839	-0.0375079	-0.197438		Ga0212129_111839	0.00867155	0.0346151		Ga0212129_111839	-0.140642	-0.601075			Ga0212129_111839	0.00585061	0.0332841		Ga0212129_111839	0.0161881	0.0764588		Ga0212129_111839	0.064223	0.270698			Ga0212129_111839	0.0964071	0.418627		Ga0212129_111839	-0.0933005	-0.443057		Ga0212129_111839	-0.110359	-0.565291
Ga0212129_11184	0.199844	0.863111		Ga0212129_11184	-0.266286	-0.948393		Ga0212129_11184	0.162667	0.704535			Ga0212129_11184	0.321615	1.70419		Ga0212129_11184	0.0805596	0.391624		Ga0212129_11184	0.237527	1.09963			Ga0212129_11184	0.183464	0.912181		Ga0212129_11184	0.186547	0.931839		Ga0212129_11184	0.131504	0.632877			Ga0212129_11184	0.371213	1.70948		Ga0212129_11184	0.168179	0.872234		Ga0212129_11184	0.176284	0.830577
Ga0212129_111840	0.142805	0.718474		Ga0212129_111840	0.604935	3.00867		Ga0212129_111840	0.34914	1.70434			Ga0212129_111840	0.27929	1.42929		Ga0212129_111840	0.249731	1.27952		Ga0212129_111840	0.190165	0.91499			Ga0212129_111840	0.14264	0.720578		Ga0212129_111840	0.241262	1.22734		Ga0212129_111840	0.166093	0.878071			Ga0212129_111840	0.209561	1.17142		Ga0212129_111840	0.108327	0.553924		Ga0212129_111840	0.269039	1.44365
Ga0212129_111841	0.0954728	0.296682		Ga0212129_111841	-0.768456	-1.47606		Ga0212129_111841	-0.724386	-0.932465			Ga0212129_111841	-0.165557	-0.414041		Ga0212129_111841	-0.335167	-0.786088		Ga0212129_111841	-0.502339	-0.978542			Ga0212129_111841	-0.380945	-1.15662		Ga0212129_111841	-0.471477	-0.8297		Ga0212129_111841	-0.173102	-0.390713			Ga0212129_111841	-0.573462	-0.98472		Ga0212129_111841	-0.454817	-0.833666		Ga0212129_111841	-0.670374	-1.64974
Ga0212129_111842	0.139117	0.758951		Ga0212129_111842	0.111171	0.523184		Ga0212129_111842	-0.117466	-0.498001			Ga0212129_111842	-0.0764581	-0.515545		Ga0212129_111842	-0.0124805	-0.0738951		Ga0212129_111842	-0.13149	-0.755147			Ga0212129_111842	-0.0226185	-0.140491		Ga0212129_111842	-0.0570977	-0.34709		Ga0212129_111842	-0.035186	-0.21862			Ga0212129_111842	-0.096764	-0.582005		Ga0212129_111842	0.00813045	0.0525279		Ga0212129_111842	-0.0190977	-0.122992
Ga0212129_111843	0.506798	1.3676		Ga0212129_111843	-0.38687	-0.668061		Ga0212129_111843	0.0310176	0.0705393			Ga0212129_111843	0.0251009	0.0874936		Ga0212129_111843	0.0436301	0.132115		Ga0212129_111843	0.177528	0.559456			Ga0212129_111843	0.237804	0.634439		Ga0212129_111843	0.113507	0.333087		Ga0212129_111843	-0.0072969	-0.0236051			Ga0212129_111843	-0.00771986	-0.0247848		Ga0212129_111843	0.202366	0.677601		Ga0212129_111843	0.127505	0.363919
Ga0212129_111844	0.105793	0.162908		Ga0212129_111844	0.147971	0.211277		Ga0212129_111844	-0.533559	-1.17209			Ga0212129_111844	-0.0441326	-0.108635		Ga0212129_111844	-0.127588	-0.198045		Ga0212129_111844	0.0910792	0.187545			Ga0212129_111844	0.198799	0.40505		Ga0212129_111844	-0.0163751	-0.0369532		Ga0212129_111844	0.0252658	0.0584022			Ga0212129_111844	-0.196326	-0.521154		Ga0212129_111844	0.135475	0.270778		Ga0212129_111844	0.0876193	0.244493
Ga0212129_111847	0.142573	0.272764		Ga0212129_111847	-0.892393	-1.20944		Ga0212129_111847	-0.248987	-0.339513			Ga0212129_111847	-0.439302	-0.940582		Ga0212129_111847	-0.216776	-0.689075		Ga0212129_111847	-0.255968	-0.738801			Ga0212129_111847	-0.278421	-0.877211		Ga0212129_111847	-0.454305	-1.36557		Ga0212129_111847	-0.323535	-0.649043			Ga0212129_111847	-0.315579	-0.86638		Ga0212129_111847	-0.445703	-1.08344		Ga0212129_111847	-0.332764	-1.01699
Ga0212129_111848	-0.313482	-1.32107		Ga0212129_111848	-0.384767	-1.28778		Ga0212129_111848	0.0117387	0.0433971			Ga0212129_111848	0.0164402	0.0731544		Ga0212129_111848	-0.138199	-0.630443		Ga0212129_111848	0.0138174	0.0730902			Ga0212129_111848	-0.0876845	-0.413261		Ga0212129_111848	0.00954226	0.0446251		Ga0212129_111848	-0.145684	-0.630425			Ga0212129_111848	-0.0162751	-0.0870722		Ga0212129_111848	0.0833828	0.372027		Ga0212129_111848	-0.0673779	-0.291554
Ga0212129_11185	-0.43879	-1.50437		Ga0212129_11185	-0.0953529	-0.269361		Ga0212129_11185	-0.00307552	-0.00965946			Ga0212129_11185	0.0176082	0.0521707		Ga0212129_11185	0.0946365	0.341763		Ga0212129_11185	0.088942	0.385005			Ga0212129_11185	0.0120593	0.0472842		Ga0212129_11185	0.0241953	0.084609		Ga0212129_11185	-0.230841	-0.684337			Ga0212129_11185	0.102585	0.373902		Ga0212129_11185	0.158065	0.634074		Ga0212129_11185	0.0753419	0.308121
Ga0212129_111850	-0.191203	-0.608255		Ga0212129_111850	-0.555988	-1.6993		Ga0212129_111850	0.31751	1.22791			Ga0212129_111850	0.285413	1.34258		Ga0212129_111850	0.328366	1.76154		Ga0212129_111850	0.221639	1.06529			Ga0212129_111850	0.255648	1.24729		Ga0212129_111850	0.335473	1.60215		Ga0212129_111850	0.386648	1.99426			Ga0212129_111850	0.378552	2.16637		Ga0212129_111850	0.434846	2.323		Ga0212129_111850	0.0950429	0.517045
Ga0212129_111851	0.0109816	0.0581914		Ga0212129_111851	0.267612	1.51184		Ga0212129_111851	-0.121662	-0.661215			Ga0212129_111851	-0.0768544	-0.543385		Ga0212129_111851	-0.107457	-0.669748		Ga0212129_111851	-0.139981	-0.907772			Ga0212129_111851	-0.0920708	-0.602586		Ga0212129_111851	0.058829	0.413435		Ga0212129_111851	-0.0431148	-0.29192			Ga0212129_111851	-0.101661	-0.62554		Ga0212129_111851	-0.0224179	-0.153427		Ga0212129_111851	-0.143775	-0.981733
Ga0212129_111852	-0.0290738	-0.186336		Ga0212129_111852	-0.0708389	-0.404375		Ga0212129_111852	0.0517886	0.315383			Ga0212129_111852	-0.0283036	-0.199001		Ga0212129_111852	0.0887706	0.648769		Ga0212129_111852	0.0414838	0.312835			Ga0212129_111852	-0.0170111	-0.125885		Ga0212129_111852	-0.0404485	-0.296193		Ga0212129_111852	-0.0101667	-0.0736248			Ga0212129_111852	-0.0590639	-0.421855		Ga0212129_111852	0.0307902	0.224703		Ga0212129_111852	0.10113	0.736056
Ga0212129_111853	-0.0746364	-0.200797		Ga0212129_111853	0.236235	0.726065		Ga0212129_111853	-0.0175418	-0.0600336			Ga0212129_111853	0.0913283	0.408011		Ga0212129_111853	0.152187	0.758091		Ga0212129_111853	0.130658	0.506808			Ga0212129_111853	0.0821729	0.352757		Ga0212129_111853	0.257801	1.14836		Ga0212129_111853	-0.00629681	-0.0317428			Ga0212129_111853	0.118448	0.545358		Ga0212129_111853	0.181175	0.905942		Ga0212129_111853	0.164569	0.828941
Ga0212129_111855	-0.198828	-1.04586		Ga0212129_111855	-0.0223226	-0.104133		Ga0212129_111855	-0.157035	-0.756299			Ga0212129_111855	-0.136293	-0.7992		Ga0212129_111855	0.0587005	0.3624		Ga0212129_111855	-0.00514667	-0.030964			Ga0212129_111855	-0.0721623	-0.400381		Ga0212129_111855	-0.0405116	-0.245313		Ga0212129_111855	-0.12037	-0.676343			Ga0212129_111855	-0.124223	-0.757522		Ga0212129_111855	-0.105259	-0.636831		Ga0212129_111855	0.0121751	0.0736458
Ga0212129_111856	-0.132075	-0.603287		Ga0212129_111856	-0.0830333	-0.382672		Ga0212129_111856	-0.126789	-0.660736			Ga0212129_111856	-0.197878	-1.14492		Ga0212129_111856	-0.00354174	-0.0182301		Ga0212129_111856	-0.0170049	-0.100296			Ga0212129_111856	-0.149844	-0.893128		Ga0212129_111856	-0.0954382	-0.54398		Ga0212129_111856	-0.0352073	-0.213615			Ga0212129_111856	-0.101552	-0.558852		Ga0212129_111856	0.0269781	0.163021		Ga0212129_111856	-0.0612725	-0.353225
Ga0212129_111857	0.63212	1.8965		Ga0212129_111857	0.790108	2.30587		Ga0212129_111857	0.591189	1.39419			Ga0212129_111857	0.522228	1.79599		Ga0212129_111857	0.672237	2.35675		Ga0212129_111857	0.633317	2.22123			Ga0212129_111857	0.568623	1.97281		Ga0212129_111857	0.855573	2.97915		Ga0212129_111857	0.69739	2.45465			Ga0212129_111857	0.606248	2.12361		Ga0212129_111857	0.505714	1.7272		Ga0212129_111857	0.756784	2.62142
Ga0212129_111858	-0.155633	-0.95639		Ga0212129_111858	0.175578	1.08719		Ga0212129_111858	-0.0514693	-0.304457			Ga0212129_111858	-0.0882759	-0.616052		Ga0212129_111858	0.00135783	0.00936559		Ga0212129_111858	-0.0350117	-0.24565			Ga0212129_111858	-0.0714904	-0.524934		Ga0212129_111858	-0.0193097	-0.125385		Ga0212129_111858	0.0394465	0.282366			Ga0212129_111858	-0.072722	-0.505563		Ga0212129_111858	0.0111561	0.0763456		Ga0212129_111858	0.0480162	0.337239
Ga0212129_111859	0.655091	2.11549		Ga0212129_111859	0.427958	1.3876		Ga0212129_111859	0.935225	2.53653			Ga0212129_111859	0.490401	1.79124		Ga0212129_111859	0.645158	2.58634		Ga0212129_111859	0.718894	2.92044			Ga0212129_111859	0.466295	1.61408		Ga0212129_111859	0.655255	2.51363		Ga0212129_111859	0.606178	2.02593			Ga0212129_111859	0.561572	2.34668		Ga0212129_111859	0.565859	2.38222		Ga0212129_111859	0.596863	1.92092
Ga0212129_11186	-0.509374	-1.85704		Ga0212129_11186	-0.105436	-0.367815		Ga0212129_11186	-0.723042	-1.93062			Ga0212129_11186	0.0380465	0.203906		Ga0212129_11186	-0.0558026	-0.291567		Ga0212129_11186	0.0130991	0.0616484			Ga0212129_11186	0.0234924	0.12362		Ga0212129_11186	-0.0240283	-0.122081		Ga0212129_11186	-0.0492327	-0.265392			Ga0212129_11186	-0.00628331	-0.0330204		Ga0212129_11186	-0.176796	-0.900689		Ga0212129_11186	-0.0401814	-0.198235
Ga0212129_111860	-0.00246637	-0.0154244		Ga0212129_111860	-0.0262323	-0.166806		Ga0212129_111860	0.087356	0.59854			Ga0212129_111860	0.0352906	0.277812		Ga0212129_111860	0.0772301	0.56939		Ga0212129_111860	0.0380553	0.287581			Ga0212129_111860	-0.0459524	-0.353798		Ga0212129_111860	0.0675261	0.500666		Ga0212129_111860	0.0347531	0.262152			Ga0212129_111860	-0.0162751	-0.118911		Ga0212129_111860	0.0617706	0.456291		Ga0212129_111860	0.0426833	0.330012
Ga0212129_111861	0.232644	0.604674		Ga0212129_111861	-0.13193	-0.306689		Ga0212129_111861	0.411884	0.894743			Ga0212129_111861	-0.000880364	-0.00281687		Ga0212129_111861	-0.0714303	-0.211901		Ga0212129_111861	0.103004	0.313986			Ga0212129_111861	0.0230737	0.0714032		Ga0212129_111861	-0.00247154	-0.00918232		Ga0212129_111861	-0.0198646	-0.081773			Ga0212129_111861	-0.0792347	-0.233814		Ga0212129_111861	-0.181995	-0.591244		Ga0212129_111861	0.159954	0.613341
Ga0212129_111862	-0.259954	-1.68799		Ga0212129_111862	-0.0671515	-0.364415		Ga0212129_111862	-0.145696	-0.934603			Ga0212129_111862	-0.150064	-1.08028		Ga0212129_111862	-0.103171	-0.718149		Ga0212129_111862	-0.174492	-1.27765			Ga0212129_111862	-0.190821	-1.3565		Ga0212129_111862	-0.121723	-0.866736		Ga0212129_111862	-0.0799016	-0.594509			Ga0212129_111862	-0.120049	-0.869788		Ga0212129_111862	-0.144988	-0.984336		Ga0212129_111862	-0.11961	-0.840216
Ga0212129_111864	0.0152581	0.0696141		Ga0212129_111864	0.183526	0.881085		Ga0212129_111864	0.167756	0.754083			Ga0212129_111864	-0.0428009	-0.211457		Ga0212129_111864	0.121517	0.627518		Ga0212129_111864	0.165545	0.846346			Ga0212129_111864	0.00962428	0.0485834		Ga0212129_111864	0.0698622	0.328808		Ga0212129_111864	-0.0189262	-0.101893			Ga0212129_111864	-0.0378811	-0.212841		Ga0212129_111864	0.072755	0.393442		Ga0212129_111864	0.0922165	0.46153
Ga0212129_111865	0.718115	1.84657		Ga0212129_111865	0.208782	0.52609		Ga0212129_111865	0.468613	1.44709			Ga0212129_111865	0.0560039	0.158394		Ga0212129_111865	0.323815	0.846137		Ga0212129_111865	0.504796	1.37872			Ga0212129_111865	0.178414	0.517129		Ga0212129_111865	0.631345	2.14142		Ga0212129_111865	0.470293	1.52527			Ga0212129_111865	0.175231	0.407582		Ga0212129_111865	0.488266	1.51283		Ga0212129_111865	0.445167	1.18465
Ga0212129_111866	-0.188106	-0.392829		Ga0212129_111866	-0.244509	-0.517948		Ga0212129_111866	-0.0440156	-0.0996023			Ga0212129_111866	-0.293906	-0.67047		Ga0212129_111866	-0.0403326	-0.094034		Ga0212129_111866	-0.339049	-1.07801			Ga0212129_111866	-0.55486	-1.69249		Ga0212129_111866	-0.211212	-0.617539		Ga0212129_111866	-0.383418	-1.34623			Ga0212129_111866	-0.0683567	-0.263595		Ga0212129_111866	-0.0415987	-0.104752		Ga0212129_111866	-0.387801	-1.04912
Ga0212129_11187	0.197415	1.05875		Ga0212129_11187	-0.344245	-1.78912		Ga0212129_11187	0.0364203	0.193058			Ga0212129_11187	0.182325	1.26722		Ga0212129_11187	0.228411	1.62106		Ga0212129_11187	0.112212	0.754963			Ga0212129_11187	0.152222	1.06657		Ga0212129_11187	0.133772	0.883199		Ga0212129_11187	0.00508541	0.0346612			Ga0212129_11187	0.0793668	0.525088		Ga0212129_11187	0.0382084	0.28024		Ga0212129_11187	0.133483	0.926329
Ga0212129_111871	-0.186091	-0.632269		Ga0212129_111871	-0.703993	-2.27339		Ga0212129_111871	0.00368365	0.0123649			Ga0212129_111871	-0.250404	-1.18366		Ga0212129_111871	-0.274041	-1.28223		Ga0212129_111871	-0.245798	-1.11282			Ga0212129_111871	-0.116946	-0.571282		Ga0212129_111871	-0.396009	-1.83041		Ga0212129_111871	-0.153549	-0.839782			Ga0212129_111871	-0.251995	-1.06936		Ga0212129_111871	-0.249081	-1.10484		Ga0212129_111871	-0.177972	-0.759279
Ga0212129_11188	0.162993	1.00279		Ga0212129_11188	-0.00153223	-0.00750169		Ga0212129_11188	-0.106168	-0.626539			Ga0212129_11188	0.118263	0.817361		Ga0212129_11188	0.0595981	0.431817		Ga0212129_11188	0.119652	0.790806			Ga0212129_11188	0.0742724	0.535617		Ga0212129_11188	0.107082	0.720893		Ga0212129_11188	0.0777586	0.515194			Ga0212129_11188	0.11122	0.766695		Ga0212129_11188	0.045266	0.299414		Ga0212129_11188	0.0182257	0.125245
Ga0212129_111880	-0.159194	-0.478276		Ga0212129_111880	-0.0246483	-0.0970351		Ga0212129_111880	-0.134243	-0.473548			Ga0212129_111880	-0.289963	-1.19774		Ga0212129_111880	-0.0751327	-0.262738		Ga0212129_111880	-0.265474	-1.01651			Ga0212129_111880	-0.200589	-0.787935		Ga0212129_111880	-0.218932	-0.705156		Ga0212129_111880	-0.124025	-0.462128			Ga0212129_111880	-0.389805	-1.31333		Ga0212129_111880	-0.224181	-0.845153		Ga0212129_111880	-0.099243	-0.41598
Ga0212129_111882	-0.775219	-2.21083		Ga0212129_111882	-0.344806	-1.09203		Ga0212129_111882	-0.752189	-1.99957			Ga0212129_111882	-1.00816	-2.90076		Ga0212129_111882	-0.934159	-2.56545		Ga0212129_111882	-0.882139	-2.66991			Ga0212129_111882	-1.0762	-3.33581		Ga0212129_111882	-0.964557	-2.47922		Ga0212129_111882	-0.846046	-2.3391			Ga0212129_111882	-1.01752	-2.66485		Ga0212129_111882	-0.904637	-2.75492		Ga0212129_111882	-0.778207	-1.89905
Ga0212129_111883	-0.267105	-1.34763		Ga0212129_111883	0.302202	1.13007		Ga0212129_111883	0.143553	0.521256			Ga0212129_111883	-0.283518	-1.46363		Ga0212129_111883	-0.0662526	-0.357047		Ga0212129_111883	-0.126328	-0.640145			Ga0212129_111883	-0.23773	-1.26613		Ga0212129_111883	-0.0794938	-0.401384		Ga0212129_111883	-0.152454	-0.754589			Ga0212129_111883	-0.131755	-0.621418		Ga0212129_111883	-0.10672	-0.521957		Ga0212129_111883	-0.161776	-0.789906
Ga0212129_111885	-0.262966	-1.37163		Ga0212129_111885	0.0215666	0.0779465		Ga0212129_111885	0.154441	0.818232			Ga0212129_111885	-0.0993965	-0.52306		Ga0212129_111885	0.00962103	0.0569893		Ga0212129_111885	0.146303	0.852691			Ga0212129_111885	-0.0203952	-0.114093		Ga0212129_111885	0.0729349	0.423647		Ga0212129_111885	0.145106	0.829079			Ga0212129_111885	-0.0350357	-0.193412		Ga0212129_111885	0.0137904	0.077073		Ga0212129_111885	0.0388471	0.218479
Ga0212129_111887	0.191211	0.778612		Ga0212129_111887	0.24754	0.773448		Ga0212129_111887	-0.0434886	-0.167577			Ga0212129_111887	-0.207537	-0.798117		Ga0212129_111887	-0.0855911	-0.406641		Ga0212129_111887	-0.155421	-0.5764			Ga0212129_111887	-0.0662486	-0.299859		Ga0212129_111887	-0.0603269	-0.230806		Ga0212129_111887	-0.0470243	-0.188186			Ga0212129_111887	-0.0326656	-0.12685		Ga0212129_111887	-0.100061	-0.439406		Ga0212129_111887	-0.183143	-0.731673
Ga0212129_111889	-0.107347	-0.313333		Ga0212129_111889	-0.447914	-1.2024		Ga0212129_111889	0.167126	0.484424			Ga0212129_111889	0.174538	0.586543		Ga0212129_111889	0.333524	0.970533		Ga0212129_111889	-0.0108122	-0.027353			Ga0212129_111889	-0.0138689	-0.0406838		Ga0212129_111889	-0.206007	-0.618624		Ga0212129_111889	0.105194	0.32044			Ga0212129_111889	0.0955164	0.232731		Ga0212129_111889	-0.0772849	-0.233811		Ga0212129_111889	0.225226	0.673099
Ga0212129_11189	0.0681696	0.425447		Ga0212129_11189	-0.197994	-1.15229		Ga0212129_11189	-0.0102007	-0.0561726			Ga0212129_11189	-0.0970637	-0.671584		Ga0212129_11189	-0.0919583	-0.636356		Ga0212129_11189	-0.0117214	-0.081163			Ga0212129_11189	-0.129167	-0.873997		Ga0212129_11189	-0.0170556	-0.115333		Ga0212129_11189	-0.072258	-0.488767			Ga0212129_11189	-0.0352951	-0.243143		Ga0212129_11189	-0.123829	-0.867714		Ga0212129_11189	-0.0998508	-0.692962
Ga0212129_111890	-0.0799873	-0.580218		Ga0212129_111890	0.142533	1.01586		Ga0212129_111890	0.117593	0.83237			Ga0212129_111890	-0.140129	-1.11544		Ga0212129_111890	0.0066985	0.0521419		Ga0212129_111890	-0.0345391	-0.269319			Ga0212129_111890	-0.0565832	-0.441143		Ga0212129_111890	-0.0202606	-0.156378		Ga0212129_111890	-0.0321729	-0.24744			Ga0212129_111890	-0.017389	-0.136617		Ga0212129_111890	0.0325718	0.249811		Ga0212129_111890	-0.00985078	-0.0768891
Ga0212129_111897	-0.29024	-1.12637		Ga0212129_111897	-0.159203	-0.66458		Ga0212129_111897	0.0819769	0.382621			Ga0212129_111897	0.0492473	0.280519		Ga0212129_111897	0.142944	0.800148		Ga0212129_111897	0.106528	0.635227			Ga0212129_111897	0.0490382	0.290945		Ga0212129_111897	0.152546	0.79741		Ga0212129_111897	0.190662	1.05872			Ga0212129_111897	0.204355	1.1186		Ga0212129_111897	0.143507	0.877812		Ga0212129_111897	0.125552	0.756267
Ga0212129_111898	-0.0951121	-0.318458		Ga0212129_111898	-0.0978793	-0.39644		Ga0212129_111898	0.250827	0.957186			Ga0212129_111898	0.10945	0.545732		Ga0212129_111898	0.0670755	0.305828		Ga0212129_111898	0.152026	0.648705			Ga0212129_111898	-0.0486651	-0.238183		Ga0212129_111898	0.275891	1.26701		Ga0212129_111898	0.136875	0.6922			Ga0212129_111898	-0.0549866	-0.251193		Ga0212129_111898	0.0766436	0.332794		Ga0212129_111898	0.136579	0.590414
Ga0212129_111899	-0.112033	-0.451103		Ga0212129_111899	-0.230259	-0.767081		Ga0212129_111899	-0.00625198	-0.028724			Ga0212129_111899	-0.0682807	-0.31242		Ga0212129_111899	-0.0238015	-0.112273		Ga0212129_111899	0.0472928	0.19166			Ga0212129_111899	-0.18003	-0.930266		Ga0212129_111899	-0.114196	-0.500336		Ga0212129_111899	-0.158707	-0.752229			Ga0212129_111899	-0.177354	-0.763064		Ga0212129_111899	-0.0419662	-0.228128		Ga0212129_111899	-0.0938641	-0.586903
Ga0212129_11190	0.0825966	0.529831		Ga0212129_11190	0.0718768	0.477732		Ga0212129_11190	0.106338	0.670606			Ga0212129_11190	0.107242	0.776531		Ga0212129_11190	0.109657	0.791751		Ga0212129_11190	0.0684382	0.494414			Ga0212129_11190	0.105213	0.747479		Ga0212129_11190	0.0874216	0.606268		Ga0212129_11190	0.065886	0.473724			Ga0212129_11190	0.205944	1.46465		Ga0212129_11190	0.0523223	0.387161		Ga0212129_11190	0.00821509	0.0610811
Ga0212129_111900	0.0634931	0.335397		Ga0212129_111900	0.0623673	0.263098		Ga0212129_111900	0.0408997	0.221994			Ga0212129_111900	-0.046459	-0.23734		Ga0212129_111900	0.155938	0.922675		Ga0212129_111900	0.00864596	0.0497684			Ga0212129_111900	-0.0295547	-0.157486		Ga0212129_111900	-0.0367599	-0.193784		Ga0212129_111900	0.00108395	0.00559255			Ga0212129_111900	0.106846	0.568656		Ga0212129_111900	0.138397	0.766981		Ga0212129_111900	0.0703463	0.394153
Ga0212129_111902	-0.497324	-0.746244		Ga0212129_111902	0.83511	1.63957		Ga0212129_111902	-0.253503	-0.404267			Ga0212129_111902	-0.229251	-0.55528		Ga0212129_111902	-0.243828	-0.427145		Ga0212129_111902	-0.169054	-0.254955			Ga0212129_111902	-0.247656	-0.385904		Ga0212129_111902	-0.182504	-0.330705		Ga0212129_111902	0.208207	0.425238			Ga0212129_111902	0.209542	0.442323		Ga0212129_111902	-0.18704	-0.353683		Ga0212129_111902	-0.0180688	-0.0309625
Ga0212129_111903	-0.0634254	-0.257661		Ga0212129_111903	0.295646	1.02081		Ga0212129_111903	0.445511	1.80137			Ga0212129_111903	0.00784268	0.03059		Ga0212129_111903	0.263375	0.895483		Ga0212129_111903	0.199056	0.714011			Ga0212129_111903	0.0317112	0.116843		Ga0212129_111903	0.116873	0.455629		Ga0212129_111903	0.269862	1.09831			Ga0212129_111903	0.260371	0.991377		Ga0212129_111903	0.125675	0.477493		Ga0212129_111903	0.11598	0.41765
Ga0212129_111904	-0.673409	-1.47556		Ga0212129_111904	0.034114	0.0865001		Ga0212129_111904	-0.0624058	-0.13668			Ga0212129_111904	-0.351671	-1.11597		Ga0212129_111904	-0.508987	-1.3863		Ga0212129_111904	-0.443465	-1.36693			Ga0212129_111904	-0.550171	-1.59063		Ga0212129_111904	-0.558809	-1.39044		Ga0212129_111904	-0.612063	-1.98456			Ga0212129_111904	-0.474847	-1.31986		Ga0212129_111904	-0.50747	-1.58632		Ga0212129_111904	-0.569105	-1.77389
Ga0212129_111907	-0.178363	-0.942794		Ga0212129_111907	0.0986827	0.460019		Ga0212129_111907	-0.112291	-0.542087			Ga0212129_111907	-0.251848	-1.41129		Ga0212129_111907	-0.194515	-0.906261		Ga0212129_111907	-0.178323	-0.927802			Ga0212129_111907	-0.279246	-1.53595		Ga0212129_111907	-0.186704	-0.976698		Ga0212129_111907	-0.203308	-1.02512			Ga0212129_111907	-0.222361	-1.12044		Ga0212129_111907	-0.134094	-0.674226		Ga0212129_111907	-0.225168	-1.09175
Ga0212129_111908	-0.215487	-1.08241		Ga0212129_111908	-0.0520457	-0.222022		Ga0212129_111908	-0.336147	-1.48827			Ga0212129_111908	-0.149742	-0.67888		Ga0212129_111908	0.0587664	0.293622		Ga0212129_111908	0.0866757	0.483576			Ga0212129_111908	-0.179293	-0.928801		Ga0212129_111908	0.110601	0.554835		Ga0212129_111908	-0.00155395	-0.00764488			Ga0212129_111908	-0.0591555	-0.297043		Ga0212129_111908	-0.0241974	-0.116292		Ga0212129_111908	-0.138132	-0.714369
Ga0212129_111910	0.0687135	0.150936		Ga0212129_111910	-0.516306	-1.47652		Ga0212129_111910	-1.19439	-2.86283			Ga0212129_111910	-0.490501	-1.81978		Ga0212129_111910	-0.687251	-1.91844		Ga0212129_111910	-0.412667	-1.57615			Ga0212129_111910	-0.449812	-1.68931		Ga0212129_111910	-0.0768732	-0.291449		Ga0212129_111910	-0.382263	-1.22573			Ga0212129_111910	-0.242186	-0.897502		Ga0212129_111910	-0.522499	-1.83784		Ga0212129_111910	-0.613864	-1.9446
Ga0212129_111914	-0.910364	-1.56509		Ga0212129_111914	-0.754929	-0.896162		Ga0212129_111914	-0.980584	-1.69299			Ga0212129_111914	-0.807039	-2.02436		Ga0212129_111914	-1.03958	-1.87237		Ga0212129_111914	-0.864113	-1.6968			Ga0212129_111914	-0.924576	-1.51348		Ga0212129_111914	-0.561996	-1.01524		Ga0212129_111914	-0.657301	-1.41349			Ga0212129_111914	-0.692871	-1.21082		Ga0212129_111914	-0.603925	-1.40013		Ga0212129_111914	-0.897594	-1.75766
Ga0212129_111919	-1.18851	-3.81617		Ga0212129_111919	-0.431941	-1.03076		Ga0212129_111919	-0.50834	-1.80664			Ga0212129_111919	-0.448778	-1.74079		Ga0212129_111919	-0.258217	-1.06895		Ga0212129_111919	-0.463761	-1.89947			Ga0212129_111919	-0.391839	-1.56631		Ga0212129_111919	-0.437188	-2.01805		Ga0212129_111919	-0.615384	-2.13658			Ga0212129_111919	-0.273295	-1.27717		Ga0212129_111919	-0.520843	-2.2409		Ga0212129_111919	-0.609977	-2.32589
Ga0212129_111920	-0.166088	-0.535667		Ga0212129_111920	-0.565883	-1.33197		Ga0212129_111920	-0.413363	-0.658313			Ga0212129_111920	-0.47804	-1.80944		Ga0212129_111920	-0.398677	-1.53195		Ga0212129_111920	-0.122224	-0.403372			Ga0212129_111920	-0.319383	-1.19575		Ga0212129_111920	-0.0166903	-0.0665974		Ga0212129_111920	-0.240066	-0.849513			Ga0212129_111920	-0.251452	-0.900625		Ga0212129_111920	-0.278145	-0.898075		Ga0212129_111920	-0.329125	-1.26519
Ga0212129_111922	0.117508	0.245947		Ga0212129_111922	0.000842628	0.0018394		Ga0212129_111922	0.299008	0.704813			Ga0212129_111922	0.112698	0.214438		Ga0212129_111922	-0.067646	-0.106936		Ga0212129_111922	-0.132645	-0.195787			Ga0212129_111922	-0.174637	-0.281087		Ga0212129_111922	-0.0017756	-0.0022611		Ga0212129_111922	-0.294014	-0.423491			Ga0212129_111922	-0.158834	-0.238775		Ga0212129_111922	0.321497	0.455718		Ga0212129_111922	0.142849	0.259294
Ga0212129_111927	-1.20045	-2.46606		Ga0212129_111927	-0.503758	-0.668365		Ga0212129_111927	-0.392848	-1.04298			Ga0212129_111927	-0.638056	-1.63768		Ga0212129_111927	-0.820892	-1.73262		Ga0212129_111927	-0.748158	-1.76808			Ga0212129_111927	-0.818622	-1.80506		Ga0212129_111927	-0.796389	-1.71568		Ga0212129_111927	-0.743796	-1.50164			Ga0212129_111927	-0.799194	-1.73295		Ga0212129_111927	-0.411086	-0.901847		Ga0212129_111927	-0.669194	-1.59156
Ga0212129_111930	-0.109637	-0.546586		Ga0212129_111930	0.110078	0.504807		Ga0212129_111930	-0.0300585	-0.162265			Ga0212129_111930	-0.211883	-1.1662		Ga0212129_111930	0.0109168	0.059038		Ga0212129_111930	0.0176961	0.0967131			Ga0212129_111930	-0.12272	-0.720136		Ga0212129_111930	0.0135816	0.0752359		Ga0212129_111930	-0.0409834	-0.22102			Ga0212129_111930	-0.0561079	-0.299175		Ga0212129_111930	-0.0320925	-0.169909		Ga0212129_111930	-0.103517	-0.612726
Ga0212129_111936	0.275156	1.56647		Ga0212129_111936	0.289254	1.51869		Ga0212129_111936	0.0436251	0.285644			Ga0212129_111936	0.139211	0.999968		Ga0212129_111936	0.163829	1.09919		Ga0212129_111936	0.188765	1.26898			Ga0212129_111936	0.141277	0.994059		Ga0212129_111936	0.132	0.919606		Ga0212129_111936	0.216203	1.46212			Ga0212129_111936	0.229783	1.64035		Ga0212129_111936	0.176414	1.2272		Ga0212129_111936	0.192666	1.32045
Ga0212129_111939	-0.181247	-0.617621		Ga0212129_111939	-1.20893	-3.02248		Ga0212129_111939	-0.257726	-0.833097			Ga0212129_111939	-0.959603	-3.99726		Ga0212129_111939	-0.890799	-3.37327		Ga0212129_111939	-0.67768	-2.48336			Ga0212129_111939	0.0363101	0.14409		Ga0212129_111939	0.195274	0.688237		Ga0212129_111939	0.0973738	0.381686			Ga0212129_111939	-1.05668	-3.73021		Ga0212129_111939	-0.753453	-2.93742		Ga0212129_111939	-0.391238	-1.65742
Ga0212129_11194	-0.311013	-1.40851		Ga0212129_11194	-0.341812	-1.31592		Ga0212129_11194	-0.0114899	-0.0470783			Ga0212129_11194	-0.156444	-0.745123		Ga0212129_11194	-0.277746	-1.29413		Ga0212129_11194	-0.108062	-0.520112			Ga0212129_11194	-0.109708	-0.596884		Ga0212129_11194	-0.044617	-0.191876		Ga0212129_11194	-0.234697	-1.03889			Ga0212129_11194	-0.00335528	-0.0163728		Ga0212129_11194	-0.223125	-1.05987		Ga0212129_11194	-0.0782468	-0.367772
Ga0212129_111940	0.26059	1.3001		Ga0212129_111940	0.188268	0.883954		Ga0212129_111940	0.139474	0.57012			Ga0212129_111940	-0.0151985	-0.0944176		Ga0212129_111940	-0.0107574	-0.0619426		Ga0212129_111940	-0.0323453	-0.173703			Ga0212129_111940	0.0393582	0.22134		Ga0212129_111940	0.0647564	0.392843		Ga0212129_111940	0.0364333	0.242312			Ga0212129_111940	-0.0656214	-0.409483		Ga0212129_111940	-0.0614156	-0.40073		Ga0212129_111940	0.0971922	0.587363
Ga0212129_111941	-0.388259	-0.689055		Ga0212129_111941	-0.493091	-0.587844		Ga0212129_111941	0.447185	0.919015			Ga0212129_111941	0.177479	0.345126		Ga0212129_111941	-0.087643	-0.172777		Ga0212129_111941	-0.114325	-0.167385			Ga0212129_111941	0.00330936	0.00672258		Ga0212129_111941	-0.431034	-0.809335		Ga0212129_111941	-0.123139	-0.215332			Ga0212129_111941	0.0171124	0.0292569		Ga0212129_111941	0.0129273	0.0253974		Ga0212129_111941	-0.146644	-0.213225
Ga0212129_111942	0.190731	0.879398		Ga0212129_111942	0.0254394	0.100876		Ga0212129_111942	0.0107599	0.0461351			Ga0212129_111942	0.140211	0.67093		Ga0212129_111942	0.297523	1.50212		Ga0212129_111942	0.216688	1.13587			Ga0212129_111942	0.165991	0.836848		Ga0212129_111942	0.261439	1.29484		Ga0212129_111942	0.257543	1.41886			Ga0212129_111942	0.116724	0.613517		Ga0212129_111942	0.346971	1.86497		Ga0212129_111942	0.102492	0.592184
Ga0212129_111943	0.109648	0.422327		Ga0212129_111943	-0.000452933	-0.00238083		Ga0212129_111943	0.0578197	0.232657			Ga0212129_111943	0.119897	0.557779		Ga0212129_111943	0.185767	1.04925		Ga0212129_111943	0.113703	0.597404			Ga0212129_111943	0.0182015	0.0953351		Ga0212129_111943	0.105512	0.517338		Ga0212129_111943	0.0517746	0.264968			Ga0212129_111943	0.180708	0.87256		Ga0212129_111943	0.122621	0.605471		Ga0212129_111943	0.0258028	0.138255
Ga0212129_111944	-0.0260361	-0.109837		Ga0212129_111944	0.0198004	0.0914387		Ga0212129_111944	-0.291907	-1.0983			Ga0212129_111944	-0.15982	-0.821073		Ga0212129_111944	-0.198564	-1.02377		Ga0212129_111944	-0.159154	-0.767078			Ga0212129_111944	-0.132034	-0.741357		Ga0212129_111944	-0.20253	-0.999899		Ga0212129_111944	-0.144413	-0.750779			Ga0212129_111944	-0.0423985	-0.218733		Ga0212129_111944	-0.100563	-0.518313		Ga0212129_111944	-0.184797	-0.998048
Ga0212129_111945	-0.236033	-1.59921		Ga0212129_111945	-0.218312	-1.3247		Ga0212129_111945	-0.28853	-1.79739			Ga0212129_111945	-0.185048	-1.41595		Ga0212129_111945	-0.178916	-1.27289		Ga0212129_111945	-0.174095	-1.23962			Ga0212129_111945	-0.199422	-1.39799		Ga0212129_111945	-0.287535	-2.01603		Ga0212129_111945	-0.13316	-0.993095			Ga0212129_111945	-0.245967	-1.8397		Ga0212129_111945	-0.193962	-1.43031		Ga0212129_111945	-0.195945	-1.47833
Ga0212129_111946	0.0711383	0.246731		Ga0212129_111946	-0.0315745	-0.114329		Ga0212129_111946	0.0553485	0.220398			Ga0212129_111946	-0.0997208	-0.503233		Ga0212129_111946	-0.0412867	-0.190238		Ga0212129_111946	0.00735372	0.0366816			Ga0212129_111946	0.0183457	0.0986238		Ga0212129_111946	-0.0121271	-0.0641453		Ga0212129_111946	0.0457431	0.210604			Ga0212129_111946	-0.178553	-0.915381		Ga0212129_111946	-0.0710304	-0.340401		Ga0212129_111946	-0.012655	-0.0665178
Ga0212129_111947	0.0472655	0.225173		Ga0212129_111947	0.0142328	0.0590021		Ga0212129_111947	-0.179568	-0.869256			Ga0212129_111947	-0.019956	-0.125823		Ga0212129_111947	0.0532206	0.297995		Ga0212129_111947	0.195207	1.06347			Ga0212129_111947	0.0525845	0.343874		Ga0212129_111947	-0.02527	-0.145422		Ga0212129_111947	0.00358318	0.0210515			Ga0212129_111947	0.0600625	0.358101		Ga0212129_111947	0.101022	0.570073		Ga0212129_111947	0.176383	1.09921
Ga0212129_111948	0.037416	0.210835		Ga0212129_111948	0.203913	1.10999		Ga0212129_111948	0.283869	1.63542			Ga0212129_111948	0.199483	1.39687		Ga0212129_111948	0.135868	0.897712		Ga0212129_111948	0.103975	0.65741			Ga0212129_111948	0.123018	0.825776		Ga0212129_111948	0.109882	0.667993		Ga0212129_111948	0.128315	0.811697			Ga0212129_111948	0.0695632	0.415804		Ga0212129_111948	0.143868	0.891297		Ga0212129_111948	0.163728	0.995419
Ga0212129_111949	0.0134097	0.0968333		Ga0212129_111949	0.0686216	0.39188		Ga0212129_111949	0.0969104	0.641196			Ga0212129_111949	0.0341401	0.256381		Ga0212129_111949	-0.0129584	-0.0945568		Ga0212129_111949	0.0544052	0.395734			Ga0212129_111949	-0.0477408	-0.358518		Ga0212129_111949	-0.0297696	-0.221445		Ga0212129_111949	-0.00380257	-0.0288624			Ga0212129_111949	-0.0682896	-0.50239		Ga0212129_111949	0.00232484	0.0175044		Ga0212129_111949	-0.0388113	-0.291539
Ga0212129_11195	-0.164804	-0.968429		Ga0212129_11195	0.0232967	0.126578		Ga0212129_11195	-0.151744	-0.892811			Ga0212129_11195	-0.0843147	-0.48787		Ga0212129_11195	-0.0442199	-0.275092		Ga0212129_11195	-0.0635418	-0.385466			Ga0212129_11195	0.0147855	0.0941465		Ga0212129_11195	-0.105166	-0.650116		Ga0212129_11195	-0.103024	-0.67354			Ga0212129_11195	-0.0160351	-0.0974775		Ga0212129_11195	-0.224533	-1.31635		Ga0212129_11195	-0.1353	-0.862287
Ga0212129_111950	-0.276429	-1.46513		Ga0212129_111950	0.138081	0.65647		Ga0212129_111950	-0.0823208	-0.40429			Ga0212129_111950	-0.423956	-2.60001		Ga0212129_111950	-0.293738	-1.77061		Ga0212129_111950	-0.290148	-1.66071			Ga0212129_111950	-0.357863	-2.2636		Ga0212129_111950	-0.221666	-1.26285		Ga0212129_111950	-0.373257	-2.26836			Ga0212129_111950	-0.371355	-2.13337		Ga0212129_111950	-0.410358	-2.50416		Ga0212129_111950	-0.475613	-3.03442
Ga0212129_111951	-0.338836	-1.35819		Ga0212129_111951	-0.28049	-0.905313		Ga0212129_111951	-0.262846	-1.01741			Ga0212129_111951	0.0371538	0.207138		Ga0212129_111951	0.108725	0.483584		Ga0212129_111951	0.106435	0.492227			Ga0212129_111951	-0.118285	-0.535143		Ga0212129_111951	0.0509151	0.221801		Ga0212129_111951	-0.0509363	-0.232902			Ga0212129_111951	0.077292	0.354835		Ga0212129_111951	0.0321676	0.150527		Ga0212129_111951	-0.11802	-0.524944
Ga0212129_111952	-0.689235	-2.16351		Ga0212129_111952	-0.0995829	-0.24202		Ga0212129_111952	-0.508948	-1.4996			Ga0212129_111952	-0.0672687	-0.289152		Ga0212129_111952	-0.104678	-0.404591		Ga0212129_111952	-0.158283	-0.609158			Ga0212129_111952	-0.279207	-1.07459		Ga0212129_111952	-0.185056	-0.777311		Ga0212129_111952	-0.074025	-0.273252			Ga0212129_111952	-0.196589	-0.848234		Ga0212129_111952	-0.0790106	-0.319934		Ga0212129_111952	0.0826766	0.35651
Ga0212129_111953	0.342095	0.827284		Ga0212129_111953	0.184417	0.46934		Ga0212129_111953	-0.190764	-0.460699			Ga0212129_111953	-0.257982	-0.761425		Ga0212129_111953	-0.445094	-1.27559		Ga0212129_111953	-0.409648	-1.00963			Ga0212129_111953	-0.428198	-1.27439		Ga0212129_111953	-0.299634	-0.935461		Ga0212129_111953	-0.48309	-1.2089			Ga0212129_111953	-0.262387	-0.568699		Ga0212129_111953	-0.406044	-1.05176		Ga0212129_111953	-0.26784	-0.639615
Ga0212129_111954	0.0785713	0.291664		Ga0212129_111954	-0.0766061	-0.205385		Ga0212129_111954	-0.198314	-0.833497			Ga0212129_111954	-0.243203	-1.12968		Ga0212129_111954	-0.173828	-0.733815		Ga0212129_111954	-0.231657	-1.02375			Ga0212129_111954	-0.426304	-1.88264		Ga0212129_111954	-0.4565	-2.01856		Ga0212129_111954	-0.333934	-1.66995			Ga0212129_111954	-0.258403	-1.20533		Ga0212129_111954	-0.393125	-1.65737		Ga0212129_111954	-0.158028	-0.72268
Ga0212129_111955	-0.190961	-1.07086		Ga0212129_111955	-0.112148	-0.611252		Ga0212129_111955	0.0396986	0.234674			Ga0212129_111955	0.0287539	0.201543		Ga0212129_111955	-0.00174754	-0.0125839		Ga0212129_111955	0.0621316	0.42078			Ga0212129_111955	-0.169724	-1.17467		Ga0212129_111955	-0.0376092	-0.252063		Ga0212129_111955	-0.0186501	-0.131004			Ga0212129_111955	-0.0147862	-0.098058		Ga0212129_111955	-0.0655796	-0.447409		Ga0212129_111955	-0.00662488	-0.0461443
Ga0212129_111956	0.273655	0.869554		Ga0212129_111956	0.531143	2.10276		Ga0212129_111956	0.380672	1.23986			Ga0212129_111956	0.417153	1.9924		Ga0212129_111956	0.529957	2.37853		Ga0212129_111956	0.321847	1.18804			Ga0212129_111956	0.287686	1.37327		Ga0212129_111956	0.38943	1.60702		Ga0212129_111956	0.487582	2.21279			Ga0212129_111956	0.276836	1.30154		Ga0212129_111956	0.309551	1.46379		Ga0212129_111956	0.291237	1.37122
Ga0212129_111957	-0.062531	-0.27189		Ga0212129_111957	-0.295017	-0.982317		Ga0212129_111957	0.275799	0.964174			Ga0212129_111957	0.0431124	0.202913		Ga0212129_111957	0.131629	0.617295		Ga0212129_111957	0.0904735	0.397122			Ga0212129_111957	0.0852799	0.355254		Ga0212129_111957	0.220511	0.998072		Ga0212129_111957	0.174268	0.863208			Ga0212129_111957	-0.048262	-0.204575		Ga0212129_111957	0.0821417	0.374221		Ga0212129_111957	0.128773	0.513864
Ga0212129_111959	0.0424707	0.127382		Ga0212129_111959	0.926486	2.01084		Ga0212129_111959	-0.201301	-0.352924			Ga0212129_111959	-0.308066	-0.846867		Ga0212129_111959	-0.301527	-0.831988		Ga0212129_111959	-0.362557	-0.912973			Ga0212129_111959	-0.335287	-0.733718		Ga0212129_111959	-0.0549214	-0.126459		Ga0212129_111959	0.09181	0.198034			Ga0212129_111959	-0.0326566	-0.0731729		Ga0212129_111959	-0.303132	-0.793697		Ga0212129_111959	-0.00355343	-0.00707653
Ga0212129_111960	-0.163257	-0.637627		Ga0212129_111960	0.191459	0.562842		Ga0212129_111960	0.00399693	0.015609			Ga0212129_111960	-0.054134	-0.261054		Ga0212129_111960	0.0386777	0.183299		Ga0212129_111960	0.136216	0.717944			Ga0212129_111960	-0.0812566	-0.395751		Ga0212129_111960	0.141692	0.669715		Ga0212129_111960	0.0906988	0.421041			Ga0212129_111960	-0.040202	-0.18511		Ga0212129_111960	0.0925615	0.420165		Ga0212129_111960	-0.00848424	-0.0392356
Ga0212129_111962	0.281559	1.35357		Ga0212129_111962	0.638462	2.91896		Ga0212129_111962	0.138452	0.601339			Ga0212129_111962	0.251599	1.55045		Ga0212129_111962	0.392171	2.38824		Ga0212129_111962	0.370306	2.22181			Ga0212129_111962	0.256931	1.44642		Ga0212129_111962	0.407689	2.39148		Ga0212129_111962	0.317425	1.88062			Ga0212129_111962	0.31703	1.98319		Ga0212129_111962	0.189413	1.06132		Ga0212129_111962	0.305713	1.83256
Ga0212129_111963	0.0878636	0.387284		Ga0212129_111963	-0.32346	-1.10949		Ga0212129_111963	-0.382287	-1.52245			Ga0212129_111963	-0.0742006	-0.382471		Ga0212129_111963	-0.323245	-1.30668		Ga0212129_111963	-0.40771	-1.89068			Ga0212129_111963	-0.288681	-1.36793		Ga0212129_111963	-0.486499	-2.23968		Ga0212129_111963	-0.15342	-0.680319			Ga0212129_111963	-0.155169	-0.618532		Ga0212129_111963	-0.390766	-1.728		Ga0212129_111963	-0.26078	-1.2679
Ga0212129_111964	-0.620718	-2.12138		Ga0212129_111964	-1.02862	-3.05744		Ga0212129_111964	-1.03088	-3.57057			Ga0212129_111964	-0.592134	-3.00074		Ga0212129_111964	-0.861333	-4.34721		Ga0212129_111964	-0.448196	-2.0801			Ga0212129_111964	-0.750047	-3.79337		Ga0212129_111964	-0.71553	-3.53809		Ga0212129_111964	-0.911875	-4.42281			Ga0212129_111964	-0.526065	-2.58939		Ga0212129_111964	-0.639923	-3.21112		Ga0212129_111964	-0.792443	-3.9149
Ga0212129_111965	-0.508454	-3.19225		Ga0212129_111965	-0.669218	-3.46148		Ga0212129_111965	-0.888169	-4.70123			Ga0212129_111965	-0.476751	-3.25146		Ga0212129_111965	-0.729602	-5.17537		Ga0212129_111965	-0.58621	-4.17407			Ga0212129_111965	-0.659836	-4.35932		Ga0212129_111965	-0.689019	-4.88394		Ga0212129_111965	-0.636097	-4.10307			Ga0212129_111965	-0.514655	-3.44983		Ga0212129_111965	-0.655668	-4.50871		Ga0212129_111965	-0.644481	-4.48032
Ga0212129_111966	0.0125534	0.0431978		Ga0212129_111966	-1.13689	-3.32584		Ga0212129_111966	-0.467471	-1.02605			Ga0212129_111966	-0.392578	-1.73098		Ga0212129_111966	-0.778718	-3.56808		Ga0212129_111966	-0.695272	-2.75488			Ga0212129_111966	-0.727363	-2.81002		Ga0212129_111966	-1.00603	-3.73612		Ga0212129_111966	-0.703456	-2.77831			Ga0212129_111966	-0.440028	-1.84126		Ga0212129_111966	-0.66681	-2.41857		Ga0212129_111966	-0.77795	-3.05838
Ga0212129_111971	0.0249371	0.114346		Ga0212129_111971	0.411246	1.3636		Ga0212129_111971	0.437587	1.92178			Ga0212129_111971	0.215738	0.955141		Ga0212129_111971	0.466773	2.21809		Ga0212129_111971	0.193075	0.92193			Ga0212129_111971	0.157931	0.70967		Ga0212129_111971	0.416649	1.82418		Ga0212129_111971	0.360117	1.66281			Ga0212129_111971	0.226818	1.09559		Ga0212129_111971	0.210068	1.00335		Ga0212129_111971	0.262	1.1737
Ga0212129_111972	0.184354	0.82508		Ga0212129_111972	0.387398	1.59893		Ga0212129_111972	0.0775295	0.299275			Ga0212129_111972	0.30014	1.66789		Ga0212129_111972	0.293933	1.40595		Ga0212129_111972	0.304482	1.43838			Ga0212129_111972	0.142375	0.724164		Ga0212129_111972	0.160869	0.736841		Ga0212129_111972	0.174685	0.919195			Ga0212129_111972	0.273953	1.43164		Ga0212129_111972	0.199129	0.973541		Ga0212129_111972	0.160622	0.77785
Ga0212129_111973	0.403189	1.71242		Ga0212129_111973	0.65863	2.33349		Ga0212129_111973	0.18119	0.704134			Ga0212129_111973	0.17255	0.881542		Ga0212129_111973	0.306916	1.46548		Ga0212129_111973	0.162595	0.830206			Ga0212129_111973	0.179915	1.01138		Ga0212129_111973	0.190984	0.967648		Ga0212129_111973	0.177422	0.849682			Ga0212129_111973	0.169415	0.840342		Ga0212129_111973	-0.00113274	-0.00540436		Ga0212129_111973	0.152306	0.765622
Ga0212129_111974	-0.0412039	-0.220523		Ga0212129_111974	0.108518	0.506457		Ga0212129_111974	0.121708	0.636305			Ga0212129_111974	-0.0626133	-0.385442		Ga0212129_111974	-0.0935341	-0.54983		Ga0212129_111974	0.0343269	0.203948			Ga0212129_111974	-0.152687	-0.955752		Ga0212129_111974	-0.0925939	-0.557433		Ga0212129_111974	-0.090034	-0.573501			Ga0212129_111974	-0.0753616	-0.427464		Ga0212129_111974	-0.00640755	-0.0385288		Ga0212129_111974	-0.107676	-0.620641
Ga0212129_111975	-0.178007	-0.839752		Ga0212129_111975	-0.119347	-0.507863		Ga0212129_111975	-0.389641	-1.42648			Ga0212129_111975	-0.0669392	-0.383531		Ga0212129_111975	0.0779651	0.395932		Ga0212129_111975	-0.110064	-0.623281			Ga0212129_111975	-0.0944203	-0.508696		Ga0212129_111975	0.048505	0.278116		Ga0212129_111975	0.0327969	0.176338			Ga0212129_111975	0.171905	0.842067		Ga0212129_111975	-0.0550134	-0.290362		Ga0212129_111975	-0.136147	-0.730293
Ga0212129_111976	-0.175012	-0.856296		Ga0212129_111976	-0.0179777	-0.0766871		Ga0212129_111976	0.160178	0.790357			Ga0212129_111976	0.0719279	0.389584		Ga0212129_111976	-0.0282799	-0.159035		Ga0212129_111976	-0.0448351	-0.245741			Ga0212129_111976	-0.0807037	-0.462408		Ga0212129_111976	-0.147608	-0.808106		Ga0212129_111976	-0.109051	-0.653027			Ga0212129_111976	-0.066745	-0.358198		Ga0212129_111976	-0.161524	-0.883367		Ga0212129_111976	-0.190249	-0.975051
Ga0212129_111977	-0.143377	-0.707796		Ga0212129_111977	0.0754735	0.289455		Ga0212129_111977	-0.0907813	-0.406753			Ga0212129_111977	-0.115953	-0.6435		Ga0212129_111977	0.0516212	0.319713		Ga0212129_111977	0.24976	1.56987			Ga0212129_111977	-0.0355419	-0.218222		Ga0212129_111977	0.0377526	0.209449		Ga0212129_111977	0.0333741	0.200642			Ga0212129_111977	-0.0198714	-0.113997		Ga0212129_111977	-0.0442588	-0.272358		Ga0212129_111977	-0.0103499	-0.0576096
Ga0212129_111979	0.0127648	0.0494019		Ga0212129_111979	-0.168239	-0.567485		Ga0212129_111979	0.029344	0.10697			Ga0212129_111979	-0.154414	-0.777296		Ga0212129_111979	-0.0916993	-0.433618		Ga0212129_111979	-0.0703369	-0.307608			Ga0212129_111979	-0.189454	-0.8743		Ga0212129_111979	-0.152497	-0.687151		Ga0212129_111979	-0.101635	-0.441516			Ga0212129_111979	-0.222235	-1.04213		Ga0212129_111979	-0.104101	-0.467399		Ga0212129_111979	-0.100878	-0.444882
Ga0212129_111980	0.204158	0.97139		Ga0212129_111980	0.285165	1.67133		Ga0212129_111980	0.420312	1.91643			Ga0212129_111980	0.0182438	0.0968477		Ga0212129_111980	0.228486	1.32129		Ga0212129_111980	0.14319	0.804131			Ga0212129_111980	0.154419	0.977013		Ga0212129_111980	0.120215	0.746657		Ga0212129_111980	0.200145	1.19825			Ga0212129_111980	0.189554	1.11648		Ga0212129_111980	0.245827	1.56993		Ga0212129_111980	-0.0604651	-0.340673
Ga0212129_111981	-1.35737	-3.1095		Ga0212129_111981	-0.980084	-2.24057		Ga0212129_111981	-0.615255	-1.26101			Ga0212129_111981	-0.541807	-2.01419		Ga0212129_111981	-0.538688	-2.12722		Ga0212129_111981	-0.249748	-1.02707			Ga0212129_111981	-0.522325	-2.05232		Ga0212129_111981	-0.469386	-1.75119		Ga0212129_111981	-0.255923	-1.04752			Ga0212129_111981	-0.785585	-3.05009		Ga0212129_111981	-0.23042	-0.917769		Ga0212129_111981	-0.228536	-0.780891
Ga0212129_111983	-0.0976213	-0.466847		Ga0212129_111983	-0.146738	-0.621354		Ga0212129_111983	-0.0182887	-0.0827503			Ga0212129_111983	-0.138385	-0.872756		Ga0212129_111983	0.00792354	0.0452399		Ga0212129_111983	-0.10892	-0.613659			Ga0212129_111983	-0.0861782	-0.507584		Ga0212129_111983	-0.18136	-1.04268		Ga0212129_111983	-0.0920422	-0.536641			Ga0212129_111983	-0.0332731	-0.192668		Ga0212129_111983	-0.145331	-0.886937		Ga0212129_111983	-0.136513	-0.837402
Ga0212129_111985	-0.405805	-0.987388		Ga0212129_111985	0.0517011	0.113784		Ga0212129_111985	0.173811	0.526059			Ga0212129_111985	-0.527519	-1.30484		Ga0212129_111985	-0.303428	-0.863712		Ga0212129_111985	-0.236799	-0.700128			Ga0212129_111985	-0.326508	-1.01328		Ga0212129_111985	-0.264409	-0.73738		Ga0212129_111985	-0.24784	-0.745877			Ga0212129_111985	-0.348131	-1.10034		Ga0212129_111985	-0.390402	-1.21137		Ga0212129_111985	-0.244303	-0.622417
Ga0212129_111990	0.222457	0.874347		Ga0212129_111990	0.285961	0.655745		Ga0212129_111990	-0.593613	-1.5651			Ga0212129_111990	-0.262747	-0.999652		Ga0212129_111990	-0.309929	-1.47566		Ga0212129_111990	-0.315924	-1.36401			Ga0212129_111990	-0.305722	-1.39511		Ga0212129_111990	-0.189614	-0.678676		Ga0212129_111990	-0.171531	-0.766247			Ga0212129_111990	-0.341415	-1.16062		Ga0212129_111990	-0.224948	-0.964108		Ga0212129_111990	-0.243306	-1.03843
Ga0212129_111991	0.149827	0.704961		Ga0212129_111991	0.351185	1.73264		Ga0212129_111991	0.233564	0.916868			Ga0212129_111991	0.22183	1.02478		Ga0212129_111991	0.382305	1.99956		Ga0212129_111991	0.290488	1.47842			Ga0212129_111991	0.198331	0.867296		Ga0212129_111991	0.326512	1.54893		Ga0212129_111991	0.429915	2.18382			Ga0212129_111991	0.334357	1.77042		Ga0212129_111991	0.274317	1.45369		Ga0212129_111991	0.270704	1.33014
Ga0212129_111992	-0.276428	-1.01801		Ga0212129_111992	0.293452	0.873999		Ga0212129_111992	0.205856	0.729731			Ga0212129_111992	0.0971559	0.437638		Ga0212129_111992	0.2959	1.15059		Ga0212129_111992	0.1746	0.793121			Ga0212129_111992	0.195762	0.752895		Ga0212129_111992	0.329172	1.55236		Ga0212129_111992	0.289105	1.15006			Ga0212129_111992	0.217777	0.872591		Ga0212129_111992	0.258874	1.15204		Ga0212129_111992	0.217729	0.857162
Ga0212129_111995	0.243104	0.711308		Ga0212129_111995	-0.409632	-0.835791		Ga0212129_111995	-0.589114	-1.43371			Ga0212129_111995	-0.159922	-0.522101		Ga0212129_111995	-0.0802451	-0.27875		Ga0212129_111995	-0.0260255	-0.0768986			Ga0212129_111995	-0.259738	-0.876499		Ga0212129_111995	-0.441581	-1.06886		Ga0212129_111995	-0.00482616	-0.0104503			Ga0212129_111995	0.0224648	0.0564452		Ga0212129_111995	0.0817546	0.267695		Ga0212129_111995	-0.113288	-0.300621
Ga0212129_111996	-1.23785	-2.6468		Ga0212129_111996	-0.122476	-0.337911		Ga0212129_111996	-0.704763	-1.63025			Ga0212129_111996	-0.615453	-2.54338		Ga0212129_111996	-0.360759	-1.2999		Ga0212129_111996	-0.677999	-1.88048			Ga0212129_111996	-0.785963	-2.37993		Ga0212129_111996	-0.877202	-2.89006		Ga0212129_111996	-0.402007	-1.32667			Ga0212129_111996	-0.818392	-2.40502		Ga0212129_111996	-0.74711	-2.20805		Ga0212129_111996	-0.420019	-1.26455
Ga0212129_111997	-0.342177	-1.58581		Ga0212129_111997	0.0177391	0.0747426		Ga0212129_111997	-0.157149	-0.834701			Ga0212129_111997	-0.138198	-0.811705		Ga0212129_111997	-0.247464	-1.34837		Ga0212129_111997	-0.18221	-1.03293			Ga0212129_111997	-0.138097	-0.860805		Ga0212129_111997	-0.228692	-1.29173		Ga0212129_111997	-0.207223	-1.24488			Ga0212129_111997	-0.299703	-1.72144		Ga0212129_111997	-0.233881	-1.35827		Ga0212129_111997	-0.0863572	-0.4973
Ga0212129_111999	0.469939	1.03548		Ga0212129_111999	-0.0943557	-0.248889		Ga0212129_111999	0.0327216	0.102033			Ga0212129_111999	0.436137	1.4368		Ga0212129_111999	0.327574	1.04836		Ga0212129_111999	0.539494	1.63848			Ga0212129_111999	0.101947	0.315297		Ga0212129_111999	0.512859	1.50097		Ga0212129_111999	0.329441	0.847951			Ga0212129_111999	0.446389	1.40862		Ga0212129_111999	0.467664	1.37793		Ga0212129_111999	0.302314	0.727662
Ga0212129_11200	-2.58652	-8.45499		Ga0212129_11200	-3.06169	-8.7186		Ga0212129_11200	-2.81739	-7.4849			Ga0212129_11200	-2.94559	-13.2086		Ga0212129_11200	-3.14677	-14.0285		Ga0212129_11200	-3.26787	-14.0705			Ga0212129_11200	-2.53543	-12.6997		Ga0212129_11200	-3.08022	-12.3098		Ga0212129_11200	-3.12369	-13.8699			Ga0212129_11200	-2.68191	-13.5013		Ga0212129_11200	-3.23922	-12.9452		Ga0212129_11200	-3.36223	-12.7066
Ga0212129_112000	0.186905	0.671597		Ga0212129_112000	0.135077	0.408856		Ga0212129_112000	0.268533	1.12082			Ga0212129_112000	0.370097	1.84905		Ga0212129_112000	0.450496	1.88227		Ga0212129_112000	0.369846	1.86127			Ga0212129_112000	0.186775	0.851625		Ga0212129_112000	0.473726	2.41267		Ga0212129_112000	0.550699	2.74319			Ga0212129_112000	0.335028	1.72286		Ga0212129_112000	0.132745	0.647232		Ga0212129_112000	0.508808	2.53994
Ga0212129_112001	-0.530739	-2.66856		Ga0212129_112001	-0.735214	-2.8778		Ga0212129_112001	-0.727154	-3.11978			Ga0212129_112001	-0.226484	-1.41812		Ga0212129_112001	-0.359803	-2.09032		Ga0212129_112001	-0.291202	-1.87564			Ga0212129_112001	-0.573568	-3.07839		Ga0212129_112001	-0.184485	-1.02317		Ga0212129_112001	-0.336294	-1.94919			Ga0212129_112001	-0.350271	-1.97784		Ga0212129_112001	-0.25939	-1.3156		Ga0212129_112001	-0.37883	-2.21508
Ga0212129_112002	-0.632311	-1.55126		Ga0212129_112002	-0.0524869	-0.135743		Ga0212129_112002	-0.742606	-2.07321			Ga0212129_112002	-0.224086	-0.866582		Ga0212129_112002	-0.109649	-0.535875		Ga0212129_112002	-0.0858942	-0.37923			Ga0212129_112002	-0.274263	-1.31476		Ga0212129_112002	-0.155189	-0.557931		Ga0212129_112002	-0.0344712	-0.159843			Ga0212129_112002	-0.33139	-1.54542		Ga0212129_112002	-0.214117	-0.901938		Ga0212129_112002	-0.253163	-1.14847
Ga0212129_112003	-0.056224	-0.158796		Ga0212129_112003	-0.0883888	-0.263664		Ga0212129_112003	0.281542	0.854917			Ga0212129_112003	0.110346	0.43549		Ga0212129_112003	0.106354	0.414771		Ga0212129_112003	-0.157431	-0.566106			Ga0212129_112003	-0.0948942	-0.305284		Ga0212129_112003	0.113431	0.482679		Ga0212129_112003	0.105771	0.403535			Ga0212129_112003	-0.113583	-0.39132		Ga0212129_112003	0.137987	0.527295		Ga0212129_112003	0.135068	0.481052
Ga0212129_112004	-0.0704388	-0.337251		Ga0212129_112004	-0.196388	-0.734497		Ga0212129_112004	0.0200785	0.103808			Ga0212129_112004	0.122054	0.609503		Ga0212129_112004	0.238942	1.19399		Ga0212129_112004	0.232657	1.10342			Ga0212129_112004	0.152935	0.837652		Ga0212129_112004	0.197286	0.990805		Ga0212129_112004	0.247615	1.21859			Ga0212129_112004	0.264231	1.43654		Ga0212129_112004	0.213459	0.987355		Ga0212129_112004	0.217599	1.10911
Ga0212129_112005	-0.4865	-2.12782		Ga0212129_112005	0.195371	0.718759		Ga0212129_112005	-0.245182	-1.1495			Ga0212129_112005	-0.050551	-0.292046		Ga0212129_112005	-0.15287	-0.783676		Ga0212129_112005	-0.231031	-1.18449			Ga0212129_112005	-0.126516	-0.660552		Ga0212129_112005	-0.0223154	-0.0987993		Ga0212129_112005	0.00659819	0.034929			Ga0212129_112005	-0.162599	-0.80061		Ga0212129_112005	-0.234778	-1.16138		Ga0212129_112005	-0.191007	-0.985053
Ga0212129_112006	-1.30769	-3.64453		Ga0212129_112006	-1.44593	-3.10881		Ga0212129_112006	-1.04493	-2.48244			Ga0212129_112006	-0.599457	-2.08598		Ga0212129_112006	-1.01748	-3.28534		Ga0212129_112006	-1.1748	-4.69437			Ga0212129_112006	-0.87858	-3.53827		Ga0212129_112006	-1.20953	-3.31656		Ga0212129_112006	-1.51185	-4.91938			Ga0212129_112006	-0.657268	-2.7505		Ga0212129_112006	-1.48618	-5.27825		Ga0212129_112006	-1.44701	-3.84885
Ga0212129_112007	-0.605197	-1.99171		Ga0212129_112007	0.00107611	0.00324278		Ga0212129_112007	-0.335199	-0.798697			Ga0212129_112007	-0.555658	-2.62864		Ga0212129_112007	-0.166919	-0.635201		Ga0212129_112007	-0.174935	-0.760102			Ga0212129_112007	-0.650269	-2.75842		Ga0212129_112007	-0.347868	-1.45594		Ga0212129_112007	-0.372257	-1.62454			Ga0212129_112007	-0.494111	-2.09824		Ga0212129_112007	-0.409904	-2.00671		Ga0212129_112007	-0.209979	-0.914608
Ga0212129_11201	-0.0247963	-0.0901173		Ga0212129_11201	-0.0798064	-0.272512		Ga0212129_11201	0.106236	0.392919			Ga0212129_11201	0.105903	0.554779		Ga0212129_11201	-0.0374825	-0.185826		Ga0212129_11201	0.0154894	0.0708662			Ga0212129_11201	0.0703838	0.348112		Ga0212129_11201	-0.112515	-0.555526		Ga0212129_11201	-0.057745	-0.259787			Ga0212129_11201	0.106697	0.510922		Ga0212129_11201	-0.112615	-0.530643		Ga0212129_11201	0.044471	0.212246
Ga0212129_112010	-0.0929687	-0.383643		Ga0212129_112010	-0.109859	-0.483887		Ga0212129_112010	0.0552865	0.244041			Ga0212129_112010	-0.065832	-0.402179		Ga0212129_112010	0.0631374	0.352904		Ga0212129_112010	-0.0945631	-0.47423			Ga0212129_112010	-0.205327	-1.14104		Ga0212129_112010	0.0444015	0.227695		Ga0212129_112010	0.0338912	0.176057			Ga0212129_112010	-0.0259384	-0.140505		Ga0212129_112010	-0.11282	-0.622369		Ga0212129_112010	0.0812378	0.476182
Ga0212129_112011	0.363687	1.41169		Ga0212129_112011	0.0899223	0.330156		Ga0212129_112011	0.190947	0.920258			Ga0212129_112011	0.15054	0.709542		Ga0212129_112011	0.0710927	0.325651		Ga0212129_112011	0.155941	0.720809			Ga0212129_112011	0.0879586	0.400078		Ga0212129_112011	0.152376	0.667471		Ga0212129_112011	0.099582	0.469131			Ga0212129_112011	0.0414654	0.183458		Ga0212129_112011	0.105436	0.48714		Ga0212129_112011	-0.00346242	-0.0178465
Ga0212129_112012	0.0814402	0.466903		Ga0212129_112012	0.265996	1.34669		Ga0212129_112012	0.0727882	0.420114			Ga0212129_112012	0.0176348	0.107927		Ga0212129_112012	0.179661	1.09736		Ga0212129_112012	0.201062	1.22438			Ga0212129_112012	0.0393122	0.247276		Ga0212129_112012	0.183841	1.16085		Ga0212129_112012	0.228359	1.43953			Ga0212129_112012	0.0906057	0.550849		Ga0212129_112012	0.0761115	0.471104		Ga0212129_112012	0.13028	0.789145
Ga0212129_112016	-0.159636	-0.367849		Ga0212129_112016	-0.0835594	-0.203657		Ga0212129_112016	-0.131163	-0.375028			Ga0212129_112016	-0.0295459	-0.10941		Ga0212129_112016	0.0961139	0.380685		Ga0212129_112016	-0.00765106	-0.0253917			Ga0212129_112016	-0.0735977	-0.222913		Ga0212129_112016	-0.0846333	-0.267967		Ga0212129_112016	0.080549	0.276229			Ga0212129_112016	-0.0446794	-0.166154		Ga0212129_112016	-0.166369	-0.564757		Ga0212129_112016	-0.233933	-0.678893
Ga0212129_112017	0.0632068	0.17123		Ga0212129_112017	0.0631298	0.130378		Ga0212129_112017	0.660867	1.46609			Ga0212129_112017	0.170543	0.559816		Ga0212129_112017	0.152997	0.39498		Ga0212129_112017	0.135628	0.368881			Ga0212129_112017	0.0748686	0.205921		Ga0212129_112017	-0.151789	-0.391016		Ga0212129_112017	0.426543	1.03914			Ga0212129_112017	0.182536	0.409941		Ga0212129_112017	0.210813	0.646171		Ga0212129_112017	0.191321	0.602939
Ga0212129_11202	0.0846377	0.477392		Ga0212129_11202	0.044452	0.256534		Ga0212129_11202	-0.217155	-1.17552			Ga0212129_11202	-0.135461	-0.940027		Ga0212129_11202	-0.100677	-0.639861		Ga0212129_11202	-0.155296	-1.05768			Ga0212129_11202	-0.111917	-0.724686		Ga0212129_11202	-0.215554	-1.47615		Ga0212129_11202	-0.217226	-1.42118			Ga0212129_11202	-0.0865993	-0.550364		Ga0212129_11202	-0.214221	-1.43263		Ga0212129_11202	-0.196356	-1.24835
Ga0212129_112020	-0.438423	-0.940312		Ga0212129_112020	0.441184	0.857887		Ga0212129_112020	-0.223217	-0.68953			Ga0212129_112020	-0.388382	-1.32628		Ga0212129_112020	-0.122415	-0.429083		Ga0212129_112020	-0.00188365	-0.0066568			Ga0212129_112020	-0.373128	-1.38935		Ga0212129_112020	-0.639059	-2.24947		Ga0212129_112020	-0.421575	-1.50214			Ga0212129_112020	-0.0165384	-0.0571774		Ga0212129_112020	-0.142951	-0.56119		Ga0212129_112020	-0.0657244	-0.220926
Ga0212129_112022	0.375317	0.887181		Ga0212129_112022	-0.761088	-1.75973		Ga0212129_112022	0.473633	1.04471			Ga0212129_112022	0.0380686	0.115847		Ga0212129_112022	0.0580121	0.154293		Ga0212129_112022	0.48132	1.72027			Ga0212129_112022	0.284662	0.94098		Ga0212129_112022	0.232982	0.714906		Ga0212129_112022	0.279742	0.945036			Ga0212129_112022	0.104452	0.28907		Ga0212129_112022	0.254513	0.800718		Ga0212129_112022	0.257048	0.885048
Ga0212129_112023	-0.759585	-3.66424		Ga0212129_112023	-0.319868	-1.44165		Ga0212129_112023	-0.808477	-4.36269			Ga0212129_112023	-0.383564	-2.44001		Ga0212129_112023	-0.715514	-4.30171		Ga0212129_112023	-0.676723	-4.4203			Ga0212129_112023	-0.406803	-2.48826		Ga0212129_112023	-0.839233	-5.39924		Ga0212129_112023	-0.742996	-4.62283			Ga0212129_112023	-0.354392	-2.29852		Ga0212129_112023	-0.841545	-5.09688		Ga0212129_112023	-0.74614	-4.64027
Ga0212129_112024	-0.0367348	-0.108448		Ga0212129_112024	-0.386771	-1.00683		Ga0212129_112024	0.0986227	0.284846			Ga0212129_112024	0.272549	0.95747		Ga0212129_112024	-0.0347562	-0.129501		Ga0212129_112024	0.201083	0.692874			Ga0212129_112024	0.063401	0.232415		Ga0212129_112024	0.117937	0.403708		Ga0212129_112024	0.259326	0.953038			Ga0212129_112024	0.0927222	0.340821		Ga0212129_112024	0.0121667	0.0515621		Ga0212129_112024	0.233744	0.887893
Ga0212129_11204	-0.0587189	-0.273479		Ga0212129_11204	-0.422064	-1.78001		Ga0212129_11204	-0.193217	-0.888508			Ga0212129_11204	-0.25307	-1.43103		Ga0212129_11204	-0.0930179	-0.515292		Ga0212129_11204	-0.228015	-1.35974			Ga0212129_11204	-0.107899	-0.645363		Ga0212129_11204	-0.155576	-0.973153		Ga0212129_11204	-0.15001	-0.908479			Ga0212129_11204	0.0318415	0.1852		Ga0212129_11204	-0.0352692	-0.172081		Ga0212129_11204	-0.117583	-0.63202
Ga0212129_112042	-0.393508	-1.83392		Ga0212129_112042	0.186091	0.908165		Ga0212129_112042	-0.106307	-0.541479			Ga0212129_112042	0.0382008	0.227879		Ga0212129_112042	0.0470049	0.252275		Ga0212129_112042	-0.0235994	-0.124659			Ga0212129_112042	-0.0708993	-0.37255		Ga0212129_112042	-0.0905462	-0.494482		Ga0212129_112042	0.0291646	0.169066			Ga0212129_112042	0.0831753	0.429801		Ga0212129_112042	-0.0293538	-0.149398		Ga0212129_112042	-0.0292892	-0.168497
Ga0212129_112043	0.267656	0.98671		Ga0212129_112043	-0.368848	-1.58318		Ga0212129_112043	0.275789	0.999643			Ga0212129_112043	0.000926918	0.00363811		Ga0212129_112043	0.0673655	0.246673		Ga0212129_112043	-0.135179	-0.477467			Ga0212129_112043	-0.0357224	-0.145898		Ga0212129_112043	-0.0935706	-0.368356		Ga0212129_112043	0.194474	0.739477			Ga0212129_112043	-0.069013	-0.272874		Ga0212129_112043	0.0307589	0.101025		Ga0212129_112043	0.0407272	0.144787
Ga0212129_112044	0.166905	0.846822		Ga0212129_112044	0.159878	0.70339		Ga0212129_112044	0.209964	1.19565			Ga0212129_112044	0.193997	1.24642		Ga0212129_112044	0.203954	1.19877		Ga0212129_112044	0.24125	1.52617			Ga0212129_112044	0.098792	0.615398		Ga0212129_112044	0.24759	1.62715		Ga0212129_112044	0.284711	1.82951			Ga0212129_112044	0.254592	1.56157		Ga0212129_112044	0.189549	1.22408		Ga0212129_112044	0.151135	0.909187
Ga0212129_112046	0.00885256	0.0407217		Ga0212129_112046	-0.0678555	-0.299271		Ga0212129_112046	-0.3826	-1.58546			Ga0212129_112046	-0.284021	-1.47796		Ga0212129_112046	-0.206954	-1.05327		Ga0212129_112046	-0.0361802	-0.206156			Ga0212129_112046	-0.203905	-1.0661		Ga0212129_112046	-0.229983	-1.14509		Ga0212129_112046	-0.2083	-1.17161			Ga0212129_112046	-0.0826199	-0.421236		Ga0212129_112046	-0.143946	-0.737059		Ga0212129_112046	-0.185001	-0.975851
Ga0212129_112047	0.46214	1.90674		Ga0212129_112047	0.267599	1.16302		Ga0212129_112047	0.256012	1.06673			Ga0212129_112047	0.252247	1.41909		Ga0212129_112047	0.171112	0.965872		Ga0212129_112047	0.341208	2.02173			Ga0212129_112047	0.30819	1.80566		Ga0212129_112047	0.34385	1.99802		Ga0212129_112047	0.331755	1.94246			Ga0212129_112047	0.311366	1.8354		Ga0212129_112047	0.258249	1.50061		Ga0212129_112047	0.206539	1.19309
Ga0212129_112048	-0.0890188	-0.474571		Ga0212129_112048	0.115698	0.533786		Ga0212129_112048	-0.17776	-0.982757			Ga0212129_112048	-0.326627	-2.06489		Ga0212129_112048	-0.100747	-0.683788		Ga0212129_112048	-0.217318	-1.37133			Ga0212129_112048	-0.256478	-1.63914		Ga0212129_112048	-0.251005	-1.70786		Ga0212129_112048	-0.211909	-1.31317			Ga0212129_112048	-0.150251	-0.884718		Ga0212129_112048	-0.202549	-1.26074		Ga0212129_112048	-0.191771	-1.21716
Ga0212129_112049	0.249607	1.19928		Ga0212129_112049	0.113908	0.477611		Ga0212129_112049	-0.017938	-0.0831892			Ga0212129_112049	0.331206	1.89835		Ga0212129_112049	0.287409	1.57049		Ga0212129_112049	0.39149	2.16443			Ga0212129_112049	0.296986	1.54253		Ga0212129_112049	0.316718	1.67881		Ga0212129_112049	0.227005	1.3145			Ga0212129_112049	0.213633	1.13512		Ga0212129_112049	0.182362	1.00861		Ga0212129_112049	0.0944494	0.532302
Ga0212129_11205	-0.00489244	-0.0201405		Ga0212129_11205	-0.305005	-1.14635		Ga0212129_11205	-0.0817291	-0.32939			Ga0212129_11205	0.0964142	0.496857		Ga0212129_11205	0.0500456	0.236333		Ga0212129_11205	-0.0469	-0.229447			Ga0212129_11205	0.0597114	0.318981		Ga0212129_11205	0.312317	1.66702		Ga0212129_11205	0.111737	0.586388			Ga0212129_11205	0.0143383	0.0721531		Ga0212129_11205	0.00311288	0.0157398		Ga0212129_11205	0.013713	0.0691939
Ga0212129_112051	-0.296179	-1.51103		Ga0212129_112051	0.00828558	0.0356562		Ga0212129_112051	-0.0232869	-0.101785			Ga0212129_112051	-0.0225243	-0.124331		Ga0212129_112051	-0.161287	-0.990722		Ga0212129_112051	-0.125498	-0.738935			Ga0212129_112051	-0.181633	-1.03588		Ga0212129_112051	-0.235877	-1.55329		Ga0212129_112051	-0.126551	-0.724566			Ga0212129_112051	-0.179601	-1.05873		Ga0212129_112051	-0.228062	-1.38211		Ga0212129_112051	-0.0381971	-0.230656
Ga0212129_112052	0.34022	0.885826		Ga0212129_112052	-0.329487	-0.747209		Ga0212129_112052	0.251144	0.721439			Ga0212129_112052	0.24392	0.680021		Ga0212129_112052	0.17385	0.529265		Ga0212129_112052	0.478462	1.50086			Ga0212129_112052	0.1517	0.393163		Ga0212129_112052	0.382569	1.05191		Ga0212129_112052	0.185274	0.539934			Ga0212129_112052	0.574885	1.48966		Ga0212129_112052	0.418035	1.25684		Ga0212129_112052	0.318046	0.895236
Ga0212129_112053	0.0235339	0.0947033		Ga0212129_112053	0.0305291	0.12198		Ga0212129_112053	0.416239	1.36738			Ga0212129_112053	0.022952	0.115011		Ga0212129_112053	0.108893	0.518132		Ga0212129_112053	0.120607	0.590283			Ga0212129_112053	0.0361036	0.175569		Ga0212129_112053	0.115098	0.565998		Ga0212129_112053	0.0937277	0.495947			Ga0212129_112053	0.270598	1.40946		Ga0212129_112053	0.107783	0.577494		Ga0212129_112053	0.159961	0.727765
Ga0212129_112054	0.0622236	0.352086		Ga0212129_112054	0.171013	0.971611		Ga0212129_112054	0.0486139	0.316556			Ga0212129_112054	0.0834111	0.543579		Ga0212129_112054	0.119139	0.753883		Ga0212129_112054	0.0398557	0.242023			Ga0212129_112054	0.0974403	0.617012		Ga0212129_112054	0.133356	0.825341		Ga0212129_112054	0.0860574	0.524599			Ga0212129_112054	0.02597	0.169516		Ga0212129_112054	0.0384406	0.254126		Ga0212129_112054	0.0329503	0.211602
Ga0212129_112055	-0.0657271	-0.284768		Ga0212129_112055	-0.222984	-1.01309		Ga0212129_112055	-0.368891	-1.60418			Ga0212129_112055	-0.231891	-1.19913		Ga0212129_112055	-0.301995	-1.48241		Ga0212129_112055	-0.0614982	-0.324504			Ga0212129_112055	-0.124774	-0.650753		Ga0212129_112055	-0.25273	-1.38502		Ga0212129_112055	-0.125245	-0.66217			Ga0212129_112055	-0.047343	-0.245966		Ga0212129_112055	-0.346288	-1.69572		Ga0212129_112055	-0.0833146	-0.443508
Ga0212129_112056	0.0976311	0.288755		Ga0212129_112056	0.0330917	0.114863		Ga0212129_112056	0.106188	0.402812			Ga0212129_112056	-0.19538	-0.646233		Ga0212129_112056	-0.190604	-0.745426		Ga0212129_112056	-0.480494	-1.9846			Ga0212129_112056	-0.139862	-0.651399		Ga0212129_112056	-0.140372	-0.555957		Ga0212129_112056	-0.309222	-1.26302			Ga0212129_112056	-0.196014	-0.786874		Ga0212129_112056	-0.235482	-0.861684		Ga0212129_112056	-0.453614	-1.99923
Ga0212129_112057	-1.24894	-3.46825		Ga0212129_112057	-0.968757	-2.24436		Ga0212129_112057	-2.25044	-4.33167			Ga0212129_112057	-1.52243	-4.85389		Ga0212129_112057	-1.48922	-5.18568		Ga0212129_112057	-1.6314	-5.64491			Ga0212129_112057	-1.47787	-5.41677		Ga0212129_112057	-1.2231	-4.58283		Ga0212129_112057	-1.62016	-5.57613			Ga0212129_112057	-1.35649	-4.56469		Ga0212129_112057	-1.52591	-4.67403		Ga0212129_112057	-1.67408	-6.36401
Ga0212129_112058	-0.730986	-2.68261		Ga0212129_112058	-1.28783	-3.65695		Ga0212129_112058	-1.52635	-4.35005			Ga0212129_112058	-1.40241	-5.99267		Ga0212129_112058	-0.977053	-4.53993		Ga0212129_112058	-1.52858	-5.29299			Ga0212129_112058	-1.09268	-4.94843		Ga0212129_112058	-0.985698	-4.10626		Ga0212129_112058	-1.32	-5.78433			Ga0212129_112058	-1.04696	-4.34239		Ga0212129_112058	-1.25471	-4.83503		Ga0212129_112058	-1.29623	-5.58522
Ga0212129_11206	-0.320118	-2.27838		Ga0212129_11206	-0.1076	-0.674172		Ga0212129_11206	-0.320583	-2.0481			Ga0212129_11206	-0.3311	-2.64886		Ga0212129_11206	-0.208844	-1.65956		Ga0212129_11206	-0.216793	-1.64152			Ga0212129_11206	-0.364769	-2.79029		Ga0212129_11206	-0.268522	-2.07207		Ga0212129_11206	-0.354992	-2.75118			Ga0212129_11206	-0.27612	-2.12565		Ga0212129_11206	-0.279132	-2.22904		Ga0212129_11206	-0.2423	-1.95564
Ga0212129_112061	-1.595	-4.31715		Ga0212129_112061	-0.496151	-1.06966		Ga0212129_112061	-0.916368	-2.83436			Ga0212129_112061	-1.2518	-5.03252		Ga0212129_112061	-1.04899	-4.47187		Ga0212129_112061	-1.12419	-4.35583			Ga0212129_112061	-1.10916	-4.30154		Ga0212129_112061	-1.15773	-4.64339		Ga0212129_112061	-1.36321	-5.50286			Ga0212129_112061	-1.20388	-4.99909		Ga0212129_112061	-1.51294	-5.00957		Ga0212129_112061	-0.938537	-3.92391
Ga0212129_112066	-0.347816	-0.705014		Ga0212129_112066	-0.349181	-0.584507		Ga0212129_112066	-0.135821	-0.188886			Ga0212129_112066	-0.907932	-2.08403		Ga0212129_112066	-0.939349	-2.71542		Ga0212129_112066	-0.984379	-2.80045			Ga0212129_112066	-0.993788	-2.87689		Ga0212129_112066	-1.00096	-2.64702		Ga0212129_112066	-0.791693	-1.96419			Ga0212129_112066	-1.04279	-2.75018		Ga0212129_112066	-0.812157	-2.04449		Ga0212129_112066	-1.04137	-2.16711
Ga0212129_112067	-0.215803	-0.742967		Ga0212129_112067	-0.125021	-0.463549		Ga0212129_112067	-0.0802676	-0.31543			Ga0212129_112067	-0.226756	-0.881046		Ga0212129_112067	-0.0907414	-0.357776		Ga0212129_112067	-0.116255	-0.397638			Ga0212129_112067	-0.186035	-0.733698		Ga0212129_112067	-0.166444	-0.584649		Ga0212129_112067	-0.196285	-0.648805			Ga0212129_112067	-0.186359	-0.778557		Ga0212129_112067	-0.162256	-0.616797		Ga0212129_112067	-0.0891645	-0.311798
Ga0212129_112068	-0.260302	-1.27656		Ga0212129_112068	-0.14887	-0.682628		Ga0212129_112068	-0.0402853	-0.166635			Ga0212129_112068	-0.223962	-1.19032		Ga0212129_112068	-0.198834	-1.05793		Ga0212129_112068	-0.173015	-0.875944			Ga0212129_112068	-0.123588	-0.640245		Ga0212129_112068	-0.0191112	-0.100108		Ga0212129_112068	-0.20686	-1.12489			Ga0212129_112068	-0.254511	-1.23991		Ga0212129_112068	-0.234519	-1.19992		Ga0212129_112068	-0.198843	-1.01284
Ga0212129_112069	0.0605267	0.240384		Ga0212129_112069	-0.157804	-0.801722		Ga0212129_112069	0.394053	1.53802			Ga0212129_112069	-0.00200881	-0.00945741		Ga0212129_112069	0.00429958	0.0190823		Ga0212129_112069	-0.0199941	-0.0889661			Ga0212129_112069	0.0978106	0.483101		Ga0212129_112069	0.145282	0.670849		Ga0212129_112069	0.0151786	0.0773852			Ga0212129_112069	0.0504331	0.248053		Ga0212129_112069	0.101411	0.424196		Ga0212129_112069	0.112115	0.559431
Ga0212129_11207	-0.0606404	-0.492243		Ga0212129_11207	0.0238815	0.18487		Ga0212129_11207	-0.0681751	-0.542624			Ga0212129_11207	-0.0252022	-0.221648		Ga0212129_11207	0.00691403	0.0611567		Ga0212129_11207	-0.0260641	-0.224973			Ga0212129_11207	-0.0487735	-0.430711		Ga0212129_11207	-0.0296348	-0.254614		Ga0212129_11207	-0.0579548	-0.503984			Ga0212129_11207	-0.00837714	-0.0720138		Ga0212129_11207	-0.111356	-0.957977		Ga0212129_11207	-0.0556082	-0.485516
Ga0212129_112070	0.218373	0.813261		Ga0212129_112070	0.209943	0.784946		Ga0212129_112070	0.0976916	0.38726			Ga0212129_112070	0.0706156	0.373443		Ga0212129_112070	0.0499157	0.259972		Ga0212129_112070	-0.00849001	-0.0455265			Ga0212129_112070	0.18275	0.901878		Ga0212129_112070	-0.00780936	-0.0449099		Ga0212129_112070	0.0419457	0.200583			Ga0212129_112070	0.0309643	0.181351		Ga0212129_112070	-0.00547053	-0.0284287		Ga0212129_112070	0.00435811	0.0233149
Ga0212129_112071	0.00433647	0.0146325		Ga0212129_112071	-0.381316	-1.17884		Ga0212129_112071	-0.299005	-1.23992			Ga0212129_112071	0.0216582	0.101344		Ga0212129_112071	0.00155597	0.00692975		Ga0212129_112071	0.0780371	0.349724			Ga0212129_112071	0.18395	0.909547		Ga0212129_112071	0.0436934	0.208152		Ga0212129_112071	0.153273	0.677185			Ga0212129_112071	0.10962	0.507603		Ga0212129_112071	0.0605243	0.273047		Ga0212129_112071	0.0654448	0.332485
Ga0212129_112072	-0.334593	-1.34483		Ga0212129_112072	-0.354914	-1.20473		Ga0212129_112072	-0.0696695	-0.306436			Ga0212129_112072	-0.125017	-0.583128		Ga0212129_112072	-0.136349	-0.569131		Ga0212129_112072	-0.262943	-1.12207			Ga0212129_112072	-0.265435	-1.08721		Ga0212129_112072	-0.299505	-1.36245		Ga0212129_112072	-0.325322	-1.40781			Ga0212129_112072	-0.197259	-0.867431		Ga0212129_112072	-0.302358	-1.30658		Ga0212129_112072	-0.245128	-1.07568
Ga0212129_112073	0.138076	0.539456		Ga0212129_112073	0.373413	1.3224		Ga0212129_112073	0.320754	1.23886			Ga0212129_112073	-0.104445	-0.470887		Ga0212129_112073	0.261862	1.16746		Ga0212129_112073	0.167386	0.785545			Ga0212129_112073	0.0201129	0.0922411		Ga0212129_112073	0.310668	1.43608		Ga0212129_112073	0.311009	1.34233			Ga0212129_112073	0.388642	1.8317		Ga0212129_112073	0.273319	1.26676		Ga0212129_112073	0.232262	1.07153
Ga0212129_112074	-0.673302	-1.41319		Ga0212129_112074	-0.373815	-0.863189		Ga0212129_112074	-0.466746	-1.13828			Ga0212129_112074	-0.361956	-1.30751		Ga0212129_112074	-0.530692	-1.66919		Ga0212129_112074	-0.53504	-1.6627			Ga0212129_112074	-0.484004	-1.24439		Ga0212129_112074	-0.455184	-1.67963		Ga0212129_112074	-0.502748	-1.45682			Ga0212129_112074	-0.417894	-1.37225		Ga0212129_112074	-0.574978	-2.34552		Ga0212129_112074	-0.646176	-1.7177
Ga0212129_112076	-0.028577	-0.0740517		Ga0212129_112076	0.216547	0.486542		Ga0212129_112076	-0.090647	-0.2519			Ga0212129_112076	-0.136415	-0.548171		Ga0212129_112076	-0.0909628	-0.32057		Ga0212129_112076	-0.141763	-0.561668			Ga0212129_112076	-0.133896	-0.505833		Ga0212129_112076	-0.223979	-0.758284		Ga0212129_112076	-0.162699	-0.631712			Ga0212129_112076	-0.048761	-0.133118		Ga0212129_112076	-0.144492	-0.521453		Ga0212129_112076	-0.141893	-0.524633
Ga0212129_112077	-0.275508	-1.16041		Ga0212129_112077	-0.561783	-2.30244		Ga0212129_112077	-0.309987	-1.35577			Ga0212129_112077	-0.0836093	-0.463024		Ga0212129_112077	-0.0645999	-0.344717		Ga0212129_112077	-0.0528928	-0.276633			Ga0212129_112077	-0.179197	-0.852157		Ga0212129_112077	-0.0667146	-0.354127		Ga0212129_112077	-0.097791	-0.510675			Ga0212129_112077	-0.043413	-0.221092		Ga0212129_112077	-0.0565679	-0.282639		Ga0212129_112077	-0.126406	-0.632501
Ga0212129_112078	0.0383045	0.204803		Ga0212129_112078	0.103637	0.446824		Ga0212129_112078	-0.0410587	-0.178267			Ga0212129_112078	0.155986	0.896694		Ga0212129_112078	0.146472	0.813483		Ga0212129_112078	0.091308	0.548184			Ga0212129_112078	0.0990774	0.585958		Ga0212129_112078	0.0147285	0.0761676		Ga0212129_112078	0.170586	1.04289			Ga0212129_112078	0.189097	1.08422		Ga0212129_112078	0.0086471	0.0487874		Ga0212129_112078	0.0972412	0.583318
Ga0212129_112079	-0.735254	-2.40411		Ga0212129_112079	-0.412905	-0.927059		Ga0212129_112079	-0.272439	-0.888258			Ga0212129_112079	-0.601592	-2.49839		Ga0212129_112079	-0.483467	-1.88055		Ga0212129_112079	-0.542503	-1.77968			Ga0212129_112079	-0.466851	-1.50741		Ga0212129_112079	-0.384975	-1.41285		Ga0212129_112079	-0.194717	-0.868045			Ga0212129_112079	-0.781247	-2.19132		Ga0212129_112079	-0.848967	-3.23		Ga0212129_112079	-0.563647	-1.91383
Ga0212129_11208	-0.588345	-2.66285		Ga0212129_11208	0.0154024	0.0779694		Ga0212129_11208	-0.214958	-0.937798			Ga0212129_11208	-0.230077	-1.40001		Ga0212129_11208	-0.285985	-1.55577		Ga0212129_11208	-0.367066	-1.87732			Ga0212129_11208	-0.251103	-1.40677		Ga0212129_11208	-0.252443	-1.3876		Ga0212129_11208	-0.281594	-1.71236			Ga0212129_11208	-0.184172	-1.03135		Ga0212129_11208	-0.299133	-1.67856		Ga0212129_11208	-0.348704	-1.89198
Ga0212129_112080	0.0683988	0.200375		Ga0212129_112080	-0.621308	-1.70607		Ga0212129_112080	-0.0201837	-0.0662047			Ga0212129_112080	0.211076	0.990741		Ga0212129_112080	0.107165	0.44113		Ga0212129_112080	-0.0760803	-0.324748			Ga0212129_112080	0.122663	0.449285		Ga0212129_112080	0.122014	0.507499		Ga0212129_112080	-0.0402098	-0.120726			Ga0212129_112080	-0.0932869	-0.309432		Ga0212129_112080	-0.0102596	-0.0398281		Ga0212129_112080	0.0964807	0.305264
Ga0212129_112081	0.391998	1.48462		Ga0212129_112081	-0.293571	-0.93845		Ga0212129_112081	0.265772	0.979342			Ga0212129_112081	0.427293	1.93611		Ga0212129_112081	0.280765	1.27952		Ga0212129_112081	0.53375	2.45037			Ga0212129_112081	0.536054	2.45473		Ga0212129_112081	0.392721	1.76907		Ga0212129_112081	0.216746	0.988047			Ga0212129_112081	0.357909	1.63015		Ga0212129_112081	0.459337	2.08264		Ga0212129_112081	0.650869	2.9759
Ga0212129_112082	0.182968	0.693957		Ga0212129_112082	0.931335	2.56164		Ga0212129_112082	0.509882	1.80125			Ga0212129_112082	0.214186	0.955961		Ga0212129_112082	0.503865	2.28417		Ga0212129_112082	0.493493	2.17623			Ga0212129_112082	0.312443	1.32084		Ga0212129_112082	0.537619	2.43988		Ga0212129_112082	0.573129	2.66005			Ga0212129_112082	0.277944	1.2614		Ga0212129_112082	0.65389	2.90327		Ga0212129_112082	0.530783	2.41614
Ga0212129_112083	0.184593	0.694981		Ga0212129_112083	0.127057	0.46533		Ga0212129_112083	0.086308	0.258263			Ga0212129_112083	0.0722297	0.279238		Ga0212129_112083	0.106877	0.391455		Ga0212129_112083	0.0846107	0.296598			Ga0212129_112083	0.123194	0.465925		Ga0212129_112083	-0.346574	-1.23111		Ga0212129_112083	0.0253199	0.0972283			Ga0212129_112083	-0.0654857	-0.236474		Ga0212129_112083	0.0906377	0.353878		Ga0212129_112083	0.140465	0.631007
Ga0212129_112084	-0.572593	-2.65844		Ga0212129_112084	-0.0447999	-0.207121		Ga0212129_112084	-0.0768335	-0.38926			Ga0212129_112084	-0.130651	-0.765945		Ga0212129_112084	-0.0709289	-0.466794		Ga0212129_112084	-0.0322565	-0.192127			Ga0212129_112084	-0.215033	-1.13982		Ga0212129_112084	-0.262217	-1.36858		Ga0212129_112084	-0.107223	-0.577104			Ga0212129_112084	-0.209245	-1.07841		Ga0212129_112084	-0.356277	-2.33984		Ga0212129_112084	-0.130945	-0.75891
Ga0212129_112085	-0.857004	-2.06704		Ga0212129_112085	-0.232233	-0.695277		Ga0212129_112085	-0.383593	-1.12343			Ga0212129_112085	-0.0940525	-0.375765		Ga0212129_112085	-0.10433	-0.373246		Ga0212129_112085	-0.233387	-0.844112			Ga0212129_112085	-0.263027	-0.927629		Ga0212129_112085	-0.168492	-0.702191		Ga0212129_112085	-0.386276	-1.50898			Ga0212129_112085	-0.141116	-0.52781		Ga0212129_112085	-0.294884	-0.992436		Ga0212129_112085	-0.189599	-0.680371
Ga0212129_112086	0.0293983	0.0641899		Ga0212129_112086	0.361497	0.984102		Ga0212129_112086	0.403275	0.787366			Ga0212129_112086	0.124687	0.481594		Ga0212129_112086	-0.0352809	-0.110116		Ga0212129_112086	-0.0704304	-0.274527			Ga0212129_112086	-0.0457853	-0.15696		Ga0212129_112086	-0.0505058	-0.191908		Ga0212129_112086	0.0909767	0.303048			Ga0212129_112086	-0.244358	-0.78572		Ga0212129_112086	-0.289479	-1.00013		Ga0212129_112086	-0.214099	-0.804087
Ga0212129_112087	-0.112037	-0.490691		Ga0212129_112087	0.38238	1.29922		Ga0212129_112087	0.135493	0.461774			Ga0212129_112087	0.202131	0.870428		Ga0212129_112087	0.169272	0.776864		Ga0212129_112087	0.00699255	0.032697			Ga0212129_112087	0.0499348	0.212301		Ga0212129_112087	0.106953	0.483047		Ga0212129_112087	-0.0042811	-0.0202411			Ga0212129_112087	0.113021	0.473068		Ga0212129_112087	0.0918712	0.460051		Ga0212129_112087	0.105623	0.470698
Ga0212129_112088	0.0874164	0.236347		Ga0212129_112088	-0.492638	-1.19038		Ga0212129_112088	0.216706	0.457899			Ga0212129_112088	-0.0137909	-0.0438911		Ga0212129_112088	-0.113151	-0.34289		Ga0212129_112088	0.023027	0.0770064			Ga0212129_112088	-0.438549	-1.31424		Ga0212129_112088	-0.10157	-0.318436		Ga0212129_112088	-0.221879	-0.664871			Ga0212129_112088	-0.222496	-0.690676		Ga0212129_112088	-0.231674	-0.689295		Ga0212129_112088	-0.0848919	-0.287497
Ga0212129_112089	0.100921	0.35144		Ga0212129_112089	-0.0543769	-0.197374		Ga0212129_112089	0.171591	0.6044			Ga0212129_112089	0.120051	0.621047		Ga0212129_112089	0.0173855	0.081403		Ga0212129_112089	0.161873	0.756991			Ga0212129_112089	0.130736	0.671757		Ga0212129_112089	-0.138361	-0.626661		Ga0212129_112089	0.156334	0.733805			Ga0212129_112089	0.104645	0.486492		Ga0212129_112089	0.11963	0.574189		Ga0212129_112089	0.0308008	0.156079
Ga0212129_11209	-0.325251	-1.65369		Ga0212129_11209	0.158458	0.731388		Ga0212129_11209	0.107277	0.527867			Ga0212129_11209	0.0891836	0.468727		Ga0212129_11209	0.134363	0.778005		Ga0212129_11209	-0.0930854	-0.544558			Ga0212129_11209	0.0383697	0.21392		Ga0212129_11209	-0.0114712	-0.0642272		Ga0212129_11209	-0.0123607	-0.0659965			Ga0212129_11209	0.0170804	0.101275		Ga0212129_11209	-0.232339	-1.23965		Ga0212129_11209	-0.101274	-0.561454
Ga0212129_112090	-0.258742	-1.01209		Ga0212129_112090	-0.21335	-0.742704		Ga0212129_112090	-0.274256	-0.925599			Ga0212129_112090	-0.106018	-0.46961		Ga0212129_112090	-0.34811	-1.61039		Ga0212129_112090	-0.246922	-1.07082			Ga0212129_112090	-0.292638	-1.235		Ga0212129_112090	-0.255041	-1.2136		Ga0212129_112090	-0.321094	-1.56216			Ga0212129_112090	-0.0367753	-0.199185		Ga0212129_112090	-0.207064	-0.914158		Ga0212129_112090	-0.331055	-1.49152
Ga0212129_112091	-0.0268979	-0.113012		Ga0212129_112091	0.205065	0.945272		Ga0212129_112091	0.104851	0.48199			Ga0212129_112091	-0.0725644	-0.401418		Ga0212129_112091	0.0145143	0.0837187		Ga0212129_112091	-0.0193451	-0.111726			Ga0212129_112091	0.0474654	0.271996		Ga0212129_112091	-0.00728894	-0.0401001		Ga0212129_112091	-0.0236184	-0.136297			Ga0212129_112091	-0.046406	-0.266076		Ga0212129_112091	-0.0144628	-0.0816985		Ga0212129_112091	0.232708	1.33477
Ga0212129_112092	0.120614	0.43761		Ga0212129_112092	-0.154007	-0.579292		Ga0212129_112092	0.335264	1.33817			Ga0212129_112092	-0.0195485	-0.0998546		Ga0212129_112092	-0.0793961	-0.385093		Ga0212129_112092	-0.173056	-0.821395			Ga0212129_112092	-0.112712	-0.501535		Ga0212129_112092	-0.15442	-0.672005		Ga0212129_112092	-0.0909189	-0.402183			Ga0212129_112092	-0.101817	-0.443278		Ga0212129_112092	-0.22963	-1.09404		Ga0212129_112092	-0.0190977	-0.106839
Ga0212129_112094	0.03461	0.109845		Ga0212129_112094	-0.55967	-1.39783		Ga0212129_112094	0.287523	0.675425			Ga0212129_112094	0.00425036	0.0175142		Ga0212129_112094	0.0875974	0.369374		Ga0212129_112094	0.117374	0.469683			Ga0212129_112094	-0.0476987	-0.196412		Ga0212129_112094	0.160214	0.562343		Ga0212129_112094	-0.118248	-0.493622			Ga0212129_112094	-0.0703015	-0.244272		Ga0212129_112094	0.0925871	0.382549		Ga0212129_112094	0.117864	0.487623
Ga0212129_112097	0.52129	1.72068		Ga0212129_112097	1.0722	4.0537		Ga0212129_112097	0.33843	0.984499			Ga0212129_112097	0.370957	1.48432		Ga0212129_112097	0.696952	2.36441		Ga0212129_112097	0.491755	1.50834			Ga0212129_112097	0.393583	1.3282		Ga0212129_112097	0.586602	2.07266		Ga0212129_112097	0.426932	1.51726			Ga0212129_112097	0.459213	1.44811		Ga0212129_112097	0.196972	0.736212		Ga0212129_112097	0.616967	2.48909
Ga0212129_11210	0.0105992	0.0565817		Ga0212129_11210	-0.303635	-1.29918		Ga0212129_11210	-0.437164	-2.00216			Ga0212129_11210	-0.120648	-0.758332		Ga0212129_11210	-0.0302162	-0.181968		Ga0212129_11210	-0.132525	-0.713573			Ga0212129_11210	-0.196654	-1.12753		Ga0212129_11210	-0.229558	-1.3415		Ga0212129_11210	-0.0335932	-0.185475			Ga0212129_11210	-0.108847	-0.650064		Ga0212129_11210	-0.0772463	-0.442552		Ga0212129_11210	-0.0511943	-0.302518
Ga0212129_112100	-0.741836	-1.03186		Ga0212129_112100	-0.842313	-1.09496		Ga0212129_112100	-0.116892	-0.228534			Ga0212129_112100	-0.428832	-1.17243		Ga0212129_112100	-0.192349	-0.601787		Ga0212129_112100	-0.581555	-1.31028			Ga0212129_112100	-0.522961	-1.18798		Ga0212129_112100	-0.404641	-1.06685		Ga0212129_112100	-0.592216	-1.52473			Ga0212129_112100	-0.663583	-1.81177		Ga0212129_112100	-0.389616	-0.922933		Ga0212129_112100	-0.362411	-0.854565
Ga0212129_112101	-1.56441	-2.88208		Ga0212129_112101	-1.95603	-3.99822		Ga0212129_112101	-2.23254	-4.23097			Ga0212129_112101	-1.36611	-4.74034		Ga0212129_112101	-0.939033	-3.59033		Ga0212129_112101	-1.74462	-5.98363			Ga0212129_112101	-1.09394	-4.00644		Ga0212129_112101	-1.25638	-4.40662		Ga0212129_112101	-1.05437	-4.00496			Ga0212129_112101	-1.07974	-4.00004		Ga0212129_112101	-1.22182	-4.3		Ga0212129_112101	-0.961207	-3.51173
Ga0212129_112105	0.180345	0.377633		Ga0212129_112105	0.926208	3.54717		Ga0212129_112105	-0.0355421	-0.0852895			Ga0212129_112105	0.102664	0.413807		Ga0212129_112105	0.290515	0.856503		Ga0212129_112105	0.363386	1.28093			Ga0212129_112105	0.314219	1.2542		Ga0212129_112105	0.331259	0.978956		Ga0212129_112105	0.302309	1.19306			Ga0212129_112105	0.343064	1.39671		Ga0212129_112105	0.130885	0.418134		Ga0212129_112105	0.24351	0.721545
Ga0212129_112107	-0.35604	-1.41188		Ga0212129_112107	-0.330997	-0.998703		Ga0212129_112107	0.116713	0.548474			Ga0212129_112107	-0.151652	-0.679343		Ga0212129_112107	0.0559652	0.293798		Ga0212129_112107	-0.0517218	-0.242511			Ga0212129_112107	0.00665291	0.037543		Ga0212129_112107	-0.0682706	-0.319566		Ga0212129_112107	-0.0629403	-0.325415			Ga0212129_112107	-0.0414465	-0.185819		Ga0212129_112107	0.0257549	0.117827		Ga0212129_112107	-0.00836032	-0.0390303
Ga0212129_112108	-0.328923	-0.930916		Ga0212129_112108	-0.183852	-0.429831		Ga0212129_112108	-0.18244	-0.657221			Ga0212129_112108	0.127069	0.550666		Ga0212129_112108	0.203637	0.909878		Ga0212129_112108	0.190343	0.880149			Ga0212129_112108	0.059365	0.263529		Ga0212129_112108	0.143079	0.60278		Ga0212129_112108	-0.0358596	-0.142149			Ga0212129_112108	0.136007	0.551971		Ga0212129_112108	0.115841	0.4927		Ga0212129_112108	0.0549228	0.223901
Ga0212129_112109	-0.46485	-0.945796		Ga0212129_112109	-0.0423667	-0.0879957		Ga0212129_112109	-0.0638594	-0.139276			Ga0212129_112109	-0.0292818	-0.0655711		Ga0212129_112109	-0.0954228	-0.259779		Ga0212129_112109	0.220439	0.613633			Ga0212129_112109	0.121481	0.284351		Ga0212129_112109	0.0571822	0.202784		Ga0212129_112109	0.0240607	0.070576			Ga0212129_112109	-0.327157	-0.799431		Ga0212129_112109	0.171524	0.336986		Ga0212129_112109	-0.181012	-0.503591
Ga0212129_11212	0.454812	1.14435		Ga0212129_11212	0.370101	0.608018		Ga0212129_11212	-0.825247	-1.75251			Ga0212129_11212	0.428221	1.063		Ga0212129_11212	0.334538	0.85692		Ga0212129_11212	0.440188	0.847007			Ga0212129_11212	0.228719	0.533883		Ga0212129_11212	-0.0331249	-0.083173		Ga0212129_11212	0.320704	0.747654			Ga0212129_11212	0.463097	1.36625		Ga0212129_11212	0.391373	1.0404		Ga0212129_11212	0.225668	0.688615
Ga0212129_112126	-0.130242	-0.425895		Ga0212129_112126	0.232049	0.53583		Ga0212129_112126	0.260771	0.781193			Ga0212129_112126	0.0310894	0.0917876		Ga0212129_112126	0.173121	0.547437		Ga0212129_112126	0.0939116	0.25542			Ga0212129_112126	0.302948	1.12293		Ga0212129_112126	0.26858	0.723265		Ga0212129_112126	0.167342	0.513624			Ga0212129_112126	0.200683	0.589289		Ga0212129_112126	0.193842	0.613592		Ga0212129_112126	0.240973	0.704145
Ga0212129_112127	0.285873	1.78117		Ga0212129_112127	0.313629	1.83022		Ga0212129_112127	0.172568	0.950921			Ga0212129_112127	0.251795	1.83339		Ga0212129_112127	0.355007	2.46937		Ga0212129_112127	0.211053	1.56561			Ga0212129_112127	0.343281	2.40531		Ga0212129_112127	0.23497	1.71116		Ga0212129_112127	0.248252	1.80331			Ga0212129_112127	0.247548	1.80715		Ga0212129_112127	0.00441186	0.0321075		Ga0212129_112127	0.17749	1.24917
Ga0212129_112128	0.119754	0.355461		Ga0212129_112128	-0.171584	-0.464719		Ga0212129_112128	0.0709244	0.257916			Ga0212129_112128	0.412821	1.67524		Ga0212129_112128	0.313272	1.3631		Ga0212129_112128	0.201037	0.813414			Ga0212129_112128	0.317357	1.23205		Ga0212129_112128	0.344952	1.42767		Ga0212129_112128	0.33568	1.42332			Ga0212129_112128	0.381735	1.76202		Ga0212129_112128	0.0232414	0.0957782		Ga0212129_112128	-0.121502	-0.526697
Ga0212129_112129	-0.38091	-1.70482		Ga0212129_112129	-0.185622	-0.668871		Ga0212129_112129	-0.282144	-1.24113			Ga0212129_112129	-0.0988814	-0.550794		Ga0212129_112129	-0.0447574	-0.244129		Ga0212129_112129	-0.0542623	-0.291994			Ga0212129_112129	0.042735	0.251284		Ga0212129_112129	-0.0712425	-0.388438		Ga0212129_112129	-0.0402347	-0.194886			Ga0212129_112129	-0.0168404	-0.0945323		Ga0212129_112129	-0.123611	-0.624366		Ga0212129_112129	-0.155282	-0.852895
Ga0212129_112130	-0.377633	-1.89556		Ga0212129_112130	-0.0686199	-0.312004		Ga0212129_112130	-0.362829	-1.57485			Ga0212129_112130	-0.365695	-1.97091		Ga0212129_112130	-0.407544	-2.21706		Ga0212129_112130	-0.305602	-1.81112			Ga0212129_112130	-0.322792	-1.78511		Ga0212129_112130	-0.36769	-2.20408		Ga0212129_112130	-0.338062	-1.94257			Ga0212129_112130	-0.456608	-2.38557		Ga0212129_112130	-0.358806	-2.05143		Ga0212129_112130	-0.303961	-1.69152
Ga0212129_112131	-0.300098	-1.24264		Ga0212129_112131	0.328305	1.03013		Ga0212129_112131	-0.105342	-0.44434			Ga0212129_112131	0.0330369	0.176719		Ga0212129_112131	0.25888	1.3332		Ga0212129_112131	0.0107714	0.0488111			Ga0212129_112131	0.0219913	0.118137		Ga0212129_112131	0.0991596	0.498376		Ga0212129_112131	0.0242833	0.111008			Ga0212129_112131	-0.0774936	-0.390789		Ga0212129_112131	0.0395979	0.211577		Ga0212129_112131	0.133255	0.675552
Ga0212129_112132	-0.548818	-1.47362		Ga0212129_112132	-0.174622	-0.411607		Ga0212129_112132	-0.0647301	-0.152673			Ga0212129_112132	-0.235369	-0.75998		Ga0212129_112132	0.115077	0.364385		Ga0212129_112132	-0.00201552	-0.00511284			Ga0212129_112132	0.216591	0.704791		Ga0212129_112132	0.0316858	0.0882827		Ga0212129_112132	-0.205576	-0.706163			Ga0212129_112132	-0.140717	-0.40039		Ga0212129_112132	0.128314	0.354258		Ga0212129_112132	-0.0910998	-0.288578
Ga0212129_112137	0.422847	1.52025		Ga0212129_112137	0.16562	0.448351		Ga0212129_112137	0.503325	1.54409			Ga0212129_112137	0.267828	0.923645		Ga0212129_112137	0.344002	1.30932		Ga0212129_112137	0.153123	0.511055			Ga0212129_112137	0.0972084	0.344246		Ga0212129_112137	0.306744	1.19442		Ga0212129_112137	0.0742073	0.28494			Ga0212129_112137	0.0818944	0.340328		Ga0212129_112137	0.204912	0.789445		Ga0212129_112137	0.365105	1.3044
Ga0212129_112138	0.551977	2.44269		Ga0212129_112138	0.526113	1.96369		Ga0212129_112138	-0.216487	-0.834413			Ga0212129_112138	0.0800112	0.398121		Ga0212129_112138	0.0463181	0.232275		Ga0212129_112138	0.171341	0.746231			Ga0212129_112138	0.0518892	0.233048		Ga0212129_112138	0.0968719	0.404145		Ga0212129_112138	0.308296	1.49429			Ga0212129_112138	0.067445	0.338688		Ga0212129_112138	0.140818	0.664046		Ga0212129_112138	0.169414	0.846183
Ga0212129_112144	0.331625	0.720277		Ga0212129_112144	0.335937	0.848015		Ga0212129_112144	0.31051	0.76592			Ga0212129_112144	-0.113854	-0.352642		Ga0212129_112144	-0.146582	-0.447085		Ga0212129_112144	-0.113986	-0.389979			Ga0212129_112144	0.164497	0.476756		Ga0212129_112144	-0.0135769	-0.0401466		Ga0212129_112144	-0.0322243	-0.104763			Ga0212129_112144	0.119046	0.333114		Ga0212129_112144	-0.0697509	-0.235812		Ga0212129_112144	-0.183216	-0.611042
Ga0212129_112145	-0.835818	-2.17859		Ga0212129_112145	-0.511018	-1.2258		Ga0212129_112145	0.598023	2.07514			Ga0212129_112145	-0.506472	-1.66982		Ga0212129_112145	-0.352299	-1.14264		Ga0212129_112145	-0.259175	-0.768482			Ga0212129_112145	-0.384601	-1.52401		Ga0212129_112145	-0.397776	-1.28283		Ga0212129_112145	-0.168255	-0.631906			Ga0212129_112145	-0.0903485	-0.322837		Ga0212129_112145	-0.472481	-1.78973		Ga0212129_112145	-0.323586	-1.2434
Ga0212129_112146	-0.482426	-1.13321		Ga0212129_112146	-0.304	-0.505217		Ga0212129_112146	-1.09262	-1.73518			Ga0212129_112146	-1.09894	-2.46452		Ga0212129_112146	-0.806426	-1.47779		Ga0212129_112146	-0.713478	-1.51308			Ga0212129_112146	-0.597962	-1.54245		Ga0212129_112146	-0.910272	-2.31198		Ga0212129_112146	-0.624558	-1.44247			Ga0212129_112146	-1.08487	-2.57552		Ga0212129_112146	-0.74608	-1.93357		Ga0212129_112146	-0.891126	-2.09464
Ga0212129_112148	-0.293347	-1.17133		Ga0212129_112148	-0.0669004	-0.227529		Ga0212129_112148	-0.18062	-0.640511			Ga0212129_112148	-0.125758	-0.671629		Ga0212129_112148	0.0525909	0.288737		Ga0212129_112148	-0.111299	-0.570311			Ga0212129_112148	-0.161134	-0.861875		Ga0212129_112148	-0.122948	-0.620893		Ga0212129_112148	-0.193741	-0.867015			Ga0212129_112148	-0.0676414	-0.300245		Ga0212129_112148	-0.162053	-0.748673		Ga0212129_112148	0.00348348	0.0187695
Ga0212129_11215	0.0256168	0.135427		Ga0212129_11215	-0.493091	-1.8874		Ga0212129_11215	-0.422747	-2.12451			Ga0212129_11215	-0.145813	-0.862567		Ga0212129_11215	-0.316119	-1.63409		Ga0212129_11215	-0.403999	-2.04595			Ga0212129_11215	-0.172405	-0.919957		Ga0212129_11215	-0.318	-1.52625		Ga0212129_11215	-0.334936	-1.84767			Ga0212129_11215	-0.22295	-1.15363		Ga0212129_11215	-0.251806	-1.39801		Ga0212129_11215	-0.229173	-1.10653
Ga0212129_112151	-0.0497928	-0.0609162		Ga0212129_112151	-0.416374	-0.479954		Ga0212129_112151	-0.0232869	-0.0436187			Ga0212129_112151	-0.248043	-0.653964		Ga0212129_112151	-0.434141	-0.595531		Ga0212129_112151	-0.543358	-0.772157			Ga0212129_112151	-0.225118	-0.480763		Ga0212129_112151	-0.434851	-0.655508		Ga0212129_112151	-0.199589	-0.342871			Ga0212129_112151	-0.794534	-1.20735		Ga0212129_112151	-0.670226	-0.851946		Ga0212129_112151	-0.654979	-0.929694
Ga0212129_112152	-0.128547	-0.39436		Ga0212129_112152	0.170324	0.602021		Ga0212129_112152	0.0939174	0.338273			Ga0212129_112152	0.0356334	0.19327		Ga0212129_112152	0.0955104	0.555013		Ga0212129_112152	0.00993016	0.055244			Ga0212129_112152	-0.00955303	-0.0546154		Ga0212129_112152	0.0715728	0.40748		Ga0212129_112152	0.0140256	0.0807402			Ga0212129_112152	0.100609	0.466175		Ga0212129_112152	-0.0185297	-0.105371		Ga0212129_112152	0.160742	0.922504
Ga0212129_112153	0.0990873	0.439235		Ga0212129_112153	0.241807	0.987185		Ga0212129_112153	0.44136	2.25224			Ga0212129_112153	0.0457243	0.263493		Ga0212129_112153	0.239675	1.41676		Ga0212129_112153	0.241387	1.42906			Ga0212129_112153	0.326353	1.91795		Ga0212129_112153	0.183671	1.06393		Ga0212129_112153	0.253957	1.50443			Ga0212129_112153	0.210802	1.24078		Ga0212129_112153	0.213777	1.23452		Ga0212129_112153	0.187451	1.08898
Ga0212129_112158	-0.467358	-2.34966		Ga0212129_112158	-0.308918	-1.59704		Ga0212129_112158	-0.235915	-1.39523			Ga0212129_112158	-0.22514	-1.32363		Ga0212129_112158	-0.17058	-1.02207		Ga0212129_112158	-0.264062	-1.43267			Ga0212129_112158	-0.217477	-1.19755		Ga0212129_112158	-0.333432	-1.94493		Ga0212129_112158	-0.188376	-1.0576			Ga0212129_112158	-0.221194	-1.27636		Ga0212129_112158	-0.259701	-1.41499		Ga0212129_112158	-0.338259	-1.99753
Ga0212129_112159	-0.187739	-1.08445		Ga0212129_112159	-0.184797	-1.10332		Ga0212129_112159	-0.186209	-1.08448			Ga0212129_112159	-0.121345	-0.833163		Ga0212129_112159	-0.0857257	-0.589792		Ga0212129_112159	-0.132509	-0.898059			Ga0212129_112159	-0.187143	-1.25542		Ga0212129_112159	-0.144144	-1.00353		Ga0212129_112159	-0.158025	-1.03366			Ga0212129_112159	-0.0971157	-0.653697		Ga0212129_112159	-0.102831	-0.700316		Ga0212129_112159	-0.123383	-0.853558
Ga0212129_11216	0.106063	0.711224		Ga0212129_11216	0.0364616	0.228424		Ga0212129_11216	-0.17736	-1.1582			Ga0212129_11216	0.0546461	0.409776		Ga0212129_11216	-0.005707	-0.0398591		Ga0212129_11216	-0.0164446	-0.116632			Ga0212129_11216	-0.0219431	-0.156879		Ga0212129_11216	0.0320709	0.228971		Ga0212129_11216	0.0415476	0.306184			Ga0212129_11216	0.0466445	0.322033		Ga0212129_11216	0.00771756	0.0553336		Ga0212129_11216	-0.0707821	-0.501266
Ga0212129_112160	-0.205291	-0.655207		Ga0212129_112160	0.0187601	0.0586346		Ga0212129_112160	0.179821	0.706239			Ga0212129_112160	-0.0467963	-0.191034		Ga0212129_112160	-0.027852	-0.0990624		Ga0212129_112160	-0.0994034	-0.406581			Ga0212129_112160	0.0621869	0.248373		Ga0212129_112160	0.108605	0.443936		Ga0212129_112160	-0.0206042	-0.0921095			Ga0212129_112160	0.0310897	0.122018		Ga0212129_112160	-0.200093	-0.870663		Ga0212129_112160	-0.00244425	-0.0112931
Ga0212129_112161	0.0452818	0.286021		Ga0212129_112161	-0.00235012	-0.0132714		Ga0212129_112161	0.28043	1.78129			Ga0212129_112161	0.181761	1.26762		Ga0212129_112161	0.224072	1.53597		Ga0212129_112161	0.102868	0.723098			Ga0212129_112161	0.16599	1.15444		Ga0212129_112161	0.121546	0.885287		Ga0212129_112161	0.128028	0.884431			Ga0212129_112161	0.0431443	0.288286		Ga0212129_112161	0.0613481	0.43463		Ga0212129_112161	0.125246	0.884312
Ga0212129_112163	-1.61724	-5.02202		Ga0212129_112163	-3.05341	-7.10555		Ga0212129_112163	-2.02769	-6.02631			Ga0212129_112163	-1.30029	-5.38211		Ga0212129_112163	-1.38585	-6.87161		Ga0212129_112163	-2.2662	-10.5392			Ga0212129_112163	-1.53001	-7.18799		Ga0212129_112163	-2.32806	-9.51755		Ga0212129_112163	-2.59315	-9.04301			Ga0212129_112163	-1.74216	-7.09104		Ga0212129_112163	-2.61292	-10.0247		Ga0212129_112163	-2.77007	-10.4847
Ga0212129_112166	-0.029929	-0.133979		Ga0212129_112166	0.347339	1.59814		Ga0212129_112166	0.156473	0.640288			Ga0212129_112166	0.293339	1.64144		Ga0212129_112166	0.321938	1.74315		Ga0212129_112166	0.190691	0.960432			Ga0212129_112166	0.216901	1.16804		Ga0212129_112166	0.0332878	0.170355		Ga0212129_112166	0.209478	1.13052			Ga0212129_112166	0.273377	1.4302		Ga0212129_112166	0.124849	0.707852		Ga0212129_112166	0.192036	1.09512
Ga0212129_112167	0.155273	0.463964		Ga0212129_112167	0.0419447	0.126605		Ga0212129_112167	-0.0695986	-0.241476			Ga0212129_112167	-0.0504015	-0.20022		Ga0212129_112167	0.19885	0.798059		Ga0212129_112167	0.325608	1.67005			Ga0212129_112167	0.14921	0.546209		Ga0212129_112167	0.264538	1.29253		Ga0212129_112167	0.221048	1.09748			Ga0212129_112167	0.409723	2.00167		Ga0212129_112167	0.154413	0.806439		Ga0212129_112167	0.0638065	0.331083
Ga0212129_112168	0.130862	0.544339		Ga0212129_112168	0.189995	1.00525		Ga0212129_112168	0.141536	0.658056			Ga0212129_112168	0.160327	0.989682		Ga0212129_112168	0.255067	1.47632		Ga0212129_112168	0.174862	0.930632			Ga0212129_112168	0.237682	1.49089		Ga0212129_112168	0.144923	0.830031		Ga0212129_112168	0.21349	1.32109			Ga0212129_112168	0.0793757	0.442315		Ga0212129_112168	-0.0335472	-0.197672		Ga0212129_112168	0.0593432	0.336383
Ga0212129_112169	0.147438	0.535666		Ga0212129_112169	0.597463	1.9278		Ga0212129_112169	-0.100003	-0.384304			Ga0212129_112169	0.244161	1.07178		Ga0212129_112169	0.312129	1.40424		Ga0212129_112169	0.349443	1.52022			Ga0212129_112169	0.356524	1.79287		Ga0212129_112169	0.498069	2.39568		Ga0212129_112169	0.449718	2.30117			Ga0212129_112169	0.369032	1.85327		Ga0212129_112169	0.22269	1.06962		Ga0212129_112169	0.264626	1.31742
Ga0212129_11217	-0.0131495	-0.0706981		Ga0212129_11217	-0.229876	-1.25554		Ga0212129_11217	0.219226	1.20566			Ga0212129_11217	0.110661	0.657191		Ga0212129_11217	-0.0216218	-0.122891		Ga0212129_11217	0.0369295	0.220498			Ga0212129_11217	0.0433772	0.237452		Ga0212129_11217	-0.0394702	-0.226747		Ga0212129_11217	0.0340281	0.211938			Ga0212129_11217	-0.0478739	-0.277491		Ga0212129_11217	0.0395768	0.217383		Ga0212129_11217	0.0455769	0.28332
Ga0212129_112170	-0.0306446	-0.0867937		Ga0212129_112170	-0.145297	-0.3611		Ga0212129_112170	-0.340236	-1.00849			Ga0212129_112170	-0.225208	-0.912005		Ga0212129_112170	-0.265063	-0.864399		Ga0212129_112170	-0.321522	-1.00154			Ga0212129_112170	0.104619	0.416403		Ga0212129_112170	-0.12206	-0.497295		Ga0212129_112170	-0.111081	-0.404004			Ga0212129_112170	-0.133175	-0.477245		Ga0212129_112170	-0.294166	-1.02591		Ga0212129_112170	-0.17047	-0.728681
Ga0212129_112171	0.234824	1.4371		Ga0212129_112171	0.189433	1.18907		Ga0212129_112171	0.230842	1.5248			Ga0212129_112171	0.273659	1.94269		Ga0212129_112171	0.267399	1.85427		Ga0212129_112171	0.368675	2.56326			Ga0212129_112171	0.238289	1.70194		Ga0212129_112171	0.261193	1.84681		Ga0212129_112171	0.278975	1.89537			Ga0212129_112171	0.274358	1.94648		Ga0212129_112171	0.232181	1.70382		Ga0212129_112171	0.190803	1.30445
Ga0212129_112172	-0.370105	-1.24632		Ga0212129_112172	-0.0920533	-0.234872		Ga0212129_112172	0.0571733	0.186768			Ga0212129_112172	-0.191361	-0.732698		Ga0212129_112172	-0.261871	-0.961819		Ga0212129_112172	-0.312607	-0.972637			Ga0212129_112172	-0.323972	-1.20666		Ga0212129_112172	-0.176282	-0.621232		Ga0212129_112172	-0.180016	-0.709925			Ga0212129_112172	-0.0162751	-0.0542991		Ga0212129_112172	-0.267085	-0.866473		Ga0212129_112172	-0.322793	-1.09123
Ga0212129_112173	-0.139565	-0.641923		Ga0212129_112173	0.269882	1.2256		Ga0212129_112173	0.17549	0.718283			Ga0212129_112173	-0.00125292	-0.00702877		Ga0212129_112173	0.0920727	0.475656		Ga0212129_112173	-0.0248483	-0.133501			Ga0212129_112173	0.0554745	0.292396		Ga0212129_112173	-0.0404811	-0.225558		Ga0212129_112173	0.0767414	0.385616			Ga0212129_112173	0.108773	0.59122		Ga0212129_112173	0.0170117	0.0871019		Ga0212129_112173	0.0193363	0.106751
Ga0212129_112174	0.266243	1.73416		Ga0212129_112174	0.0914523	0.571015		Ga0212129_112174	0.00280228	0.0163775			Ga0212129_112174	0.0928971	0.654416		Ga0212129_112174	0.0716509	0.459748		Ga0212129_112174	0.0288432	0.186827			Ga0212129_112174	0.121596	0.794841		Ga0212129_112174	0.118464	0.817912		Ga0212129_112174	0.0860703	0.584729			Ga0212129_112174	0.154635	1.00425		Ga0212129_112174	0.077343	0.529485		Ga0212129_112174	0.108071	0.769731
Ga0212129_112175	0.204863	1.17663		Ga0212129_112175	0.332872	1.73857		Ga0212129_112175	0.106674	0.585928			Ga0212129_112175	0.225762	1.60722		Ga0212129_112175	0.2987	1.89016		Ga0212129_112175	0.377954	2.45637			Ga0212129_112175	0.313722	2.15328		Ga0212129_112175	0.254854	1.6751		Ga0212129_112175	0.330008	2.31786			Ga0212129_112175	0.321105	2.10988		Ga0212129_112175	0.269237	1.8124		Ga0212129_112175	0.19769	1.30752
Ga0212129_112176	-0.148701	-0.563384		Ga0212129_112176	-0.386778	-1.58545		Ga0212129_112176	0.118813	0.523066			Ga0212129_112176	-0.22045	-1.09677		Ga0212129_112176	-0.177081	-0.874873		Ga0212129_112176	-0.21689	-1.13817			Ga0212129_112176	-0.105458	-0.527766		Ga0212129_112176	-0.14124	-0.726656		Ga0212129_112176	-0.270906	-1.3709			Ga0212129_112176	-0.114616	-0.602638		Ga0212129_112176	-0.196116	-0.994407		Ga0212129_112176	-0.254289	-1.251
Ga0212129_112177	-0.350627	-1.05518		Ga0212129_112177	-0.417966	-0.774196		Ga0212129_112177	-0.481082	-1.13572			Ga0212129_112177	-0.343291	-1.40824		Ga0212129_112177	-0.569159	-2.08902		Ga0212129_112177	-0.471262	-1.96656			Ga0212129_112177	-0.646561	-2.59532		Ga0212129_112177	-0.580672	-1.59081		Ga0212129_112177	-0.408038	-1.71759			Ga0212129_112177	-0.106437	-0.452815		Ga0212129_112177	-0.361413	-1.29202		Ga0212129_112177	-0.528256	-2.02123
Ga0212129_112178	-1.18045	-2.48393		Ga0212129_112178	0.00412606	0.0124253		Ga0212129_112178	-0.697249	-1.94422			Ga0212129_112178	-0.250308	-0.759741		Ga0212129_112178	-0.0231609	-0.0641999		Ga0212129_112178	-0.432471	-1.46944			Ga0212129_112178	0.0128723	0.0334049		Ga0212129_112178	0.0628935	0.240547		Ga0212129_112178	-0.391682	-1.21684			Ga0212129_112178	-0.055632	-0.144393		Ga0212129_112178	-0.210507	-0.643292		Ga0212129_112178	-0.348537	-1.28566
Ga0212129_112179	-0.0206756	-0.101147		Ga0212129_112179	0.269786	1.24318		Ga0212129_112179	0.276786	1.26113			Ga0212129_112179	0.397837	2.39836		Ga0212129_112179	0.31673	1.87264		Ga0212129_112179	0.283189	1.62178			Ga0212129_112179	0.387252	2.26684		Ga0212129_112179	0.203802	1.17807		Ga0212129_112179	0.388059	2.15953			Ga0212129_112179	0.288488	1.63299		Ga0212129_112179	0.198753	1.0415		Ga0212129_112179	0.190603	1.14496
Ga0212129_11218	-0.214108	-1.25107		Ga0212129_11218	-0.302136	-1.69944		Ga0212129_11218	-0.261814	-1.573			Ga0212129_11218	-0.0540358	-0.389026		Ga0212129_11218	-0.130011	-0.927746		Ga0212129_11218	-0.137888	-1.01409			Ga0212129_11218	-0.138464	-0.996778		Ga0212129_11218	-0.186607	-1.31197		Ga0212129_11218	-0.183952	-1.29996			Ga0212129_11218	-0.131102	-0.932313		Ga0212129_11218	-0.247857	-1.70414		Ga0212129_11218	-0.144183	-1.01235
Ga0212129_112180	-0.779737	-2.14876		Ga0212129_112180	-0.620711	-0.981587		Ga0212129_112180	-0.0145917	-0.0362915			Ga0212129_112180	0.0517052	0.118662		Ga0212129_112180	0.201825	0.438093		Ga0212129_112180	0.117889	0.275057			Ga0212129_112180	-0.0718775	-0.17033		Ga0212129_112180	-0.0675297	-0.181474		Ga0212129_112180	0.246402	0.657284			Ga0212129_112180	-0.0867552	-0.24303		Ga0212129_112180	-0.210878	-0.497618		Ga0212129_112180	0.0415476	0.113945
Ga0212129_112181	-0.15994	-0.905588		Ga0212129_112181	-0.465443	-1.96099		Ga0212129_112181	-0.391813	-1.93688			Ga0212129_112181	-0.308578	-1.88357		Ga0212129_112181	-0.235023	-1.58352		Ga0212129_112181	-0.358977	-2.19922			Ga0212129_112181	-0.316834	-1.86358		Ga0212129_112181	-0.350787	-2.07348		Ga0212129_112181	-0.294397	-1.84402			Ga0212129_112181	-0.121891	-0.802707		Ga0212129_112181	-0.269889	-1.79195		Ga0212129_112181	-0.385349	-2.12966
Ga0212129_112182	0.14536	0.782817		Ga0212129_112182	0.253316	1.12465		Ga0212129_112182	0.246174	1.24271			Ga0212129_112182	0.140407	0.849287		Ga0212129_112182	0.0508314	0.288089		Ga0212129_112182	0.03518	0.212488			Ga0212129_112182	0.116613	0.707176		Ga0212129_112182	-0.034969	-0.187037		Ga0212129_112182	0.101334	0.572772			Ga0212129_112182	0.0538397	0.295754		Ga0212129_112182	0.0774814	0.441909		Ga0212129_112182	0.158234	0.877999
Ga0212129_112183	0.334169	1.97581		Ga0212129_112183	0.346633	2.18127		Ga0212129_112183	0.446312	2.42713			Ga0212129_112183	0.354375	2.44804		Ga0212129_112183	0.367743	2.56702		Ga0212129_112183	0.303842	2.12068			Ga0212129_112183	0.322734	2.11914		Ga0212129_112183	0.334321	2.28403		Ga0212129_112183	0.291068	1.97809			Ga0212129_112183	0.360214	2.46093		Ga0212129_112183	0.245327	1.68609		Ga0212129_112183	0.29352	2.01972
Ga0212129_112184	0.210023	1.09193		Ga0212129_112184	0.252267	1.2428		Ga0212129_112184	0.0902907	0.446776			Ga0212129_112184	0.0340856	0.206799		Ga0212129_112184	-0.0478376	-0.282857		Ga0212129_112184	0.0833885	0.449271			Ga0212129_112184	0.0862507	0.472659		Ga0212129_112184	-0.0878122	-0.512232		Ga0212129_112184	-0.0225143	-0.13573			Ga0212129_112184	0.106798	0.601733		Ga0212129_112184	-0.0480728	-0.277385		Ga0212129_112184	-0.0190977	-0.11464
Ga0212129_112185	-1.30008	-2.68265		Ga0212129_112185	-1.53241	-2.53967		Ga0212129_112185	-0.615116	-0.837688			Ga0212129_112185	-0.890504	-2.48146		Ga0212129_112185	-1.48271	-4.19197		Ga0212129_112185	-1.11666	-3.33156			Ga0212129_112185	-1.75425	-4.60939		Ga0212129_112185	-1.06353	-2.9329		Ga0212129_112185	-0.91465	-2.60917			Ga0212129_112185	-1.96629	-5.07423		Ga0212129_112185	-1.06067	-2.94094		Ga0212129_112185	-1.04881	-2.88537
Ga0212129_112186	0.204581	0.575036		Ga0212129_112186	0.388343	1.14781		Ga0212129_112186	-0.154707	-0.389952			Ga0212129_112186	-0.0902258	-0.291609		Ga0212129_112186	-0.272638	-0.83462		Ga0212129_112186	-0.404554	-1.47832			Ga0212129_112186	-0.166665	-0.563331		Ga0212129_112186	-0.109508	-0.390462		Ga0212129_112186	-0.054154	-0.169347			Ga0212129_112186	-0.186659	-0.526293		Ga0212129_112186	-0.137652	-0.476627		Ga0212129_112186	-0.190445	-0.694437
Ga0212129_112187	-0.855304	-1.50243		Ga0212129_112187	-0.0736365	-0.0915451		Ga0212129_112187	0.234667	0.533126			Ga0212129_112187	0.0927268	0.196904		Ga0212129_112187	-0.239486	-0.592986		Ga0212129_112187	-0.104984	-0.218484			Ga0212129_112187	0.176203	0.405878		Ga0212129_112187	0.000770827	0.00218622		Ga0212129_112187	-0.201076	-0.606865			Ga0212129_112187	-0.313187	-0.903184		Ga0212129_112187	-0.258458	-0.498286		Ga0212129_112187	0.120101	0.272932
Ga0212129_112188	0.118681	0.384283		Ga0212129_112188	-0.795603	-1.94106		Ga0212129_112188	-0.0935456	-0.391964			Ga0212129_112188	-0.00875184	-0.0422778		Ga0212129_112188	-0.250792	-1.1333		Ga0212129_112188	0.249181	1.11458			Ga0212129_112188	0.414282	2.35242		Ga0212129_112188	0.0633878	0.306659		Ga0212129_112188	0.27254	1.17711			Ga0212129_112188	0.0161534	0.0740766		Ga0212129_112188	0.0607494	0.237842		Ga0212129_112188	0.0849254	0.352846
Ga0212129_112189	-0.00687386	-0.046722		Ga0212129_112189	-0.289704	-1.7625		Ga0212129_112189	-0.231603	-1.52987			Ga0212129_112189	-0.0296704	-0.219562		Ga0212129_112189	-0.0919521	-0.701081		Ga0212129_112189	-0.144497	-1.07025			Ga0212129_112189	-0.0397029	-0.301858		Ga0212129_112189	-0.189889	-1.38947		Ga0212129_112189	-0.117496	-0.881567			Ga0212129_112189	-0.175994	-1.34215		Ga0212129_112189	-0.142631	-1.07333		Ga0212129_112189	-0.157752	-1.14342
Ga0212129_11219	-0.424037	-1.29007		Ga0212129_11219	-1.26764	-4.17522		Ga0212129_11219	-0.939158	-2.59698			Ga0212129_11219	-0.495281	-2.13769		Ga0212129_11219	-0.409439	-1.58539		Ga0212129_11219	-0.374508	-1.52898			Ga0212129_11219	-0.439886	-1.73376		Ga0212129_11219	-0.63565	-2.57682		Ga0212129_11219	-0.375849	-1.39008			Ga0212129_11219	-0.323076	-1.16242		Ga0212129_11219	-0.469447	-1.72805		Ga0212129_11219	-0.293365	-1.13032
Ga0212129_112190	-0.371233	-1.59824		Ga0212129_112190	-0.256682	-0.899409		Ga0212129_112190	0.262513	1.04991			Ga0212129_112190	-0.164746	-0.870697		Ga0212129_112190	-0.157347	-0.830185		Ga0212129_112190	-0.0992113	-0.483299			Ga0212129_112190	-0.225532	-1.1692		Ga0212129_112190	-0.0876636	-0.38433		Ga0212129_112190	-0.144211	-0.699593			Ga0212129_112190	-0.037117	-0.177324		Ga0212129_112190	-0.0682047	-0.353858		Ga0212129_112190	-0.112025	-0.652511
Ga0212129_112191	0.0373478	0.158704		Ga0212129_112191	0.00289109	0.0111394		Ga0212129_112191	-0.339346	-1.67255			Ga0212129_112191	-0.117322	-0.583259		Ga0212129_112191	-0.0207542	-0.109838		Ga0212129_112191	0.0310052	0.159339			Ga0212129_112191	-0.159596	-0.78298		Ga0212129_112191	-0.122658	-0.564284		Ga0212129_112191	-0.112092	-0.574098			Ga0212129_112191	0.102345	0.532891		Ga0212129_112191	0.0735929	0.385751		Ga0212129_112191	-0.0323847	-0.166336
Ga0212129_112192	0.0873177	0.463804		Ga0212129_112192	0.278926	1.33705		Ga0212129_112192	0.245204	1.43386			Ga0212129_112192	0.207108	1.39408		Ga0212129_112192	0.235795	1.65434		Ga0212129_112192	0.116979	0.71763			Ga0212129_112192	0.179694	1.23614		Ga0212129_112192	0.110647	0.715293		Ga0212129_112192	0.107633	0.696507			Ga0212129_112192	0.273886	1.9167		Ga0212129_112192	0.165862	1.14687		Ga0212129_112192	0.133723	0.923488
Ga0212129_112193	-0.122435	-0.553358		Ga0212129_112193	0.242757	0.873842		Ga0212129_112193	0.287647	1.13692			Ga0212129_112193	0.013106	0.0624612		Ga0212129_112193	-0.104595	-0.46065		Ga0212129_112193	-0.0255141	-0.109315			Ga0212129_112193	-0.193415	-0.80722		Ga0212129_112193	-0.183953	-0.845373		Ga0212129_112193	-0.120235	-0.556443			Ga0212129_112193	-0.0547151	-0.231546		Ga0212129_112193	-0.291431	-1.16398		Ga0212129_112193	-0.114269	-0.484719
Ga0212129_112194	0.528739	2.52543		Ga0212129_112194	0.484377	2.06096		Ga0212129_112194	0.497648	2.21152			Ga0212129_112194	0.439752	2.67414		Ga0212129_112194	0.383581	2.10911		Ga0212129_112194	0.306225	1.6348			Ga0212129_112194	0.368316	1.95755		Ga0212129_112194	0.353166	1.87655		Ga0212129_112194	0.354285	2.09256			Ga0212129_112194	0.390717	2.08141		Ga0212129_112194	0.387204	2.13908		Ga0212129_112194	0.317421	1.80048
Ga0212129_112195	-0.0153038	-0.0550219		Ga0212129_112195	-0.148064	-0.414512		Ga0212129_112195	-0.291683	-0.963119			Ga0212129_112195	0.283352	1.47005		Ga0212129_112195	0.411462	1.8838		Ga0212129_112195	0.243913	1.08152			Ga0212129_112195	0.141025	0.703502		Ga0212129_112195	0.357569	1.96514		Ga0212129_112195	0.282644	1.44782			Ga0212129_112195	0.316923	1.39487		Ga0212129_112195	0.195376	0.932859		Ga0212129_112195	0.195324	0.891349
Ga0212129_112196	0.0860896	0.30231		Ga0212129_112196	0.458089	1.53236		Ga0212129_112196	0.183835	0.521931			Ga0212129_112196	0.0492291	0.227335		Ga0212129_112196	0.159172	0.6871		Ga0212129_112196	-0.0234289	-0.099629			Ga0212129_112196	0.0613057	0.238616		Ga0212129_112196	0.0607734	0.243578		Ga0212129_112196	0.030393	0.117171			Ga0212129_112196	0.120897	0.475735		Ga0212129_112196	0.115388	0.426547		Ga0212129_112196	0.0610081	0.26608
Ga0212129_112197	1.04711	3.94555		Ga0212129_112197	0.213563	0.411353		Ga0212129_112197	0.341629	1.0618			Ga0212129_112197	0.292726	0.832902		Ga0212129_112197	0.44801	1.49056		Ga0212129_112197	0.140721	0.495812			Ga0212129_112197	0.226587	0.728816		Ga0212129_112197	0.152334	0.458346		Ga0212129_112197	0.267759	0.860058			Ga0212129_112197	0.369753	1.08593		Ga0212129_112197	0.169671	0.520947		Ga0212129_112197	0.380227	1.04365
Ga0212129_112199	0.00362316	0.0133385		Ga0212129_112199	0.0467072	0.168829		Ga0212129_112199	-0.015621	-0.0543459			Ga0212129_112199	-0.111398	-0.439623		Ga0212129_112199	-0.0794032	-0.335836		Ga0212129_112199	-0.0541998	-0.240136			Ga0212129_112199	0.0462013	0.210119		Ga0212129_112199	-0.0484782	-0.217442		Ga0212129_112199	-0.125307	-0.515433			Ga0212129_112199	0.028174	0.115197		Ga0212129_112199	-0.0572254	-0.249575		Ga0212129_112199	-0.140329	-0.566096
Ga0212129_11220	0.0425504	0.183433		Ga0212129_11220	-0.900782	-3.35701		Ga0212129_11220	0.291925	1.25063			Ga0212129_11220	-0.0377418	-0.205019		Ga0212129_11220	-0.12078	-0.561398		Ga0212129_11220	0.0864024	0.451751			Ga0212129_11220	0.0340156	0.178244		Ga0212129_11220	-0.155122	-0.820923		Ga0212129_11220	0.11985	0.663361			Ga0212129_11220	0.045474	0.236176		Ga0212129_11220	-0.0700099	-0.339714		Ga0212129_11220	-0.0909733	-0.485402
Ga0212129_112201	-0.0324924	-0.137281		Ga0212129_112201	-0.00256081	-0.0104526		Ga0212129_112201	0.309537	1.36889			Ga0212129_112201	0.196592	1.06694		Ga0212129_112201	0.1212	0.582477		Ga0212129_112201	0.163655	0.774749			Ga0212129_112201	0.0942196	0.454053		Ga0212129_112201	0.162078	0.792469		Ga0212129_112201	0.150733	0.725329			Ga0212129_112201	0.201304	1.02749		Ga0212129_112201	0.0708981	0.349446		Ga0212129_112201	0.157307	0.850336
Ga0212129_112202	0.136578	0.665819		Ga0212129_112202	0.0471259	0.220186		Ga0212129_112202	0.499674	2.36861			Ga0212129_112202	0.170484	0.891926		Ga0212129_112202	0.155461	0.797395		Ga0212129_112202	0.220779	1.12525			Ga0212129_112202	0.0832372	0.447575		Ga0212129_112202	0.277434	1.52819		Ga0212129_112202	0.128473	0.673483			Ga0212129_112202	0.135511	0.734398		Ga0212129_112202	0.244	1.38452		Ga0212129_112202	0.146611	0.783308
Ga0212129_112204	0.0739485	0.313185		Ga0212129_112204	-0.0453117	-0.237278		Ga0212129_112204	0.157144	0.856707			Ga0212129_112204	-0.137873	-0.750674		Ga0212129_112204	-0.134785	-0.738743		Ga0212129_112204	-0.118385	-0.684196			Ga0212129_112204	-0.20102	-1.09165		Ga0212129_112204	-0.0649186	-0.359486		Ga0212129_112204	-0.0530156	-0.287032			Ga0212129_112204	0.0866668	0.506424		Ga0212129_112204	-0.0803595	-0.448273		Ga0212129_112204	-0.335135	-1.81527
Ga0212129_112205	0.125777	0.544805		Ga0212129_112205	-0.330769	-1.06012		Ga0212129_112205	0.146618	0.537669			Ga0212129_112205	0.135836	0.644695		Ga0212129_112205	-0.138604	-0.526198		Ga0212129_112205	-0.0321482	-0.127491			Ga0212129_112205	0.0287309	0.123346		Ga0212129_112205	-0.00704013	-0.0286076		Ga0212129_112205	-0.0783051	-0.315052			Ga0212129_112205	0.204273	0.816401		Ga0212129_112205	-0.0483786	-0.198992		Ga0212129_112205	0.0803059	0.308958
Ga0212129_112206	0.0449175	0.146151		Ga0212129_112206	0.20296	0.624709		Ga0212129_112206	0.439426	1.47186			Ga0212129_112206	0.0498603	0.243734		Ga0212129_112206	-0.117174	-0.474535		Ga0212129_112206	-0.0082237	-0.0357653			Ga0212129_112206	-0.0863306	-0.37925		Ga0212129_112206	-0.20902	-0.842075		Ga0212129_112206	-0.0807519	-0.364032			Ga0212129_112206	0.178397	0.670869		Ga0212129_112206	0.00850174	0.0321682		Ga0212129_112206	-0.0354379	-0.133512
Ga0212129_112207	-0.305537	-1.05521		Ga0212129_112207	-0.344379	-1.00871		Ga0212129_112207	-0.0840063	-0.339474			Ga0212129_112207	-0.104417	-0.424119		Ga0212129_112207	-0.299326	-1.28782		Ga0212129_112207	-0.33879	-1.35223			Ga0212129_112207	-0.272576	-1.03218		Ga0212129_112207	-0.319847	-1.35744		Ga0212129_112207	-0.404987	-1.86016			Ga0212129_112207	-0.429633	-1.58912		Ga0212129_112207	-0.448368	-1.76276		Ga0212129_112207	-0.189263	-0.879121
Ga0212129_112209	0.287042	0.696334		Ga0212129_112209	0.0486039	0.138415		Ga0212129_112209	0.373516	1.11342			Ga0212129_112209	0.090158	0.287906		Ga0212129_112209	0.0544944	0.18648		Ga0212129_112209	0.192547	0.60396			Ga0212129_112209	0.18876	0.654035		Ga0212129_112209	0.195952	0.650587		Ga0212129_112209	0.200563	0.644701			Ga0212129_112209	0.115047	0.39821		Ga0212129_112209	0.0712665	0.285193		Ga0212129_112209	0.246914	0.998381
Ga0212129_11221	0.509543	2.38289		Ga0212129_11221	-0.197718	-0.734494		Ga0212129_11221	0.0144414	0.0665368			Ga0212129_11221	0.0393114	0.216408		Ga0212129_11221	0.205741	1.05843		Ga0212129_11221	0.163314	0.866431			Ga0212129_11221	0.085423	0.519909		Ga0212129_11221	0.107987	0.606483		Ga0212129_11221	0.0544115	0.281759			Ga0212129_11221	0.117968	0.618506		Ga0212129_11221	0.159572	0.888014		Ga0212129_11221	-0.057525	-0.317188
Ga0212129_112210	-0.318641	-1.78333		Ga0212129_112210	-0.191512	-0.903611		Ga0212129_112210	-0.221164	-1.07401			Ga0212129_112210	-0.283758	-1.5667		Ga0212129_112210	-0.217635	-1.2133		Ga0212129_112210	-0.290133	-1.6356			Ga0212129_112210	-0.204881	-1.31128		Ga0212129_112210	-0.542784	-3.04927		Ga0212129_112210	-0.416789	-2.46407			Ga0212129_112210	-0.332423	-1.89046		Ga0212129_112210	-0.328537	-1.95376		Ga0212129_112210	-0.287448	-1.65734
Ga0212129_112211	0.400588	1.4806		Ga0212129_112211	0.128557	0.416446		Ga0212129_112211	-0.0342073	-0.115279			Ga0212129_112211	0.38696	1.66356		Ga0212129_112211	0.225597	0.839687		Ga0212129_112211	0.379381	1.66299			Ga0212129_112211	0.143591	0.612874		Ga0212129_112211	0.145029	0.613187		Ga0212129_112211	0.25974	1.13084			Ga0212129_112211	0.153234	0.660032		Ga0212129_112211	0.179138	0.758838		Ga0212129_112211	0.289293	1.23751
Ga0212129_112217	-0.386496	-0.975153		Ga0212129_112217	-0.380848	-1.20078		Ga0212129_112217	-0.913864	-2.00246			Ga0212129_112217	-0.352285	-1.25457		Ga0212129_112217	-0.789599	-2.13574		Ga0212129_112217	-0.740024	-2.02699			Ga0212129_112217	-0.53239	-1.74993		Ga0212129_112217	-0.787111	-2.47444		Ga0212129_112217	-0.588609	-2.08548			Ga0212129_112217	-0.70319	-1.83631		Ga0212129_112217	-0.578949	-1.65042		Ga0212129_112217	-0.422951	-1.61314
Ga0212129_112218	0.231845	0.580301		Ga0212129_112218	0.234477	0.865161		Ga0212129_112218	-0.167106	-0.586436			Ga0212129_112218	0.270978	1.29878		Ga0212129_112218	-0.0390222	-0.147948		Ga0212129_112218	0.152868	0.559448			Ga0212129_112218	0.173515	0.732641		Ga0212129_112218	0.037915	0.148125		Ga0212129_112218	-0.01036	-0.036195			Ga0212129_112218	-0.206055	-0.772154		Ga0212129_112218	0.0355814	0.162993		Ga0212129_112218	-0.0469556	-0.173869
Ga0212129_11222	-0.328942	-1.78126		Ga0212129_11222	-0.399242	-1.87009		Ga0212129_11222	-0.0309479	-0.143899			Ga0212129_11222	-0.197108	-1.14619		Ga0212129_11222	-0.119133	-0.71012		Ga0212129_11222	-0.162347	-0.943692			Ga0212129_11222	-0.120508	-0.681677		Ga0212129_11222	-0.180648	-1.09138		Ga0212129_11222	-0.112312	-0.673671			Ga0212129_11222	-0.0921169	-0.518301		Ga0212129_11222	-0.255643	-1.52539		Ga0212129_11222	-0.321907	-1.93721
Ga0212129_112221	0.24021	0.654294		Ga0212129_112221	-0.534619	-0.884884		Ga0212129_112221	-0.675699	-1.1487			Ga0212129_112221	-0.10156	-0.27967		Ga0212129_112221	-0.293878	-0.728545		Ga0212129_112221	-0.364777	-0.93852			Ga0212129_112221	-0.296804	-0.778935		Ga0212129_112221	-0.161375	-0.373702		Ga0212129_112221	-0.218352	-0.655749			Ga0212129_112221	-0.257137	-0.670177		Ga0212129_112221	-0.328729	-0.852653		Ga0212129_112221	-0.224214	-0.628762
Ga0212129_112222	-0.978782	-3.16615		Ga0212129_112222	-1.8958	-3.93081		Ga0212129_112222	-2.02348	-4.6016			Ga0212129_112222	-1.05756	-3.40842		Ga0212129_112222	-1.61712	-4.92606		Ga0212129_112222	-1.46497	-4.66164			Ga0212129_112222	-0.357539	-1.60467		Ga0212129_112222	-0.950409	-3.28189		Ga0212129_112222	-1.28151	-4.61534			Ga0212129_112222	-0.973856	-3.81958		Ga0212129_112222	-1.67543	-4.96757		Ga0212129_112222	-1.74531	-5.51754
Ga0212129_11223	-0.0799375	-0.434253		Ga0212129_11223	-0.043894	-0.193415		Ga0212129_11223	-0.162395	-0.795171			Ga0212129_11223	0.0762459	0.410796		Ga0212129_11223	-0.0210586	-0.118329		Ga0212129_11223	0.0456908	0.25456			Ga0212129_11223	0.123365	0.699887		Ga0212129_11223	0.117118	0.692589		Ga0212129_11223	-0.0198646	-0.109778			Ga0212129_11223	0.125588	0.711821		Ga0212129_11223	0.0772083	0.424437		Ga0212129_11223	0.0543508	0.298348
Ga0212129_112234	-0.00638094	-0.0184138		Ga0212129_112234	-0.880852	-1.62574		Ga0212129_112234	0.126913	0.418993			Ga0212129_112234	-0.132508	-0.352426		Ga0212129_112234	-0.231004	-0.667712		Ga0212129_112234	-0.0474744	-0.116587			Ga0212129_112234	0.00133503	0.00356877		Ga0212129_112234	-0.161189	-0.356082		Ga0212129_112234	-0.349872	-0.87761			Ga0212129_112234	-0.131774	-0.335902		Ga0212129_112234	-0.347402	-1.05486		Ga0212129_112234	-0.319142	-0.766681
Ga0212129_112239	-0.155117	-0.381483		Ga0212129_112239	0.60629	1.98204		Ga0212129_112239	0.309302	0.767838			Ga0212129_112239	-0.138161	-0.480003		Ga0212129_112239	0.368423	1.06816		Ga0212129_112239	0.035965	0.095954			Ga0212129_112239	0.0776916	0.252074		Ga0212129_112239	0.0951299	0.328791		Ga0212129_112239	0.307217	1.10001			Ga0212129_112239	0.38216	1.18751		Ga0212129_112239	0.141733	0.498384		Ga0212129_112239	0.190605	0.681188
Ga0212129_11224	0.0540401	0.290112		Ga0212129_11224	-0.231541	-1.32745		Ga0212129_11224	0.153259	0.921414			Ga0212129_11224	-0.0485931	-0.327058		Ga0212129_11224	-0.145267	-0.955316		Ga0212129_11224	-0.0523065	-0.339534			Ga0212129_11224	-0.10275	-0.644465		Ga0212129_11224	-0.0481934	-0.310402		Ga0212129_11224	-0.0740449	-0.49088			Ga0212129_11224	0.0527246	0.342242		Ga0212129_11224	-0.118797	-0.804829		Ga0212129_11224	-0.0930626	-0.606881
Ga0212129_112240	-0.0740216	-0.346937		Ga0212129_112240	0.197265	0.85802		Ga0212129_112240	0.121734	0.507318			Ga0212129_112240	0.176067	0.87625		Ga0212129_112240	0.145142	0.747371		Ga0212129_112240	0.0729714	0.341016			Ga0212129_112240	0.0963128	0.491654		Ga0212129_112240	0.0443684	0.224303		Ga0212129_112240	0.121533	0.595447			Ga0212129_112240	0.0164375	0.0820972		Ga0212129_112240	0.0160596	0.0795708		Ga0212129_112240	0.121684	0.607466
Ga0212129_112241	0.201009	1.17171		Ga0212129_112241	0.0433382	0.207849		Ga0212129_112241	-0.043926	-0.214255			Ga0212129_112241	0.19264	1.19067		Ga0212129_112241	0.156505	0.961095		Ga0212129_112241	0.0644202	0.388582			Ga0212129_112241	-0.0335461	-0.213593		Ga0212129_112241	0.0159971	0.0922116		Ga0212129_112241	0.0883431	0.539079			Ga0212129_112241	-0.0852726	-0.507636		Ga0212129_112241	0.0385508	0.215522		Ga0212129_112241	-0.0335622	-0.208576
Ga0212129_112242	0.0281624	0.0399425		Ga0212129_112242	0.427974	0.805138		Ga0212129_112242	0.17587	0.274798			Ga0212129_112242	0.471043	0.999185		Ga0212129_112242	0.308904	0.877116		Ga0212129_112242	0.397284	0.840519			Ga0212129_112242	0.351393	0.830306		Ga0212129_112242	0.124606	0.269394		Ga0212129_112242	0.421519	0.91988			Ga0212129_112242	0.127449	0.296186		Ga0212129_112242	0.408871	0.946801		Ga0212129_112242	0.18711	0.417491
Ga0212129_112245	-0.137421	-0.287309		Ga0212129_112245	0.128101	0.282228		Ga0212129_112245	-0.498536	-1.14812			Ga0212129_112245	-0.226573	-0.577434		Ga0212129_112245	-0.307246	-0.736273		Ga0212129_112245	-0.140093	-0.454694			Ga0212129_112245	-0.24382	-0.696619		Ga0212129_112245	-0.0936487	-0.232289		Ga0212129_112245	-0.36395	-1.00453			Ga0212129_112245	-0.336848	-0.847199		Ga0212129_112245	-0.175679	-0.509436		Ga0212129_112245	-0.304057	-0.983685
Ga0212129_112246	-0.311178	-0.911827		Ga0212129_112246	-0.140444	-0.223397		Ga0212129_112246	-1.03782	-1.99182			Ga0212129_112246	0.266676	0.862564		Ga0212129_112246	0.429329	1.33208		Ga0212129_112246	0.339609	0.936633			Ga0212129_112246	0.11448	0.40447		Ga0212129_112246	0.246322	0.784208		Ga0212129_112246	0.228851	0.850194			Ga0212129_112246	0.22726	0.837199		Ga0212129_112246	0.261067	0.864417		Ga0212129_112246	0.370026	1.20571
Ga0212129_112248	0.0993775	0.255002		Ga0212129_112248	-0.687092	-1.40751		Ga0212129_112248	-0.673248	-1.66585			Ga0212129_112248	-0.0851866	-0.284295		Ga0212129_112248	0.016628	0.0643966		Ga0212129_112248	-0.0805783	-0.261893			Ga0212129_112248	-0.149174	-0.449315		Ga0212129_112248	-0.0920379	-0.344236		Ga0212129_112248	-0.0114719	-0.0418215			Ga0212129_112248	-0.0337545	-0.129633		Ga0212129_112248	-0.42096	-1.53398		Ga0212129_112248	-0.16419	-0.49198
Ga0212129_11225	-0.0626085	-0.362459		Ga0212129_11225	-0.171951	-0.770379		Ga0212129_11225	-0.14589	-0.824689			Ga0212129_11225	0.0208279	0.129634		Ga0212129_11225	-0.0742638	-0.497958		Ga0212129_11225	-0.00332199	-0.020472			Ga0212129_11225	0.0443952	0.264163		Ga0212129_11225	-0.0997499	-0.614836		Ga0212129_11225	-0.0623694	-0.413595			Ga0212129_11225	-0.0559567	-0.344113		Ga0212129_11225	-0.0875022	-0.539385		Ga0212129_11225	0.00597616	0.0396683
Ga0212129_112250	-0.621194	-2.16097		Ga0212129_112250	-0.36117	-0.900017		Ga0212129_112250	-0.180047	-0.662307			Ga0212129_112250	0.328145	1.54526		Ga0212129_112250	-0.0230417	-0.102962		Ga0212129_112250	0.00760911	0.0337284			Ga0212129_112250	-0.0384196	-0.177354		Ga0212129_112250	0.00473338	0.0215203		Ga0212129_112250	0.194916	0.807961			Ga0212129_112250	0.204517	0.950724		Ga0212129_112250	0.00827845	0.0367355		Ga0212129_112250	0.10103	0.450575
Ga0212129_112251	0.259912	0.869734		Ga0212129_112251	-1.02898	-2.25655		Ga0212129_112251	-0.0023592	-0.00762035			Ga0212129_112251	0.148383	0.600382		Ga0212129_112251	0.0972018	0.400341		Ga0212129_112251	0.0268314	0.105972			Ga0212129_112251	-0.0929679	-0.336872		Ga0212129_112251	0.226311	0.919516		Ga0212129_112251	0.164899	0.683907			Ga0212129_112251	-0.121828	-0.460389		Ga0212129_112251	0.027018	0.108061		Ga0212129_112251	-0.000520887	-0.00208945
Ga0212129_112252	-0.717266	-2.47586		Ga0212129_112252	-0.521053	-2.00869		Ga0212129_112252	-0.812199	-3.42309			Ga0212129_112252	-0.312718	-1.71482		Ga0212129_112252	-0.469068	-2.36187		Ga0212129_112252	-0.333488	-1.82012			Ga0212129_112252	-0.350096	-1.98113		Ga0212129_112252	-0.40884	-2.0281		Ga0212129_112252	-0.446629	-2.26217			Ga0212129_112252	-0.411789	-2.34923		Ga0212129_112252	-0.438342	-2.22145		Ga0212129_112252	-0.482682	-2.53158
Ga0212129_112253	0.0574564	0.382895		Ga0212129_112253	0.150998	0.964262		Ga0212129_112253	0.157512	1.0149			Ga0212129_112253	0.272791	2.04607		Ga0212129_112253	0.260399	1.82126		Ga0212129_112253	0.193288	1.39405			Ga0212129_112253	0.198394	1.50779		Ga0212129_112253	0.231002	1.72547		Ga0212129_112253	0.278724	1.98464			Ga0212129_112253	0.272902	1.99035		Ga0212129_112253	0.169295	1.21992		Ga0212129_112253	0.187291	1.41533
Ga0212129_112254	-0.0235425	-0.131697		Ga0212129_112254	0.302275	1.62		Ga0212129_112254	-0.125107	-0.695086			Ga0212129_112254	0.0409697	0.259627		Ga0212129_112254	-0.000666904	-0.00406707		Ga0212129_112254	-0.0887217	-0.547545			Ga0212129_112254	-0.00549501	-0.0346434		Ga0212129_112254	-0.0530329	-0.316498		Ga0212129_112254	-0.0392008	-0.229821			Ga0212129_112254	0.0404515	0.256542		Ga0212129_112254	0.0225037	0.136486		Ga0212129_112254	0.0332005	0.213957
Ga0212129_112255	0.129829	0.448838		Ga0212129_112255	0.226292	0.736456		Ga0212129_112255	-0.21183	-0.803636			Ga0212129_112255	0.126684	0.591593		Ga0212129_112255	0.0243343	0.102127		Ga0212129_112255	0.00688491	0.0273327			Ga0212129_112255	0.192269	0.947126		Ga0212129_112255	0.00373225	0.0141456		Ga0212129_112255	0.0428014	0.173847			Ga0212129_112255	0.0758269	0.268948		Ga0212129_112255	-0.0329179	-0.145701		Ga0212129_112255	0.00197268	0.00863181
[truncated: 2,168 more rows]

## Sheet: Alone - Filtered
List of genes with negative fitness for P. psychrophila JB418 growth alone on CCA
[truncated: 180 more rows]

[truncated: 8 more sheets: Pairwise - Filtered, Community -  Filtered, Conserved negative fitness, Pairwise-induced interactions, Pairwise-alleviated interaction, Core negative fitness, Interaction-induced fitness,  Interaction-alleviated fitness]
