# Supplementary material for: Changes in the genetic requirements for microbial interactions with increasing community complexity
Source: eLife journal article supplement (doi:10.7554/elife.37072), 2018-09-13
Supplement: supp [file elife-37072-supp-v1.zip › elife_poa_e37072_Figure_2_source_data_1.xlsx]

## Sheet: Raw Fitness
Raw data - Gene fitness values an t-score values for the 3298 genes with estimated fitness from RB-TnSeq - Growth in pairwise conditions Day 1, Day 2 and Day 3
with H. alvei																with G. candidum																with P. camemberti
Day1					Day2					Day3						Day1					Day2					Day3						Day1					Day2					Day3
locusId	sysName	Fitness value	t-score		locusId	sysName	Fitness value	t-score		locusId	sysName	Fitness value	t-score			locusId	sysName	Fitness value	t-score		locusId	sysName	Fitness value	t-score		locusId	sysName	Fitness value	t-score			locusId	sysName	Fitness value	t-score		locusId	sysName	Fitness value	t-score		locusId	sysName	Fitness value	t-score
14146	b0001	0.216011	0.478212		14146	b0001	-0.28937	-0.604845		14146	b0001	-0.0872496	-0.191064			14146	b0001	-0.0559107	-0.151831		14146	b0001	-0.0790593	-0.186622		14146	b0001	0.175843	0.394566			14146	b0001	0.177149	0.494443		14146	b0001	-0.218442	-0.522848		14146	b0001	-0.107762	-0.300929
14147	b0002	-0.00467075	-0.0344121		14147	b0002	-0.219764	-1.67909		14147	b0002	-0.375022	-2.80114			14147	b0002	-0.0345975	-0.259212		14147	b0002	-0.178766	-1.34189		14147	b0002	-0.179728	-1.39024			14147	b0002	-0.0616204	-0.453784		14147	b0002	-0.270437	-2.11915		14147	b0002	-0.366357	-2.83131
14148	b0003	-0.0898187	-0.572931		14148	b0003	-0.315023	-2.03379		14148	b0003	-0.523265	-3.24243			14148	b0003	-0.0669429	-0.413459		14148	b0003	-0.235436	-1.41039		14148	b0003	-0.285049	-1.89047			14148	b0003	-0.206145	-1.12399		14148	b0003	-0.435165	-2.88398		14148	b0003	-0.725387	-4.79258
14149	b0004	-0.313647	-1.72014		14149	b0004	-0.977377	-4.46805		14149	b0004	-1.11882	-5.64299			14149	b0004	-0.140525	-0.789708		14149	b0004	-0.811952	-4.33344		14149	b0004	-1.01973	-4.91642			14149	b0004	-0.272411	-1.46698		14149	b0004	-0.982058	-5.47482		14149	b0004	-1.16982	-6.45744
14150	b0005	0.0872276	0.36636		14150	b0005	0.0956681	0.395389		14150	b0005	0.0326475	0.125793			14150	b0005	0.109105	0.38282		14150	b0005	0.0599894	0.275724		14150	b0005	0.0651884	0.24936			14150	b0005	-0.111197	-0.408805		14150	b0005	0.0372393	0.155906		14150	b0005	0.000803739	0.00301776
14151	b0006	-0.147076	-1.03102		14151	b0006	-0.216201	-1.36701		14151	b0006	-0.158337	-1.08835			14151	b0006	-0.114852	-0.785475		14151	b0006	-0.153224	-1.04608		14151	b0006	-0.0564888	-0.376127			14151	b0006	-0.190692	-1.17373		14151	b0006	-0.137163	-0.954168		14151	b0006	-0.0771431	-0.537137
14152	b0007	-0.109016	-0.594403		14152	b0007	-0.151895	-0.835928		14152	b0007	-0.145164	-0.808537			14152	b0007	-0.123936	-0.676583		14152	b0007	-0.0533839	-0.276578		14152	b0007	-0.110416	-0.598839			14152	b0007	-0.112805	-0.62008		14152	b0007	-0.13516	-0.776061		14152	b0007	-0.106028	-0.565422
14153	b0008	0.0745638	0.501688		14153	b0008	-0.011786	-0.0703654		14153	b0008	0.0572728	0.386342			14153	b0008	0.148495	0.924355		14153	b0008	-0.0109026	-0.0683558		14153	b0008	0.0998532	0.677662			14153	b0008	-0.0896157	-0.567722		14153	b0008	0.0570585	0.356763		14153	b0008	-0.0660834	-0.399096
14154	b0009	-0.0627879	-0.285579		14154	b0009	-0.191911	-0.853354		14154	b0009	-0.222113	-1.20604			14154	b0009	-0.138025	-0.682113		14154	b0009	-0.117626	-0.557247		14154	b0009	-0.113061	-0.605781			14154	b0009	-0.0257722	-0.133071		14154	b0009	-0.0997095	-0.48922		14154	b0009	-0.211489	-1.10696
14155	b0010	0.0873282	0.346399		14155	b0010	-0.00308464	-0.011109		14155	b0010	-0.0479168	-0.208463			14155	b0010	0.146333	0.699341		14155	b0010	-0.0536063	-0.173538		14155	b0010	0.0997426	0.418808			14155	b0010	0.117006	0.429475		14155	b0010	0.0121428	0.0447144		14155	b0010	-0.0168502	-0.0725148
14156	b0011	0.137627	0.838717		14156	b0011	-0.0530684	-0.326419		14156	b0011	-0.0782935	-0.476277			14156	b0011	-0.0432754	-0.290521		14156	b0011	-0.00995071	-0.0640639		14156	b0011	-0.0215366	-0.14761			14156	b0011	0.0881671	0.521724		14156	b0011	0.0785902	0.516925		14156	b0011	-0.0227642	-0.143714
14158	b0013	-0.251156	-1.21344		14158	b0013	-0.173639	-0.693658		14158	b0013	-0.329322	-1.00926			14158	b0013	-0.161296	-0.600167		14158	b0013	-0.390105	-1.35501		14158	b0013	-0.309753	-1.08298			14158	b0013	-0.35916	-1.28729		14158	b0013	-0.254668	-1.06442		14158	b0013	-0.373249	-1.28074
14160	b0015	-0.197798	-1.01852		14160	b0015	-0.27509	-1.56695		14160	b0015	-0.30677	-1.64483			14160	b0015	-0.319837	-1.86956		14160	b0015	-0.539911	-2.80917		14160	b0015	-0.472612	-2.69525			14160	b0015	-0.104281	-0.618285		14160	b0015	-0.354176	-1.77286		14160	b0015	-0.445689	-2.32198
14164	b0019	-0.723689	-5.19008		14164	b0019	-5.45567	-11.5173		14164	b0019	-5.68265	-11.9964			14164	b0019	-0.310349	-2.14656		14164	b0019	-4.35579	-13.0823		14164	b0019	-2.49243	-15.682			14164	b0019	-0.257508	-1.58383		14164	b0019	-0.870049	-6.21174		14164	b0019	-1.6993	-11.179
14165	b0020	0.0157112	0.1155		14165	b0020	-0.00762261	-0.0548349		14165	b0020	-0.0773109	-0.574097			14165	b0020	0.0378181	0.278993		14165	b0020	0.00202155	0.0134542		14165	b0020	-0.0314728	-0.22218			14165	b0020	-0.104308	-0.752296		14165	b0020	-0.0907726	-0.625893		14165	b0020	-0.00665359	-0.0449533
14173	b0028	0.2841	0.73873		14173	b0028	0.728347	1.73623		14173	b0028	0.594791	1.67348			14173	b0028	0.371239	1.12323		14173	b0028	0.225568	0.530471		14173	b0028	0.295533	0.672356			14173	b0028	0.438598	1.2726		14173	b0028	0.355999	0.955786		14173	b0028	0.467141	1.22283
14175	b0030	-0.25915	-1.52928		14175	b0030	-0.155235	-0.837208		14175	b0030	-0.196615	-1.20818			14175	b0030	-0.139762	-0.789549		14175	b0030	-0.250368	-1.32599		14175	b0030	-0.0618982	-0.395098			14175	b0030	-0.367177	-1.79217		14175	b0030	-0.290092	-1.58677		14175	b0030	-0.2533	-1.4277
14177	b0032	-0.319332	-1.2134		14177	b0032	-0.081593	-0.303595		14177	b0032	-0.423213	-1.70813			14177	b0032	-0.154311	-0.626456		14177	b0032	-0.221415	-0.915857		14177	b0032	-0.297716	-1.10392			14177	b0032	-0.207044	-0.783769		14177	b0032	-0.211326	-0.853471		14177	b0032	-0.231637	-0.85551
14178	b0033	-0.13887	-1.12472		14178	b0033	-0.0169464	-0.133304		14178	b0033	-0.332992	-2.64917			14178	b0033	-0.0973381	-0.764362		14178	b0033	-0.155283	-1.22453		14178	b0033	-0.170126	-1.2787			14178	b0033	-0.0867703	-0.649979		14178	b0033	-0.189547	-1.48502		14178	b0033	-0.189519	-1.51557
14180	b0034	-0.262746	-1.84505		14180	b0034	-0.267661	-1.86546		14180	b0034	-0.273432	-1.86878			14180	b0034	-0.286648	-1.95764		14180	b0034	-0.277876	-1.87776		14180	b0034	-0.254209	-1.76262			14180	b0034	-0.374718	-2.43879		14180	b0034	-0.276371	-1.88685		14180	b0034	-0.158089	-1.09753
14181	b0035	-0.249911	-1.06832		14181	b0035	-0.25373	-1.14281		14181	b0035	-0.224672	-1.01054			14181	b0035	-0.315937	-1.19042		14181	b0035	-0.361146	-1.49931		14181	b0035	-0.219372	-0.962893			14181	b0035	-0.234261	-1.00938		14181	b0035	-0.305705	-1.27144		14181	b0035	-0.272575	-1.25789
14182	b0036	0.083986	0.469518		14182	b0036	-0.0708231	-0.406491		14182	b0036	-0.0249625	-0.142058			14182	b0036	0.196737	1.14558		14182	b0036	0.00134403	0.00751684		14182	b0036	0.0376656	0.218791			14182	b0036	0.0102134	0.0591204		14182	b0036	0.153512	0.978481		14182	b0036	0.0836191	0.436342
14183	b0037	-0.292618	-2.07038		14183	b0037	-0.281672	-2.0519		14183	b0037	-0.255832	-1.92609			14183	b0037	-0.266288	-1.94543		14183	b0037	-0.307346	-2.33295		14183	b0037	-0.181833	-1.3366			14183	b0037	-0.223252	-1.51627		14183	b0037	-0.234674	-1.75269		14183	b0037	-0.211158	-1.51027
14184	b0038	-0.134331	-0.944317		14184	b0038	-0.133973	-0.944924		14184	b0038	-0.13605	-1.00519			14184	b0038	-0.0818079	-0.631967		14184	b0038	-0.123787	-0.880799		14184	b0038	-0.0421662	-0.299799			14184	b0038	-0.113344	-0.845361		14184	b0038	-0.0916577	-0.663619		14184	b0038	-0.0629344	-0.438494
14185	b0039	-0.0494222	-0.289741		14185	b0039	0.139677	0.837632		14185	b0039	-0.0667289	-0.371215			14185	b0039	-0.0346173	-0.203323		14185	b0039	0.0500084	0.298656		14185	b0039	-0.0250378	-0.163521			14185	b0039	-0.0448149	-0.230949		14185	b0039	-0.0599023	-0.342501		14185	b0039	-0.0362637	-0.211372
14186	b0040	-0.159891	-1.13933		14186	b0040	-0.229371	-1.62464		14186	b0040	-0.235494	-1.67853			14186	b0040	-0.14184	-1.01932		14186	b0040	-0.11649	-0.818441		14186	b0040	-0.157497	-1.09501			14186	b0040	-0.141409	-1.01545		14186	b0040	-0.143247	-1.03866		14186	b0040	-0.193513	-1.32644
14187	b0041	-0.183207	-0.847347		14187	b0041	-0.353976	-1.56735		14187	b0041	-0.343648	-1.67884			14187	b0041	-0.166053	-0.820315		14187	b0041	-0.177125	-0.795198		14187	b0041	-0.119638	-0.577448			14187	b0041	-0.24935	-1.20461		14187	b0041	-0.251628	-1.21879		14187	b0041	-0.229065	-1.02877
14188	b0042	0.0633003	0.307108		14188	b0042	0.0887506	0.468123		14188	b0042	0.0830294	0.434158			14188	b0042	0.0442818	0.240258		14188	b0042	0.0455967	0.235942		14188	b0042	0.0769835	0.395141			14188	b0042	-0.000547688	-0.0026512		14188	b0042	0.161725	0.860672		14188	b0042	0.173974	0.953074
14189	b0043	-0.342554	-1.85004		14189	b0043	-0.262151	-1.40035		14189	b0043	-0.306648	-1.44336			14189	b0043	-0.296936	-1.48629		14189	b0043	-0.367877	-1.84058		14189	b0043	-0.205536	-1.01856			14189	b0043	-0.250859	-1.35014		14189	b0043	-0.397441	-2.08301		14189	b0043	-0.182599	-0.943698
14190	b0044	-0.0712624	-0.291179		14190	b0044	-0.147121	-0.597141		14190	b0044	-0.154279	-0.541852			14190	b0044	-0.128396	-0.49444		14190	b0044	-0.154391	-0.507258		14190	b0044	-0.00194592	-0.00736265			14190	b0044	-0.220751	-0.753915		14190	b0044	-0.168895	-0.660934		14190	b0044	0.0419099	0.17363
14191	b0045	0.0527306	0.293736		14191	b0045	0.106804	0.602906		14191	b0045	0.0916109	0.514698			14191	b0045	0.0187702	0.11067		14191	b0045	-0.0565599	-0.305161		14191	b0045	0.0905244	0.532355			14191	b0045	-0.0502791	-0.282058		14191	b0045	0.0594388	0.346801		14191	b0045	0.046716	0.2554
14192	b0046	-0.512914	-2.85155		14192	b0046	-0.518152	-3.11745		14192	b0046	-0.471421	-2.68909			14192	b0046	-0.567812	-3.43406		14192	b0046	-0.488486	-2.50675		14192	b0046	-0.343676	-2.10464			14192	b0046	-0.536166	-3.22401		14192	b0046	-0.408816	-2.50333		14192	b0046	-0.420852	-2.36295
14193	b0047	-0.154475	-1.13325		14193	b0047	-0.122726	-0.945584		14193	b0047	-0.162535	-1.21043			14193	b0047	-0.143053	-1.04595		14193	b0047	-0.132	-0.945458		14193	b0047	-0.0155905	-0.119129			14193	b0047	-0.158375	-1.09238		14193	b0047	-0.111324	-0.82263		14193	b0047	-0.0874784	-0.652864
14196	b0050	-0.101453	-0.506325		14196	b0050	-0.159611	-0.876764		14196	b0050	-0.168158	-0.87173			14196	b0050	-0.16865	-0.949913		14196	b0050	-0.107282	-0.582128		14196	b0050	-0.148382	-0.789168			14196	b0050	-0.17884	-0.949737		14196	b0050	0.0272765	0.151735		14196	b0050	-0.145434	-0.727469
14198	b0052	-0.00701859	-0.0481097		14198	b0052	-0.213857	-1.31087		14198	b0052	-0.077638	-0.475941			14198	b0052	-0.0431953	-0.264726		14198	b0052	-0.078066	-0.455182		14198	b0052	0.0140961	0.0869171			14198	b0052	-0.0634338	-0.352194		14198	b0052	-0.0767331	-0.457288		14198	b0052	-0.0324893	-0.200917
14201	b0055	-0.441565	-2.22422		14201	b0055	-0.458117	-2.43994		14201	b0055	-0.614901	-3.09496			14201	b0055	-0.417405	-2.24908		14201	b0055	-0.432057	-2.18775		14201	b0055	-0.492227	-2.39991			14201	b0055	-0.185787	-0.970658		14201	b0055	-0.50019	-2.66697		14201	b0055	-0.379115	-1.985
14204	b0058	-0.313321	-1.62887		14204	b0058	-0.251913	-1.21884		14204	b0058	-0.30062	-1.45359			14204	b0058	-0.125604	-0.60371		14204	b0058	-0.110284	-0.574351		14204	b0058	-0.192841	-0.852523			14204	b0058	-0.252949	-1.1603		14204	b0058	-0.226682	-1.08769		14204	b0058	-0.278126	-1.34358
14205	b0059	0.68237	5.46317		14205	b0059	0.505472	3.93427		14205	b0059	0.431095	3.39981			14205	b0059	0.68874	5.47646		14205	b0059	0.822591	6.58049		14205	b0059	0.729459	5.87603			14205	b0059	0.829523	6.68231		14205	b0059	0.813532	6.51983		14205	b0059	0.893369	7.06783
14206	b0060	-0.148379	-1.05105		14206	b0060	-0.143495	-0.94837		14206	b0060	-0.125645	-0.912931			14206	b0060	-0.0917215	-0.672185		14206	b0060	-0.115977	-0.824832		14206	b0060	-0.0267474	-0.186931			14206	b0060	-0.123545	-0.860758		14206	b0060	-0.0775941	-0.563751		14206	b0060	-0.0921665	-0.649391
14207	b0061	-0.509342	-2.50228		14207	b0061	-0.385601	-1.90576		14207	b0061	-0.603778	-2.9784			14207	b0061	-0.509835	-2.73273		14207	b0061	-0.544688	-2.64056		14207	b0061	-0.374562	-1.84636			14207	b0061	-0.560726	-2.85987		14207	b0061	-0.472861	-2.44433		14207	b0061	-0.528272	-2.32507
14210	b0064	-0.239296	-1.28152		14210	b0064	-0.210279	-1.15978		14210	b0064	-0.253225	-1.44			14210	b0064	-0.28216	-1.58709		14210	b0064	-0.259701	-1.31233		14210	b0064	-0.314413	-1.68699			14210	b0064	-0.247195	-1.12789		14210	b0064	-0.244115	-1.3848		14210	b0064	-0.189868	-0.981199
14211	b0065	0.0753722	0.384233		14211	b0065	0.0629868	0.299951		14211	b0065	-0.0222332	-0.108834			14211	b0065	0.105043	0.619674		14211	b0065	0.163938	0.785737		14211	b0065	-0.0598925	-0.287342			14211	b0065	-0.0085084	-0.0439969		14211	b0065	0.0608229	0.30856		14211	b0065	0.0757821	0.475021
14212	b0066	0.215545	1.18624		14212	b0066	0.0891286	0.533664		14212	b0066	0.104115	0.612085			14212	b0066	0.122861	0.692703		14212	b0066	0.246847	1.54646		14212	b0066	0.232991	1.326			14212	b0066	0.128177	0.694239		14212	b0066	0.185904	1.05483		14212	b0066	0.288546	1.59822
14213	b0067	-0.0266896	-0.206707		14213	b0067	-0.0688819	-0.552125		14213	b0067	-0.0192061	-0.152876			14213	b0067	-0.0646428	-0.509327		14213	b0067	-0.0255673	-0.193507		14213	b0067	-0.0286811	-0.223396			14213	b0067	0.00414122	0.0317416		14213	b0067	-0.0116078	-0.0916449		14213	b0067	0.0181382	0.141248
14214	b0068	-0.0344438	-0.232434		14214	b0068	0.0549695	0.38436		14214	b0068	-0.00386028	-0.0273331			14214	b0068	-0.077932	-0.510531		14214	b0068	-0.013341	-0.0836094		14214	b0068	0.00826775	0.0587511			14214	b0068	-0.00797053	-0.0472585		14214	b0068	-0.0767147	-0.538109		14214	b0068	0.0955664	0.65481
14215	b0069	0.099552	0.625636		14215	b0069	0.113954	0.787943		14215	b0069	0.0353041	0.220941			14215	b0069	0.0784564	0.539222		14215	b0069	0.0648194	0.450255		14215	b0069	0.140665	0.943605			14215	b0069	0.0685606	0.404214		14215	b0069	0.0877315	0.618764		14215	b0069	0.242677	1.57257
14217	b0071	-0.00733289	-0.0403505		14217	b0071	-0.103217	-0.587052		14217	b0071	-0.0874704	-0.54183			14217	b0071	-0.189572	-1.09246		14217	b0071	-0.221384	-1.10623		14217	b0071	-0.0533566	-0.30145			14217	b0071	-0.109411	-0.687115		14217	b0071	-0.15037	-0.877141		14217	b0071	-0.0558298	-0.32997
14218	b0072	-0.175129	-1.08148		14218	b0072	-0.0881941	-0.56815		14218	b0072	-0.177364	-1.14335			14218	b0072	-0.113614	-0.748175		14218	b0072	-0.14819	-0.924321		14218	b0072	-0.028969	-0.182919			14218	b0072	-0.0936977	-0.581681		14218	b0072	-0.142993	-0.933449		14218	b0072	-0.0805171	-0.516682
14219	b0073	0.119435	0.663017		14219	b0073	0.102863	0.579244		14219	b0073	-0.00120469	-0.00707328			14219	b0073	0.185736	1.09727		14219	b0073	0.181493	1.14982		14219	b0073	0.218307	1.24943			14219	b0073	0.217664	1.05553		14219	b0073	0.078866	0.419646		14219	b0073	0.16992	0.926488
14220	b0074	-0.0287651	-0.187055		14220	b0074	0.016868	0.111626		14220	b0074	-0.128462	-0.831207			14220	b0074	-0.129124	-0.834921		14220	b0074	0.0310195	0.20539		14220	b0074	-0.0213793	-0.143142			14220	b0074	0.00822568	0.0514563		14220	b0074	-0.101805	-0.657323		14220	b0074	0.0194265	0.129995
14221	b0075	-0.0568959	-0.391802		14221	b0075	-0.0131932	-0.0891277		14221	b0075	-0.170521	-1.06319			14221	b0075	-0.0706575	-0.482943		14221	b0075	-0.0336856	-0.232576		14221	b0075	0.0923296	0.691064			14221	b0075	0.0603685	0.40458		14221	b0075	-0.0901569	-0.605486		14221	b0075	0.0598082	0.42301
14222	b0076	-0.180701	-1.34586		14222	b0076	-0.256439	-1.9324		14222	b0076	-0.240941	-1.75739			14222	b0076	-0.159295	-1.20527		14222	b0076	-0.0889848	-0.659856		14222	b0076	-0.19068	-1.4297			14222	b0076	-0.192015	-1.39236		14222	b0076	-0.14751	-1.10589		14222	b0076	-0.179623	-1.31384
14224	b0078	-0.18464	-1.17824		14224	b0078	-0.546971	-3.51586		14224	b0078	-0.851243	-5.37722			14224	b0078	-0.219264	-1.5161		14224	b0078	-0.37195	-2.30309		14224	b0078	-0.2775	-1.83288			14224	b0078	-0.200835	-1.15781		14224	b0078	-0.352434	-2.2217		14224	b0078	-0.264683	-1.80659
14227	b0081	-0.026713	-0.112134		14227	b0081	0.0875237	0.398124		14227	b0081	0.0366144	0.170729			14227	b0081	-0.0960105	-0.390554		14227	b0081	-0.0272372	-0.109991		14227	b0081	0.0578985	0.299303			14227	b0081	0.115782	0.520443		14227	b0081	0.0670106	0.33434		14227	b0081	0.0344419	0.167216
14238	b0092	-0.552857	-2.80059		14238	b0092	-0.888171	-4.09234		14238	b0092	-0.67337	-3.40328			14238	b0092	-0.506226	-2.59967		14238	b0092	-0.934486	-4.17593		14238	b0092	-0.525469	-3.06681			14238	b0092	-0.426188	-1.99049		14238	b0092	-0.502666	-2.68542		14238	b0092	-0.498299	-2.27664
14243	b0097	0.118406	0.387643		14243	b0097	-0.0545646	-0.172182		14243	b0097	0.0818121	0.230861			14243	b0097	0.215585	0.692373		14243	b0097	0.240474	0.747281		14243	b0097	0.351591	1.12586			14243	b0097	0.106876	0.346295		14243	b0097	0.266874	0.884421		14243	b0097	0.283926	0.835129
14245	b0099	0.0877634	0.281331		14245	b0099	-0.0762933	-0.298857		14245	b0099	-0.158707	-0.610424			14245	b0099	-0.161216	-0.503258		14245	b0099	-0.112879	-0.354557		14245	b0099	0.0102816	0.0390462			14245	b0099	0.154104	0.501847		14245	b0099	-0.0645431	-0.200939		14245	b0099	0.163608	0.475915
14247	b0101	0.400638	0.78069		14247	b0101	0.607735	1.541		14247	b0101	0.601836	1.47736			14247	b0101	0.713114	2.00437		14247	b0101	0.494445	1.17593		14247	b0101	0.41744	0.846673			14247	b0101	0.436814	0.870528		14247	b0101	0.467489	1.31925		14247	b0101	0.70286	1.6721
14248	b0102	-0.0704448	-0.311573		14248	b0102	-0.0866196	-0.399007		14248	b0102	0.00899175	0.0370003			14248	b0102	0.0209576	0.081296		14248	b0102	-0.0655291	-0.293957		14248	b0102	-0.0738756	-0.281469			14248	b0102	-0.100432	-0.43898		14248	b0102	0.0129777	0.0647604		14248	b0102	0.00447289	0.0188053
14250	b0104	-0.128454	-0.79596		14250	b0104	-0.0541253	-0.359103		14250	b0104	-0.104221	-0.623229			14250	b0104	-0.182732	-1.00797		14250	b0104	0.078057	0.510345		14250	b0104	0.0482797	0.329686			14250	b0104	-0.335085	-1.95976		14250	b0104	-0.16221	-0.92348		14250	b0104	-0.0388416	-0.232621
14252	b0106	-0.0109496	-0.0750152		14252	b0106	-0.0731161	-0.454781		14252	b0106	-0.0907559	-0.588297			14252	b0106	-0.0928345	-0.594457		14252	b0106	-0.0311521	-0.207349		14252	b0106	0.0285026	0.189152			14252	b0106	-0.132343	-0.79591		14252	b0106	-0.057189	-0.388226		14252	b0106	-0.0032875	-0.0219765
14253	b0107	0.0946606	0.548394		14253	b0107	0.0509742	0.310083		14253	b0107	0.186642	1.06735			14253	b0107	0.143949	0.834139		14253	b0107	0.110386	0.635642		14253	b0107	0.218765	1.26305			14253	b0107	-0.0792226	-0.464809		14253	b0107	0.0260093	0.163714		14253	b0107	0.212215	1.24193
14254	b0108	-0.147927	-0.448431		14254	b0108	-0.186288	-0.589174		14254	b0108	-0.142139	-0.507675			14254	b0108	-0.250552	-0.659362		14254	b0108	-0.0379833	-0.103226		14254	b0108	-0.214617	-0.685901			14254	b0108	-0.252253	-0.654109		14254	b0108	-0.235122	-0.678473		14254	b0108	-0.0599398	-0.16742
14255	b0109	0.00146655	0.00678305		14255	b0109	0.0175033	0.08267		14255	b0109	-0.0275446	-0.132919			14255	b0109	-0.0672868	-0.31682		14255	b0109	-0.0644979	-0.349611		14255	b0109	0.142317	0.727128			14255	b0109	-0.282881	-1.35406		14255	b0109	-0.073571	-0.36713		14255	b0109	-0.0635861	-0.271828
14256	b0110	-0.122892	-0.517592		14256	b0110	-0.16483	-0.762049		14256	b0110	-0.220795	-0.891214			14256	b0110	-0.262087	-1.07907		14256	b0110	-0.099578	-0.4409		14256	b0110	-0.0166969	-0.0787575			14256	b0110	-0.0556911	-0.261265		14256	b0110	-0.205816	-0.8575		14256	b0110	0.0747106	0.339207
14257	b0111	-0.348996	-2.29457		14257	b0111	-0.274811	-1.92317		14257	b0111	-0.254853	-1.62467			14257	b0111	-0.42493	-2.81347		14257	b0111	-0.2407	-1.65182		14257	b0111	-0.208333	-1.4368			14257	b0111	-0.354432	-2.5777		14257	b0111	-0.225355	-1.39579		14257	b0111	-0.179895	-1.29992
14258	b0112	-0.0359561	-0.248478		14258	b0112	0.0025983	0.0185122		14258	b0112	-0.0188228	-0.134134			14258	b0112	-0.0577423	-0.404181		14258	b0112	0.0538624	0.377671		14258	b0112	0.0592715	0.417143			14258	b0112	-0.0164414	-0.10795		14258	b0112	-0.0497585	-0.324425		14258	b0112	0.0971646	0.654235
14259	b0113	-1.33027	-2.86043		14259	b0113	-1.13497	-3.37414		14259	b0113	-1.22493	-2.73033			14259	b0113	-0.884565	-2.08953		14259	b0113	-0.710912	-1.64088		14259	b0113	-0.974762	-2.15641			14259	b0113	-1.08335	-2.00285		14259	b0113	-1.21832	-3.6263		14259	b0113	-1.04862	-2.68618
14263	b0117	0.0376859	0.28854		14263	b0117	-0.00436931	-0.0340175		14263	b0117	-0.0414193	-0.320922			14263	b0117	-0.0567465	-0.440165		14263	b0117	0.00364074	0.0288586		14263	b0117	0.0425937	0.336545			14263	b0117	-0.00650655	-0.0493638		14263	b0117	-0.00542326	-0.0423087		14263	b0117	0.0380037	0.294835
14265	b0119	-0.296827	-1.66282		14265	b0119	-0.269779	-1.49483		14265	b0119	-0.237414	-1.19618			14265	b0119	-0.212588	-1.08858		14265	b0119	-0.0996887	-0.603649		14265	b0119	-0.133441	-0.761915			14265	b0119	-0.208453	-1.20701		14265	b0119	-0.160262	-0.839703		14265	b0119	-0.15976	-0.931288
14266	b0120	-0.321616	-1.9757		14266	b0120	-0.167262	-1.13712		14266	b0120	-0.268948	-1.66892			14266	b0120	-0.386957	-2.4135		14266	b0120	-0.267625	-1.67257		14266	b0120	-0.201487	-1.23675			14266	b0120	-0.16419	-0.9385		14266	b0120	-0.275462	-1.71747		14266	b0120	-0.206796	-1.31266
14267	b0121	-0.192929	-0.831302		14267	b0121	-0.423587	-2.1185		14267	b0121	-0.295348	-1.40958			14267	b0121	-0.353331	-1.90613		14267	b0121	-0.309052	-1.67036		14267	b0121	-0.186647	-0.894059			14267	b0121	-0.370854	-1.80668		14267	b0121	-0.30439	-1.50028		14267	b0121	-0.263362	-1.25497
14268	b0122	0.202024	1.10099		14268	b0122	0.127717	0.445863		14268	b0122	0.0237896	0.0893248			14268	b0122	0.111388	0.617544		14268	b0122	-0.117435	-0.387527		14268	b0122	0.199725	0.899442			14268	b0122	0.0440187	0.156966		14268	b0122	-0.00200117	-0.00899465		14268	b0122	0.379417	1.60332
14269	b0123	-0.342021	-2.02282		14269	b0123	-0.394164	-2.28783		14269	b0123	-0.311863	-1.93144			14269	b0123	-0.3389	-2.01144		14269	b0123	-0.377702	-2.2984		14269	b0123	-0.305486	-1.87926			14269	b0123	-0.345032	-1.93848		14269	b0123	-0.334179	-1.9263		14269	b0123	-0.227351	-1.26611
14270	b0124	-0.052989	-0.419168		14270	b0124	-0.0697211	-0.565011		14270	b0124	-0.0370073	-0.30273			14270	b0124	-0.0279724	-0.21582		14270	b0124	0.015164	0.114215		14270	b0124	0.0783334	0.626672			14270	b0124	-0.0843514	-0.680358		14270	b0124	-0.0173319	-0.136861		14270	b0124	0.0336263	0.259808
14271	b0125	-0.370499	-0.752781		14271	b0125	-0.238789	-0.471168		14271	b0125	-0.653179	-1.34672			14271	b0125	-0.407026	-0.947443		14271	b0125	-0.688745	-1.72647		14271	b0125	-0.613582	-1.32458			14271	b0125	-0.274333	-0.677284		14271	b0125	-0.576595	-1.37138		14271	b0125	-0.507306	-1.33915
14273	b0127	-0.251245	-0.928215		14273	b0127	-0.384665	-1.39243		14273	b0127	-0.3173	-1.21375			14273	b0127	-0.335535	-1.3758		14273	b0127	-0.383243	-1.48131		14273	b0127	-0.228713	-1.0785			14273	b0127	-0.284178	-0.964622		14273	b0127	-0.320397	-1.12287		14273	b0127	-0.189222	-0.728456
14274	b0128	-0.0894924	-0.487594		14274	b0128	-0.199357	-0.999501		14274	b0128	-0.164794	-0.957656			14274	b0128	-0.143322	-0.918256		14274	b0128	-0.242066	-1.33306		14274	b0128	-0.0125726	-0.0667417			14274	b0128	-0.157108	-0.894219		14274	b0128	-0.176496	-1.03428		14274	b0128	-0.0992154	-0.524406
14275	b0129	0.354432	1.66497		14275	b0129	0.399725	2.10544		14275	b0129	0.411859	1.91436			14275	b0129	0.328213	1.76303		14275	b0129	0.451822	2.09386		14275	b0129	0.463572	2.41663			14275	b0129	0.367793	1.50591		14275	b0129	0.447233	2.06352		14275	b0129	0.434666	2.30576
14276	b0130	-0.123922	-0.747898		14276	b0130	-0.143751	-0.908071		14276	b0130	-0.108256	-0.647839			14276	b0130	-0.20768	-1.23586		14276	b0130	-0.13735	-0.808485		14276	b0130	-0.00657498	-0.0404085			14276	b0130	-0.100352	-0.595339		14276	b0130	-0.101545	-0.609797		14276	b0130	-0.0629208	-0.375536
14277	b0131	-0.06195	-0.16867		14277	b0131	0.00820432	0.0227205		14277	b0131	0.0192705	0.0514994			14277	b0131	0.113017	0.299711		14277	b0131	-0.267582	-0.641094		14277	b0131	0.00557445	0.0161201			14277	b0131	0.03056	0.0998565		14277	b0131	-0.198135	-0.600771		14277	b0131	0.0672494	0.179398
14278	b0132	0.00929358	0.06001		14278	b0132	-0.0109884	-0.0730483		14278	b0132	-0.000229025	-0.00150641			14278	b0132	0.0426802	0.315641		14278	b0132	0.0990148	0.668187		14278	b0132	0.137473	0.931382			14278	b0132	-0.0421421	-0.290179		14278	b0132	0.0234855	0.157111		14278	b0132	0.159091	1.14848
14279	b0133	0.0682721	0.416152		14279	b0133	0.109693	0.725721		14279	b0133	0.0553065	0.347027			14279	b0133	0.0279321	0.165287		14279	b0133	0.127493	0.720653		14279	b0133	0.17375	1.01692			14279	b0133	0.0518055	0.311073		14279	b0133	0.085178	0.566683		14279	b0133	0.109259	0.639426
14280	b0134	-0.171476	-0.875586		14280	b0134	-0.148916	-0.884156		14280	b0134	-0.359342	-1.776			14280	b0134	-0.139704	-0.722084		14280	b0134	-0.137123	-0.760749		14280	b0134	-0.0391502	-0.23305			14280	b0134	-0.172753	-1.14566		14280	b0134	-0.148951	-0.858543		14280	b0134	-0.0442163	-0.23153
14281	b0135	-0.218653	-1.41918		14281	b0135	-0.197089	-1.27498		14281	b0135	-0.171908	-1.13663			14281	b0135	-0.233496	-1.52388		14281	b0135	-0.0739561	-0.470682		14281	b0135	-0.120842	-0.794323			14281	b0135	-0.142068	-0.964449		14281	b0135	-0.178872	-1.22389		14281	b0135	-0.117823	-0.769478
14283	b0137	-0.151583	-0.776001		14283	b0137	-0.31445	-1.53127		14283	b0137	-0.241179	-1.25721			14283	b0137	-0.250428	-1.22813		14283	b0137	-0.155833	-0.80154		14283	b0137	-0.203622	-1.04459			14283	b0137	-0.29371	-1.49108		14283	b0137	-0.242475	-1.32489		14283	b0137	-0.249547	-1.28047
14284	b0138	-0.621212	-3.08504		14284	b0138	-0.771661	-4.01707		14284	b0138	-0.604642	-3.09795			14284	b0138	-0.598272	-2.84397		14284	b0138	-0.361608	-1.73841		14284	b0138	-0.560552	-2.86324			14284	b0138	-0.541042	-3.14269		14284	b0138	-0.729712	-3.632		14284	b0138	-0.508948	-2.71951
14285	b0139	-0.128892	-1.13947		14285	b0139	-0.144016	-1.28219		14285	b0139	-0.159569	-1.42287			14285	b0139	-0.15611	-1.39271		14285	b0139	-0.125208	-1.09703		14285	b0139	-0.0466086	-0.414287			14285	b0139	-0.134963	-1.17478		14285	b0139	-0.129803	-1.15231		14285	b0139	-0.0457788	-0.403608
14286	b0140	-0.148278	-1.08973		14286	b0140	-0.105206	-0.807873		14286	b0140	-0.108225	-0.809212			14286	b0140	-0.14881	-1.0759		14286	b0140	-0.0579897	-0.434178		14286	b0140	-0.023211	-0.173662			14286	b0140	-0.103351	-0.793336		14286	b0140	-0.0707794	-0.565442		14286	b0140	-0.0182253	-0.139703
14287	b0141	-0.631546	-2.65672		14287	b0141	-0.722539	-3.19501		14287	b0141	-0.690413	-3.32521			14287	b0141	-0.572373	-2.32796		14287	b0141	-0.476613	-1.97499		14287	b0141	-0.569254	-2.47882			14287	b0141	-0.575437	-2.30685		14287	b0141	-0.58551	-2.45597		14287	b0141	-0.762918	-3.46433
14289	b0143	-0.68113	-1.49164		14289	b0143	-0.630346	-1.6396		14289	b0143	-0.516262	-1.09619			14289	b0143	-0.445454	-1.213		14289	b0143	-0.832544	-2.23029		14289	b0143	-0.621754	-1.54034			14289	b0143	-0.695073	-1.6439		14289	b0143	-0.692137	-1.40813		14289	b0143	-0.466564	-1.24072
14290	b0144	0.0244465	0.132823		14290	b0144	-0.050355	-0.265578		14290	b0144	-0.164122	-0.887096			14290	b0144	-0.0474297	-0.240394		14290	b0144	-0.03411	-0.183935		14290	b0144	0.00489412	0.0254177			14290	b0144	-0.239144	-1.03933		14290	b0144	-0.0506726	-0.263254		14290	b0144	0.0218022	0.123224
14292	b0146	0.0290408	0.168859		14292	b0146	-0.00370089	-0.0233259		14292	b0146	-0.0821902	-0.516159			14292	b0146	-0.158786	-0.918343		14292	b0146	0.0846856	0.489751		14292	b0146	0.127525	0.7711			14292	b0146	-0.139587	-0.860945		14292	b0146	-0.0582809	-0.373965		14292	b0146	0.104638	0.601212
14293	b0147	0.102419	0.52882		14293	b0147	0.218551	1.18656		14293	b0147	0.221534	1.04341			14293	b0147	0.070891	0.384118		14293	b0147	0.25991	1.44097		14293	b0147	0.372499	1.81902			14293	b0147	0.138321	0.681989		14293	b0147	0.176967	0.939903		14293	b0147	0.202805	0.979016
14294	b0148	-0.140066	-1.05039		14294	b0148	-0.061154	-0.442191		14294	b0148	-0.0877622	-0.64656			14294	b0148	-0.0954793	-0.754366		14294	b0148	0.0268152	0.211183		14294	b0148	0.00575323	0.0439061			14294	b0148	-0.0801188	-0.590821		14294	b0148	-0.0435175	-0.336804		14294	b0148	0.0687527	0.528729
14295	b0149	-1.11533	-6.39398		14295	b0149	-1.56695	-9.22298		14295	b0149	-1.66154	-10.2602			14295	b0149	-0.906565	-5.12303		14295	b0149	-1.72902	-9.35341		14295	b0149	-1.51533	-9.15323			14295	b0149	-0.947315	-5.16625		14295	b0149	-1.04959	-6.78955		14295	b0149	-1.17455	-6.73414
14296	b0150	0.00267938	0.021255		14296	b0150	-0.108441	-0.86456		14296	b0150	-0.14668	-1.158			14296	b0150	-0.0285674	-0.230329		14296	b0150	-0.0394158	-0.308276		14296	b0150	0.0663341	0.515761			14296	b0150	0.00926253	0.0740084		14296	b0150	-0.0271635	-0.212017		14296	b0150	0.0512655	0.400586
14297	b0151	-0.364382	-1.90635		14297	b0151	-0.469429	-2.78561		14297	b0151	-0.404425	-2.04067			14297	b0151	-0.211505	-1.08345		14297	b0151	-0.42464	-2.5252		14297	b0151	-0.266343	-1.64964			14297	b0151	-0.211394	-1.02303		14297	b0151	-0.214215	-1.10861		14297	b0151	-0.36876	-1.88654
14298	b0152	-0.10234	-0.496743		14298	b0152	-0.181872	-0.826238		14298	b0152	-0.197929	-0.856055			14298	b0152	0.00616759	0.0311939		14298	b0152	-0.169544	-0.936505		14298	b0152	-0.034822	-0.183961			14298	b0152	-0.119691	-0.599176		14298	b0152	-0.119057	-0.577735		14298	b0152	-0.0563143	-0.276276
14299	b0153	-0.155999	-1.15773		14299	b0153	-0.173645	-1.26219		14299	b0153	-0.230017	-1.68202			14299	b0153	-0.144724	-1.05469		14299	b0153	-0.153621	-1.14589		14299	b0153	-0.0266703	-0.19355			14299	b0153	-0.139061	-0.946537		14299	b0153	-0.0517661	-0.372952		14299	b0153	-0.0876745	-0.610376
14301	b0155	-0.200714	-1.35574		14301	b0155	-0.183174	-1.20784		14301	b0155	-0.164059	-1.11026			14301	b0155	-0.228615	-1.45377		14301	b0155	-0.18042	-1.18002		14301	b0155	-0.0767292	-0.523478			14301	b0155	-0.189077	-1.2996		14301	b0155	-0.0989232	-0.670811		14301	b0155	-0.106522	-0.721773
14303	b0157	-0.279264	-1.18416		14303	b0157	-0.424861	-1.76105		14303	b0157	-0.245099	-1.28712			14303	b0157	-0.376686	-1.7418		14303	b0157	-0.343023	-1.63341		14303	b0157	-0.154588	-0.667475			14303	b0157	-0.599166	-2.91207		14303	b0157	-0.319882	-1.43187		14303	b0157	-0.344168	-1.50571
14304	b0158	-0.136806	-0.692267		14304	b0158	-0.195592	-0.833474		14304	b0158	-0.296563	-1.5204			14304	b0158	-0.290277	-1.36374		14304	b0158	-0.296483	-1.2803		14304	b0158	-0.0451667	-0.224252			14304	b0158	-0.323118	-1.89053		14304	b0158	-0.161805	-0.969765		14304	b0158	-0.0179062	-0.113356
14306	b0160	-0.186474	-1.66769		14306	b0160	-0.179074	-1.59092		14306	b0160	-0.151753	-1.35722			14306	b0160	-0.229519	-2.03942		14306	b0160	-0.180688	-1.62817		14306	b0160	-0.0359179	-0.322305			14306	b0160	-0.22573	-1.97366		14306	b0160	-0.190423	-1.71434		14306	b0160	-0.0689473	-0.617388
14307	b0161	-0.195726	-0.784582		14307	b0161	-0.197283	-0.868886		14307	b0161	-0.259845	-1.30722			14307	b0161	-0.249194	-1.30397		14307	b0161	-0.422446	-1.80746		14307	b0161	-0.0527925	-0.261153			14307	b0161	-0.616989	-2.47023		14307	b0161	-0.169193	-0.883047		14307	b0161	-0.206257	-0.87605
14308	b0162	0.209741	1.10508		14308	b0162	0.0243799	0.141595		14308	b0162	0.168475	0.907265			14308	b0162	0.12636	0.703209		14308	b0162	0.108266	0.628836		14308	b0162	0.334073	1.98804			14308	b0162	0.265664	1.58173		14308	b0162	0.211986	1.25968		14308	b0162	0.241227	1.40822
14309	b0163	-0.254661	-1.14613		14309	b0163	-0.130397	-0.628353		14309	b0163	-0.208309	-0.784724			14309	b0163	-0.279045	-1.15825		14309	b0163	-0.121678	-0.574285		14309	b0163	-0.0226829	-0.100365			14309	b0163	-0.160753	-0.775294		14309	b0163	-0.215807	-0.816226		14309	b0163	-0.276007	-1.26712
14310	b0164	-0.237724	-1.26647		14310	b0164	-0.355842	-1.82675		14310	b0164	-0.394295	-1.65597			14310	b0164	-0.315126	-1.32341		14310	b0164	-0.424458	-2.0558		14310	b0164	-0.125015	-0.58955			14310	b0164	-0.271143	-1.24943		14310	b0164	-0.271975	-1.04239		14310	b0164	-0.242379	-1.01143
14313	b0167	-0.340383	-0.719035		14313	b0167	-0.147257	-0.314818		14313	b0167	0.0539084	0.123719			14313	b0167	-0.392067	-0.786221		14313	b0167	-0.428263	-1.06502		14313	b0167	-0.247512	-0.52418			14313	b0167	-0.0223296	-0.0459981		14313	b0167	-0.0109	-0.0208506		14313	b0167	-0.315526	-0.650478
14324	b0178	0.356592	1.04362		14324	b0178	0.232465	0.765233		14324	b0178	0.316008	1.01847			14324	b0178	0.417489	1.34696		14324	b0178	0.357821	1.17808		14324	b0178	0.501545	1.47942			14324	b0178	0.258469	0.759554		14324	b0178	0.393222	1.28144		14324	b0178	0.432245	1.44201
14329	b0183	0.103301	0.378966		14329	b0183	0.457772	1.73352		14329	b0183	0.436647	1.58583			14329	b0183	0.319539	1.14813		14329	b0183	0.513123	2.26284		14329	b0183	0.526877	2.47538			14329	b0183	0.19015	0.744982		14329	b0183	0.352115	1.44029		14329	b0183	0.478747	1.81672
14332	b0186	0.0161062	0.118578		14332	b0186	-0.107479	-0.768204		14332	b0186	-0.0944213	-0.640049			14332	b0186	-0.0715341	-0.514246		14332	b0186	-0.0417359	-0.306354		14332	b0186	0.0858604	0.607771			14332	b0186	-0.141786	-0.90952		14332	b0186	0.0112146	0.0813908		14332	b0186	0.0196437	0.137551
14333	b0187	-0.143197	-0.566065		14333	b0187	0.0347897	0.169646		14333	b0187	0.0495936	0.237972			14333	b0187	-0.0479172	-0.205614		14333	b0187	0.040136	0.194713		14333	b0187	0.153099	0.741285			14333	b0187	-0.0372542	-0.173781		14333	b0187	0.187898	0.975131		14333	b0187	0.0970986	0.450126
14335	b0189	-0.499473	-1.6142		14335	b0189	-0.539521	-1.61032		14335	b0189	-0.599547	-2.24018			14335	b0189	-0.351118	-1.24021		14335	b0189	-0.584642	-1.97679		14335	b0189	-0.41581	-1.37728			14335	b0189	-0.663021	-2.4454		14335	b0189	-0.48336	-1.4878		14335	b0189	-0.587073	-2.00464
14336	b0190	0.258319	1.6208		14336	b0190	0.373067	2.37098		14336	b0190	0.222788	1.44225			14336	b0190	0.158126	0.856512		14336	b0190	0.335281	2.09947		14336	b0190	0.431233	2.78568			14336	b0190	0.195844	1.1286		14336	b0190	0.348527	2.21075		14336	b0190	0.325731	2.12126
14337	b0191	0.359035	1.2101		14337	b0191	0.353073	1.32796		14337	b0191	0.274673	0.917253			14337	b0191	0.205072	0.647688		14337	b0191	0.324021	0.906015		14337	b0191	0.630647	2.28191			14337	b0191	0.2729	0.95634		14337	b0191	0.557287	2.08079		14337	b0191	0.385162	1.31349
14338	b0192	-0.134433	-0.60435		14338	b0192	-0.150106	-0.704244		14338	b0192	-0.279954	-1.31781			14338	b0192	-0.164198	-0.751799		14338	b0192	-0.0717334	-0.313912		14338	b0192	-0.17955	-0.835254			14338	b0192	-0.142855	-0.650192		14338	b0192	-0.0396274	-0.184408		14338	b0192	0.00911442	0.0464914
14339	b0193	-0.00743531	-0.0423927		14339	b0193	-0.154126	-0.886517		14339	b0193	-0.0397939	-0.226637			14339	b0193	-0.0198766	-0.119385		14339	b0193	-0.0623561	-0.312289		14339	b0193	0.158464	0.95096			14339	b0193	-0.170218	-0.955137		14339	b0193	-0.0131459	-0.0751242		14339	b0193	0.0671568	0.400449
14341	b0195	0.459981	2.1093		14341	b0195	0.368071	1.74271		14341	b0195	0.266849	1.33497			14341	b0195	0.201505	1.05196		14341	b0195	0.247279	1.07336		14341	b0195	0.406579	2.0666			14341	b0195	0.411294	1.9824		14341	b0195	0.303241	1.6228		14341	b0195	0.247333	1.19316
14342	b0196	0.168065	0.76435		14342	b0196	0.212545	0.798686		14342	b0196	0.0996841	0.419164			14342	b0196	0.182519	0.826823		14342	b0196	0.306874	1.30126		14342	b0196	0.196723	0.881697			14342	b0196	0.238044	0.971551		14342	b0196	0.168303	0.701539		14342	b0196	0.22324	0.966343
14343	b0197	-0.429011	-2.04118		14343	b0197	-0.398376	-2.13632		14343	b0197	-0.467544	-2.6537			14343	b0197	-0.324821	-1.86011		14343	b0197	-0.530634	-3.10144		14343	b0197	-0.507094	-2.5903			14343	b0197	-0.543708	-2.63946		14343	b0197	-0.434377	-2.60425		14343	b0197	-0.441633	-2.33355
14344	b0198	0.0203629	0.141494		14344	b0198	0.0682319	0.434295		14344	b0198	0.0598734	0.400919			14344	b0198	-0.0507346	-0.340442		14344	b0198	-0.0214709	-0.136766		14344	b0198	0.129935	0.878198			14344	b0198	-0.00910899	-0.0603284		14344	b0198	0.143947	1.05046		14344	b0198	0.068516	0.436139
14345	b0199	0.221252	1.65515		14345	b0199	0.269821	2.10048		14345	b0199	0.175933	1.27216			14345	b0199	0.117482	0.830536		14345	b0199	0.262773	2.11037		14345	b0199	0.282484	2.24202			14345	b0199	0.16745	1.27843		14345	b0199	0.25788	1.95142		14345	b0199	0.2956	2.29621
14347	b0207	-0.114844	-0.674194		14347	b0207	-0.287819	-1.64598		14347	b0207	-0.251672	-1.47563			14347	b0207	-0.241004	-1.34574		14347	b0207	-0.249454	-1.35737		14347	b0207	-0.15454	-0.935892			14347	b0207	-0.07333	-0.456357		14347	b0207	-0.14541	-0.898352		14347	b0207	-0.231443	-1.40265
14348	b0208	-0.0718985	-0.387448		14348	b0208	-0.157163	-0.911215		14348	b0208	-0.114648	-0.574106			14348	b0208	-0.118641	-0.644604		14348	b0208	0.00783455	0.0425568		14348	b0208	-0.0351727	-0.173575			14348	b0208	-0.133933	-0.62049		14348	b0208	-0.0345437	-0.172218		14348	b0208	-0.011437	-0.0631512
14349	b0209	0.0366386	0.216694		14349	b0209	0.131358	0.78688		14349	b0209	-0.0419345	-0.248772			14349	b0209	0.00624463	0.0377476		14349	b0209	-0.0136844	-0.080437		14349	b0209	0.0575245	0.360562			14349	b0209	0.105875	0.521709		14349	b0209	0.142605	0.887544		14349	b0209	0.249208	1.3632
14350	b0210	0.0704373	0.291285		14350	b0210	0.0923148	0.366774		14350	b0210	0.0614731	0.296117			14350	b0210	-0.141528	-0.651798		14350	b0210	0.177133	0.800496		14350	b0210	0.237383	1.11856			14350	b0210	-0.0677871	-0.238404		14350	b0210	0.222594	0.844441		14350	b0210	0.128155	0.539977
14351	b0211	-0.0726059	-0.447868		14351	b0211	-0.04628	-0.287991		14351	b0211	-0.138949	-0.811624			14351	b0211	-0.0437453	-0.252397		14351	b0211	-0.0212163	-0.125984		14351	b0211	0.0269013	0.139418			14351	b0211	-0.0119098	-0.0764863		14351	b0211	0.099773	0.645144		14351	b0211	0.0470657	0.284127
14352	b0212	-0.817707	-1.74676		14352	b0212	-0.811089	-1.95849		14352	b0212	-0.790885	-1.92466			14352	b0212	-1.00473	-2.68544		14352	b0212	-0.77342	-1.86138		14352	b0212	-0.686508	-1.85778			14352	b0212	-0.704677	-1.23403		14352	b0212	-0.879986	-2.29779		14352	b0212	-0.688183	-1.80725
14353	b0213	0.00140656	0.00589924		14353	b0213	0.0154144	0.0597585		14353	b0213	0.0434203	0.193573			14353	b0213	-0.0811631	-0.322299		14353	b0213	-0.00840775	-0.0316095		14353	b0213	0.0052096	0.0223162			14353	b0213	-0.0817308	-0.324781		14353	b0213	-0.0414872	-0.173056		14353	b0213	-0.0767093	-0.346172
14356	b0217	0.0180612	0.0591166		14356	b0217	-0.173045	-0.54193		14356	b0217	-0.180015	-0.564092			14356	b0217	-0.166114	-0.610335		14356	b0217	-0.0691366	-0.231547		14356	b0217	-0.128109	-0.428825			14356	b0217	-0.0226727	-0.0549304		14356	b0217	0.0196268	0.0572026		14356	b0217	-0.0734717	-0.292716
14358	b0219	-0.0449469	-0.181604		14358	b0219	-0.286288	-1.00356		14358	b0219	-0.0627373	-0.188145			14358	b0219	0.0493077	0.196684		14358	b0219	-0.0455111	-0.128434		14358	b0219	-0.00932881	-0.0309032			14358	b0219	0.134096	0.463967		14358	b0219	-0.16886	-0.588167		14358	b0219	-0.230914	-0.761789
14359	b0220	0.100008	0.505002		14359	b0220	-0.0688497	-0.332124		14359	b0220	0.00166376	0.0069345			14359	b0220	-0.00931823	-0.0445089		14359	b0220	0.0316382	0.183411		14359	b0220	-0.00194592	-0.00860374			14359	b0220	-0.100894	-0.477047		14359	b0220	0.0824905	0.493797		14359	b0220	0.0353441	0.158804
14360	b0221	0.0593799	0.415326		14360	b0221	0.00366116	0.026055		14360	b0221	-0.0195715	-0.136779			14360	b0221	-0.00896284	-0.0640562		14360	b0221	0.023506	0.170081		14360	b0221	0.0615454	0.445179			14360	b0221	-0.0434157	-0.309477		14360	b0221	0.0449394	0.324865		14360	b0221	-0.0135345	-0.0948072
14362	b0223	0.282899	1.50255		14362	b0223	0.124754	0.620433		14362	b0223	0.0242977	0.123917			14362	b0223	-0.00167416	-0.00748414		14362	b0223	0.0801227	0.477015		14362	b0223	0.15835	0.819328			14362	b0223	0.175891	0.816525		14362	b0223	0.0542561	0.270817		14362	b0223	0.0831816	0.439611
14363	b0224	0.0645446	0.39238		14363	b0224	-0.0553857	-0.316593		14363	b0224	0.0463281	0.27469			14363	b0224	0.093886	0.548077		14363	b0224	0.107642	0.640936		14363	b0224	0.0695811	0.39207			14363	b0224	-0.0216179	-0.126276		14363	b0224	0.0727185	0.42136		14363	b0224	0.0941761	0.568444
14364	b0225	-0.797918	-2.70697		14364	b0225	-0.973263	-2.39233		14364	b0225	-0.744136	-1.88578			14364	b0225	-0.933064	-3.4275		14364	b0225	-0.469158	-1.8966		14364	b0225	-0.44645	-2.01461			14364	b0225	-1.10206	-3.53565		14364	b0225	-0.561199	-2.11746		14364	b0225	-0.52887	-2.26657
14365	b0226	-0.299553	-0.812136		14365	b0226	-0.619032	-1.66849		14365	b0226	-0.860196	-2.84562			14365	b0226	-0.459788	-1.58538		14365	b0226	-0.409217	-1.30579		14365	b0226	-0.700332	-2.5895			14365	b0226	-0.661474	-2.01325		14365	b0226	-0.835708	-2.74156		14365	b0226	-0.568766	-2.19616
14366	b0227	0.210657	0.84815		14366	b0227	0.277756	1.18503		14366	b0227	0.176541	0.788733			14366	b0227	0.195562	0.978759		14366	b0227	-0.0789884	-0.333631		14366	b0227	0.317258	1.60673			14366	b0227	0.244773	1.09945		14366	b0227	0.286928	1.35393		14366	b0227	0.181528	0.791619
14367	b0228	0.160952	0.723548		14367	b0228	-0.0986179	-0.435701		14367	b0228	0.0576303	0.260913			14367	b0228	-0.0680682	-0.27768		14367	b0228	-0.178857	-0.750058		14367	b0228	-0.024504	-0.100342			14367	b0228	-0.0497544	-0.173942		14367	b0228	0.0730853	0.257965		14367	b0228	-0.119858	-0.526068
14368	b0229	-0.0267201	-0.16629		14368	b0229	-0.226933	-1.17027		14368	b0229	-0.11514	-0.617345			14368	b0229	-0.0296864	-0.169609		14368	b0229	0.026754	0.140417		14368	b0229	-0.0346101	-0.203298			14368	b0229	-0.0965847	-0.509163		14368	b0229	-0.12948	-0.748541		14368	b0229	-0.0695986	-0.358685
14369	b0230	0.160711	0.828276		14369	b0230	0.0549173	0.279762		14369	b0230	0.178873	0.975295			14369	b0230	0.161545	0.777085		14369	b0230	0.0878892	0.487319		14369	b0230	0.0948588	0.504783			14369	b0230	0.0242647	0.117955		14369	b0230	0.223844	1.23762		14369	b0230	0.164138	0.877939
14370	b0231	0.0305455	0.159602		14370	b0231	0.0387417	0.190783		14370	b0231	0.0410213	0.208574			14370	b0231	0.0109967	0.0640799		14370	b0231	0.0027227	0.0143187		14370	b0231	0.105886	0.572515			14370	b0231	0.0325557	0.171193		14370	b0231	0.0638878	0.325889		14370	b0231	-0.113171	-0.531702
14372	b0233	-0.220408	-0.907762		14372	b0233	-0.142878	-0.541284		14372	b0233	-0.00526076	-0.0213004			14372	b0233	-0.247216	-1.00502		14372	b0233	-0.0873949	-0.352099		14372	b0233	-0.340467	-1.42152			14372	b0233	-0.27315	-1.05433		14372	b0233	-0.112136	-0.481205		14372	b0233	-0.191429	-0.692844
14374	b0235	0.14939	0.915128		14374	b0235	0.0492846	0.300052		14374	b0235	0.04618	0.276191			14374	b0235	0.177164	1.11909		14374	b0235	0.00845018	0.0551868		14374	b0235	0.133034	0.84276			14374	b0235	0.040617	0.238398		14374	b0235	0.159138	0.985402		14374	b0235	0.0148474	0.0864132
14375	b0236	0.0955849	0.267374		14375	b0236	0.144995	0.463512		14375	b0236	-0.111846	-0.370475			14375	b0236	0.234181	0.749817		14375	b0236	0.128698	0.475428		14375	b0236	0.189283	0.705703			14375	b0236	0.274126	0.859489		14375	b0236	0.213312	0.82841		14375	b0236	0.0852287	0.292373
14376	b0237	-0.319232	-1.89744		14376	b0237	-0.230263	-1.38242		14376	b0237	-0.289346	-1.81945			14376	b0237	-0.406721	-2.47311		14376	b0237	-0.228019	-1.35955		14376	b0237	-0.430591	-2.71257			14376	b0237	-0.164773	-1.02901		14376	b0237	-0.337047	-2.11353		14376	b0237	-0.34072	-1.95906
14377	b0238	0.00887379	0.0277037		14377	b0238	0.277335	0.894332		14377	b0238	0.162195	0.545881			14377	b0238	0.296051	0.870387		14377	b0238	0.20612	0.712725		14377	b0238	0.282531	1.12817			14377	b0238	0.333599	0.955019		14377	b0238	0.115594	0.303553		14377	b0238	0.160257	0.526316
14378	b0239	0.0448152	0.222095		14378	b0239	0.0500432	0.256961		14378	b0239	0.0957926	0.480409			14378	b0239	0.00054296	0.00258629		14378	b0239	-0.0351178	-0.184536		14378	b0239	0.0692867	0.349359			14378	b0239	-0.00650589	-0.0312905		14378	b0239	0.0434669	0.213116		14378	b0239	0.0629374	0.302373
14379	b0240	0.0101665	0.061671		14379	b0240	-0.0167692	-0.10499		14379	b0240	-0.0230064	-0.145296			14379	b0240	0.115257	0.754869		14379	b0240	-0.14066	-0.810639		14379	b0240	0.101232	0.655026			14379	b0240	0.131342	0.829459		14379	b0240	0.0731205	0.447309		14379	b0240	0.133539	0.932246
14380	b0241	0.0719104	0.543873		14380	b0241	0.123289	0.966947		14380	b0241	0.151704	1.14772			14380	b0241	0.09785	0.752917		14380	b0241	0.0779784	0.591663		14380	b0241	0.0989517	0.745255			14380	b0241	0.125872	0.939878		14380	b0241	0.114527	0.889695		14380	b0241	0.0870499	0.663227
14381	b0242	0.0313537	0.14472		14381	b0242	-0.0848544	-0.406533		14381	b0242	-0.244838	-1.20749			14381	b0242	-0.0125118	-0.0547694		14381	b0242	0.0849978	0.342579		14381	b0242	0.00368409	0.0165288			14381	b0242	-0.187059	-0.970398		14381	b0242	-0.0677548	-0.325896		14381	b0242	-0.0730827	-0.313638
14382	b0243	-0.282205	-1.40071		14382	b0243	-0.382142	-1.92484		14382	b0243	-0.514485	-2.89377			14382	b0243	-0.238638	-1.28469		14382	b0243	-0.180279	-0.921994		14382	b0243	-0.390583	-1.98912			14382	b0243	-0.257478	-1.26054		14382	b0243	-0.331263	-1.68792		14382	b0243	-0.380398	-1.97029
14383	b0245	0.0906591	0.532156		14383	b0245	0.0429515	0.198482		14383	b0245	0.139128	0.745514			14383	b0245	0.146922	0.741046		14383	b0245	0.108422	0.52135		14383	b0245	0.184927	0.952385			14383	b0245	-0.0321156	-0.140993		14383	b0245	0.196989	0.913019		14383	b0245	0.177977	0.858009
14384	b0246	0.0968399	0.48957		14384	b0246	0.0483769	0.225165		14384	b0246	0.110891	0.541241			14384	b0246	0.146573	0.774019		14384	b0246	0.0430865	0.223375		14384	b0246	0.15	0.689121			14384	b0246	-0.0835918	-0.43561		14384	b0246	-0.00736038	-0.0322665		14384	b0246	0.161539	0.848096
14385	b0247	-1.0663	-1.87077		14385	b0247	-1.09653	-1.89852		14385	b0247	-1.03926	-1.84362			14385	b0247	-0.855626	-1.55388		14385	b0247	-1.04505	-1.73983		14385	b0247	-1.16334	-2.05566			14385	b0247	-1.04115	-1.73455		14385	b0247	-0.710753	-1.36684		14385	b0247	-0.921679	-1.65193
14386	b0248	0.258048	0.685826		14386	b0248	0.315408	0.763779		14386	b0248	0.234811	0.749041			14386	b0248	0.323003	0.882611		14386	b0248	0.206373	0.721575		14386	b0248	0.235498	0.639358			14386	b0248	0.281589	0.715924		14386	b0248	0.333371	0.911663		14386	b0248	0.253514	0.757067
14387	b0249	-0.252192	-0.943925		14387	b0249	-0.416813	-1.08778		14387	b0249	-0.497783	-1.43386			14387	b0249	-0.388838	-1.17015		14387	b0249	-0.619715	-2.07301		14387	b0249	-0.411741	-1.29334			14387	b0249	-0.423141	-1.45668		14387	b0249	-0.410126	-1.52666		14387	b0249	-0.340084	-1.19393
14388	b0250	-0.0115227	-0.037288		14388	b0250	-0.129743	-0.47872		14388	b0250	-0.227353	-0.759442			14388	b0250	0.0246268	0.0844409		14388	b0250	-0.013341	-0.0636824		14388	b0250	-0.0715818	-0.224556			14388	b0250	-0.0651935	-0.215328		14388	b0250	-0.0641644	-0.186708		14388	b0250	0.0153523	0.0553754
14389	b0251	0.616499	1.87683		14389	b0251	0.843281	2.6747		14389	b0251	0.673984	1.89858			14389	b0251	1.17221	3.92694		14389	b0251	0.827189	2.52948		14389	b0251	0.66563	2.11669			14389	b0251	0.840092	2.38732		14389	b0251	0.679865	1.98939		14389	b0251	0.898084	3.16724
14390	b0252	0.354634	1.5576		14390	b0252	0.157816	0.641537		14390	b0252	0.169155	0.643565			14390	b0252	0.295554	1.25601		14390	b0252	0.148479	0.624084		14390	b0252	0.276498	1.1919			14390	b0252	0.289578	1.39831		14390	b0252	0.322965	1.42167		14390	b0252	0.196434	0.781258
14391	b0253	-0.0174387	-0.106865		14391	b0253	-0.00540245	-0.0337353		14391	b0253	0.125045	0.78662			14391	b0253	0.000899898	0.00532843		14391	b0253	-0.019736	-0.129602		14391	b0253	0.0337988	0.198579			14391	b0253	0.0309658	0.182836		14391	b0253	-0.00584413	-0.0341415		14391	b0253	0.00102309	0.00605382
14392	b0254	-0.126414	-0.683596		14392	b0254	-0.0449588	-0.268475		14392	b0254	-0.105032	-0.571966			14392	b0254	-0.143598	-0.733622		14392	b0254	-0.0330582	-0.173694		14392	b0254	-0.0881271	-0.49721			14392	b0254	-0.213537	-1.30369		14392	b0254	-0.00607219	-0.0345899		14392	b0254	-0.116245	-0.708138
14396	b0258	-0.101308	-0.414577		14396	b0258	-0.116915	-0.559308		14396	b0258	0.0032863	0.0159053			14396	b0258	-0.0281216	-0.116051		14396	b0258	-0.0200556	-0.0910909		14396	b0258	-0.0643102	-0.306309			14396	b0258	-0.138652	-0.547933		14396	b0258	-0.100067	-0.491929		14396	b0258	-0.061105	-0.308107
14398	b0260	0.0797288	0.431384		14398	b0260	-0.0801004	-0.417122		14398	b0260	0.0619385	0.340714			14398	b0260	0.016327	0.0938835		14398	b0260	0.0207546	0.110297		14398	b0260	0.0559899	0.307868			14398	b0260	0.178837	0.937229		14398	b0260	0.0285059	0.159913		14398	b0260	-0.041464	-0.218342
14399	b0261	-0.219166	-1.11933		14399	b0261	-0.0186709	-0.0906278		14399	b0261	-0.134489	-0.69421			14399	b0261	-0.0545212	-0.276334		14399	b0261	-0.319398	-1.78674		14399	b0261	-0.169366	-0.907833			14399	b0261	-0.117933	-0.495205		14399	b0261	-0.143453	-0.646967		14399	b0261	-0.183966	-0.953625
14400	b0262	0.283957	1.8954		14400	b0262	0.27182	1.58643		14400	b0262	0.193108	1.29262			14400	b0262	0.315426	1.92986		14400	b0262	0.274225	1.64753		14400	b0262	0.147158	0.794752			14400	b0262	0.154921	0.886776		14400	b0262	0.263209	1.61341		14400	b0262	0.303349	1.96972
14401	b0263	-0.236087	-0.806434		14401	b0263	-0.163214	-0.44959		14401	b0263	-0.151011	-0.5122			14401	b0263	-0.1718	-0.573818		14401	b0263	-0.165589	-0.50275		14401	b0263	-0.557428	-1.8321			14401	b0263	0.0110756	0.0314569		14401	b0263	-0.490119	-1.65067		14401	b0263	-0.0383537	-0.134207
14404	b0266	0.241813	1.55		14404	b0266	0.25573	1.58308		14404	b0266	0.329477	2.01874			14404	b0266	0.32046	1.7371		14404	b0266	0.260781	1.48996		14404	b0266	0.2831	1.60271			14404	b0266	0.101483	0.574048		14404	b0266	0.215493	1.2128		14404	b0266	0.320424	1.89394
14405	b0267	0.0993089	0.686529		14405	b0267	0.209809	1.37624		14405	b0267	0.125977	0.838759			14405	b0267	0.212776	1.42124		14405	b0267	0.085727	0.523195		14405	b0267	0.109253	0.695424			14405	b0267	0.0746936	0.533879		14405	b0267	0.0450245	0.287538		14405	b0267	0.0934005	0.605112
14406	b0268	0.346665	1.55108		14406	b0268	0.577412	2.90784		14406	b0268	0.387215	1.86158			14406	b0268	0.475568	2.40085		14406	b0268	0.350635	1.73777		14406	b0268	0.457187	2.28293			14406	b0268	0.309044	1.4091		14406	b0268	0.413883	2.08682		14406	b0268	0.328233	1.53167
14407	b0269	0.155491	0.877208		14407	b0269	0.119227	0.703407		14407	b0269	0.233606	1.5803			14407	b0269	0.354473	2.3168		14407	b0269	0.128878	0.784933		14407	b0269	0.120735	0.730233			14407	b0269	0.168435	1.07751		14407	b0269	0.159227	1.03381		14407	b0269	0.214965	1.3824
14408	b0270	0.197764	1.07129		14408	b0270	0.155918	0.925513		14408	b0270	0.246604	1.31756			14408	b0270	0.223441	1.2044		14408	b0270	0.0939424	0.540254		14408	b0270	0.0572094	0.332268			14408	b0270	0.0251316	0.136828		14408	b0270	0.173838	1.05646		14408	b0270	0.183422	1.02556
14409	b0271	-0.000253573	-0.00170703		14409	b0271	0.0302289	0.197736		14409	b0271	-0.0484668	-0.33833			14409	b0271	0.0222897	0.145987		14409	b0271	-0.0864815	-0.582984		14409	b0271	-0.110902	-0.679463			14409	b0271	-0.0174965	-0.122602		14409	b0271	0.0306149	0.207053		14409	b0271	0.0397296	0.270292
14410	b0272	0.247069	1.13789		14410	b0272	0.18704	0.839581		14410	b0272	0.229216	1.07306			14410	b0272	0.321459	1.64494		14410	b0272	0.215842	1.11857		14410	b0272	0.213951	1.06237			14410	b0272	0.090314	0.42815		14410	b0272	0.242666	1.32562		14410	b0272	0.332902	1.78814
14411	b0273	0.0346131	0.19437		14411	b0273	0.132987	0.748701		14411	b0273	0.0510333	0.294295			14411	b0273	0.035736	0.212837		14411	b0273	0.0869511	0.474721		14411	b0273	-0.00224622	-0.0139522			14411	b0273	-0.0696902	-0.358721		14411	b0273	0.148976	0.868697		14411	b0273	0.0757121	0.473509
14414	b0276	0.0888568	0.691981		14414	b0276	0.100259	0.740362		14414	b0276	0.122322	0.890065			14414	b0276	0.206834	1.50405		14414	b0276	0.100585	0.748137		14414	b0276	0.0244013	0.171302			14414	b0276	0.101531	0.660395		14414	b0276	0.133427	1.02613		14414	b0276	0.101571	0.776571
14415	b0277	0.0619732	0.48903		14415	b0277	0.103652	0.819146		14415	b0277	0.106165	0.828385			14415	b0277	0.10545	0.842093		14415	b0277	0.0557638	0.442416		14415	b0277	0.0420499	0.33622			14415	b0277	0.0504047	0.384178		14415	b0277	0.0562059	0.45035		14415	b0277	0.00896035	0.0703686
14416	b0278	-0.369502	-1.68929		14416	b0278	-0.466502	-2.47732		14416	b0278	-0.331547	-1.64047			14416	b0278	-0.322294	-1.50268		14416	b0278	-0.453136	-2.16011		14416	b0278	-0.57372	-2.79445			14416	b0278	-0.543112	-2.59832		14416	b0278	-0.378053	-1.91117		14416	b0278	-0.294598	-1.35818
14418	b0280	-0.0985984	-0.400979		14418	b0280	-0.131596	-0.530939		14418	b0280	-0.00629199	-0.0255823			14418	b0280	0.0713521	0.322561		14418	b0280	-0.0349167	-0.167235		14418	b0280	-0.0643998	-0.27864			14418	b0280	-0.121697	-0.488381		14418	b0280	-0.106546	-0.459212		14418	b0280	0.0904641	0.420507
14419	b0281	0.323687	1.88818		14419	b0281	0.350631	1.902		14419	b0281	0.286383	1.59923			14419	b0281	0.331543	1.97361		14419	b0281	0.209402	1.1284		14419	b0281	0.178382	0.992068			14419	b0281	0.235043	1.30389		14419	b0281	0.252145	1.45647		14419	b0281	0.285494	1.50823
14421	b0283	-0.0183324	-0.111352		14421	b0283	-0.0893766	-0.51442		14421	b0283	0.0614518	0.337387			14421	b0283	-0.0259235	-0.139058		14421	b0283	-0.0673802	-0.354939		14421	b0283	-0.127308	-0.630861			14421	b0283	-0.0766592	-0.378033		14421	b0283	0.104068	0.575742		14421	b0283	-0.0925634	-0.480282
14422	b0284	0.050241	0.343387		14422	b0284	0.16252	1.09457		14422	b0284	0.0494873	0.353113			14422	b0284	0.111498	0.758959		14422	b0284	0.011812	0.0773264		14422	b0284	0.00817037	0.0560328			14422	b0284	0.0135619	0.0871852		14422	b0284	-0.0298972	-0.189151		14422	b0284	0.0131909	0.0798992
14423	b0285	0.228808	1.44363		14423	b0285	0.286052	1.56305		14423	b0285	0.382696	2.15432			14423	b0285	0.229837	1.17432		14423	b0285	0.220141	1.12794		14423	b0285	0.134938	0.754651			14423	b0285	0.22211	1.23587		14423	b0285	0.260329	1.55597		14423	b0285	0.274668	1.48917
14424	b0286	0.130021	0.526732		14424	b0286	0.17751	0.733726		14424	b0286	0.137307	0.508535			14424	b0286	0.194847	0.819876		14424	b0286	0.169593	0.616231		14424	b0286	0.129985	0.516845			14424	b0286	0.0271902	0.119046		14424	b0286	-0.025553	-0.104601		14424	b0286	0.10401	0.421051
14425	b0287	-0.147879	-0.961212		14425	b0287	-0.038653	-0.246876		14425	b0287	-0.120459	-0.758371			14425	b0287	-0.102444	-0.652903		14425	b0287	-0.10069	-0.63241		14425	b0287	-0.149005	-0.952149			14425	b0287	-0.204334	-1.33398		14425	b0287	-0.154909	-0.963638		14425	b0287	-0.0967704	-0.628675
14426	b0288	0.302339	2.13681		14426	b0288	0.335034	2.44828		14426	b0288	0.35877	2.55751			14426	b0288	0.311001	2.32572		14426	b0288	0.271838	2.03175		14426	b0288	0.204552	1.45466			14426	b0288	0.230156	1.60813		14426	b0288	0.318633	2.30144		14426	b0288	0.299841	2.22219
14427	b0289	0.242486	1.21787		14427	b0289	0.110034	0.593402		14427	b0289	0.182807	0.944095			14427	b0289	0.279187	1.40138		14427	b0289	0.161898	0.911598		14427	b0289	0.0638569	0.354726			14427	b0289	0.206213	0.865273		14427	b0289	0.123955	0.732112		14427	b0289	0.134814	0.746178
14428	b0290	0.226306	1.44416		14428	b0290	0.374917	2.29185		14428	b0290	0.312232	1.78373			14428	b0290	0.368456	2.11627		14428	b0290	0.211474	1.27396		14428	b0290	0.216793	1.33561			14428	b0290	0.147368	0.860925		14428	b0290	0.278721	1.6451		14428	b0290	0.275145	1.63115
14429	b0291	0.295724	2.19322		14429	b0291	0.349932	2.67891		14429	b0291	0.270208	2.11219			14429	b0291	0.294097	2.12586		14429	b0291	0.282549	2.00458		14429	b0291	0.16206	1.20751			14429	b0291	0.228183	1.67315		14429	b0291	0.318645	2.41304		14429	b0291	0.275073	2.14048
14430	b0292	0.190675	1.12531		14430	b0292	0.271498	1.46869		14430	b0292	0.213684	1.26397			14430	b0292	0.287506	1.71741		14430	b0292	0.173109	0.90272		14430	b0292	0.136408	0.672461			14430	b0292	0.0947438	0.507977		14430	b0292	0.302458	1.73321		14430	b0292	0.181639	0.995447
14431	b0293	0.317427	1.91269		14431	b0293	0.386416	2.21247		14431	b0293	0.389057	2.16753			14431	b0293	0.301844	1.85555		14431	b0293	0.370729	2.09108		14431	b0293	0.234319	1.36775			14431	b0293	0.233881	1.46888		14431	b0293	0.296112	1.64185		14431	b0293	0.276909	1.63569
14432	b0294	-0.500508	-1.78052		14432	b0294	-0.467678	-1.24604		14432	b0294	-0.388649	-1.15453			14432	b0294	-0.706752	-1.8333		14432	b0294	-0.317272	-0.837804		14432	b0294	-0.853124	-2.42952			14432	b0294	-0.371672	-1.32293		14432	b0294	-0.326945	-0.868029		14432	b0294	-0.81854	-2.04313
14433	b0295	0.0300631	0.138702		14433	b0295	0.208175	0.848476		14433	b0295	0.195398	0.961081			14433	b0295	0.0185373	0.0875314		14433	b0295	0.113347	0.567392		14433	b0295	0.117737	0.51798			14433	b0295	0.19622	0.844105		14433	b0295	0.118461	0.541072		14433	b0295	0.0409814	0.180933
14434	b0296	0.514872	1.17516		14434	b0296	0.43925	0.952975		14434	b0296	0.546728	1.10421			14434	b0296	0.455587	1.03263		14434	b0296	0.439675	1.03933		14434	b0296	0.411488	0.838082			14434	b0296	-0.0881426	-0.163909		14434	b0296	0.537467	1.13615		14434	b0296	0.474332	1.10444
14435	b0297	0.0483237	0.134246		14435	b0297	0.241187	0.737193		14435	b0297	0.207123	0.599249			14435	b0297	0.267137	0.848811		14435	b0297	0.374633	1.07205		14435	b0297	0.0556184	0.165278			14435	b0297	0.160595	0.499883		14435	b0297	0.0752154	0.212249		14435	b0297	0.236825	0.7204
14438	b0300	-0.209167	-0.657779		14438	b0300	-0.183275	-0.569666		14438	b0300	-0.116595	-0.395053			14438	b0300	-0.369967	-1.18427		14438	b0300	-0.533303	-1.34725		14438	b0300	-0.314725	-1.06636			14438	b0300	-0.286483	-0.818262		14438	b0300	-0.376127	-1.04215		14438	b0300	-0.398902	-1.18103
14439	b0301	-0.12668	-0.514159		14439	b0301	0.0854335	0.366118		14439	b0301	-0.132818	-0.524872			14439	b0301	-0.0941766	-0.429898		14439	b0301	-0.129671	-0.618408		14439	b0301	-0.104519	-0.448471			14439	b0301	-0.149215	-0.680098		14439	b0301	-0.307428	-1.31359		14439	b0301	-0.0461031	-0.194201
14442	b0304	0.00820648	0.0669965		14442	b0304	0.0605969	0.511605		14442	b0304	0.120143	0.985699			14442	b0304	0.12514	1.03618		14442	b0304	0.0199911	0.161777		14442	b0304	-0.111427	-0.901483			14442	b0304	0.0243215	0.197393		14442	b0304	0.0191751	0.157306		14442	b0304	-0.0225349	-0.182444
14443	b0305	-0.209155	-1.11316		14443	b0305	-0.151328	-0.830808		14443	b0305	-0.149006	-0.737937			14443	b0305	-0.123675	-0.65798		14443	b0305	-0.355824	-1.94566		14443	b0305	-0.308223	-1.57367			14443	b0305	-0.178936	-0.901168		14443	b0305	-0.118738	-0.65672		14443	b0305	-0.103681	-0.520437
14444	b0306	0.0534746	0.314176		14444	b0306	0.157842	0.984068		14444	b0306	0.15257	0.856169			14444	b0306	0.12684	0.785534		14444	b0306	0.0495304	0.277298		14444	b0306	-0.0139117	-0.0740449			14444	b0306	0.0152061	0.0894156		14444	b0306	0.112084	0.618265		14444	b0306	-0.0326086	-0.182593
14445	b0307	0.00698799	0.0398976		14445	b0307	-0.0131932	-0.06844		14445	b0307	0.07569	0.422779			14445	b0307	0.0635512	0.354967		14445	b0307	-0.064374	-0.336917		14445	b0307	-0.0957159	-0.54798			14445	b0307	0.01453	0.0811952		14445	b0307	0.0989781	0.570418		14445	b0307	-0.0536458	-0.279456
14446	b0308	-0.216638	-0.986177		14446	b0308	-0.0511509	-0.247342		14446	b0308	-0.0767343	-0.353057			14446	b0308	-0.17064	-0.789156		14446	b0308	-0.144973	-0.72424		14446	b0308	-0.343602	-1.63495			14446	b0308	-0.131782	-0.643731		14446	b0308	-0.17229	-0.807266		14446	b0308	-0.157581	-0.710985
14449	b0311	-0.882972	-5.69637		14449	b0311	-0.834494	-5.68384		14449	b0311	-0.843387	-5.88825			14449	b0311	-0.884239	-5.95893		14449	b0311	-0.70319	-4.77339		14449	b0311	-0.841319	-5.51918			14449	b0311	-0.985039	-6.37344		14449	b0311	-0.79878	-5.4423		14449	b0311	-1.00443	-7.07272
14450	b0312	-0.578431	-3.69214		14450	b0312	-0.465101	-3.20367		14450	b0312	-0.549855	-3.50483			14450	b0312	-0.530125	-3.31651		14450	b0312	-0.368894	-2.36245		14450	b0312	-0.572861	-3.5119			14450	b0312	-0.597396	-3.68292		14450	b0312	-0.556294	-3.71068		14450	b0312	-0.652884	-3.98408
14451	b0313	-0.173351	-0.778016		14451	b0313	-0.0792965	-0.313261		14451	b0313	-0.170064	-0.651598			14451	b0313	0.0398875	0.15228		14451	b0313	-0.012942	-0.0531881		14451	b0313	-0.0415128	-0.186839			14451	b0313	-0.0460911	-0.157298		14451	b0313	0.0290785	0.128481		14451	b0313	-0.201489	-0.78398
14452	b0314	-0.738082	-4.92631		14452	b0314	-0.7854	-5.06064		14452	b0314	-0.718592	-4.73447			14452	b0314	-0.721564	-4.73689		14452	b0314	-0.647367	-4.03839		14452	b0314	-0.70731	-4.68474			14452	b0314	-0.690917	-4.03818		14452	b0314	-0.86238	-5.32526		14452	b0314	-0.850432	-5.29681
14453	b0315	0.00540241	0.0448393		14453	b0315	0.0511528	0.426276		14453	b0315	0.104071	0.857285			14453	b0315	0.0856999	0.710089		14453	b0315	0.100378	0.837357		14453	b0315	-0.0657065	-0.535313			14453	b0315	-0.0718735	-0.580786		14453	b0315	0.0637457	0.526839		14453	b0315	-6.26147e-05	-0.000518188
14454	b0316	0.0158374	0.0968368		14454	b0316	0.106334	0.625419		14454	b0316	0.110375	0.672401			14454	b0316	0.0898269	0.590159		14454	b0316	0.0436216	0.289365		14454	b0316	-0.0329376	-0.202414			14454	b0316	0.107961	0.651202		14454	b0316	0.118756	0.727705		14454	b0316	0.00923373	0.054674
14455	b0317	-0.0976856	-0.385769		14455	b0317	0.00868272	0.0358094		14455	b0317	0.027937	0.138374			14455	b0317	-0.0149907	-0.0575534		14455	b0317	0.0296823	0.119098		14455	b0317	-0.120002	-0.582077			14455	b0317	-0.148662	-0.652166		14455	b0317	-0.00958796	-0.0423264		14455	b0317	-0.20673	-0.70924
14456	b0318	-0.131541	-0.705689		14456	b0318	0.126428	0.628194		14456	b0318	0.108563	0.593135			14456	b0318	-0.0406082	-0.212499		14456	b0318	0.0955291	0.481019		14456	b0318	-0.183236	-0.893655			14456	b0318	-0.118991	-0.611586		14456	b0318	-0.120127	-0.594844		14456	b0318	-0.0394998	-0.229779
14457	b0319	-0.167841	-0.862911		14457	b0319	-0.0483464	-0.266888		14457	b0319	-0.0342221	-0.186411			14457	b0319	-0.0710391	-0.392304		14457	b0319	-0.154351	-0.948534		14457	b0319	-0.254322	-1.5114			14457	b0319	-0.0231422	-0.109989		14457	b0319	-0.218931	-1.26994		14457	b0319	-0.260314	-1.45445
14458	b0320	-0.0445293	-0.274051		14458	b0320	0.0608828	0.357713		14458	b0320	0.0259192	0.161337			14458	b0320	-0.0189814	-0.120324		14458	b0320	0.020257	0.120442		14458	b0320	-0.0375636	-0.264383			14458	b0320	-0.051806	-0.285955		14458	b0320	0.0164391	0.0926507		14458	b0320	0.0136329	0.0874876
14459	b0321	0.176229	1.21848		14459	b0321	0.226496	1.60704		14459	b0321	0.25474	1.7947			14459	b0321	0.243538	1.76662		14459	b0321	0.271848	1.94116		14459	b0321	0.156788	1.08799			14459	b0321	0.222546	1.62371		14459	b0321	0.197535	1.36031		14459	b0321	0.208877	1.47402
14461	b0323	-0.213092	-1.35047		14461	b0323	-0.120299	-0.696799		14461	b0323	-0.189057	-1.15587			14461	b0323	-0.0853315	-0.511171		14461	b0323	-0.290205	-1.74482		14461	b0323	-0.340283	-1.99413			14461	b0323	-0.151329	-0.785041		14461	b0323	-0.179579	-1.19737		14461	b0323	-0.282624	-1.81256
14462	b0324	-0.0939252	-0.661781		14462	b0324	-0.0125294	-0.0861		14462	b0324	0.106845	0.73794			14462	b0324	0.077479	0.567667		14462	b0324	-0.0242147	-0.168345		14462	b0324	-0.101407	-0.759252			14462	b0324	0.0374395	0.241715		14462	b0324	0.0855351	0.61722		14462	b0324	-0.0522003	-0.389115
14463	b0325	0.0163304	0.111144		14463	b0325	0.0344616	0.207326		14463	b0325	0.09007	0.551635			14463	b0325	0.140512	0.88097		14463	b0325	0.0537158	0.364492		14463	b0325	-0.0342582	-0.217287			14463	b0325	-0.0238148	-0.158524		14463	b0325	0.0930099	0.593278		14463	b0325	0.0237851	0.141138
14465	b0327	0.217378	0.829927		14465	b0327	0.312302	1.35774		14465	b0327	0.315507	1.20134			14465	b0327	0.29428	1.16222		14465	b0327	0.304297	1.29674		14465	b0327	0.120773	0.488099			14465	b0327	0.172414	0.804175		14465	b0327	0.311396	1.21356		14465	b0327	0.29204	1.29438
14466	b0328	0.0697825	0.414422		14466	b0328	0.0741036	0.458292		14466	b0328	0.0534174	0.32237			14466	b0328	0.106856	0.675608		14466	b0328	0.0937682	0.586909		14466	b0328	-0.0305192	-0.182464			14466	b0328	0.0176615	0.124044		14466	b0328	0.0557787	0.358984		14466	b0328	0.0430854	0.26215
14467	b0329	-0.241927	-1.32537		14467	b0329	-0.0405175	-0.217342		14467	b0329	-0.103158	-0.547799			14467	b0329	-0.140083	-0.764297		14467	b0329	-0.153155	-0.803136		14467	b0329	-0.229296	-1.31368			14467	b0329	-0.157626	-0.860896		14467	b0329	-0.130369	-0.700037		14467	b0329	-0.168448	-0.905001
14468	b0330	-0.143251	-0.963429		14468	b0330	-0.128086	-0.784635		14468	b0330	-0.103398	-0.646521			14468	b0330	0.0163951	0.0980315		14468	b0330	-0.158302	-0.913302		14468	b0330	-0.167425	-1.00362			14468	b0330	-0.191941	-1.20876		14468	b0330	-0.164572	-1.05864		14468	b0330	-0.121963	-0.810336
14469	b0331	0.14155	0.41508		14469	b0331	0.164062	0.392051		14469	b0331	0.07575	0.206246			14469	b0331	0.0498632	0.136028		14469	b0331	0.14477	0.406648		14469	b0331	0.056328	0.144332			14469	b0331	0.0738696	0.264278		14469	b0331	0.161094	0.481615		14469	b0331	0.113021	0.288947
14471	b0333	0.179991	0.990971		14471	b0333	0.232787	1.35492		14471	b0333	0.25566	1.35173			14471	b0333	0.261201	1.37143		14471	b0333	0.183122	0.959707		14471	b0333	0.122324	0.71012			14471	b0333	0.0621563	0.332145		14471	b0333	0.216546	1.31259		14471	b0333	0.244407	1.37569
14472	b0334	-0.274029	-1.22271		14472	b0334	-0.207662	-1.00142		14472	b0334	-0.248813	-1.13851			14472	b0334	-0.27814	-1.31729		14472	b0334	-0.377774	-1.47545		14472	b0334	-0.266898	-1.28651			14472	b0334	-0.308503	-1.32286		14472	b0334	-0.2859	-1.32184		14472	b0334	-0.298857	-1.52286
14473	b0335	0.100949	0.644119		14473	b0335	0.069208	0.414526		14473	b0335	0.0819875	0.50173			14473	b0335	0.0661773	0.384936		14473	b0335	0.102169	0.645776		14473	b0335	0.0152414	0.0930958			14473	b0335	-0.0182198	-0.115991		14473	b0335	0.0780214	0.466049		14473	b0335	0.047205	0.260342
14474	b0336	-0.0373215	-0.17651		14474	b0336	0.0626748	0.293741		14474	b0336	0.0368094	0.209808			14474	b0336	0.101029	0.575371		14474	b0336	0.087788	0.450968		14474	b0336	0.0358357	0.191683			14474	b0336	0.12684	0.661715		14474	b0336	0.0377474	0.195394		14474	b0336	-0.0145818	-0.0828996
14475	b0337	0.365118	2.50374		14475	b0337	0.458254	3.11301		14475	b0337	0.410356	2.68732			14475	b0337	0.491107	3.08916		14475	b0337	0.396289	2.5115		14475	b0337	0.328383	2.07405			14475	b0337	0.274953	1.5211		14475	b0337	0.494207	3.0762		14475	b0337	0.4371	2.67827
14476	b0338	0.0881054	0.325143		14476	b0338	0.186851	0.723865		14476	b0338	-0.00164881	-0.00485342			14476	b0338	0.160455	0.522547		14476	b0338	0.14757	0.515764		14476	b0338	0.113283	0.425283			14476	b0338	-0.0887778	-0.381415		14476	b0338	0.111849	0.400584		14476	b0338	0.246434	0.826389
14477	b0339	0.629419	2.92793		14477	b0339	0.748269	3.22941		14477	b0339	0.562197	2.29361			14477	b0339	0.728002	3.29784		14477	b0339	0.507345	1.55386		14477	b0339	0.428912	2.09082			14477	b0339	0.370444	1.55305		14477	b0339	0.68601	3.22665		14477	b0339	0.635819	2.53328
14479	b0341	0.412348	2.38659		14479	b0341	0.342847	2.03382		14479	b0341	0.457141	2.55688			14479	b0341	0.347798	1.86831		14479	b0341	0.427648	2.50847		14479	b0341	0.269583	1.74524			14479	b0341	0.464927	2.54608		14479	b0341	0.403299	2.41374		14479	b0341	0.333271	1.89636
14480	b0342	-0.0683329	-0.439633		14480	b0342	-0.0880567	-0.581469		14480	b0342	0.0256771	0.16576			14480	b0342	0.0497066	0.32369		14480	b0342	-0.0283188	-0.176318		14480	b0342	-0.0778868	-0.534101			14480	b0342	-0.105683	-0.670646		14480	b0342	-0.0157982	-0.107586		14480	b0342	-0.0544089	-0.348217
14481	b0343	0.0366127	0.274382		14481	b0343	0.0587752	0.437333		14481	b0343	0.0995893	0.728205			14481	b0343	0.10689	0.776661		14481	b0343	0.0871987	0.65866		14481	b0343	-0.0601671	-0.452886			14481	b0343	-0.0275833	-0.199764		14481	b0343	0.0649005	0.488043		14481	b0343	0.0359915	0.268994
14482	b0344	-0.0813664	-0.417062		14482	b0344	-0.0131932	-0.0695566		14482	b0344	0.0225527	0.114471			14482	b0344	-0.0710872	-0.377956		14482	b0344	-0.0430111	-0.189869		14482	b0344	-0.097795	-0.526046			14482	b0344	-0.0905958	-0.495717		14482	b0344	-0.0868406	-0.469398		14482	b0344	-0.102703	-0.520523
14483	b0345	0.0977816	0.59576		14483	b0345	0.119657	0.758805		14483	b0345	0.113202	0.811638			14483	b0345	0.234368	1.40804		14483	b0345	0.106316	0.700497		14483	b0345	0.0308081	0.198152			14483	b0345	0.158356	0.899572		14483	b0345	0.125004	0.814822		14483	b0345	0.0456467	0.274782
14484	b0346	0.267496	0.823457		14484	b0346	0.0564378	0.190528		14484	b0346	0.29295	0.997048			14484	b0346	0.0211582	0.063277		14484	b0346	0.150881	0.659002		14484	b0346	0.0467578	0.136326			14484	b0346	0.23024	0.677313		14484	b0346	0.243013	0.903048		14484	b0346	0.0812299	0.228249
14485	b0347	-0.0849346	-0.5571		14485	b0347	0.041148	0.254684		14485	b0347	-0.0294457	-0.173824			14485	b0347	0.0178048	0.110918		14485	b0347	0.043844	0.294046		14485	b0347	-0.112756	-0.687294			14485	b0347	-0.11981	-0.718725		14485	b0347	-0.0542088	-0.32932		14485	b0347	0.0393373	0.256609
14486	b0348	0.0986832	0.563514		14486	b0348	0.224446	1.15497		14486	b0348	0.189727	0.947835			14486	b0348	0.0383463	0.225355		14486	b0348	0.233186	1.21748		14486	b0348	0.103462	0.578096			14486	b0348	-0.0381102	-0.152695		14486	b0348	0.0510012	0.304757		14486	b0348	-0.0212717	-0.118102
14487	b0349	0.267983	1.50508		14487	b0349	0.330151	1.78118		14487	b0349	0.341779	1.81416			14487	b0349	0.331869	1.93694		14487	b0349	0.193607	1.03481		14487	b0349	0.25904	1.45089			14487	b0349	0.205111	1.15029		14487	b0349	0.315285	1.62038		14487	b0349	0.229142	1.24058
14488	b0350	0.206715	1.08367		14488	b0350	0.211255	1.06602		14488	b0350	0.233262	1.25689			14488	b0350	0.191444	1.06231		14488	b0350	0.128969	0.657228		14488	b0350	0.0252569	0.139694			14488	b0350	0.176011	0.893833		14488	b0350	0.212386	1.14525		14488	b0350	0.215464	1.15605
14489	b0351	0.11547	0.732392		14489	b0351	0.116581	0.737611		14489	b0351	0.199047	1.45389			14489	b0351	0.110587	0.74148		14489	b0351	0.0958808	0.569115		14489	b0351	0.13341	0.823476			14489	b0351	0.0236194	0.144925		14489	b0351	0.108653	0.589893		14489	b0351	0.151166	0.895015
14490	b0352	0.233725	0.745212		14490	b0352	0.311842	1.18041		14490	b0352	0.328635	1.20594			14490	b0352	0.34329	1.19535		14490	b0352	-0.0535184	-0.169496		14490	b0352	0.258933	0.93336			14490	b0352	0.285751	0.974661		14490	b0352	0.240324	0.844406		14490	b0352	0.384399	1.2209
14491	b0353	-0.22527	-1.25702		14491	b0353	-0.274902	-1.50081		14491	b0353	-0.240938	-1.24248			14491	b0353	-0.344121	-2.04327		14491	b0353	-0.194568	-0.887025		14491	b0353	-0.42599	-2.1764			14491	b0353	-0.22726	-1.02166		14491	b0353	-0.231695	-1.12549		14491	b0353	-0.36333	-1.95392
14492	b0354	-0.0247423	-0.127839		14492	b0354	0.0328165	0.183797		14492	b0354	0.101324	0.601825			14492	b0354	0.0762536	0.43566		14492	b0354	0.125808	0.633064		14492	b0354	0.0386372	0.207599			14492	b0354	0.00567224	0.0297995		14492	b0354	0.148087	0.927569		14492	b0354	0.0726844	0.377781
14493	b0355	0.0318604	0.162215		14493	b0355	0.17324	0.869243		14493	b0355	0.241965	1.5013			14493	b0355	0.178197	1.10353		14493	b0355	0.127501	0.645969		14493	b0355	0.051793	0.274517			14493	b0355	0.117869	0.634066		14493	b0355	0.163088	0.901246		14493	b0355	0.103671	0.572697
14494	b0356	0.0945812	0.556309		14494	b0356	0.0328803	0.173898		14494	b0356	0.19416	1.24089			14494	b0356	0.200702	1.17861		14494	b0356	0.025256	0.146519		14494	b0356	0.0330863	0.192604			14494	b0356	0.160337	0.997773		14494	b0356	0.0927011	0.601651		14494	b0356	0.0967238	0.61353
14496	b0358	-0.2466	-1.70335		14496	b0358	-0.132969	-0.934398		14496	b0358	-0.11142	-0.779716			14496	b0358	-0.154823	-1.10158		14496	b0358	-0.147392	-1.05618		14496	b0358	-0.183893	-1.32094			14496	b0358	-0.139411	-0.949329		14496	b0358	-0.144576	-1.02545		14496	b0358	-0.123342	-0.855026
14501	b0363	0.0912012	0.710197		14501	b0363	0.161187	1.25027		14501	b0363	0.131235	0.990092			14501	b0363	0.113353	0.878505		14501	b0363	0.113453	0.880904		14501	b0363	0.0729875	0.567822			14501	b0363	0.0522691	0.394193		14501	b0363	0.168815	1.32897		14501	b0363	0.135814	1.0253
14502	b0364	-1.16116	-4.37594		14502	b0364	-1.12975	-3.86666		14502	b0364	-1.32762	-5.02477			14502	b0364	-1.17311	-4.22018		14502	b0364	-1.30902	-4.38175		14502	b0364	-1.40015	-5.23325			14502	b0364	-0.960144	-3.36837		14502	b0364	-1.23966	-4.1601		14502	b0364	-1.49952	-3.99327
14503	b0365	-0.161387	-0.634534		14503	b0365	-0.0239383	-0.0914583		14503	b0365	0.0472478	0.184822			14503	b0365	-0.0638037	-0.237009		14503	b0365	-0.0332036	-0.128245		14503	b0365	-0.166803	-0.64908			14503	b0365	-0.0486051	-0.228338		14503	b0365	0.0515652	0.208976		14503	b0365	0.0633648	0.287368
14504	b0366	0.067653	0.388056		14504	b0366	0.0145959	0.0767277		14504	b0366	0.0638003	0.357421			14504	b0366	0.140647	0.721235		14504	b0366	0.0447274	0.259299		14504	b0366	0.0275906	0.141927			14504	b0366	0.0347233	0.160582		14504	b0366	0.0762348	0.426834		14504	b0366	0.104018	0.567683
14505	b0367	-0.323829	-1.41633		14505	b0367	-0.123575	-0.642295		14505	b0367	-0.357907	-1.82037			14505	b0367	-0.133794	-0.687348		14505	b0367	-0.0730187	-0.370089		14505	b0367	-0.268794	-1.3467			14505	b0367	-0.159467	-0.658379		14505	b0367	-0.075889	-0.365339		14505	b0367	-0.124455	-0.649871
14506	b0368	0.0381588	0.134937		14506	b0368	0.0876935	0.365152		14506	b0368	-0.0157353	-0.0469621			14506	b0368	-0.0216318	-0.0709013		14506	b0368	-0.0475889	-0.172753		14506	b0368	0.0217911	0.0716062			14506	b0368	0.0105391	0.0368257		14506	b0368	-0.0622453	-0.215665		14506	b0368	0.115663	0.382083
14513	b0375	-0.11066	-0.327148		14513	b0375	-0.280372	-0.931082		14513	b0375	-0.163371	-0.546576			14513	b0375	-0.0396187	-0.119179		14513	b0375	-0.117058	-0.314317		14513	b0375	-0.123666	-0.392877			14513	b0375	-0.234617	-0.840916		14513	b0375	0.0239234	0.085462		14513	b0375	-0.0305344	-0.0896837
14514	b0376	-0.0653313	-0.481762		14514	b0376	-0.0265542	-0.187001		14514	b0376	-0.0986891	-0.684169			14514	b0376	0.0166003	0.120665		14514	b0376	-0.022297	-0.16216		14514	b0376	-0.0957686	-0.728832			14514	b0376	-0.0270715	-0.200593		14514	b0376	-0.0405113	-0.293357		14514	b0376	-0.0214301	-0.1468
14515	b0377	0.213863	1.57209		14515	b0377	0.154066	1.13428		14515	b0377	0.219516	1.64175			14515	b0377	0.154255	1.06948		14515	b0377	0.17458	1.22864		14515	b0377	0.179107	1.29507			14515	b0377	0.158636	1.04529		14515	b0377	0.174267	1.27287		14515	b0377	0.217787	1.49364
14516	b0378	-0.0295528	-0.191927		14516	b0378	0.0579622	0.376846		14516	b0378	0.0509207	0.303271			14516	b0378	0.122313	0.729432		14516	b0378	0.0466356	0.294904		14516	b0378	-0.0167245	-0.115303			14516	b0378	-0.0462922	-0.279596		14516	b0378	0.066561	0.415656		14516	b0378	0.133973	0.842594
14517	b0379	-0.391701	-2.30173		14517	b0379	-0.339744	-1.96866		14517	b0379	-0.36574	-2.16964			14517	b0379	-0.468171	-2.37683		14517	b0379	-0.320239	-1.48968		14517	b0379	-0.32317	-1.70868			14517	b0379	-0.185876	-0.996255		14517	b0379	-0.362644	-2.14798		14517	b0379	-0.324019	-1.9253
14518	b0380	-0.331987	-1.472		14518	b0380	-0.148392	-0.772264		14518	b0380	-0.226592	-1.01636			14518	b0380	-0.222979	-0.98967		14518	b0380	-0.360694	-1.70352		14518	b0380	-0.262332	-1.34417			14518	b0380	-0.419135	-1.95137		14518	b0380	-0.388791	-1.72465		14518	b0380	-0.276754	-1.55241
14519	b0381	0.122295	0.654804		14519	b0381	0.0314579	0.176415		14519	b0381	0.0659234	0.291156			14519	b0381	0.0493293	0.250414		14519	b0381	0.181975	0.914303		14519	b0381	0.0423738	0.206196			14519	b0381	-0.0692443	-0.282325		14519	b0381	0.0962876	0.485758		14519	b0381	-0.0297455	-0.1668
14520	b0382	0.03308	0.229784		14520	b0382	0.190725	1.14376		14520	b0382	0.157265	0.939115			14520	b0382	-5.32902e-05	-0.000324323		14520	b0382	0.0662234	0.388855		14520	b0382	0.119447	0.751439			14520	b0382	0.106135	0.650492		14520	b0382	0.113637	0.690746		14520	b0382	0.192722	1.2935
14521	b0383	0.0750779	0.605118		14521	b0383	0.112278	0.923132		14521	b0383	0.0773126	0.570244			14521	b0383	0.151533	1.17198		14521	b0383	0.0634542	0.494448		14521	b0383	0.100992	0.817748			14521	b0383	0.0418603	0.335277		14521	b0383	0.104167	0.811608		14521	b0383	0.0796115	0.625593
14522	b0384	0.385952	1.14902		14522	b0384	0.416349	1.10147		14522	b0384	0.346551	0.96614			14522	b0384	0.272069	0.820848		14522	b0384	0.252338	0.636035		14522	b0384	0.433067	1.17534			14522	b0384	0.411484	1.15504		14522	b0384	0.514331	1.51017		14522	b0384	0.465963	1.19019
14523	b0385	0.10122	0.577155		14523	b0385	0.0342151	0.166275		14523	b0385	0.059202	0.311624			14523	b0385	0.0290249	0.141847		14523	b0385	0.101421	0.465347		14523	b0385	0.159185	0.818367			14523	b0385	0.11742	0.507294		14523	b0385	0.0843557	0.398902		14523	b0385	0.186618	0.874551
14525	b0387	0.257133	1.21558		14525	b0387	0.361999	1.96631		14525	b0387	0.231831	1.2229			14525	b0387	0.377189	2.12486		14525	b0387	0.275398	1.3561		14525	b0387	0.226753	1.09322			14525	b0387	0.0895925	0.282582		14525	b0387	0.337436	1.92641		14525	b0387	0.223309	1.07487
14526	b0388	-0.376822	-1.19766		14526	b0388	-0.366668	-1.2594		14526	b0388	-0.205235	-0.657527			14526	b0388	-0.342928	-1.10777		14526	b0388	-0.390422	-1.35292		14526	b0388	-0.31046	-1.22589			14526	b0388	-0.596792	-2.1235		14526	b0388	-0.309104	-1.09516		14526	b0388	-0.19137	-0.642401
14528	b0390	0.109608	0.578255		14528	b0390	-0.014704	-0.0806226		14528	b0390	-0.132704	-0.779637			14528	b0390	0.0759693	0.397243		14528	b0390	0.125834	0.624969		14528	b0390	-0.0608126	-0.31745			14528	b0390	0.0597748	0.336814		14528	b0390	0.0070883	0.037668		14528	b0390	-0.106674	-0.53607
14529	b0391	-0.00281769	-0.0158767		14529	b0391	-0.0131932	-0.077494		14529	b0391	-0.0652255	-0.360731			14529	b0391	-0.0185324	-0.0848239		14529	b0391	-0.0181202	-0.0988691		14529	b0391	-0.0349424	-0.169926			14529	b0391	-0.0292563	-0.147723		14529	b0391	-0.0432665	-0.279606		14529	b0391	0.078194	0.43661
14530	b0392	0.12044	0.78224		14530	b0392	0.106358	0.706753		14530	b0392	0.0964991	0.633314			14530	b0392	0.147394	1.00306		14530	b0392	0.0908264	0.568181		14530	b0392	0.108254	0.701794			14530	b0392	0.0683	0.44421		14530	b0392	0.110955	0.735551		14530	b0392	0.101458	0.665678
14531	b0393	0.0933876	0.560922		14531	b0393	0.300628	1.77627		14531	b0393	0.358992	2.05782			14531	b0393	0.091188	0.52807		14531	b0393	0.359205	2.13682		14531	b0393	0.235108	1.37839			14531	b0393	0.0752269	0.451792		14531	b0393	0.198031	1.17707		14531	b0393	0.229064	1.32797
14532	b0394	0.175114	0.849941		14532	b0394	0.117787	0.551635		14532	b0394	0.139226	0.73256			14532	b0394	0.21099	1.21823		14532	b0394	0.186054	0.933374		14532	b0394	0.16784	0.977123			14532	b0394	-0.0622728	-0.344964		14532	b0394	0.158864	0.8377		14532	b0394	0.21842	1.19506
14534	b0396	-0.0493744	-0.369691		14534	b0396	-0.114257	-0.851712		14534	b0396	-0.0602428	-0.460508			14534	b0396	-0.0910065	-0.669874		14534	b0396	-0.0787122	-0.589497		14534	b0396	-0.0732064	-0.532437			14534	b0396	-0.152709	-1.10559		14534	b0396	-0.111326	-0.813293		14534	b0396	-0.089887	-0.664271
14535	b0397	0.0549683	0.366424		14535	b0397	0.127144	0.838906		14535	b0397	0.0671609	0.412028			14535	b0397	0.038194	0.257985		14535	b0397	0.0894855	0.607519		14535	b0397	0.113989	0.746952			14535	b0397	-0.0252486	-0.158289		14535	b0397	0.0822761	0.540221		14535	b0397	0.0980929	0.627086
14536	b0398	-0.0809332	-0.41527		14536	b0398	-0.0816328	-0.382403		14536	b0398	-0.0898855	-0.4725			14536	b0398	-0.0154044	-0.0675465		14536	b0398	0.149833	0.767705		14536	b0398	-0.0184508	-0.0950466			14536	b0398	0.0889873	0.413161		14536	b0398	-0.00356159	-0.0172299		14536	b0398	-0.0651511	-0.311845
14537	b0399	0.00478168	0.0268487		14537	b0399	-0.0498203	-0.266587		14537	b0399	-0.0148338	-0.0692996			14537	b0399	0.0275484	0.148566		14537	b0399	0.0275757	0.14949		14537	b0399	-0.0627915	-0.320593			14537	b0399	0.0102111	0.0508188		14537	b0399	0.0934113	0.508708		14537	b0399	0.0294247	0.163714
14538	b0400	-0.738512	-3.66478		14538	b0400	-0.658432	-3.1355		14538	b0400	-1.07209	-4.68113			14538	b0400	-0.94659	-4.15558		14538	b0400	-0.546064	-2.45061		14538	b0400	-0.95927	-3.92861			14538	b0400	-0.862142	-3.62989		14538	b0400	-1.04944	-4.56783		14538	b0400	-1.02954	-4.49232
14539	b0401	-2.28169	-14.2343		14539	b0401	-1.64444	-10.6709		14539	b0401	-1.6188	-9.81686			14539	b0401	-1.84763	-12.3201		14539	b0401	-2.08119	-11.9195		14539	b0401	-1.91836	-11.6763			14539	b0401	-2.34735	-13.8001		14539	b0401	-1.86727	-11.0589		14539	b0401	-1.86559	-11.9723
14540	b0402	0.00916564	0.0615266		14540	b0402	-0.0128152	-0.0925411		14540	b0402	-0.0273556	-0.187008			14540	b0402	-0.0642112	-0.467529		14540	b0402	0.0180062	0.117582		14540	b0402	0.0533439	0.375306			14540	b0402	0.0688918	0.47208		14540	b0402	0.0322569	0.222084		14540	b0402	0.0453577	0.3131
14541	b0403	0.0501534	0.337418		14541	b0403	0.0426859	0.28189		14541	b0403	-0.0649558	-0.391383			14541	b0403	0.0559795	0.345521		14541	b0403	-0.0489974	-0.32519		14541	b0403	0.0190665	0.120727			14541	b0403	0.0643413	0.412693		14541	b0403	0.0275923	0.171513		14541	b0403	0.0365099	0.243896
14542	b0404	0.6273	2.08449		14542	b0404	0.46668	1.8432		14542	b0404	0.393244	1.44688			14542	b0404	0.293485	0.864984		14542	b0404	0.475624	1.80631		14542	b0404	0.60804	2.80758			14542	b0404	0.722406	2.16359		14542	b0404	0.409491	1.61875		14542	b0404	0.625697	2.24779
14543	b0405	-0.42365	-1.28827		14543	b0405	-0.615084	-2.16694		14543	b0405	-0.51745	-1.7168			14543	b0405	-0.341355	-1.26729		14543	b0405	-0.23339	-0.802083		14543	b0405	-0.258143	-0.821286			14543	b0405	-0.319753	-1.04153		14543	b0405	-0.471564	-1.25105		14543	b0405	-0.365713	-1.59174
14544	b0406	-1.09418	-2.66716		14544	b0406	-1.4077	-2.78679		14544	b0406	-1.37935	-2.75464			14544	b0406	-0.839868	-1.82421		14544	b0406	-1.01762	-2.32057		14544	b0406	-1.19444	-3.19424			14544	b0406	-1.05535	-2.45507		14544	b0406	-1.04938	-2.23205		14544	b0406	-1.21105	-2.15538
14548	b0410	-0.0510782	-0.211115		14548	b0410	-0.141813	-0.491289		14548	b0410	-0.119858	-0.49994			14548	b0410	-0.08711	-0.330308		14548	b0410	-0.220444	-0.793659		14548	b0410	-0.0422444	-0.147627			14548	b0410	-0.0667165	-0.234356		14548	b0410	-0.247807	-0.924261		14548	b0410	-0.159489	-0.531062
14549	b0411	0.0460805	0.282063		14549	b0411	-0.00456897	-0.0285831		14549	b0411	-0.0216278	-0.135637			14549	b0411	-0.0532114	-0.34045		14549	b0411	-0.0396741	-0.25514		14549	b0411	0.0559672	0.319026			14549	b0411	-0.0897541	-0.586609		14549	b0411	0.00614597	0.040713		14549	b0411	-0.0246888	-0.155572
14550	b0412	0.103212	0.395037		14550	b0412	0.224092	0.680034		14550	b0412	0.1204	0.414963			14550	b0412	0.079865	0.259779		14550	b0412	0.111329	0.349524		14550	b0412	0.220501	0.784882			14550	b0412	0.218137	0.584195		14550	b0412	0.218311	0.768554		14550	b0412	0.283669	1.01452
14556	b0418	-0.149735	-0.440998		14556	b0418	-0.249663	-0.631106		14556	b0418	-0.132502	-0.419031			14556	b0418	-0.138911	-0.470835		14556	b0418	-0.0139475	-0.0396982		14556	b0418	-0.0783086	-0.242869			14556	b0418	-0.211097	-0.549965		14556	b0418	-0.0234967	-0.0803062		14556	b0418	-0.20803	-0.629627
14557	b0419	0.0090269	0.0487253		14557	b0419	0.00593618	0.0327368		14557	b0419	0.0200222	0.107904			14557	b0419	0.143503	0.720304		14557	b0419	0.0643259	0.343791		14557	b0419	0.0531308	0.290694			14557	b0419	0.040078	0.19857		14557	b0419	-0.0694937	-0.371066		14557	b0419	0.048128	0.258267
14561	b0423	0.189603	0.813444		14561	b0423	0.0650556	0.298227		14561	b0423	0.105965	0.445655			14561	b0423	0.137648	0.574625		14561	b0423	0.0243584	0.100121		14561	b0423	0.226607	1.01467			14561	b0423	0.0795291	0.371931		14561	b0423	0.138794	0.574299		14561	b0423	0.111951	0.514621
14562	b0424	0.123171	0.686645		14562	b0424	0.105115	0.667708		14562	b0424	0.126846	0.651856			14562	b0424	0.10017	0.549059		14562	b0424	0.0697469	0.422134		14562	b0424	0.160385	0.958121			14562	b0424	0.131988	0.719454		14562	b0424	0.173502	1.12462		14562	b0424	0.141019	0.830118
14563	b0425	-0.0142511	-0.0835897		14563	b0425	-0.12753	-0.71655		14563	b0425	-0.146214	-0.833051			14563	b0425	-0.082316	-0.485155		14563	b0425	-0.0141543	-0.0827258		14563	b0425	0.00585655	0.0326198			14563	b0425	-0.078593	-0.466944		14563	b0425	-0.0977064	-0.569067		14563	b0425	-0.0169258	-0.0990709
14564	b0426	0.0758008	0.321839		14564	b0426	0.170073	0.680927		14564	b0426	0.205352	1.01364			14564	b0426	0.125277	0.563865		14564	b0426	0.137868	0.65781		14564	b0426	0.377643	1.77655			14564	b0426	0.466765	2.10323		14564	b0426	0.374269	1.64671		14564	b0426	0.187991	0.859505
14565	b0427	-0.512323	-3.3651		14565	b0427	-0.239122	-1.67369		14565	b0427	-0.363131	-2.39338			14565	b0427	-0.461296	-3.00497		14565	b0427	-0.359081	-2.07099		14565	b0427	-0.307835	-2.08656			14565	b0427	-0.500431	-2.78209		14565	b0427	-0.460925	-2.72435		14565	b0427	-0.260912	-1.68412
14566	b0428	-0.433068	-2.34837		14566	b0428	-0.359451	-1.63651		14566	b0428	-0.531308	-2.63485			14566	b0428	-0.719111	-3.50985		14566	b0428	-0.467488	-2.54779		14566	b0428	-0.585499	-3.26218			14566	b0428	-0.748795	-3.43972		14566	b0428	-0.728117	-3.8381		14566	b0428	-0.684065	-3.62228
14567	b0429	-0.35231	-1.11151		14567	b0429	-0.298736	-0.998387		14567	b0429	-0.36723	-0.904682			14567	b0429	-0.314276	-0.891056		14567	b0429	-0.227599	-0.628631		14567	b0429	-0.557906	-1.45808			14567	b0429	-0.863314	-2.30205		14567	b0429	-0.638996	-2.01063		14567	b0429	-0.396238	-1.2519
14568	b0430	-1.02805	-3.62712		14568	b0430	-1.18927	-4.08613		14568	b0430	-1.1112	-4.53194			14568	b0430	-1.36626	-5.10045		14568	b0430	-0.770938	-2.96258		14568	b0430	-0.924672	-3.51091			14568	b0430	-1.11539	-3.30943		14568	b0430	-0.986773	-3.68296		14568	b0430	-0.953801	-3.85474
14569	b0431	-0.489948	-3.35573		14569	b0431	-0.409979	-2.67103		14569	b0431	-0.613928	-3.82131			14569	b0431	-0.863617	-5.64753		14569	b0431	-0.668156	-4.10791		14569	b0431	-0.760375	-4.92678			14569	b0431	-0.715158	-4.36543		14569	b0431	-0.902714	-6.11166		14569	b0431	-0.775524	-5.06735
14570	b0432	-0.281977	-1.80894		14570	b0432	-0.223991	-1.41055		14570	b0432	-0.36501	-2.23283			14570	b0432	-0.616994	-3.75436		14570	b0432	-0.410496	-2.49836		14570	b0432	-0.525922	-3.3455			14570	b0432	-0.554481	-3.5017		14570	b0432	-0.550662	-3.60485		14570	b0432	-0.517327	-3.18557
14571	b0433	-0.0521	-0.428603		14571	b0433	-0.0521407	-0.429189		14571	b0433	-0.0911169	-0.736059			14571	b0433	-0.0268356	-0.220842		14571	b0433	-0.0676074	-0.551582		14571	b0433	0.0104592	0.0854122			14571	b0433	-0.183433	-1.49715		14571	b0433	-0.0717054	-0.580052		14571	b0433	0.0487215	0.395179
14572	b0434	-0.0883616	-0.547728		14572	b0434	-0.179105	-1.03174		14572	b0434	-0.184991	-1.15609			14572	b0434	-0.083746	-0.480324		14572	b0434	-0.0493782	-0.28332		14572	b0434	-0.137358	-0.720695			14572	b0434	-0.369857	-2.00463		14572	b0434	-0.151639	-0.904834		14572	b0434	0.0107785	0.0616566
14573	b0435	0.120483	0.628817		14573	b0435	0.157189	0.839571		14573	b0435	-0.0729738	-0.351616			14573	b0435	0.0275547	0.150886		14573	b0435	-0.129287	-0.600984		14573	b0435	0.13596	0.699183			14573	b0435	0.0454717	0.244178		14573	b0435	-0.0259953	-0.132797		14573	b0435	0.163016	0.909591
14574	b0436	0.0837278	0.393525		14574	b0436	-0.0774412	-0.436026		14574	b0436	-0.200903	-1.09565			14574	b0436	-0.0979015	-0.433888		14574	b0436	0.0400393	0.180967		14574	b0436	0.0591237	0.255678			14574	b0436	-0.0230393	-0.114619		14574	b0436	-0.286052	-1.60284		14574	b0436	-0.15238	-0.749974
14578	b0440	-0.0250858	-0.0806685		14578	b0440	-0.0729682	-0.22419		14578	b0440	0.018124	0.066809			14578	b0440	-0.256811	-0.872791		14578	b0440	-0.129675	-0.385671		14578	b0440	0.0980249	0.339171			14578	b0440	0.142459	0.512		14578	b0440	-0.0801144	-0.266107		14578	b0440	0.187123	0.632705
14579	b0441	-0.139384	-1.10771		14579	b0441	-0.161148	-1.23455		14579	b0441	-0.323294	-2.48652			14579	b0441	-0.139635	-1.08663		14579	b0441	-0.308114	-2.2583		14579	b0441	-0.0960963	-0.752871			14579	b0441	-0.205755	-1.65395		14579	b0441	-0.164063	-1.25279		14579	b0441	-0.141862	-1.1173
14580	b0442	0.200178	0.655792		14580	b0442	0.249078	0.839818		14580	b0442	0.180714	0.592401			14580	b0442	0.100339	0.3913		14580	b0442	0.0670343	0.228		14580	b0442	0.389714	1.39803			14580	b0442	-0.0279383	-0.0942395		14580	b0442	0.172831	0.67206		14580	b0442	0.378269	1.34944
14581	b0443	0.14157	0.641694		14581	b0443	-0.0690288	-0.307085		14581	b0443	-0.111439	-0.531566			14581	b0443	0.000834448	0.00410507		14581	b0443	0.0224603	0.111496		14581	b0443	0.121665	0.568964			14581	b0443	0.0152651	0.0712777		14581	b0443	-0.0491183	-0.234689		14581	b0443	0.030782	0.146027
14582	b0444	0.0113189	0.0628013		14582	b0444	-0.105109	-0.563263		14582	b0444	-0.204311	-1.11118			14582	b0444	-0.0845539	-0.485595		14582	b0444	0.0256893	0.148167		14582	b0444	0.0110364	0.0614753			14582	b0444	-0.0905081	-0.443025		14582	b0444	-0.136955	-0.750847		14582	b0444	-0.0662888	-0.349779
14583	b0445	-0.122389	-0.793853		14583	b0445	-0.102378	-0.717659		14583	b0445	-0.211341	-1.4367			14583	b0445	-0.159129	-1.09051		14583	b0445	-0.125927	-0.860989		14583	b0445	0.00771335	0.0511174			14583	b0445	-0.155442	-1.03902		14583	b0445	-0.079666	-0.554395		14583	b0445	-0.0736137	-0.488607
14584	b0446	-0.203213	-0.973481		14584	b0446	-0.124394	-0.634187		14584	b0446	-0.0671028	-0.346498			14584	b0446	-0.194584	-0.942265		14584	b0446	-0.00175444	-0.00899217		14584	b0446	0.00334618	0.0161127			14584	b0446	-0.0739389	-0.372955		14584	b0446	-0.122319	-0.577803		14584	b0446	-0.0477627	-0.235381
14585	b0447	-0.0938824	-0.506808		14585	b0447	-0.079014	-0.383027		14585	b0447	-0.0433847	-0.188131			14585	b0447	0.058115	0.286715		14585	b0447	-0.0816097	-0.391901		14585	b0447	-0.0210384	-0.108152			14585	b0447	0.0255971	0.116256		14585	b0447	-0.0572685	-0.278245		14585	b0447	-0.0487882	-0.235984
14586	b0448	-0.0126961	-0.0754273		14586	b0448	-0.0974481	-0.568814		14586	b0448	-0.15714	-0.897648			14586	b0448	-0.154796	-0.907464		14586	b0448	-0.059564	-0.35728		14586	b0448	0.0489379	0.276892			14586	b0448	-0.0933549	-0.532158		14586	b0448	-0.199254	-1.12755		14586	b0448	-0.0684861	-0.400725
14587	b0449	-0.124879	-0.741837		14587	b0449	-0.182674	-1.03645		14587	b0449	-0.324367	-1.88822			14587	b0449	-0.263398	-1.42723		14587	b0449	-0.171049	-0.928931		14587	b0449	-0.0776787	-0.443121			14587	b0449	-0.288874	-1.55011		14587	b0449	-0.153204	-0.925407		14587	b0449	-0.0621288	-0.363366
14588	b0450	-0.249229	-0.432444		14588	b0450	-0.642892	-1.22008		14588	b0450	-0.734548	-1.94817			14588	b0450	-0.72256	-1.49072		14588	b0450	-0.236011	-0.41438		14588	b0450	-0.184649	-0.428346			14588	b0450	-0.589825	-0.813055		14588	b0450	-0.242543	-0.406007		14588	b0450	-0.56696	-1.15075
14589	b0451	-0.029493	-0.189544		14589	b0451	-0.0723817	-0.414385		14589	b0451	-0.118684	-0.706887			14589	b0451	-0.153831	-1.01102		14589	b0451	-0.105492	-0.673604		14589	b0451	-0.174321	-1.20954			14589	b0451	-0.146055	-0.826147		14589	b0451	-0.0431105	-0.283767		14589	b0451	-0.133547	-0.936074
14590	b0452	0.276243	1.4718		14590	b0452	0.165981	0.899604		14590	b0452	0.156057	0.835379			14590	b0452	0.175163	0.903231		14590	b0452	0.150642	0.750733		14590	b0452	0.306421	1.66084			14590	b0452	0.205087	1.06185		14590	b0452	0.159068	0.843498		14590	b0452	0.252018	1.40089
14591	b0453	0.128242	0.693128		14591	b0453	-0.117782	-0.675644		14591	b0453	0.00748214	0.0399503			14591	b0453	-0.00462677	-0.0279051		14591	b0453	0.138135	0.815216		14591	b0453	0.1408	0.878059			14591	b0453	-0.0210337	-0.108494		14591	b0453	-0.0293872	-0.191939		14591	b0453	-0.101784	-0.554804
14592	b0454	-0.191543	-0.879652		14592	b0454	-0.0541337	-0.287344		14592	b0454	-0.252145	-1.0796			14592	b0454	-0.172617	-0.857816		14592	b0454	-0.0704306	-0.307197		14592	b0454	-0.202294	-0.867643			14592	b0454	-0.27362	-1.30569		14592	b0454	-0.215578	-1.07353		14592	b0454	-0.183298	-0.775767
14593	b0456	0.405056	0.96199		14593	b0456	0.62701	1.62996		14593	b0456	0.448909	1.0162			14593	b0456	0.311898	0.829458		14593	b0456	0.322564	0.800192		14593	b0456	0.523786	1.21303			14593	b0456	0.519254	1.14998		14593	b0456	0.224997	0.449787		14593	b0456	0.376182	0.950811
14594	b0457	-0.0695667	-0.556046		14594	b0457	-0.0890882	-0.685911		14594	b0457	-0.128498	-1.01368			14594	b0457	-0.103894	-0.821246		14594	b0457	-0.0875415	-0.687466		14594	b0457	-0.0286011	-0.222068			14594	b0457	-0.123848	-0.969589		14594	b0457	-0.143029	-1.12263		14594	b0457	-0.0366463	-0.281344
14595	b0458	0.0280719	0.134103		14595	b0458	-0.108699	-0.483107		14595	b0458	-0.0704835	-0.32529			14595	b0458	0.0392192	0.184341		14595	b0458	-0.0819689	-0.392977		14595	b0458	0.203699	0.901827			14595	b0458	0.0617577	0.298043		14595	b0458	-0.024924	-0.118457		14595	b0458	0.13676	0.680764
14596	b0459	0.0107051	0.0745745		14596	b0459	0.0132881	0.0926315		14596	b0459	-0.156417	-1.0745			14596	b0459	-0.0526414	-0.376762		14596	b0459	-0.0161199	-0.111664		14596	b0459	0.0663608	0.488529			14596	b0459	-0.146793	-1.02598		14596	b0459	-0.0085582	-0.062709		14596	b0459	-0.00316162	-0.0233807
14597	b0460	-0.795309	-2.3929		14597	b0460	-0.619307	-2.28378		14597	b0460	-0.93007	-3.47485			14597	b0460	-0.862464	-3.06118		14597	b0460	-0.593363	-2.08413		14597	b0460	-0.625645	-1.85888			14597	b0460	-0.798231	-2.66183		14597	b0460	-0.911454	-3.33933		14597	b0460	-0.799902	-2.74005
14598	b0461	-0.0357846	-0.210878		14598	b0461	-0.0946849	-0.531025		14598	b0461	-0.0860393	-0.460115			14598	b0461	-0.0196043	-0.112955		14598	b0461	-0.0453734	-0.27207		14598	b0461	-0.0451508	-0.257296			14598	b0461	-0.088775	-0.550845		14598	b0461	-0.0635577	-0.372611		14598	b0461	0.094017	0.533451
14599	b0462	-0.00380048	-0.0297583		14599	b0462	-0.0504987	-0.389135		14599	b0462	-0.0874336	-0.674549			14599	b0462	-0.531635	-4.13947		14599	b0462	-0.150452	-1.15652		14599	b0462	-0.0501319	-0.387705			14599	b0462	-0.271289	-2.05261		14599	b0462	-0.183876	-1.42043		14599	b0462	-0.0610035	-0.473052
14600	b0463	-0.131685	-0.945699		14600	b0463	-0.168373	-1.15526		14600	b0463	-0.172929	-1.19483			14600	b0463	-0.743588	-5.10586		14600	b0463	-0.281633	-1.91742		14600	b0463	-0.24486	-1.76972			14600	b0463	-0.362771	-2.58295		14600	b0463	-0.269175	-1.82683		14600	b0463	-0.182683	-1.23027
14601	b0464	0.0542953	0.342907		14601	b0464	0.014501	0.091803		14601	b0464	-0.0369231	-0.227486			14601	b0464	0.13415	0.893304		14601	b0464	0.0375227	0.236955		14601	b0464	0.156895	0.955097			14601	b0464	0.0303713	0.192238		14601	b0464	0.127199	0.811416		14601	b0464	0.126501	0.839437
14602	b0465	-0.0331316	-0.271006		14602	b0465	-0.137616	-1.12313		14602	b0465	-0.118767	-0.962508			14602	b0465	-0.0357504	-0.291717		14602	b0465	-0.191624	-1.54277		14602	b0465	-0.0261262	-0.221316			14602	b0465	-0.00618894	-0.0501895		14602	b0465	-0.082283	-0.677126		14602	b0465	0.0161942	0.131761
14604	b0467	-0.39661	-1.75955		14604	b0467	-0.323612	-1.58332		14604	b0467	-0.377434	-1.48544			14604	b0467	-0.289991	-1.37995		14604	b0467	-0.198889	-1.01426		14604	b0467	-0.374765	-1.51787			14604	b0467	-0.395126	-1.8359		14604	b0467	-0.34924	-1.63916		14604	b0467	-0.248146	-1.07015
14605	b0468	-0.222593	-0.956499		14605	b0468	-0.160918	-0.78206		14605	b0468	-0.0833025	-0.383445			14605	b0468	-0.294782	-1.3201		14605	b0468	-0.0806772	-0.383804		14605	b0468	-0.00847823	-0.0484817			14605	b0468	-0.00046204	-0.00187828		14605	b0468	-0.191976	-0.799701		14605	b0468	-0.00818723	-0.0387945
14606	b0469	-0.375824	-1.91418		14606	b0469	-0.395283	-2.17673		14606	b0469	-0.585618	-3.07626			14606	b0469	-0.342572	-1.62172		14606	b0469	-0.421076	-2.00829		14606	b0469	-0.27482	-1.60969			14606	b0469	-0.280713	-1.36869		14606	b0469	-0.437652	-2.27454		14606	b0469	-0.406281	-2.34458
14608	b0471	0.0715855	0.161228		14608	b0471	-0.00207141	-0.00379762		14608	b0471	0.0622012	0.121569			14608	b0471	-0.134045	-0.246141		14608	b0471	-0.290122	-0.606417		14608	b0471	-0.103338	-0.178604			14608	b0471	-0.326694	-0.746142		14608	b0471	0.0988342	0.204933		14608	b0471	0.0161031	0.0368505
14609	b0472	-0.0500714	-0.251988		14609	b0472	-0.104188	-0.462755		14609	b0472	-0.250109	-1.29512			14609	b0472	-0.0711059	-0.355035		14609	b0472	-0.370247	-1.74194		14609	b0472	-0.0626038	-0.32243			14609	b0472	-0.132152	-0.682635		14609	b0472	-0.0324083	-0.169453		14609	b0472	-0.0281313	-0.136744
14610	b0473	-0.0345511	-0.222778		14610	b0473	-0.150843	-1.01188		14610	b0473	-0.0725101	-0.474819			14610	b0473	-0.0825111	-0.549179		14610	b0473	-0.187569	-1.1941		14610	b0473	0.0140115	0.087054			14610	b0473	-0.0939201	-0.581316		14610	b0473	-0.101501	-0.672246		14610	b0473	0.0235732	0.150664
14613	b0476	0.0215671	0.124709		14613	b0476	0.0680774	0.357665		14613	b0476	-0.0273838	-0.153195			14613	b0476	0.0931875	0.457808		14613	b0476	0.0760639	0.361289		14613	b0476	0.109994	0.591421			14613	b0476	0.0304721	0.170171		14613	b0476	0.0436285	0.224369		14613	b0476	0.0515907	0.27218
14614	b0477	-0.265982	-1.56906		14614	b0477	-0.169846	-0.972715		14614	b0477	-0.288623	-1.70906			14614	b0477	-0.280737	-1.76434		14614	b0477	-0.306586	-1.69817		14614	b0477	-0.101661	-0.606925			14614	b0477	-0.178746	-1.02385		14614	b0477	-0.346823	-1.95608		14614	b0477	-0.183886	-1.05761
14615	b0478	-0.25151	-1.54784		14615	b0478	-0.372544	-2.38131		14615	b0478	-0.387433	-2.56886			14615	b0478	-0.33403	-1.96369		14615	b0478	-0.300317	-1.77194		14615	b0478	-0.254354	-1.61944			14615	b0478	-0.397702	-2.26811		14615	b0478	-0.335027	-2.19648		14615	b0478	-0.22132	-1.23424
14616	b0479	-0.0875484	-0.399004		14616	b0479	-0.107746	-0.511173		14616	b0479	-0.19648	-0.838836			14616	b0479	-0.175217	-0.899539		14616	b0479	-0.0663247	-0.336624		14616	b0479	-6.58641e-05	-0.000306692			14616	b0479	0.0761357	0.349251		14616	b0479	-0.0830533	-0.381196		14616	b0479	-0.0157278	-0.0768877
14617	b0480	-0.0491305	-0.278956		14617	b0480	-0.112372	-0.687316		14617	b0480	-0.104056	-0.663394			14617	b0480	-0.025412	-0.175538		14617	b0480	-0.0249664	-0.148687		14617	b0480	-0.0131108	-0.0770356			14617	b0480	-0.24808	-1.46611		14617	b0480	-0.101081	-0.63165		14617	b0480	0.0390904	0.232215
14618	b0481	0.266129	0.913154		14618	b0481	0.10788	0.377884		14618	b0481	0.0596719	0.21172			14618	b0481	0.0664329	0.1952		14618	b0481	0.00588963	0.0217779		14618	b0481	-0.0710477	-0.221045			14618	b0481	-0.226779	-0.717704		14618	b0481	-0.144991	-0.403164		14618	b0481	0.0500842	0.135242
14619	b0482	0.0600622	0.375662		14619	b0482	0.113459	0.68573		14619	b0482	-0.00350142	-0.0194672			14619	b0482	0.00708526	0.044817		14619	b0482	-0.0532149	-0.312731		14619	b0482	0.0820591	0.546503			14619	b0482	0.0182016	0.102424		14619	b0482	0.0029721	0.0188477		14619	b0482	0.0370289	0.20658
14620	b0483	0.0207851	0.0913561		14620	b0483	-0.223666	-0.783187		14620	b0483	-0.103603	-0.395097			14620	b0483	-0.157298	-0.524035		14620	b0483	-0.0835826	-0.28416		14620	b0483	-0.206968	-0.634466			14620	b0483	-0.136522	-0.479097		14620	b0483	-0.0669928	-0.253895		14620	b0483	-0.226645	-0.825501
14621	b0484	-0.182555	-1.39672		14621	b0484	-0.151262	-1.1942		14621	b0484	-0.210511	-1.57295			14621	b0484	-0.201242	-1.50412		14621	b0484	-0.113548	-0.877757		14621	b0484	-0.0241616	-0.180461			14621	b0484	-0.212618	-1.58076		14621	b0484	-0.20964	-1.54059		14621	b0484	-0.0717443	-0.530645
14622	b0485	-0.131823	-0.67349		14622	b0485	-0.302384	-1.72809		14622	b0485	-0.34852	-1.83373			14622	b0485	-0.230448	-1.1026		14622	b0485	-0.265355	-1.27571		14622	b0485	-0.173986	-0.909475			14622	b0485	-0.103149	-0.581728		14622	b0485	-0.119216	-0.629643		14622	b0485	-0.10419	-0.619798
14623	b0486	0.125595	0.674179		14623	b0486	0.0260919	0.130767		14623	b0486	0.0519418	0.276919			14623	b0486	0.117063	0.638997		14623	b0486	0.0289333	0.148233		14623	b0486	0.0915587	0.523664			14623	b0486	0.0396133	0.200396		14623	b0486	0.122276	0.647282		14623	b0486	-0.00857781	-0.0416489
14624	b0487	0.138452	0.689942		14624	b0487	-0.0307348	-0.148596		14624	b0487	-0.201222	-0.989463			14624	b0487	-0.0955571	-0.456895		14624	b0487	-0.351907	-1.29257		14624	b0487	0.174763	0.765825			14624	b0487	-0.31668	-1.08615		14624	b0487	0.0369523	0.184053		14624	b0487	-0.24264	-1.1517
14625	b0488	-0.429906	-2.54491		14625	b0488	-0.561945	-3.416		14625	b0488	-0.428526	-2.69087			14625	b0488	-0.381709	-2.20448		14625	b0488	-0.616399	-3.19559		14625	b0488	-0.287644	-1.66393			14625	b0488	-0.336505	-1.96542		14625	b0488	-0.314746	-1.88794		14625	b0488	-0.345142	-1.94867
14626	b0489	0.348552	1.47508		14626	b0489	0.271206	1.19353		14626	b0489	0.0583773	0.26522			14626	b0489	0.383356	1.67316		14626	b0489	0.173912	0.887596		14626	b0489	0.173859	0.765035			14626	b0489	-0.00946904	-0.0452734		14626	b0489	0.230527	1.13591		14626	b0489	0.188462	0.789993
14627	b0490	-0.325707	-1.39047		14627	b0490	-0.241058	-1.22676		14627	b0490	-0.395283	-1.73947			14627	b0490	-0.326814	-1.54022		14627	b0490	-0.360564	-1.61607		14627	b0490	-0.298689	-1.29205			14627	b0490	-0.302445	-1.19694		14627	b0490	-0.385032	-1.79981		14627	b0490	-0.438651	-1.92665
14628	b0491	-0.191557	-0.797274		14628	b0491	-0.496548	-2.17222		14628	b0491	-0.26074	-1.21654			14628	b0491	-0.251134	-1.16135		14628	b0491	-0.162582	-0.656027		14628	b0491	-0.267948	-1.1936			14628	b0491	-0.240432	-1.10152		14628	b0491	-0.264524	-1.13962		14628	b0491	-0.202217	-0.897094
14629	b0492	-0.0398898	-0.188517		14629	b0492	0.0628452	0.30792		14629	b0492	-0.017053	-0.0835613			14629	b0492	0.0953755	0.454791		14629	b0492	-0.075457	-0.391526		14629	b0492	0.0055113	0.026324			14629	b0492	-0.0642474	-0.261525		14629	b0492	0.111693	0.55546		14629	b0492	0.0929194	0.449622
14630	b0493	0.113765	0.569595		14630	b0493	0.066262	0.31909		14630	b0493	0.140055	0.702945			14630	b0493	0.233656	1.25654		14630	b0493	0.00865872	0.0451383		14630	b0493	0.154643	0.859921			14630	b0493	-0.156278	-0.676495		14630	b0493	0.150986	0.711023		14630	b0493	0.0579029	0.295189
14631	b0494	0.10567	0.609008		14631	b0494	-0.0888258	-0.404654		14631	b0494	-0.0860415	-0.517595			14631	b0494	0.00842308	0.0410651		14631	b0494	0.00591018	0.0247147		14631	b0494	0.015847	0.0821415			14631	b0494	-0.00674146	-0.0410173		14631	b0494	0.122288	0.586417		14631	b0494	0.10072	0.536775
14632	b0495	-0.171368	-0.696547		14632	b0495	-0.0363309	-0.135793		14632	b0495	-0.0499388	-0.190793			14632	b0495	-0.00541923	-0.0234088		14632	b0495	-0.19775	-0.873413		14632	b0495	-0.0264301	-0.116491			14632	b0495	-0.507395	-2.04943		14632	b0495	-0.0502781	-0.23164		14632	b0495	-0.035888	-0.149224
14633	b0496	0.304551	1.94648		14633	b0496	0.302119	2.03364		14633	b0496	0.244043	1.64276			14633	b0496	0.234084	1.61173		14633	b0496	0.313341	1.84346		14633	b0496	0.273381	1.75453			14633	b0496	0.216266	1.37474		14633	b0496	0.246818	1.57224		14633	b0496	0.258893	1.69129
14634	b0497	0.0968336	0.778822		14634	b0497	0.122659	1.01287		14634	b0497	0.0852223	0.689364			14634	b0497	0.106346	0.863716		14634	b0497	0.115593	0.950287		14634	b0497	0.108212	0.888999			14634	b0497	0.0590504	0.465418		14634	b0497	0.0845682	0.700295		14634	b0497	0.164216	1.35464
14636	b0499	-0.7566	-1.49506		14636	b0499	-0.798887	-2.0511		14636	b0499	-1.13332	-2.8608			14636	b0499	-0.720259	-1.4737		14636	b0499	-0.887638	-1.82153		14636	b0499	-0.826079	-1.91545			14636	b0499	-0.582668	-1.44436		14636	b0499	-0.727736	-1.52762		14636	b0499	-0.742947	-1.76968
14640	b0503	0.242919	0.80364		14640	b0503	0.438026	1.96298		14640	b0503	0.446947	1.95979			14640	b0503	0.244105	0.799975		14640	b0503	0.194848	0.715935		14640	b0503	0.242468	0.676321			14640	b0503	0.0454237	0.179063		14640	b0503	0.396913	1.52664		14640	b0503	0.4501	1.97672
14641	b0504	0.0916664	0.214187		14641	b0504	0.154667	0.323787		14641	b0504	0.0944482	0.208047			14641	b0504	0.0464154	0.0980643		14641	b0504	0.240462	0.504276		14641	b0504	0.0974425	0.230908			14641	b0504	-0.0421827	-0.0793126		14641	b0504	-0.0551727	-0.114817		14641	b0504	0.0517376	0.111939
14642	b0505	-0.180504	-0.702085		14642	b0505	-0.207866	-0.794553		14642	b0505	-0.12411	-0.464157			14642	b0505	-0.282417	-1.00842		14642	b0505	-0.0364582	-0.114523		14642	b0505	0.0267051	0.108326			14642	b0505	-0.297312	-1.05702		14642	b0505	-0.123243	-0.517663		14642	b0505	-0.095214	-0.334501
14643	b0506	-0.0686496	-0.251348		14643	b0506	-0.267173	-0.966929		14643	b0506	-0.244323	-0.938572			14643	b0506	-0.158684	-0.632761		14643	b0506	-0.132348	-0.515048		14643	b0506	0.00429103	0.0179093			14643	b0506	-0.208917	-0.811463		14643	b0506	-0.171015	-0.684007		14643	b0506	-0.0840133	-0.291722
14644	b0507	0.0395836	0.214252		14644	b0507	0.0265308	0.150556		14644	b0507	0.0726229	0.389022			14644	b0507	0.0440151	0.265901		14644	b0507	0.0272107	0.150792		14644	b0507	0.0117715	0.0666922			14644	b0507	0.0320527	0.175862		14644	b0507	0.0921163	0.545816		14644	b0507	0.0686708	0.390491
14646	b0509	-0.0555578	-0.237759		14646	b0509	0.0306613	0.133774		14646	b0509	0.019012	0.0795356			14646	b0509	-0.132027	-0.563874		14646	b0509	-0.182415	-0.771186		14646	b0509	-0.20211	-0.858703			14646	b0509	-0.0768652	-0.328352		14646	b0509	-0.0901807	-0.420151		14646	b0509	-0.0355329	-0.146682
14648	b0511	-0.255869	-1.77066		14648	b0511	-0.409853	-2.78485		14648	b0511	-0.326529	-2.23003			14648	b0511	-0.249364	-1.70747		14648	b0511	-0.270344	-1.7747		14648	b0511	-0.429342	-2.87427			14648	b0511	-0.268581	-1.77606		14648	b0511	-0.291176	-2.02723		14648	b0511	-0.205258	-1.40956
14649	b0512	0.394836	2.97129		14649	b0512	0.387923	2.78102		14649	b0512	0.360856	2.6096			14649	b0512	0.375074	2.69937		14649	b0512	0.346613	2.49033		14649	b0512	0.357459	2.60052			14649	b0512	0.372746	2.72367		14649	b0512	0.427798	3.1641		14649	b0512	0.386673	2.72869
14650	b0513	0.0927435	0.746614		14650	b0513	0.100742	0.738463		14650	b0513	0.110776	0.849208			14650	b0513	0.0941729	0.751053		14650	b0513	0.0227026	0.169512		14650	b0513	0.0658385	0.500233			14650	b0513	0.0937988	0.709464		14650	b0513	0.101102	0.769247		14650	b0513	0.12249	0.935597
14651	b0514	0.21175	1.21129		14651	b0514	0.289068	1.60959		14651	b0514	0.277732	1.57652			14651	b0514	0.247443	1.48457		14651	b0514	0.201116	1.14382		14651	b0514	0.12216	0.693874			14651	b0514	0.247683	1.43877		14651	b0514	0.261311	1.47727		14651	b0514	0.283122	1.59198
14652	b0515	-0.0433811	-0.290382		14652	b0515	-0.0116741	-0.0805868		14652	b0515	0.0286909	0.195663			14652	b0515	-0.00628524	-0.0444934		14652	b0515	-0.0527584	-0.363501		14652	b0515	-0.022649	-0.15622			14652	b0515	0.0123623	0.0847393		14652	b0515	-0.0501424	-0.342123		14652	b0515	-0.0200259	-0.141049
14653	b0516	-0.102805	-0.743098		14653	b0516	-0.10092	-0.739459		14653	b0516	-0.10356	-0.767543			14653	b0516	-0.136296	-0.992017		14653	b0516	-0.130138	-0.935239		14653	b0516	-0.182414	-1.30497			14653	b0516	-0.183433	-1.33276		14653	b0516	-0.11896	-0.887722		14653	b0516	-0.149583	-1.08735
14654	b0517	0.0977035	0.604439		14654	b0517	0.135488	0.834143		14654	b0517	0.159145	0.954502			14654	b0517	0.0823863	0.444458		14654	b0517	0.162524	1.03274		14654	b0517	0.0467693	0.275108			14654	b0517	0.0312317	0.172673		14654	b0517	0.0749105	0.485073		14654	b0517	0.0325427	0.187809
14655	b0518	0.0693804	0.43793		14655	b0518	0.0653554	0.356749		14655	b0518	0.00128646	0.00792568			14655	b0518	0.109191	0.736684		14655	b0518	0.110023	0.628077		14655	b0518	0.0209488	0.124342			14655	b0518	0.101507	0.682734		14655	b0518	0.0338941	0.217869		14655	b0518	0.0670197	0.419501
14657	b0520	0.286263	1.15		14657	b0520	0.370674	1.5219		14657	b0520	0.324368	1.17937			14657	b0520	0.301862	1.07682		14657	b0520	0.302465	1.251		14657	b0520	0.244364	0.813633			14657	b0520	0.509802	1.75293		14657	b0520	0.334023	1.23605		14657	b0520	0.413399	1.59719
14658	b0521	-0.057341	-0.28128		14658	b0521	0.0141923	0.0764947		14658	b0521	-0.154963	-0.72147			14658	b0521	-0.0813716	-0.396263		14658	b0521	-0.114473	-0.565133		14658	b0521	0.0484809	0.231078			14658	b0521	0.00735778	0.0317401		14658	b0521	0.135261	0.670326		14658	b0521	0.00338997	0.0135933
14659	b0522	-0.482348	-2.12133		14659	b0522	-0.344517	-1.64925		14659	b0522	-0.567448	-2.64897			14659	b0522	-0.210499	-0.944146		14659	b0522	-0.332081	-1.70372		14659	b0522	-0.392824	-1.66089			14659	b0522	-0.313144	-1.54482		14659	b0522	-0.434777	-1.95574		14659	b0522	-0.551624	-2.51074
14660	b0523	-0.493863	-1.91036		14660	b0523	-0.156713	-0.570918		14660	b0523	-0.553151	-1.78686			14660	b0523	-0.187959	-0.699951		14660	b0523	-0.591462	-1.81582		14660	b0523	-0.730881	-2.76561			14660	b0523	-0.415484	-1.05244		14660	b0523	-0.623807	-2.2602		14660	b0523	-0.84848	-2.44719
14664	b0527	-0.0325976	-0.0901068		14664	b0527	0.0451792	0.126529		14664	b0527	0.205301	0.600404			14664	b0527	0.0462623	0.123596		14664	b0527	0.0296283	0.0751335		14664	b0527	0.0987334	0.331244			14664	b0527	-0.163017	-0.441204		14664	b0527	0.0122708	0.0354598		14664	b0527	0.0544248	0.142139
14668	b0531	-0.703122	-2.45894		14668	b0531	-0.592366	-2.10037		14668	b0531	-0.45991	-1.98799			14668	b0531	-0.634801	-2.54164		14668	b0531	-0.387546	-1.32383		14668	b0531	-0.65887	-2.54161			14668	b0531	-0.574051	-2.0348		14668	b0531	-0.293667	-1.2025		14668	b0531	-0.448229	-1.67356
14669	b0532	-0.313938	-2.35353		14669	b0532	-0.325423	-2.38275		14669	b0532	-0.301292	-2.27398			14669	b0532	-0.398366	-3.06294		14669	b0532	-0.313868	-2.34767		14669	b0532	-0.368432	-2.77733			14669	b0532	-0.424375	-3.157		14669	b0532	-0.313413	-2.32362		14669	b0532	-0.192496	-1.4283
14670	b0533	-0.41455	-1.87415		14670	b0533	-0.500003	-2.24638		14670	b0533	-0.442669	-1.86115			14670	b0533	-0.309679	-1.54555		14670	b0533	-0.361095	-1.65864		14670	b0533	-0.572032	-2.58596			14670	b0533	-0.33465	-1.38497		14670	b0533	-0.507995	-2.20169		14670	b0533	-0.597284	-2.64576
14671	b0534	-0.321541	-1.66313		14671	b0534	-0.318561	-1.44166		14671	b0534	-0.172008	-0.772775			14671	b0534	-0.111138	-0.547151		14671	b0534	-0.322279	-1.43485		14671	b0534	-0.226674	-1.08049			14671	b0534	-0.200689	-0.883027		14671	b0534	-0.193282	-0.867751		14671	b0534	-0.219513	-1.10824
14673	b0537	0.127994	0.875941		14673	b0537	0.0744941	0.513137		14673	b0537	0.145838	1.02232			14673	b0537	0.0608913	0.409942		14673	b0537	0.0424907	0.278107		14673	b0537	0.0393761	0.278599			14673	b0537	-0.000768303	-0.00529015		14673	b0537	0.0286187	0.194918		14673	b0537	0.04331	0.297413
14674	b4508	0.558075	2.00402		14674	b4508	0.736558	2.52654		14674	b4508	1.02118	3.39108			14674	b4508	0.858325	3.21991		14674	b4508	0.354935	0.953267		14674	b4508	0.759455	2.75611			14674	b4508	0.473656	1.63186		14674	b4508	0.579703	2.19883		14674	b4508	0.843886	2.30996
14675	b0539	-0.0361203	-0.168137		14675	b0539	0.0340389	0.16578		14675	b0539	0.045579	0.218503			14675	b0539	0.0365057	0.142528		14675	b0539	0.0800964	0.273763		14675	b0539	-0.0294423	-0.135747			14675	b0539	-0.0816376	-0.320415		14675	b0539	-0.0453546	-0.191196		14675	b0539	-0.150044	-0.621104
14679	b0543	0.127495	0.868736		14679	b0543	0.1195	0.823449		14679	b0543	0.203991	1.44888			14679	b0543	0.169349	1.20466		14679	b0543	0.137218	0.931955		14679	b0543	0.120166	0.866718			14679	b0543	0.238828	1.61745		14679	b0543	0.204974	1.52628		14679	b0543	0.208164	1.45377
14681	b0545	-0.16045	-0.832995		14681	b0545	-0.141692	-0.811705		14681	b0545	-0.00952662	-0.0566808			14681	b0545	-0.13416	-0.752876		14681	b0545	-0.159478	-0.837145		14681	b0545	-0.264021	-1.46642			14681	b0545	-0.330887	-1.89132		14681	b0545	-0.00838077	-0.0449949		14681	b0545	-0.128427	-0.750977
14682	b0546	-0.40515	-1.12207		14682	b0546	-0.290555	-0.799379		14682	b0546	-0.339637	-0.914103			14682	b0546	-0.385143	-1.02042		14682	b0546	-0.445914	-0.93174		14682	b0546	-0.371049	-0.957949			14682	b0546	-0.155649	-0.329094		14682	b0546	-0.468992	-1.01498		14682	b0546	-0.424478	-1.17325
14683	b0547	-0.237087	-0.860822		14683	b0547	-0.159631	-0.570417		14683	b0547	-0.0352352	-0.111055			14683	b0547	-0.166393	-0.627275		14683	b0547	-0.248955	-0.78533		14683	b0547	-0.180663	-0.686687			14683	b0547	-0.0018739	-0.00605162		14683	b0547	-0.0386289	-0.144415		14683	b0547	-0.172088	-0.517442
14684	b0548	-0.0381231	-0.123998		14684	b0548	0.0574266	0.153721		14684	b0548	0.134141	0.383533			14684	b0548	0.328167	0.942015		14684	b0548	0.108749	0.354717		14684	b0548	0.024656	0.0737719			14684	b0548	-0.0177557	-0.0553526		14684	b0548	0.186956	0.571404		14684	b0548	0.0841029	0.254596
14686	b0550	0.035309	0.110362		14686	b0550	0.011211	0.0301509		14686	b0550	-0.131001	-0.450908			14686	b0550	-0.147034	-0.503502		14686	b0550	-0.013341	-0.0435626		14686	b0550	-0.242844	-0.836594			14686	b0550	0.0599417	0.170079		14686	b0550	-0.518984	-1.53101		14686	b0550	-0.0667064	-0.226376
14687	b0551	0.103112	0.703771		14687	b0551	0.0550916	0.395075		14687	b0551	0.127089	0.839183			14687	b0551	0.107123	0.756624		14687	b0551	0.0279931	0.19161		14687	b0551	0.025013	0.171238			14687	b0551	0.065348	0.430978		14687	b0551	0.0725325	0.503824		14687	b0551	0.154955	1.08292
14689	b0553	0.231673	1.62584		14689	b0553	0.310285	2.19008		14689	b0553	0.332781	2.36934			14689	b0553	0.294643	2.00939		14689	b0553	0.250736	1.80662		14689	b0553	0.253252	1.78696			14689	b0553	0.232847	1.594		14689	b0553	0.297739	2.01506		14689	b0553	0.342896	2.36969
14690	b0554	0.0336763	0.229597		14690	b0554	0.12729	0.862075		14690	b0554	0.0982937	0.695191			14690	b0554	-0.0327114	-0.213322		14690	b0554	0.101389	0.667485		14690	b0554	-0.0940151	-0.603436			14690	b0554	0.126726	0.841324		14690	b0554	0.016597	0.10607		14690	b0554	0.0919743	0.618933
14691	b0555	-0.0565541	-0.324122		14691	b0555	-0.112233	-0.625909		14691	b0555	-0.0869343	-0.471124			14691	b0555	-0.0311261	-0.178264		14691	b0555	-0.0769329	-0.464918		14691	b0555	-0.184606	-1.10804			14691	b0555	-0.069398	-0.404933		14691	b0555	-0.0033838	-0.0190192		14691	b0555	0.0173916	0.104653
14692	b0556	-0.164862	-0.622868		14692	b0556	-0.283396	-1.02567		14692	b0556	-0.166891	-0.594214			14692	b0556	-0.260069	-0.96082		14692	b0556	-0.312105	-0.93838		14692	b0556	-0.254734	-0.764821			14692	b0556	0.0308713	0.093945		14692	b0556	-0.194247	-0.749421		14692	b0556	-0.18014	-0.603902
14693	b0557	0.193476	0.76599		14693	b0557	0.302629	1.34923		14693	b0557	0.3316	1.41368			14693	b0557	0.239321	0.99443		14693	b0557	0.271807	1.30664		14693	b0557	0.231027	1.05028			14693	b0557	0.343569	1.54813		14693	b0557	0.28841	1.47374		14693	b0557	0.214945	1.08608
14695	b0559	-0.452403	-2.27746		14695	b0559	-0.38695	-1.91375		14695	b0559	-0.357514	-1.90237			14695	b0559	-0.291581	-1.3497		14695	b0559	-0.406237	-1.77591		14695	b0559	-0.379921	-1.84765			14695	b0559	-0.582905	-2.20316		14695	b0559	-0.415342	-1.87868		14695	b0559	-0.383414	-1.86805
14697	b0561	0.587715	2.08484		14697	b0561	0.773138	2.92555		14697	b0561	0.604404	2.14016			14697	b0561	0.655775	2.127		14697	b0561	0.578298	1.89313		14697	b0561	0.520259	1.68621			14697	b0561	0.826774	2.6817		14697	b0561	0.531592	1.8162		14697	b0561	0.572654	2.07568
14698	b0562	-0.00701859	-0.0464298		14698	b0562	-0.000962654	-0.00672446		14698	b0562	-0.0539693	-0.366526			14698	b0562	-0.0351059	-0.239929		14698	b0562	0.0129332	0.0806808		14698	b0562	-0.149497	-1.02643			14698	b0562	0.0310967	0.219439		14698	b0562	0.0152919	0.10233		14698	b0562	-0.106671	-0.694511
14699	b0563	-0.293274	-1.11324		14699	b0563	-0.274782	-1.2261		14699	b0563	-0.413815	-1.6508			14699	b0563	-0.560949	-2.04216		14699	b0563	-0.239075	-0.85341		14699	b0563	-0.551542	-2.07934			14699	b0563	-0.51118	-2.20929		14699	b0563	-0.521874	-2.03528		14699	b0563	-0.442859	-1.52284
14701	b0565	0.195451	1.46576		14701	b0565	0.211897	1.5954		14701	b0565	0.221721	1.6144			14701	b0565	0.195046	1.44022		14701	b0565	0.241962	1.74725		14701	b0565	0.116278	0.852474			14701	b0565	0.202136	1.4816		14701	b0565	0.198536	1.43728		14701	b0565	0.162162	1.18543
14702	b0566	-0.0318391	-0.186413		14702	b0566	-0.0526708	-0.317677		14702	b0566	-0.130243	-0.719899			14702	b0566	-0.0758641	-0.458877		14702	b0566	-0.0345475	-0.188164		14702	b0566	-0.124132	-0.671042			14702	b0566	-0.21688	-1.20331		14702	b0566	-0.0948111	-0.550947		14702	b0566	-0.0993167	-0.580803
14703	b0567	0.0720761	0.427982		14703	b0567	0.113471	0.800491		14703	b0567	0.155085	1.00815			14703	b0567	0.169132	1.16347		14703	b0567	0.0581432	0.372845		14703	b0567	0.0185845	0.120516			14703	b0567	0.260982	1.70025		14703	b0567	0.119584	0.75424		14703	b0567	0.107596	0.625587
14704	b0568	0.113132	0.809527		14704	b0568	0.0933247	0.680885		14704	b0568	0.229289	1.69009			14704	b0568	0.063926	0.472136		14704	b0568	0.13114	0.965303		14704	b0568	0.0547812	0.396784			14704	b0568	0.0584179	0.41746		14704	b0568	0.201579	1.53784		14704	b0568	0.107609	0.771392
14705	b0569	0.134575	0.838992		14705	b0569	0.210159	1.35275		14705	b0569	0.200456	1.24379			14705	b0569	0.113664	0.730771		14705	b0569	0.120771	0.772281		14705	b0569	0.0481049	0.299079			14705	b0569	0.195489	1.20521		14705	b0569	0.105598	0.627324		14705	b0569	0.119887	0.734765
14706	b0570	0.0339987	0.186233		14706	b0570	-0.034098	-0.215001		14706	b0570	-0.00960192	-0.0535181			14706	b0570	0.053457	0.304231		14706	b0570	-0.0271246	-0.145339		14706	b0570	-0.0175812	-0.108151			14706	b0570	-0.00733047	-0.0445832		14706	b0570	0.0963122	0.545022		14706	b0570	-0.00877244	-0.0502193
14707	b0571	0.160485	1.03469		14707	b0571	0.196066	1.3416		14707	b0571	0.227535	1.52419			14707	b0571	0.184304	1.26984		14707	b0571	0.230354	1.42513		14707	b0571	0.174377	1.18906			14707	b0571	0.218856	1.24008		14707	b0571	0.145027	1.00585		14707	b0571	0.131946	0.896651
14708	b0572	-0.0880136	-0.651904		14708	b0572	0.0359325	0.25371		14708	b0572	0.0495126	0.348747			14708	b0572	-0.0363273	-0.265653		14708	b0572	0.0135343	0.0969746		14708	b0572	-0.113184	-0.814467			14708	b0572	-0.131261	-0.92141		14708	b0572	0.0176405	0.131469		14708	b0572	-0.0308486	-0.221414
14709	b0573	-0.0649477	-0.45607		14709	b0573	0.0670374	0.455495		14709	b0573	-0.00617539	-0.0434503			14709	b0573	-0.026912	-0.192858		14709	b0573	0.140952	0.990767		14709	b0573	-0.0637454	-0.4635			14709	b0573	0.0169321	0.119907		14709	b0573	0.0632568	0.455877		14709	b0573	0.038156	0.272647
14710	b0574	0.0194706	0.0958253		14710	b0574	0.124908	0.677		14710	b0574	0.144288	0.784242			14710	b0574	0.208232	1.12573		14710	b0574	0.170879	0.883981		14710	b0574	-0.0525838	-0.270102			14710	b0574	0.0613176	0.323557		14710	b0574	0.118815	0.630634		14710	b0574	0.178452	1.07744
14711	b0575	0.102005	0.671839		14711	b0575	0.235541	1.58252		14711	b0575	0.257973	1.75419			14711	b0575	0.20611	1.41952		14711	b0575	0.188147	1.18169		14711	b0575	0.0442881	0.282201			14711	b0575	0.0322283	0.19667		14711	b0575	0.190097	1.23522		14711	b0575	0.109741	0.777885
14712	b0576	0.104467	0.616516		14712	b0576	0.204644	1.38775		14712	b0576	0.161115	1.01748			14712	b0576	0.0181367	0.108679		14712	b0576	0.187392	1.13118		14712	b0576	0.066372	0.40974			14712	b0576	0.145903	0.788603		14712	b0576	0.131648	0.829221		14712	b0576	0.145406	0.94087
14713	b0577	-0.00702962	-0.0605352		14713	b0577	0.0444294	0.383619		14713	b0577	0.0554578	0.477533			14713	b0577	-0.00600074	-0.0513078		14713	b0577	0.00189107	0.0159973		14713	b0577	-0.0645683	-0.554817			14713	b0577	0.00448809	0.038095		14713	b0577	0.0636586	0.542845		14713	b0577	0.0229498	0.197766
14714	b0578	-0.148437	-1.04799		14714	b0578	-0.213569	-1.48513		14714	b0578	-0.0562508	-0.401238			14714	b0578	-0.175619	-1.21841		14714	b0578	-0.160014	-0.975496		14714	b0578	-0.193918	-1.3872			14714	b0578	0.0772324	0.406859		14714	b0578	-0.196058	-1.39038		14714	b0578	-0.222424	-1.26561
14715	b0579	0.605441	1.55847		14715	b0579	0.428241	0.895105		14715	b0579	0.34833	0.77241			14715	b0579	0.388192	1.08469		14715	b0579	0.58243	1.56572		14715	b0579	0.418876	1.2044			14715	b0579	0.349892	0.761486		14715	b0579	0.556258	1.13645		14715	b0579	0.552014	1.32436
14716	b0580	-0.42123	-1.04972		14716	b0580	-0.363194	-0.973761		14716	b0580	-0.252932	-0.755745			14716	b0580	-0.399582	-0.912765		14716	b0580	-0.548262	-1.62094		14716	b0580	-0.538666	-1.75104			14716	b0580	-0.201583	-0.542989		14716	b0580	-0.31283	-1.05896		14716	b0580	-0.381816	-1.23719
14717	b0581	0.032122	0.20423		14717	b0581	-0.000784181	-0.00547665		14717	b0581	0.0226837	0.150842			14717	b0581	0.0502429	0.281944		14717	b0581	0.0741569	0.484457		14717	b0581	0.0377147	0.261582			14717	b0581	-0.0896736	-0.631962		14717	b0581	0.00405123	0.0260749		14717	b0581	0.061652	0.444547
14719	b0583	0.325844	0.960905		14719	b0583	0.400113	1.09062		14719	b0583	0.459669	1.33324			14719	b0583	0.377922	0.965625		14719	b0583	0.279613	0.860762		14719	b0583	0.259795	0.799151			14719	b0583	0.448308	1.08239		14719	b0583	0.495367	1.5773		14719	b0583	0.335423	0.803996
14720	b0584	-0.754805	-5.31909		14720	b0584	-0.807908	-5.27565		14720	b0584	-0.936638	-6.37212			14720	b0584	-1.03338	-7.95938		14720	b0584	-0.839165	-4.74792		14720	b0584	-1.4977	-9.6951			14720	b0584	-0.94307	-6.27833		14720	b0584	-1.37134	-9.05857		14720	b0584	-1.66577	-10.7502
14721	b0585	-1.57828	-6.53909		14721	b0585	-1.45359	-5.84948		14721	b0585	-1.94635	-7.81251			14721	b0585	-1.52045	-6.06874		14721	b0585	-2.10076	-6.99649		14721	b0585	-1.81125	-7.62629			14721	b0585	-1.39164	-5.33925		14721	b0585	-2.0601	-8.07316		14721	b0585	-2.32374	-8.77292
14722	b0586	0.165252	1.23064		14722	b0586	0.26148	1.96801		14722	b0586	0.267943	2.04757			14722	b0586	0.235424	1.76437		14722	b0586	0.135456	1.00181		14722	b0586	0.174337	1.29062			14722	b0586	0.114554	0.833828		14722	b0586	0.26652	1.92638		14722	b0586	0.17692	1.26536
14723	b0587	-0.150051	-0.856524		14723	b0587	-0.150439	-0.924079		14723	b0587	-0.192041	-0.973278			14723	b0587	-0.281504	-1.73254		14723	b0587	-0.13465	-0.779218		14723	b0587	-0.350621	-1.96539			14723	b0587	-0.259056	-1.57535		14723	b0587	-0.180033	-1.0098		14723	b0587	-0.148004	-0.841119
14724	b0588	-0.791037	-3.46957		14724	b0588	-0.745985	-3.6459		14724	b0588	-1.0843	-5.38657			14724	b0588	-1.02451	-4.68561		14724	b0588	-0.977377	-4.79798		14724	b0588	-1.49358	-8.71744			14724	b0588	-1.01802	-4.40437		14724	b0588	-1.3	-7.32905		14724	b0588	-1.82661	-7.26033
14725	b0589	-0.761293	-3.53652		14725	b0589	-0.760763	-3.83724		14725	b0589	-0.9605	-4.1159			14725	b0589	-1.11464	-4.50114		14725	b0589	-1.16353	-4.30425		14725	b0589	-1.88058	-8.90256			14725	b0589	-1.32542	-4.88673		14725	b0589	-1.47304	-6.52737		14725	b0589	-1.91491	-8.66174
14726	b0590	-0.797076	-3.95389		14726	b0590	-0.7351	-3.94627		14726	b0590	-1.01953	-5.08314			14726	b0590	-1.14581	-5.52065		14726	b0590	-1.15227	-5.44583		14726	b0590	-1.74257	-7.72272			14726	b0590	-0.993778	-4.57309		14726	b0590	-1.38222	-7.75838		14726	b0590	-1.96287	-10.3773
14727	b0591	0.0154559	0.103928		14727	b0591	0.128053	0.865453		14727	b0591	0.0521391	0.333517			14727	b0591	-0.0219806	-0.150448		14727	b0591	0.136189	0.916671		14727	b0591	-0.00126594	-0.00830192			14727	b0591	0.0262343	0.165981		14727	b0591	0.0986041	0.642127		14727	b0591	0.0303343	0.207442
14728	b0592	-0.842302	-4.06519		14728	b0592	-0.976583	-4.81678		14728	b0592	-1.25391	-6.08811			14728	b0592	-1.28128	-7.07271		14728	b0592	-1.21799	-5.92968		14728	b0592	-1.75142	-8.42075			14728	b0592	-1.17113	-5.48142		14728	b0592	-1.52208	-6.92337		14728	b0592	-1.94835	-9.48547
14729	b0593	0.186745	1.10035		14729	b0593	0.174728	1.11445		14729	b0593	0.188715	1.11999			14729	b0593	0.10885	0.676547		14729	b0593	0.0993618	0.609988		14729	b0593	0.130273	0.793024			14729	b0593	0.0907774	0.47651		14729	b0593	0.265732	1.57613		14729	b0593	0.0885581	0.566713
14730	b0594	-0.0163424	-0.0957191		14730	b0594	0.0421314	0.2394		14730	b0594	0.0326906	0.213748			14730	b0594	0.096431	0.663167		14730	b0594	-0.120404	-0.701307		14730	b0594	-0.00156918	-0.00949125			14730	b0594	-0.00904178	-0.0539125		14730	b0594	0.0897141	0.54969		14730	b0594	-0.111832	-0.643516
14731	b0595	0.170979	0.888541		14731	b0595	0.249586	1.18607		14731	b0595	0.273657	1.32888			14731	b0595	0.140296	0.662802		14731	b0595	0.255111	1.19462		14731	b0595	0.104086	0.520304			14731	b0595	0.105534	0.502183		14731	b0595	0.210644	0.983033		14731	b0595	0.174615	0.812961
14732	b0596	0.108667	0.504846		14732	b0596	0.1643	0.914383		14732	b0596	0.151323	0.777589			14732	b0596	0.0843132	0.502447		14732	b0596	-0.0519299	-0.256402		14732	b0596	0.026122	0.144049			14732	b0596	0.0644202	0.294799		14732	b0596	0.155982	0.726939		14732	b0596	0.0815027	0.432083
14733	b0597	-0.40134	-1.19696		14733	b0597	-0.113519	-0.488692		14733	b0597	-0.269144	-0.921935			14733	b0597	-0.366269	-1.29973		14733	b0597	-0.392682	-1.32484		14733	b0597	-0.237772	-0.814059			14733	b0597	-0.29628	-1.06706		14733	b0597	-0.306294	-1.17649		14733	b0597	-0.253868	-0.863833
14734	b0598	-0.00141734	-0.0110507		14734	b0598	0.0426398	0.33311		14734	b0598	0.0763318	0.585067			14734	b0598	-0.0117621	-0.0914558		14734	b0598	0.0423955	0.322206		14734	b0598	0.0671518	0.51548			14734	b0598	0.0294444	0.233057		14734	b0598	0.0854546	0.669197		14734	b0598	0.0219061	0.170113
14736	b0599	-0.131884	-0.834363		14736	b0599	-0.0384678	-0.239512		14736	b0599	-0.03062	-0.195791			14736	b0599	-0.164764	-1.03768		14736	b0599	0.0430059	0.270373		14736	b0599	-0.165582	-0.972748			14736	b0599	-0.0744429	-0.51586		14736	b0599	-0.084604	-0.49322		14736	b0599	-0.0920598	-0.586344
14737	b0600	-0.112494	-0.701838		14737	b0600	0.0685615	0.389622		14737	b0600	0.0846246	0.515535			14737	b0600	0.0613376	0.341967		14737	b0600	-0.0408359	-0.23674		14737	b0600	0.00523781	0.0300923			14737	b0600	-0.0980033	-0.547718		14737	b0600	0.0498747	0.274848		14737	b0600	0.0398677	0.269585
14738	b0601	0.0959345	0.525423		14738	b0601	0.149828	0.954626		14738	b0601	0.233453	1.38424			14738	b0601	0.0986073	0.666564		14738	b0601	0.177792	1.02258		14738	b0601	0.232749	1.38191			14738	b0601	0.116236	0.667579		14738	b0601	0.0258913	0.15129		14738	b0601	0.263693	1.7153
14739	b0602	-0.0831048	-0.448349		14739	b0602	-0.12729	-0.779665		14739	b0602	-0.0731385	-0.381907			14739	b0602	-0.0553546	-0.290581		14739	b0602	-0.0997534	-0.528209		14739	b0602	-0.00113177	-0.00573969			14739	b0602	-0.145903	-0.750215		14739	b0602	-0.0418449	-0.219183		14739	b0602	-0.0240327	-0.123432
14741	b0604	0.0514074	0.189103		14741	b0604	0.102545	0.340634		14741	b0604	0.0449101	0.139798			14741	b0604	0.00115427	0.00405144		14741	b0604	0.00754216	0.0257201		14741	b0604	0.0289789	0.0971251			14741	b0604	-0.220283	-0.718005		14741	b0604	0.0296764	0.114125		14741	b0604	0.150588	0.551943
14742	b0605	-0.607493	-1.08432		14742	b0605	-0.605662	-1.83301		14742	b0605	-1.26939	-2.92318			14742	b0605	-0.471511	-0.888815		14742	b0605	-0.528166	-1.41783		14742	b0605	-0.703482	-1.58847			14742	b0605	-0.53824	-0.991989		14742	b0605	-0.517248	-1.2476		14742	b0605	-0.80839	-1.54673
14743	b0606	-0.134222	-0.647946		14743	b0606	-0.100934	-0.488231		14743	b0606	-0.0878378	-0.379866			14743	b0606	-0.322273	-1.34831		14743	b0606	-0.178838	-0.913822		14743	b0606	-0.334275	-1.431			14743	b0606	-0.063505	-0.303227		14743	b0606	-0.193371	-0.929233		14743	b0606	-0.236871	-0.969547
14744	b0607	-0.138499	-0.945315		14744	b0607	-0.119324	-0.79511		14744	b0607	-0.122283	-0.841533			14744	b0607	-0.172498	-1.15632		14744	b0607	-0.22584	-1.48289		14744	b0607	-0.221181	-1.33289			14744	b0607	-0.284083	-1.85379		14744	b0607	-0.0811553	-0.558646		14744	b0607	-0.144311	-0.995641
14745	b0608	0.31457	1.79762		14745	b0608	0.367329	1.95154		14745	b0608	0.406546	2.01289			14745	b0608	0.335018	1.91507		14745	b0608	0.361335	1.9671		14745	b0608	0.326888	1.73283			14745	b0608	0.216255	0.944351		14745	b0608	0.432586	2.39752		14745	b0608	0.343263	1.77604
14747	b0610	0.716287	1.41975		14747	b0610	0.785823	1.31959		14747	b0610	0.85537	1.51115			14747	b0610	0.873425	1.95649		14747	b0610	0.907845	1.46355		14747	b0610	0.76132	1.53415			14747	b0610	0.558795	1.5653		14747	b0610	0.765642	1.47852		14747	b0610	0.822979	1.84751
14748	b0611	0.127629	0.468297		14748	b0611	-0.120017	-0.421799		14748	b0611	-0.188821	-0.535708			14748	b0611	0.070287	0.23263		14748	b0611	0.0366886	0.135333		14748	b0611	0.0117104	0.0458835			14748	b0611	0.150591	0.410136		14748	b0611	-0.314097	-1.07797		14748	b0611	-0.0299715	-0.124136
14749	b0612	-0.0841823	-0.458984		14749	b0612	0.0370075	0.196845		14749	b0612	-0.028066	-0.144609			14749	b0612	-0.0125118	-0.068823		14749	b0612	-0.084797	-0.435959		14749	b0612	-0.144427	-0.801566			14749	b0612	-0.115647	-0.585339		14749	b0612	-0.0095911	-0.0532884		14749	b0612	-0.0413213	-0.225912
14750	b0613	0.293769	1.02053		14750	b0613	0.248181	0.864705		14750	b0613	0.375176	1.08105			14750	b0613	0.3181	0.994207		14750	b0613	0.308651	0.9899		14750	b0613	0.265142	0.828697			14750	b0613	0.221182	0.604802		14750	b0613	0.353436	1.18217		14750	b0613	0.375996	1.14344
14752	b0615	0.0206875	0.0855169		14752	b0615	-0.0113165	-0.0479615		14752	b0615	-0.00266293	-0.0115587			14752	b0615	-0.150192	-0.76439		14752	b0615	-0.0588965	-0.233566		14752	b0615	-0.16817	-0.684615			14752	b0615	-0.0169983	-0.0823724		14752	b0615	-0.0085582	-0.0369791		14752	b0615	-0.0291433	-0.134673
14753	b0616	0.00766098	0.0360386		14753	b0616	-0.0317445	-0.139269		14753	b0616	0.0828896	0.376074			14753	b0616	-0.0153496	-0.0572734		14753	b0616	-0.0332863	-0.117848		14753	b0616	-0.149053	-0.610584			14753	b0616	-0.176818	-0.644031		14753	b0616	-0.169951	-0.626059		14753	b0616	-0.0467174	-0.164593
14755	b0618	-0.203221	-0.97127		14755	b0618	-0.154116	-0.767404		14755	b0618	-0.22917	-1.11778			14755	b0618	-0.175037	-0.871619		14755	b0618	-0.205291	-1.06364		14755	b0618	-0.242575	-1.16496			14755	b0618	-0.255705	-1.24161		14755	b0618	-0.126846	-0.627532		14755	b0618	-0.293381	-1.46878
14756	b0619	-1.20735	-6.42416		14756	b0619	-1.24455	-5.8675		14756	b0619	-1.13672	-5.66494			14756	b0619	-1.06345	-5.21874		14756	b0619	-1.21723	-5.79622		14756	b0619	-1.1513	-5.8619			14756	b0619	-1.11309	-5.95515		14756	b0619	-1.04779	-5.19853		14756	b0619	-0.962632	-5.17377
14757	b0620	0.283	1.8571		14757	b0620	0.371457	2.51035		14757	b0620	0.413498	2.55751			14757	b0620	0.361339	2.44283		14757	b0620	0.272155	1.7065		14757	b0620	0.314065	1.99065			14757	b0620	0.251907	1.6562		14757	b0620	0.311773	2.01274		14757	b0620	0.283989	1.81503
14758	b0621	0.205113	1.29272		14758	b0621	0.250125	1.40496		14758	b0621	0.352767	2.25067			14758	b0621	0.256781	1.5888		14758	b0621	0.379663	2.33581		14758	b0621	0.258035	1.65347			14758	b0621	0.117328	0.589433		14758	b0621	0.187131	1.12468		14758	b0621	0.150169	0.952672
14759	b0622	-0.156513	-0.849302		14759	b0622	-0.020473	-0.118894		14759	b0622	-0.00385216	-0.0200589			14759	b0622	-0.0109203	-0.0603122		14759	b0622	-0.182567	-1.01057		14759	b0622	-0.138162	-0.672115			14759	b0622	-0.262997	-1.28801		14759	b0622	-0.0324747	-0.171523		14759	b0622	-0.0577604	-0.287344
14761	b0624	0.083528	0.259531		14761	b0624	0.249538	0.754203		14761	b0624	0.392305	1.20512			14761	b0624	0.301424	1.1081		14761	b0624	0.0929511	0.256079		14761	b0624	0.213151	0.670748			14761	b0624	0.0730645	0.21095		14761	b0624	0.311245	0.81394		14761	b0624	0.426485	1.44858
14766	b0629	0.0516053	0.348729		14766	b0629	-0.000512205	-0.00353101		14766	b0629	0.0878024	0.612801			14766	b0629	-0.0100668	-0.0682705		14766	b0629	-0.00130361	-0.0082457		14766	b0629	0.0543335	0.390761			14766	b0629	0.0322078	0.204197		14766	b0629	0.0307659	0.210331		14766	b0629	-0.0238728	-0.168228
14769	b0632	-0.306206	-1.53765		14769	b0632	-0.773254	-3.64875		14769	b0632	-0.735244	-3.62092			14769	b0632	-0.381534	-1.81945		14769	b0632	-0.687179	-3.13947		14769	b0632	-0.892553	-4.41007			14769	b0632	-0.421508	-1.71736		14769	b0632	-0.479351	-2.31209		14769	b0632	-0.468514	-2.35351
14770	b0633	-0.00701859	-0.0395248		14770	b0633	0.010253	0.0563866		14770	b0633	0.079054	0.457289			14770	b0633	-0.0937014	-0.556834		14770	b0633	0.0570196	0.322376		14770	b0633	-0.0813909	-0.441645			14770	b0633	-0.0275188	-0.148387		14770	b0633	-0.0949267	-0.544855		14770	b0633	0.0639533	0.334444
14773	b0636	0.381747	1.79151		14773	b0636	0.434424	2.38227		14773	b0636	0.500974	2.5999			14773	b0636	0.338937	1.57887		14773	b0636	0.238717	1.39752		14773	b0636	0.387053	1.81882			14773	b0636	0.234354	1.216		14773	b0636	0.35961	1.80279		14773	b0636	0.301125	1.31036
14775	b0638	0.210157	0.938065		14775	b0638	0.33356	1.7058		14775	b0638	0.231221	1.13972			14775	b0638	0.172699	0.823008		14775	b0638	0.271577	1.3425		14775	b0638	0.262177	1.35007			14775	b0638	0.213038	1.10835		14775	b0638	0.0878218	0.400678		14775	b0638	0.167794	0.791647
14778	b0641	0.239154	0.6599		14778	b0641	0.311937	0.866814		14778	b0641	0.355806	0.961875			14778	b0641	0.32829	0.914603		14778	b0641	0.116561	0.318506		14778	b0641	0.236263	0.630411			14778	b0641	0.461009	1.22792		14778	b0641	0.415032	1.18057		14778	b0641	0.182023	0.501676
14780	b0643	-0.226968	-1.26382		14780	b0643	-0.222101	-0.835182		14780	b0643	-0.172308	-0.908741			14780	b0643	-0.260047	-1.1816		14780	b0643	-0.393403	-2.10408		14780	b0643	-0.172794	-0.772404			14780	b0643	-0.246798	-1.24224		14780	b0643	-0.401136	-2.31101		14780	b0643	-0.246043	-1.02499
14781	b0644	0.0216361	0.115584		14781	b0644	0.00830795	0.0447313		14781	b0644	-0.0629396	-0.366089			14781	b0644	0.0140075	0.0891692		14781	b0644	-0.130956	-0.748257		14781	b0644	-0.0778942	-0.452261			14781	b0644	-0.118114	-0.582067		14781	b0644	0.0642209	0.359178		14781	b0644	-0.0167652	-0.0917549
14782	b0645	-0.338796	-1.19609		14782	b0645	-0.156345	-0.648042		14782	b0645	-0.412435	-1.36449			14782	b0645	-0.184031	-0.610919		14782	b0645	-0.358118	-1.2992		14782	b0645	-0.384611	-1.36932			14782	b0645	-0.523313	-2.05956		14782	b0645	-0.499767	-1.76886		14782	b0645	-0.337054	-1.06312
14783	b0646	-0.0564873	-0.424657		14783	b0646	-0.0276788	-0.202886		14783	b0646	-0.0634784	-0.462088			14783	b0646	-0.068042	-0.499428		14783	b0646	-0.0127843	-0.0960876		14783	b0646	-0.0379255	-0.285083			14783	b0646	0.00321455	0.0230699		14783	b0646	-0.0778504	-0.596582		14783	b0646	-0.0537535	-0.403755
14784	b0647	-0.540062	-1.71979		14784	b0647	-0.438569	-1.45263		14784	b0647	-0.508211	-1.88079			14784	b0647	-0.645669	-2.13112		14784	b0647	-0.575198	-1.91367		14784	b0647	-0.661121	-2.21694			14784	b0647	-0.692862	-2.03528		14784	b0647	-0.552702	-1.74888		14784	b0647	-0.633552	-1.87512
14785	b0648	-0.55695	-2.13075		14785	b0648	-0.441089	-1.7382		14785	b0648	-0.385211	-1.59458			14785	b0648	-0.548505	-2.27759		14785	b0648	-0.582292	-2.37078		14785	b0648	-0.513258	-2.08541			14785	b0648	-0.525107	-2.03202		14785	b0648	-0.594511	-2.39712		14785	b0648	-0.481728	-1.84968
14786	b0649	-0.158007	-0.702103		14786	b0649	-0.0142705	-0.0708533		14786	b0649	-0.22532	-0.986489			14786	b0649	-0.0103352	-0.0539406		14786	b0649	-0.18093	-0.783032		14786	b0649	-0.150937	-0.686812			14786	b0649	-0.324008	-1.3725		14786	b0649	-0.151459	-0.736422		14786	b0649	-0.0346613	-0.166456
14787	b0650	-0.183366	-1.25925		14787	b0650	-0.0375974	-0.250542		14787	b0650	-0.260728	-1.74361			14787	b0650	-0.233396	-1.46799		14787	b0650	-0.302549	-1.90973		14787	b0650	-0.157325	-1.0161			14787	b0650	-0.284905	-1.77977		14787	b0650	-0.144102	-1.00158		14787	b0650	-0.142757	-0.951627
14788	b0651	-0.00630298	-0.0418554		14788	b0651	-0.0406234	-0.246621		14788	b0651	0.00357499	0.022024			14788	b0651	0.0108759	0.0688381		14788	b0651	-0.0347071	-0.229543		14788	b0651	0.00658034	0.0421027			14788	b0651	-0.118607	-0.789715		14788	b0651	-0.0773151	-0.496438		14788	b0651	-0.0886523	-0.561448
14789	b0652	0.017547	0.0678061		14789	b0652	-0.0737778	-0.341717		14789	b0652	0.0380218	0.145567			14789	b0652	0.0615359	0.244938		14789	b0652	0.164069	0.617494		14789	b0652	0.000791457	0.00329387			14789	b0652	-0.160775	-0.704538		14789	b0652	0.17874	0.887838		14789	b0652	0.103176	0.4293
14790	b0653	0.124968	0.560053		14790	b0653	0.070125	0.325496		14790	b0653	0.0406411	0.193842			14790	b0653	0.0201204	0.103245		14790	b0653	0.0930835	0.41732		14790	b0653	0.10327	0.513455			14790	b0653	0.0851281	0.363138		14790	b0653	0.102327	0.482485		14790	b0653	-0.0374777	-0.189568
14791	b0654	-0.0475631	-0.280015		14791	b0654	-0.039888	-0.216924		14791	b0654	-0.0906922	-0.547532			14791	b0654	-0.0894417	-0.50315		14791	b0654	-0.0224984	-0.121654		14791	b0654	-0.129756	-0.668437			14791	b0654	-0.159585	-0.836452		14791	b0654	-0.154393	-0.74182		14791	b0654	-0.14814	-0.842771
14792	b0655	-0.0886374	-0.32822		14792	b0655	-0.217639	-0.739796		14792	b0655	-0.0881808	-0.255405			14792	b0655	-0.108747	-0.43035		14792	b0655	-0.0522369	-0.208026		14792	b0655	-0.0335007	-0.114025			14792	b0655	-0.212922	-0.674996		14792	b0655	-0.227594	-0.783456		14792	b0655	-0.219015	-0.972417
14797	b0660	-0.600392	-2.19501		14797	b0660	-0.473827	-2.04971		14797	b0660	-0.739139	-2.85917			14797	b0660	-0.54094	-2.4145		14797	b0660	-0.592898	-2.82376		14797	b0660	-0.517346	-1.92881			14797	b0660	-0.609536	-1.88578		14797	b0660	-0.649971	-2.30155		14797	b0660	-0.63756	-2.52464
14798	b0661	0.0318693	0.201124		14798	b0661	-0.0194302	-0.119848		14798	b0661	0.00228338	0.0140368			14798	b0661	0.0753901	0.494124		14798	b0661	-0.0139243	-0.0820922		14798	b0661	0.0217044	0.135595			14798	b0661	-0.0489429	-0.278144		14798	b0661	0.108471	0.671691		14798	b0661	-0.0138215	-0.0845641
14804	b0674	-0.104666	-0.596577		14804	b0674	-0.150556	-0.929936		14804	b0674	-0.151158	-0.877213			14804	b0674	-0.132402	-0.787983		14804	b0674	-0.253078	-1.41094		14804	b0674	-0.280954	-1.63562			14804	b0674	-0.0713736	-0.409207		14804	b0674	-0.205899	-1.23299		14804	b0674	-0.436013	-2.53063
14805	b0675	0.174187	0.624124		14805	b0675	0.34755	1.43995		14805	b0675	0.312742	1.37578			14805	b0675	0.327956	1.40042		14805	b0675	0.081084	0.250377		14805	b0675	0.358578	1.26544			14805	b0675	0.213501	0.918566		14805	b0675	0.2958	1.00983		14805	b0675	0.2911	1.03532
14806	b0676	-0.497812	-2.56563		14806	b0676	-0.59398	-2.83867		14806	b0676	-0.715065	-3.11876			14806	b0676	-0.39853	-2.21992		14806	b0676	-0.438637	-2.07051		14806	b0676	-0.575058	-3.03752			14806	b0676	-0.547188	-2.44395		14806	b0676	-0.517627	-2.51188		14806	b0676	-0.661292	-3.02989
14807	b0677	-0.48808	-1.20799		14807	b0677	-0.589927	-1.55572		14807	b0677	-0.876036	-2.26405			14807	b0677	-0.615268	-1.73141		14807	b0677	-0.789391	-1.95467		14807	b0677	-0.556893	-1.61986			14807	b0677	-0.732093	-1.8717		14807	b0677	-0.554425	-1.51363		14807	b0677	-0.853032	-2.52867
14808	b0678	0.0752648	0.267767		14808	b0678	0.109891	0.360724		14808	b0678	-0.0525628	-0.155997			14808	b0678	-0.0635052	-0.201716		14808	b0678	-0.0770447	-0.267775		14808	b0678	-0.0795369	-0.27405			14808	b0678	-0.224352	-0.709405		14808	b0678	-0.121457	-0.381789		14808	b0678	-0.115096	-0.355697
14809	b0679	-0.096466	-0.626721		14809	b0679	0.0643427	0.432225		14809	b0679	-0.123534	-0.818402			14809	b0679	-0.0383175	-0.270275		14809	b0679	-0.019189	-0.136326		14809	b0679	-0.0149277	-0.103194			14809	b0679	-0.0850916	-0.545747		14809	b0679	-0.0504447	-0.354835		14809	b0679	0.00353967	0.0241145
14811	b0681	-0.300359	-1.68694		14811	b0681	-0.210429	-1.32031		14811	b0681	-0.232534	-1.52362			14811	b0681	-0.214234	-1.37649		14811	b0681	-0.256168	-1.42774		14811	b0681	-0.254603	-1.61387			14811	b0681	-0.38608	-2.49489		14811	b0681	-0.261622	-1.6068		14811	b0681	-0.180434	-1.08197
14812	b0682	-0.0950752	-0.291796		14812	b0682	-0.0447079	-0.160077		14812	b0682	-0.00693774	-0.0216183			14812	b0682	-0.0516743	-0.178005		14812	b0682	-0.0507519	-0.165461		14812	b0682	0.115587	0.434379			14812	b0682	-0.322869	-1.3962		14812	b0682	-0.0360191	-0.109557		14812	b0682	0.114333	0.433183
14815	b0685	0.166798	0.529481		14815	b0685	-0.106625	-0.311537		14815	b0685	0.112526	0.368696			14815	b0685	0.0724333	0.243102		14815	b0685	0.204199	0.657752		14815	b0685	0.14061	0.409754			14815	b0685	0.0268265	0.0867997		14815	b0685	0.217238	0.607087		14815	b0685	0.0299002	0.0871403
14816	b0686	0.314534	1.18996		14816	b0686	0.262862	0.955488		14816	b0686	0.236027	0.961915			14816	b0686	0.404724	1.61101		14816	b0686	0.316575	1.27317		14816	b0686	0.340286	1.30939			14816	b0686	0.330724	1.32066		14816	b0686	0.350921	1.35317		14816	b0686	0.423927	1.71099
14819	b0689	0.293344	1.8845		14819	b0689	0.241236	1.42037		14819	b0689	0.22341	1.25761			14819	b0689	0.240793	1.44195		14819	b0689	0.252416	1.48087		14819	b0689	0.286504	1.76252			14819	b0689	0.0699216	0.392768		14819	b0689	0.307046	1.90212		14819	b0689	0.222695	1.40231
14821	b0691	-0.223902	-1.26359		14821	b0691	-0.212029	-1.13611		14821	b0691	-0.342169	-1.83133			14821	b0691	-0.285374	-1.61648		14821	b0691	-0.255439	-1.54351		14821	b0691	-0.362093	-1.98484			14821	b0691	-0.466142	-2.36089		14821	b0691	-0.254592	-1.42897		14821	b0691	-0.207049	-1.14701
14823	b0692	0.508803	3.28988		14823	b0692	0.600658	3.68702		14823	b0692	0.56021	3.53188			14823	b0692	0.503852	3.11263		14823	b0692	0.563463	3.17976		14823	b0692	0.641074	4.03072			14823	b0692	0.470573	2.64447		14823	b0692	0.528519	2.9817		14823	b0692	0.47946	2.73609
14824	b0693	-0.335214	-2.09166		14824	b0693	-0.374554	-2.20483		14824	b0693	-0.326679	-1.98002			14824	b0693	-0.269415	-1.60598		14824	b0693	-0.261293	-1.61687		14824	b0693	-0.352514	-2.13948			14824	b0693	-0.338356	-2.04518		14824	b0693	-0.30191	-1.78475		14824	b0693	-0.308574	-1.78676
14826	b0694	0.329792	1.29037		14826	b0694	0.370106	1.55414		14826	b0694	0.256185	1.11944			14826	b0694	0.292791	1.0516		14826	b0694	0.287974	1.20674		14826	b0694	0.44524	1.65723			14826	b0694	0.291422	1.23108		14826	b0694	0.384795	1.63373		14826	b0694	0.374724	1.62588
14827	b0695	0.210455	1.38146		14827	b0695	0.385554	2.14441		14827	b0695	0.409972	2.36534			14827	b0695	0.245092	1.62327		14827	b0695	0.173674	1.12305		14827	b0695	0.21724	1.46253			14827	b0695	0.190584	1.30532		14827	b0695	0.363277	2.25698		14827	b0695	0.23684	1.48538
14828	b0696	-0.46247	-1.97313		14828	b0696	-0.579962	-2.17987		14828	b0696	-0.558717	-1.72321			14828	b0696	-0.461086	-1.71132		14828	b0696	-0.938698	-3.07321		14828	b0696	-0.533827	-2.09086			14828	b0696	-0.599547	-2.082		14828	b0696	-0.588616	-2.6287		14828	b0696	-0.602183	-2.37618
14829	b0697	-0.0523937	-0.323036		14829	b0697	-0.131276	-0.771842		14829	b0697	-0.0818782	-0.520456			14829	b0697	-0.0192906	-0.13053		14829	b0697	-0.051627	-0.3073		14829	b0697	0.0247829	0.147901			14829	b0697	-0.244522	-1.36418		14829	b0697	-0.103602	-0.610199		14829	b0697	0.0181849	0.109144
14830	b0698	0.151303	0.833337		14830	b0698	0.193691	1.05646		14830	b0698	0.133684	0.713252			14830	b0698	0.142415	0.74806		14830	b0698	0.151973	0.763984		14830	b0698	0.175433	0.930571			14830	b0698	0.00588347	0.0287068		14830	b0698	0.257012	1.41291		14830	b0698	0.269988	1.41287
14833	b0700	0.0693999	0.398562		14833	b0700	0.102503	0.534803		14833	b0700	0.0575064	0.334154			14833	b0700	0.187469	1.02555		14833	b0700	0.159237	0.798008		14833	b0700	0.124702	0.69784			14833	b0700	0.0206335	0.0969614		14833	b0700	0.14418	0.804731		14833	b0700	0.199288	1.09472
14835	b0703	-0.0446359	-0.311745		14835	b0703	-0.00918781	-0.0643299		14835	b0703	0.00981651	0.0687329			14835	b0703	0.0211212	0.149481		14835	b0703	0.0588306	0.415186		14835	b0703	-0.0364652	-0.255902			14835	b0703	-0.109197	-0.734121		14835	b0703	-0.0431377	-0.297442		14835	b0703	0.0440709	0.307535
14839	b0707	0.406662	0.865783		14839	b0707	0.129514	0.438174		14839	b0707	0.276804	0.678878			14839	b0707	0.353046	0.746934		14839	b0707	0.322968	0.651078		14839	b0707	0.495727	1.16901			14839	b0707	0.323487	0.743928		14839	b0707	0.36636	0.964523		14839	b0707	0.0417008	0.153882
14840	b0708	-0.181555	-0.939308		14840	b0708	-0.196861	-0.898013		14840	b0708	-0.11328	-0.482121			14840	b0708	-0.101683	-0.495476		14840	b0708	0.00253209	0.0114583		14840	b0708	-0.0287432	-0.140154			14840	b0708	-0.354526	-1.65241		14840	b0708	-0.192855	-0.932412		14840	b0708	-0.0294032	-0.12791
14841	b0709	0.0265189	0.199501		14841	b0709	0.229989	1.64823		14841	b0709	0.113113	0.816113			14841	b0709	0.126428	0.92917		14841	b0709	0.125071	0.891677		14841	b0709	0.185453	1.30464			14841	b0709	0.0838569	0.568298		14841	b0709	0.148683	1.08136		14841	b0709	0.169087	1.29113
14842	b0710	0.0505713	0.171196		14842	b0710	-0.265372	-0.732531		14842	b0710	-0.128893	-0.373685			14842	b0710	-0.0555021	-0.200277		14842	b0710	-0.00443955	-0.0157152		14842	b0710	-0.182577	-0.600966			14842	b0710	0.151476	0.44071		14842	b0710	-0.0918502	-0.292742		14842	b0710	-0.121701	-0.369336
14843	b0711	0.404345	2.04747		14843	b0711	0.497313	2.49476		14843	b0711	0.475901	2.03901			14843	b0711	0.44008	1.75418		14843	b0711	0.144583	0.638089		14843	b0711	0.333926	1.47713			14843	b0711	0.385261	1.58935		14843	b0711	0.443679	2.18693		14843	b0711	0.491966	2.23895
14844	b0712	-0.242128	-1.23075		14844	b0712	-0.294433	-1.45997		14844	b0712	-0.14786	-0.637896			14844	b0712	-0.151632	-0.690811		14844	b0712	-0.3638	-1.52052		14844	b0712	-0.155766	-0.69292			14844	b0712	-0.327602	-1.64332		14844	b0712	-0.180202	-0.787897		14844	b0712	-0.0513209	-0.241574
14845	b0713	0.21993	0.987185		14845	b0713	0.152405	0.574845		14845	b0713	0.171397	0.633162			14845	b0713	0.152241	0.589059		14845	b0713	0.0517367	0.160734		14845	b0713	0.25747	1.11088			14845	b0713	0.0648394	0.246821		14845	b0713	0.202227	0.818153		14845	b0713	0.230713	0.864835
14846	b0714	-0.326523	-1.54898		14846	b0714	-0.320682	-1.31424		14846	b0714	-0.157592	-0.703774			14846	b0714	-0.10037	-0.347807		14846	b0714	-0.306746	-1.14969		14846	b0714	-0.270381	-1.23234			14846	b0714	-0.11755	-0.548052		14846	b0714	-0.209468	-0.742025		14846	b0714	-0.203959	-0.718468
14847	b0715	0.162284	0.627437		14847	b0715	0.0776949	0.300097		14847	b0715	0.0937089	0.374806			14847	b0715	0.214682	0.950086		14847	b0715	0.0131409	0.0536026		14847	b0715	0.182362	0.718796			14847	b0715	0.177756	0.715107		14847	b0715	0.181307	0.698878		14847	b0715	0.16867	0.657511
14848	b0716	0.00901299	0.0582155		14848	b0716	0.0345781	0.23534		14848	b0716	0.102959	0.718315			14848	b0716	0.0972502	0.653063		14848	b0716	0.0451422	0.307442		14848	b0716	0.0559866	0.393256			14848	b0716	-0.0900531	-0.577284		14848	b0716	0.00409995	0.0277651		14848	b0716	-0.0209544	-0.1381
14849	b0717	0.0078456	0.0335631		14849	b0717	-0.0461943	-0.203561		14849	b0717	0.125712	0.612791			14849	b0717	0.190049	1.00097		14849	b0717	0.00259158	0.00887705		14849	b0717	-0.00811769	-0.0376947			14849	b0717	-0.214744	-0.911234		14849	b0717	-0.0675596	-0.239291		14849	b0717	-0.0666019	-0.273
14850	b0718	-0.0763105	-0.573411		14850	b0718	-0.116642	-0.859546		14850	b0718	-0.126993	-0.970412			14850	b0718	-0.0863749	-0.650258		14850	b0718	-0.11241	-0.834189		14850	b0718	-0.0556785	-0.420612			14850	b0718	-0.167605	-1.18499		14850	b0718	-0.125952	-0.960048		14850	b0718	-0.0485009	-0.366868
14851	b0719	0.0816378	0.557536		14851	b0719	0.147523	1.035		14851	b0719	0.0826681	0.541602			14851	b0719	0.081701	0.547228		14851	b0719	0.127607	0.875168		14851	b0719	0.130683	0.906965			14851	b0719	-0.0122659	-0.0841118		14851	b0719	0.0404327	0.277624		14851	b0719	0.0854986	0.558608
14852	b0720	-0.548108	-2.14736		14852	b0720	-0.320213	-1.35752		14852	b0720	-0.436764	-1.85284			14852	b0720	-0.450715	-1.81724		14852	b0720	-0.619016	-2.4557		14852	b0720	-0.799845	-3.18391			14852	b0720	-0.37957	-1.47759		14852	b0720	-0.603281	-2.45924		14852	b0720	-0.608931	-2.42909
14853	b0721	-0.470962	-1.5963		14853	b0721	-0.291766	-0.967207		14853	b0721	-0.4784	-1.59618			14853	b0721	-0.536843	-1.64631		14853	b0721	-0.131098	-0.47565		14853	b0721	-0.596277	-2.01654			14853	b0721	-0.680847	-1.88692		14853	b0721	-0.418523	-1.58525		14853	b0721	-0.450457	-1.68664
14855	b0723	-0.560861	-3.36121		14855	b0723	-0.52853	-2.70599		14855	b0723	-0.583776	-3.12303			14855	b0723	-0.545511	-3.1478		14855	b0723	-0.352015	-1.87127		14855	b0723	-0.671439	-3.96459			14855	b0723	-0.639819	-3.1939		14855	b0723	-0.742728	-4.24488		14855	b0723	-0.66591	-4.1422
14856	b0724	-0.539778	-2.26916		14856	b0724	-0.433314	-1.49012		14856	b0724	-0.65895	-2.73967			14856	b0724	-0.579958	-2.34295		14856	b0724	-0.401594	-1.43643		14856	b0724	-0.371314	-1.45399			14856	b0724	-0.605658	-2.14187		14856	b0724	-0.357669	-1.54155		14856	b0724	-0.654147	-2.36158
14860	b0728	-0.112653	-0.50224		14860	b0728	-0.232231	-0.948869		14860	b0728	-0.295562	-1.25196			14860	b0728	-0.26665	-1.33586		14860	b0728	-0.250796	-1.01586		14860	b0728	-0.126922	-0.498636			14860	b0728	-0.460319	-1.8028		14860	b0728	-0.204456	-0.836641		14860	b0728	-0.158676	-0.637168
14861	b0729	-0.944315	-2.64772		14861	b0729	-0.459609	-1.24785		14861	b0729	-0.82007	-2.05889			14861	b0729	-0.699508	-2.53064		14861	b0729	-0.673545	-1.95553		14861	b0729	-0.79416	-2.54173			14861	b0729	-0.734752	-2.42724		14861	b0729	-0.451537	-1.35238		14861	b0729	-0.833731	-2.29972
14863	b0731	0.084171	0.50458		14863	b0731	0.0133626	0.0800726		14863	b0731	0.043581	0.260199			14863	b0731	-0.0116144	-0.073448		14863	b0731	0.101423	0.6122		14863	b0731	0.0865756	0.545515			14863	b0731	0.00173902	0.0116431		14863	b0731	0.0749004	0.410987		14863	b0731	0.0739907	0.406925
14864	b0732	0.108789	0.899241		14864	b0732	0.144956	1.22128		14864	b0732	0.134676	1.11859			14864	b0732	0.118311	0.983768		14864	b0732	0.131523	1.08623		14864	b0732	0.190198	1.5632			14864	b0732	0.0659029	0.519434		14864	b0732	0.141267	1.17546		14864	b0732	0.199558	1.67667
14867	b0735	0.254201	1.31233		14867	b0735	0.550179	2.784		14867	b0735	0.425259	2.18349			14867	b0735	0.396819	1.75939		14867	b0735	0.40425	1.97125		14867	b0735	0.512667	2.72242			14867	b0735	0.411176	1.97136		14867	b0735	0.574837	2.96129		14867	b0735	0.498326	2.34262
14868	b0736	0.0970586	0.268733		14868	b0736	0.184712	0.508321		14868	b0736	0.228559	0.634349			14868	b0736	0.100782	0.274488		14868	b0736	0.342056	0.965315		14868	b0736	0.379578	1.05493			14868	b0736	-0.154492	-0.466297		14868	b0736	0.0394392	0.121535		14868	b0736	0.333228	0.9884
14874	b0742	-0.0262344	-0.134895		14874	b0742	0.0322827	0.190597		14874	b0742	0.0123538	0.0623032			14874	b0742	0.0369186	0.190116		14874	b0742	-0.00786353	-0.04422		14874	b0742	0.0482947	0.241994			14874	b0742	-0.290832	-1.28276		14874	b0742	0.0504041	0.30118		14874	b0742	0.127121	0.699143
14875	b0750	-0.147734	-0.847481		14875	b0750	-0.164047	-0.910914		14875	b0750	0.0168255	0.0823213			14875	b0750	-0.0386401	-0.193727		14875	b0750	-0.0758107	-0.379828		14875	b0750	-0.00194592	-0.00993116			14875	b0750	0.0493847	0.250689		14875	b0750	-0.0731393	-0.393002		14875	b0750	-0.0016881	-0.00878927
14876	b0751	0.0702144	0.333255		14876	b0751	-0.031934	-0.146062		14876	b0751	0.0124585	0.0596202			14876	b0751	0.131672	0.692936		14876	b0751	-0.045766	-0.199737		14876	b0751	0.0424733	0.215841			14876	b0751	0.0728075	0.316122		14876	b0751	-0.0385886	-0.184909		14876	b0751	0.149144	0.681086
14877	b0752	-0.190994	-0.709376		14877	b0752	-0.216931	-0.852359		14877	b0752	-0.164737	-0.670837			14877	b0752	-0.238055	-1.02622		14877	b0752	-0.174402	-0.732411		14877	b0752	-0.0617998	-0.266661			14877	b0752	-0.213321	-0.730351		14877	b0752	-0.206191	-1.0042		14877	b0752	-0.135443	-0.651365
14878	b0753	-0.369817	-1.23735		14878	b0753	-0.228586	-0.939246		14878	b0753	-0.513692	-2.11543			14878	b0753	-0.316923	-1.19191		14878	b0753	-0.273023	-1.07637		14878	b0753	-0.197899	-0.728085			14878	b0753	-0.249853	-0.934772		14878	b0753	-0.345339	-1.28861		14878	b0753	-0.161386	-0.5442
14879	b0754	-0.100912	-0.510715		14879	b0754	-0.154205	-0.71882		14879	b0754	-0.134517	-0.699865			14879	b0754	-0.078974	-0.357548		14879	b0754	0.0450983	0.221506		14879	b0754	-0.0758093	-0.391004			14879	b0754	0.0591186	0.283825		14879	b0754	-0.00826544	-0.0425932		14879	b0754	-0.0875388	-0.395707
14880	b0755	-0.137081	-0.720393		14880	b0755	-0.164357	-0.881381		14880	b0755	-0.136078	-0.700223			14880	b0755	-0.0310831	-0.196574		14880	b0755	-0.194874	-0.981721		14880	b0755	-0.211369	-1.18842			14880	b0755	-0.118036	-0.514829		14880	b0755	-0.191321	-1.0389		14880	b0755	-0.176949	-0.935595
14881	b0756	0.0604122	0.35541		14881	b0756	0.103803	0.501711		14881	b0756	0.0318694	0.165883			14881	b0756	0.175091	0.685847		14881	b0756	0.199542	0.886134		14881	b0756	0.00546022	0.0235388			14881	b0756	-0.105933	-0.489418		14881	b0756	0.0893283	0.421027		14881	b0756	0.221794	1.22989
14882	b0757	0.373583	1.99257		14882	b0757	0.345494	1.82638		14882	b0757	0.243353	1.27903			14882	b0757	0.322725	1.77921		14882	b0757	0.33652	1.5583		14882	b0757	0.470829	2.48946			14882	b0757	0.232348	1.19208		14882	b0757	0.41434	2.26865		14882	b0757	0.437683	2.40817
14883	b0758	-1.74677	-2.19457		14883	b0758	-1.96039	-2.91457		14883	b0758	-2.03583	-2.79494			14883	b0758	-1.62843	-2.81738		14883	b0758	-1.559	-2.32243		14883	b0758	-1.83466	-2.71835			14883	b0758	-1.9411	-2.70506		14883	b0758	-1.99505	-3.01916		14883	b0758	-1.97743	-2.66066
14884	b0759	-1.93242	-6.19529		14884	b0759	-2.03078	-7.16218		14884	b0759	-2.00475	-7.82605			14884	b0759	-2.07141	-7.52173		14884	b0759	-2.21629	-7.20605		14884	b0759	-1.87911	-6.24322			14884	b0759	-2.18701	-8.03857		14884	b0759	-2.25779	-8.71325		14884	b0759	-2.0562	-6.67612
14885	b0760	-0.16563	-0.951792		14885	b0760	-0.0974373	-0.536096		14885	b0760	-0.0650101	-0.349648			14885	b0760	-0.150451	-0.833554		14885	b0760	-0.117479	-0.560694		14885	b0760	-0.136481	-0.751476			14885	b0760	-0.228854	-1.16903		14885	b0760	-0.0951948	-0.542754		14885	b0760	-0.0842892	-0.489678
14886	b0761	-0.0121969	-0.0581016		14886	b0761	-0.0228763	-0.114702		14886	b0761	-0.0916918	-0.405507			14886	b0761	0.100994	0.511987		14886	b0761	0.0569057	0.24698		14886	b0761	0.121425	0.612452			14886	b0761	0.0209012	0.0934231		14886	b0761	0.0225767	0.105829		14886	b0761	0.142413	0.651155
14888	b0763	-0.274803	-1.37151		14888	b0763	-0.261976	-1.28269		14888	b0763	-0.175828	-0.875727			14888	b0763	-0.309044	-1.50108		14888	b0763	-0.348907	-1.50256		14888	b0763	-0.168095	-0.767334			14888	b0763	-0.148521	-0.657407		14888	b0763	-0.173422	-0.879917		14888	b0763	-0.307818	-1.38387
14889	b0764	-0.323496	-1.18033		14889	b0764	-0.290165	-1.17962		14889	b0764	-0.309156	-1.01855			14889	b0764	-0.237309	-1.03193		14889	b0764	-0.353648	-1.25114		14889	b0764	-0.172274	-0.672134			14889	b0764	-0.0426455	-0.179734		14889	b0764	-0.270266	-1.01028		14889	b0764	-0.255444	-0.984628
14890	b0765	0.101677	0.411821		14890	b0765	0.197259	0.700569		14890	b0765	0.243506	0.888684			14890	b0765	0.177566	0.689646		14890	b0765	0.321844	1.33599		14890	b0765	0.24257	0.975543			14890	b0765	0.21517	0.933389		14890	b0765	0.12677	0.483341		14890	b0765	0.146073	0.549067
14891	b0766	0.0286965	0.170154		14891	b0766	-0.0517606	-0.261266		14891	b0766	-0.0835256	-0.448201			14891	b0766	-0.109083	-0.577951		14891	b0766	-0.0330461	-0.162765		14891	b0766	0.000507656	0.00289108			14891	b0766	0.100567	0.400983		14891	b0766	-0.011038	-0.0620446		14891	b0766	-0.0177371	-0.108812
14893	b0768	-0.0474879	-0.208498		14893	b0768	-0.104182	-0.457479		14893	b0768	-0.0690821	-0.301612			14893	b0768	-0.0997576	-0.469116		14893	b0768	-0.0407234	-0.174203		14893	b0768	-0.0298387	-0.140398			14893	b0768	-0.11255	-0.433033		14893	b0768	-0.00734642	-0.037082		14893	b0768	0.0139928	0.0755101
14894	b0769	-0.121733	-0.66608		14894	b0769	-0.163333	-0.88662		14894	b0769	-0.109533	-0.575973			14894	b0769	-0.152418	-0.80271		14894	b0769	-0.239038	-1.15722		14894	b0769	-0.208651	-1.05888			14894	b0769	-0.154979	-0.83158		14894	b0769	-0.158338	-0.847754		14894	b0769	-0.144919	-0.782186
14895	b0770	-0.00585037	-0.0426128		14895	b0770	0.0842834	0.614685		14895	b0770	0.152122	1.13149			14895	b0770	-0.0247893	-0.190319		14895	b0770	-0.013341	-0.101158		14895	b0770	0.131553	1.0167			14895	b0770	0.0275929	0.198281		14895	b0770	0.0985091	0.7449		14895	b0770	0.121862	0.902288
14896	b0771	0.0405031	0.318495		14896	b0771	0.0154115	0.117957		14896	b0771	0.0225653	0.18317			14896	b0771	-0.0128374	-0.0985705		14896	b0771	-0.0448807	-0.336538		14896	b0771	0.0599525	0.466722			14896	b0771	-0.0186683	-0.135026		14896	b0771	0.0363191	0.28397		14896	b0771	0.0535027	0.42228
14897	b0772	0.12792	0.877561		14897	b0772	0.149425	1.04027		14897	b0772	0.0836045	0.548983			14897	b0772	0.156044	1.01935		14897	b0772	0.0882043	0.567674		14897	b0772	0.148552	0.918526			14897	b0772	0.104349	0.643061		14897	b0772	0.127005	0.79739		14897	b0772	0.103032	0.662249
14898	b0773	0.450254	1.88012		14898	b0773	0.359626	1.42745		14898	b0773	0.593933	2.57773			14898	b0773	0.17651	0.712631		14898	b0773	0.50122	2.04517		14898	b0773	0.528648	2.27481			14898	b0773	0.278716	1.04771		14898	b0773	0.596022	2.49023		14898	b0773	0.536537	1.86742
14899	b0774	-0.0756592	-0.238159		14899	b0774	0.0422202	0.137505		14899	b0774	-0.0487314	-0.16425			14899	b0774	0.206718	0.781275		14899	b0774	-0.0286773	-0.0991241		14899	b0774	0.0628136	0.228017			14899	b0774	-0.138949	-0.514269		14899	b0774	0.108469	0.406101		14899	b0774	0.116879	0.45627
14900	b0775	0.0220999	0.073555		14900	b0775	0.0441544	0.16794		14900	b0775	0.0542771	0.205381			14900	b0775	0.0197535	0.0722203		14900	b0775	-0.200504	-0.869446		14900	b0775	-0.0244311	-0.102544			14900	b0775	0.0848779	0.31383		14900	b0775	-0.0573794	-0.220916		14900	b0775	0.0723427	0.275604
14901	b0776	0.176738	1.16668		14901	b0776	0.145619	0.948926		14901	b0776	0.220663	1.36827			14901	b0776	0.250705	1.63409		14901	b0776	0.231208	1.4068		14901	b0776	0.31396	1.92462			14901	b0776	0.102688	0.580438		14901	b0776	0.241752	1.60748		14901	b0776	0.29472	1.82372
14902	b0777	0.0818752	0.334395		14902	b0777	0.0361436	0.14776		14902	b0777	-0.0361217	-0.139392			14902	b0777	-0.0142666	-0.0716626		14902	b0777	0.161958	0.650694		14902	b0777	0.14061	0.589547			14902	b0777	0.0703381	0.258778		14902	b0777	-0.0728696	-0.327644		14902	b0777	0.0639812	0.273076
14903	b0778	0.112105	0.350192		14903	b0778	0.265677	0.959213		14903	b0778	0.237831	0.761271			14903	b0778	0.173061	0.571337		14903	b0778	0.154287	0.563967		14903	b0778	0.245005	0.99654			14903	b0778	0.209095	0.650591		14903	b0778	0.224401	0.808301		14903	b0778	0.267745	0.939292
14904	b0779	0.000552602	0.00358946		14904	b0779	-0.0133554	-0.0841226		14904	b0779	0.0343872	0.221488			14904	b0779	-0.0447008	-0.271423		14904	b0779	-0.034198	-0.199468		14904	b0779	0.0806886	0.50734			14904	b0779	0.0279921	0.162206		14904	b0779	0.0697843	0.437421		14904	b0779	0.0573933	0.354529
14905	b0780	0.184551	0.747286		14905	b0780	0.0853788	0.425698		14905	b0780	0.249945	1.20441			14905	b0780	0.252689	1.11443		14905	b0780	0.159992	0.681813		14905	b0780	0.15817	0.822965			14905	b0780	0.0369293	0.159755		14905	b0780	0.227964	0.965324		14905	b0780	0.231941	0.935988
14906	b0781	0.166038	0.715008		14906	b0781	0.138308	0.62115		14906	b0781	0.273963	1.31167			14906	b0781	0.0549379	0.241806		14906	b0781	0.102801	0.470637		14906	b0781	0.315239	1.26621			14906	b0781	-0.0105583	-0.0441108		14906	b0781	0.209609	0.958758		14906	b0781	0.215987	0.955086
14908	b0783	-0.154511	-0.627026		14908	b0783	0.0719772	0.321627		14908	b0783	0.00673522	0.026927			14908	b0783	0.0352363	0.137774		14908	b0783	-0.0251168	-0.0909184		14908	b0783	0.125355	0.552971			14908	b0783	-0.0643605	-0.249799		14908	b0783	-0.167748	-0.767531		14908	b0783	-0.0448702	-0.214226
14909	b0784	0.19808	0.508499		14909	b0784	0.31871	0.663488		14909	b0784	0.256349	0.667885			14909	b0784	0.119754	0.339024		14909	b0784	0.371086	0.679189		14909	b0784	0.216444	0.578573			14909	b0784	0.065437	0.170575		14909	b0784	0.249813	0.63197		14909	b0784	0.520951	1.17
14910	b0785	0.479135	1.83239		14910	b0785	0.310503	1.10835		14910	b0785	0.341289	1.07089			14910	b0785	0.297882	1.2781		14910	b0785	0.385525	1.48742		14910	b0785	0.298986	1.0977			14910	b0785	0.242099	0.78884		14910	b0785	0.376497	1.48085		14910	b0785	0.376394	1.42259
14911	b0786	-0.000838943	-0.00548906		14911	b0786	-0.026176	-0.19388		14911	b0786	-0.0198255	-0.138778			14911	b0786	-0.0243676	-0.167787		14911	b0786	0.116826	0.818628		14911	b0786	-0.0019377	-0.0129594			14911	b0786	-0.0736696	-0.497116		14911	b0786	0.0294823	0.194791		14911	b0786	0.00447289	0.0305744
14913	b0788	0.0151188	0.0523888		14913	b0788	-0.0944524	-0.350975		14913	b0788	-0.162718	-0.588096			14913	b0788	-0.010795	-0.0401645		14913	b0788	-0.0704264	-0.271363		14913	b0788	-0.0702297	-0.294684			14913	b0788	-0.148689	-0.615807		14913	b0788	0.0825467	0.305326		14913	b0788	-0.147987	-0.545852
14914	b0789	-0.0570709	-0.209288		14914	b0789	0.0517676	0.200364		14914	b0789	-0.116505	-0.47415			14914	b0789	-0.0761347	-0.260576		14914	b0789	-0.0449166	-0.168229		14914	b0789	-0.0291255	-0.0898908			14914	b0789	-0.243942	-0.831311		14914	b0789	0.0138672	0.0468607		14914	b0789	-0.10902	-0.362954
14915	b0790	-0.102304	-0.409639		14915	b0790	-0.162073	-0.618572		14915	b0790	-0.105137	-0.426039			14915	b0790	-0.0470031	-0.181327		14915	b0790	0.0172912	0.0717169		14915	b0790	-0.0732957	-0.297305			14915	b0790	-0.0539262	-0.222682		14915	b0790	-0.00211164	-0.00987727		14915	b0790	0.0822772	0.311017
14916	b0791	0.121421	0.326042		14916	b0791	-0.268372	-0.555578		14916	b0791	-0.28112	-0.684446			14916	b0791	-0.506069	-0.893764		14916	b0791	0.0441014	0.105468		14916	b0791	-0.131941	-0.274573			14916	b0791	0.164338	0.407359		14916	b0791	-0.197893	-0.425254		14916	b0791	-0.0835654	-0.171887
14917	b0792	0.302492	1.50735		14917	b0792	0.115174	0.543516		14917	b0792	0.108048	0.500743			14917	b0792	0.100969	0.524066		14917	b0792	0.153153	0.526785		14917	b0792	0.0924647	0.397743			14917	b0792	0.163447	0.754186		14917	b0792	0.115446	0.487953		14917	b0792	0.199508	0.957068
14918	b0793	-0.0357314	-0.182721		14918	b0793	-0.153199	-0.788406		14918	b0793	-0.196164	-1.05014			14918	b0793	-0.280948	-1.54316		14918	b0793	-0.235763	-1.00838		14918	b0793	0.0125314	0.0664113			14918	b0793	-0.0750445	-0.355235		14918	b0793	-0.205564	-1.05137		14918	b0793	-0.120437	-0.657615
14919	b0794	0.015678	0.0755423		14919	b0794	0.0520807	0.271895		14919	b0794	0.0240478	0.111773			14919	b0794	-0.0389622	-0.180187		14919	b0794	0.0775087	0.367046		14919	b0794	0.0303104	0.153015			14919	b0794	0.126688	0.571538		14919	b0794	-0.0503482	-0.238169		14919	b0794	-0.0265135	-0.117623
14920	b0795	-0.00769572	-0.0418976		14920	b0795	-0.061084	-0.357033		14920	b0795	-0.0694484	-0.40386			14920	b0795	-0.0737279	-0.381364		14920	b0795	-0.047458	-0.300614		14920	b0795	0.0201389	0.112948			14920	b0795	-0.0662232	-0.336546		14920	b0795	-0.0307151	-0.172888		14920	b0795	0.0219437	0.119119
14921	b0796	0.146297	0.543196		14921	b0796	0.248961	1.02267		14921	b0796	0.148721	0.665188			14921	b0796	0.158305	0.703313		14921	b0796	0.00692944	0.0261683		14921	b0796	0.12887	0.546708			14921	b0796	0.112848	0.501209		14921	b0796	0.0393123	0.170879		14921	b0796	0.0314089	0.108007
14922	b0797	-0.219629	-1.02768		14922	b0797	-0.0259817	-0.132351		14922	b0797	-0.110246	-0.540702			14922	b0797	-0.120725	-0.57414		14922	b0797	-0.12266	-0.515999		14922	b0797	-0.168882	-0.864486			14922	b0797	-0.357816	-1.45116		14922	b0797	-0.173903	-0.934388		14922	b0797	-0.142514	-0.697764
14924	b0799	0.112499	0.575565		14924	b0799	0.178132	0.943714		14924	b0799	0.168456	0.896073			14924	b0799	0.168458	0.877761		14924	b0799	0.172296	0.885102		14924	b0799	0.12797	0.690454			14924	b0799	0.042577	0.230989		14924	b0799	0.186829	0.976148		14924	b0799	0.139562	0.750337
14925	b0800	0.0817811	0.352106		14925	b0800	0.108935	0.463573		14925	b0800	0.104942	0.417522			14925	b0800	0.111635	0.456117		14925	b0800	0.197489	0.786714		14925	b0800	0.24588	1.05679			14925	b0800	0.17825	0.832367		14925	b0800	0.117572	0.475997		14925	b0800	0.0264262	0.107065
14926	b0801	0.0832486	0.43803		14926	b0801	0.144589	0.827437		14926	b0801	0.119924	0.582288			14926	b0801	0.219251	1.20965		14926	b0801	0.224969	1.21031		14926	b0801	0.124733	0.624827			14926	b0801	-0.0108454	-0.0620176		14926	b0801	0.0839394	0.452406		14926	b0801	0.128672	0.640112
14927	b0802	0.0539355	0.148825		14927	b0802	-0.141744	-0.401328		14927	b0802	-0.57708	-1.86988			14927	b0802	-0.00654635	-0.0199165		14927	b0802	-0.294117	-0.64953		14927	b0802	0.00831397	0.0195774			14927	b0802	-0.100586	-0.264127		14927	b0802	-0.0374062	-0.101508		14927	b0802	0.147002	0.341362
14928	b0803	-0.236868	-0.858688		14928	b0803	-0.380498	-1.52547		14928	b0803	-0.210815	-0.703271			14928	b0803	-0.438524	-1.29475		14928	b0803	-0.452436	-1.93762		14928	b0803	-0.0243792	-0.109536			14928	b0803	-0.0927558	-0.267071		14928	b0803	-0.164944	-0.610496		14928	b0803	-0.27949	-0.994982
14929	b0804	0.0926644	0.456906		14929	b0804	-0.0552245	-0.295649		14929	b0804	0.0343814	0.180061			14929	b0804	-0.0243084	-0.121296		14929	b0804	0.0434632	0.222001		14929	b0804	0.174699	0.833037			14929	b0804	-0.0224143	-0.109134		14929	b0804	0.0873008	0.420563		14929	b0804	0.0143106	0.0647723
14930	b0805	0.0327286	0.19945		14930	b0805	-0.0260932	-0.162701		14930	b0805	0.0593951	0.388524			14930	b0805	-0.0109164	-0.0670505		14930	b0805	0.105975	0.6906		14930	b0805	0.0386411	0.245807			14930	b0805	0.0388246	0.239769		14930	b0805	0.0882358	0.567413		14930	b0805	0.0081909	0.0492347
14931	b0806	-0.0859611	-0.227666		14931	b0806	-0.190997	-0.519276		14931	b0806	0.194898	0.421392			14931	b0806	0.0923881	0.241894		14931	b0806	-0.0173242	-0.0377096		14931	b0806	0.0598118	0.152711			14931	b0806	0.00390187	0.0102164		14931	b0806	0.0187939	0.0568499		14931	b0806	0.00396044	0.00942682
14932	b0807	-0.107113	-0.568234		14932	b0807	-0.118687	-0.515786		14932	b0807	-0.130361	-0.633341			14932	b0807	-0.0146347	-0.0748396		14932	b0807	-0.206534	-0.911501		14932	b0807	-0.0476248	-0.257721			14932	b0807	-0.0872687	-0.410654		14932	b0807	-0.214424	-1.09664		14932	b0807	-0.0517273	-0.242621
14933	b0808	-0.111518	-0.648919		14933	b0808	-0.0526756	-0.339121		14933	b0808	-0.026979	-0.163275			14933	b0808	-0.0683214	-0.424141		14933	b0808	-0.0152869	-0.0834904		14933	b0808	-0.0218775	-0.113625			14933	b0808	-0.0572733	-0.323005		14933	b0808	-0.00232953	-0.013932		14933	b0808	-0.021562	-0.124866
14934	b0809	-0.0322363	-0.145848		14934	b0809	0.0882651	0.350406		14934	b0809	0.0307771	0.136958			14934	b0809	-0.06887	-0.293156		14934	b0809	0.0524887	0.199202		14934	b0809	0.0877887	0.350039			14934	b0809	0.0502362	0.217954		14934	b0809	0.0374498	0.156285		14934	b0809	-0.0608437	-0.217019
14935	b0810	-0.19794	-0.779525		14935	b0810	-0.0692904	-0.27941		14935	b0810	-0.132226	-0.605312			14935	b0810	-0.223635	-0.766251		14935	b0810	-0.124624	-0.458962		14935	b0810	-0.23441	-0.869141			14935	b0810	-0.239423	-0.775735		14935	b0810	-0.151555	-0.572245		14935	b0810	-0.340012	-1.32551
14936	b0811	0.232453	1.31357		14936	b0811	0.247112	1.38263		14936	b0811	0.267784	1.46906			14936	b0811	0.23228	1.1535		14936	b0811	0.11119	0.585061		14936	b0811	0.321999	1.80964			14936	b0811	0.124345	0.701444		14936	b0811	0.247463	1.33469		14936	b0811	0.143992	0.79421
14937	b0812	-0.0736143	-0.352083		14937	b0812	-0.0833138	-0.43274		14937	b0812	-0.0994535	-0.489608			14937	b0812	-0.137928	-0.699964		14937	b0812	0.0768778	0.387809		14937	b0812	-0.133035	-0.665156			14937	b0812	-0.372957	-1.62019		14937	b0812	-0.0261667	-0.128123		14937	b0812	-0.131785	-0.678704
14938	b0813	0.241564	1.46878		14938	b0813	0.253425	1.61845		14938	b0813	0.275453	1.83697			14938	b0813	0.284667	1.86382		14938	b0813	0.315233	2.11853		14938	b0813	0.278019	1.82659			14938	b0813	0.187497	1.18109		14938	b0813	0.286154	1.94756		14938	b0813	0.230856	1.52015
14939	b0814	-0.338469	-1.04119		14939	b0814	-0.359387	-1.07581		14939	b0814	-0.519399	-1.61561			14939	b0814	-0.3341	-1.25097		14939	b0814	-0.387966	-1.62795		14939	b0814	-0.294258	-0.978989			14939	b0814	-0.60749	-2.37518		14939	b0814	-0.374337	-1.47182		14939	b0814	-0.405403	-1.47553
14940	b0815	-0.00960597	-0.0527977		14940	b0815	-0.101574	-0.497602		14940	b0815	-0.0144011	-0.0742544			14940	b0815	-0.0276921	-0.155106		14940	b0815	-0.0350984	-0.189506		14940	b0815	-0.0261243	-0.145219			14940	b0815	-0.050337	-0.240604		14940	b0815	-0.0560716	-0.280539		14940	b0815	-0.0738567	-0.353104
14942	b0817	0.184141	0.659502		14942	b0817	0.344874	1.36753		14942	b0817	0.129456	0.544755			14942	b0817	0.104916	0.425818		14942	b0817	0.301156	1.20707		14942	b0817	0.0848155	0.299503			14942	b0817	0.0288193	0.114273		14942	b0817	0.0675213	0.255073		14942	b0817	0.0807698	0.344668
14943	b0818	-0.0120476	-0.0756306		14943	b0818	0.011383	0.0735072		14943	b0818	-0.0913774	-0.552448			14943	b0818	-0.119942	-0.80365		14943	b0818	-0.11008	-0.731825		14943	b0818	-0.0276505	-0.165743			14943	b0818	-0.129421	-0.812058		14943	b0818	-0.0250611	-0.178245		14943	b0818	0.00447289	0.0291366
14944	b0819	0.16994	0.916116		14944	b0819	0.00638546	0.0313327		14944	b0819	0.0983978	0.472189			14944	b0819	0.0961544	0.488186		14944	b0819	-0.0346879	-0.183134		14944	b0819	-0.0344182	-0.169322			14944	b0819	0.128041	0.660549		14944	b0819	0.0422388	0.197943		14944	b0819	-0.0109709	-0.0517612
14945	b0820	0.0204891	0.11843		14945	b0820	0.0301996	0.183155		14945	b0820	-0.0446074	-0.260105			14945	b0820	0.0494958	0.292233		14945	b0820	-0.0397818	-0.241071		14945	b0820	0.0278574	0.167531			14945	b0820	-0.0502546	-0.271519		14945	b0820	-0.0232562	-0.14114		14945	b0820	-0.0740226	-0.442162
14946	b0821	-0.28032	-1.4594		14946	b0821	-0.356858	-1.89727		14946	b0821	-0.324271	-1.53582			14946	b0821	-0.301847	-1.55803		14946	b0821	-0.320015	-1.61463		14946	b0821	-0.285462	-1.52961			14946	b0821	-0.266564	-1.61586		14946	b0821	-0.2126	-1.25827		14946	b0821	-0.202618	-1.22877
14947	b0822	-0.421699	-1.67833		14947	b0822	-0.180214	-0.827194		14947	b0822	-0.27381	-0.946721			14947	b0822	-0.350245	-1.43201		14947	b0822	-0.127984	-0.594278		14947	b0822	-0.356552	-1.39429			14947	b0822	-0.217242	-0.785279		14947	b0822	-0.225345	-0.905298		14947	b0822	-0.213748	-0.804016
14948	b0823	-0.00509473	-0.0355822		14948	b0823	-0.0172773	-0.10816		14948	b0823	0.0991404	0.665454			14948	b0823	-0.00487958	-0.032147		14948	b0823	0.0193994	0.123831		14948	b0823	0.0044402	0.0294724			14948	b0823	0.0481444	0.304966		14948	b0823	0.0343294	0.238231		14948	b0823	0.0762203	0.531234
14949	b0824	0.0905147	0.576467		14949	b0824	0.23892	1.59912		14949	b0824	0.0901415	0.525133			14949	b0824	0.0254601	0.163954		14949	b0824	0.115846	0.648957		14949	b0824	0.0968795	0.574726			14949	b0824	0.198659	1.00374		14949	b0824	0.197549	1.1853		14949	b0824	0.13386	0.726211
14950	b0825	0.461605	1.41512		14950	b0825	0.457335	2.25029		14950	b0825	0.303106	1.14258			14950	b0825	0.365496	1.61634		14950	b0825	0.503384	1.70471		14950	b0825	0.545427	1.78936			14950	b0825	0.418992	0.982896		14950	b0825	0.542791	2.16481		14950	b0825	0.46598	2.22351
14951	b0826	-0.226217	-1.10786		14951	b0826	-0.319687	-1.44696		14951	b0826	-0.152658	-0.822049			14951	b0826	-0.222425	-1.20161		14951	b0826	-0.0980229	-0.562919		14951	b0826	-0.20443	-1.04812			14951	b0826	-0.363414	-1.72076		14951	b0826	-0.200784	-1.14468		14951	b0826	-0.25906	-1.36973
14952	b0827	-0.39476	-1.4797		14952	b0827	-0.183653	-0.755094		14952	b0827	-0.363372	-1.60155			14952	b0827	-0.491968	-2.09536		14952	b0827	-0.338671	-1.35763		14952	b0827	-0.154387	-0.567986			14952	b0827	-0.529246	-1.62321		14952	b0827	-0.392154	-1.43124		14952	b0827	-0.327328	-1.29372
14953	b0828	0.43749	1.19298		14953	b0828	0.252241	0.718085		14953	b0828	0.337816	1.00976			14953	b0828	0.393733	1.43929		14953	b0828	0.253188	0.732402		14953	b0828	0.244851	0.63007			14953	b0828	0.232847	0.562258		14953	b0828	0.197002	0.470088		14953	b0828	0.272202	0.677908
14954	b0829	-0.100289	-0.484388		14954	b0829	-0.141319	-0.728156		14954	b0829	-0.145262	-0.759181			14954	b0829	-0.140513	-0.714168		14954	b0829	0.00473352	0.0229774		14954	b0829	-0.183764	-0.824659			14954	b0829	-0.253509	-1.12652		14954	b0829	-0.093598	-0.443146		14954	b0829	-0.230724	-1.1154
14955	b0830	-0.252205	-1.57175		14955	b0830	-0.240419	-1.62075		14955	b0830	-0.216903	-1.41876			14955	b0830	-0.12396	-0.74237		14955	b0830	-0.147505	-0.916516		14955	b0830	-0.150179	-0.993437			14955	b0830	-0.150756	-1.01231		14955	b0830	-0.144035	-0.900206		14955	b0830	-0.236547	-1.40725
14956	b0831	0.180042	0.692092		14956	b0831	0.339199	1.29977		14956	b0831	0.314953	1.14184			14956	b0831	0.0863998	0.31968		14956	b0831	0.264435	1.05249		14956	b0831	0.13929	0.555189			14956	b0831	0.113411	0.370974		14956	b0831	0.269547	1.20837		14956	b0831	0.251544	1.02113
14957	b0832	0.186153	1.16575		14957	b0832	0.230763	1.50394		14957	b0832	0.292561	1.93902			14957	b0832	0.218762	1.3944		14957	b0832	0.249729	1.61437		14957	b0832	0.236254	1.48755			14957	b0832	0.247541	1.50465		14957	b0832	0.255134	1.56419		14957	b0832	0.290342	1.87285
14958	b0833	-0.134614	-0.913907		14958	b0833	-0.0547491	-0.371174		14958	b0833	-0.124092	-0.795897			14958	b0833	-0.131699	-0.836818		14958	b0833	-0.0389627	-0.252144		14958	b0833	-0.0904783	-0.574303			14958	b0833	-0.0935948	-0.55561		14958	b0833	-0.105346	-0.696138		14958	b0833	-0.0467009	-0.304832
14959	b0834	-0.0868269	-0.382589		14959	b0834	-0.0755064	-0.327358		14959	b0834	-0.102174	-0.465209			14959	b0834	6.89552e-05	0.00033481		14959	b0834	-0.0640457	-0.280265		14959	b0834	-0.167364	-0.766551			14959	b0834	-0.240716	-1.03256		14959	b0834	-0.0586121	-0.26495		14959	b0834	-0.180417	-0.784816
14960	b0835	-0.326702	-1.59609		14960	b0835	-0.27687	-1.38946		14960	b0835	-0.292099	-1.60113			14960	b0835	-0.354716	-1.82015		14960	b0835	-0.328093	-1.74191		14960	b0835	-0.36698	-1.89622			14960	b0835	-0.493142	-2.5597		14960	b0835	-0.369829	-1.84597		14960	b0835	-0.334634	-1.74669
14962	b0837	0.233102	0.76269		14962	b0837	0.109672	0.320901		14962	b0837	0.167775	0.561363			14962	b0837	0.0548871	0.153157		14962	b0837	-0.00054203	-0.00132937		14962	b0837	0.0827444	0.261648			14962	b0837	0.103624	0.264606		14962	b0837	0.0546026	0.164394		14962	b0837	0.0843091	0.247725
14963	b0838	-0.10057	-0.640554		14963	b0838	-0.265705	-1.73878		14963	b0838	-0.219571	-1.25613			14963	b0838	-0.237547	-1.41318		14963	b0838	-0.151795	-0.854216		14963	b0838	-0.141883	-0.850136			14963	b0838	-0.250075	-1.58642		14963	b0838	-0.228925	-1.35982		14963	b0838	-0.23815	-1.38668
14964	b0839	-0.12482	-0.691917		14964	b0839	-0.148948	-0.845948		14964	b0839	-0.137182	-0.804982			14964	b0839	0.00531218	0.0347762		14964	b0839	-0.113689	-0.595724		14964	b0839	-0.108891	-0.577408			14964	b0839	-0.0770694	-0.399795		14964	b0839	0.0128908	0.0839126		14964	b0839	-0.0070664	-0.0431511
14965	b0840	-0.239686	-0.660425		14965	b0840	-0.468856	-1.70866		14965	b0840	-0.509348	-1.71145			14965	b0840	-0.528721	-1.79314		14965	b0840	-0.437253	-1.45375		14965	b0840	-0.554412	-1.5121			14965	b0840	-0.228151	-0.609518		14965	b0840	-0.543486	-1.59572		14965	b0840	-0.523872	-1.66839
14966	b0841	0.275677	0.927935		14966	b0841	0.382585	1.24788		14966	b0841	0.30937	0.905425			14966	b0841	0.197091	0.757873		14966	b0841	0.262861	0.787034		14966	b0841	0.255859	0.747515			14966	b0841	0.0205342	0.0621147		14966	b0841	0.284524	0.954653		14966	b0841	0.234733	0.710599
14967	b0842	0.127476	0.810691		14967	b0842	0.164798	1.10736		14967	b0842	0.199979	1.34673			14967	b0842	0.135374	0.846378		14967	b0842	0.162325	1.02867		14967	b0842	0.209896	1.36647			14967	b0842	-0.00760148	-0.0426526		14967	b0842	0.155795	0.966588		14967	b0842	0.191181	1.2473
14968	b0843	0.119929	0.252216		14968	b0843	0.223371	0.498534		14968	b0843	0.0536812	0.14073			14968	b0843	-0.277006	-0.705984		14968	b0843	0.154521	0.348901		14968	b0843	-0.00504586	-0.00841033			14968	b0843	-0.315706	-0.681267		14968	b0843	-0.210465	-0.389428		14968	b0843	0.0387878	0.119134
14969	b0844	0.148572	0.616095		14969	b0844	0.420334	1.77288		14969	b0844	0.274844	1.03344			14969	b0844	0.261825	0.994311		14969	b0844	0.256139	1.00965		14969	b0844	0.189288	0.699533			14969	b0844	0.262397	1.0636		14969	b0844	0.291861	1.19317		14969	b0844	0.234973	0.957624
14970	b0845	0.0657056	0.354124		14970	b0845	0.0456201	0.218668		14970	b0845	0.0703461	0.366497			14970	b0845	0.0953899	0.48951		14970	b0845	0.142359	0.757631		14970	b0845	0.146446	0.748532			14970	b0845	-0.0305891	-0.161086		14970	b0845	0.0467216	0.242647		14970	b0845	0.135413	0.710081
14971	b0846	-0.443109	-1.91172		14971	b0846	-0.499419	-2.27904		14971	b0846	-0.407521	-2.02548			14971	b0846	-0.547769	-3.03687		14971	b0846	-0.364717	-1.62901		14971	b0846	-0.502287	-2.17793			14971	b0846	-0.513894	-2.13634		14971	b0846	-0.338026	-1.76473		14971	b0846	-0.523168	-2.42569
14972	b0847	-0.0208612	-0.129251		14972	b0847	0.140577	0.839734		14972	b0847	-0.0138261	-0.0838297			14972	b0847	0.0468525	0.313957		14972	b0847	0.0408591	0.23783		14972	b0847	0.0336215	0.19951			14972	b0847	0.108194	0.655299		14972	b0847	0.0837572	0.533717		14972	b0847	0.00116703	0.00718621
14973	b0848	-0.529525	-2.7683		14973	b0848	-0.412263	-2.11203		14973	b0848	-0.320506	-1.4822			14973	b0848	-0.270527	-1.34886		14973	b0848	-0.240623	-1.20689		14973	b0848	-0.372466	-1.84751			14973	b0848	-0.419695	-2.33508		14973	b0848	-0.227794	-1.15156		14973	b0848	-0.368002	-1.8793
14975	b0850	-0.297496	-0.645471		14975	b0850	-0.129599	-0.271274		14975	b0850	-0.279809	-0.515536			14975	b0850	-0.184633	-0.392425		14975	b0850	-0.306078	-0.719414		14975	b0850	-0.246028	-0.530728			14975	b0850	0.0713162	0.193187		14975	b0850	-0.430176	-0.976002		14975	b0850	-0.193172	-0.401507
14976	b0851	0.699923	2.28827		14976	b0851	0.53172	1.62524		14976	b0851	0.886672	3.25983			14976	b0851	0.699727	2.79957		14976	b0851	0.723101	2.25082		14976	b0851	0.690993	2.26263			14976	b0851	0.282799	1.0256		14976	b0851	0.772734	2.93365		14976	b0851	0.841903	3.50369
14977	b0852	-0.0472713	-0.211638		14977	b0852	-0.0201519	-0.0986842		14977	b0852	-0.107102	-0.545463			14977	b0852	-0.310202	-1.29129		14977	b0852	-0.0255503	-0.110021		14977	b0852	-0.0694413	-0.328575			14977	b0852	0.145669	0.64036		14977	b0852	-0.134412	-0.678321		14977	b0852	-0.0897852	-0.40565
14978	b0853	-0.392006	-1.37435		14978	b0853	-0.0346484	-0.0930624		14978	b0853	-0.0845775	-0.22663			14978	b0853	-0.238868	-0.778138		14978	b0853	-0.169916	-0.415224		14978	b0853	-0.184296	-0.539059			14978	b0853	-0.384338	-1.11338		14978	b0853	-0.0192352	-0.0548509		14978	b0853	-0.224346	-0.620325
14979	b0854	0.0269766	0.136401		14979	b0854	-0.079697	-0.348493		14979	b0854	0.128464	0.628938			14979	b0854	-0.00272768	-0.0129057		14979	b0854	0.00731355	0.0384382		14979	b0854	0.207501	0.982866			14979	b0854	0.149139	0.643893		14979	b0854	0.0594179	0.290312		14979	b0854	0.13069	0.544513
14980	b0855	-0.0633758	-0.377464		14980	b0855	-0.10293	-0.55585		14980	b0855	-0.108842	-0.614194			14980	b0855	0.0190117	0.111491		14980	b0855	-0.0513892	-0.270954		14980	b0855	-0.00475977	-0.0272637			14980	b0855	-0.025518	-0.13931		14980	b0855	0.0381604	0.19909		14980	b0855	0.0637422	0.377668
14981	b0856	-0.276319	-1.03473		14981	b0856	-0.466711	-1.81741		14981	b0856	-0.223744	-0.921514			14981	b0856	-0.334079	-1.21327		14981	b0856	-0.400962	-1.23246		14981	b0856	-0.439904	-1.35729			14981	b0856	-0.138165	-0.455386		14981	b0856	-0.359288	-1.15559		14981	b0856	-0.338309	-1.15187
14982	b0857	-0.247207	-1.048		14982	b0857	-0.296392	-1.23671		14982	b0857	-0.258954	-0.864084			14982	b0857	-0.385674	-1.17959		14982	b0857	-0.26661	-0.851237		14982	b0857	-0.103716	-0.42204			14982	b0857	-0.254188	-0.852905		14982	b0857	-0.391974	-1.3549		14982	b0857	-0.415895	-1.856
14984	b0859	-0.128882	-0.780674		14984	b0859	-0.158609	-0.914163		14984	b0859	-0.141534	-0.853743			14984	b0859	-0.173592	-1.17567		14984	b0859	-0.0337313	-0.213104		14984	b0859	0.0171013	0.104533			14984	b0859	-0.15809	-0.935823		14984	b0859	-0.108596	-0.616265		14984	b0859	-0.0460785	-0.293291
14985	b0860	0.0389849	0.183476		14985	b0860	-0.023505	-0.127259		14985	b0860	0.00422733	0.0213867			14985	b0860	0.0442863	0.252077		14985	b0860	0.0668856	0.313988		14985	b0860	-0.0880295	-0.378385			14985	b0860	-0.164812	-0.780352		14985	b0860	-0.0900325	-0.398245		14985	b0860	-0.0733858	-0.341694
14986	b0861	-0.114587	-0.56829		14986	b0861	-0.135408	-0.809833		14986	b0861	-0.137435	-0.772727			14986	b0861	0.0236763	0.134481		14986	b0861	0.0660539	0.313299		14986	b0861	0.00956075	0.0558713			14986	b0861	-0.264963	-1.42929		14986	b0861	-0.151713	-0.821103		14986	b0861	-0.15999	-0.849434
14987	b0862	-0.209221	-0.443685		14987	b0862	0.190665	0.426966		14987	b0862	-0.214834	-0.435425			14987	b0862	0.0835336	0.174698		14987	b0862	0.245479	0.567136		14987	b0862	-0.100076	-0.17247			14987	b0862	-0.155602	-0.286264		14987	b0862	-0.0754384	-0.145504		14987	b0862	-0.309114	-0.593892
14988	b0863	-0.00721349	-0.0361998		14988	b0863	-0.128361	-0.682364		14988	b0863	-0.0618036	-0.273347			14988	b0863	0.0195253	0.0871974		14988	b0863	-0.0136249	-0.0576398		14988	b0863	0.0665284	0.268239			14988	b0863	0.0815954	0.323123		14988	b0863	-0.0792759	-0.338766		14988	b0863	-0.0681296	-0.290764
14989	b0864	0.459004	1.47627		14989	b0864	0.528695	1.63611		14989	b0864	0.38102	1.36051			14989	b0864	0.726866	2.3281		14989	b0864	0.540462	1.62971		14989	b0864	0.687168	2.03087			14989	b0864	0.445041	1.25977		14989	b0864	0.502348	1.87874		14989	b0864	0.366136	1.15759
14990	b0865	0.107759	0.336222		14990	b0865	-0.0409991	-0.129574		14990	b0865	0.0292377	0.103263			14990	b0865	-0.0926447	-0.349797		14990	b0865	0.274819	1.04702		14990	b0865	0.0399259	0.141545			14990	b0865	0.0327082	0.111312		14990	b0865	0.203482	0.806284		14990	b0865	0.224174	0.719986
14992	b0867	0.00713628	0.0399168		14992	b0867	0.15658	0.813		14992	b0867	0.116988	0.721592			14992	b0867	0.174843	1.10454		14992	b0867	0.184361	1.05498		14992	b0867	0.196473	1.06409			14992	b0867	0.0479381	0.264663		14992	b0867	0.123882	0.661494		14992	b0867	0.207297	1.22366
14993	b0868	0.195416	1.08501		14993	b0868	0.255224	1.39461		14993	b0868	0.197444	1.00586			14993	b0868	0.2667	1.42063		14993	b0868	0.30342	1.60237		14993	b0868	0.242543	1.31427			14993	b0868	0.183915	0.990418		14993	b0868	0.199629	1.01789		14993	b0868	0.316477	1.67328
14994	b0869	-0.0442071	-0.210512		14994	b0869	-0.0703886	-0.321916		14994	b0869	-0.0841048	-0.36046			14994	b0869	-0.0876981	-0.368955		14994	b0869	-0.0014728	-0.00693609		14994	b0869	-0.0697412	-0.30168			14994	b0869	-0.0336156	-0.138842		14994	b0869	-0.0387257	-0.160954		14994	b0869	-0.00416372	-0.0163948
14995	b0870	-0.149417	-0.697667		14995	b0870	-0.0932077	-0.437608		14995	b0870	-0.255994	-1.15575			14995	b0870	-0.232968	-1.00094		14995	b0870	-0.258038	-1.13645		14995	b0870	-0.21553	-1.00386			14995	b0870	-0.165808	-0.770862		14995	b0870	-0.031455	-0.161586		14995	b0870	0.014778	0.0691118
14996	b0871	-0.0496136	-0.310504		14996	b0871	-0.0427692	-0.257324		14996	b0871	-0.230951	-1.41962			14996	b0871	-0.160208	-1.02688		14996	b0871	0.0156851	0.0910001		14996	b0871	-0.0922248	-0.578556			14996	b0871	-0.17272	-1.03638		14996	b0871	-0.12727	-0.839746		14996	b0871	-0.0215067	-0.131244
14997	b0872	0.364099	0.904466		14997	b0872	0.399438	0.982328		14997	b0872	0.49293	1.01102			14997	b0872	0.457678	1.11402		14997	b0872	0.37557	0.963736		14997	b0872	0.537762	1.2756			14997	b0872	0.280616	0.619204		14997	b0872	0.383871	0.81178		14997	b0872	0.410097	1.03232
14998	b0873	0.0480539	0.345802		14998	b0873	0.0359935	0.246964		14998	b0873	0.0680603	0.448645			14998	b0873	-0.00188638	-0.0134327		14998	b0873	0.126301	0.874514		14998	b0873	0.126399	0.844965			14998	b0873	-0.0400596	-0.274213		14998	b0873	0.0560664	0.378688		14998	b0873	0.0951974	0.600324
14999	b0874	-0.0172364	-0.0973917		14999	b0874	-0.0414778	-0.237941		14999	b0874	-0.0665682	-0.39324			14999	b0874	-0.0799755	-0.474135		14999	b0874	-0.0835333	-0.448792		14999	b0874	-0.0394192	-0.23791			14999	b0874	-0.0712359	-0.414031		14999	b0874	-0.0665132	-0.388714		14999	b0874	-0.0517296	-0.305196
15000	b0875	-0.111674	-0.449132		15000	b0875	-0.143216	-0.598756		15000	b0875	-0.0695923	-0.315406			15000	b0875	-0.0325315	-0.150529		15000	b0875	-0.0473899	-0.213747		15000	b0875	0.0379049	0.149443			15000	b0875	-0.488711	-1.70417		15000	b0875	-0.0603275	-0.253859		15000	b0875	0.0109023	0.0461105
15001	b0876	-0.268797	-1.1303		15001	b0876	-0.304417	-1.30932		15001	b0876	-0.350633	-1.59534			15001	b0876	-0.328046	-1.49439		15001	b0876	-0.306754	-1.31957		15001	b0876	-0.233582	-1.05287			15001	b0876	-0.316032	-1.41464		15001	b0876	-0.272198	-1.13503		15001	b0876	-0.301007	-1.20827
15002	b0877	-0.136085	-0.691118		15002	b0877	-0.0690395	-0.361328		15002	b0877	-0.119646	-0.582361			15002	b0877	-0.134759	-0.625442		15002	b0877	0.0700186	0.412701		15002	b0877	0.00481179	0.0251634			15002	b0877	-0.158769	-0.893304		15002	b0877	-0.0205146	-0.121898		15002	b0877	0.102336	0.580124
15003	b0878	0.038147	0.168582		15003	b0878	0.126209	0.554		15003	b0878	0.10101	0.443489			15003	b0878	-0.0125118	-0.0408645		15003	b0878	0.112454	0.458665		15003	b0878	0.207871	0.78825			15003	b0878	0.00425318	0.0186501		15003	b0878	0.113026	0.431148		15003	b0878	0.0872307	0.338106
15004	b0879	-0.16219	-0.911526		15004	b0879	0.0178227	0.0971087		15004	b0879	-0.132863	-0.730383			15004	b0879	-0.0982348	-0.508295		15004	b0879	-0.0102704	-0.061148		15004	b0879	-0.0574064	-0.31085			15004	b0879	0.0158627	0.0795827		15004	b0879	-0.1191	-0.657827		15004	b0879	-0.0948807	-0.526064
15007	b0882	-0.729658	-3.37089		15007	b0882	-0.41292	-2.25121		15007	b0882	-0.485288	-2.31881			15007	b0882	-0.444683	-2.25075		15007	b0882	-0.309308	-1.60232		15007	b0882	-0.523034	-2.46047			15007	b0882	-0.677749	-2.99829		15007	b0882	-0.535277	-2.33843		15007	b0882	-0.45036	-2.16603
15009	b0885	-0.0209296	-0.0577127		15009	b0885	0.109618	0.368257		15009	b0885	0.130374	0.450279			15009	b0885	-0.0560879	-0.187833		15009	b0885	0.0196267	0.0566418		15009	b0885	0.0591838	0.169488			15009	b0885	0.211747	0.695555		15009	b0885	0.0868006	0.271725		15009	b0885	0.044034	0.136328
15016	b0892	0.143269	0.881145		15016	b0892	0.12615	0.85697		15016	b0892	0.172251	1.11805			15016	b0892	0.0176335	0.106318		15016	b0892	0.119414	0.733601		15016	b0892	0.21381	1.34359			15016	b0892	0.18536	1.17046		15016	b0892	0.212276	1.45946		15016	b0892	0.126478	0.778831
15018	b0894	-0.0227194	-0.152377		15018	b0894	-0.0391075	-0.241905		15018	b0894	-0.0168976	-0.112079			15018	b0894	-0.0994846	-0.664839		15018	b0894	-0.00704793	-0.0463917		15018	b0894	0.0724385	0.443138			15018	b0894	-0.144788	-0.987769		15018	b0894	-0.0115276	-0.0791094		15018	b0894	0.0227335	0.147298
15019	b0895	-0.0636857	-0.281566		15019	b0895	0.0352461	0.169605		15019	b0895	-0.0125948	-0.0722004			15019	b0895	0.103483	0.571189		15019	b0895	-0.0353655	-0.201918		15019	b0895	0.196318	0.99887			15019	b0895	-0.0600826	-0.271359		15019	b0895	0.0995144	0.525314		15019	b0895	0.115685	0.497816
15020	b0896	0.166775	0.87441		15020	b0896	0.15374	0.817487		15020	b0896	0.0875841	0.45808			15020	b0896	0.0911568	0.476437		15020	b0896	0.103503	0.556061		15020	b0896	0.0980518	0.529739			15020	b0896	0.119087	0.63904		15020	b0896	0.123411	0.633864		15020	b0896	0.140733	0.748707
15021	b0897	-0.397206	-1.63415		15021	b0897	-0.364593	-1.57781		15021	b0897	-0.428709	-1.78413			15021	b0897	-0.289647	-1.26604		15021	b0897	-0.402696	-1.78287		15021	b0897	-0.363822	-1.41013			15021	b0897	-0.274995	-0.849196		15021	b0897	-0.271982	-1.08386		15021	b0897	-0.308156	-1.41163
15022	b0898	0.27276	1.84746		15022	b0898	0.285726	1.94791		15022	b0898	0.319382	2.21096			15022	b0898	0.249785	1.55449		15022	b0898	0.167499	1.11578		15022	b0898	0.354603	2.32499			15022	b0898	0.273208	1.67442		15022	b0898	0.238213	1.62692		15022	b0898	0.229099	1.58989
15023	b0899	-0.219063	-1.55262		15023	b0899	-0.255752	-1.81007		15023	b0899	-0.221803	-1.53164			15023	b0899	-0.265847	-1.87393		15023	b0899	-0.165798	-1.17065		15023	b0899	-0.234689	-1.64083			15023	b0899	-0.266449	-1.89777		15023	b0899	-0.250204	-1.7563		15023	b0899	-0.189223	-1.35137
15024	b0900	-0.0414891	-0.254379		15024	b0900	-0.0207101	-0.12994		15024	b0900	0.0133555	0.0811358			15024	b0900	0.0374627	0.226602		15024	b0900	-0.0264577	-0.166911		15024	b0900	-0.0139286	-0.0857219			15024	b0900	0.0440992	0.254097		15024	b0900	-0.0085582	-0.0510825		15024	b0900	0.126372	0.770418
15025	b0901	-0.168756	-1.15144		15025	b0901	-0.0944102	-0.64681		15025	b0901	-0.045232	-0.300956			15025	b0901	-0.172169	-1.21757		15025	b0901	-0.123967	-0.841921		15025	b0901	-0.0244175	-0.160463			15025	b0901	-0.0836086	-0.558209		15025	b0901	-0.0880419	-0.586808		15025	b0901	-0.049072	-0.332826
15026	b0902	-0.159404	-0.629281		15026	b0902	-0.213304	-0.778356		15026	b0902	-0.287759	-1.30708			15026	b0902	-0.244648	-1.04449		15026	b0902	-0.174632	-0.677154		15026	b0902	-0.209496	-0.862329			15026	b0902	-0.210808	-0.933459		15026	b0902	-0.29488	-1.08067		15026	b0902	-0.301806	-1.17612
15027	b0903	0.0178599	0.122669		15027	b0903	0.0531334	0.370585		15027	b0903	0.0229505	0.160029			15027	b0903	0.0374152	0.273817		15027	b0903	0.0772067	0.529549		15027	b0903	0.105325	0.766649			15027	b0903	-0.138122	-0.894016		15027	b0903	-0.0493028	-0.356414		15027	b0903	0.0813264	0.580083
15028	b0904	0.278307	1.42937		15028	b0904	0.115913	0.494298		15028	b0904	0.177006	0.706592			15028	b0904	0.210749	1.08241		15028	b0904	0.0188217	0.0917378		15028	b0904	0.226443	1.01569			15028	b0904	0.233646	0.895476		15028	b0904	0.122758	0.531639		15028	b0904	0.195236	0.775671
15029	b0905	-0.00387224	-0.0250095		15029	b0905	-0.0486629	-0.349456		15029	b0905	-0.200712	-1.42119			15029	b0905	-0.0503109	-0.341877		15029	b0905	-0.0964424	-0.639354		15029	b0905	0.0230823	0.158118			15029	b0905	-0.0264466	-0.177473		15029	b0905	-0.122973	-0.830365		15029	b0905	0.00447289	0.0294244
15030	b0906	0.0784422	0.404657		15030	b0906	-0.0133746	-0.058941		15030	b0906	-0.00192991	-0.0103899			15030	b0906	0.076223	0.405803		15030	b0906	0.0584888	0.29928		15030	b0906	0.133023	0.670164			15030	b0906	0.0030477	0.016164		15030	b0906	0.139403	0.737674		15030	b0906	0.0907741	0.445102
15031	b0907	-1.15502	-4.94261		15031	b0907	-1.77253	-5.91931		15031	b0907	-1.83863	-7.80913			15031	b0907	-0.62523	-3.30804		15031	b0907	-0.922775	-4.43872		15031	b0907	-1.66887	-6.72687			15031	b0907	-0.938871	-3.30077		15031	b0907	-1.57692	-6.73018		15031	b0907	-2.35507	-12.3915
15032	b0908	-1.34337	-4.04998		15032	b0908	-1.31683	-4.26698		15032	b0908	-1.68999	-3.85706			15032	b0908	-1.04885	-3.17761		15032	b0908	-0.970992	-3.19905		15032	b0908	-1.0524	-2.83681			15032	b0908	-0.899942	-2.37424		15032	b0908	-1.10949	-3.14763		15032	b0908	-1.24218	-3.70309
15033	b0909	0.230007	1.06574		15033	b0909	0.166581	0.755162		15033	b0909	0.0959764	0.42261			15033	b0909	0.0266371	0.114245		15033	b0909	0.0804601	0.331676		15033	b0909	0.127756	0.581508			15033	b0909	0.0735752	0.338189		15033	b0909	-0.041063	-0.172758		15033	b0909	0.197415	0.897509
15037	b0913	0.09913	0.680381		15037	b0913	0.0896553	0.644847		15037	b0913	-0.00248537	-0.0181059			15037	b0913	0.105385	0.780981		15037	b0913	0.0487807	0.360488		15037	b0913	0.188291	1.35367			15037	b0913	0.059295	0.40167		15037	b0913	0.0778929	0.542528		15037	b0913	0.173949	1.19149
15040	b0916	0.0981933	0.498636		15040	b0916	0.168573	0.919097		15040	b0916	-0.0304002	-0.151659			15040	b0916	-0.00822341	-0.0428446		15040	b0916	0.0831844	0.382502		15040	b0916	0.104686	0.524974			15040	b0916	0.0851587	0.448573		15040	b0916	0.0138516	0.0702943		15040	b0916	0.0625946	0.321912
15043	b0919	-0.0300866	-0.148252		15043	b0919	-0.0520746	-0.291155		15043	b0919	-0.000110839	-0.000585298			15043	b0919	-0.137221	-0.694227		15043	b0919	0.155737	0.836308		15043	b0919	0.0772677	0.407914			15043	b0919	-0.0426455	-0.189244		15043	b0919	0.0138397	0.073513		15043	b0919	0.019838	0.107078
15044	b0920	-0.160696	-0.88419		15044	b0920	-0.317709	-1.69902		15044	b0920	-0.413524	-2.25815			15044	b0920	-0.227147	-1.20656		15044	b0920	-0.567685	-2.54594		15044	b0920	-0.287755	-1.59222			15044	b0920	-0.204041	-1.10776		15044	b0920	-0.262078	-1.44353		15044	b0920	0.00952025	0.052849
15045	b0921	0.106944	0.500464		15045	b0921	0.0261082	0.111617		15045	b0921	0.0870215	0.462287			15045	b0921	0.0926863	0.443226		15045	b0921	-0.0187448	-0.0874284		15045	b0921	0.134	0.63917			15045	b0921	0.0641235	0.252616		15045	b0921	-0.0769393	-0.363938		15045	b0921	0.0450657	0.226946
15049	b0925	-0.102883	-0.544717		15049	b0925	-0.0567711	-0.31744		15049	b0925	-0.219344	-1.21635			15049	b0925	-0.174953	-1.00466		15049	b0925	-0.222529	-1.15843		15049	b0925	-0.178097	-0.838685			15049	b0925	-0.206828	-1.16705		15049	b0925	-0.202373	-1.16093		15049	b0925	-0.125836	-0.649406
15050	b0926	0.0677762	0.35382		15050	b0926	-0.0131932	-0.0552437		15050	b0926	-0.0731746	-0.294071			15050	b0926	0.154269	0.686477		15050	b0926	0.280405	1.24493		15050	b0926	0.109938	0.515355			15050	b0926	-0.0535956	-0.232867		15050	b0926	0.0870362	0.417373		15050	b0926	0.198236	0.910606
15051	b0927	-0.474786	-1.57607		15051	b0927	-0.507641	-1.64703		15051	b0927	-0.591471	-2.32756			15051	b0927	-0.77433	-2.02397		15051	b0927	-0.245997	-0.768518		15051	b0927	-0.482314	-1.44466			15051	b0927	-0.36515	-0.967905		15051	b0927	-0.567788	-1.71232		15051	b0927	-0.384701	-1.11964
15052	b0928	-0.568888	-2.44459		15052	b0928	-0.835323	-3.40564		15052	b0928	-1.02138	-4.26593			15052	b0928	-0.568745	-2.3701		15052	b0928	-0.479004	-1.95292		15052	b0928	-0.514927	-2.30462			15052	b0928	-0.697352	-2.93423		15052	b0928	-0.688262	-2.97274		15052	b0928	-0.923784	-3.94771
15053	b0929	-0.24897	-1.16851		15053	b0929	-0.429504	-1.85685		15053	b0929	-0.398967	-1.75831			15053	b0929	-0.270519	-1.44241		15053	b0929	-0.132267	-0.707827		15053	b0929	-0.258891	-1.29116			15053	b0929	-0.313726	-1.53593		15053	b0929	-0.227167	-1.25404		15053	b0929	-0.35403	-1.56012
15055	b0931	0.0980048	0.28529		15055	b0931	0.0873518	0.25618		15055	b0931	0.114311	0.364152			15055	b0931	-0.133727	-0.403836		15055	b0931	-0.0981664	-0.301085		15055	b0931	0.0369499	0.106611			15055	b0931	-0.146605	-0.487528		15055	b0931	-0.0085582	-0.025929		15055	b0931	0.252237	0.753705
15056	b0932	-0.19282	-1.15199		15056	b0932	-0.195551	-1.23065		15056	b0932	-0.251969	-1.54804			15056	b0932	-0.155249	-1.01691		15056	b0932	-0.231236	-1.43624		15056	b0932	-0.134419	-0.884215			15056	b0932	-0.142475	-0.900111		15056	b0932	-0.212659	-1.3607		15056	b0932	-0.153342	-0.959617
15057	b0933	0.0502228	0.161752		15057	b0933	0.0288257	0.0878126		15057	b0933	-0.152277	-0.473488			15057	b0933	-0.0111796	-0.0413717		15057	b0933	0.0331098	0.0978283		15057	b0933	-0.0324688	-0.112968			15057	b0933	0.129428	0.35541		15057	b0933	0.0790109	0.27599		15057	b0933	0.0864331	0.264596
15058	b0934	0.0357817	0.109304		15058	b0934	0.205638	0.599586		15058	b0934	0.0951717	0.233672			15058	b0934	-0.0857556	-0.205949		15058	b0934	-0.247595	-0.563166		15058	b0934	-0.0484657	-0.137911			15058	b0934	-0.352935	-0.950265		15058	b0934	-0.0782509	-0.237688		15058	b0934	0.0628115	0.167892
15059	b0935	0.00643549	0.0309067		15059	b0935	-0.0888532	-0.392166		15059	b0935	-0.0700742	-0.327418			15059	b0935	-0.0442513	-0.213012		15059	b0935	-0.181858	-0.882034		15059	b0935	0.0411165	0.191442			15059	b0935	-0.134235	-0.601075		15059	b0935	-0.0575001	-0.237611		15059	b0935	0.0475658	0.198286
15060	b0936	-0.0353575	-0.181208		15060	b0936	0.0240927	0.125482		15060	b0936	-0.0843536	-0.52848			15060	b0936	0.0442225	0.223533		15060	b0936	-0.0399044	-0.186154		15060	b0936	0.0932856	0.533781			15060	b0936	-0.148836	-0.687799		15060	b0936	0.113974	0.688244		15060	b0936	0.164129	0.977535
15062	b0938	0.0230823	0.099953		15062	b0938	-0.0349522	-0.150766		15062	b0938	-0.137093	-0.465961			15062	b0938	0.210554	0.909734		15062	b0938	0.150237	0.686728		15062	b0938	-0.0126724	-0.0487005			15062	b0938	-0.0142474	-0.0536411		15062	b0938	0.0254917	0.11182		15062	b0938	-0.0645968	-0.216109
15063	b0939	-0.319189	-1.90239		15063	b0939	-0.171104	-1.03073		15063	b0939	-0.303174	-1.90108			15063	b0939	-0.287766	-1.73874		15063	b0939	-0.326326	-1.80821		15063	b0939	-0.219672	-1.27288			15063	b0939	-0.299824	-1.51402		15063	b0939	-0.242228	-1.40975		15063	b0939	-0.13777	-0.861625
15064	b0940	-0.0065715	-0.0481494		15064	b0940	-0.0107502	-0.0749955		15064	b0940	-0.0349312	-0.241596			15064	b0940	0.0380842	0.277238		15064	b0940	-0.0431348	-0.29182		15064	b0940	-0.0269983	-0.186536			15064	b0940	-0.0416573	-0.296316		15064	b0940	-0.0179829	-0.127356		15064	b0940	0.064365	0.464345
15065	b0941	0.126567	0.821303		15065	b0941	0.174024	1.08164		15065	b0941	0.133244	0.869211			15065	b0941	0.173107	1.10697		15065	b0941	0.158563	0.952303		15065	b0941	0.248749	1.64929			15065	b0941	-0.0355789	-0.218638		15065	b0941	0.181381	1.18789		15065	b0941	0.260352	1.62628
15066	b0942	-0.036138	-0.140017		15066	b0942	-0.0377694	-0.139839		15066	b0942	0.00408601	0.0159685			15066	b0942	-0.0362794	-0.136634		15066	b0942	0.0634524	0.216024		15066	b0942	0.0900132	0.325495			15066	b0942	-0.0399927	-0.164286		15066	b0942	-0.0768323	-0.290021		15066	b0942	-0.128452	-0.471291
15067	b0943	-0.199647	-0.63126		15067	b0943	-0.158643	-0.516984		15067	b0943	-0.140196	-0.394508			15067	b0943	-0.0956471	-0.314574		15067	b0943	-0.0431512	-0.156982		15067	b0943	-0.079079	-0.303637			15067	b0943	-0.0563842	-0.179301		15067	b0943	-0.281285	-0.974839		15067	b0943	-0.232542	-0.817873
15068	b0944	-0.0517454	-0.20246		15068	b0944	-0.0257843	-0.116669		15068	b0944	0.0784129	0.371767			15068	b0944	-0.0934556	-0.437701		15068	b0944	-0.0491063	-0.215861		15068	b0944	0.0450483	0.176599			15068	b0944	-0.110193	-0.448138		15068	b0944	0.0214539	0.0959081		15068	b0944	-0.0315088	-0.13025
15069	b0945	-0.165849	-0.797826		15069	b0945	0.137082	0.690701		15069	b0945	-0.513693	-2.48344			15069	b0945	-0.162237	-0.823444		15069	b0945	-0.471715	-2.426		15069	b0945	-0.293482	-1.21142			15069	b0945	-0.199119	-0.734351		15069	b0945	-0.191263	-0.932216		15069	b0945	-0.323078	-1.56895
15070	b0946	-0.381135	-1.19338		15070	b0946	-0.159786	-0.541387		15070	b0946	-0.167844	-0.521924			15070	b0946	-0.119681	-0.405395		15070	b0946	-0.145457	-0.462164		15070	b0946	-0.157471	-0.614754			15070	b0946	-0.0616496	-0.252238		15070	b0946	-0.160904	-0.532638		15070	b0946	-0.217249	-0.783361
15071	b0947	0.00436344	0.0194333		15071	b0947	0.0619914	0.281563		15071	b0947	0.0155173	0.0752571			15071	b0947	-0.22222	-0.938077		15071	b0947	-0.00647922	-0.031324		15071	b0947	0.0461901	0.183146			15071	b0947	-0.155661	-0.67789		15071	b0947	0.00441907	0.0182048		15071	b0947	0.103469	0.526814
15072	b0948	-0.0482959	-0.288406		15072	b0948	-0.0185575	-0.1076		15072	b0948	-0.156466	-0.929739			15072	b0948	0.123163	0.768788		15072	b0948	0.0581529	0.350912		15072	b0948	-0.0233648	-0.133835			15072	b0948	0.119945	0.706158		15072	b0948	0.00526664	0.0288638		15072	b0948	0.00447289	0.0255357
15073	b0949	-0.146216	-0.760807		15073	b0949	-0.273153	-1.41182		15073	b0949	-0.257373	-1.31951			15073	b0949	-0.246458	-1.34254		15073	b0949	-0.349845	-1.71404		15073	b0949	-0.193695	-0.968141			15073	b0949	-0.403989	-2.30654		15073	b0949	-0.0625111	-0.329898		15073	b0949	-0.254696	-1.28029
15074	b0950	0.293379	1.48659		15074	b0950	0.184051	0.900761		15074	b0950	0.110582	0.542338			15074	b0950	0.256027	1.17202		15074	b0950	0.169569	0.800316		15074	b0950	0.153932	0.747917			15074	b0950	0.0966656	0.536613		15074	b0950	0.186519	0.890933		15074	b0950	0.204487	0.965452
15075	b0951	-0.0276161	-0.17602		15075	b0951	-0.0401143	-0.270198		15075	b0951	0.00400408	0.0268948			15075	b0951	0.110548	0.679707		15075	b0951	-0.0850273	-0.543642		15075	b0951	-0.0126003	-0.0843427			15075	b0951	0.065086	0.435281		15075	b0951	-0.0349423	-0.228427		15075	b0951	-0.0108966	-0.0717953
15076	b0952	0.0898207	0.478883		15076	b0952	0.257971	1.58563		15076	b0952	0.111372	0.572163			15076	b0952	0.286306	1.27304		15076	b0952	-0.0247896	-0.112923		15076	b0952	0.0757383	0.383775			15076	b0952	0.348226	1.59596		15076	b0952	0.0783624	0.421688		15076	b0952	0.0317206	0.158137
15077	b0953	-0.185787	-0.446835		15077	b0953	-0.211104	-0.567845		15077	b0953	-0.293806	-0.696005			15077	b0953	-0.0641422	-0.152844		15077	b0953	-0.147799	-0.297306		15077	b0953	-0.0962096	-0.233828			15077	b0953	-0.217857	-0.575079		15077	b0953	-0.47173	-1.24637		15077	b0953	-0.102731	-0.287297
15079	b0955	0.185093	1.17188		15079	b0955	0.229182	1.51426		15079	b0955	0.211769	1.38524			15079	b0955	0.0435409	0.25506		15079	b0955	0.158528	1.01923		15079	b0955	0.202436	1.28661			15079	b0955	0.111595	0.696096		15079	b0955	0.164756	1.08676		15079	b0955	0.254985	1.62375
15082	b0958	0.155272	0.650155		15082	b0958	0.330175	1.74258		15082	b0958	0.202022	0.979379			15082	b0958	0.212839	0.989338		15082	b0958	0.307824	1.37624		15082	b0958	0.298788	1.56079			15082	b0958	0.337273	1.54738		15082	b0958	0.26238	1.25141		15082	b0958	0.263375	1.13957
15083	b0959	0.152223	0.650736		15083	b0959	0.268921	1.41578		15083	b0959	0.0583315	0.298591			15083	b0959	0.130332	0.658409		15083	b0959	0.116748	0.608629		15083	b0959	0.215448	0.996496			15083	b0959	0.153661	0.647311		15083	b0959	0.286326	1.33614		15083	b0959	0.201914	1.04511
15084	b0960	0.154725	1.17197		15084	b0960	0.181058	1.23182		15084	b0960	0.203509	1.4849			15084	b0960	0.111959	0.781182		15084	b0960	0.257417	1.80638		15084	b0960	0.249204	1.75695			15084	b0960	0.202737	1.52085		15084	b0960	0.234371	1.73164		15084	b0960	0.297403	2.15407
15085	b0961	0.27513	0.91969		15085	b0961	0.286681	0.981965		15085	b0961	0.255456	0.846958			15085	b0961	0.221225	0.742446		15085	b0961	0.359344	1.29219		15085	b0961	0.423481	1.33351			15085	b0961	0.270311	0.826049		15085	b0961	0.335476	1.09836		15085	b0961	0.343081	1.23968
15086	b0962	-0.112204	-0.480367		15086	b0962	-0.0610572	-0.260579		15086	b0962	-0.172926	-0.755388			15086	b0962	-0.152869	-0.666598		15086	b0962	-0.274664	-1.08573		15086	b0962	-0.19057	-0.776006			15086	b0962	0.0346636	0.168963		15086	b0962	-0.0740652	-0.322549		15086	b0962	-0.17946	-0.866909
15087	b0963	0.148143	0.858893		15087	b0963	0.0186233	0.111163		15087	b0963	0.0463963	0.241432			15087	b0963	0.224734	1.28894		15087	b0963	0.0809647	0.47418		15087	b0963	0.184252	1.14727			15087	b0963	0.157239	0.790794		15087	b0963	0.0844159	0.530978		15087	b0963	0.0863993	0.463617
15088	b0964	-0.0898518	-0.301289		15088	b0964	0.129013	0.423091		15088	b0964	-0.217912	-0.7511			15088	b0964	-0.0085549	-0.0289616		15088	b0964	-0.0202637	-0.0716794		15088	b0964	-0.000999469	-0.00358936			15088	b0964	0.00761257	0.0273101		15088	b0964	-0.0558058	-0.19321		15088	b0964	-0.0216075	-0.0794815
15089	b0965	0.243591	0.495681		15089	b0965	0.0535122	0.117801		15089	b0965	-0.0120119	-0.0180386			15089	b0965	0.0713152	0.104791		15089	b0965	-0.0703484	-0.0770143		15089	b0965	0.103391	0.16687			15089	b0965	-0.232749	-0.323295		15089	b0965	-0.0356547	-0.0689346		15089	b0965	-0.0188245	-0.0233293
15090	b0966	0.128044	0.664937		15090	b0966	0.0914903	0.423187		15090	b0966	0.14697	0.795726			15090	b0966	0.257607	1.2785		15090	b0966	0.0422844	0.22748		15090	b0966	0.143636	0.749125			15090	b0966	0.00863574	0.0405609		15090	b0966	0.0776629	0.423987		15090	b0966	0.164425	0.787046
15091	b0967	0.259133	1.3252		15091	b0967	0.288066	1.5106		15091	b0967	0.301939	1.51853			15091	b0967	0.289439	1.44765		15091	b0967	0.101303	0.565994		15091	b0967	0.313252	1.6082			15091	b0967	0.373484	1.59284		15091	b0967	0.233497	1.07903		15091	b0967	0.212626	1.15321
15092	b0968	0.180559	0.531247		15092	b0968	0.14485	0.411609		15092	b0968	0.0755129	0.191612			15092	b0968	0.301834	0.861925		15092	b0968	0.102429	0.325444		15092	b0968	-0.0335792	-0.090093			15092	b0968	0.0773726	0.23262		15092	b0968	-0.0991339	-0.273377		15092	b0968	0.199815	0.463384
15094	b0970	-0.01757	-0.0566811		15094	b0970	-0.0513267	-0.152675		15094	b0970	-0.043026	-0.121605			15094	b0970	-0.0581317	-0.211905		15094	b0970	-0.188154	-0.638302		15094	b0970	0.0185926	0.060985			15094	b0970	-0.00234052	-0.00800703		15094	b0970	0.00855342	0.0296277		15094	b0970	-0.0412338	-0.130841
15095	b0972	0.170604	0.761083		15095	b0972	0.178345	0.94911		15095	b0972	0.103599	0.454018			15095	b0972	0.283515	1.30993		15095	b0972	0.156024	0.755012		15095	b0972	0.244016	1.19427			15095	b0972	0.3216	1.4682		15095	b0972	0.17269	0.807175		15095	b0972	0.25686	1.22509
15096	b0973	-0.0412971	-0.201694		15096	b0973	0.0234297	0.114047		15096	b0973	0.00233068	0.0121573			15096	b0973	-0.0164815	-0.0833111		15096	b0973	-0.0178445	-0.0933115		15096	b0973	-0.00194592	-0.00970106			15096	b0973	-0.0164514	-0.0855832		15096	b0973	0.0117295	0.0572174		15096	b0973	0.0520646	0.280968
15097	b0974	0.446447	1.92306		15097	b0974	0.550723	2.34953		15097	b0974	0.224316	0.828773			15097	b0974	0.331302	1.39412		15097	b0974	0.0944861	0.382022		15097	b0974	0.469646	2.06576			15097	b0974	0.341191	1.44945		15097	b0974	0.341367	1.28645		15097	b0974	0.397084	1.56147
15098	b0975	-0.00701859	-0.0359307		15098	b0975	-0.198215	-1.05461		15098	b0975	-0.0480682	-0.240859			15098	b0975	-0.0221642	-0.116704		15098	b0975	-0.0849471	-0.421492		15098	b0975	-0.0753998	-0.418857			15098	b0975	-0.131486	-0.712246		15098	b0975	-0.108533	-0.598108		15098	b0975	-0.0611374	-0.339563
15099	b0976	0.477407	1.57741		15099	b0976	0.100172	0.332157		15099	b0976	0.230498	0.766876			15099	b0976	0.289456	1.0287		15099	b0976	0.0458486	0.151594		15099	b0976	0.387698	0.924114			15099	b0976	0.458526	1.47867		15099	b0976	0.420273	1.44717		15099	b0976	0.181699	0.562223
15100	b0977	0.35515	0.953733		15100	b0977	0.331999	0.951447		15100	b0977	0.201321	0.531673			15100	b0977	0.441803	1.23228		15100	b0977	0.255633	0.864096		15100	b0977	0.350381	0.874782			15100	b0977	0.378835	1.11001		15100	b0977	0.26111	0.624364		15100	b0977	0.360012	0.96606
15101	b0978	0.0333452	0.188457		15101	b0978	0.0390908	0.208912		15101	b0978	-0.0173866	-0.0873503			15101	b0978	0.0109811	0.0595484		15101	b0978	-0.0753455	-0.369527		15101	b0978	-7.85167e-05	-0.000438165			15101	b0978	0.132255	0.734971		15101	b0978	0.00125803	0.00667444		15101	b0978	-0.00274464	-0.0146547
15102	b0979	0.0762848	0.277784		15102	b0979	-0.0561481	-0.223161		15102	b0979	-0.109116	-0.471621			15102	b0979	0.0612193	0.271345		15102	b0979	0.0219221	0.0827711		15102	b0979	0.0983375	0.446245			15102	b0979	-0.214501	-0.878398		15102	b0979	0.156336	0.603668		15102	b0979	0.142355	0.475198
15104	b0980	0.27495	1.62341		15104	b0980	0.398711	2.26566		15104	b0980	0.208656	1.2365			15104	b0980	0.371145	2.16713		15104	b0980	0.13175	0.748014		15104	b0980	0.267304	1.60677			15104	b0980	0.359901	1.95304		15104	b0980	0.20933	1.12635		15104	b0980	0.202577	1.20814
15105	b0981	0.0516398	0.34879		15105	b0981	-0.0878467	-0.533777		15105	b0981	-0.0971073	-0.608053			15105	b0981	-0.170103	-0.97286		15105	b0981	-0.156797	-1.01668		15105	b0981	-0.021892	-0.137663			15105	b0981	-0.188606	-0.922626		15105	b0981	-0.0210253	-0.142622		15105	b0981	-0.136231	-0.826189
15106	b0982	0.35095	1.7127		15106	b0982	0.486296	2.38621		15106	b0982	0.438999	2.45497			15106	b0982	0.377641	2.06205		15106	b0982	0.373428	1.99083		15106	b0982	0.386056	2.11185			15106	b0982	0.414057	1.84039		15106	b0982	0.288171	1.62312		15106	b0982	0.320923	1.4799
15107	b0983	0.0509338	0.260476		15107	b0983	-0.0746026	-0.364067		15107	b0983	-0.127898	-0.617451			15107	b0983	-0.0222959	-0.113182		15107	b0983	-0.0795113	-0.397536		15107	b0983	0.0197553	0.100983			15107	b0983	-0.033473	-0.157964		15107	b0983	-0.105998	-0.525127		15107	b0983	-0.0518929	-0.257712
15108	b0984	0.100977	0.679964		15108	b0984	0.116206	0.824798		15108	b0984	0.0015909	0.0107252			15108	b0984	0.106542	0.722153		15108	b0984	-0.030773	-0.216678		15108	b0984	0.0513641	0.347834			15108	b0984	0.124262	0.8582		15108	b0984	0.0562565	0.366284		15108	b0984	0.00447289	0.0321572
15109	b0985	0.0385497	0.189153		15109	b0985	0.0612331	0.338581		15109	b0985	0.226747	1.12799			15109	b0985	0.201049	1.02496		15109	b0985	0.142256	0.654119		15109	b0985	0.107886	0.526318			15109	b0985	0.00802318	0.0314632		15109	b0985	0.0760549	0.445725		15109	b0985	0.153453	0.831056
15110	b0986	0.0551991	0.358897		15110	b0986	0.0964092	0.639375		15110	b0986	0.034928	0.227692			15110	b0986	0.0924775	0.614425		15110	b0986	0.00742327	0.0479751		15110	b0986	0.0775358	0.520542			15110	b0986	0.0357489	0.221429		15110	b0986	0.0267863	0.179626		15110	b0986	0.0503216	0.329332
15111	b0987	0.207018	0.87587		15111	b0987	0.17108	0.699613		15111	b0987	0.156037	0.657958			15111	b0987	0.185173	0.801848		15111	b0987	0.0202421	0.0848181		15111	b0987	0.191976	0.824078			15111	b0987	0.225071	0.806989		15111	b0987	0.111554	0.46565		15111	b0987	0.229176	0.945977
15115	b0991	-0.408445	-1.859		15115	b0991	-0.522342	-2.17334		15115	b0991	-0.338194	-1.51334			15115	b0991	-0.272254	-1.09947		15115	b0991	-1.03667	-4.2509		15115	b0991	-0.350136	-1.57609			15115	b0991	-0.256858	-1.0177		15115	b0991	-0.177629	-0.788896		15115	b0991	-0.287461	-1.21046
15116	b0992	0.411106	2.17595		15116	b0992	0.373317	1.65481		15116	b0992	0.366669	1.77274			15116	b0992	0.416876	1.89946		15116	b0992	0.397515	1.8072		15116	b0992	0.464538	2.28816			15116	b0992	0.361497	1.84128		15116	b0992	0.418782	1.93155		15116	b0992	0.472527	2.40998
15117	b0993	0.245786	1.60251		15117	b0993	0.197911	1.26477		15117	b0993	0.121003	0.814581			15117	b0993	0.30131	2.04497		15117	b0993	0.174569	1.09729		15117	b0993	0.203566	1.36114			15117	b0993	0.245735	1.4388		15117	b0993	0.207284	1.36207		15117	b0993	0.202674	1.31348
15118	b0994	-0.311874	-1.88845		15118	b0994	-0.18296	-0.934919		15118	b0994	-0.255451	-1.46188			15118	b0994	-0.269726	-1.56456		15118	b0994	-0.342779	-1.76588		15118	b0994	-0.316954	-1.53704			15118	b0994	-0.630864	-2.5524		15118	b0994	-0.190588	-0.948661		15118	b0994	-0.227874	-1.41886
15119	b0995	-0.10683	-0.284221		15119	b0995	-0.198482	-0.678949		15119	b0995	-0.258692	-0.915116			15119	b0995	-0.163928	-0.487546		15119	b0995	-0.209037	-0.713055		15119	b0995	-0.116726	-0.465597			15119	b0995	-0.123322	-0.380724		15119	b0995	-0.164966	-0.533072		15119	b0995	-0.124964	-0.451785
15120	b0996	0.131351	0.811846		15120	b0996	0.0690854	0.468726		15120	b0996	0.110342	0.727963			15120	b0996	-0.00514688	-0.0302202		15120	b0996	0.197307	1.18554		15120	b0996	0.0561188	0.308822			15120	b0996	-0.0518494	-0.276602		15120	b0996	-0.0093638	-0.0530492		15120	b0996	0.140601	0.867498
15121	b0997	0.129816	0.815923		15121	b0997	0.115232	0.663628		15121	b0997	0.133757	0.759965			15121	b0997	0.067228	0.389672		15121	b0997	0.0824413	0.510534		15121	b0997	0.104963	0.633938			15121	b0997	0.0564936	0.300675		15121	b0997	0.117369	0.696268		15121	b0997	0.124851	0.74849
15123	b0999	-0.10741	-0.448082		15123	b0999	-0.165134	-0.737356		15123	b0999	-0.0827025	-0.294993			15123	b0999	-0.372875	-1.46188		15123	b0999	-0.0197772	-0.073138		15123	b0999	-0.11124	-0.410592			15123	b0999	-0.167079	-0.462527		15123	b0999	-0.247019	-0.896634		15123	b0999	0.241425	0.950455
15124	b1000	-0.00111552	-0.00401944		15124	b1000	0.0568299	0.206107		15124	b1000	0.0495206	0.167939			15124	b1000	0.0777948	0.287317		15124	b1000	-0.0974928	-0.288655		15124	b1000	-0.109145	-0.379171			15124	b1000	-0.00953782	-0.033497		15124	b1000	0.0613526	0.199386		15124	b1000	0.00421913	0.0157033
15126	b1002	0.0955522	0.542376		15126	b1002	0.2383	1.26746		15126	b1002	0.142666	0.727268			15126	b1002	0.178075	1.021		15126	b1002	-0.0747482	-0.399435		15126	b1002	0.100822	0.552401			15126	b1002	-0.0634227	-0.357616		15126	b1002	0.00341109	0.0179628		15126	b1002	0.029829	0.152787
15128	b1004	0.0385084	0.132142		15128	b1004	-0.114219	-0.389698		15128	b1004	-0.0670222	-0.248099			15128	b1004	-0.146853	-0.514424		15128	b1004	0.0367601	0.136669		15128	b1004	-0.0409014	-0.144846			15128	b1004	0.130992	0.432306		15128	b1004	-0.0875806	-0.31744		15128	b1004	0.010934	0.0418339
15130	b1006	0.171114	0.547686		15130	b1006	0.192085	0.683091		15130	b1006	0.168551	0.516604			15130	b1006	0.137935	0.544229		15130	b1006	0.267817	1.13837		15130	b1006	0.216091	0.748868			15130	b1006	0.281046	1.0327		15130	b1006	0.204988	0.681196		15130	b1006	0.234925	0.864119
15132	b1008	0.106369	0.301605		15132	b1008	0.0305595	0.0901782		15132	b1008	0.127135	0.387488			15132	b1008	0.141515	0.377838		15132	b1008	-0.0755401	-0.196326		15132	b1008	0.340837	1.09389			15132	b1008	0.115277	0.307004		15132	b1008	0.265687	0.783087		15132	b1008	-0.0989641	-0.310385
15133	b1009	0.284019	0.832049		15133	b1009	0.352084	1.15756		15133	b1009	0.449527	1.67384			15133	b1009	0.399747	1.36693		15133	b1009	0.173333	0.56098		15133	b1009	0.283371	0.903186			15133	b1009	0.147431	0.399537		15133	b1009	0.360729	1.12766		15133	b1009	0.331364	1.12907
15134	b1010	-0.0299484	-0.0972883		15134	b1010	0.0737196	0.216869		15134	b1010	-0.248589	-0.688691			15134	b1010	-0.0712668	-0.253485		15134	b1010	-0.244008	-0.690519		15134	b1010	-0.162548	-0.430196			15134	b1010	0.02204	0.0770566		15134	b1010	-0.0085582	-0.0330045		15134	b1010	0.0201711	0.0768278
15135	b1011	0.171993	0.680397		15135	b1011	0.0956438	0.373077		15135	b1011	0.196901	0.559109			15135	b1011	0.265339	0.701269		15135	b1011	0.185875	0.496689		15135	b1011	0.19277	0.803558			15135	b1011	0.0797385	0.233759		15135	b1011	0.288611	1.16812		15135	b1011	0.0337045	0.121693
15136	b1012	0.573722	2.7815		15136	b1012	0.502541	1.91503		15136	b1012	0.649429	2.54763			15136	b1012	0.508937	2.68643		15136	b1012	0.579291	1.93634		15136	b1012	0.612141	2.31064			15136	b1012	0.593845	2.22343		15136	b1012	0.51802	1.96819		15136	b1012	0.499555	2.25826
15137	b1013	-0.564762	-1.53342		15137	b1013	-0.589984	-1.43308		15137	b1013	-0.607605	-2.01715			15137	b1013	-0.170864	-0.524094		15137	b1013	-0.889092	-2.01539		15137	b1013	-0.371321	-1.35661			15137	b1013	-0.489387	-1.52389		15137	b1013	-0.6394	-2.34242		15137	b1013	-0.681584	-2.06121
15138	b1014	-0.22153	-1.72277		15138	b1014	-0.248377	-1.78666		15138	b1014	-0.267683	-2.01506			15138	b1014	-0.115229	-0.884343		15138	b1014	-0.311281	-2.32814		15138	b1014	-0.249305	-1.90507			15138	b1014	-0.205758	-1.61288		15138	b1014	-0.245203	-1.84141		15138	b1014	-0.311955	-2.36653
15139	b1015	0.243867	1.39872		15139	b1015	0.212837	1.2446		15139	b1015	0.220492	1.35073			15139	b1015	0.182862	0.984674		15139	b1015	0.181659	0.997631		15139	b1015	0.181403	1.05787			15139	b1015	0.119405	0.641737		15139	b1015	0.150622	0.908228		15139	b1015	0.0941293	0.5428
15141	b1018	0.353931	2.04957		15141	b1018	0.328332	1.84187		15141	b1018	0.314927	1.67648			15141	b1018	0.299482	1.48289		15141	b1018	0.172164	0.915432		15141	b1018	0.224625	1.12532			15141	b1018	0.194839	0.993086		15141	b1018	0.385723	2.08717		15141	b1018	0.272265	1.50621
15142	b1019	0.618975	2.84153		15142	b1019	0.642358	3.06322		15142	b1019	0.527605	2.64691			15142	b1019	0.590639	2.8953		15142	b1019	0.636334	3.02012		15142	b1019	0.56255	2.69113			15142	b1019	0.621181	2.7199		15142	b1019	0.63635	2.96783		15142	b1019	0.601925	2.79527
15143	b1020	-0.123177	-0.603751		15143	b1020	0.136749	0.64254		15143	b1020	-0.0444471	-0.192093			15143	b1020	-0.0420005	-0.165058		15143	b1020	0.0325325	0.164983		15143	b1020	-0.0439024	-0.214927			15143	b1020	0.0381934	0.194891		15143	b1020	0.129227	0.697139		15143	b1020	0.00406287	0.0188043
15144	b1021	-0.267131	-1.01338		15144	b1021	-0.622862	-2.67537		15144	b1021	-0.271437	-1.28707			15144	b1021	-0.251821	-0.834143		15144	b1021	-0.581176	-2.51152		15144	b1021	-0.23543	-1.03479			15144	b1021	-0.41159	-1.42908		15144	b1021	-0.163386	-0.685052		15144	b1021	-0.155515	-0.566954
15145	b1022	-0.364725	-2.10255		15145	b1022	-0.410529	-2.35467		15145	b1022	-0.432763	-2.60296			15145	b1022	-0.310445	-1.81261		15145	b1022	-0.552645	-3.15748		15145	b1022	-0.469676	-2.6498			15145	b1022	-0.393749	-2.50821		15145	b1022	-0.428689	-2.46425		15145	b1022	-0.478321	-2.8055
15146	b1023	-0.418563	-1.92912		15146	b1023	-0.472687	-2.16635		15146	b1023	-0.339825	-1.78968			15146	b1023	-0.353753	-1.57678		15146	b1023	-0.532505	-2.68355		15146	b1023	-0.480999	-2.49871			15146	b1023	-0.538694	-2.64683		15146	b1023	-0.348616	-1.75958		15146	b1023	-0.400499	-2.03745
15147	b1024	-0.109438	-0.849428		15147	b1024	-0.0920943	-0.724464		15147	b1024	-0.115618	-0.883378			15147	b1024	-0.0984725	-0.761365		15147	b1024	-0.138747	-1.0397		15147	b1024	-0.146984	-1.13588			15147	b1024	-0.10998	-0.845994		15147	b1024	-0.150999	-1.16033		15147	b1024	-0.145541	-1.113
15152	b1029	-0.181037	-0.422745		15152	b1029	-0.160021	-0.363693		15152	b1029	-0.0657222	-0.213176			15152	b1029	-0.0139992	-0.0386992		15152	b1029	-0.0982239	-0.279056		15152	b1029	-0.231458	-0.602999			15152	b1029	-0.150013	-0.443832		15152	b1029	-0.0336839	-0.0810618		15152	b1029	-0.242505	-0.576372
15155	b1033	-0.191253	-1.05261		15155	b1033	-0.221796	-1.12838		15155	b1033	-0.155553	-0.839083			15155	b1033	-0.00358561	-0.019069		15155	b1033	-0.172006	-0.840483		15155	b1033	-0.304329	-1.51241			15155	b1033	-0.121211	-0.740374		15155	b1033	-0.264665	-1.43651		15155	b1033	-0.313113	-1.56499
15156	b1034	-0.114624	-0.603619		15156	b1034	-0.0325	-0.147713		15156	b1034	0.0479012	0.241489			15156	b1034	-0.178564	-0.925781		15156	b1034	-0.178452	-0.942649		15156	b1034	-0.112128	-0.522069			15156	b1034	-0.116094	-0.562825		15156	b1034	-0.149608	-0.833046		15156	b1034	-0.154009	-0.850112
15157	b1035	0.385409	1.81059		15157	b1035	0.434956	1.82692		15157	b1035	0.402311	1.63325			15157	b1035	0.384644	1.65041		15157	b1035	0.408551	1.94001		15157	b1035	0.409309	1.72667			15157	b1035	0.543266	2.47559		15157	b1035	0.384231	1.52456		15157	b1035	0.337341	1.61966
15158	b1036	-0.138524	-0.893225		15158	b1036	-0.138496	-0.657398		15158	b1036	-0.125734	-0.771421			15158	b1036	0.00028857	0.00152983		15158	b1036	-0.259776	-1.28116		15158	b1036	-0.163765	-0.960173			15158	b1036	-0.183752	-1.18516		15158	b1036	-0.209093	-1.18657		15158	b1036	-0.207858	-1.13011
15159	b1037	0.0134659	0.0877726		15159	b1037	-0.0562683	-0.333759		15159	b1037	-0.0166515	-0.104525			15159	b1037	0.118064	0.735295		15159	b1037	-0.0400338	-0.254173		15159	b1037	-0.0162604	-0.105937			15159	b1037	-0.0113548	-0.0682861		15159	b1037	-0.0259275	-0.164394		15159	b1037	0.00447289	0.0270635
15160	b1038	-0.0802352	-0.263778		15160	b1038	-0.202592	-0.515858		15160	b1038	-0.306532	-0.988968			15160	b1038	-0.222425	-0.633922		15160	b1038	-0.242183	-0.74529		15160	b1038	-0.171245	-0.496596			15160	b1038	-0.416709	-1.0929		15160	b1038	0.0532458	0.140347		15160	b1038	-0.13976	-0.397773
15161	b1039	-0.236322	-1.09073		15161	b1039	-0.119482	-0.516524		15161	b1039	-0.191173	-0.828873			15161	b1039	-0.0287985	-0.125538		15161	b1039	-0.105241	-0.470465		15161	b1039	-0.315211	-1.33909			15161	b1039	-0.197467	-0.902235		15161	b1039	-0.170966	-0.796918		15161	b1039	-0.157236	-0.697193
15163	b1041	-0.0308822	-0.175289		15163	b1041	0.0663187	0.33454		15163	b1041	0.0154446	0.0830904			15163	b1041	0.0222752	0.0840752		15163	b1041	-0.0318527	-0.17578		15163	b1041	-0.0379624	-0.189249			15163	b1041	-0.329885	-1.44467		15163	b1041	0.162607	0.935988		15163	b1041	-0.152811	-0.80274
15164	b1042	0.0569655	0.306243		15164	b1042	0.0632274	0.325181		15164	b1042	0.0581975	0.270641			15164	b1042	0.100979	0.465368		15164	b1042	-0.0378015	-0.183909		15164	b1042	0.0753259	0.338075			15164	b1042	0.0745201	0.358477		15164	b1042	-0.0222752	-0.100248		15164	b1042	0.0658253	0.315704
15165	b1043	0.000230734	0.00130388		15165	b1043	-0.0629155	-0.375148		15165	b1043	-0.118934	-0.75571			15165	b1043	0.0389844	0.249608		15165	b1043	-0.0886231	-0.531915		15165	b1043	-0.130038	-0.752617			15165	b1043	-0.0642783	-0.381727		15165	b1043	-0.102059	-0.695831		15165	b1043	-0.0617853	-0.363335
15166	b1044	-0.315874	-1.26157		15166	b1044	-0.3907	-1.70054		15166	b1044	-0.215943	-0.84307			15166	b1044	-0.205206	-0.783649		15166	b1044	-0.223861	-0.962315		15166	b1044	-0.332529	-1.35196			15166	b1044	-0.27641	-1.03469		15166	b1044	-0.216058	-0.999473		15166	b1044	-0.279888	-1.13309
15167	b1045	0.0896867	0.384027		15167	b1045	0.237344	0.934159		15167	b1045	0.070223	0.305422			15167	b1045	0.243465	1.13524		15167	b1045	0.133038	0.543199		15167	b1045	0.148081	0.650628			15167	b1045	0.149997	0.70352		15167	b1045	0.251905	1.20005		15167	b1045	0.231819	1.16829
15168	b1046	0.00268493	0.0139247		15168	b1046	-0.0213107	-0.117674		15168	b1046	0.090252	0.438079			15168	b1046	0.00418031	0.0216936		15168	b1046	-0.112966	-0.634776		15168	b1046	-0.0325935	-0.173862			15168	b1046	-0.0126596	-0.0630761		15168	b1046	-0.0233872	-0.11919		15168	b1046	-0.0860311	-0.432982
15169	b1047	-0.285913	-1.62098		15169	b1047	-0.248003	-1.47675		15169	b1047	-0.342739	-1.8401			15169	b1047	-0.253699	-1.42925		15169	b1047	-0.154814	-0.814431		15169	b1047	-0.307275	-1.73422			15169	b1047	-0.373361	-2.01427		15169	b1047	-0.219762	-1.24395		15169	b1047	-0.174388	-0.970141
15170	b1048	-0.0228687	-0.0812429		15170	b1048	-0.0856684	-0.281238		15170	b1048	0.127323	0.466653			15170	b1048	-0.154863	-0.556307		15170	b1048	-0.120299	-0.405522		15170	b1048	-0.120145	-0.462294			15170	b1048	0.000331884	0.00110788		15170	b1048	-0.080977	-0.325526		15170	b1048	-0.0679208	-0.245801
15171	b1049	-0.281566	-1.65076		15171	b1049	-0.139006	-0.78673		15171	b1049	-0.275818	-1.4136			15171	b1049	-0.197484	-1.12913		15171	b1049	-0.345249	-1.78718		15171	b1049	-0.231052	-1.20445			15171	b1049	-0.220968	-1.08931		15171	b1049	-0.332786	-1.84962		15171	b1049	-0.225953	-1.26325
15175	b1053	-0.0426469	-0.226032		15175	b1053	-0.056744	-0.306418		15175	b1053	-0.0700608	-0.406048			15175	b1053	-0.13489	-0.775794		15175	b1053	-0.0152231	-0.0939714		15175	b1053	-0.12118	-0.7068			15175	b1053	-0.20263	-1.08651		15175	b1053	-0.075676	-0.413062		15175	b1053	-0.00559475	-0.0314214
15177	b1055	-0.374816	-1.72588		15177	b1055	-0.21584	-0.903759		15177	b1055	-0.0904715	-0.390572			15177	b1055	-0.239481	-1.19078		15177	b1055	-0.23838	-1.08005		15177	b1055	-0.19335	-1.02631			15177	b1055	-0.349313	-1.4392		15177	b1055	-0.14339	-0.62827		15177	b1055	-0.179612	-0.743673
15178	b1056	0.267415	1.71685		15178	b1056	0.342288	2.05714		15178	b1056	0.416447	2.63696			15178	b1056	0.293756	1.96534		15178	b1056	0.356094	2.45878		15178	b1056	0.362488	2.37904			15178	b1056	0.257026	1.51181		15178	b1056	0.414886	2.54334		15178	b1056	0.314858	2.01312
15179	b1057	-0.00568886	-0.0262694		15179	b1057	0.0784643	0.342692		15179	b1057	-0.0832666	-0.365587			15179	b1057	0.0306959	0.133264		15179	b1057	-0.0289225	-0.126692		15179	b1057	-0.0873126	-0.341212			15179	b1057	-0.224982	-0.954245		15179	b1057	-0.00942594	-0.0417867		15179	b1057	0.0168203	0.0839824
15181	b1059	0.0468379	0.333604		15181	b1059	0.185162	1.33519		15181	b1059	0.231237	1.75836			15181	b1059	0.0996865	0.744363		15181	b1059	0.158241	1.18196		15181	b1059	0.124168	0.930181			15181	b1059	0.0554676	0.399616		15181	b1059	0.13609	1.02433		15181	b1059	0.122657	0.906855
15182	b1060	-0.407139	-1.25708		15182	b1060	-0.500315	-1.25513		15182	b1060	-0.454503	-1.25525			15182	b1060	-0.333056	-1.17439		15182	b1060	-0.763797	-2.07075		15182	b1060	-0.563484	-1.60259			15182	b1060	-0.558288	-1.43239		15182	b1060	-0.600827	-1.78541		15182	b1060	-0.523667	-1.57511
15183	b1061	0.10916	0.699688		15183	b1061	0.0784682	0.488669		15183	b1061	0.105824	0.707356			15183	b1061	0.0814727	0.529433		15183	b1061	0.0700067	0.417059		15183	b1061	0.107909	0.730845			15183	b1061	0.12208	0.549334		15183	b1061	0.108188	0.634297		15183	b1061	0.0450404	0.302264
15184	b1062	0.0083055	0.0379736		15184	b1062	0.339224	1.74661		15184	b1062	-0.228215	-1.09301			15184	b1062	-0.187603	-0.881814		15184	b1062	-0.252997	-1.08293		15184	b1062	-0.000774144	-0.00370152			15184	b1062	0.168077	0.853857		15184	b1062	0.0809642	0.388758		15184	b1062	-0.0351944	-0.158941
15186	b1064	0.199323	0.602285		15186	b1064	0.187209	0.691382		15186	b1064	0.0323835	0.0976674			15186	b1064	0.00474403	0.0144615		15186	b1064	0.0630815	0.177925		15186	b1064	0.0143736	0.0505564			15186	b1064	-0.0260485	-0.0924523		15186	b1064	0.145419	0.436686		15186	b1064	0.0696924	0.195955
15187	b1065	-0.0894763	-0.326712		15187	b1065	-0.131929	-0.492555		15187	b1065	-0.026603	-0.106683			15187	b1065	-0.0875663	-0.282042		15187	b1065	-0.202068	-0.738761		15187	b1065	-0.0934306	-0.335211			15187	b1065	-0.17773	-0.711728		15187	b1065	-0.158643	-0.682661		15187	b1065	-0.137146	-0.496464
15188	b1066	0.134927	0.747784		15188	b1066	0.224722	1.24622		15188	b1066	0.247816	1.4235			15188	b1066	0.262261	1.4171		15188	b1066	0.247932	1.35417		15188	b1066	0.117389	0.681299			15188	b1066	0.122749	0.618061		15188	b1066	0.229951	1.32328		15188	b1066	0.261232	1.50482
15189	b1067	-0.202966	-0.574042		15189	b1067	-0.241587	-0.698217		15189	b1067	-0.135218	-0.301686			15189	b1067	0.0241501	0.0706341		15189	b1067	-0.142919	-0.378888		15189	b1067	-0.0149751	-0.0424733			15189	b1067	-0.0873299	-0.198401		15189	b1067	-0.0142505	-0.0355582		15189	b1067	-0.159974	-0.387273
15190	b1068	0.22188	1.12847		15190	b1068	0.162345	0.772093		15190	b1068	0.306805	1.52854			15190	b1068	0.186637	0.91934		15190	b1068	0.225859	1.11061		15190	b1068	0.229927	1.09241			15190	b1068	0.21499	0.975743		15190	b1068	0.204784	1.02173		15190	b1068	0.261584	1.24429
15194	b1072	-0.0957727	-0.441968		15194	b1072	-0.284971	-1.25716		15194	b1072	-0.106806	-0.479337			15194	b1072	-0.267892	-1.10227		15194	b1072	0.0420694	0.216764		15194	b1072	-0.1345	-0.69264			15194	b1072	-0.0802334	-0.330754		15194	b1072	-0.0288459	-0.13013		15194	b1072	-0.0501067	-0.245615
15195	b1073	0.3294	1.6631		15195	b1073	0.230827	1.14227		15195	b1073	0.324663	1.582			15195	b1073	0.202686	0.984785		15195	b1073	0.234196	1.173		15195	b1073	0.294662	1.60875			15195	b1073	0.290067	1.31286		15195	b1073	0.313548	1.41824		15195	b1073	0.227483	1.0169
15197	b1075	0.295229	0.642327		15197	b1075	0.202404	0.532293		15197	b1075	0.311904	0.733162			15197	b1075	0.0889648	0.192877		15197	b1075	0.0650635	0.16565		15197	b1075	0.389373	0.86489			15197	b1075	0.161137	0.355179		15197	b1075	0.163025	0.343707		15197	b1075	0.258769	0.619178
15198	b1076	-0.252565	-1.26867		15198	b1076	-0.276274	-1.52599		15198	b1076	-0.19919	-1.10937			15198	b1076	-0.264342	-1.44358		15198	b1076	-0.284643	-1.43277		15198	b1076	-0.206298	-1.12321			15198	b1076	-0.460294	-2.37819		15198	b1076	-0.209465	-1.17757		15198	b1076	-0.179907	-1.06921
15199	b1077	-0.0203612	-0.10923		15199	b1077	0.0116651	0.0655686		15199	b1077	-0.0207173	-0.119455			15199	b1077	-0.0200007	-0.113777		15199	b1077	-0.128004	-0.792409		15199	b1077	0.00753555	0.0441015			15199	b1077	-0.137468	-0.634734		15199	b1077	-0.0197167	-0.127494		15199	b1077	-0.0810599	-0.441931
15200	b1078	-0.0573419	-0.319935		15200	b1078	-0.110653	-0.615691		15200	b1078	-0.0604879	-0.373666			15200	b1078	-0.152178	-0.788854		15200	b1078	-0.0852048	-0.453552		15200	b1078	0.0688132	0.359286			15200	b1078	-0.113155	-0.579645		15200	b1078	-0.148724	-0.797525		15200	b1078	0.0020439	0.0111896
15201	b1079	0.265119	0.727653		15201	b1079	0.0812724	0.256622		15201	b1079	0.156529	0.458615			15201	b1079	0.0979594	0.308285		15201	b1079	0.0738838	0.288067		15201	b1079	0.216252	0.637983			15201	b1079	0.130526	0.383405		15201	b1079	0.342304	1.0692		15201	b1079	0.163727	0.420628
15202	b1080	-0.210146	-0.960032		15202	b1080	-0.242643	-1.13856		15202	b1080	-0.144853	-0.666963			15202	b1080	-0.241687	-1.17808		15202	b1080	-0.18377	-0.921244		15202	b1080	-0.234696	-1.00182			15202	b1080	-0.264918	-1.04571		15202	b1080	-0.232696	-1.06955		15202	b1080	-0.277104	-1.27432
15203	b1081	-0.204985	-1.30031		15203	b1081	-0.405969	-2.42954		15203	b1081	-0.190836	-1.05459			15203	b1081	-0.319934	-1.98213		15203	b1081	-0.329505	-1.58219		15203	b1081	-0.173494	-1.07027			15203	b1081	-0.225294	-1.20619		15203	b1081	-0.203713	-1.16303		15203	b1081	-0.113675	-0.709057
15204	b1082	-0.0623644	-0.31666		15204	b1082	-0.0422142	-0.220858		15204	b1082	-0.0508588	-0.246089			15204	b1082	-0.0738588	-0.35978		15204	b1082	-0.0302357	-0.145877		15204	b1082	-0.0368892	-0.200656			15204	b1082	-0.231898	-1.11068		15204	b1082	-0.0342533	-0.174691		15204	b1082	-0.0859808	-0.378555
15205	b1083	-0.021692	-0.0816679		15205	b1083	0.333283	1.30895		15205	b1083	0.197724	0.781467			15205	b1083	-0.00976854	-0.033574		15205	b1083	0.252577	0.850344		15205	b1083	-0.0322486	-0.121667			15205	b1083	-0.0944004	-0.419508		15205	b1083	-0.01721	-0.063857		15205	b1083	0.0999451	0.3563
15208	b1086	-0.337041	-1.26692		15208	b1086	-0.465836	-1.76526		15208	b1086	-0.6602	-2.30759			15208	b1086	-0.484373	-1.69551		15208	b1086	-0.35942	-1.28646		15208	b1086	-0.381978	-1.21031			15208	b1086	-0.644028	-2.37297		15208	b1086	-0.306975	-0.943956		15208	b1086	-0.385482	-1.35525
15209	b1087	0.0172967	0.071597		15209	b1087	0.0218087	0.104918		15209	b1087	-0.0870455	-0.373306			15209	b1087	-0.132781	-0.592726		15209	b1087	0.00676697	0.0312444		15209	b1087	-0.123244	-0.52185			15209	b1087	-0.159094	-0.714126		15209	b1087	-0.10704	-0.46065		15209	b1087	-0.128278	-0.561001
15210	b1088	-0.5318	-1.91778		15210	b1088	-0.399842	-1.63243		15210	b1088	-0.540822	-1.98611			15210	b1088	-0.342083	-1.39126		15210	b1088	-0.273414	-1.09384		15210	b1088	-0.434348	-1.66211			15210	b1088	-0.56939	-2.27432		15210	b1088	-0.553019	-1.95239		15210	b1088	-0.612497	-2.39532
15212	b1090	0.281111	0.900743		15212	b1090	0.365555	1.15631		15212	b1090	0.448852	1.64574			15212	b1090	0.320867	1.14149		15212	b1090	0.198815	0.658836		15212	b1090	0.304406	1.13139			15212	b1090	0.187296	0.629201		15212	b1090	0.318257	1.11668		15212	b1090	0.364422	1.37676
15217	b1095	0.13377	0.721759		15217	b1095	0.427999	2.37466		15217	b1095	0.699157	3.69324			15217	b1095	0.155512	0.873165		15217	b1095	0.176177	0.865252		15217	b1095	0.034835	0.17812			15217	b1095	-0.057951	-0.288401		15217	b1095	0.486915	2.59961		15217	b1095	0.567922	2.80566
15218	b1096	0.214722	0.63606		15218	b1096	0.114824	0.322834		15218	b1096	0.195329	0.614833			15218	b1096	0.0674195	0.224934		15218	b1096	0.187337	0.586057		15218	b1096	0.0724759	0.209306			15218	b1096	0.0173555	0.0569208		15218	b1096	0.0928665	0.273875		15218	b1096	0.151385	0.486507
15219	b1097	-0.0075525	-0.0328086		15219	b1097	0.015021	0.0736576		15219	b1097	-0.206597	-0.986375			15219	b1097	-0.200478	-1.01009		15219	b1097	-0.245462	-1.15355		15219	b1097	-0.640984	-2.93501			15219	b1097	0.0427772	0.191416		15219	b1097	0.0636919	0.325257		15219	b1097	0.16435	0.711159
15222	b1100	-0.131464	-0.753992		15222	b1100	-0.268924	-1.48634		15222	b1100	-0.0938209	-0.533294			15222	b1100	-0.0234267	-0.13072		15222	b1100	-0.113479	-0.668481		15222	b1100	-0.1411	-0.770788			15222	b1100	-0.18544	-1.02886		15222	b1100	-0.125039	-0.708115		15222	b1100	-0.146464	-0.839532
15223	b1101	-0.107579	-0.72787		15223	b1101	-0.065218	-0.433015		15223	b1101	-0.102447	-0.738598			15223	b1101	-0.130993	-0.934172		15223	b1101	-0.0322432	-0.22427		15223	b1101	-0.0434618	-0.293239			15223	b1101	-0.27258	-1.7245		15223	b1101	-0.0753549	-0.501975		15223	b1101	-0.0407479	-0.282056
15224	b1102	-0.157549	-1.03172		15224	b1102	-0.222757	-1.45863		15224	b1102	-0.170271	-1.11704			15224	b1102	-0.13466	-0.906805		15224	b1102	-0.160872	-1.09497		15224	b1102	-0.0984096	-0.640033			15224	b1102	-0.274928	-1.74269		15224	b1102	-0.152543	-1.0273		15224	b1102	-0.148364	-0.964307
15227	b1105	-0.236653	-0.713587		15227	b1105	-0.48987	-1.60348		15227	b1105	-0.944404	-2.77056			15227	b1105	-0.485424	-1.24454		15227	b1105	-0.951652	-2.51366		15227	b1105	-1.03839	-3.6752			15227	b1105	-0.461225	-1.41658		15227	b1105	-0.584114	-1.54388		15227	b1105	-0.444614	-1.08118
15228	b1106	-0.532678	-3.05076		15228	b1106	-0.383688	-2.15369		15228	b1106	-0.624084	-3.41725			15228	b1106	-0.583706	-2.55629		15228	b1106	-0.587218	-2.58336		15228	b1106	-0.526515	-2.34909			15228	b1106	-0.635327	-3.42527		15228	b1106	-0.364543	-1.85401		15228	b1106	-0.510744	-2.33394
15231	b1109	-0.769288	-3.01124		15231	b1109	-0.785836	-3.01396		15231	b1109	-0.859691	-3.21393			15231	b1109	-1.02278	-3.74583		15231	b1109	-0.877321	-3.17233		15231	b1109	-0.723771	-2.83644			15231	b1109	-0.651529	-2.23474		15231	b1109	-0.678744	-2.21668		15231	b1109	-0.665802	-2.70474
15232	b1110	0.147189	0.98369		15232	b1110	0.0789407	0.445572		15232	b1110	0.152044	0.914826			15232	b1110	0.190654	1.21882		15232	b1110	0.157322	1.00355		15232	b1110	0.231034	1.60968			15232	b1110	0.0449572	0.25613		15232	b1110	0.22369	1.27164		15232	b1110	0.206389	1.43996
15233	b1111	-0.28168	-0.439599		15233	b1111	-0.54977	-0.867493		15233	b1111	-0.361433	-0.615042			15233	b1111	-0.258202	-0.411481		15233	b1111	-0.280943	-0.465109		15233	b1111	-0.508883	-0.956007			15233	b1111	-0.340782	-0.573926		15233	b1111	-0.369048	-0.612691		15233	b1111	-0.237313	-0.402423
15235	b1113	-0.132947	-0.667207		15235	b1113	-0.210647	-1.03986		15235	b1113	-0.154109	-0.737102			15235	b1113	-0.285804	-1.34751		15235	b1113	-0.178404	-0.723204		15235	b1113	-0.142669	-0.679908			15235	b1113	-0.302773	-1.56662		15235	b1113	-0.128017	-0.630941		15235	b1113	-0.127995	-0.761465
15236	b1114	0.0765462	0.453096		15236	b1114	0.0907865	0.544972		15236	b1114	-0.0236748	-0.136879			15236	b1114	0.108163	0.670304		15236	b1114	-0.023671	-0.131367		15236	b1114	0.139548	0.842062			15236	b1114	-0.00220332	-0.012392		15236	b1114	0.188521	1.15475		15236	b1114	0.191943	1.24432
15237	b1115	-0.0793308	-0.448878		15237	b1115	-0.138542	-0.740973		15237	b1115	-0.215734	-1.20969			15237	b1115	-0.108683	-0.656412		15237	b1115	-0.168627	-1.07847		15237	b1115	-0.0873136	-0.481843			15237	b1115	-0.205063	-1.03407		15237	b1115	-0.00945563	-0.0479355		15237	b1115	-0.123075	-0.638474
15241	b1119	0.0322374	0.108245		15241	b1119	-0.0284736	-0.100145		15241	b1119	-0.0222332	-0.0738721			15241	b1119	0.0247132	0.091188		15241	b1119	-0.0550883	-0.188984		15241	b1119	0.000793153	0.00276443			15241	b1119	-0.0394301	-0.128624		15241	b1119	-0.0613875	-0.216526		15241	b1119	0.0332108	0.108666
15242	b1120	0.0657583	0.294383		15242	b1120	-0.137885	-0.502647		15242	b1120	-0.142455	-0.583583			15242	b1120	0.0963259	0.433912		15242	b1120	-0.0718945	-0.303762		15242	b1120	-0.011434	-0.045327			15242	b1120	-0.00574647	-0.0230742		15242	b1120	0.0308613	0.116847		15242	b1120	0.0702931	0.327732
15244	b1122	0.242014	1.40509		15244	b1122	0.339763	2.08758		15244	b1122	0.302286	1.71222			15244	b1122	0.15967	0.957637		15244	b1122	0.389608	2.31551		15244	b1122	0.271063	1.7043			15244	b1122	0.183925	1.03421		15244	b1122	0.379719	2.37356		15244	b1122	0.322331	1.88734
15245	b1123	-0.124713	-0.504452		15245	b1123	-0.188624	-0.769055		15245	b1123	-0.137552	-0.509148			15245	b1123	-0.306936	-1.29784		15245	b1123	0.0363483	0.162038		15245	b1123	-0.0650837	-0.243768			15245	b1123	-0.407916	-1.65149		15245	b1123	-0.102368	-0.403829		15245	b1123	-0.115853	-0.486541
15246	b1124	0.11611	0.326317		15246	b1124	-0.0667138	-0.192382		15246	b1124	0.166133	0.474689			15246	b1124	-0.106779	-0.31538		15246	b1124	0.148661	0.455643		15246	b1124	-0.015957	-0.0434853			15246	b1124	-0.0782735	-0.194129		15246	b1124	0.229678	0.665586		15246	b1124	0.312173	0.823242
15247	b1125	-0.152449	-0.504856		15247	b1125	-0.128504	-0.404374		15247	b1125	-0.00126363	-0.00505053			15247	b1125	-0.208686	-0.611487		15247	b1125	-0.0269852	-0.111155		15247	b1125	-0.0728341	-0.295999			15247	b1125	0.0465085	0.134027		15247	b1125	0.0413662	0.133685		15247	b1125	-0.0474804	-0.121379
15248	b1126	0.237718	0.879703		15248	b1126	0.169765	0.683358		15248	b1126	0.270401	1.06028			15248	b1126	-0.033615	-0.133754		15248	b1126	0.201961	0.716714		15248	b1126	0.197053	0.756394			15248	b1126	-0.198084	-0.770573		15248	b1126	0.273088	1.00415		15248	b1126	0.31893	1.08107
15249	b1127	-0.00701859	-0.0306333		15249	b1127	-0.108903	-0.507809		15249	b1127	-0.157339	-0.681991			15249	b1127	-0.135965	-0.658162		15249	b1127	-0.013341	-0.0636863		15249	b1127	-0.0459514	-0.208768			15249	b1127	-0.272429	-0.825505		15249	b1127	-0.135092	-0.596282		15249	b1127	-0.0826686	-0.363882
15250	b1128	-0.111587	-0.492015		15250	b1128	0.00184219	0.00822812		15250	b1128	0.0578099	0.241518			15250	b1128	-0.136681	-0.640755		15250	b1128	0.100369	0.520171		15250	b1128	0.0959316	0.485377			15250	b1128	-0.106395	-0.546843		15250	b1128	-0.0385818	-0.164348		15250	b1128	0.0405268	0.182404
15254	b1132	-0.516761	-1.75029		15254	b1132	-0.49506	-1.56607		15254	b1132	-0.535461	-1.63019			15254	b1132	-0.704817	-3.19544		15254	b1132	-0.503416	-1.75543		15254	b1132	-0.721029	-1.84241			15254	b1132	-0.780257	-2.0546		15254	b1132	-0.595547	-2.23948		15254	b1132	-0.510049	-1.92581
15257	b1135	0.196938	0.884514		15257	b1135	0.11576	0.550678		15257	b1135	0.198467	1.00198			15257	b1135	0.0249899	0.128252		15257	b1135	0.23959	1.22636		15257	b1135	0.0832997	0.391102			15257	b1135	0.109777	0.525687		15257	b1135	0.235669	1.22117		15257	b1135	0.177408	0.949165
15261	b1139	-0.850325	-2.6139		15261	b1139	-1.0167	-2.81197		15261	b1139	-0.682697	-2.53774			15261	b1139	-0.672834	-1.98045		15261	b1139	-0.742015	-2.31708		15261	b1139	-0.929466	-2.72267			15261	b1139	-0.420299	-1.38633		15261	b1139	-0.85558	-2.5263		15261	b1139	-0.77149	-2.23852
15262	b1140	0.0294809	0.187316		15262	b1140	0.099978	0.693179		15262	b1140	0.120063	0.798873			15262	b1140	0.0880498	0.590606		15262	b1140	0.0968097	0.673276		15262	b1140	0.165366	1.11083			15262	b1140	0.0507131	0.333068		15262	b1140	0.122528	0.830066		15262	b1140	0.0964288	0.647831
15263	b1141	0.191375	0.454539		15263	b1141	0.228801	0.417221		15263	b1141	0.252745	0.515481			15263	b1141	0.35362	0.831769		15263	b1141	0.15505	0.266756		15263	b1141	0.223791	0.449933			15263	b1141	0.1435	0.316279		15263	b1141	0.345094	0.677384		15263	b1141	0.13917	0.27649
15269	b1147	-0.166977	-0.350621		15269	b1147	-0.204375	-0.411239		15269	b1147	-0.211428	-0.38553			15269	b1147	-0.174873	-0.326794		15269	b1147	-0.00543642	-0.00968209		15269	b1147	-0.206981	-0.378762			15269	b1147	-0.0558399	-0.0956424		15269	b1147	-0.0656747	-0.148463		15269	b1147	-0.000548026	-0.00125086
15273	b1151	-0.122864	-0.207184		15273	b1151	-0.337265	-0.598658		15273	b1151	-0.243226	-0.498522			15273	b1151	-0.00187682	-0.00328132		15273	b1151	-0.0592145	-0.149744		15273	b1151	-0.400832	-0.635292			15273	b1151	-0.205692	-0.338959		15273	b1151	-0.0939045	-0.126542		15273	b1151	-0.0250228	-0.0402812
15274	b1152	-0.533968	-1.52799		15274	b1152	-0.442921	-1.49205		15274	b1152	-0.615808	-1.50928			15274	b1152	-0.550699	-1.75706		15274	b1152	-0.559422	-1.75642		15274	b1152	-0.51455	-1.4639			15274	b1152	-0.611599	-1.64701		15274	b1152	-0.633184	-1.63746		15274	b1152	-0.329062	-1.10264
15275	b1153	-0.107315	-0.210343		15275	b1153	-0.018156	-0.0356661		15275	b1153	0.0633938	0.165176			15275	b1153	-0.0549196	-0.145986		15275	b1153	-0.0329707	-0.0624738		15275	b1153	-0.0539596	-0.105979			15275	b1153	-0.032783	-0.0720908		15275	b1153	0.0242951	0.0480443		15275	b1153	0.109151	0.265272
15276	b1154	0.0255989	0.115202		15276	b1154	-0.0815547	-0.405866		15276	b1154	0.0963924	0.466342			15276	b1154	-0.0868635	-0.42622		15276	b1154	-0.156606	-0.66501		15276	b1154	-0.101817	-0.510148			15276	b1154	-0.154236	-0.76948		15276	b1154	-0.0452306	-0.226734		15276	b1154	0.0501324	0.23538
15277	b1155	0.312794	1.07707		15277	b1155	0.117215	0.34902		15277	b1155	0.00954259	0.0275149			15277	b1155	0.29861	0.861673		15277	b1155	0.461321	1.77709		15277	b1155	0.51744	1.47147			15277	b1155	0.276755	0.832943		15277	b1155	0.401278	1.45485		15277	b1155	0.403492	1.32981
15278	b1156	-0.178638	-0.615105		15278	b1156	-0.0757099	-0.225549		15278	b1156	0.0131391	0.0481817			15278	b1156	0.168325	0.613927		15278	b1156	-0.0403316	-0.131827		15278	b1156	0.0703201	0.220715			15278	b1156	-0.134944	-0.458967		15278	b1156	0.0393367	0.141279		15278	b1156	-0.0974413	-0.347306
15280	b1158	-0.0794109	-0.395956		15280	b1158	-0.0507801	-0.208068		15280	b1158	-0.0527135	-0.233195			15280	b1158	0.0535345	0.223278		15280	b1158	0.0175567	0.0955823		15280	b1158	-0.0694799	-0.335444			15280	b1158	-0.231283	-1.06371		15280	b1158	0.0723229	0.383011		15280	b1158	0.000236617	0.00127555
15284	b1162	-0.433246	-1.4846		15284	b1162	-0.595137	-2.43098		15284	b1162	-0.387964	-1.52324			15284	b1162	-0.447696	-1.74999		15284	b1162	-0.391916	-1.47259		15284	b1162	-0.22345	-0.942179			15284	b1162	-0.18672	-0.850986		15284	b1162	-0.434373	-1.921		15284	b1162	-0.258895	-1.22253
15285	b1163	-0.679411	-2.29182		15285	b1163	-0.650751	-2.14917		15285	b1163	-0.752077	-2.72438			15285	b1163	-0.735502	-2.60322		15285	b1163	-0.889655	-3.8437		15285	b1163	-0.568893	-2.17817			15285	b1163	-0.630632	-2.228		15285	b1163	-0.516868	-1.85803		15285	b1163	-0.63437	-2.30497
15294	b1172	-0.0119114	-0.0389575		15294	b1172	0.0305733	0.102378		15294	b1172	-0.116549	-0.415147			15294	b1172	0.0324121	0.10819		15294	b1172	0.0672354	0.202103		15294	b1172	0.0791774	0.252629			15294	b1172	-0.0510439	-0.174641		15294	b1172	0.0314418	0.106388		15294	b1172	0.0628309	0.20125
15297	b1175	-0.537277	-1.65862		15297	b1175	-1.01241	-2.14944		15297	b1175	-0.774778	-2.60088			15297	b1175	-0.558241	-1.93859		15297	b1175	-0.668598	-2.18769		15297	b1175	-0.856456	-2.85245			15297	b1175	-0.470825	-0.911299		15297	b1175	-0.793453	-2.53297		15297	b1175	-0.903669	-2.8308
15299	b1177	0.0455241	0.176127		15299	b1177	-0.0146461	-0.0540729		15299	b1177	0.185568	0.764372			15299	b1177	0.00938644	0.0383161		15299	b1177	0.111113	0.460157		15299	b1177	0.266443	1.08685			15299	b1177	-0.0194232	-0.0645509		15299	b1177	0.366582	1.64173		15299	b1177	0.272949	1.03403
15300	b1178	-0.0659149	-0.293637		15300	b1178	0.0478371	0.222285		15300	b1178	0.038848	0.161298			15300	b1178	0.0938934	0.450641		15300	b1178	0.123278	0.617841		15300	b1178	0.068901	0.320314			15300	b1178	0.0517987	0.230334		15300	b1178	-0.0152703	-0.0675264		15300	b1178	-0.0274184	-0.125351
15302	b1180	0.012762	0.0475847		15302	b1180	-0.0317624	-0.142799		15302	b1180	0.0116792	0.044832			15302	b1180	0.134635	0.608659		15302	b1180	-0.114447	-0.514465		15302	b1180	0.103431	0.426713			15302	b1180	-0.032284	-0.121415		15302	b1180	-0.035118	-0.162404		15302	b1180	-0.0263203	-0.125833
15303	b1181	-0.415672	-2.17841		15303	b1181	-0.42166	-2.30847		15303	b1181	-0.51442	-2.53691			15303	b1181	-0.439874	-2.45293		15303	b1181	-0.488383	-2.71714		15303	b1181	-0.418471	-2.18897			15303	b1181	-0.501045	-2.50426		15303	b1181	-0.521801	-2.87257		15303	b1181	-0.428672	-2.30287
15306	b1184	0.113868	0.503192		15306	b1184	0.126749	0.619141		15306	b1184	0.185903	0.978915			15306	b1184	0.109756	0.507475		15306	b1184	0.124739	0.558322		15306	b1184	0.104245	0.450368			15306	b1184	0.146308	0.642257		15306	b1184	0.106324	0.469209		15306	b1184	0.177245	0.813486
15308	b1186	0.721113	2.88289		15308	b1186	0.571815	2.15026		15308	b1186	0.602938	2.37347			15308	b1186	0.567095	2.10532		15308	b1186	0.61839	2.45453		15308	b1186	0.563632	2.05741			15308	b1186	0.529804	1.93778		15308	b1186	0.693294	2.64813		15308	b1186	0.661887	2.49911
15309	b1187	-0.446767	-1.57753		15309	b1187	-0.333193	-1.18141		15309	b1187	-0.303415	-1.16274			15309	b1187	-0.530963	-1.65334		15309	b1187	-0.66183	-1.65934		15309	b1187	-0.652708	-2.23072			15309	b1187	-0.658496	-1.67321		15309	b1187	-0.345662	-1.09225		15309	b1187	-0.165415	-0.555857
15310	b1188	0.0242356	0.109273		15310	b1188	-0.0279713	-0.115032		15310	b1188	0.0117776	0.0466908			15310	b1188	-0.0238879	-0.0986503		15310	b1188	-0.013341	-0.059831		15310	b1188	-0.0175172	-0.0740625			15310	b1188	0.0246233	0.0986703		15310	b1188	0.0718446	0.313829		15310	b1188	0.20285	0.93389
15311	b1189	0.0134935	0.0680258		15311	b1189	0.141253	0.609187		15311	b1189	0.216906	1.01603			15311	b1189	0.139436	0.7585		15311	b1189	0.239011	1.48776		15311	b1189	0.188076	0.900242			15311	b1189	-0.0865358	-0.360004		15311	b1189	0.303233	1.36267		15311	b1189	0.205906	0.947163
15312	b1190	0.20658	0.846819		15312	b1190	0.13477	0.494065		15312	b1190	0.258669	0.897624			15312	b1190	0.126809	0.4794		15312	b1190	0.368965	1.31286		15312	b1190	0.372847	1.56991			15312	b1190	0.179601	0.572863		15312	b1190	0.413799	1.49511		15312	b1190	0.315195	1.27282
15313	b1191	-0.0435302	-0.269105		15313	b1191	0.0211397	0.133885		15313	b1191	-0.0533257	-0.322317			15313	b1191	-0.00796474	-0.0536377		15313	b1191	0.0194386	0.121297		15313	b1191	0.00580728	0.0366695			15313	b1191	-0.120011	-0.685148		15313	b1191	-0.0362811	-0.241069		15313	b1191	0.0617893	0.391553
15314	b1192	-1.79703	-5.4141		15314	b1192	-1.812	-6.36423		15314	b1192	-3.78469	-7.94473			15314	b1192	-2.22606	-6.23238		15314	b1192	-4.37528	-7.5541		15314	b1192	-5.15517	-9.43883			15314	b1192	-2.64464	-4.82769		15314	b1192	-5.0032	-9.16057		15314	b1192	-3.94696	-8.45595
15316	b1194	-0.0787217	-0.227356		15316	b1194	-5.42716e-05	-0.000231732		15316	b1194	-0.158655	-0.542012			15316	b1194	-0.236486	-0.983531		15316	b1194	0.110525	0.394423		15316	b1194	0.0139357	0.0562856			15316	b1194	-0.215665	-0.775728		15316	b1194	-0.095674	-0.307708		15316	b1194	0.0642772	0.283449
15317	b1195	-0.226985	-0.603391		15317	b1195	-0.311769	-0.810531		15317	b1195	-0.232349	-0.539657			15317	b1195	-0.23024	-0.851902		15317	b1195	-0.0533175	-0.143247		15317	b1195	-0.0307386	-0.0809031			15317	b1195	-0.243149	-0.778639		15317	b1195	-0.212277	-0.598519		15317	b1195	-0.107511	-0.305133
15319	b1197	0.111937	0.689476		15319	b1197	0.0337882	0.185915		15319	b1197	0.0379577	0.231791			15319	b1197	0.0626916	0.327889		15319	b1197	0.25798	1.33019		15319	b1197	0.0950673	0.528818			15319	b1197	0.11856	0.56032		15319	b1197	0.158529	0.954193		15319	b1197	0.0385591	0.193286
15320	b1198	-0.0966284	-0.402346		15320	b1198	0.0401417	0.158578		15320	b1198	0.0684172	0.262033			15320	b1198	-0.0513471	-0.147658		15320	b1198	0.0496832	0.200183		15320	b1198	0.0710513	0.306488			15320	b1198	0.120291	0.421946		15320	b1198	0.149604	0.617403		15320	b1198	0.190361	0.818339
15321	b1199	-0.39182	-0.885888		15321	b1199	-0.350224	-0.749156		15321	b1199	-0.255192	-0.603388			15321	b1199	-0.177638	-0.41903		15321	b1199	-0.157961	-0.370259		15321	b1199	-0.253039	-0.566383			15321	b1199	-0.426584	-0.908453		15321	b1199	-0.191985	-0.408159		15321	b1199	-0.116941	-0.246773
15322	b1200	-0.132352	-0.566099		15322	b1200	-0.216635	-0.836477		15322	b1200	-0.131928	-0.562506			15322	b1200	-0.168107	-0.642636		15322	b1200	-0.068195	-0.266025		15322	b1200	0.0392493	0.181333			15322	b1200	-0.263658	-0.899301		15322	b1200	0.123872	0.531036		15322	b1200	0.000862142	0.004083
15323	b1201	-0.190113	-0.901933		15323	b1201	-0.373258	-1.77303		15323	b1201	-0.144681	-0.695696			15323	b1201	-0.226522	-1.00786		15323	b1201	-0.128593	-0.607897		15323	b1201	-0.201009	-0.934986			15323	b1201	-0.0285469	-0.142905		15323	b1201	-0.257352	-1.12897		15323	b1201	-0.133087	-0.579825
15324	b1202	0.125873	0.910206		15324	b1202	0.0352357	0.259297		15324	b1202	-0.0217381	-0.15424			15324	b1202	0.112229	0.800409		15324	b1202	0.0574721	0.414342		15324	b1202	0.156299	1.11167			15324	b1202	0.0577041	0.410515		15324	b1202	0.151766	1.08377		15324	b1202	0.144723	1.04565
15328	b1206	0.089198	0.6178		15328	b1206	0.16826	1.11197		15328	b1206	0.0304638	0.194765			15328	b1206	0.0786101	0.512528		15328	b1206	0.111884	0.652401		15328	b1206	0.162073	1.11279			15328	b1206	0.0407345	0.258491		15328	b1206	0.148318	0.956359		15328	b1206	0.190088	1.25835
15335	b1213	0.0582443	0.192636		15335	b1213	0.246285	0.791011		15335	b1213	0.283719	0.835649			15335	b1213	0.147174	0.526576		15335	b1213	0.333207	1.17464		15335	b1213	0.212121	0.737486			15335	b1213	0.378781	1.30533		15335	b1213	0.258503	0.708355		15335	b1213	0.212725	0.617174
15336	b1214	0.0367912	0.128002		15336	b1214	0.116903	0.431669		15336	b1214	0.0364092	0.148751			15336	b1214	-0.0836467	-0.303586		15336	b1214	0.000163824	0.000664274		15336	b1214	0.184093	0.626689			15336	b1214	0.0332639	0.116185		15336	b1214	0.137842	0.522865		15336	b1214	0.136996	0.517034
15338	b1216	0.127245	0.782551		15338	b1216	0.158297	1.02769		15338	b1216	0.240001	1.50196			15338	b1216	0.181624	1.10844		15338	b1216	0.144654	0.97885		15338	b1216	0.241436	1.78417			15338	b1216	0.197309	1.33446		15338	b1216	0.242945	1.74093		15338	b1216	0.333041	2.02349
15340	b1218	-0.0988884	-0.294852		15340	b1218	-0.084468	-0.291436		15340	b1218	0.016294	0.0497011			15340	b1218	-0.0486863	-0.171196		15340	b1218	0.0762684	0.247125		15340	b1218	0.0110877	0.0285288			15340	b1218	0.00388054	0.0107896		15340	b1218	-0.123193	-0.309637		15340	b1218	0.0482717	0.149255
15341	b1219	0.061986	0.128874		15341	b1219	-0.0537956	-0.14501		15341	b1219	0.0278735	0.0585451			15341	b1219	0.122772	0.307112		15341	b1219	-0.0538249	-0.107429		15341	b1219	0.0460037	0.098212			15341	b1219	0.270582	0.698922		15341	b1219	0.0132553	0.0286006		15341	b1219	0.0985956	0.26513
15342	b1220	-0.0932693	-0.469552		15342	b1220	-0.191942	-0.984455		15342	b1220	-0.0192615	-0.102035			15342	b1220	-0.116363	-0.595977		15342	b1220	0.053288	0.27182		15342	b1220	0.0557183	0.300049			15342	b1220	0.141407	0.738879		15342	b1220	-0.0226965	-0.107657		15342	b1220	-0.0147245	-0.073506
15343	b1221	-0.274249	-0.756908		15343	b1221	-0.434155	-1.57972		15343	b1221	-0.286621	-0.943656			15343	b1221	-0.263394	-0.863229		15343	b1221	-0.228596	-0.632548		15343	b1221	-0.174978	-0.548188			15343	b1221	-0.163198	-0.425188		15343	b1221	-0.254654	-0.705055		15343	b1221	-0.307452	-0.973761
15344	b1222	0.000620582	0.00207135		15344	b1222	0.0389173	0.132727		15344	b1222	0.123786	0.420606			15344	b1222	0.0811769	0.306574		15344	b1222	0.00131862	0.00527551		15344	b1222	-0.00844144	-0.0295679			15344	b1222	-4.72505e-05	-0.00013046		15344	b1222	0.103083	0.273718		15344	b1222	0.118041	0.397403
15345	b1223	-0.0207684	-0.0792902		15345	b1223	-0.0497796	-0.176747		15345	b1223	-0.0280452	-0.108991			15345	b1223	-0.0442133	-0.202718		15345	b1223	0.115705	0.477228		15345	b1223	0.0616217	0.244006			15345	b1223	0.0423992	0.135949		15345	b1223	0.0558096	0.235481		15345	b1223	-0.00968183	-0.0448639
15346	b1224	-0.163769	-0.953706		15346	b1224	-0.197198	-1.14941		15346	b1224	-0.235041	-1.31383			15346	b1224	-0.169148	-1.02051		15346	b1224	-0.0556725	-0.335818		15346	b1224	-0.0407136	-0.227838			15346	b1224	-0.270794	-1.47149		15346	b1224	-0.101608	-0.616463		15346	b1224	-0.0745772	-0.426684
15347	b1225	0.332317	1.43233		15347	b1225	0.557054	2.33988		15347	b1225	0.451495	1.74387			15347	b1225	0.499903	2.11141		15347	b1225	0.50669	2.18999		15347	b1225	0.537638	1.99482			15347	b1225	0.483757	2.63026		15347	b1225	0.555409	2.12995		15347	b1225	0.586932	2.1207
15348	b1226	0.178929	0.867267		15348	b1226	0.0658425	0.254008		15348	b1226	0.0878484	0.382137			15348	b1226	0.105392	0.402028		15348	b1226	0.322637	1.45621		15348	b1226	0.273999	1.14168			15348	b1226	0.0090187	0.0299635		15348	b1226	0.0544098	0.218469		15348	b1226	0.185924	0.680419
15349	b1227	0.158197	0.497046		15349	b1227	-0.00255666	-0.00755291		15349	b1227	-0.0163794	-0.0471844			15349	b1227	0.0660945	0.199047		15349	b1227	0.313718	1.05194		15349	b1227	0.174832	0.50535			15349	b1227	0.271615	0.958557		15349	b1227	0.191058	0.633656		15349	b1227	0.131237	0.44546
15352	b1232	-0.662412	-3.09876		15352	b1232	-0.864468	-4.09807		15352	b1232	-1.24568	-5.03567			15352	b1232	-0.495119	-2.14554		15352	b1232	-0.648267	-2.44638		15352	b1232	-0.579003	-2.24402			15352	b1232	-0.482417	-1.82526		15352	b1232	-0.885254	-4.65511		15352	b1232	-1.1039	-4.96307
15353	b1233	0.174572	0.509574		15353	b1233	-0.00607253	-0.02023		15353	b1233	0.0337966	0.138521			15353	b1233	-0.0283204	-0.119947		15353	b1233	-0.0565297	-0.169299		15353	b1233	0.160871	0.506535			15353	b1233	0.0572546	0.183258		15353	b1233	0.219901	0.735615		15353	b1233	0.126735	0.428613
15354	b1234	-0.317747	-1.29955		15354	b1234	-0.181651	-0.722366		15354	b1234	-0.300255	-1.20558			15354	b1234	-0.151537	-0.634388		15354	b1234	-0.290094	-1.15624		15354	b1234	-0.299139	-1.11092			15354	b1234	-0.238256	-1.11706		15354	b1234	-0.249695	-1.04473		15354	b1234	-0.29912	-1.19169
15358	b1238	-0.440642	-1.41048		15358	b1238	-0.341794	-1.10342		15358	b1238	-0.556421	-2.04409			15358	b1238	-0.163345	-0.668224		15358	b1238	-0.378431	-1.49233		15358	b1238	-0.12739	-0.494821			15358	b1238	-0.394679	-1.29021		15358	b1238	-0.148426	-0.532633		15358	b1238	-0.320719	-1.15672
15361	b1241	-0.00199551	-0.013434		15361	b1241	-0.023788	-0.160448		15361	b1241	-0.085627	-0.507608			15361	b1241	-0.0206618	-0.137827		15361	b1241	0.00610601	0.0397882		15361	b1241	0.109387	0.689558			15361	b1241	0.0175703	0.113623		15361	b1241	-0.0416109	-0.26831		15361	b1241	0.0455926	0.290156
15362	b1242	-0.197372	-0.704234		15362	b1242	-0.284865	-0.805583		15362	b1242	-0.104436	-0.297489			15362	b1242	0.0312149	0.105945		15362	b1242	-0.0336558	-0.104911		15362	b1242	-0.000562337	-0.0014656			15362	b1242	-0.390572	-1.37157		15362	b1242	0.0568964	0.168887		15362	b1242	-0.0872315	-0.226837
15363	b1243	-0.0285643	-0.142513		15363	b1243	-0.0963599	-0.505966		15363	b1243	-0.186216	-1.00814			15363	b1243	-0.0271058	-0.158418		15363	b1243	0.0990722	0.603547		15363	b1243	0.0409053	0.235963			15363	b1243	-0.144727	-0.790066		15363	b1243	-0.0255145	-0.142086		15363	b1243	-0.109407	-0.569668
15364	b1244	0.0442147	0.222809		15364	b1244	-0.190173	-0.787885		15364	b1244	-0.0496674	-0.251074			15364	b1244	-0.044974	-0.214616		15364	b1244	0.102727	0.512236		15364	b1244	0.0616236	0.283994			15364	b1244	0.151505	0.709804		15364	b1244	0.0931699	0.435062		15364	b1244	-0.0185256	-0.0893725
15365	b1245	-0.0436994	-0.179175		15365	b1245	-0.104492	-0.448936		15365	b1245	-0.187574	-0.790269			15365	b1245	0.0178076	0.0828899		15365	b1245	0.0732852	0.334008		15365	b1245	0.0485804	0.206161			15365	b1245	-0.10678	-0.427062		15365	b1245	-0.018959	-0.0801728		15365	b1245	-0.105473	-0.473791
15367	b1247	-0.0102766	-0.0401382		15367	b1247	-0.0158821	-0.0590451		15367	b1247	-0.00810931	-0.0317407			15367	b1247	-0.00932042	-0.0359731		15367	b1247	0.21069	0.731125		15367	b1247	0.0624542	0.199713			15367	b1247	-0.018397	-0.0612283		15367	b1247	0.0840547	0.313262		15367	b1247	-0.02495	-0.0896354
15369	b1249	-0.105602	-0.480304		15369	b1249	-0.259779	-1.20034		15369	b1249	-0.275218	-1.30801			15369	b1249	-0.125817	-0.560442		15369	b1249	-0.453931	-1.54589		15369	b1249	-0.168032	-0.782136			15369	b1249	-0.0991273	-0.468133		15369	b1249	-0.296018	-1.20956		15369	b1249	-0.248035	-1.14751
15370	b1250	-0.137147	-0.474912		15370	b1250	-0.0941141	-0.346141		15370	b1250	-0.140819	-0.553932			15370	b1250	-0.0111081	-0.0489513		15370	b1250	0.0627801	0.272402		15370	b1250	0.0637299	0.26121			15370	b1250	-0.186968	-0.799396		15370	b1250	-0.141829	-0.611834		15370	b1250	-0.0324123	-0.12977
15371	b1251	-0.478411	-1.46044		15371	b1251	-0.410867	-1.50144		15371	b1251	-0.4489	-1.57875			15371	b1251	-0.508757	-1.62658		15371	b1251	-0.272178	-0.849738		15371	b1251	0.0010005	0.00412968			15371	b1251	0.014929	0.0401211		15371	b1251	-0.461166	-1.81354		15371	b1251	-0.312819	-0.91897
15373	b1253	0.126958	0.310862		15373	b1253	-0.0549979	-0.0934832		15373	b1253	-0.163327	-0.265621			15373	b1253	0.156056	0.265574		15373	b1253	-0.145323	-0.214491		15373	b1253	0.181112	0.31674			15373	b1253	0.214347	0.367738		15373	b1253	0.0529048	0.0908023		15373	b1253	0.0571507	0.108265
15375	b1255	-0.396708	-1.56984		15375	b1255	-0.142707	-0.638931		15375	b1255	-0.277924	-1.26415			15375	b1255	-0.290008	-1.27027		15375	b1255	-0.55701	-2.34014		15375	b1255	-0.362514	-1.46225			15375	b1255	-0.0945212	-0.42795		15375	b1255	-0.487602	-2.20125		15375	b1255	-0.408034	-1.85389
15376	b1256	-0.106325	-0.759467		15376	b1256	-0.156597	-1.11328		15376	b1256	-0.192587	-1.42137			15376	b1256	-0.266844	-1.98451		15376	b1256	-0.110925	-0.738412		15376	b1256	-0.0389971	-0.275081			15376	b1256	-0.267627	-1.67384		15376	b1256	-0.105289	-0.715087		15376	b1256	-0.142709	-0.91209
15380	b1260	-0.25692	-1.16441		15380	b1260	-0.47577	-1.80923		15380	b1260	-0.780839	-2.11179			15380	b1260	-0.269654	-1.43941		15380	b1260	-0.431682	-1.76152		15380	b1260	-0.393304	-1.57834			15380	b1260	-0.193104	-0.840002		15380	b1260	-0.370247	-1.54409		15380	b1260	-0.629189	-2.89823
15382	b1262	-0.0396605	-0.211888		15382	b1262	-0.576394	-2.63717		15382	b1262	-0.406206	-2.29461			15382	b1262	-0.145677	-0.832484		15382	b1262	-0.136986	-0.656452		15382	b1262	-0.10362	-0.570494			15382	b1262	-0.148301	-0.747008		15382	b1262	-0.125538	-0.647062		15382	b1262	-0.232659	-1.37002
15383	b1263	-0.371448	-1.324		15383	b1263	-0.522274	-1.75018		15383	b1263	-0.594034	-1.47504			15383	b1263	-0.142644	-0.437799		15383	b1263	-0.607071	-2.0132		15383	b1263	-0.304315	-0.904037			15383	b1263	-0.344568	-0.969315		15383	b1263	-0.336041	-1.16933		15383	b1263	-0.506946	-1.73655
15384	b1264	0.15193	0.63843		15384	b1264	0.00119329	0.00619511		15384	b1264	-0.0336487	-0.160383			15384	b1264	0.223242	0.958614		15384	b1264	0.244697	1.26669		15384	b1264	0.258432	1.37269			15384	b1264	0.165902	0.787303		15384	b1264	0.187907	0.982292		15384	b1264	-0.0151422	-0.0686274
15386	b1266	-0.531442	-1.44761		15386	b1266	-0.589333	-1.31853		15386	b1266	-0.820349	-3.3807			15386	b1266	-0.607877	-2.05411		15386	b1266	-0.309224	-0.801493		15386	b1266	-0.680556	-2.44495			15386	b1266	-0.80174	-2.20129		15386	b1266	-0.879529	-2.74643		15386	b1266	-0.408163	-1.06836
15388	b1268	-0.228775	-1.11197		15388	b1268	-0.30936	-1.51109		15388	b1268	-0.339213	-1.77912			15388	b1268	-0.273169	-1.32931		15388	b1268	-0.0584854	-0.291835		15388	b1268	-0.10633	-0.537081			15388	b1268	-0.246867	-1.25398		15388	b1268	-0.204075	-0.949197		15388	b1268	-0.130907	-0.675356
15389	b1269	-0.700827	-1.46133		15389	b1269	-0.946131	-2.23956		15389	b1269	-1.10774	-2.83119			15389	b1269	-0.854705	-1.97113		15389	b1269	-0.945179	-2.64347		15389	b1269	-0.782913	-1.83398			15389	b1269	-0.9037	-2.05073		15389	b1269	-0.983423	-2.26242		15389	b1269	-1.13487	-2.33868
15390	b1270	0.0668564	0.177707		15390	b1270	-0.0224388	-0.0570286		15390	b1270	-0.0537529	-0.152299			15390	b1270	-0.0552981	-0.149297		15390	b1270	-0.0772104	-0.200609		15390	b1270	0.00290578	0.00771226			15390	b1270	-0.0815072	-0.299895		15390	b1270	-0.0280409	-0.0591456		15390	b1270	-0.0626011	-0.160334
15391	b1271	0.630778	1.25324		15391	b1271	0.407002	0.942284		15391	b1271	0.22567	0.489104			15391	b1271	0.442232	0.788538		15391	b1271	0.326069	0.70063		15391	b1271	0.486764	1.05113			15391	b1271	0.393244	0.687987		15391	b1271	0.499493	1.00989		15391	b1271	0.361353	0.807539
15392	b1272	-0.0295235	-0.168588		15392	b1272	-0.181579	-0.99746		15392	b1272	-0.258283	-1.40338			15392	b1272	-0.0709663	-0.408194		15392	b1272	-0.105819	-0.591719		15392	b1272	-0.0947822	-0.542172			15392	b1272	-0.177578	-0.894439		15392	b1272	-0.102135	-0.541474		15392	b1272	-0.100106	-0.578816
15396	b1276	-0.066743	-0.302744		15396	b1276	-0.0131932	-0.0663214		15396	b1276	-0.0652598	-0.309372			15396	b1276	-0.119933	-0.553599		15396	b1276	-0.0868816	-0.392961		15396	b1276	-0.161564	-0.779958			15396	b1276	-0.243578	-1.09891		15396	b1276	-0.117213	-0.550796		15396	b1276	-0.103456	-0.53901
15398	b1278	-1.03754	-1.28825		15398	b1278	-0.533851	-0.740594		15398	b1278	-0.677599	-0.899203			15398	b1278	-0.480931	-0.942182		15398	b1278	-0.593897	-1.02815		15398	b1278	-0.695263	-1.00222			15398	b1278	-0.45937	-0.997226		15398	b1278	-0.508423	-1.11189		15398	b1278	-0.507046	-0.873276
15402	b1282	-0.0411098	-0.150391		15402	b1282	-0.101838	-0.352274		15402	b1282	-0.210493	-0.695697			15402	b1282	-0.141568	-0.599566		15402	b1282	-0.00865107	-0.0343407		15402	b1282	-0.217331	-0.945168			15402	b1282	0.0357614	0.142287		15402	b1282	0.118691	0.551575		15402	b1282	0.0527751	0.245207
15403	b1283	0.123011	0.648398		15403	b1283	-0.033301	-0.180745		15403	b1283	-0.0957577	-0.528583			15403	b1283	-0.0761277	-0.397485		15403	b1283	-0.131357	-0.654739		15403	b1283	0.036203	0.176197			15403	b1283	-0.0428624	-0.196313		15403	b1283	-0.115509	-0.622449		15403	b1283	0.0056332	0.0278356
15404	b1284	0.486744	2.0223		15404	b1284	0.566495	2.32149		15404	b1284	0.487012	1.52366			15404	b1284	0.653642	2.92135		15404	b1284	0.617972	2.51662		15404	b1284	0.500553	2.29885			15404	b1284	0.5531	1.65971		15404	b1284	0.348094	1.2096		15404	b1284	0.411969	1.70546
15405	b1285	-0.503008	-2.05919		15405	b1285	-0.400804	-1.70038		15405	b1285	-0.498299	-2.02609			15405	b1285	-0.395528	-1.71223		15405	b1285	-0.5847	-2.35818		15405	b1285	-0.366809	-1.38478			15405	b1285	-0.415693	-1.54448		15405	b1285	-0.356689	-1.53317		15405	b1285	-0.378969	-1.44568
15407	b1287	0.0198035	0.0270515		15407	b1287	0.0362417	0.0507113		15407	b1287	0.17566	0.284454			15407	b1287	0.0807341	0.14615		15407	b1287	-0.151572	-0.17725		15407	b1287	0.0193092	0.0315537			15407	b1287	-0.0466701	-0.0458888		15407	b1287	-0.086169	-0.123114		15407	b1287	-0.106838	-0.130924
15409	b1289	-0.262867	-0.561035		15409	b1289	-0.180759	-0.479621		15409	b1289	-0.279241	-0.588609			15409	b1289	-0.52865	-1.39868		15409	b1289	-0.426478	-0.863877		15409	b1289	-0.207437	-0.486434			15409	b1289	-0.382727	-1.02512		15409	b1289	-0.217717	-0.534257		15409	b1289	-0.104672	-0.265824
15414	b1294	-0.082025	-0.392365		15414	b1294	0.0225726	0.0897613		15414	b1294	0.0269827	0.130517			15414	b1294	-0.261888	-1.12221		15414	b1294	-0.259695	-1.02899		15414	b1294	-0.114876	-0.55965			15414	b1294	-0.140117	-0.613969		15414	b1294	-0.236404	-1.0516		15414	b1294	-0.150458	-0.555584
15416	b1296	-0.0644139	-0.265099		15416	b1296	0.0159838	0.0737551		15416	b1296	-0.00634736	-0.024421			15416	b1296	0.0140101	0.0556593		15416	b1296	-0.161964	-0.681847		15416	b1296	0.106641	0.476739			15416	b1296	-0.0354431	-0.113773		15416	b1296	-0.118754	-0.586009		15416	b1296	0.100134	0.486938
15417	b1297	0.066851	0.302094		15417	b1297	0.040162	0.153275		15417	b1297	-0.132898	-0.509007			15417	b1297	-0.0548385	-0.233288		15417	b1297	-0.0211064	-0.0816306		15417	b1297	-0.0116333	-0.045791			15417	b1297	0.0470455	0.191323		15417	b1297	-0.102721	-0.388522		15417	b1297	-0.00803808	-0.031697
15418	b1298	0.309111	0.50964		15418	b1298	0.373762	0.655302		15418	b1298	0.27821	0.446979			15418	b1298	0.451967	0.780801		15418	b1298	0.549151	0.867311		15418	b1298	0.283264	0.444188			15418	b1298	0.179187	0.277612		15418	b1298	0.435331	0.786394		15418	b1298	0.352706	0.574981
15419	b1299	1.01539	2.57363		15419	b1299	0.914191	2.69283		15419	b1299	0.953484	2.7622			15419	b1299	1.23851	3.67016		15419	b1299	0.779715	2.22518		15419	b1299	1.25097	3.47034			15419	b1299	1.07906	3.16859		15419	b1299	1.0836	4.01813		15419	b1299	1.10557	3.22249
15420	b1300	-0.175427	-0.895526		15420	b1300	-0.298483	-1.42582		15420	b1300	-0.161314	-0.735572			15420	b1300	-0.0584343	-0.264825		15420	b1300	-0.00786084	-0.0397325		15420	b1300	-0.205662	-0.867522			15420	b1300	0.107251	0.331096		15420	b1300	-0.0545699	-0.272054		15420	b1300	-0.0792993	-0.315946
15421	b1301	0.400791	1.74872		15421	b1301	0.334303	1.27573		15421	b1301	0.374798	1.73427			15421	b1301	0.457283	2.13888		15421	b1301	0.338641	1.50857		15421	b1301	0.208005	0.870206			15421	b1301	0.386821	2.15661		15421	b1301	0.334351	1.47185		15421	b1301	0.331954	1.3014
15422	b1302	-0.413036	-1.27737		15422	b1302	-0.190348	-0.602699		15422	b1302	-0.362314	-1.08505			15422	b1302	-0.329079	-1.24639		15422	b1302	-0.441474	-1.15142		15422	b1302	-0.362361	-1.03438			15422	b1302	-0.172726	-0.747336		15422	b1302	-0.321278	-1.06746		15422	b1302	-0.375824	-1.45871
15423	b1303	0.28769	1.14021		15423	b1303	0.251648	0.945507		15423	b1303	0.236691	0.873467			15423	b1303	0.275233	1.17899		15423	b1303	0.370796	1.52553		15423	b1303	0.191274	0.875556			15423	b1303	0.265075	0.936923		15423	b1303	0.134362	0.507943		15423	b1303	0.149041	0.663385
15424	b1304	-1.19443	-3.22467		15424	b1304	-1.1272	-3.51743		15424	b1304	-1.42777	-5.5153			15424	b1304	-1.11406	-4.04132		15424	b1304	-1.33856	-3.41955		15424	b1304	-0.975697	-2.79859			15424	b1304	-1.30171	-3.56531		15424	b1304	-1.28513	-3.37273		15424	b1304	-1.08578	-2.4921
15425	b1305	0.116548	0.209657		15425	b1305	0.0723874	0.148858		15425	b1305	0.114419	0.216299			15425	b1305	-0.229316	-0.396987		15425	b1305	0.124439	0.221862		15425	b1305	-0.147502	-0.330863			15425	b1305	-0.254421	-0.305566		15425	b1305	-0.00459109	-0.0101901		15425	b1305	0.155103	0.302753
15426	b1306	-0.150927	-0.331269		15426	b1306	0.0407982	0.0754926		15426	b1306	-0.106053	-0.222342			15426	b1306	-0.0126299	-0.0274612		15426	b1306	-0.195767	-0.384309		15426	b1306	0.0323429	0.0675079			15426	b1306	-0.15662	-0.382767		15426	b1306	-0.18887	-0.332995		15426	b1306	-0.074991	-0.18818
15428	b1308	-0.459277	-1.72792		15428	b1308	-0.390694	-1.16668		15428	b1308	-0.385498	-1.09768			15428	b1308	-0.493443	-1.56852		15428	b1308	-0.373846	-1.01584		15428	b1308	-0.44763	-1.23678			15428	b1308	-0.581602	-1.67136		15428	b1308	-0.465129	-1.13669		15428	b1308	-0.4968	-1.32463
15429	b1309	-0.874951	-2.04741		15429	b1309	-0.842561	-1.91801		15429	b1309	-0.71702	-1.42331			15429	b1309	-0.626974	-1.67748		15429	b1309	-0.637799	-1.80282		15429	b1309	-0.822056	-1.91231			15429	b1309	-0.787253	-2.00448		15429	b1309	-0.884619	-1.78645		15429	b1309	-0.617372	-1.63651
15430	b1310	-0.372782	-1.52292		15430	b1310	-0.307968	-1.56674		15430	b1310	-0.388758	-1.72615			15430	b1310	-0.387944	-1.92864		15430	b1310	-0.618721	-2.71376		15430	b1310	-0.348364	-1.47373			15430	b1310	-0.271817	-1.08567		15430	b1310	-0.379382	-1.75645		15430	b1310	-0.443586	-1.74649
15431	b1311	0.0826701	0.486258		15431	b1311	0.112555	0.65484		15431	b1311	0.0806584	0.413209			15431	b1311	0.0932845	0.512821		15431	b1311	0.0898682	0.492889		15431	b1311	0.0647164	0.347135			15431	b1311	0.00721505	0.0368428		15431	b1311	0.0349654	0.183468		15431	b1311	0.123025	0.652348
15432	b1312	0.456569	2.80704		15432	b1312	0.384849	2.32724		15432	b1312	0.366257	2.28037			15432	b1312	0.15437	0.935822		15432	b1312	0.266322	1.45134		15432	b1312	0.27058	1.62237			15432	b1312	0.140593	0.750089		15432	b1312	0.336939	1.8806		15432	b1312	0.36296	2.16173
15433	b1313	0.149988	0.629949		15433	b1313	0.263183	0.963746		15433	b1313	0.174195	0.747176			15433	b1313	0.0279839	0.0955696		15433	b1313	0.197091	0.684969		15433	b1313	0.216891	0.94672			15433	b1313	0.221748	0.968743		15433	b1313	0.219839	0.851574		15433	b1313	0.350329	1.37934
15434	b1314	0.27992	1.23508		15434	b1314	0.198435	0.724128		15434	b1314	0.318423	1.27036			15434	b1314	0.278842	1.13724		15434	b1314	0.149997	0.793385		15434	b1314	0.130589	0.466785			15434	b1314	-0.0514618	-0.187255		15434	b1314	0.134476	0.56576		15434	b1314	0.111579	0.446299
15435	b1315	-0.0453802	-0.164724		15435	b1315	0.0624868	0.22859		15435	b1315	0.0697379	0.253905			15435	b1315	0.0604349	0.227955		15435	b1315	-0.013341	-0.0520547		15435	b1315	0.0944503	0.402259			15435	b1315	0.0662942	0.244108		15435	b1315	0.0626342	0.262488		15435	b1315	0.0680907	0.271372
15436	b1316	0.130868	0.915412		15436	b1316	0.191136	1.32974		15436	b1316	0.0938488	0.614781			15436	b1316	0.106922	0.723403		15436	b1316	0.124399	0.850769		15436	b1316	0.156714	0.992445			15436	b1316	0.0223887	0.142097		15436	b1316	0.0278143	0.164845		15436	b1316	0.131374	0.847993
15437	b1317	0.106187	0.408451		15437	b1317	0.0991618	0.342106		15437	b1317	0.0897047	0.352175			15437	b1317	0.00125885	0.00467477		15437	b1317	0.103052	0.378449		15437	b1317	0.107452	0.431151			15437	b1317	0.133485	0.418292		15437	b1317	0.0347922	0.140321		15437	b1317	0.154946	0.67562
15439	b1319	-0.247964	-1.14257		15439	b1319	-0.143135	-0.669105		15439	b1319	-0.193505	-0.896386			15439	b1319	-0.191282	-0.886651		15439	b1319	-0.182515	-0.814705		15439	b1319	-0.268174	-1.1197			15439	b1319	-0.315443	-1.40411		15439	b1319	-0.168738	-0.815845		15439	b1319	-0.286475	-1.26626
15440	b1320	-0.0173753	-0.0638104		15440	b1320	-0.0372957	-0.170967		15440	b1320	0.0203066	0.0857004			15440	b1320	-0.000323833	-0.00131729		15440	b1320	0.0906118	0.386951		15440	b1320	-0.00445083	-0.0175062			15440	b1320	0.0571637	0.244146		15440	b1320	-0.00319914	-0.012353		15440	b1320	-0.000973838	-0.00393429
15441	b1321	-0.0245601	-0.0876704		15441	b1321	-0.183958	-0.656326		15441	b1321	-0.100927	-0.37221			15441	b1321	0.0524568	0.167869		15441	b1321	-0.134207	-0.503076		15441	b1321	-0.106869	-0.363731			15441	b1321	-0.374923	-1.27934		15441	b1321	-0.0603896	-0.217793		15441	b1321	-0.0153791	-0.0602816
15442	b1322	-0.00723589	-0.0281628		15442	b1322	-0.203518	-0.861389		15442	b1322	-0.0815458	-0.331133			15442	b1322	-0.0885229	-0.423892		15442	b1322	-0.152319	-0.620674		15442	b1322	-0.00943474	-0.0398045			15442	b1322	-0.15098	-0.640623		15442	b1322	-0.0923451	-0.406956		15442	b1322	-0.0469389	-0.1788
15443	b1323	-0.676853	-1.65037		15443	b1323	-0.612895	-1.78968		15443	b1323	-0.2817	-1.1913			15443	b1323	-0.541992	-1.48717		15443	b1323	-0.853908	-2.47773		15443	b1323	-0.829886	-2.44569			15443	b1323	-0.432316	-1.45585		15443	b1323	-0.77325	-2.395		15443	b1323	-0.461825	-1.49338
15444	b1324	0.487006	1.51003		15444	b1324	0.531627	1.75444		15444	b1324	0.117453	0.389048			15444	b1324	0.676631	2.35411		15444	b1324	0.612031	1.84371		15444	b1324	0.372045	1.15502			15444	b1324	0.783449	2.14383		15444	b1324	0.452905	1.56151		15444	b1324	0.50747	1.48444
15445	b1325	0.0887642	0.269445		15445	b1325	0.0426506	0.144066		15445	b1325	0.0477936	0.154191			15445	b1325	0.130773	0.435448		15445	b1325	0.0171821	0.0555749		15445	b1325	-0.0187673	-0.0575555			15445	b1325	0.106525	0.300677		15445	b1325	-0.00820624	-0.025714		15445	b1325	-0.156425	-0.460915
15446	b1326	-0.167089	-0.772329		15446	b1326	-0.0584433	-0.280335		15446	b1326	-0.0957681	-0.349958			15446	b1326	-0.236536	-1.06835		15446	b1326	-0.0475508	-0.202874		15446	b1326	-0.0745724	-0.290092			15446	b1326	-0.0385463	-0.168658		15446	b1326	-0.0345749	-0.160589		15446	b1326	-0.136455	-0.567395
15447	b1327	0.213391	1.05899		15447	b1327	0.181083	0.867096		15447	b1327	0.205663	0.985302			15447	b1327	0.117563	0.576477		15447	b1327	0.14685	0.719262		15447	b1327	0.231331	1.06798			15447	b1327	0.217992	1.00001		15447	b1327	0.186349	0.8668		15447	b1327	0.283139	1.3862
15448	b1328	0.044319	0.155857		15448	b1328	0.103814	0.372388		15448	b1328	-0.0222332	-0.0822592			15448	b1328	0.116453	0.437339		15448	b1328	-0.140786	-0.601946		15448	b1328	-0.100378	-0.372471			15448	b1328	-0.443457	-1.64976		15448	b1328	-0.122888	-0.426618		15448	b1328	0.0428402	0.173752
15449	b1329	-0.02601	-0.130326		15449	b1329	0.117146	0.620856		15449	b1329	0.030943	0.149583			15449	b1329	-0.00950059	-0.0426772		15449	b1329	0.0782584	0.380496		15449	b1329	0.0271121	0.137035			15449	b1329	-0.1328	-0.495575		15449	b1329	0.00160276	0.00806633		15449	b1329	0.0151545	0.0765288
15450	b1330	-0.21278	-0.449414		15450	b1330	-0.47877	-0.898102		15450	b1330	-0.41768	-0.81397			15450	b1330	-0.137052	-0.314739		15450	b1330	-0.209958	-0.411803		15450	b1330	-0.422276	-0.917043			15450	b1330	-0.479567	-1.04392		15450	b1330	-0.413214	-0.771523		15450	b1330	-0.255717	-0.496815
15453	b1333	0.262788	0.461831		15453	b1333	0.452232	0.725321		15453	b1333	0.367474	0.652559			15453	b1333	0.330074	0.620582		15453	b1333	0.291635	0.468012		15453	b1333	-0.0743819	-0.117364			15453	b1333	0.238711	0.430351		15453	b1333	0.114799	0.179331		15453	b1333	0.134062	0.233611
15456	b1336	0.0223203	0.0680022		15456	b1336	0.0979069	0.298401		15456	b1336	0.273259	0.8883			15456	b1336	0.191189	0.554709		15456	b1336	0.228526	0.745707		15456	b1336	0.184623	0.650125			15456	b1336	-0.133116	-0.37325		15456	b1336	0.0737788	0.225602		15456	b1336	0.146106	0.489215
15457	b1337	0.0535563	0.218406		15457	b1337	0.168759	0.683715		15457	b1337	-0.263019	-1.06459			15457	b1337	0.147086	0.592051		15457	b1337	-0.133213	-0.517408		15457	b1337	-0.00411866	-0.0167454			15457	b1337	0.0123882	0.0483353		15457	b1337	-0.0381905	-0.150908		15457	b1337	-0.156163	-0.639333
15458	b1338	-0.114573	-0.595734		15458	b1338	-0.118096	-0.607214		15458	b1338	0.0290929	0.151972			15458	b1338	0.0720691	0.372812		15458	b1338	0.0180222	0.0915394		15458	b1338	-0.125016	-0.649243			15458	b1338	-0.112326	-0.58045		15458	b1338	0.0028977	0.015371		15458	b1338	-0.000303649	-0.00161094
15459	b1339	0.528587	1.93207		15459	b1339	0.41675	1.30634		15459	b1339	0.452177	1.66435			15459	b1339	0.4233	1.55659		15459	b1339	0.474451	1.54007		15459	b1339	0.443703	1.55392			15459	b1339	0.481895	1.55244		15459	b1339	0.408017	1.40803		15459	b1339	0.46913	1.66078
15461	b1341	0.165422	1.00031		15461	b1341	0.24951	1.56733		15461	b1341	0.299487	1.78163			15461	b1341	0.384489	2.41277		15461	b1341	0.198579	1.13422		15461	b1341	0.227081	1.24381			15461	b1341	0.305555	1.77268		15461	b1341	0.249865	1.42638		15461	b1341	0.215674	1.01487
15462	b1342	-0.0545372	-0.316636		15462	b1342	-0.165124	-0.829429		15462	b1342	-0.0738186	-0.378579			15462	b1342	-0.248807	-1.2659		15462	b1342	-0.00595772	-0.0281073		15462	b1342	-0.0800978	-0.520482			15462	b1342	-0.171843	-0.97207		15462	b1342	-0.165781	-0.817055		15462	b1342	-0.0899775	-0.47347
15463	b1343	0.18077	0.697892		15463	b1343	0.146291	0.520234		15463	b1343	0.189839	0.600955			15463	b1343	0.171576	0.7214		15463	b1343	-0.0320281	-0.119269		15463	b1343	-0.0911392	-0.383727			15463	b1343	-0.0858355	-0.359914		15463	b1343	0.02916	0.111822		15463	b1343	0.0374166	0.135017
15464	b1344	0.258501	1.12332		15464	b1344	-0.100802	-0.394296		15464	b1344	0.15455	0.64842			15464	b1344	0.202273	0.882079		15464	b1344	0.0403232	0.170605		15464	b1344	-0.143625	-0.611209			15464	b1344	0.40821	1.4837		15464	b1344	0.0632536	0.25997		15464	b1344	0.0154941	0.0666757
15465	b1345	0.293007	1.18579		15465	b1345	0.211489	0.858121		15465	b1345	0.339228	1.34965			15465	b1345	0.153572	0.634194		15465	b1345	0.185874	0.727692		15465	b1345	0.217413	0.875928			15465	b1345	0.238651	0.896165		15465	b1345	0.14212	0.579615		15465	b1345	0.0277916	0.107175
15469	b1349	0.276494	1.43887		15469	b1349	0.170548	0.793742		15469	b1349	0.223406	1.02105			15469	b1349	0.276886	1.2448		15469	b1349	0.0960452	0.469327		15469	b1349	0.213324	1.03845			15469	b1349	0.279309	1.25363		15469	b1349	0.257351	1.1546		15469	b1349	0.216057	0.954
15470	b1350	0.241248	1.22372		15470	b1350	0.141132	0.710665		15470	b1350	0.114962	0.549749			15470	b1350	0.235358	1.21621		15470	b1350	0.140051	0.73296		15470	b1350	0.141331	0.712428			15470	b1350	0.250501	1.01513		15470	b1350	0.0793791	0.370597		15470	b1350	0.186986	0.78912
15474	b1353	-0.0305983	-0.162715		15474	b1353	-0.0644406	-0.309297		15474	b1353	0.050671	0.250255			15474	b1353	-0.173444	-0.718341		15474	b1353	-0.105986	-0.515105		15474	b1353	-0.159847	-0.698802			15474	b1353	-0.149801	-0.45664		15474	b1353	-0.200307	-0.866279		15474	b1353	-0.141866	-0.718591
15476	b4527	0.128677	0.371049		15476	b4527	0.332919	1.02217		15476	b4527	0.451947	1.47989			15476	b4527	0.435195	1.29628		15476	b4527	0.292101	0.795038		15476	b4527	0.373613	1.38024			15476	b4527	0.202403	0.529908		15476	b4527	0.213	0.612456		15476	b4527	0.299564	0.962651
15477	b1355	0.258722	0.833274		15477	b1355	0.380623	1.23929		15477	b1355	0.454313	1.83231			15477	b1355	0.333768	1.28288		15477	b1355	-0.00269754	-0.0108139		15477	b1355	0.483741	2.14946			15477	b1355	0.424001	1.15967		15477	b1355	0.308981	1.1811		15477	b1355	0.30153	1.09304
15481	b1359	-0.215413	-0.738164		15481	b1359	-0.240133	-0.668573		15481	b1359	-0.114492	-0.363989			15481	b1359	-0.376927	-0.956951		15481	b1359	-0.360521	-0.991966		15481	b1359	-0.403273	-0.983517			15481	b1359	-0.331041	-0.943351		15481	b1359	-0.335725	-0.89391		15481	b1359	-0.411157	-0.932507
15482	b1360	0.257026	0.495949		15482	b1360	0.505811	1.72233		15482	b1360	0.184996	0.419468			15482	b1360	0.413849	0.955563		15482	b1360	0.568597	2.00969		15482	b1360	0.318127	0.671443			15482	b1360	0.487425	1.69361		15482	b1360	0.225916	0.356657		15482	b1360	0.526591	1.61941
15487	b1365	0.257536	1.52553		15487	b1365	0.265853	1.70785		15487	b1365	0.306767	1.82154			15487	b1365	0.337098	1.9559		15487	b1365	0.214166	1.25292		15487	b1365	0.169525	1.0147			15487	b1365	0.123095	0.770304		15487	b1365	0.234455	1.47591		15487	b1365	0.365257	2.24344
15488	b1366	-0.114373	-0.477153		15488	b1366	-0.251735	-1.0944		15488	b1366	-0.113657	-0.471541			15488	b1366	-0.0445328	-0.190638		15488	b1366	-0.106678	-0.45711		15488	b1366	-0.163826	-0.624531			15488	b1366	-0.0169388	-0.0751638		15488	b1366	-0.148116	-0.5495		15488	b1366	-0.0591238	-0.267604
15494	b1372	0.427735	2.08339		15494	b1372	0.444462	2.01879		15494	b1372	0.586589	2.62647			15494	b1372	0.488114	2.30849		15494	b1372	0.570115	2.74739		15494	b1372	0.439247	1.96261			15494	b1372	0.258329	1.1844		15494	b1372	0.474478	2.41829		15494	b1372	0.405429	1.73316
15498	b1376	0.178288	0.935353		15498	b1376	-0.0155336	-0.079914		15498	b1376	0.153695	0.794216			15498	b1376	0.001875	0.0101933		15498	b1376	0.15598	0.743292		15498	b1376	0.0810948	0.401743			15498	b1376	0.0321028	0.145956		15498	b1376	0.189774	0.952726		15498	b1376	0.108316	0.551099
15499	b1377	-0.0591947	-0.194755		15499	b1377	-0.0952718	-0.278382		15499	b1377	-0.0570197	-0.225975			15499	b1377	-0.00676443	-0.0274725		15499	b1377	-0.0540258	-0.189104		15499	b1377	-0.0835713	-0.309486			15499	b1377	0.000736016	0.00187706		15499	b1377	-0.193347	-0.730244		15499	b1377	-0.0376021	-0.134405
15500	b1378	-0.169373	-0.840172		15500	b1378	-0.22691	-1.13174		15500	b1378	-0.100342	-0.556836			15500	b1378	-0.114203	-0.645304		15500	b1378	-0.209097	-1.21407		15500	b1378	-0.243499	-1.33279			15500	b1378	-0.321374	-1.72171		15500	b1378	-0.238239	-1.42921		15500	b1378	-0.189831	-1.03072
15501	b1379	0.257886	0.771588		15501	b1379	0.176721	0.487179		15501	b1379	0.219306	0.63706			15501	b1379	0.11249	0.282383		15501	b1379	0.0731093	0.180926		15501	b1379	0.140796	0.412734			15501	b1379	0.138699	0.368928		15501	b1379	0.160107	0.42781		15501	b1379	0.146269	0.426296
15503	b1381	0.0994579	0.559859		15503	b1381	0.0101164	0.057516		15503	b1381	-0.0116835	-0.0662913			15503	b1381	0.0482125	0.282226		15503	b1381	-0.00149841	-0.00851362		15503	b1381	0.0533722	0.302785			15503	b1381	0.0498609	0.253279		15503	b1381	-0.0258211	-0.162035		15503	b1381	-0.117726	-0.617303
15504	b1382	-0.698661	-1.42285		15504	b1382	-0.506473	-1.06529		15504	b1382	-0.753393	-1.55064			15504	b1382	-0.349112	-0.751302		15504	b1382	-0.870009	-1.72135		15504	b1382	-0.928451	-1.90065			15504	b1382	-0.27477	-0.555761		15504	b1382	-0.46122	-1.01925		15504	b1382	-0.741006	-1.52269
15506	b1384	-0.0828415	-0.306026		15506	b1384	-0.0499469	-0.197026		15506	b1384	-0.00176383	-0.00721079			15506	b1384	0.0313173	0.122026		15506	b1384	-0.334295	-1.4073		15506	b1384	-0.165085	-0.613235			15506	b1384	-0.131481	-0.48792		15506	b1384	-0.0705127	-0.315813		15506	b1384	-0.113175	-0.42075
15507	b1385	0.51166	2.64615		15507	b1385	0.401517	2.27786		15507	b1385	0.342077	1.72322			15507	b1385	0.400334	2.26356		15507	b1385	0.487737	2.75349		15507	b1385	0.330154	1.81192			15507	b1385	0.0666504	0.388703		15507	b1385	0.338888	1.77128		15507	b1385	0.365973	1.79907
15508	b1386	-0.079271	-0.496338		15508	b1386	-0.0189374	-0.114815		15508	b1386	-0.266523	-1.64021			15508	b1386	-0.156311	-0.94071		15508	b1386	-0.342498	-2.06042		15508	b1386	-0.135551	-0.806615			15508	b1386	-0.157929	-0.863765		15508	b1386	-0.11761	-0.716647		15508	b1386	-0.0503115	-0.31679
15509	b1387	0.240086	1.25351		15509	b1387	0.12764	0.720075		15509	b1387	0.171142	0.901336			15509	b1387	0.212083	1.16214		15509	b1387	0.303755	1.56189		15509	b1387	0.128047	0.723441			15509	b1387	0.150566	0.55844		15509	b1387	0.198988	1.15717		15509	b1387	0.226218	1.29512
15510	b1388	-0.115204	-0.520432		15510	b1388	0.178515	0.795457		15510	b1388	0.083238	0.334147			15510	b1388	0.0366039	0.144952		15510	b1388	0.0621601	0.229147		15510	b1388	0.178649	0.651095			15510	b1388	0.283128	0.892567		15510	b1388	0.0517985	0.220642		15510	b1388	0.0198566	0.0928855
15512	b1390	-0.0272605	-0.0719178		15512	b1390	-0.0588275	-0.12952		15512	b1390	-0.136782	-0.277246			15512	b1390	-0.155633	-0.365928		15512	b1390	0.0348803	0.0855832		15512	b1390	-0.15014	-0.309336			15512	b1390	-0.073764	-0.183501		15512	b1390	-0.326683	-0.675029		15512	b1390	-0.111951	-0.260643
15514	b1392	0.258002	0.947401		15514	b1392	0.306039	0.960536		15514	b1392	0.378111	1.47979			15514	b1392	0.290786	1.02247		15514	b1392	0.236844	0.802611		15514	b1392	0.365965	1.36629			15514	b1392	0.369723	1.38218		15514	b1392	0.313117	1.01588		15514	b1392	0.236748	0.775547
15516	b1394	0.174365	0.57292		15516	b1394	0.259477	0.804466		15516	b1394	0.391718	1.31627			15516	b1394	0.020164	0.0568369		15516	b1394	0.0564788	0.182513		15516	b1394	-0.0609627	-0.179308			15516	b1394	0.0892071	0.26342		15516	b1394	0.175333	0.593803		15516	b1394	-0.0661334	-0.226032
15517	b1395	-0.206382	-0.874724		15517	b1395	-0.0340943	-0.155898		15517	b1395	-0.112741	-0.533982			15517	b1395	-0.154438	-0.812928		15517	b1395	0.0219938	0.108681		15517	b1395	-0.181234	-0.837929			15517	b1395	-0.265494	-1.23332		15517	b1395	-0.114453	-0.617443		15517	b1395	-0.193797	-0.789727
15518	b1396	0.775324	2.44683		15518	b1396	0.63681	1.8583		15518	b1396	0.685217	2.07847			15518	b1396	0.556663	1.58936		15518	b1396	0.622854	1.78824		15518	b1396	0.65884	2.21291			15518	b1396	0.63653	2.24651		15518	b1396	0.680018	2.26782		15518	b1396	0.740122	2.35465
15519	b1397	0.106593	0.544338		15519	b1397	-0.00790617	-0.0409428		15519	b1397	0.100933	0.510488			15519	b1397	0.0993159	0.526957		15519	b1397	0.0971972	0.539274		15519	b1397	0.0506082	0.25878			15519	b1397	0.0460954	0.216707		15519	b1397	0.143062	0.757253		15519	b1397	0.132644	0.687269
15521	b1399	0.58276	1.64459		15521	b1399	0.2585	0.676104		15521	b1399	0.215501	0.577117			15521	b1399	0.402697	1.09427		15521	b1399	0.242625	0.51149		15521	b1399	0.225899	0.555268			15521	b1399	0.196389	0.549964		15521	b1399	0.398364	1.04736		15521	b1399	0.155674	0.366046
15522	b1400	-0.622086	-1.37397		15522	b1400	-0.577181	-1.21162		15522	b1400	-0.460939	-1.24212			15522	b1400	-0.303673	-0.689424		15522	b1400	-0.414815	-0.759783		15522	b1400	-0.527515	-1.49995			15522	b1400	-0.532912	-1.17607		15522	b1400	-0.604273	-1.13529		15522	b1400	-0.420553	-0.999249
15528	b1406	0.206572	0.795253		15528	b1406	0.454516	1.77006		15528	b1406	0.297433	1.14405			15528	b1406	0.338395	1.35686		15528	b1406	0.330821	1.3475		15528	b1406	0.294957	1.38385			15528	b1406	0.267359	1.04511		15528	b1406	0.235323	0.995001		15528	b1406	0.379775	1.46605
15529	b1407	-0.106286	-0.399995		15529	b1407	-0.0971382	-0.323137		15529	b1407	-0.180203	-0.580859			15529	b1407	-0.0297928	-0.0968932		15529	b1407	-0.131353	-0.513801		15529	b1407	-0.250521	-0.846582			15529	b1407	-0.184839	-0.598053		15529	b1407	-0.228729	-0.742327		15529	b1407	-0.074027	-0.222312
15530	b1408	-0.456543	-1.40695		15530	b1408	-0.322735	-1.01133		15530	b1408	-0.30852	-1.17366			15530	b1408	-0.378028	-1.2033		15530	b1408	-0.223068	-0.730348		15530	b1408	-0.375784	-1.21026			15530	b1408	-0.608672	-2.10369		15530	b1408	-0.282848	-0.971213		15530	b1408	-0.27902	-0.995251
15532	b1410	0.215682	0.686489		15532	b1410	0.0788605	0.243515		15532	b1410	0.124605	0.40575			15532	b1410	0.183276	0.598764		15532	b1410	-0.0375279	-0.111673		15532	b1410	0.178405	0.609948			15532	b1410	0.0591982	0.179719		15532	b1410	0.0858	0.263032		15532	b1410	0.086901	0.26932
15533	b1411	0.0714736	0.376632		15533	b1411	0.0552161	0.27137		15533	b1411	-0.00341514	-0.0177079			15533	b1411	-0.149315	-0.739849		15533	b1411	0.0261074	0.128059		15533	b1411	-0.06746	-0.319401			15533	b1411	-0.374	-1.72311		15533	b1411	-0.13399	-0.649543		15533	b1411	-0.100021	-0.532822
15534	b1412	-0.170007	-0.446727		15534	b1412	0.146369	0.451551		15534	b1412	-0.0445333	-0.136238			15534	b1412	0.231879	0.709149		15534	b1412	-0.175714	-0.394334		15534	b1412	-0.0124436	-0.0341054			15534	b1412	-0.194296	-0.608786		15534	b1412	-0.055673	-0.157245		15534	b1412	-0.00495312	-0.0133521
15535	b1413	-0.0170549	-0.0863299		15535	b1413	0.0322179	0.163688		15535	b1413	-0.0170351	-0.0885677			15535	b1413	0.119226	0.621299		15535	b1413	0.0708856	0.339479		15535	b1413	0.0619818	0.337406			15535	b1413	-0.0403232	-0.205975		15535	b1413	0.068467	0.35091		15535	b1413	0.0573006	0.286807
15536	b1414	0.109404	0.438212		15536	b1414	0.0958118	0.400225		15536	b1414	-0.0440392	-0.162672			15536	b1414	-0.113203	-0.36299		15536	b1414	-0.0179652	-0.0799607		15536	b1414	0.0549766	0.216137			15536	b1414	-0.0407071	-0.14707		15536	b1414	0.113138	0.475905		15536	b1414	-0.0113379	-0.0449537
15537	b1415	-0.186128	-0.600287		15537	b1415	-0.0825419	-0.274732		15537	b1415	0.0453773	0.140199			15537	b1415	-0.118203	-0.354124		15537	b1415	-0.0785607	-0.259133		15537	b1415	-0.0799815	-0.238332			15537	b1415	-0.201569	-0.616304		15537	b1415	-0.0388201	-0.124838		15537	b1415	-0.0721125	-0.228647
15539	b1418	-0.257113	-0.566244		15539	b1418	0.197805	0.458632		15539	b1418	0.0815327	0.185742			15539	b1418	0.0327629	0.0757797		15539	b1418	-0.0103321	-0.0234193		15539	b1418	0.0180203	0.0409294			15539	b1418	-0.230032	-0.485192		15539	b1418	0.0259665	0.0615529		15539	b1418	-0.0148953	-0.0335231
15540	b1419	-0.21713	-0.813801		15540	b1419	-0.228588	-0.9624		15540	b1419	-0.0654392	-0.295297			15540	b1419	-0.148358	-0.53177		15540	b1419	-0.0744852	-0.339374		15540	b1419	-0.188256	-0.738415			15540	b1419	0.0974681	0.461585		15540	b1419	-0.0907671	-0.434419		15540	b1419	-0.00609134	-0.0278466
15542	b1421	-0.0154773	-0.0652071		15542	b1421	0.0141362	0.0610649		15542	b1421	0.165964	0.76371			15542	b1421	0.0899534	0.436389		15542	b1421	-0.0835277	-0.344225		15542	b1421	-0.0472997	-0.194581			15542	b1421	-0.0630665	-0.248971		15542	b1421	0.0388116	0.146929		15542	b1421	0.195297	0.795805
15543	b1422	0.0643544	0.390045		15543	b1422	0.175426	0.837494		15543	b1422	0.128851	0.785444			15543	b1422	0.0506037	0.252535		15543	b1422	-0.00451275	-0.0199656		15543	b1422	0.00216401	0.010472			15543	b1422	0.323692	1.7537		15543	b1422	0.118828	0.571827		15543	b1422	0.0323427	0.157481
15544	b1423	0.292279	0.959056		15544	b1423	0.282246	0.7504		15544	b1423	0.372551	1.27448			15544	b1423	0.27021	0.821908		15544	b1423	0.28276	0.921458		15544	b1423	0.22951	0.755638			15544	b1423	0.451108	1.43876		15544	b1423	0.530547	1.57656		15544	b1423	0.527263	1.38693
15545	b1424	-0.413377	-1.58215		15545	b1424	-0.459958	-1.91969		15545	b1424	-0.304695	-1.18973			15545	b1424	-0.31329	-1.35407		15545	b1424	-0.348767	-1.33366		15545	b1424	-0.337823	-1.23456			15545	b1424	-0.403279	-1.651		15545	b1424	-0.39388	-1.37805		15545	b1424	-0.296502	-1.16567
15548	b1427	0.00918628	0.0248946		15548	b1427	-0.00964807	-0.0238961		15548	b1427	-0.0759003	-0.169599			15548	b1427	-0.249851	-0.688411		15548	b1427	-0.118878	-0.264246		15548	b1427	-0.0261826	-0.0648946			15548	b1427	-0.0352356	-0.0777334		15548	b1427	-0.0607883	-0.136219		15548	b1427	0.0199338	0.0452287
15549	b1428	0.030983	0.15206		15549	b1428	0.0837174	0.456006		15549	b1428	0.120965	0.613179			15549	b1428	-0.00584682	-0.0268941		15549	b1428	-0.083158	-0.383807		15549	b1428	0.00428783	0.0238226			15549	b1428	0.0368157	0.141674		15549	b1428	0.113994	0.588343		15549	b1428	-0.0195282	-0.103925
15551	b1430	0.234912	0.671054		15551	b1430	0.313049	1.17946		15551	b1430	0.283671	0.913226			15551	b1430	0.120361	0.391513		15551	b1430	0.101854	0.365315		15551	b1430	0.347255	1.19349			15551	b1430	0.296914	0.927984		15551	b1430	0.249856	0.801672		15551	b1430	0.384612	1.24824
15552	b1431	0.576617	1.57525		15552	b1431	0.546426	1.88952		15552	b1431	0.533428	1.61609			15552	b1431	0.48728	1.69244		15552	b1431	0.299175	0.965493		15552	b1431	0.647426	1.93093			15552	b1431	0.532601	1.18016		15552	b1431	0.863529	3.12064		15552	b1431	0.527167	1.63434
15553	b1432	-0.0888744	-0.330984		15553	b1432	-0.0382823	-0.16004		15553	b1432	0.14232	0.700663			15553	b1432	0.0194441	0.0848749		15553	b1432	-0.102974	-0.502512		15553	b1432	-0.0798497	-0.394133			15553	b1432	-0.16091	-0.847867		15553	b1432	-0.20819	-0.872535		15553	b1432	-0.146825	-0.621331
15554	b1433	-0.121122	-0.49233		15554	b1433	0.0621812	0.248697		15554	b1433	0.14093	0.615352			15554	b1433	-0.0856307	-0.388811		15554	b1433	0.128331	0.522994		15554	b1433	0.172487	0.800879			15554	b1433	-0.124833	-0.472603		15554	b1433	-0.092572	-0.365526		15554	b1433	0.164609	0.60286
15556	b1435	-0.000812399	-0.00519765		15556	b1435	-0.021825	-0.126331		15556	b1435	-0.0587925	-0.33644			15556	b1435	-0.0628573	-0.389027		15556	b1435	-0.0620512	-0.306649		15556	b1435	0.0529763	0.319161			15556	b1435	0.0264939	0.155231		15556	b1435	0.0786191	0.491611		15556	b1435	-0.0278416	-0.138759
15558	b4532	0.516965	1.93283		15558	b4532	0.427539	1.57527		15558	b4532	0.531331	2.00679			15558	b4532	0.253847	0.920782		15558	b4532	0.478139	1.68532		15558	b4532	0.634744	2.02358			15558	b4532	0.367707	1.27633		15558	b4532	0.426585	1.17744		15558	b4532	0.526865	1.86121
15560	b1439	0.0975351	0.485835		15560	b1439	0.17384	0.890975		15560	b1439	0.149453	0.785019			15560	b1439	0.0518656	0.286356		15560	b1439	0.0354148	0.198803		15560	b1439	0.128696	0.771505			15560	b1439	0.41694	2.6071		15560	b1439	0.143415	0.758119		15560	b1439	0.213076	1.10776
15561	b1440	0.0834022	0.514738		15561	b1440	0.158118	0.909009		15561	b1440	0.125204	0.70459			15561	b1440	0.0605691	0.356576		15561	b1440	0.167193	1.10462		15561	b1440	0.142315	0.791986			15561	b1440	-0.134169	-0.736866		15561	b1440	0.0685265	0.372097		15561	b1440	0.138297	0.838181
15562	b1441	-0.0601695	-0.338241		15562	b1441	-0.0900628	-0.455111		15562	b1441	-0.189337	-0.789983			15562	b1441	-0.148501	-0.681968		15562	b1441	-0.114415	-0.5351		15562	b1441	-0.121528	-0.496442			15562	b1441	0.0313124	0.107327		15562	b1441	-0.127869	-0.603218		15562	b1441	-0.142608	-0.682876
15563	b1442	-0.00148715	-0.00557062		15563	b1442	-0.100095	-0.373627		15563	b1442	-0.0222332	-0.0990937			15563	b1442	0.005506	0.0282254		15563	b1442	0.138922	0.548722		15563	b1442	0.0898045	0.410301			15563	b1442	-0.122109	-0.426909		15563	b1442	-0.0085582	-0.037886		15563	b1442	0.146351	0.692172
15564	b1443	-0.0706813	-0.370006		15564	b1443	0.133769	0.684781		15564	b1443	-0.040385	-0.214526			15564	b1443	0.0726342	0.369854		15564	b1443	0.0189557	0.0944561		15564	b1443	-0.0157633	-0.0822838			15564	b1443	-0.216965	-0.96129		15564	b1443	0.0543533	0.289948		15564	b1443	0.00955312	0.0510439
15565	b1444	-0.0471594	-0.18315		15565	b1444	0.100784	0.431213		15565	b1444	-0.047841	-0.224701			15565	b1444	-0.111541	-0.479994		15565	b1444	-0.0455027	-0.170627		15565	b1444	-0.100866	-0.422924			15565	b1444	-0.295308	-0.942738		15565	b1444	0.0123219	0.0556355		15565	b1444	0.0949608	0.431697
15570	b1449	-0.147164	-0.734869		15570	b1449	-0.0134636	-0.071869		15570	b1449	-0.0793551	-0.403467			15570	b1449	-0.0862921	-0.433034		15570	b1449	-0.0891371	-0.443273		15570	b1449	-0.0728273	-0.373124			15570	b1449	-0.0917696	-0.523407		15570	b1449	-0.000903727	-0.00489771		15570	b1449	-0.0919486	-0.435166
15571	b1450	-0.218061	-0.640473		15571	b1450	-0.361092	-1.02763		15571	b1450	-0.359993	-1.02365			15571	b1450	-0.317248	-1.21021		15571	b1450	-0.395178	-1.17026		15571	b1450	-0.346326	-1.11337			15571	b1450	-0.584423	-1.70321		15571	b1450	-0.337837	-1.17632		15571	b1450	-0.407129	-1.24343
15572	b1451	0.336639	2.24096		15572	b1451	0.350259	2.36569		15572	b1451	0.243868	1.63732			15572	b1451	0.163566	0.911153		15572	b1451	0.23786	1.74736		15572	b1451	0.27881	1.79441			15572	b1451	0.23122	1.24077		15572	b1451	0.203109	1.27726		15572	b1451	0.192761	1.07769
15573	b1452	-0.0101275	-0.0446134		15573	b1452	-0.165385	-0.784227		15573	b1452	-0.0367616	-0.15618			15573	b1452	-0.221481	-0.942562		15573	b1452	-0.124356	-0.611042		15573	b1452	-0.113525	-0.507982			15573	b1452	-0.340799	-1.27076		15573	b1452	-0.0115522	-0.0502077		15573	b1452	0.0170242	0.0723317
15574	b1453	0.138837	0.420476		15574	b1453	0.164313	0.646137		15574	b1453	0.069687	0.236721			15574	b1453	0.157757	0.48485		15574	b1453	0.0591761	0.215629		15574	b1453	0.135017	0.540178			15574	b1453	0.0679022	0.253788		15574	b1453	0.117795	0.352923		15574	b1453	-0.0482931	-0.135976
15577	b1456	0.0959749	0.419556		15577	b1456	-0.0711631	-0.315301		15577	b1456	0.0833633	0.399333			15577	b1456	-0.0611348	-0.267938		15577	b1456	-0.0394344	-0.193562		15577	b1456	0.00369104	0.0173962			15577	b1456	0.117885	0.551113		15577	b1456	0.170515	0.833401		15577	b1456	-0.0890225	-0.394755
15582	b1461	0.0497654	0.13084		15582	b1461	0.236317	0.620929		15582	b1461	-0.0138484	-0.0396136			15582	b1461	0.156529	0.386571		15582	b1461	-0.013341	-0.0330012		15582	b1461	0.0390184	0.0987411			15582	b1461	0.10075	0.239396		15582	b1461	0.114991	0.338975		15582	b1461	0.00846056	0.0196729
15583	b1462	0.431289	1.02815		15583	b1462	0.368628	0.728971		15583	b1462	0.291466	0.713912			15583	b1462	0.618891	1.77297		15583	b1462	0.137218	0.330636		15583	b1462	0.399537	0.91764			15583	b1462	0.260758	0.595625		15583	b1462	0.453197	1.08715		15583	b1462	0.330192	0.790136
15584	b1463	0.107151	0.53662		15584	b1463	0.0880012	0.438937		15584	b1463	0.0778833	0.38284			15584	b1463	0.176468	0.81439		15584	b1463	0.0269526	0.100873		15584	b1463	0.176423	0.775798			15584	b1463	0.169117	0.682262		15584	b1463	0.0961807	0.388056		15584	b1463	0.154241	0.668726
15585	b1464	-0.144747	-0.558766		15585	b1464	-0.164134	-0.55079		15585	b1464	-0.109401	-0.428196			15585	b1464	-0.199397	-0.734663		15585	b1464	-0.105297	-0.435714		15585	b1464	-0.189211	-0.686489			15585	b1464	-0.240005	-0.753913		15585	b1464	-0.138378	-0.48835		15585	b1464	-0.0850009	-0.29535
15586	b1465	-0.657716	-1.44919		15586	b1465	-0.555567	-1.25353		15586	b1465	-0.718921	-1.60179			15586	b1465	-0.588772	-1.33346		15586	b1465	-0.499003	-1.11469		15586	b1465	-0.889866	-1.96869			15586	b1465	-0.694334	-1.45434		15586	b1465	-0.728054	-1.69217		15586	b1465	-0.636631	-1.42145
15587	b1466	0.57552	2.82494		15587	b1466	0.526266	2.52965		15587	b1466	0.500243	2.9235			15587	b1466	0.518202	2.84262		15587	b1466	0.533602	2.77845		15587	b1466	0.54918	3.19574			15587	b1466	0.294557	1.16394		15587	b1466	0.533417	2.87395		15587	b1466	0.552849	2.7005
15588	b1467	0.17901	1.04496		15588	b1467	0.170463	0.846131		15588	b1467	0.115792	0.626429			15588	b1467	0.0540317	0.265905		15588	b1467	0.196014	1.00246		15588	b1467	0.112044	0.639609			15588	b1467	0.000530719	0.00319082		15588	b1467	0.0487613	0.254443		15588	b1467	0.112068	0.593038
15589	b1468	0.0079579	0.0436581		15589	b1468	-0.0403307	-0.256455		15589	b1468	-0.0251941	-0.14891			15589	b1468	-0.076927	-0.482336		15589	b1468	0.0138977	0.078131		15589	b1468	-0.00594004	-0.0355994			15589	b1468	-0.0491823	-0.282602		15589	b1468	0.0146793	0.0913679		15589	b1468	0.0719818	0.411322
15590	b1469	-0.0716906	-0.248049		15590	b1469	-0.13638	-0.398089		15590	b1469	-0.32209	-1.04039			15590	b1469	-0.0248721	-0.0904129		15590	b1469	-0.130858	-0.39262		15590	b1469	-0.133066	-0.391214			15590	b1469	-0.268092	-0.782521		15590	b1469	-0.0995846	-0.284782		15590	b1469	-0.0882603	-0.27764
15594	b1473	-0.0445656	-0.222966		15594	b1473	-0.150858	-0.791501		15594	b1473	-0.181228	-0.886975			15594	b1473	-0.125416	-0.637048		15594	b1473	-0.0862595	-0.434611		15594	b1473	-0.0571051	-0.287678			15594	b1473	-0.190628	-0.920029		15594	b1473	-0.116838	-0.58088		15594	b1473	0.0309383	0.169008
15595	b1474	0.202024	0.822919		15595	b1474	0.21797	0.937774		15595	b1474	0.0969484	0.423349			15595	b1474	0.234504	0.943247		15595	b1474	0.137413	0.542513		15595	b1474	0.157737	0.658568			15595	b1474	0.177456	0.793455		15595	b1474	0.214846	0.994464		15595	b1474	0.208933	0.873031
15596	b1475	-0.030622	-0.168479		15596	b1475	-0.258708	-1.40587		15596	b1475	-0.126144	-0.568465			15596	b1475	-0.188212	-0.850937		15596	b1475	-0.182831	-1.01023		15596	b1475	-0.113708	-0.559699			15596	b1475	-0.116185	-0.643152		15596	b1475	-0.175852	-1.04168		15596	b1475	-0.0516273	-0.277665
15599	b1478	-0.00701859	-0.0214892		15599	b1478	-0.118698	-0.256926		15599	b1478	-0.154832	-0.302791			15599	b1478	-0.0324947	-0.0686524		15599	b1478	0.0524918	0.103797		15599	b1478	-0.193903	-0.437268			15599	b1478	-0.116781	-0.356995		15599	b1478	-0.114752	-0.234182		15599	b1478	-0.0149694	-0.0323818
15600	b1479	0.0236222	0.111135		15600	b1479	0.0164135	0.084406		15600	b1479	-0.107781	-0.558156			15600	b1479	-0.147866	-0.675394		15600	b1479	-0.130371	-0.702986		15600	b1479	-0.18889	-0.932218			15600	b1479	0.0976233	0.415775		15600	b1479	-0.10166	-0.502647		15600	b1479	-0.061251	-0.323726
15602	b1481	0.150326	0.388589		15602	b1481	0.154196	0.580297		15602	b1481	0.16115	0.50825			15602	b1481	0.0335415	0.0955068		15602	b1481	0.250453	0.725763		15602	b1481	0.340515	0.885479			15602	b1481	0.237896	0.878353		15602	b1481	0.0972042	0.311544		15602	b1481	0.115459	0.348799
15604	b1483	0.236136	0.831872		15604	b1483	0.151529	0.481713		15604	b1483	0.12351	0.410931			15604	b1483	0.235453	1.00894		15604	b1483	0.173858	0.58676		15604	b1483	0.173306	0.600614			15604	b1483	0.191003	0.696492		15604	b1483	0.128083	0.426739		15604	b1483	0.157956	0.580734
15605	b1484	0.260782	0.986412		15605	b1484	0.221129	1.01191		15605	b1484	0.128559	0.483466			15605	b1484	0.293801	1.31156		15605	b1484	0.235155	0.914647		15605	b1484	0.187042	0.698096			15605	b1484	0.0321441	0.169949		15605	b1484	0.161018	0.672633		15605	b1484	0.134442	0.506491
15608	b1487	0.361707	1.14367		15608	b1487	0.359815	1.26393		15608	b1487	0.195916	0.635669			15608	b1487	0.180754	0.566804		15608	b1487	0.330563	0.95044		15608	b1487	0.419603	1.05901			15608	b1487	0.260108	0.868685		15608	b1487	0.420798	1.26759		15608	b1487	0.44275	1.52496
15609	b1488	0.287222	0.73583		15609	b1488	0.490093	1.12708		15609	b1488	0.409643	1.14358			15609	b1488	0.388698	0.873468		15609	b1488	0.332591	0.750654		15609	b1488	0.384034	0.945513			15609	b1488	0.487614	1.11541		15609	b1488	0.422519	1.28464		15609	b1488	0.261312	0.689005
15610	b1489	-0.340208	-1.30295		15610	b1489	-0.491572	-2.16751		15610	b1489	-0.383843	-1.63986			15610	b1489	-0.272981	-1.11966		15610	b1489	-0.470245	-2.18345		15610	b1489	-0.363176	-1.44435			15610	b1489	-0.353849	-1.18008		15610	b1489	-0.373271	-1.75382		15610	b1489	-0.305811	-1.29184
15611	b1490	0.212233	0.859999		15611	b1490	-0.0185686	-0.073473		15611	b1490	0.0620697	0.235739			15611	b1490	0.069739	0.276557		15611	b1490	0.131337	0.511679		15611	b1490	0.168864	0.677601			15611	b1490	-0.0724512	-0.205374		15611	b1490	0.0624485	0.209132		15611	b1490	0.0651151	0.225051
15612	b1491	0.0692396	0.277108		15612	b1491	0.259686	0.91807		15612	b1491	0.182741	0.760153			15612	b1491	0.325025	1.33104		15612	b1491	0.154689	0.674123		15612	b1491	0.170192	0.724432			15612	b1491	0.233675	1.05505		15612	b1491	0.201499	0.876898		15612	b1491	0.211568	0.857434
15613	b1492	0.308935	1.84239		15613	b1492	0.162732	0.894329		15613	b1492	0.157988	0.887278			15613	b1492	0.272663	1.54695		15613	b1492	0.0228278	0.138273		15613	b1492	0.246735	1.46741			15613	b1492	0.35888	2.33565		15613	b1492	0.23225	1.46041		15613	b1492	0.206097	1.22904
15615	b1494	0.190648	1.07525		15615	b1494	0.118868	0.660221		15615	b1494	0.0601567	0.34858			15615	b1494	0.0193191	0.106407		15615	b1494	0.114318	0.63433		15615	b1494	0.0596064	0.320822			15615	b1494	0.0628279	0.348025		15615	b1494	0.0390771	0.205341		15615	b1494	0.111417	0.603253
15616	b1495	-0.329852	-1.61098		15616	b1495	-0.281323	-1.47632		15616	b1495	-0.409379	-1.93248			15616	b1495	-0.362572	-1.78234		15616	b1495	-0.188429	-0.996116		15616	b1495	-0.349516	-1.66976			15616	b1495	-0.178459	-0.879418		15616	b1495	-0.384782	-1.9473		15616	b1495	-0.307327	-1.56952
15617	b1496	-0.663243	-2.37528		15617	b1496	-0.549608	-1.80872		15617	b1496	-0.576047	-2.10093			15617	b1496	-0.572422	-1.88173		15617	b1496	-0.774683	-2.21606		15617	b1496	-0.754498	-2.33912			15617	b1496	-0.389937	-1.28307		15617	b1496	-0.787465	-2.46642		15617	b1496	-0.770061	-2.48926
15619	b1498	-0.58042	-1.76571		15619	b1498	-0.488594	-1.72949		15619	b1498	-0.583039	-2.0275			15619	b1498	-0.569278	-1.73757		15619	b1498	-0.570884	-2.08161		15619	b1498	-0.571729	-1.75746			15619	b1498	-0.445636	-1.34981		15619	b1498	-0.704877	-2.11195		15619	b1498	-0.432848	-1.33601
15622	b1501	0.102245	0.451344		15622	b1501	0.138436	0.710103		15622	b1501	0.0634057	0.321543			15622	b1501	0.142263	0.723319		15622	b1501	-0.0304305	-0.15492		15622	b1501	0.0470895	0.231238			15622	b1501	0.0411391	0.219532		15622	b1501	0.0235631	0.119064		15622	b1501	0.0738391	0.378563
15625	b1504	0.264253	0.810739		15625	b1504	0.205496	0.567231		15625	b1504	-0.0974969	-0.251726			15625	b1504	0.0618757	0.166531		15625	b1504	0.253867	0.694018		15625	b1504	0.035077	0.0918779			15625	b1504	0.0380907	0.0985675		15625	b1504	0.138836	0.464704		15625	b1504	0.0965235	0.310442
15628	b1507	-0.00431359	-0.0144755		15628	b1507	0.0751575	0.295161		15628	b1507	-0.0585042	-0.211054			15628	b1507	0.0988508	0.430709		15628	b1507	-0.105026	-0.380313		15628	b1507	-0.0441156	-0.150175			15628	b1507	0.282196	0.821867		15628	b1507	-0.0449307	-0.160237		15628	b1507	0.0893618	0.301322
15632	b1511	-0.075305	-0.386766		15632	b1511	0.0255624	0.107215		15632	b1511	0.151107	0.884353			15632	b1511	0.105537	0.530972		15632	b1511	0.0928074	0.408048		15632	b1511	-0.0760062	-0.350532			15632	b1511	-0.267565	-0.958382		15632	b1511	0.0761744	0.419304		15632	b1511	0.0671494	0.367496
15633	b1512	0.609896	1.39984		15633	b1512	0.274943	0.652927		15633	b1512	0.52669	1.31126			15633	b1512	0.519451	1.2523		15633	b1512	0.302747	0.765409		15633	b1512	0.408246	0.940815			15633	b1512	0.537786	1.28447		15633	b1512	0.23884	0.555496		15633	b1512	0.290093	0.659799
15634	b1513	-0.133231	-0.336782		15634	b1513	0.186803	0.512576		15634	b1513	-0.0504765	-0.127977			15634	b1513	-0.117577	-0.301797		15634	b1513	-0.099294	-0.277935		15634	b1513	0.00475183	0.0118171			15634	b1513	-0.0939567	-0.313113		15634	b1513	-0.118629	-0.37327		15634	b1513	-0.0842687	-0.230632
15636	b1515	0.124737	0.441237		15636	b1515	0.144458	0.557587		15636	b1515	0.0106217	0.0482623			15636	b1515	0.104548	0.438883		15636	b1515	0.057233	0.256534		15636	b1515	0.0427744	0.195998			15636	b1515	0.128683	0.485572		15636	b1515	0.1335	0.596532		15636	b1515	-0.0840973	-0.392878
15637	b1516	0.173702	0.400618		15637	b1516	-0.0275926	-0.0726731		15637	b1516	-0.139531	-0.295858			15637	b1516	0.172976	0.417408		15637	b1516	0.193585	0.397704		15637	b1516	-0.014118	-0.0315293			15637	b1516	-0.0363953	-0.0833749		15637	b1516	0.0140824	0.0321173		15637	b1516	0.00447289	0.00989131
15638	b1517	0.072399	0.344491		15638	b1517	-0.069037	-0.280626		15638	b1517	0.07498	0.334465			15638	b1517	-0.0778006	-0.362287		15638	b1517	0.10429	0.558644		15638	b1517	0.00233845	0.0104247			15638	b1517	0.10664	0.5234		15638	b1517	0.0416281	0.182889		15638	b1517	0.044959	0.190169
15639	b1518	-0.700356	-1.80136		15639	b1518	-0.714641	-1.87998		15639	b1518	-0.55999	-1.27165			15639	b1518	-0.783414	-1.62859		15639	b1518	-1.13005	-2.59095		15639	b1518	-0.840741	-2.17872			15639	b1518	-1.00291	-2.11114		15639	b1518	-0.942921	-2.51346		15639	b1518	-0.931513	-2.27499
15640	b1519	0.510113	2.01641		15640	b1519	0.44586	1.65316		15640	b1519	0.437114	1.23308			15640	b1519	0.456233	1.48386		15640	b1519	0.26779	0.905923		15640	b1519	0.510748	1.76494			15640	b1519	0.29808	0.805454		15640	b1519	0.375358	1.35778		15640	b1519	0.46433	1.4783
15641	b1520	-0.423851	-1.36667		15641	b1520	-0.0651845	-0.205703		15641	b1520	-0.483898	-1.31036			15641	b1520	-0.336781	-0.742788		15641	b1520	-0.508	-1.65007		15641	b1520	-0.250073	-0.606926			15641	b1520	0.0318634	0.0770828		15641	b1520	-0.336273	-1.07049		15641	b1520	-0.0945895	-0.279338
15643	b1522	0.0299724	0.145238		15643	b1522	0.11857	0.645141		15643	b1522	0.00313477	0.016664			15643	b1522	0.121203	0.656334		15643	b1522	0.115034	0.605099		15643	b1522	0.0774393	0.338984			15643	b1522	0.395382	2.09826		15643	b1522	0.111083	0.586111		15643	b1522	0.134696	0.599441
15646	b1525	-0.0259655	-0.0932199		15646	b1525	0.206048	0.880282		15646	b1525	0.2811	1.05309			15646	b1525	0.147865	0.625561		15646	b1525	0.222484	1.00026		15646	b1525	0.140946	0.646641			15646	b1525	0.0673273	0.269719		15646	b1525	0.225148	0.945345		15646	b1525	0.319138	1.18242
15647	b1526	-0.205654	-0.636624		15647	b1526	-0.0309216	-0.118181		15647	b1526	-0.355031	-0.834739			15647	b1526	-0.0465626	-0.130241		15647	b1526	-0.194322	-0.591027		15647	b1526	-0.0784026	-0.172123			15647	b1526	-0.356362	-1.18998		15647	b1526	-0.23777	-0.709747		15647	b1526	-0.147084	-0.442094
15649	b1528	-0.00239804	-0.00712078		15649	b1528	0.0126058	0.0354872		15649	b1528	0.0618074	0.188151			15649	b1528	0.128474	0.383018		15649	b1528	-0.000441533	-0.00119584		15649	b1528	-0.0340759	-0.102954			15649	b1528	-0.0656208	-0.197789		15649	b1528	0.107727	0.345373		15649	b1528	0.0902599	0.285787
15655	b1534	0.0367852	0.140451		15655	b1534	-0.0260027	-0.105121		15655	b1534	0.00541313	0.0215104			15655	b1534	-0.0167351	-0.0702168		15655	b1534	-0.0320031	-0.118745		15655	b1534	-0.0716298	-0.277285			15655	b1534	-0.210764	-0.88784		15655	b1534	-0.0591061	-0.243586		15655	b1534	-0.0146108	-0.067361
15656	b1535	-0.270311	-0.804089		15656	b1535	-0.0713091	-0.217682		15656	b1535	-0.313049	-0.960794			15656	b1535	-0.312207	-0.960662		15656	b1535	-0.253501	-0.763562		15656	b1535	-0.322605	-1.00965			15656	b1535	-0.352931	-1.01545		15656	b1535	-0.095808	-0.284738		15656	b1535	-0.204855	-0.52631
15659	b1537	-0.181155	-0.678513		15659	b1537	-0.0131932	-0.0456824		15659	b1537	-0.106928	-0.382632			15659	b1537	-0.0888712	-0.325712		15659	b1537	-0.00187223	-0.0070322		15659	b1537	-0.00458916	-0.0160206			15659	b1537	-0.198876	-0.576756		15659	b1537	-0.00166517	-0.00592346		15659	b1537	-0.0515249	-0.183284
15660	b1538	-0.11471	-0.631714		15660	b1538	-0.118143	-0.643766		15660	b1538	-0.1228	-0.654926			15660	b1538	-0.0563408	-0.305944		15660	b1538	-0.0483161	-0.258294		15660	b1538	-0.0932314	-0.525021			15660	b1538	-0.117867	-0.579177		15660	b1538	-0.11908	-0.601913		15660	b1538	-0.0667293	-0.357436
15661	b1539	-0.323887	-1.01928		15661	b1539	-0.185887	-0.558617		15661	b1539	-0.185552	-0.500182			15661	b1539	-0.254647	-0.867939		15661	b1539	-0.301608	-0.981243		15661	b1539	-0.321019	-0.904167			15661	b1539	-0.305245	-0.887527		15661	b1539	-0.502695	-1.48087		15661	b1539	-0.240755	-0.658446
15664	b1542	0.334604	0.961748		15664	b1542	0.443106	1.37781		15664	b1542	0.0871285	0.167127			15664	b1542	0.354111	1.13448		15664	b1542	0.330815	0.902891		15664	b1542	0.463267	1.35374			15664	b1542	0.0740949	0.215186		15664	b1542	0.465091	1.51099		15664	b1542	0.372887	1.14302
15669	b1547	-0.0128973	-0.0461914		15669	b1547	-0.137017	-0.556015		15669	b1547	0.144554	0.654957			15669	b1547	-0.121202	-0.540424		15669	b1547	-0.0555744	-0.239293		15669	b1547	-0.109367	-0.401893			15669	b1547	0.197469	0.647243		15669	b1547	-0.204429	-0.740797		15669	b1547	0.0899978	0.358259
15681	b1559	0.350339	1.24743		15681	b1559	0.285697	1.12081		15681	b1559	0.271362	1.22434			15681	b1559	0.374246	1.62152		15681	b1559	0.350951	1.39814		15681	b1559	0.345165	1.33331			15681	b1559	0.393775	1.53325		15681	b1559	0.322277	1.48591		15681	b1559	0.31171	1.17267
15682	b1560	-0.0837859	-0.334636		15682	b1560	-0.134505	-0.435546		15682	b1560	-0.00718482	-0.0215345			15682	b1560	-0.0426064	-0.123994		15682	b1560	-0.126784	-0.44535		15682	b1560	-0.140727	-0.452416			15682	b1560	-0.256504	-0.957486		15682	b1560	-0.0319343	-0.115022		15682	b1560	0.0842411	0.283924
15684	b1562	0.244776	0.608419		15684	b1562	0.232013	0.587995		15684	b1562	-0.0760461	-0.187259			15684	b1562	0.138335	0.352114		15684	b1562	0.114728	0.286663		15684	b1562	0.216797	0.542523			15684	b1562	0.235871	0.562328		15684	b1562	0.0883813	0.229225		15684	b1562	0.110658	0.273721
15687	b1565	-0.00482243	-0.0129056		15687	b1565	-0.202469	-0.611591		15687	b1565	-0.00904972	-0.0262271			15687	b1565	0.010802	0.0383539		15687	b1565	-0.0656783	-0.20884		15687	b1565	-0.195549	-0.521614			15687	b1565	-0.0940436	-0.269334		15687	b1565	-0.156542	-0.436775		15687	b1565	-0.144774	-0.4007
15688	b1566	-0.867216	-2.55874		15688	b1566	-0.666602	-1.60349		15688	b1566	-0.617245	-1.79876			15688	b1566	-0.659364	-1.85024		15688	b1566	-0.60797	-1.69747		15688	b1566	-1.07636	-2.96916			15688	b1566	-0.592224	-1.09147		15688	b1566	-0.828912	-1.89732		15688	b1566	-0.797237	-1.91005
15691	b1569	-0.259592	-1.03063		15691	b1569	-0.447749	-1.55078		15691	b1569	-0.260988	-0.940046			15691	b1569	-0.338423	-0.993386		15691	b1569	-0.277801	-1.12201		15691	b1569	-0.315596	-1.34038			15691	b1569	-0.229637	-0.538021		15691	b1569	-0.402169	-1.7119		15691	b1569	-0.45906	-1.73078
15698	b1577	-0.083712	-0.312766		15698	b1577	0.0226904	0.0865301		15698	b1577	-0.055128	-0.193541			15698	b1577	0.0594576	0.199645		15698	b1577	0.105042	0.481202		15698	b1577	-0.148597	-0.533683			15698	b1577	-0.145061	-0.523729		15698	b1577	-0.0268835	-0.106375		15698	b1577	0.0264131	0.0918374
15701	b1580	0.213786	0.774349		15701	b1580	0.289044	1.15404		15701	b1580	0.136052	0.522351			15701	b1580	0.433492	1.80508		15701	b1580	0.247636	0.775708		15701	b1580	0.254266	0.951625			15701	b1580	0.00523703	0.0177558		15701	b1580	0.304755	1.26231		15701	b1580	0.261094	1.00436
15702	b1581	-0.0868978	-0.2637		15702	b1581	-0.286003	-0.857382		15702	b1581	-0.12079	-0.317278			15702	b1581	-0.262549	-0.710634		15702	b1581	-0.0939219	-0.2642		15702	b1581	-0.221253	-0.643236			15702	b1581	0.0593216	0.177081		15702	b1581	-0.0640555	-0.191273		15702	b1581	-0.172923	-0.52865
15703	b1582	-0.0306599	-0.0867687		15703	b1582	-0.209706	-0.60185		15703	b1582	-0.453375	-1.00998			15703	b1582	-0.315287	-0.93043		15703	b1582	-0.143396	-0.273414		15703	b1582	-0.086724	-0.254541			15703	b1582	-0.575641	-1.51448		15703	b1582	-0.179861	-0.456615		15703	b1582	-0.183022	-0.519971
15705	b1584	0.0574995	0.28645		15705	b1584	0.0676813	0.347201		15705	b1584	-0.108292	-0.594834			15705	b1584	0.00803264	0.0397224		15705	b1584	-0.061476	-0.307124		15705	b1584	-0.0209409	-0.110236			15705	b1584	0.015081	0.0684904		15705	b1584	-0.0254655	-0.134899		15705	b1584	-0.0151743	-0.0795727
15706	b1585	-0.201804	-0.904698		15706	b1585	-0.0184803	-0.0676091		15706	b1585	-0.0950347	-0.382305			15706	b1585	-0.160917	-0.649139		15706	b1585	-0.173431	-0.669127		15706	b1585	-0.127836	-0.565021			15706	b1585	-0.0809308	-0.351411		15706	b1585	-0.064882	-0.249317		15706	b1585	-0.131888	-0.567343
15707	b1586	0.196345	0.825209		15707	b1586	0.227251	1.00388		15707	b1586	0.0285257	0.105807			15707	b1586	0.387528	1.85477		15707	b1586	0.0497479	0.192746		15707	b1586	0.144154	0.578318			15707	b1586	0.100937	0.324665		15707	b1586	0.154115	0.629765		15707	b1586	0.225411	0.82779
15708	b1587	-0.133923	-0.918719		15708	b1587	-0.126435	-0.863074		15708	b1587	-0.151033	-1.03943			15708	b1587	-0.0629354	-0.405015		15708	b1587	-0.0681111	-0.441106		15708	b1587	-0.0606466	-0.425328			15708	b1587	-0.0556403	-0.326702		15708	b1587	-0.0584163	-0.384453		15708	b1587	-0.106791	-0.6761
15709	b1588	-0.010217	-0.0390585		15709	b1588	0.109558	0.318201		15709	b1588	-0.00542708	-0.019164			15709	b1588	0.0524812	0.197914		15709	b1588	0.110185	0.367575		15709	b1588	0.124702	0.491475			15709	b1588	0.152516	0.465496		15709	b1588	0.000977475	0.00316003		15709	b1588	0.232966	0.761578
15710	b1589	-0.396924	-1.33295		15710	b1589	-0.110668	-0.43807		15710	b1589	-0.32522	-1.01259			15710	b1589	-0.24505	-0.921426		15710	b1589	-0.22222	-0.844254		15710	b1589	-0.276002	-1.11596			15710	b1589	-0.0847048	-0.337326		15710	b1589	-0.187184	-0.73474		15710	b1589	-0.32382	-1.08328
15711	b1590	0.150629	0.478354		15711	b1590	0.235203	0.861033		15711	b1590	0.24472	0.80438			15711	b1590	0.118087	0.495185		15711	b1590	0.183894	0.704474		15711	b1590	0.242142	0.871402			15711	b1590	0.389762	1.33168		15711	b1590	0.350458	1.27567		15711	b1590	0.271725	1.08607
15713	b1592	0.0259342	0.113197		15713	b1592	0.0776468	0.350713		15713	b1592	0.100316	0.444177			15713	b1592	0.00745737	0.0275703		15713	b1592	0.0181978	0.0909659		15713	b1592	-0.0201157	-0.0930683			15713	b1592	-0.118574	-0.55837		15713	b1592	0.0225964	0.102623		15713	b1592	-0.0205726	-0.0869306
15714	b1593	0.36335	0.904683		15714	b1593	0.374735	1.27031		15714	b1593	0.2765	0.747264			15714	b1593	0.362257	1.19918		15714	b1593	0.36124	0.856972		15714	b1593	0.298119	0.630437			15714	b1593	0.315472	0.662758		15714	b1593	0.322748	0.995996		15714	b1593	0.33826	0.821945
15717	b1596	-0.0211677	-0.119506		15717	b1596	-0.117709	-0.603588		15717	b1596	-0.056401	-0.301705			15717	b1596	-0.173839	-0.898471		15717	b1596	-0.0898374	-0.42551		15717	b1596	-0.040245	-0.205699			15717	b1596	0.00324252	0.0174798		15717	b1596	-0.0307912	-0.160431		15717	b1596	-0.120442	-0.599052
15718	b1597	-0.146693	-0.494397		15718	b1597	-0.0789968	-0.202013		15718	b1597	0.0770712	0.218087			15718	b1597	-0.113159	-0.412673		15718	b1597	-0.275073	-0.786115		15718	b1597	-0.101896	-0.278157			15718	b1597	-0.0732508	-0.231942		15718	b1597	-0.0570975	-0.175404		15718	b1597	-0.270206	-0.811614
15719	b1598	0.45995	2.32374		15719	b1598	0.365389	2.1701		15719	b1598	0.335188	2.01684			15719	b1598	0.397468	2.34837		15719	b1598	0.305935	1.66353		15719	b1598	0.317311	1.53878			15719	b1598	0.654724	3.91628		15719	b1598	0.373319	2.04884		15719	b1598	0.359124	2.16954
15722	b1601	0.329506	0.995538		15722	b1601	0.259509	0.978571		15722	b1601	0.281605	0.959959			15722	b1601	0.283886	1.04619		15722	b1601	0.392302	1.26094		15722	b1601	0.290936	0.980357			15722	b1601	0.152825	0.573894		15722	b1601	0.396714	1.29272		15722	b1601	0.378413	1.45111
15723	b1602	0.255156	0.679063		15723	b1602	0.298693	0.722717		15723	b1602	0.17862	0.449771			15723	b1602	0.135452	0.329614		15723	b1602	0.162199	0.379901		15723	b1602	0.134764	0.352049			15723	b1602	0.332488	1.08691		15723	b1602	0.0378098	0.0876072		15723	b1602	0.19115	0.442821
15724	b1603	0.18017	0.607212		15724	b1603	0.311086	1.11265		15724	b1603	0.391929	1.26515			15724	b1603	0.100119	0.437819		15724	b1603	0.3404	1.08074		15724	b1603	0.172579	0.64072			15724	b1603	0.193499	0.561552		15724	b1603	0.246929	0.788348		15724	b1603	0.328348	1.1684
15725	b1604	-0.174382	-0.663193		15725	b1604	-0.282454	-0.987336		15725	b1604	-0.202333	-0.742741			15725	b1604	-0.388784	-1.19		15725	b1604	-0.428242	-1.17458		15725	b1604	-0.286046	-1.06882			15725	b1604	-0.298501	-1.19246		15725	b1604	-0.311593	-1.04571		15725	b1604	-0.0777556	-0.28224
15726	b1605	0.199004	1.09282		15726	b1605	0.189374	1.03132		15726	b1605	0.241282	1.29448			15726	b1605	0.324515	1.64794		15726	b1605	0.228213	1.07307		15726	b1605	0.248558	1.39268			15726	b1605	0.340349	1.74518		15726	b1605	0.388865	1.90489		15726	b1605	0.275025	1.53365
15727	b1606	0.374867	1.78077		15727	b1606	0.440153	2.13998		15727	b1606	0.421305	2.09275			15727	b1606	0.284913	1.40691		15727	b1606	0.455839	2.36076		15727	b1606	0.477039	2.32222			15727	b1606	0.303317	1.44837		15727	b1606	0.472206	2.31831		15727	b1606	0.423652	1.9914
15729	b1608	-0.124213	-0.330835		15729	b1608	-0.00951368	-0.0248949		15729	b1608	-0.123881	-0.284995			15729	b1608	-0.178749	-0.37805		15729	b1608	-0.10935	-0.244532		15729	b1608	-0.0912964	-0.202949			15729	b1608	-0.0830615	-0.228259		15729	b1608	-0.119729	-0.263756		15729	b1608	-0.196547	-0.456627
15730	b1609	-0.0367241	-0.142806		15730	b1609	-0.167486	-0.461472		15730	b1609	0.0140378	0.0403288			15730	b1609	0.110783	0.383701		15730	b1609	0.0477193	0.156539		15730	b1609	-0.00109907	-0.00357885			15730	b1609	-0.00229618	-0.00778409		15730	b1609	-0.011691	-0.0405564		15730	b1609	-0.0170413	-0.0533827
15731	b1610	0.0434022	0.175594		15731	b1610	-0.0551728	-0.214335		15731	b1610	0.0504573	0.206104			15731	b1610	0.150577	0.664874		15731	b1610	-0.0749557	-0.299251		15731	b1610	0.161427	0.650407			15731	b1610	0.0537451	0.26246		15731	b1610	-0.0213569	-0.085222		15731	b1610	0.00606162	0.0271733
15732	b1611	-0.0779381	-0.297107		15732	b1611	0.0709642	0.36225		15732	b1611	0.0954175	0.389513			15732	b1611	-0.0210865	-0.086387		15732	b1611	-0.00287895	-0.0117966		15732	b1611	0.0434044	0.18954			15732	b1611	-0.114334	-0.471677		15732	b1611	0.117333	0.494314		15732	b1611	-0.0137365	-0.0514919
15735	b1614	0.0409567	0.162676		15735	b1614	0.0442394	0.169102		15735	b1614	0.0825495	0.399035			15735	b1614	0.159977	0.755844		15735	b1614	0.0438643	0.188422		15735	b1614	0.184018	0.904158			15735	b1614	-0.123057	-0.49719		15735	b1614	0.0574687	0.176333		15735	b1614	0.0366458	0.170331
15736	b1615	-0.126363	-0.464485		15736	b1615	-0.166553	-0.539672		15736	b1615	-0.262742	-0.827195			15736	b1615	-0.46078	-1.61208		15736	b1615	-0.013341	-0.0423228		15736	b1615	-0.273409	-1.02748			15736	b1615	-0.197975	-0.688863		15736	b1615	-0.408688	-1.5002		15736	b1615	-0.279429	-1.02662
15737	b1616	-0.0899257	-0.521716		15737	b1616	-0.0896507	-0.543994		15737	b1616	-0.0741028	-0.405824			15737	b1616	-0.195025	-1.07099		15737	b1616	-0.19005	-1.07677		15737	b1616	-0.072628	-0.408871			15737	b1616	-0.169882	-0.841843		15737	b1616	-0.0660348	-0.376976		15737	b1616	-0.15102	-0.796516
15738	b1617	-0.0836954	-0.41428		15738	b1617	-0.0408148	-0.190949		15738	b1617	0.0601358	0.27661			15738	b1617	0.00925414	0.041462		15738	b1617	0.195087	0.85675		15738	b1617	0.0857098	0.423347			15738	b1617	-0.123856	-0.501684		15738	b1617	0.0330648	0.154347		15738	b1617	0.122472	0.619448
15739	b1618	-0.412187	-1.2625		15739	b1618	-0.268906	-0.807578		15739	b1618	-0.600952	-1.87793			15739	b1618	-0.578109	-2.30267		15739	b1618	-0.562631	-2.46516		15739	b1618	-0.299558	-1.33156			15739	b1618	-0.404641	-1.6915		15739	b1618	-0.446286	-1.82724		15739	b1618	-0.527573	-1.485
15740	b1619	-0.181476	-0.713977		15740	b1619	-0.12974	-0.526917		15740	b1619	-0.24205	-0.965745			15740	b1619	-0.172259	-0.683682		15740	b1619	-0.17189	-0.696846		15740	b1619	-0.229213	-0.967914			15740	b1619	-0.225339	-0.879588		15740	b1619	-0.164901	-0.688631		15740	b1619	-0.21032	-0.812759
15742	b1621	-0.047736	-0.163415		15742	b1621	-0.174586	-0.452011		15742	b1621	-0.170672	-0.574837			15742	b1621	-0.242279	-0.701089		15742	b1621	-0.155325	-0.518181		15742	b1621	-0.179238	-0.581826			15742	b1621	-0.212515	-0.623892		15742	b1621	0.129735	0.493823		15742	b1621	0.0133657	0.0433862
15743	b1622	0.000327561	0.00158032		15743	b1622	-0.0131932	-0.0444747		15743	b1622	0.0561374	0.251588			15743	b1622	-0.0298614	-0.121648		15743	b1622	0.15533	0.755868		15743	b1622	0.197313	0.757337			15743	b1622	0.0887128	0.307029		15743	b1622	-0.0118752	-0.04536		15743	b1622	-0.00531309	-0.0184165
15744	b1623	0.113651	0.427401		15744	b1623	-0.00619795	-0.0288471		15744	b1623	-0.06497	-0.285558			15744	b1623	-0.00630687	-0.0260885		15744	b1623	-0.0869349	-0.429738		15744	b1623	0.0238693	0.121189			15744	b1623	0.111833	0.478459		15744	b1623	-0.0173651	-0.0902704		15744	b1623	0.0500948	0.215962
15745	b1624	-0.138028	-0.755465		15745	b1624	-0.121585	-0.659109		15745	b1624	-0.26347	-1.44942			15745	b1624	-0.29676	-1.58384		15745	b1624	-0.316562	-1.64587		15745	b1624	-0.115864	-0.616513			15745	b1624	-0.0862977	-0.429777		15745	b1624	-0.202452	-1.07695		15745	b1624	-0.226775	-1.25301
15746	b1625	-0.130024	-0.575223		15746	b1625	-0.177359	-0.881266		15746	b1625	-0.233389	-1.03227			15746	b1625	-0.506476	-1.88819		15746	b1625	-0.229208	-0.991277		15746	b1625	-0.25355	-1.05448			15746	b1625	-0.241502	-0.985129		15746	b1625	-0.171184	-0.73065		15746	b1625	-0.248563	-0.933901
15747	b1626	-0.394894	-1.87417		15747	b1626	-0.372961	-1.92417		15747	b1626	-0.459069	-2.22496			15747	b1626	-0.394034	-2.02589		15747	b1626	-0.209462	-0.991726		15747	b1626	-0.191164	-0.963708			15747	b1626	-0.484672	-2.51734		15747	b1626	-0.448291	-2.26446		15747	b1626	-0.515579	-2.65315
15748	b1627	-0.0159335	-0.0513008		15748	b1627	-0.151462	-0.473609		15748	b1627	0.0636394	0.254161			15748	b1627	0.0383889	0.143109		15748	b1627	0.259777	0.85135		15748	b1627	0.236889	0.966308			15748	b1627	0.047081	0.134377		15748	b1627	0.0137829	0.0549328		15748	b1627	0.00847682	0.0339098
15749	b1628	-0.0347035	-0.0536602		15749	b1628	0.338847	0.626367		15749	b1628	-0.157666	-0.208912			15749	b1628	0.067146	0.149217		15749	b1628	0.419297	0.767716		15749	b1628	0.14408	0.220863			15749	b1628	-0.171473	-0.200519		15749	b1628	0.268241	0.45422		15749	b1628	0.0763822	0.121389
15750	b1629	0.241935	0.993045		15750	b1629	0.252628	1.02368		15750	b1629	0.227763	0.894596			15750	b1629	0.25989	0.95227		15750	b1629	0.325454	1.4551		15750	b1629	0.296325	1.16318			15750	b1629	0.265068	1.30674		15750	b1629	0.166223	0.610887		15750	b1629	0.229206	0.845799
15751	b1630	0.512986	1.94353		15751	b1630	0.291084	0.991577		15751	b1630	0.159446	0.527981			15751	b1630	0.382385	1.38775		15751	b1630	0.286492	1.10381		15751	b1630	0.427378	1.61276			15751	b1630	0.423899	1.68353		15751	b1630	0.341817	1.34861		15751	b1630	0.367527	1.54394
15753	b1632	0.360049	1.6831		15753	b1632	0.266755	1.16621		15753	b1632	0.200929	0.916801			15753	b1632	0.278034	1.25633		15753	b1632	0.34286	1.4433		15753	b1632	0.259177	1.19224			15753	b1632	0.376088	1.6296		15753	b1632	0.272078	1.17817		15753	b1632	0.289724	1.2827
15754	b1633	0.300685	0.848272		15754	b1633	0.109784	0.349262		15754	b1633	0.242027	0.952933			15754	b1633	0.193868	0.524387		15754	b1633	0.339351	1.06742		15754	b1633	0.191007	0.559616			15754	b1633	0.013528	0.0504626		15754	b1633	0.472271	1.44094		15754	b1633	0.47983	1.54467
15755	b1634	-0.24581	-0.72618		15755	b1634	-0.238843	-0.65228		15755	b1634	-0.283048	-0.80908			15755	b1634	-0.316414	-0.99065		15755	b1634	-0.088033	-0.280152		15755	b1634	-0.176456	-0.499095			15755	b1634	-0.169639	-0.451097		15755	b1634	-0.335386	-1.1791		15755	b1634	-0.303463	-0.778363
15756	b1635	0.328652	1.12934		15756	b1635	0.517322	2.43895		15756	b1635	0.254177	1.21298			15756	b1635	0.0320514	0.143768		15756	b1635	0.24939	1.01387		15756	b1635	0.227941	1.00887			15756	b1635	0.0385951	0.173873		15756	b1635	0.39869	1.74566		15756	b1635	0.364939	1.36543
15757	b1636	-0.119743	-0.414634		15757	b1636	-0.147454	-0.526631		15757	b1636	-0.224946	-0.651377			15757	b1636	-0.307897	-1.22744		15757	b1636	-0.158082	-0.39255		15757	b1636	-0.129195	-0.432336			15757	b1636	0.0309821	0.0972455		15757	b1636	-0.352798	-1.37196		15757	b1636	-0.11655	-0.332258
15760	b1639	-0.24763	-0.790958		15760	b1639	-0.175241	-0.533725		15760	b1639	-0.303507	-0.976175			15760	b1639	-0.458369	-1.72466		15760	b1639	-0.362307	-0.932941		15760	b1639	-0.168756	-0.50896			15760	b1639	-0.209059	-0.714879		15760	b1639	-0.393685	-0.883656		15760	b1639	-0.181953	-0.477567
15761	b1640	0.185024	0.583563		15761	b1640	0.192472	0.635959		15761	b1640	0.242205	0.666704			15761	b1640	-0.0212557	-0.0693378		15761	b1640	0.0999447	0.20867		15761	b1640	0.259115	0.766384			15761	b1640	0.0927442	0.338161		15761	b1640	0.380336	1.58131		15761	b1640	0.244149	0.819831
15764	b1643	-0.471136	-1.26214		15764	b1643	-0.308241	-0.912218		15764	b1643	-0.295227	-0.899103			15764	b1643	-0.548414	-1.89932		15764	b1643	-0.582238	-2.25005		15764	b1643	-0.270554	-0.876754			15764	b1643	-0.29137	-0.694662		15764	b1643	-0.41316	-1.40592		15764	b1643	-0.320126	-1.21914
15765	b1644	-0.116221	-0.44624		15765	b1644	-0.113915	-0.444949		15765	b1644	-0.268167	-1.14296			15765	b1644	-0.291431	-1.19918		15765	b1644	-0.40112	-1.59335		15765	b1644	-0.00302976	-0.0118961			15765	b1644	-0.550459	-1.59638		15765	b1644	-0.0865599	-0.341984		15765	b1644	-0.192122	-0.677435
15766	b1645	-0.106425	-0.663873		15766	b1645	-0.154784	-0.925971		15766	b1645	-0.213409	-1.34702			15766	b1645	-0.254931	-1.31046		15766	b1645	-0.112858	-0.631328		15766	b1645	-0.103302	-0.64231			15766	b1645	-0.23747	-1.57156		15766	b1645	-0.12732	-0.760458		15766	b1645	-0.140834	-0.833359
15771	b1650	-0.284284	-1.16757		15771	b1650	-0.373996	-1.6778		15771	b1650	-0.197369	-0.947642			15771	b1650	-0.313367	-1.1733		15771	b1650	-0.345406	-1.44497		15771	b1650	-0.214923	-0.933376			15771	b1650	-0.352535	-1.35414		15771	b1650	-0.151275	-0.729545		15771	b1650	-0.199655	-0.81309
15774	b1653	0.0650493	0.350458		15774	b1653	0.216149	1.26537		15774	b1653	0.158761	0.904103			15774	b1653	0.107064	0.585376		15774	b1653	0.23096	1.30865		15774	b1653	0.208524	1.18244			15774	b1653	0.135241	0.696305		15774	b1653	0.169476	0.959069		15774	b1653	0.170276	0.979431
15777	b1656	0.277716	0.826071		15777	b1656	0.27913	0.643419		15777	b1656	0.13842	0.322418			15777	b1656	0.106306	0.321626		15777	b1656	0.450468	1.06929		15777	b1656	0.114493	0.320457			15777	b1656	-0.233309	-0.618377		15777	b1656	-0.012717	-0.028434		15777	b1656	0.291483	0.709637
15778	b1657	-0.0184727	-0.0791397		15778	b1657	-0.0706655	-0.283144		15778	b1657	-0.0574251	-0.260847			15778	b1657	-0.0610228	-0.264814		15778	b1657	0.155059	0.742153		15778	b1657	0.135478	0.572697			15778	b1657	-0.010364	-0.0394287		15778	b1657	0.101467	0.529418		15778	b1657	0.102471	0.429978
15779	b1658	-0.559423	-2.46268		15779	b1658	-0.533199	-1.99828		15779	b1658	-0.685324	-2.81963			15779	b1658	-0.883126	-3.30885		15779	b1658	-0.774361	-2.63521		15779	b1658	-0.586244	-2.37081			15779	b1658	-0.70462	-2.64892		15779	b1658	-0.612439	-2.34947		15779	b1658	-0.545381	-2.21119
15780	b1659	0.0299043	0.0571292		15780	b1659	0.0332616	0.0586457		15780	b1659	-0.247716	-0.461001			15780	b1659	-0.245805	-0.585482		15780	b1659	-0.0828272	-0.17171		15780	b1659	0.00218271	0.00388474			15780	b1659	-0.221227	-0.342082		15780	b1659	-0.147471	-0.27718		15780	b1659	-0.0384333	-0.0582271
15782	b1661	0.190983	1.13598		15782	b1661	0.255333	1.40305		15782	b1661	0.0544367	0.230018			15782	b1661	0.221998	1.23174		15782	b1661	0.362958	2.15554		15782	b1661	0.0981611	0.366681			15782	b1661	0.283606	1.6431		15782	b1661	0.130428	0.681075		15782	b1661	0.219285	1.05243
15785	b1664	-0.573823	-2.89425		15785	b1664	-0.411127	-1.9775		15785	b1664	-0.472181	-1.96986			15785	b1664	-0.543633	-2.54115		15785	b1664	-0.318697	-1.41458		15785	b1664	-0.384058	-1.95999			15785	b1664	-0.456901	-2.02978		15785	b1664	-0.384678	-1.6083		15785	b1664	-0.464666	-2.10948
15786	b1667	0.408315	0.927124		15786	b1667	-0.22723	-0.502383		15786	b1667	-0.0563098	-0.125368			15786	b1667	-0.17367	-0.389541		15786	b1667	0.222084	0.50521		15786	b1667	0.272611	0.619873			15786	b1667	0.456675	0.997448		15786	b1667	0.243378	0.57574		15786	b1667	0.370229	0.840316
15787	b1668	0.00593811	0.0259416		15787	b1668	0.00257739	0.0107055		15787	b1668	0.0355343	0.148752			15787	b1668	0.0748447	0.365651		15787	b1668	-0.0571145	-0.20383		15787	b1668	0.0460025	0.179248			15787	b1668	-0.101306	-0.46007		15787	b1668	-0.00329796	-0.012744		15787	b1668	0.128186	0.472753
15788	b1669	-0.296374	-0.710088		15788	b1669	-0.382853	-0.800516		15788	b1669	-0.375611	-1.01403			15788	b1669	-0.437927	-0.990527		15788	b1669	-0.420978	-1.14669		15788	b1669	-0.427955	-0.888289			15788	b1669	-0.731385	-1.38377		15788	b1669	-0.462427	-1.136		15788	b1669	-0.606891	-0.988569
15789	b1670	0.0679296	0.173359		15789	b1670	-0.102645	-0.275332		15789	b1670	-0.33665	-1.01024			15789	b1670	-0.278117	-1.01815		15789	b1670	0.168467	0.543339		15789	b1670	-0.0576815	-0.157122			15789	b1670	0.109332	0.383203		15789	b1670	-0.307039	-0.807903		15789	b1670	-0.0769287	-0.19071
15790	b1671	-0.127173	-0.1824		15790	b1671	0.0721421	0.118339		15790	b1671	-0.493596	-0.709055			15790	b1671	-0.250598	-0.432574		15790	b1671	-0.20207	-0.273872		15790	b1671	-0.105162	-0.176474			15790	b1671	-0.14798	-0.288037		15790	b1671	-0.220632	-0.332516		15790	b1671	-0.104884	-0.168693
15791	b1672	0.23843	1.09306		15791	b1672	0.0652428	0.3024		15791	b1672	0.0503541	0.237645			15791	b1672	-0.114448	-0.519841		15791	b1672	-0.0862149	-0.383751		15791	b1672	0.07014	0.337136			15791	b1672	-0.187195	-0.754014		15791	b1672	0.158035	0.719792		15791	b1672	0.135141	0.644017
15792	b1673	0.37641	1.03819		15792	b1673	0.322901	0.676437		15792	b1673	0.187275	0.61527			15792	b1673	0.281113	0.797899		15792	b1673	0.303021	0.851883		15792	b1673	0.256634	0.698658			15792	b1673	0.306498	0.832549		15792	b1673	0.19801	0.505313		15792	b1673	0.12398	0.323426
15793	b1674	-0.0238569	-0.0959885		15793	b1674	0.0249154	0.112501		15793	b1674	-0.135042	-0.530375			15793	b1674	0.0232702	0.112727		15793	b1674	-0.0834662	-0.309544		15793	b1674	0.078996	0.315851			15793	b1674	0.15089	0.565149		15793	b1674	0.0662211	0.277004		15793	b1674	0.183829	0.776988
15794	b1675	0.257205	0.438975		15794	b1675	0.32955	0.870095		15794	b1675	0.313632	0.611441			15794	b1675	0.0847479	0.192448		15794	b1675	0.324382	0.766907		15794	b1675	0.36027	0.672162			15794	b1675	0.0871534	0.237315		15794	b1675	0.272626	0.686002		15794	b1675	0.209482	0.408813
15795	b1676	-0.865762	-3.20248		15795	b1676	-0.582384	-2.17689		15795	b1676	-0.875682	-3.29624			15795	b1676	-0.784589	-2.65427		15795	b1676	-0.743686	-2.62558		15795	b1676	-0.68523	-2.69199			15795	b1676	-0.988811	-3.56427		15795	b1676	-0.505038	-1.96727		15795	b1676	-0.936273	-3.51444
15797	b1678	-0.412249	-2.03513		15797	b1678	-0.331027	-1.67705		15797	b1678	-0.421718	-2.33407			15797	b1678	-0.403099	-1.95281		15797	b1678	-0.515914	-2.75535		15797	b1678	-0.360582	-1.87862			15797	b1678	-0.349598	-1.75725		15797	b1678	-0.267614	-1.41226		15797	b1678	-0.327234	-1.94814
15798	b1679	-0.054477	-0.169122		15798	b1679	-0.0686163	-0.2199		15798	b1679	0.0830329	0.280871			15798	b1679	0.0849813	0.298557		15798	b1679	-0.048625	-0.129008		15798	b1679	-0.0289624	-0.103968			15798	b1679	0.112718	0.285192		15798	b1679	-0.0342306	-0.0953915		15798	b1679	-0.269477	-0.746475
15799	b1680	-0.108111	-0.436244		15799	b1680	-0.141057	-0.604205		15799	b1680	-0.100386	-0.412087			15799	b1680	-0.201356	-0.901809		15799	b1680	-0.12043	-0.44638		15799	b1680	-0.0400084	-0.161291			15799	b1680	-0.187422	-0.788015		15799	b1680	-0.148199	-0.649415		15799	b1680	-0.228938	-0.931848
15800	b1681	-0.107572	-0.520534		15800	b1681	-0.199056	-1.02761		15800	b1681	-0.0222332	-0.131842			15800	b1681	-0.152006	-0.781135		15800	b1681	0.0397052	0.208076		15800	b1681	0.0053761	0.0300055			15800	b1681	-0.225674	-1.0891		15800	b1681	-0.0807317	-0.436926		15800	b1681	-0.0296483	-0.153734
15801	b1682	-0.148336	-0.793144		15801	b1682	-0.202656	-1.00879		15801	b1682	-0.228108	-1.08397			15801	b1682	-0.27012	-1.20416		15801	b1682	-0.0860392	-0.451974		15801	b1682	-0.0837969	-0.409314			15801	b1682	-0.544072	-2.50219		15801	b1682	-0.179282	-0.890823		15801	b1682	-0.0772806	-0.356064
15802	b1683	-0.0469537	-0.277812		15802	b1683	-0.142522	-0.964945		15802	b1683	-0.00849656	-0.0515507			15802	b1683	-0.0803551	-0.454076		15802	b1683	-0.0118309	-0.065152		15802	b1683	0.0420952	0.238518			15802	b1683	-0.14455	-0.807126		15802	b1683	-0.0260163	-0.171514		15802	b1683	-0.057736	-0.353571
15806	b1687	-0.313707	-1.53988		15806	b1687	-0.264675	-1.51285		15806	b1687	-0.451245	-2.36879			15806	b1687	-0.336594	-1.71699		15806	b1687	-0.277042	-1.50735		15806	b1687	-0.293444	-1.55716			15806	b1687	-0.32345	-1.64594		15806	b1687	-0.461335	-2.55505		15806	b1687	-0.419491	-2.11895
15807	b1688	0.0067144	0.033008		15807	b1688	-0.0639518	-0.297773		15807	b1688	-0.116432	-0.550479			15807	b1688	0.0248159	0.135552		15807	b1688	-0.240231	-1.18542		15807	b1688	-0.0112115	-0.0612551			15807	b1688	-0.267503	-1.32885		15807	b1688	-0.0538505	-0.238996		15807	b1688	0.0398775	0.200381
15812	b1693	-0.566199	-2.37965		15812	b1693	-0.663621	-2.72357		15812	b1693	-0.865378	-3.34763			15812	b1693	-0.500589	-1.80274		15812	b1693	-0.359952	-1.41297		15812	b1693	-0.584179	-2.32375			15812	b1693	-0.555157	-2.40962		15812	b1693	-0.6983	-2.86739		15812	b1693	-0.81372	-3.18274
15813	b1694	0.157752	0.50198		15813	b1694	0.116905	0.387591		15813	b1694	0.130719	0.465827			15813	b1694	0.268758	1.1129		15813	b1694	0.201956	0.668721		15813	b1694	0.21908	0.686301			15813	b1694	0.090082	0.254484		15813	b1694	0.192443	0.567927		15813	b1694	0.390793	1.30499
15814	b1695	-0.126816	-0.692977		15814	b1695	-0.122186	-0.748385		15814	b1695	-0.0408478	-0.255338			15814	b1695	-0.142367	-0.861109		15814	b1695	-0.162747	-0.754124		15814	b1695	-0.12176	-0.725324			15814	b1695	-0.16291	-0.750301		15814	b1695	-0.241961	-1.37167		15814	b1695	0.00447289	0.0254908
15816	b1697	0.138593	0.593795		15816	b1697	0.0507078	0.21781		15816	b1697	0.154788	0.646162			15816	b1697	0.110832	0.544875		15816	b1697	0.146649	0.634388		15816	b1697	0.180708	0.816874			15816	b1697	0.125435	0.479729		15816	b1697	0.115665	0.49869		15816	b1697	0.275824	1.24991
15817	b1698	0.314892	1.26949		15817	b1698	0.239259	0.884703		15817	b1698	0.0822462	0.31135			15817	b1698	0.104232	0.368569		15817	b1698	0.280911	1.06285		15817	b1698	0.180159	0.632085			15817	b1698	0.281527	1.07532		15817	b1698	0.220658	0.840989		15817	b1698	0.0846658	0.293981
15818	b1699	-0.39232	-1.36133		15818	b1699	-0.287775	-0.996883		15818	b1699	-0.228661	-0.660374			15818	b1699	-0.299175	-0.970977		15818	b1699	-0.0447513	-0.139793		15818	b1699	-0.156515	-0.561621			15818	b1699	-0.171563	-0.676851		15818	b1699	-0.120931	-0.4482		15818	b1699	-0.116885	-0.366858
15820	b1701	0.00174852	0.00794379		15820	b1701	-0.00861615	-0.033779		15820	b1701	-0.0584302	-0.256515			15820	b1701	-0.0783888	-0.331828		15820	b1701	-0.0671283	-0.276701		15820	b1701	-0.00384712	-0.0163832			15820	b1701	-0.0764083	-0.33305		15820	b1701	0.0407485	0.15956		15820	b1701	0.0757636	0.301824
15821	b1702	0.335851	2.20002		15821	b1702	0.505956	3.04174		15821	b1702	0.390596	2.43439			15821	b1702	0.165859	0.994075		15821	b1702	0.520405	3.24929		15821	b1702	0.229086	1.4449			15821	b1702	0.218016	1.2912		15821	b1702	0.23002	1.38069		15821	b1702	0.236209	1.36664
15822	b1703	-0.0814535	-0.389138		15822	b1703	0.168865	0.787495		15822	b1703	0.0786669	0.45905			15822	b1703	0.0602803	0.326882		15822	b1703	0.145866	0.769157		15822	b1703	0.0992449	0.618723			15822	b1703	-0.0271026	-0.118431		15822	b1703	0.151035	0.849064		15822	b1703	0.283746	1.39374
15823	b1704	0.134978	0.579365		15823	b1704	0.0593837	0.256625		15823	b1704	0.0903029	0.354702			15823	b1704	0.108203	0.464166		15823	b1704	0.130116	0.608082		15823	b1704	0.291035	1.2159			15823	b1704	0.251265	0.961799		15823	b1704	0.120802	0.532417		15823	b1704	0.213218	1.04214
15825	b1706	-0.139876	-0.573312		15825	b1706	-0.183308	-0.701459		15825	b1706	-0.0405398	-0.179791			15825	b1706	-0.0916219	-0.468197		15825	b1706	-0.0240091	-0.112298		15825	b1706	0.0689561	0.314114			15825	b1706	-0.114126	-0.53388		15825	b1706	-0.0293149	-0.140224		15825	b1706	-0.155227	-0.684435
15826	b1707	-0.162898	-0.609891		15826	b1707	-0.559482	-1.99356		15826	b1707	-0.355941	-1.04202			15826	b1707	-0.133087	-0.488493		15826	b1707	-0.634588	-2.14723		15826	b1707	-0.20661	-0.604349			15826	b1707	-0.372825	-1.23574		15826	b1707	-0.187044	-0.670018		15826	b1707	-0.233953	-0.717092
15827	b1708	0.89557	3.13955		15827	b1708	0.742152	2.20538		15827	b1708	0.803725	2.62653			15827	b1708	0.495751	1.73999		15827	b1708	0.686543	2.70832		15827	b1708	0.887509	2.95867			15827	b1708	0.574037	1.90975		15827	b1708	0.653634	2.32693		15827	b1708	0.745362	2.65001
15829	b1710	0.383678	0.716859		15829	b1710	0.433809	0.842167		15829	b1710	0.478989	1.34729			15829	b1710	0.534936	1.45674		15829	b1710	0.447567	0.867214		15829	b1710	0.64198	1.30625			15829	b1710	0.536156	1.10219		15829	b1710	0.413786	0.861347		15829	b1710	0.494014	1.21236
15830	b1711	-0.206323	-0.621283		15830	b1711	-0.219189	-0.571042		15830	b1711	-0.36077	-0.946076			15830	b1711	-0.2208	-0.566326		15830	b1711	-0.278859	-0.766561		15830	b1711	-0.0332403	-0.0899039			15830	b1711	-0.34825	-0.954421		15830	b1711	-0.329178	-0.857386		15830	b1711	-0.128257	-0.350671
15840	b1722	-0.0264736	-0.139674		15840	b1722	-0.0251996	-0.142953		15840	b1722	-0.262658	-1.31693			15840	b1722	-0.278231	-1.42001		15840	b1722	-0.196556	-1.0178		15840	b1722	-0.0591543	-0.309404			15840	b1722	-0.275992	-1.35848		15840	b1722	-0.130039	-0.604876		15840	b1722	-0.12055	-0.606598
15841	b1723	0.0420643	0.178556		15841	b1723	0.00851096	0.0344411		15841	b1723	-0.0107285	-0.0405672			15841	b1723	0.0701691	0.284281		15841	b1723	-0.0367695	-0.138295		15841	b1723	0.129028	0.514227			15841	b1723	-0.187487	-0.702555		15841	b1723	-0.0208099	-0.0877899		15841	b1723	0.113625	0.43965
15843	b1725	0.0132707	0.0464736		15843	b1725	0.236728	1.04111		15843	b1725	0.260089	1.15937			15843	b1725	0.13227	0.538772		15843	b1725	0.0381602	0.142964		15843	b1725	0.0762205	0.265325			15843	b1725	0.0646056	0.231742		15843	b1725	0.0870685	0.399149		15843	b1725	0.32136	1.35556
15845	b1727	-0.780934	-2.46621		15845	b1727	-0.684324	-2.02936		15845	b1727	-0.627245	-2.11235			15845	b1727	-0.879454	-3.13902		15845	b1727	-0.843052	-2.58125		15845	b1727	-0.645127	-1.88185			15845	b1727	-0.125531	-0.479494		15845	b1727	-0.73537	-2.03123		15845	b1727	-0.735636	-2.64617
15846	b1728	0.228469	0.782786		15846	b1728	0.255725	0.810896		15846	b1728	0.315685	1.09592			15846	b1728	0.14986	0.500088		15846	b1728	0.107855	0.291815		15846	b1728	0.283358	0.997607			15846	b1728	0.226042	0.623814		15846	b1728	0.0754916	0.226145		15846	b1728	0.458962	1.4816
15847	b1729	-0.476932	-1.29341		15847	b1729	-0.628736	-2.25512		15847	b1729	-0.577765	-1.87328			15847	b1729	-0.670784	-2.25864		15847	b1729	-0.537872	-1.56631		15847	b1729	-0.540095	-1.83522			15847	b1729	-0.685704	-2.50481		15847	b1729	-0.464346	-1.82922		15847	b1729	-0.620367	-2.54875
15849	b1731	0.434384	0.889148		15849	b1731	0.475878	1.11753		15849	b1731	0.499335	0.945878			15849	b1731	0.418914	1.02062		15849	b1731	0.723421	1.69631		15849	b1731	0.384964	0.821887			15849	b1731	0.337991	0.636915		15849	b1731	0.404279	0.734746		15849	b1731	0.411654	0.82142
15851	b1733	0.250561	0.600397		15851	b1733	0.271693	0.700219		15851	b1733	0.136891	0.353706			15851	b1733	0.224035	0.874971		15851	b1733	0.255306	0.917317		15851	b1733	0.08664	0.298444			15851	b1733	0.383101	1.31252		15851	b1733	0.187807	0.640133		15851	b1733	0.397188	1.53237
15852	b1734	-0.148454	-0.558574		15852	b1734	-0.105583	-0.421607		15852	b1734	-0.328256	-1.2372			15852	b1734	-0.192409	-0.729085		15852	b1734	-0.345533	-1.24414		15852	b1734	-0.27822	-0.982089			15852	b1734	-0.232801	-0.836364		15852	b1734	-0.368139	-1.41632		15852	b1734	-0.252999	-0.972467
15855	b1737	0.142255	0.585136		15855	b1737	0.0741039	0.34059		15855	b1737	0.0808794	0.326701			15855	b1737	-0.000774787	-0.00353343		15855	b1737	0.0559535	0.256346		15855	b1737	0.0466616	0.180842			15855	b1737	0.0329241	0.142712		15855	b1737	0.000175948	0.00080935		15855	b1737	0.0884579	0.383635
15856	b1738	0.239332	0.951969		15856	b1738	0.242863	1.03404		15856	b1738	0.155142	0.685283			15856	b1738	0.336695	1.58546		15856	b1738	0.250765	1.14728		15856	b1738	0.346314	1.50076			15856	b1738	0.0371978	0.20808		15856	b1738	0.191698	0.712529		15856	b1738	0.25696	1.08897
15857	b1739	-0.279462	-0.776746		15857	b1739	-0.262616	-0.831824		15857	b1739	-0.137298	-0.373431			15857	b1739	-0.303794	-0.966654		15857	b1739	-0.340491	-1.04048		15857	b1739	-0.492605	-1.44345			15857	b1739	-0.0597385	-0.186463		15857	b1739	-0.362022	-1.12001		15857	b1739	-0.275083	-0.915365
15859	b1741	0.446292	1.289		15859	b1741	0.389523	1.05685		15859	b1741	0.209452	0.550167			15859	b1741	0.282359	0.750589		15859	b1741	0.459646	1.128		15859	b1741	0.309677	0.99439			15859	b1741	0.503259	1.28645		15859	b1741	0.241154	0.70697		15859	b1741	0.350404	0.921738
15861	b1743	0.169972	0.882304		15861	b1743	0.473841	1.67172		15861	b1743	0.32009	0.948701			15861	b1743	0.205758	1.04984		15861	b1743	0.186909	0.838014		15861	b1743	0.196306	1.00036			15861	b1743	0.213055	0.978971		15861	b1743	0.159472	0.65291		15861	b1743	0.360509	1.21296
15862	b1744	-0.00701859	-0.0346737		15862	b1744	-0.0943025	-0.476005		15862	b1744	-0.0038778	-0.017803			15862	b1744	-0.0796958	-0.354828		15862	b1744	-0.202911	-0.963277		15862	b1744	-0.0474113	-0.262251			15862	b1744	-0.1081	-0.396867		15862	b1744	-0.20777	-0.916093		15862	b1744	-0.0652247	-0.31101
15863	b1745	-0.150168	-0.813043		15863	b1745	-0.172387	-0.967463		15863	b1745	-0.11315	-0.616906			15863	b1745	-0.140809	-0.83579		15863	b1745	-0.249704	-1.36533		15863	b1745	-0.147447	-0.710374			15863	b1745	-0.384443	-2.08247		15863	b1745	-0.155115	-0.827108		15863	b1745	-0.0746131	-0.369914
15864	b1746	0.0423675	0.167051		15864	b1746	-0.0566472	-0.241739		15864	b1746	-0.116973	-0.51612			15864	b1746	-0.115338	-0.504276		15864	b1746	-0.0799168	-0.37816		15864	b1746	-0.037721	-0.168899			15864	b1746	-0.0810788	-0.335816		15864	b1746	-0.00714031	-0.0323562		15864	b1746	-0.0551652	-0.229437
15865	b1747	-0.23452	-1.00793		15865	b1747	-0.0689219	-0.308419		15865	b1747	-0.157514	-0.654001			15865	b1747	-0.296474	-1.11189		15865	b1747	-0.0886224	-0.349415		15865	b1747	-0.206587	-0.871074			15865	b1747	-0.20566	-0.800316		15865	b1747	-0.138048	-0.585915		15865	b1747	-0.118325	-0.514656
15866	b1748	0.353315	2.02911		15866	b1748	0.132348	0.744478		15866	b1748	0.319403	1.68754			15866	b1748	0.309003	1.50052		15866	b1748	0.365488	1.86825		15866	b1748	0.360258	1.83339			15866	b1748	0.247138	1.09046		15866	b1748	0.277605	1.34921		15866	b1748	0.32033	1.8577
15867	b1749	-0.134166	-0.582341		15867	b1749	-0.0356349	-0.148693		15867	b1749	-0.118074	-0.386825			15867	b1749	0.148331	0.522931		15867	b1749	-0.19075	-0.713262		15867	b1749	0.0420729	0.169791			15867	b1749	0.0168897	0.0658986		15867	b1749	-0.0209541	-0.0909274		15867	b1749	0.00639666	0.0266689
15868	b1750	0.071888	0.401015		15868	b1750	-0.115191	-0.597338		15868	b1750	0.00526044	0.0272255			15868	b1750	-0.171272	-0.740892		15868	b1750	-0.0298534	-0.135809		15868	b1750	0.0174674	0.0808447			15868	b1750	-0.287316	-1.30352		15868	b1750	-0.031923	-0.136696		15868	b1750	-0.112675	-0.541534
15869	b1751	-0.208518	-0.679646		15869	b1751	-0.182916	-0.585631		15869	b1751	-0.172579	-0.608283			15869	b1751	-0.266468	-0.760676		15869	b1751	-0.255764	-0.966897		15869	b1751	-0.281993	-0.916458			15869	b1751	-0.368805	-1.13951		15869	b1751	-0.421485	-1.73988		15869	b1751	-0.234055	-0.759732
15870	b1752	0.441427	1.63404		15870	b1752	0.642304	2.61645		15870	b1752	0.496834	1.92412			15870	b1752	0.385227	1.40998		15870	b1752	0.479652	1.90211		15870	b1752	0.705344	2.53617			15870	b1752	0.327976	0.929685		15870	b1752	0.381562	1.56171		15870	b1752	0.516276	1.83183
15871	b1753	-0.344062	-0.54731		15871	b1753	-0.292222	-0.778083		15871	b1753	-0.61613	-1.34326			15871	b1753	-0.515877	-0.921005		15871	b1753	-0.723394	-1.90699		15871	b1753	-0.185936	-0.407773			15871	b1753	-0.832284	-1.08501		15871	b1753	-0.580008	-1.46449		15871	b1753	-0.224541	-0.393081
15873	b1755	-0.258147	-1.06046		15873	b1755	-0.145657	-0.547868		15873	b1755	-0.254147	-1.04282			15873	b1755	-0.323805	-1.20063		15873	b1755	-0.186412	-0.772947		15873	b1755	-0.119211	-0.457791			15873	b1755	-0.101094	-0.421864		15873	b1755	-0.276168	-1.22756		15873	b1755	-0.185551	-0.802613
15874	b1756	0.561469	2.10379		15874	b1756	0.398623	1.69143		15874	b1756	0.533113	2.37025			15874	b1756	0.464874	2.11928		15874	b1756	0.422575	1.71956		15874	b1756	0.538636	2.25237			15874	b1756	0.555536	2.62213		15874	b1756	0.424889	1.95802		15874	b1756	0.52839	2.23635
15875	b1757	-0.220336	-0.736153		15875	b1757	-0.198798	-0.646384		15875	b1757	-0.304538	-0.867184			15875	b1757	-0.416515	-1.57674		15875	b1757	-0.377828	-1.41326		15875	b1757	-0.040183	-0.126171			15875	b1757	-0.148038	-0.490767		15875	b1757	-0.332933	-1.01188		15875	b1757	-0.180429	-0.546785
15878	b1760	-0.597229	-2.17555		15878	b1760	-0.484034	-1.85774		15878	b1760	-0.617189	-2.64305			15878	b1760	-0.614121	-1.95356		15878	b1760	-0.571247	-1.98893		15878	b1760	-0.441638	-1.60828			15878	b1760	-0.481757	-1.81214		15878	b1760	-0.634913	-2.22458		15878	b1760	-0.392049	-1.75331
15879	b1761	-0.173967	-0.762454		15879	b1761	0.0611114	0.310856		15879	b1761	-0.0514219	-0.23982			15879	b1761	0.0453675	0.213035		15879	b1761	-0.050022	-0.204505		15879	b1761	0.0490535	0.205858			15879	b1761	0.144963	0.637772		15879	b1761	-0.0184918	-0.0898711		15879	b1761	-0.0238612	-0.10082
15881	b1763	-0.19202	-0.960548		15881	b1763	-0.136239	-0.677179		15881	b1763	-0.366575	-1.46362			15881	b1763	-0.71804	-1.84419		15881	b1763	-0.368919	-1.58466		15881	b1763	-0.39713	-1.95502			15881	b1763	-0.030626	-0.125893		15881	b1763	-0.382912	-1.39075		15881	b1763	-0.341566	-1.44468
15882	b1764	-0.349588	-0.965112		15882	b1764	-0.24927	-0.670832		15882	b1764	-0.187914	-0.499457			15882	b1764	-0.235159	-0.637908		15882	b1764	-0.013341	-0.0472889		15882	b1764	-0.135594	-0.355049			15882	b1764	0.0623138	0.168075		15882	b1764	-0.202485	-0.592593		15882	b1764	-0.190802	-0.501311
15884	b1766	0.116966	0.617009		15884	b1766	0.128911	0.631043		15884	b1766	0.0888453	0.416322			15884	b1766	0.0539893	0.270238		15884	b1766	0.108625	0.502932		15884	b1766	0.131377	0.583046			15884	b1766	0.0566182	0.259994		15884	b1766	0.0799104	0.369494		15884	b1766	0.184235	0.898663
15885	b1767	0.00402979	0.0159092		15885	b1767	-0.0456347	-0.188953		15885	b1767	0.0307947	0.144456			15885	b1767	0.137273	0.595441		15885	b1767	-0.0442154	-0.185719		15885	b1767	-0.0710695	-0.282626			15885	b1767	0.153294	0.613115		15885	b1767	-0.0470369	-0.202476		15885	b1767	0.114953	0.443984
15886	b1768	0.125853	0.745715		15886	b1768	-0.00611494	-0.0328926		15886	b1768	-0.05302	-0.319415			15886	b1768	-0.00945874	-0.0653946		15886	b1768	0.000465462	0.00294633		15886	b1768	0.0440888	0.287438			15886	b1768	-0.0177723	-0.121858		15886	b1768	-0.049572	-0.291715		15886	b1768	0.0450998	0.303563
15887	b1769	-0.0681611	-0.196876		15887	b1769	-0.0227736	-0.0711817		15887	b1769	-0.198435	-0.598629			15887	b1769	-0.217119	-0.777128		15887	b1769	-0.0417355	-0.116834		15887	b1769	-0.206799	-0.517618			15887	b1769	0.00270591	0.00863185		15887	b1769	-0.112065	-0.308365		15887	b1769	-0.0972024	-0.27204
15888	b1770	-0.417249	-2.40263		15888	b1770	-0.441191	-2.66313		15888	b1770	-0.466623	-2.44257			15888	b1770	-0.382536	-2.2987		15888	b1770	-0.504471	-2.82619		15888	b1770	-0.44784	-2.39057			15888	b1770	-0.327982	-1.95349		15888	b1770	-0.308731	-1.91529		15888	b1770	-0.343483	-1.91151
15889	b1771	-0.257956	-0.995395		15889	b1771	-0.226906	-1.04077		15889	b1771	-0.228258	-1.00661			15889	b1771	-0.406482	-1.75938		15889	b1771	-0.27042	-1.13962		15889	b1771	-0.254293	-1.23979			15889	b1771	-0.409744	-1.37475		15889	b1771	-0.210196	-0.967479		15889	b1771	-0.235384	-1.01979
15890	b1772	0.261129	0.652948		15890	b1772	0.274545	0.74567		15890	b1772	0.0103143	0.028359			15890	b1772	0.0241397	0.0618289		15890	b1772	0.25208	0.581271		15890	b1772	0.0727668	0.185969			15890	b1772	0.0921609	0.221715		15890	b1772	0.139244	0.380336		15890	b1772	0.124719	0.310792
15892	b1774	-0.344199	-1.70884		15892	b1774	-0.348423	-1.75969		15892	b1774	-0.344773	-1.55765			15892	b1774	-0.404793	-1.92145		15892	b1774	-0.351514	-1.54515		15892	b1774	-0.421622	-1.87863			15892	b1774	-0.323057	-1.37579		15892	b1774	-0.356954	-1.51509		15892	b1774	-0.395366	-1.72586
15893	b1775	0.172388	1.18146		15893	b1775	0.142593	0.900548		15893	b1775	0.162496	1.04155			15893	b1775	0.122639	0.828451		15893	b1775	0.137341	0.870408		15893	b1775	0.159287	1.00313			15893	b1775	0.0349511	0.216814		15893	b1775	0.128779	0.84285		15893	b1775	0.240184	1.45593
15894	b1776	0.244177	1.10272		15894	b1776	0.300443	1.22962		15894	b1776	0.187115	0.728644			15894	b1776	0.331446	1.27593		15894	b1776	0.118598	0.471952		15894	b1776	0.3563	1.48425			15894	b1776	0.330377	1.46916		15894	b1776	0.216436	0.893006		15894	b1776	0.181681	0.745129
15895	b1777	-0.0174568	-0.0403816		15895	b1777	-0.322851	-0.74004		15895	b1777	-0.0830541	-0.193101			15895	b1777	-0.159892	-0.375254		15895	b1777	-0.139623	-0.320731		15895	b1777	0.0110019	0.0258757			15895	b1777	-0.35184	-0.757162		15895	b1777	-0.106556	-0.257825		15895	b1777	-0.0575529	-0.133393
15898	b1780	-0.426724	-1.87309		15898	b1780	-0.443565	-2.11079		15898	b1780	-0.431869	-2.10738			15898	b1780	-0.437059	-2.46248		15898	b1780	-0.406862	-1.84711		15898	b1780	-0.332902	-1.52188			15898	b1780	-0.315491	-1.45181		15898	b1780	-0.29533	-1.51355		15898	b1780	-0.533038	-1.98459
15899	b1781	0.365925	1.20686		15899	b1781	0.339389	1.23619		15899	b1781	0.215959	0.764495			15899	b1781	0.177821	0.755534		15899	b1781	0.326787	1.26675		15899	b1781	0.339973	1.2713			15899	b1781	0.336486	1.25569		15899	b1781	0.347479	1.13282		15899	b1781	0.339973	1.3231
15900	b1782	0.0906571	0.320895		15900	b1782	-0.0605258	-0.197412		15900	b1782	-0.145766	-0.414984			15900	b1782	0.0654236	0.218538		15900	b1782	-0.118555	-0.451306		15900	b1782	0.0784868	0.291294			15900	b1782	0.215952	0.66283		15900	b1782	0.0841629	0.308148		15900	b1782	0.0159853	0.0589876
15901	b1783	0.338095	1.83491		15901	b1783	0.262194	1.6194		15901	b1783	0.256023	1.50711			15901	b1783	0.292692	1.94992		15901	b1783	0.220194	1.23639		15901	b1783	0.325245	2.05563			15901	b1783	0.35666	1.98016		15901	b1783	0.28723	1.75537		15901	b1783	0.405902	2.4277
15902	b1784	-0.0116966	-0.0465541		15902	b1784	-0.0891483	-0.4012		15902	b1784	-0.0292499	-0.112938			15902	b1784	-0.0840433	-0.355148		15902	b1784	-0.147955	-0.620914		15902	b1784	0.00562438	0.0241238			15902	b1784	-0.182222	-0.769897		15902	b1784	0.0337748	0.144944		15902	b1784	0.00447289	0.0195163
15904	b1786	0.0259648	0.181358		15904	b1786	-0.0151901	-0.104072		15904	b1786	0.0036817	0.025137			15904	b1786	0.00163636	0.0116184		15904	b1786	0.0163984	0.117464		15904	b1786	-0.0419845	-0.288987			15904	b1786	0.0119425	0.0819663		15904	b1786	-0.0197352	-0.135083		15904	b1786	0.13219	0.873839
15905	b1787	0.337295	1.45537		15905	b1787	0.47946	2.40345		15905	b1787	0.382484	1.93549			15905	b1787	0.311188	1.64267		15905	b1787	0.44124	2.36251		15905	b1787	0.267357	1.19165			15905	b1787	0.315132	1.27754		15905	b1787	0.376366	1.8008		15905	b1787	0.489919	2.36008
15907	b1789	-0.067976	-0.189865		15907	b1789	-0.00428193	-0.0134113		15907	b1789	-0.123573	-0.396004			15907	b1789	0.0367531	0.110527		15907	b1789	-0.204296	-0.580874		15907	b1789	-0.00194592	-0.0061626			15907	b1789	0.0895555	0.228291		15907	b1789	-0.0203961	-0.0665504		15907	b1789	-0.0778915	-0.261387
15908	b1790	-0.182989	-0.386071		15908	b1790	-0.357011	-0.597948		15908	b1790	-0.333509	-0.537384			15908	b1790	-0.231995	-0.526354		15908	b1790	-0.0704197	-0.141653		15908	b1790	-0.121195	-0.2551			15908	b1790	-0.0850659	-0.151667		15908	b1790	-0.0824415	-0.146648		15908	b1790	-0.312632	-0.60177
15909	b1791	0.244557	1.28752		15909	b1791	0.211093	1.05231		15909	b1791	0.242818	1.18148			15909	b1791	0.175623	0.783708		15909	b1791	0.385631	1.94096		15909	b1791	0.19973	0.864905			15909	b1791	0.323007	1.50239		15909	b1791	0.227896	1.20137		15909	b1791	0.297062	1.32295
15910	b1792	-0.149865	-0.410661		15910	b1792	-0.149355	-0.410985		15910	b1792	-0.220633	-0.719679			15910	b1792	-0.277767	-0.98161		15910	b1792	0.0315184	0.114604		15910	b1792	-0.14165	-0.535032			15910	b1792	-0.372527	-0.78031		15910	b1792	-0.25053	-0.645966		15910	b1792	-0.237267	-0.75494
15911	b1793	-0.234876	-0.478927		15911	b1793	-0.266946	-0.531945		15911	b1793	-0.482405	-0.905087			15911	b1793	-0.307969	-0.599652		15911	b1793	-0.487451	-0.867044		15911	b1793	-0.589359	-0.987953			15911	b1793	-0.300483	-0.729589		15911	b1793	0.0177106	0.0521137		15911	b1793	-0.305424	-0.779042
15912	b1794	-0.195552	-0.756006		15912	b1794	-0.189268	-0.75911		15912	b1794	-0.305079	-1.21726			15912	b1794	-0.186013	-0.698184		15912	b1794	-0.310609	-1.35687		15912	b1794	-0.122032	-0.512647			15912	b1794	-0.156145	-0.679475		15912	b1794	-0.146042	-0.638295		15912	b1794	-0.0652982	-0.279145
15913	b1795	0.169162	0.364175		15913	b1795	-0.0591253	-0.136438		15913	b1795	-0.109324	-0.258374			15913	b1795	0.0674793	0.143389		15913	b1795	0.0354244	0.0805365		15913	b1795	0.151246	0.356765			15913	b1795	-0.242515	-0.395115		15913	b1795	0.0860135	0.16089		15913	b1795	0.118487	0.284818
15914	b1796	-0.306185	-1.13993		15914	b1796	-0.383034	-1.57283		15914	b1796	-0.20681	-0.883832			15914	b1796	-0.338762	-1.40844		15914	b1796	-0.292316	-0.982679		15914	b1796	-0.159838	-0.647338			15914	b1796	-0.302503	-1.10241		15914	b1796	-0.126792	-0.535211		15914	b1796	-0.14685	-0.55244
15915	b1797	0.395199	1.97812		15915	b1797	0.367525	1.90114		15915	b1797	0.48729	2.77711			15915	b1797	0.318841	1.60249		15915	b1797	0.387915	1.96137		15915	b1797	0.440648	2.52612			15915	b1797	0.345212	1.92478		15915	b1797	0.287195	1.42006		15915	b1797	0.427624	2.41377
15916	b1798	-0.329934	-1.8145		15916	b1798	-0.44277	-2.27681		15916	b1798	-0.390168	-2.16135			15916	b1798	-0.332976	-1.7959		15916	b1798	-0.345931	-1.75786		15916	b1798	-0.321714	-1.81794			15916	b1798	-0.369821	-1.74068		15916	b1798	-0.388831	-2.1627		15916	b1798	-0.223452	-1.22576
15917	b1799	-1.00401	-2.65654		15917	b1799	-1.09252	-3.80616		15917	b1799	-1.02486	-3.12721			15917	b1799	-0.984544	-2.67956		15917	b1799	-0.789217	-1.78765		15917	b1799	-1.01807	-3.28032			15917	b1799	-1.18058	-3.38213		15917	b1799	-0.886874	-2.67518		15917	b1799	-0.810444	-2.33158
15918	b1800	-0.101799	-0.560031		15918	b1800	-0.00337494	-0.0170031		15918	b1800	0.0171474	0.0919134			15918	b1800	0.121026	0.583948		15918	b1800	0.152038	0.718295		15918	b1800	0.00542099	0.0274413			15918	b1800	0.100324	0.503814		15918	b1800	0.125706	0.65307		15918	b1800	0.0948657	0.496508
15919	b1801	-0.0507127	-0.269645		15919	b1801	-0.109331	-0.684605		15919	b1801	-0.181297	-0.971374			15919	b1801	-0.105855	-0.527201		15919	b1801	-0.212575	-1.14821		15919	b1801	-0.176901	-0.959504			15919	b1801	-0.0745036	-0.381823		15919	b1801	-0.17618	-1.08009		15919	b1801	-0.0689073	-0.390675
15920	b1802	0.154062	0.630287		15920	b1802	0.0247672	0.114344		15920	b1802	-0.0801702	-0.339561			15920	b1802	-0.0548187	-0.233536		15920	b1802	-0.124557	-0.568908		15920	b1802	0.0423342	0.188412			15920	b1802	-0.0249972	-0.0993798		15920	b1802	-0.139183	-0.463891		15920	b1802	-0.0124403	-0.0561452
15921	b1803	0.331023	1.35865		15921	b1803	0.522773	1.94519		15921	b1803	0.288375	1.28873			15921	b1803	0.0866471	0.367481		15921	b1803	0.249452	1.00241		15921	b1803	0.414424	1.71264			15921	b1803	-0.0471526	-0.155242		15921	b1803	0.415529	1.4905		15921	b1803	0.384064	1.71978
15922	b1804	-0.298404	-1.06707		15922	b1804	-0.214546	-0.869597		15922	b1804	-0.276992	-1.09858			15922	b1804	-0.455943	-1.4687		15922	b1804	-0.543774	-1.8894		15922	b1804	-0.160293	-0.713327			15922	b1804	-0.19339	-0.513353		15922	b1804	-0.163991	-0.627722		15922	b1804	-0.024631	-0.081879
15923	b1805	-0.190688	-1.0701		15923	b1805	-0.270211	-1.45578		15923	b1805	-0.301104	-1.60726			15923	b1805	-0.0921985	-0.521676		15923	b1805	-0.220665	-1.2239		15923	b1805	-0.134139	-0.750131			15923	b1805	-0.104574	-0.563426		15923	b1805	-0.191534	-1.06254		15923	b1805	-0.200242	-1.1363
15924	b1806	0.101455	0.475026		15924	b1806	0.192485	0.896411		15924	b1806	0.15965	0.756431			15924	b1806	0.0571892	0.253546		15924	b1806	0.315101	1.4418		15924	b1806	0.0880135	0.36549			15924	b1806	0.0619595	0.239339		15924	b1806	0.197625	0.906678		15924	b1806	0.317534	1.5207
15926	b1808	0.323511	1.49673		15926	b1808	0.30102	1.29143		15926	b1808	0.318875	1.49302			15926	b1808	0.152273	0.685096		15926	b1808	0.246075	1.19288		15926	b1808	0.309988	1.51225			15926	b1808	0.32402	1.48874		15926	b1808	0.398318	1.93862		15926	b1808	0.259739	1.22256
15927	b1809	0.0101404	0.0565058		15927	b1809	-0.0845595	-0.454248		15927	b1809	-0.130847	-0.708906			15927	b1809	-0.157124	-0.736945		15927	b1809	-0.305028	-1.6193		15927	b1809	-0.105359	-0.606978			15927	b1809	-0.113064	-0.628006		15927	b1809	-0.0483518	-0.260175		15927	b1809	-0.0143317	-0.0702684
15928	b1810	-0.052402	-0.239725		15928	b1810	-0.100783	-0.479944		15928	b1810	-0.173064	-0.800666			15928	b1810	-0.357173	-1.87121		15928	b1810	-0.321745	-1.6594		15928	b1810	-0.189522	-0.961624			15928	b1810	-0.345992	-1.62855		15928	b1810	-0.181756	-0.837022		15928	b1810	-0.210453	-0.942639
15929	b1811	0.105174	0.306313		15929	b1811	0.121883	0.31234		15929	b1811	0.272491	0.67121			15929	b1811	0.231884	0.385651		15929	b1811	0.295315	0.785181		15929	b1811	0.460402	1.29003			15929	b1811	-0.3066	-0.665082		15929	b1811	0.228459	0.559583		15929	b1811	0.330415	0.751354
15930	b1812	0.290964	1.17392		15930	b1812	0.40227	1.93968		15930	b1812	0.331598	1.34856			15930	b1812	0.190708	0.905133		15930	b1812	0.253606	1.04385		15930	b1812	0.561189	2.65186			15930	b1812	0.491154	1.75472		15930	b1812	0.408629	1.84201		15930	b1812	0.509191	2.31457
15931	b1813	0.0115034	0.0650275		15931	b1813	0.0583925	0.332348		15931	b1813	0.0415477	0.214418			15931	b1813	-0.178166	-0.950948		15931	b1813	0.0520052	0.25726		15931	b1813	0.010565	0.0626606			15931	b1813	0.0094598	0.0461828		15931	b1813	-0.0430633	-0.252859		15931	b1813	0.00300119	0.0155101
15932	b1814	-0.094497	-0.304503		15932	b1814	-0.440127	-1.18201		15932	b1814	-0.334967	-0.961676			15932	b1814	-0.27824	-0.93155		15932	b1814	-0.0352273	-0.108048		15932	b1814	-0.377688	-1.11719			15932	b1814	-0.252665	-0.775678		15932	b1814	-0.154688	-0.478635		15932	b1814	-0.271124	-0.798908
15933	b1815	0.192715	0.903614		15933	b1815	0.262942	1.25668		15933	b1815	0.204599	0.903361			15933	b1815	0.208562	0.951052		15933	b1815	0.168703	0.629032		15933	b1815	0.376523	1.58546			15933	b1815	0.267812	1.11912		15933	b1815	0.326577	1.39149		15933	b1815	0.356021	1.52297
15934	b1816	0.270788	1.23028		15934	b1816	0.189845	0.746732		15934	b1816	0.197454	0.839546			15934	b1816	0.203675	0.940804		15934	b1816	0.136109	0.547465		15934	b1816	0.294025	1.21077			15934	b1816	0.0665274	0.266085		15934	b1816	0.257802	1.09327		15934	b1816	0.26312	1.19262
15935	b1817	0.177487	0.918859		15935	b1817	0.351208	2.09488		15935	b1817	0.275856	1.48111			15935	b1817	0.207263	1.1604		15935	b1817	0.367273	2.01078		15935	b1817	0.345076	2.06526			15935	b1817	0.127169	0.752422		15935	b1817	0.184482	1.05324		15935	b1817	0.364465	1.75017
15937	b1819	0.0454624	0.235888		15937	b1819	-0.171031	-0.867854		15937	b1819	-0.0222332	-0.112876			15937	b1819	-0.170142	-0.853739		15937	b1819	-0.119676	-0.591003		15937	b1819	-0.108968	-0.575599			15937	b1819	-0.0610515	-0.312483		15937	b1819	-0.10762	-0.559764		15937	b1819	-0.191633	-0.993266
15938	b1820	-0.247514	-1.41557		15938	b1820	-0.21556	-1.23449		15938	b1820	-0.118508	-0.648893			15938	b1820	-0.10339	-0.602777		15938	b1820	-0.104575	-0.568021		15938	b1820	-0.149875	-0.878352			15938	b1820	-0.180527	-1.01929		15938	b1820	-0.0838909	-0.506159		15938	b1820	-0.0984393	-0.546388
15939	b1821	-0.24427	-0.680205		15939	b1821	-0.24666	-0.826941		15939	b1821	-0.498589	-1.28371			15939	b1821	-0.265727	-0.712629		15939	b1821	-0.536031	-1.39348		15939	b1821	-0.181667	-0.592814			15939	b1821	-0.488153	-1.42331		15939	b1821	-0.165947	-0.394676		15939	b1821	-0.222679	-0.70874
15940	b1822	-0.00149759	-0.00599951		15940	b1822	-0.0686086	-0.21827		15940	b1822	0.0640182	0.213624			15940	b1822	-0.160176	-0.50054		15940	b1822	-0.0368285	-0.135899		15940	b1822	-0.0169415	-0.0623664			15940	b1822	-0.0276453	-0.114012		15940	b1822	0.0852953	0.313766		15940	b1822	0.00804488	0.0283824
15942	b1824	0.192918	0.472839		15942	b1824	0.670045	2.02868		15942	b1824	0.39227	1.2714			15942	b1824	0.158675	0.501417		15942	b1824	0.135878	0.360826		15942	b1824	0.0516577	0.120941			15942	b1824	0.202552	0.372286		15942	b1824	0.560543	1.74289		15942	b1824	0.554163	1.87779
15945	b1827	-0.113417	-0.290204		15945	b1827	0.114352	0.323749		15945	b1827	-0.226849	-0.581463			15945	b1827	-0.276042	-0.75188		15945	b1827	-0.0397751	-0.115871		15945	b1827	-0.368973	-1.05596			15945	b1827	-0.365725	-1.00528		15945	b1827	-0.249664	-0.735015		15945	b1827	-0.219581	-0.634926
15946	b1828	0.374916	1.57855		15946	b1828	0.243823	1.01942		15946	b1828	0.297704	1.41711			15946	b1828	0.279959	1.15487		15946	b1828	0.276124	1.45825		15946	b1828	0.405859	1.65209			15946	b1828	0.279836	1.3238		15946	b1828	0.316813	1.40479		15946	b1828	0.339932	1.42077
15947	b1829	0.493779	2.61618		15947	b1829	0.463118	2.42774		15947	b1829	0.473351	2.11969			15947	b1829	0.41803	2.17625		15947	b1829	0.275545	1.30065		15947	b1829	0.387152	1.77946			15947	b1829	0.399959	1.8138		15947	b1829	0.417639	2.22816		15947	b1829	0.423713	2.26255
15948	b1830	-0.753549	-3.92337		15948	b1830	-0.821659	-3.84747		15948	b1830	-0.630084	-2.6588			15948	b1830	-0.657408	-3.21426		15948	b1830	-0.796203	-3.05204		15948	b1830	-0.890755	-4.9126			15948	b1830	-0.811596	-2.76826		15948	b1830	-0.592965	-2.71241		15948	b1830	-0.529199	-2.3438
15950	b1832	-0.476257	-2.21183		15950	b1832	-0.345302	-1.57787		15950	b1832	-0.491519	-2.46598			15950	b1832	-0.45706	-2.31057		15950	b1832	-0.428024	-2.062		15950	b1832	-0.473974	-1.98523			15950	b1832	-0.68019	-3.05713		15950	b1832	-0.558959	-2.84818		15950	b1832	-0.466724	-2.07387
15951	b1833	-0.0597328	-0.283869		15951	b1833	-0.107172	-0.54562		15951	b1833	0.0575692	0.286201			15951	b1833	-0.0839001	-0.465964		15951	b1833	-0.187685	-0.991666		15951	b1833	0.0325702	0.164519			15951	b1833	-0.198917	-1.07368		15951	b1833	-0.00385126	-0.0197263		15951	b1833	-0.222021	-1.25314
15952	b1834	0.164232	1.03904		15952	b1834	0.158367	0.937017		15952	b1834	0.0539865	0.344662			15952	b1834	0.0680068	0.417297		15952	b1834	0.149693	0.948735		15952	b1834	0.142351	0.899987			15952	b1834	0.114897	0.701058		15952	b1834	0.0565368	0.337063		15952	b1834	0.197909	1.21603
15953	b1835	-0.309446	-1.28107		15953	b1835	-0.29907	-1.34637		15953	b1835	-0.318211	-1.64328			15953	b1835	-0.203844	-1.04546		15953	b1835	-0.286513	-1.0391		15953	b1835	-0.150967	-0.645683			15953	b1835	-0.691507	-2.99246		15953	b1835	-0.0587125	-0.269601		15953	b1835	-0.241045	-1.28399
15954	b1836	0.685653	1.52903		15954	b1836	0.617563	1.70153		15954	b1836	0.425453	1.43375			15954	b1836	0.605824	1.86481		15954	b1836	0.66968	1.61197		15954	b1836	0.677619	1.69787			15954	b1836	0.626488	1.62189		15954	b1836	0.758594	1.70886		15954	b1836	0.676848	1.64397
15956	b1838	-0.295716	-0.931516		15956	b1838	-0.315242	-0.873766		15956	b1838	-0.498778	-1.35716			15956	b1838	-0.225742	-0.75915		15956	b1838	-0.395239	-1.34648		15956	b1838	-0.108387	-0.37838			15956	b1838	-0.312659	-0.772858		15956	b1838	-0.357211	-0.958843		15956	b1838	-0.255866	-0.867014
15958	b1840	0.250539	1.15348		15958	b1840	0.319912	1.43743		15958	b1840	0.147229	0.629122			15958	b1840	0.157657	0.8044		15958	b1840	0.174559	0.583534		15958	b1840	0.334814	1.47462			15958	b1840	0.318934	1.55529		15958	b1840	0.278374	1.1789		15958	b1840	0.30045	1.21601
15961	b1843	0.392127	1.1976		15961	b1843	0.364993	0.992013		15961	b1843	0.227721	0.682424			15961	b1843	0.323566	1.02004		15961	b1843	0.234683	0.66826		15961	b1843	0.304913	0.839345			15961	b1843	0.245279	0.738059		15961	b1843	0.362363	1.21498		15961	b1843	0.207148	0.711581
15962	b1844	-0.162864	-0.574592		15962	b1844	-0.199998	-0.564616		15962	b1844	-0.21814	-0.746172			15962	b1844	-0.245912	-0.805696		15962	b1844	-0.366117	-1.22159		15962	b1844	-0.189394	-0.68472			15962	b1844	-0.258573	-0.762942		15962	b1844	-0.249381	-0.832849		15962	b1844	-0.0980056	-0.346037
15963	b1845	-0.0736028	-0.429592		15963	b1845	-0.162441	-0.951215		15963	b1845	0.0109162	0.0660979			15963	b1845	-0.0696639	-0.416622		15963	b1845	-0.0988136	-0.555452		15963	b1845	0.0209175	0.123866			15963	b1845	-0.0969145	-0.577092		15963	b1845	-0.0603252	-0.368062		15963	b1845	0.0250892	0.159187
15964	b1846	-0.026555	-0.0995298		15964	b1846	-0.165437	-0.681218		15964	b1846	-0.245	-1.03553			15964	b1846	-0.277954	-1.12661		15964	b1846	-0.31639	-1.19096		15964	b1846	-0.248816	-0.983439			15964	b1846	0.0109751	0.0433875		15964	b1846	-0.0155609	-0.0664684		15964	b1846	-0.146595	-0.621898
15967	b1849	-0.0248813	-0.121983		15967	b1849	-0.0446429	-0.204571		15967	b1849	-0.0770445	-0.399375			15967	b1849	-0.0224907	-0.122175		15967	b1849	0.016862	0.0792707		15967	b1849	-0.0364297	-0.164036			15967	b1849	-0.131807	-0.472171		15967	b1849	-0.0219721	-0.0958179		15967	b1849	-0.0412272	-0.178207
15969	b1851	-0.0628891	-0.392886		15969	b1851	-0.0816009	-0.485904		15969	b1851	-0.178312	-1.19174			15969	b1851	-0.0535058	-0.3406		15969	b1851	-0.0126806	-0.079123		15969	b1851	-0.13306	-0.835067			15969	b1851	-0.123387	-0.72183		15969	b1851	-0.0983517	-0.615779		15969	b1851	-0.091236	-0.55731
15971	b1853	-0.200253	-0.654817		15971	b1853	0.0479455	0.148215		15971	b1853	-0.0766837	-0.184339			15971	b1853	-0.160713	-0.710417		15971	b1853	0.187869	0.404009		15971	b1853	0.249329	0.62822			15971	b1853	0.298723	0.537216		15971	b1853	-0.0475362	-0.135644		15971	b1853	0.14818	0.471623
15972	b1854	-0.0585149	-0.24869		15972	b1854	0.113018	0.477787		15972	b1854	0.196056	0.832319			15972	b1854	-0.120601	-0.550195		15972	b1854	0.11816	0.507685		15972	b1854	0.038824	0.150339			15972	b1854	0.0611322	0.291339		15972	b1854	-0.0556879	-0.245336		15972	b1854	-0.0681132	-0.273987
15973	b1855	-1.19859	-4.0015		15973	b1855	-1.0948	-2.91885		15973	b1855	-1.42455	-3.29487			15973	b1855	-0.846853	-2.58595		15973	b1855	-1.37808	-2.36693		15973	b1855	-1.49912	-3.42223			15973	b1855	-1.06289	-3.35388		15973	b1855	-0.899859	-2.75214		15973	b1855	-0.946671	-2.02834
15974	b1856	-1.00001	-4.63239		15974	b1856	-1.59852	-7.03067		15974	b1856	-1.72869	-6.79164			15974	b1856	-1.11867	-4.96889		15974	b1856	-1.83929	-8.68173		15974	b1856	-1.8975	-8.25041			15974	b1856	-1.41697	-5.85323		15974	b1856	-1.22836	-5.87339		15974	b1856	-0.962934	-4.17215
15975	b1857	-0.0630522	-0.210242		15975	b1857	-0.324105	-1.23025		15975	b1857	-0.200449	-0.727849			15975	b1857	-0.0443459	-0.163906		15975	b1857	-0.04173	-0.137326		15975	b1857	-0.361014	-1.02425			15975	b1857	-0.251705	-0.837293		15975	b1857	-0.22779	-0.798791		15975	b1857	-0.0152633	-0.0580349
15976	b1858	0.399846	1.74117		15976	b1858	0.17662	0.634924		15976	b1858	0.239229	0.898542			15976	b1858	0.369837	1.44268		15976	b1858	0.190154	0.692187		15976	b1858	0.391214	1.43026			15976	b1858	0.208178	0.924806		15976	b1858	0.368864	1.4405		15976	b1858	0.300338	1.14359
15977	b1859	0.0578191	0.272		15977	b1859	0.073548	0.308395		15977	b1859	0.115127	0.505006			15977	b1859	0.038473	0.177639		15977	b1859	0.0448849	0.189429		15977	b1859	0.217267	0.966504			15977	b1859	-0.0426455	-0.158367		15977	b1859	0.0654517	0.279533		15977	b1859	0.181481	0.840583
15980	b1862	-0.480181	-1.20916		15980	b1862	-0.464693	-1.19384		15980	b1862	-0.42935	-1.0543			15980	b1862	-0.3701	-1.0001		15980	b1862	-0.3271	-0.879535		15980	b1862	-0.491082	-1.1758			15980	b1862	-0.348178	-1.05092		15980	b1862	-0.238143	-0.730546		15980	b1862	-0.493842	-1.43107
15982	b1864	-0.200143	-0.705764		15982	b1864	-0.24121	-0.8302		15982	b1864	-0.339788	-1.25096			15982	b1864	-0.132834	-0.507932		15982	b1864	-0.410428	-1.53515		15982	b1864	-0.266206	-0.921991			15982	b1864	-0.301717	-1.1028		15982	b1864	-0.268913	-0.938981		15982	b1864	-0.26898	-0.939243
15985	b1867	0.273873	0.846726		15985	b1867	0.21327	0.720132		15985	b1867	0.261164	0.865156			15985	b1867	0.291342	0.907676		15985	b1867	0.218078	0.693766		15985	b1867	0.307608	0.951053			15985	b1867	0.169762	0.608561		15985	b1867	0.244014	0.830206		15985	b1867	0.19414	0.589136
15986	b1868	0.308011	0.544049		15986	b1868	0.182244	0.299364		15986	b1868	0.184018	0.279013			15986	b1868	0.119876	0.172474		15986	b1868	0.0645321	0.0842955		15986	b1868	0.0651176	0.0813084			15986	b1868	0.305086	0.377382		15986	b1868	0.201344	0.258403		15986	b1868	0.4183	0.518604
15987	b1869	0.196473	0.980535		15987	b1869	0.267891	1.31378		15987	b1869	0.179541	0.840866			15987	b1869	0.210817	1.08006		15987	b1869	0.258241	1.4121		15987	b1869	0.255864	1.19037			15987	b1869	0.0409683	0.178996		15987	b1869	0.227885	1.08984		15987	b1869	0.236325	1.09601
15990	b1872	-0.169118	-0.782796		15990	b1872	-0.107361	-0.550745		15990	b1872	-0.060286	-0.296141			15990	b1872	-0.0609394	-0.296851		15990	b1872	-0.162981	-0.789862		15990	b1872	-0.162389	-0.80174			15990	b1872	-0.102566	-0.478183		15990	b1872	-0.126537	-0.621144		15990	b1872	-0.0318286	-0.15063
15991	b1873	-0.0593526	-0.312448		15991	b1873	-0.202442	-1.01451		15991	b1873	-0.240981	-1.0963			15991	b1873	-0.170294	-0.94226		15991	b1873	-0.210478	-1.17791		15991	b1873	-0.177498	-0.915303			15991	b1873	-0.253389	-1.02394		15991	b1873	-0.220476	-1.17785		15991	b1873	-0.225969	-1.28163
15993	b1875	-0.0202545	-0.0926847		15993	b1875	-0.0894379	-0.390689		15993	b1875	-0.197007	-0.816846			15993	b1875	-0.232277	-0.925457		15993	b1875	-0.191046	-0.768617		15993	b1875	-0.0638592	-0.259188			15993	b1875	-0.271843	-1.05865		15993	b1875	-0.0762061	-0.33492		15993	b1875	-0.00770107	-0.0314595
15996	b1878	0.0473306	0.160542		15996	b1878	0.186337	0.670751		15996	b1878	-0.0201526	-0.0625942			15996	b1878	-0.0261612	-0.10738		15996	b1878	0.0379102	0.142092		15996	b1878	0.0378878	0.115298			15996	b1878	0.0594953	0.187953		15996	b1878	0.0748099	0.262103		15996	b1878	0.0830454	0.264793
15997	b1879	0.0269588	0.157128		15997	b1879	0.170585	0.975548		15997	b1879	0.0760262	0.427051			15997	b1879	0.121662	0.711232		15997	b1879	0.0926988	0.520893		15997	b1879	0.109266	0.648155			15997	b1879	0.0125249	0.0692073		15997	b1879	0.0800908	0.509302		15997	b1879	0.156062	0.932972
15998	b1880	0.414336	2.11886		15998	b1880	0.320117	1.67488		15998	b1880	0.324906	1.70287			15998	b1880	0.392742	2.11939		15998	b1880	0.366312	1.76769		15998	b1880	0.436789	2.20588			15998	b1880	0.290524	1.54732		15998	b1880	0.439045	2.34871		15998	b1880	0.517884	2.93774
15999	b1881	0.103154	0.51788		15999	b1881	0.140711	0.762438		15999	b1881	0.164471	0.974554			15999	b1881	0.0914373	0.52411		15999	b1881	0.169401	0.968824		15999	b1881	0.291745	1.74978			15999	b1881	0.140641	0.630065		15999	b1881	0.240434	1.23632		15999	b1881	0.264847	1.24083
16001	b1883	-0.0290472	-0.120165		16001	b1883	0.145929	0.72851		16001	b1883	0.0828908	0.345996			16001	b1883	0.124421	0.623009		16001	b1883	0.142484	0.70435		16001	b1883	0.116346	0.604479			16001	b1883	-0.0696969	-0.293847		16001	b1883	0.228437	1.17863		16001	b1883	0.107716	0.544139
16002	b1884	-0.111246	-0.497867		16002	b1884	-0.0361297	-0.1734		16002	b1884	-0.174279	-0.738315			16002	b1884	-0.129921	-0.511484		16002	b1884	-0.0451326	-0.168712		16002	b1884	-0.100401	-0.36555			16002	b1884	-0.0160594	-0.0584196		16002	b1884	-0.0097236	-0.0430416		16002	b1884	-0.0665736	-0.284457
16003	b1885	0.0573077	0.261742		16003	b1885	0.0931934	0.408724		16003	b1885	0.125105	0.58484			16003	b1885	0.18674	0.874851		16003	b1885	0.179534	0.823237		16003	b1885	0.119023	0.511617			16003	b1885	0.166936	0.781336		16003	b1885	0.0319813	0.144849		16003	b1885	0.226552	1.05733
16004	b1886	0.0987421	0.568247		16004	b1886	0.0590547	0.351655		16004	b1886	0.173447	1.01182			16004	b1886	0.151541	0.898026		16004	b1886	0.041771	0.233028		16004	b1886	0.203484	1.23848			16004	b1886	-0.022333	-0.117489		16004	b1886	0.106338	0.582314		16004	b1886	0.17745	0.983398
16005	b1887	-0.0832502	-0.487995		16005	b1887	0.0144745	0.0825256		16005	b1887	0.0640801	0.386784			16005	b1887	0.0111143	0.0731319		16005	b1887	-0.0699823	-0.426086		16005	b1887	0.0726725	0.437912			16005	b1887	-0.0279072	-0.16659		16005	b1887	-0.0015829	-0.00896097		16005	b1887	0.145614	0.865855
16006	b1888	0.384423	1.86642		16006	b1888	0.225213	1.18672		16006	b1888	0.422404	2.15813			16006	b1888	0.40404	2.26713		16006	b1888	0.244052	1.37073		16006	b1888	0.387696	1.99761			16006	b1888	0.348263	1.78827		16006	b1888	0.374644	1.91859		16006	b1888	0.397378	2.14265
16007	b1889	-0.26665	-1.36414		16007	b1889	-0.165212	-0.966444		16007	b1889	-0.335311	-1.74518			16007	b1889	-0.279394	-1.61504		16007	b1889	-0.377313	-2.12479		16007	b1889	-0.241926	-1.40485			16007	b1889	-0.307892	-1.76919		16007	b1889	-0.279137	-1.65844		16007	b1889	-0.260851	-1.48527
16008	b1890	-0.213987	-0.656295		16008	b1890	-0.368818	-1.02538		16008	b1890	-0.241654	-0.664702			16008	b1890	-0.414329	-1.05554		16008	b1890	-0.264134	-0.605182		16008	b1890	-0.372324	-0.896538			16008	b1890	-0.460298	-1.20678		16008	b1890	-0.291513	-0.600021		16008	b1890	-0.202569	-0.618494
16009	b1891	-0.137735	-0.570225		16009	b1891	0.024855	0.0926947		16009	b1891	-0.228635	-0.597706			16009	b1891	-0.0822051	-0.199888		16009	b1891	0.0628627	0.218641		16009	b1891	-0.146073	-0.427122			16009	b1891	-0.223061	-0.626553		16009	b1891	-0.0409604	-0.138206		16009	b1891	0.0296166	0.0798683
16010	b1892	-0.298163	-1.49104		16010	b1892	-0.474162	-2.07486		16010	b1892	-0.350959	-1.59496			16010	b1892	-0.338719	-1.70674		16010	b1892	-0.358974	-1.83134		16010	b1892	-0.294253	-1.44749			16010	b1892	-0.410508	-1.66632		16010	b1892	-0.427763	-2.23325		16010	b1892	-0.233792	-1.08027
16013	b1895	0.0771055	0.330742		16013	b1895	0.24708	1.17514		16013	b1895	0.0394205	0.147759			16013	b1895	0.0553584	0.262266		16013	b1895	0.0597921	0.295476		16013	b1895	0.209345	0.874491			16013	b1895	0.0156457	0.0696021		16013	b1895	-0.0384245	-0.17311		16013	b1895	0.111434	0.53385
16014	b1896	0.0232255	0.169747		16014	b1896	0.248379	1.8206		16014	b1896	0.27286	1.92981			16014	b1896	0.173663	1.15167		16014	b1896	0.119916	0.827834		16014	b1896	-0.335064	-2.56974			16014	b1896	-0.00544892	-0.0387314		16014	b1896	0.220073	1.63596		16014	b1896	-0.480521	-3.50321
16015	b1897	0.249639	1.06707		16015	b1897	0.559474	2.90974		16015	b1897	0.348306	1.40441			16015	b1897	0.297521	1.23352		16015	b1897	0.344599	1.34467		16015	b1897	-0.168258	-0.759714			16015	b1897	0.162595	0.605193		16015	b1897	0.193943	0.965026		16015	b1897	-0.519464	-2.10843
16017	b1900	-0.0408849	-0.143172		16017	b1900	-0.0266208	-0.0965551		16017	b1900	0.0145468	0.0554535			16017	b1900	-0.0417493	-0.164525		16017	b1900	-0.102659	-0.448447		16017	b1900	-0.0466889	-0.146837			16017	b1900	0.0444288	0.13565		16017	b1900	-0.0865102	-0.293883		16017	b1900	-0.078727	-0.284609
16018	b1901	0.424091	1.7026		16018	b1901	0.283573	0.967009		16018	b1901	0.18651	0.678318			16018	b1901	0.407153	1.32114		16018	b1901	0.261729	1.00654		16018	b1901	0.373851	1.36498			16018	b1901	0.082704	0.282408		16018	b1901	0.199863	0.746451		16018	b1901	0.369295	1.28686
16019	b1902	0.214667	0.691859		16019	b1902	0.156352	0.494561		16019	b1902	0.243553	0.765883			16019	b1902	-0.0110587	-0.0370367		16019	b1902	0.366266	1.27943		16019	b1902	0.168331	0.512994			16019	b1902	0.299745	0.947034		16019	b1902	0.338234	1.30518		16019	b1902	0.169249	0.498975
16021	b1904	-0.137851	-0.40086		16021	b1904	-0.18157	-0.489973		16021	b1904	-0.0358974	-0.131454			16021	b1904	-0.168208	-0.47419		16021	b1904	-0.103472	-0.249546		16021	b1904	-0.197762	-0.49507			16021	b1904	-0.0992844	-0.308416		16021	b1904	-0.184604	-0.471193		16021	b1904	-0.0619511	-0.163859
16022	b1905	0.0266736	0.129227		16022	b1905	0.15284	0.799647		16022	b1905	0.0894787	0.462434			16022	b1905	0.0456089	0.206796		16022	b1905	0.166244	0.829254		16022	b1905	0.108372	0.511159			16022	b1905	0.0193659	0.0921053		16022	b1905	0.112592	0.525764		16022	b1905	0.0603815	0.299573
16024	b1907	-0.204905	-0.569078		16024	b1907	-0.195676	-0.545295		16024	b1907	0.0436002	0.12732			16024	b1907	0.00243841	0.00605158		16024	b1907	0.0994201	0.276521		16024	b1907	-0.21148	-0.485379			16024	b1907	-0.123401	-0.38211		16024	b1907	-0.145616	-0.366999		16024	b1907	-0.124009	-0.282246
16025	b1908	-0.362264	-1.18591		16025	b1908	-0.332173	-0.910516		16025	b1908	-0.377059	-1.31617			16025	b1908	-0.233347	-0.834506		16025	b1908	-0.0578314	-0.211181		16025	b1908	-0.361269	-1.3497			16025	b1908	-0.390286	-1.32537		16025	b1908	-0.294433	-1.00845		16025	b1908	-0.170421	-0.834672
16027	b1913	0.217844	0.880926		16027	b1913	0.255441	1.03059		16027	b1913	0.226341	0.914605			16027	b1913	0.195079	0.801857		16027	b1913	0.15063	0.595435		16027	b1913	0.271099	1.14113			16027	b1913	0.229935	0.925469		16027	b1913	0.217276	0.862847		16027	b1913	0.190002	0.844067
16028	b1914	-0.221374	-0.896487		16028	b1914	-0.0271483	-0.120869		16028	b1914	-0.163171	-0.578277			16028	b1914	-0.0139649	-0.0655504		16028	b1914	-0.36792	-1.32605		16028	b1914	-0.217868	-0.987698			16028	b1914	-0.017997	-0.0784451		16028	b1914	-0.191731	-0.818602		16028	b1914	-0.0862117	-0.394224
16029	b1915	0.0652634	0.283106		16029	b1915	0.022829	0.0893917		16029	b1915	0.0466752	0.206079			16029	b1915	0.115002	0.499918		16029	b1915	0.229037	0.957986		16029	b1915	0.0766328	0.342547			16029	b1915	-0.0427247	-0.16264		16029	b1915	0.0330499	0.135265		16029	b1915	-0.036245	-0.154986
16030	b1916	0.130524	0.864575		16030	b1916	0.174147	1.17645		16030	b1916	0.330804	2.21913			16030	b1916	0.00318329	0.0218711		16030	b1916	-0.0513037	-0.331492		16030	b1916	0.0997765	0.65383			16030	b1916	-0.0697669	-0.436382		16030	b1916	0.161099	1.00577		16030	b1916	0.298962	2.01648
16031	b1917	-0.231746	-0.513254		16031	b1917	-0.358698	-0.841787		16031	b1917	-0.258403	-0.600869			16031	b1917	-0.122801	-0.321047		16031	b1917	-0.195119	-0.511096		16031	b1917	-0.508559	-1.30249			16031	b1917	-0.137312	-0.375846		16031	b1917	-0.34425	-1.06455		16031	b1917	-0.226096	-0.550601
16032	b1918	0.497445	1.07434		16032	b1918	0.461707	1.55073		16032	b1918	0.446631	1.22017			16032	b1918	0.368125	0.957304		16032	b1918	0.686002	2.06268		16032	b1918	0.569482	1.38002			16032	b1918	0.269951	0.60533		16032	b1918	0.578661	1.80954		16032	b1918	0.626523	2.13007
16033	b1919	0.42695	1.62444		16033	b1919	0.283524	0.967482		16033	b1919	0.213091	0.716994			16033	b1919	0.290367	0.835272		16033	b1919	0.244405	0.788393		16033	b1919	0.146239	0.488279			16033	b1919	0.142799	0.559132		16033	b1919	0.271829	0.820594		16033	b1919	0.227939	0.827798
16035	b1921	-0.220444	-0.693944		16035	b1921	-0.466649	-1.18117		16035	b1921	-0.44722	-1.21697			16035	b1921	-0.229849	-0.655353		16035	b1921	-0.479953	-1.08597		16035	b1921	-0.532192	-1.54267			16035	b1921	-0.400717	-0.960858		16035	b1921	-0.292859	-0.788953		16035	b1921	-0.532592	-1.05264
16036	b1922	-0.119729	-0.637295		16036	b1922	-0.245163	-1.44256		16036	b1922	-0.153994	-0.790143			16036	b1922	-0.1184	-0.603286		16036	b1922	-0.246254	-1.33297		16036	b1922	-0.161954	-0.88091			16036	b1922	-0.244329	-1.19543		16036	b1922	-0.205488	-1.21128		16036	b1922	-0.141009	-0.634396
16037	b1923	0.0850792	0.481721		16037	b1923	0.106247	0.603771		16037	b1923	0.0769659	0.454479			16037	b1923	0.0897038	0.520341		16037	b1923	0.00531811	0.0311611		16037	b1923	0.0264336	0.133219			16037	b1923	-0.0150739	-0.0714762		16037	b1923	0.0588913	0.337797		16037	b1923	0.16119	1.01933
16038	b1924	0.350609	1.18356		16038	b1924	0.341949	1.13107		16038	b1924	0.361658	1.09574			16038	b1924	0.329232	1.09979		16038	b1924	0.455866	1.52082		16038	b1924	0.282847	0.81075			16038	b1924	0.327169	1.01863		16038	b1924	0.408348	1.4336		16038	b1924	0.474095	1.39919
16039	b1925	0.245392	0.774619		16039	b1925	0.195804	0.650511		16039	b1925	0.107886	0.256865			16039	b1925	0.311921	0.984617		16039	b1925	0.177219	0.420882		16039	b1925	0.189032	0.594766			16039	b1925	0.126104	0.25968		16039	b1925	0.154925	0.491714		16039	b1925	0.222007	0.713201
16040	b1926	0.275256	0.41901		16040	b1926	0.166105	0.325633		16040	b1926	0.307414	0.440963			16040	b1926	0.20813	0.316407		16040	b1926	0.0196502	0.0279081		16040	b1926	0.464469	0.666584			16040	b1926	0.0392203	0.0545416		16040	b1926	0.339228	0.505944		16040	b1926	0.375443	0.641166
16041	b1927	0.0386864	0.174204		16041	b1927	-0.0858786	-0.367002		16041	b1927	-0.0259041	-0.118453			16041	b1927	-0.0122148	-0.0524867		16041	b1927	-0.0477803	-0.216765		16041	b1927	-0.0818794	-0.342476			16041	b1927	-0.100683	-0.418314		16041	b1927	-0.209023	-0.951057		16041	b1927	-0.150977	-0.704738
16042	b1928	0.253617	1.13212		16042	b1928	0.283981	1.23162		16042	b1928	0.2969	1.13298			16042	b1928	0.191587	0.831208		16042	b1928	0.180443	0.860285		16042	b1928	0.147795	0.598818			16042	b1928	-0.0281191	-0.12687		16042	b1928	0.325324	1.29961		16042	b1928	0.332332	1.27041
16043	b1929	-0.00473068	-0.0307964		16043	b1929	-0.125561	-0.840628		16043	b1929	-0.0312522	-0.207602			16043	b1929	-0.0936781	-0.58849		16043	b1929	-0.185205	-1.16999		16043	b1929	-0.0975675	-0.659493			16043	b1929	-0.124083	-0.707691		16043	b1929	-0.166187	-1.03302		16043	b1929	-0.11836	-0.682152
16044	b1930	0.184941	1.17323		16044	b1930	0.0573209	0.359688		16044	b1930	-0.0388945	-0.246598			16044	b1930	0.0978185	0.60979		16044	b1930	0.0936098	0.574318		16044	b1930	0.0939185	0.604493			16044	b1930	0.059281	0.333066		16044	b1930	0.00839393	0.0534281		16044	b1930	0.115817	0.738371
16046	b1932	0.248659	1.13168		16046	b1932	0.356122	1.48187		16046	b1932	0.472824	2.07664			16046	b1932	0.344296	1.62011		16046	b1932	0.299377	1.33552		16046	b1932	0.158531	0.68816			16046	b1932	0.229411	1.00038		16046	b1932	0.241419	1.01399		16046	b1932	0.270445	1.20583
16052	b1938	-0.0782339	-0.479859		16052	b1938	-0.237314	-1.24505		16052	b1938	-0.0964887	-0.549219			16052	b1938	-0.129812	-0.803785		16052	b1938	-0.203565	-1.07706		16052	b1938	-0.151923	-0.825218			16052	b1938	-0.256714	-1.4605		16052	b1938	-0.0766962	-0.46665		16052	b1938	-0.22709	-1.28341
16053	b1939	-0.0964987	-0.257473		16053	b1939	-0.0841908	-0.195521		16053	b1939	-0.25621	-0.457001			16053	b1939	-0.125446	-0.326112		16053	b1939	-0.229828	-0.517775		16053	b1939	-0.333673	-0.631275			16053	b1939	-0.747602	-1.72318		16053	b1939	-0.323548	-0.761532		16053	b1939	-0.204834	-0.392959
16054	b1940	-0.0949008	-0.463567		16054	b1940	-0.083163	-0.347388		16054	b1940	-0.076129	-0.469087			16054	b1940	-0.00103703	-0.00517927		16054	b1940	-0.262354	-1.31553		16054	b1940	-0.0856492	-0.442855			16054	b1940	-0.0793768	-0.483334		16054	b1940	-0.0855382	-0.464294		16054	b1940	-0.142426	-0.880351
16055	b1941	0.0752669	0.384888		16055	b1941	0.0605105	0.296137		16055	b1941	0.103244	0.584519			16055	b1941	0.0264537	0.123354		16055	b1941	-0.0544548	-0.297912		16055	b1941	0.0435906	0.214659			16055	b1941	0.032909	0.175224		16055	b1941	0.0903106	0.489853		16055	b1941	0.0980112	0.54944
16057	b1943	0.47345	2.08968		16057	b1943	0.326768	1.52439		16057	b1943	0.364439	1.69633			16057	b1943	0.41045	1.7719		16057	b1943	0.397581	1.69818		16057	b1943	0.38647	1.72545			16057	b1943	0.33125	1.24532		16057	b1943	0.397695	1.83944		16057	b1943	0.278294	1.19768
16058	b1944	-0.000897974	-0.0035948		16058	b1944	0.0154229	0.05306		16058	b1944	-0.0515907	-0.204815			16058	b1944	0.0990498	0.412669		16058	b1944	-0.239288	-0.802097		16058	b1944	-0.0990707	-0.426615			16058	b1944	-0.187729	-0.729078		16058	b1944	0.0106528	0.046667		16058	b1944	-0.0657743	-0.258595
16059	b1945	0.279411	1.55281		16059	b1945	0.237823	1.28431		16059	b1945	0.268663	1.29597			16059	b1945	0.268996	1.3777		16059	b1945	0.270528	1.34705		16059	b1945	0.239319	1.22613			16059	b1945	0.276135	1.31235		16059	b1945	0.314385	1.58038		16059	b1945	0.312351	1.54175
16060	b1946	-0.275576	-0.661619		16060	b1946	-0.111824	-0.470402		16060	b1946	-0.0871262	-0.345105			16060	b1946	-0.128979	-0.504434		16060	b1946	-0.232523	-0.885179		16060	b1946	-0.235402	-0.812648			16060	b1946	-0.0674113	-0.285013		16060	b1946	-0.154962	-0.578563		16060	b1946	-0.341558	-0.991705
16062	b1948	0.476767	1.68795		16062	b1948	0.267968	1.03115		16062	b1948	0.302933	1.11015			16062	b1948	0.310473	1.16086		16062	b1948	0.299363	0.986804		16062	b1948	0.217453	0.702516			16062	b1948	0.253691	0.832588		16062	b1948	0.323905	1.49367		16062	b1948	0.369848	1.68494
16063	b1949	-0.671369	-1.49782		16063	b1949	-0.227563	-0.575053		16063	b1949	-0.235611	-0.484994			16063	b1949	-0.565812	-0.977301		16063	b1949	-0.427815	-0.737633		16063	b1949	-0.327127	-0.582719			16063	b1949	-0.225667	-0.408469		16063	b1949	-0.362195	-0.651949		16063	b1949	-0.470774	-1.06522
16066	b1952	-0.0329638	-0.183441		16066	b1952	0.0919794	0.495145		16066	b1952	0.144961	0.759636			16066	b1952	-0.0850772	-0.471702		16066	b1952	-0.145667	-0.790396		16066	b1952	-0.0552121	-0.318224			16066	b1952	0.0499611	0.250341		16066	b1952	-0.00483054	-0.0276668		16066	b1952	-0.147694	-0.840571
16067	b1953	-0.129166	-0.238582		16067	b1953	-0.013279	-0.0215551		16067	b1953	0.0219857	0.0343618			16067	b1953	-0.287004	-0.433426		16067	b1953	0.0933935	0.147748		16067	b1953	-0.21412	-0.345263			16067	b1953	-0.334187	-0.677272		16067	b1953	-0.0085582	-0.0162691		16067	b1953	-0.229203	-0.311701
16068	b1955	0.0910281	0.293986		16068	b1955	0.055718	0.1852		16068	b1955	0.137476	0.384032			16068	b1955	0.189359	0.490546		16068	b1955	-0.115879	-0.351977		16068	b1955	-0.0877143	-0.211754			16068	b1955	-0.347885	-1.10364		16068	b1955	-0.135981	-0.385247		16068	b1955	-0.0333033	-0.0827189
16069	b1956	0.195882	1.00391		16069	b1956	0.257382	1.59811		16069	b1956	0.253865	1.29877			16069	b1956	0.223938	1.20937		16069	b1956	0.327989	1.87442		16069	b1956	0.225769	1.43307			16069	b1956	0.0939049	0.501247		16069	b1956	0.342519	1.97364		16069	b1956	0.376945	2.19694
16071	b1958	0.174732	0.653837		16071	b1958	-0.134774	-0.475637		16071	b1958	0.126351	0.47995			16071	b1958	0.208623	0.863511		16071	b1958	-0.0140013	-0.0489462		16071	b1958	0.0948705	0.345595			16071	b1958	0.0797583	0.252055		16071	b1958	0.113194	0.4368		16071	b1958	0.107217	0.379663
16072	b1959	-0.124138	-0.418581		16072	b1959	-0.0336801	-0.136753		16072	b1959	-0.118967	-0.382166			16072	b1959	-0.0723384	-0.307711		16072	b1959	0.13348	0.46844		16072	b1959	-4.38105e-05	-0.000155671			16072	b1959	-0.151815	-0.573176		16072	b1959	-0.15022	-0.535644		16072	b1959	-0.125326	-0.504617
16073	b1960	0.593903	1.15317		16073	b1960	0.644348	1.16103		16073	b1960	0.775913	1.68374			16073	b1960	0.628958	1.61049		16073	b1960	0.642923	1.42478		16073	b1960	0.717305	1.54959			16073	b1960	0.597805	1.17922		16073	b1960	0.70132	1.34177		16073	b1960	0.568178	1.24649
16075	b1962	0.426681	1.68302		16075	b1962	0.537795	2.06301		16075	b1962	0.536617	1.85469			16075	b1962	0.420211	1.50274		16075	b1962	0.420656	1.49875		16075	b1962	0.519164	1.88536			16075	b1962	0.420097	1.77691		16075	b1962	0.459139	1.80488		16075	b1962	0.519487	2.05627
16076	b1963	-0.188621	-0.651896		16076	b1963	-0.0475685	-0.146106		16076	b1963	-0.0661753	-0.220254			16076	b1963	-0.357994	-0.866937		16076	b1963	-0.32595	-0.865715		16076	b1963	-0.103419	-0.346266			16076	b1963	-0.141572	-0.34895		16076	b1963	-0.11026	-0.360361		16076	b1963	-0.246384	-0.811361
16080	b1967	0.211842	1.17086		16080	b1967	0.163726	0.857368		16080	b1967	0.149483	0.794528			16080	b1967	0.211575	1.13891		16080	b1967	0.0811463	0.408764		16080	b1967	0.136276	0.751463			16080	b1967	0.116901	0.541797		16080	b1967	0.105728	0.582935		16080	b1967	0.159287	0.844461
16082	b1969	-0.612974	-2.22752		16082	b1969	-0.510442	-1.60018		16082	b1969	-0.640328	-2.46354			16082	b1969	-0.4447	-1.66225		16082	b1969	-0.72307	-2.58084		16082	b1969	-0.558332	-2.07871			16082	b1969	-0.41747	-1.48074		16082	b1969	-0.622541	-2.10141		16082	b1969	-0.605026	-2.20558
16084	b1971	-0.181232	-0.652509		16084	b1971	-0.283807	-1.00246		16084	b1971	-0.563173	-1.8643			16084	b1971	-0.253957	-0.941567		16084	b1971	-0.409136	-1.54772		16084	b1971	-0.206445	-0.809512			16084	b1971	-0.174312	-0.567235		16084	b1971	-0.468554	-1.70221		16084	b1971	-0.358827	-1.5153
16085	b1972	0.225827	1.07522		16085	b1972	0.278615	1.44707		16085	b1972	0.182261	0.966855			16085	b1972	0.195582	1.17354		16085	b1972	0.229136	1.29767		16085	b1972	0.0822151	0.429534			16085	b1972	0.190389	1.04025		16085	b1972	0.18374	0.95572		16085	b1972	0.125086	0.670988
16086	b1973	-0.421451	-1.39686		16086	b1973	-0.156567	-0.497067		16086	b1973	-0.410459	-1.14632			16086	b1973	-0.282327	-1.06283		16086	b1973	-0.172865	-0.535984		16086	b1973	-0.376523	-1.08669			16086	b1973	0.234773	0.693104		16086	b1973	-0.423308	-1.41005		16086	b1973	-0.427032	-1.40944
16087	b1974	0.0170512	0.102899		16087	b1974	0.112522	0.651025		16087	b1974	0.0485411	0.257863			16087	b1974	0.0373514	0.217339		16087	b1974	0.00353185	0.0209581		16087	b1974	0.0543424	0.282054			16087	b1974	-0.0518782	-0.273613		16087	b1974	-0.0364895	-0.209289		16087	b1974	0.00554153	0.0310993
16088	b1976	0.125327	0.33922		16088	b1976	0.272303	0.536369		16088	b1976	0.407316	1.03121			16088	b1976	-0.092625	-0.217412		16088	b1976	0.23046	0.515034		16088	b1976	0.339556	0.846661			16088	b1976	0.406692	0.852032		16088	b1976	0.176889	0.446544		16088	b1976	0.249689	0.686055
16089	b1978	0.0359029	0.30155		16089	b1978	-0.0248145	-0.204524		16089	b1978	-0.0388098	-0.312429			16089	b1978	-0.0172868	-0.141302		16089	b1978	-0.013439	-0.110763		16089	b1978	-0.0678931	-0.549209			16089	b1978	-0.0422847	-0.342827		16089	b1978	-0.0671877	-0.55312		16089	b1978	-0.0514137	-0.422838
16092	b1981	-0.131727	-0.468508		16092	b1981	-0.271164	-0.923195		16092	b1981	-0.148729	-0.542267			16092	b1981	-0.222865	-0.821158		16092	b1981	-0.373863	-1.56729		16092	b1981	-0.230602	-0.858069			16092	b1981	-0.158961	-0.576304		16092	b1981	-0.320028	-1.2141		16092	b1981	-0.253195	-0.935758
16093	b1982	-0.352414	-1.77193		16093	b1982	-0.142396	-0.633971		16093	b1982	-0.0316692	-0.156562			16093	b1982	-0.198303	-0.985892		16093	b1982	-0.219478	-1.04938		16093	b1982	-0.213938	-1.09726			16093	b1982	-0.269371	-1.17434		16093	b1982	-0.12197	-0.620587		16093	b1982	-0.147062	-0.748686
16094	b1983	-0.10219	-0.447745		16094	b1983	-0.294983	-1.13019		16094	b1983	-0.125499	-0.508028			16094	b1983	-0.00923132	-0.0403343		16094	b1983	-0.11531	-0.467574		16094	b1983	-0.0932712	-0.362386			16094	b1983	-0.675561	-2.31989		16094	b1983	-0.310043	-1.12662		16094	b1983	-0.231989	-0.922526
16095	b1985	-0.416189	-1.79898		16095	b1985	-0.448985	-2.22635		16095	b1985	-0.383051	-1.76645			16095	b1985	-0.388248	-1.86054		16095	b1985	-0.566723	-2.60649		16095	b1985	-0.398962	-1.78956			16095	b1985	-0.334788	-1.58891		16095	b1985	-0.497711	-2.35128		16095	b1985	-0.320308	-1.5203
16096	b1987	0.0296673	0.131402		16096	b1987	-0.131435	-0.605949		16096	b1987	-0.0318368	-0.157141			16096	b1987	0.0386638	0.184102		16096	b1987	0.0145267	0.07269		16096	b1987	-0.130444	-0.661613			16096	b1987	-0.128483	-0.54864		16096	b1987	-0.172029	-0.800784		16096	b1987	-0.0934351	-0.409561
16097	b1988	0.152863	0.535074		16097	b1988	0.257206	0.860332		16097	b1988	0.207404	0.718973			16097	b1988	0.236908	0.972634		16097	b1988	0.354844	1.13668		16097	b1988	0.328092	1.24813			16097	b1988	0.271233	0.993495		16097	b1988	0.169266	0.588703		16097	b1988	0.109386	0.396005
16098	b1990	-0.0563832	-0.303675		16098	b1990	-0.0459851	-0.23361		16098	b1990	-0.0222332	-0.114418			16098	b1990	-0.0195729	-0.106184		16098	b1990	-0.0667315	-0.380868		16098	b1990	-0.0393305	-0.194679			16098	b1990	-0.0656424	-0.311079		16098	b1990	-0.0963949	-0.508377		16098	b1990	-0.0292378	-0.137013
16099	b1991	-0.405567	-2.23184		16099	b1991	-0.405913	-2.06174		16099	b1991	-0.365082	-2.17401			16099	b1991	-0.293072	-1.6986		16099	b1991	-0.419419	-2.36839		16099	b1991	-0.504453	-2.82641			16099	b1991	-0.502791	-2.27056		16099	b1991	-0.435316	-2.16648		16099	b1991	-0.417356	-2.32563
16101	b1993	0.119411	0.614297		16101	b1993	-0.00709663	-0.0318807		16101	b1993	0.0226386	0.0963854			16101	b1993	0.0756747	0.338241		16101	b1993	0.0267052	0.113116		16101	b1993	0.0121709	0.0514753			16101	b1993	-0.224555	-0.976711		16101	b1993	-0.00473243	-0.0211541		16101	b1993	0.0753644	0.337878
16107	b1999	-0.0119679	-0.0584588		16107	b1999	0.0690392	0.302325		16107	b1999	0.0821425	0.326276			16107	b1999	0.013865	0.0554925		16107	b1999	-0.0114769	-0.0479252		16107	b1999	0.151227	0.644063			16107	b1999	0.0609422	0.24342		16107	b1999	0.031532	0.129615		16107	b1999	-0.0949078	-0.446764
16109	b2001	0.162307	1.04293		16109	b2001	0.0741084	0.493289		16109	b2001	0.158092	0.996773			16109	b2001	0.161004	1.01948		16109	b2001	0.0710628	0.422815		16109	b2001	0.104284	0.610824			16109	b2001	0.0650565	0.351335		16109	b2001	0.127589	0.811045		16109	b2001	0.134845	0.780759
16110	b2002	0.233308	1.20705		16110	b2002	0.265223	1.46388		16110	b2002	0.217649	1.20618			16110	b2002	0.283416	1.64881		16110	b2002	0.247816	1.33602		16110	b2002	0.205573	1.04405			16110	b2002	0.0698605	0.359391		16110	b2002	0.132685	0.72397		16110	b2002	0.267628	1.57692
16111	b2003	0.248316	0.877141		16111	b2003	0.153768	0.654178		16111	b2003	0.152719	0.445374			16111	b2003	0.137193	0.57056		16111	b2003	0.0740797	0.232939		16111	b2003	0.158969	0.600846			16111	b2003	-0.174162	-0.590886		16111	b2003	0.0256091	0.109797		16111	b2003	0.26538	0.955193
16112	b2004	-0.0516073	-0.228209		16112	b2004	-0.206128	-0.743159		16112	b2004	-0.0376618	-0.146036			16112	b2004	-0.138653	-0.697047		16112	b2004	-0.248503	-1.07872		16112	b2004	-0.245647	-1.12392			16112	b2004	-0.212214	-0.793398		16112	b2004	-0.336202	-1.14216		16112	b2004	-0.154485	-0.6644
16113	b2005	-0.225245	-0.804706		16113	b2005	-0.197205	-0.639113		16113	b2005	-0.134092	-0.376991			16113	b2005	-0.229545	-0.667147		16113	b2005	-0.173611	-0.442355		16113	b2005	-0.345044	-1.04842			16113	b2005	-0.129987	-0.536327		16113	b2005	-0.100923	-0.386772		16113	b2005	-0.200365	-0.533427
16114	b2006	-0.2827	-1.11933		16114	b2006	-0.157729	-0.517263		16114	b2006	-0.261828	-0.794066			16114	b2006	-0.0722236	-0.295557		16114	b2006	-0.395774	-1.51034		16114	b2006	-0.452713	-1.17765			16114	b2006	-0.315701	-1.10102		16114	b2006	-0.0166042	-0.0555579		16114	b2006	-0.311647	-0.891342
16115	b2007	-0.0381596	-0.112337		16115	b2007	-0.312456	-0.990465		16115	b2007	-0.0287311	-0.0942584			16115	b2007	-0.337656	-1.00384		16115	b2007	0.0326333	0.103332		16115	b2007	-0.127372	-0.403564			16115	b2007	-0.0980346	-0.284428		16115	b2007	0.0260486	0.0900224		16115	b2007	0.0100489	0.0287658
16116	b2008	0.237861	1.16038		16116	b2008	0.395544	1.92054		16116	b2008	0.389388	1.71718			16116	b2008	0.373449	1.54694		16116	b2008	0.403343	1.70668		16116	b2008	0.326499	1.47205			16116	b2008	0.316992	1.29277		16116	b2008	0.201706	0.925752		16116	b2008	0.330784	1.27195
16117	b2009	-0.0192867	-0.0604047		16117	b2009	0.0356661	0.094799		16117	b2009	-0.000220568	-0.000588919			16117	b2009	-0.0664315	-0.223357		16117	b2009	0.0565099	0.197386		16117	b2009	0.0224869	0.0657186			16117	b2009	0.200622	0.537948		16117	b2009	0.0169338	0.0439746		16117	b2009	0.0646047	0.198858
16118	b2010	-0.024447	-0.105786		16118	b2010	-0.0244956	-0.115398		16118	b2010	0.133034	0.645539			16118	b2010	-0.0790832	-0.310381		16118	b2010	-0.0747802	-0.323369		16118	b2010	0.0231455	0.104943			16118	b2010	-0.0782019	-0.319712		16118	b2010	-0.01309	-0.0594746		16118	b2010	0.0610011	0.276433
16119	b2011	0.0132336	0.071601		16119	b2011	-0.143794	-0.743142		16119	b2011	-0.223751	-1.11523			16119	b2011	-0.081914	-0.505385		16119	b2011	-0.189289	-1.0278		16119	b2011	-0.176937	-0.905652			16119	b2011	0.0798063	0.440296		16119	b2011	-0.144319	-0.824094		16119	b2011	-0.174266	-0.89395
16120	b2012	0.626597	1.79375		16120	b2012	0.623243	1.83639		16120	b2012	0.416354	1.17201			16120	b2012	0.70447	2.09696		16120	b2012	0.667249	1.97182		16120	b2012	0.555162	1.43434			16120	b2012	0.568919	1.56381		16120	b2012	0.411171	1.20302		16120	b2012	0.717256	2.07176
16121	b2013	0.268182	1.29738		16121	b2013	0.194099	0.946022		16121	b2013	0.146358	0.705604			16121	b2013	0.098306	0.467676		16121	b2013	0.139995	0.774007		16121	b2013	0.207776	1.0075			16121	b2013	0.140617	0.698319		16121	b2013	0.130684	0.697865		16121	b2013	0.163123	0.848394
16122	b2014	0.305738	1.88002		16122	b2014	0.421189	2.51314		16122	b2014	0.489046	2.82895			16122	b2014	-0.100318	-0.625408		16122	b2014	-0.196554	-1.22722		16122	b2014	-0.191384	-1.14888			16122	b2014	-0.0878039	-0.497201		16122	b2014	-0.162334	-0.997936		16122	b2014	-0.025676	-0.144591
16123	b2015	0.332185	1.02074		16123	b2015	0.253725	0.720853		16123	b2015	0.488017	1.57394			16123	b2015	0.425872	1.46957		16123	b2015	0.176284	0.534041		16123	b2015	0.264797	0.764695			16123	b2015	0.388337	0.997289		16123	b2015	0.376252	1.11853		16123	b2015	0.38568	1.26313
16124	b2016	0.187231	0.890585		16124	b2016	0.156208	0.716815		16124	b2016	0.237507	1.22329			16124	b2016	0.163331	0.900451		16124	b2016	0.155845	0.941941		16124	b2016	0.16094	0.810274			16124	b2016	0.176085	0.912616		16124	b2016	0.203296	0.907872		16124	b2016	0.143289	0.684507
16127	b2019	0.0101284	0.0414166		16127	b2019	-0.182546	-0.774707		16127	b2019	-0.246477	-1.07531			16127	b2019	0.0222636	0.107256		16127	b2019	0.0243517	0.0957687		16127	b2019	-0.102158	-0.441181			16127	b2019	0.00365245	0.0166788		16127	b2019	-0.0559357	-0.206903		16127	b2019	-0.0439091	-0.159771
16128	b2020	0.227277	1.11278		16128	b2020	0.0162653	0.0951552		16128	b2020	-0.0649759	-0.381689			16128	b2020	0.281264	1.45496		16128	b2020	0.230832	1.24015		16128	b2020	0.242086	1.29752			16128	b2020	0.255009	1.49756		16128	b2020	0.183425	0.915864		16128	b2020	0.247862	1.45665
16129	b2021	-0.161863	-0.766489		16129	b2021	-0.341804	-1.56577		16129	b2021	-0.364576	-1.76966			16129	b2021	-0.230051	-1.1919		16129	b2021	-0.0572563	-0.305192		16129	b2021	-0.213001	-0.920103			16129	b2021	-0.128034	-0.619085		16129	b2021	0.0114313	0.0638486		16129	b2021	-0.178118	-0.853144
16130	b2022	0.402584	1.99492		16130	b2022	0.123006	0.652954		16130	b2022	-0.0767917	-0.382481			16130	b2022	0.386112	1.94406		16130	b2022	0.173581	0.961108		16130	b2022	0.284735	1.3735			16130	b2022	0.199935	0.987506		16130	b2022	0.257392	1.41455		16130	b2022	0.362314	1.70656
16131	b2023	-0.127051	-0.627635		16131	b2023	-0.154116	-0.861824		16131	b2023	-0.375087	-1.77982			16131	b2023	-0.0389479	-0.197739		16131	b2023	-0.0723633	-0.323983		16131	b2023	-0.138556	-0.684686			16131	b2023	0.0537617	0.2764		16131	b2023	-0.113774	-0.561442		16131	b2023	0.00459682	0.022051
16132	b2024	-0.0411842	-0.109536		16132	b2024	-0.168199	-0.471021		16132	b2024	-0.333258	-0.647254			16132	b2024	0.130229	0.36708		16132	b2024	0.12275	0.350276		16132	b2024	0.03704	0.0941045			16132	b2024	-0.160078	-0.423406		16132	b2024	-0.0080037	-0.023773		16132	b2024	0.388154	0.998096
16133	b2025	-0.418166	-1.74742		16133	b2025	-0.567578	-2.15513		16133	b2025	-0.888518	-2.81167			16133	b2025	-0.470733	-1.82675		16133	b2025	-0.710308	-2.70326		16133	b2025	-0.666587	-2.49424			16133	b2025	-0.597882	-1.90469		16133	b2025	-0.403339	-1.50093		16133	b2025	-0.496179	-1.6764
[truncated: 1,929 more rows]

## Sheet: Filter Fitness - with H. alvei
Genes with negative fitness during growth with H. alvei
with H. alvei
bnumber	gene_name	gene product	Kegg module	Days
b0003	thrB	homoserine kinase	Amino acid metabolism	3
b0004	thrC	threonine synthase	Amino acid metabolism / Metabolism of cofactors and vitamins	2,3
[truncated: 143 more rows]

## Sheet: Filter Fitness with G. candidum
Genes with negative fitness during growth with G. candidum
[truncated: 144 more rows]

[truncated: 4 more sheets: Filter Fitnes w  P. camemberti, Conserved negative fitness, Pairwise-induced interactions, Pairwise-alleviated interaction]
