# Supplementary material for: Changes in the genetic requirements for microbial interactions with increasing community complexity
Source: eLife journal article supplement (doi:10.7554/elife.37072), 2018-09-13
Supplement: supp [file elife-37072-supp-v1.zip › elife_poa_e37072_Figure_3_source_data_1.xlsx]

## Sheet: Raw data - with Community
Raw data - Gene fitness values an t-score values for the 3298 genes with estimated fitness from RB-TnSeq - Growth with Community Day 1, Day 2 and Day 3
Day1					Day2					Day3
locusId	sysName	Fitness value	t-score		locusId	sysName	Fitness value	t-score		locusId	sysName	Fitness value	t-score
14146	b0001	0.223301	0.621109		14146	b0001	0.200517	0.543177		14146	b0001	0.0282848	0.0665636
14147	b0002	-0.0394846	-0.307286		14147	b0002	-0.0844313	-0.664773		14147	b0002	-0.0214153	-0.168293
14148	b0003	-0.128315	-0.820397		14148	b0003	-0.0685164	-0.474048		14148	b0003	-0.300884	-1.7431
14149	b0004	-0.16578	-0.841232		14149	b0004	-0.310044	-1.53192		14149	b0004	-0.565392	-2.63591
14150	b0005	0.0900517	0.332683		14150	b0005	0.0644635	0.263497		14150	b0005	-0.00766973	-0.0270553
14151	b0006	-0.0626203	-0.404652		14151	b0006	-0.0957044	-0.638838		14151	b0006	-0.137621	-0.862762
14152	b0007	-0.029946	-0.168955		14152	b0007	-0.117886	-0.623908		14152	b0007	-0.0272006	-0.140614
14153	b0008	0.0860016	0.506476		14153	b0008	0.0814397	0.531639		14153	b0008	0.169967	1.14202
14154	b0009	-0.121909	-0.617409		14154	b0009	-0.0193111	-0.101471		14154	b0009	-0.0900503	-0.437208
14155	b0010	0.0026254	0.00969291		14155	b0010	-0.0266262	-0.115817		14155	b0010	-0.0664156	-0.22984
14156	b0011	-0.0548607	-0.318237		14156	b0011	-0.0817897	-0.476006		14156	b0011	0.0105446	0.0549345
14158	b0013	-0.343141	-1.14835		14158	b0013	-0.240646	-0.741391		14158	b0013	-0.233397	-0.843785
14160	b0015	-0.340145	-1.87374		14160	b0015	-0.116108	-0.646226		14160	b0015	-0.293033	-1.45736
14164	b0019	-0.148642	-1.08944		14164	b0019	-0.0975794	-0.71918		14164	b0019	-5.43657	-12.4823
14165	b0020	-0.00919553	-0.0630006		14165	b0020	-0.104214	-0.793318		14165	b0020	0.0540652	0.368185
14173	b0028	0.355203	0.980983		14173	b0028	0.344716	0.94906		14173	b0028	0.118167	0.265048
14175	b0030	-0.232343	-1.39423		14175	b0030	-0.236544	-1.16702		14175	b0030	-0.344185	-2.02435
14177	b0032	-0.394237	-1.43517		14177	b0032	-0.245411	-1.10066		14177	b0032	-0.555082	-2.03316
14178	b0033	-0.116601	-0.907783		14178	b0033	-0.148956	-1.18947		14178	b0033	-0.392986	-3.08804
14180	b0034	-0.179986	-1.25505		14180	b0034	-0.256396	-1.81721		14180	b0034	-0.33089	-2.25465
14181	b0035	-0.278597	-1.12706		14181	b0035	-0.194097	-0.799657		14181	b0035	-0.398843	-1.64011
14182	b0036	0.0409659	0.256266		14182	b0036	0.0445987	0.267245		14182	b0036	0.0575527	0.308983
14183	b0037	-0.242703	-1.77689		14183	b0037	-0.209894	-1.58054		14183	b0037	-0.174736	-1.23305
14184	b0038	-0.076894	-0.514495		14184	b0038	-0.0791432	-0.583112		14184	b0038	-0.106167	-0.747359
14185	b0039	-0.039223	-0.261127		14185	b0039	-0.00951627	-0.0543711		14185	b0039	-0.00117662	-0.00719178
14186	b0040	-0.158288	-1.07137		14186	b0040	-0.0955087	-0.697193		14186	b0040	-0.226456	-1.51083
14187	b0041	-0.296271	-1.40216		14187	b0041	-0.155225	-0.735233		14187	b0041	-0.247267	-1.06618
14188	b0042	0.174512	0.920498		14188	b0042	0.00865303	0.0443145		14188	b0042	0.11936	0.584059
14189	b0043	-0.257992	-1.29944		14189	b0043	-0.290082	-1.61887		14189	b0043	-0.341269	-1.61979
14190	b0044	-0.0932891	-0.316934		14190	b0044	-0.00870535	-0.0311961		14190	b0044	0.0788788	0.253786
14191	b0045	0.0837824	0.472399		14191	b0045	-0.019832	-0.109881		14191	b0045	0.0870906	0.48427
14192	b0046	-0.514306	-3.01183		14192	b0046	-0.432492	-2.71747		14192	b0046	-0.438303	-2.19346
14193	b0047	-0.0299893	-0.230224		14193	b0047	-0.0906428	-0.692435		14193	b0047	-0.138932	-0.981021
14196	b0050	-0.1736	-0.917309		14196	b0050	-0.019035	-0.119663		14196	b0050	-0.0919085	-0.507811
14198	b0052	-0.0320309	-0.19156		14198	b0052	-0.0137135	-0.0929513		14198	b0052	0.0836165	0.482164
14201	b0055	-0.546297	-2.36265		14201	b0055	-0.471716	-2.45322		14201	b0055	-0.51071	-2.32706
14204	b0058	-0.303012	-1.32639		14204	b0058	-0.103073	-0.556161		14204	b0058	-0.305782	-1.44802
14205	b0059	0.77025	6.15096		14205	b0059	0.813476	6.46782		14205	b0059	0.774776	5.96484
14206	b0060	-0.0873287	-0.631915		14206	b0060	-0.117322	-0.857261		14206	b0060	-0.116475	-0.807093
14207	b0061	-0.418904	-1.65451		14207	b0061	-0.567234	-2.70049		14207	b0061	-0.536654	-2.338
14210	b0064	-0.290101	-1.51741		14210	b0064	-0.267521	-1.33072		14210	b0064	-0.14867	-0.82881
14211	b0065	-0.0531844	-0.228183		14211	b0065	-0.134343	-0.670089		14211	b0065	0.0552515	0.279235
14212	b0066	0.221368	1.16416		14212	b0066	0.222647	1.24457		14212	b0066	0.149921	0.827393
14213	b0067	-0.055191	-0.43269		14213	b0067	-0.0446309	-0.352709		14213	b0067	-0.0691583	-0.503328
14214	b0068	-0.0667937	-0.443521		14214	b0068	-0.0204223	-0.141707		14214	b0068	0.0128801	0.0886191
14215	b0069	0.185848	1.29744		14215	b0069	0.161246	1.0685		14215	b0069	0.239646	1.46205
14217	b0071	-0.0592604	-0.340676		14217	b0071	-0.136564	-0.742196		14217	b0071	-0.0650107	-0.378398
14218	b0072	-0.0653696	-0.407971		14218	b0072	-0.0646117	-0.42181		14218	b0072	-0.098466	-0.605368
14219	b0073	0.247953	1.4428		14219	b0073	0.173881	1.00173		14219	b0073	0.24931	1.31578
14220	b0074	-0.000885972	-0.00547488		14220	b0074	0.0620236	0.407087		14220	b0074	0.00750623	0.0481855
14221	b0075	0.145059	1.02062		14221	b0075	-0.0580825	-0.427852		14221	b0075	0.0614797	0.419885
14222	b0076	-0.185415	-1.35889		14222	b0076	-0.147324	-1.08673		14222	b0076	-0.141799	-1.01878
14224	b0078	-0.184706	-1.09074		14224	b0078	-0.197157	-1.30868		14224	b0078	-0.254397	-1.72631
14227	b0081	-0.0459177	-0.22613		14227	b0081	-0.041456	-0.195749		14227	b0081	-0.0325547	-0.152411
14238	b0092	-0.463325	-2.62769		14238	b0092	-0.522746	-2.88993		14238	b0092	-0.692127	-2.76787
14243	b0097	0.0763194	0.246504		14243	b0097	0.200266	0.554372		14243	b0097	0.101013	0.323951
14245	b0099	0.107274	0.388464		14245	b0099	0.223293	0.991841		14245	b0099	0.0759202	0.223694
14247	b0101	0.498149	1.08898		14247	b0101	0.577594	1.60898		14247	b0101	0.761595	1.71314
14248	b0102	-0.134727	-0.586124		14248	b0102	-0.0585471	-0.267541		14248	b0102	0.0486833	0.199726
14250	b0104	-0.0365806	-0.21469		14250	b0104	-0.162581	-1.00633		14250	b0104	-0.112745	-0.681463
14252	b0106	-0.0715714	-0.459122		14252	b0106	-0.0352841	-0.222912		14252	b0106	-0.0220555	-0.13405
14253	b0107	0.142202	0.764734		14253	b0107	0.139782	0.849835		14253	b0107	0.1092	0.6645
14254	b0108	-0.200239	-0.560713		14254	b0108	-0.0142348	-0.0479888		14254	b0108	-0.08953	-0.240731
14255	b0109	0.0542335	0.218515		14255	b0109	0.0979789	0.47759		14255	b0109	0.0696651	0.317725
14256	b0110	-0.173548	-0.79694		14256	b0110	0.00662922	0.0291798		14256	b0110	0.0013826	0.00588596
14257	b0111	-0.271331	-1.86608		14257	b0111	-0.20542	-1.38177		14257	b0111	-0.150591	-0.918658
14258	b0112	0.00914142	0.0620876		14258	b0112	-0.0206448	-0.14887		14258	b0112	0.112531	0.760519
14259	b0113	-0.918204	-2.36504		14259	b0113	-1.26625	-3.01162		14259	b0113	-1.15658	-2.45002
14263	b0117	0.053995	0.410399		14263	b0117	0.0617202	0.482256		14263	b0117	0.112376	0.846189
14265	b0119	-0.156153	-0.911701		14265	b0119	-0.187861	-0.965689		14265	b0119	-0.118034	-0.658522
14266	b0120	-0.308958	-1.78609		14266	b0120	-0.24396	-1.53177		14266	b0120	-0.316126	-1.78522
14267	b0121	-0.250213	-1.10627		14267	b0121	-0.17068	-0.889382		14267	b0121	-0.246039	-1.19351
14268	b0122	0.160242	0.557128		14268	b0122	0.206305	0.951908		14268	b0122	0.0524479	0.285619
14269	b0123	-0.30543	-1.80123		14269	b0123	-0.224455	-1.32427		14269	b0123	-0.230948	-1.37593
14270	b0124	-0.0192471	-0.146997		14270	b0124	-0.00783664	-0.0636832		14270	b0124	-0.00869601	-0.0669815
14271	b0125	-0.484387	-1.24398		14271	b0125	-0.318776	-0.698279		14271	b0125	-0.411012	-0.853965
14273	b0127	-0.418568	-1.67952		14273	b0127	-0.35868	-1.29448		14273	b0127	-0.0919897	-0.32957
14274	b0128	-0.298026	-1.45533		14274	b0128	-0.0947099	-0.504455		14274	b0128	-0.122147	-0.637682
14275	b0129	0.370408	1.7617		14275	b0129	0.359668	1.9255		14275	b0129	0.374512	1.93703
14276	b0130	-0.102445	-0.598633		14276	b0130	-0.0764158	-0.451674		14276	b0130	-0.00759492	-0.0430612
14277	b0131	-0.041294	-0.126413		14277	b0131	-0.103801	-0.314105		14277	b0131	-0.116814	-0.302211
14278	b0132	0.09874	0.639184		14278	b0132	0.074667	0.540753		14278	b0132	0.074621	0.501035
14279	b0133	-0.04846	-0.289338		14279	b0133	0.128656	0.835472		14279	b0133	0.122794	0.744742
14280	b0134	-0.00432603	-0.0274183		14280	b0134	-0.273871	-1.53959		14280	b0134	-0.0848716	-0.402657
14281	b0135	-0.193113	-1.25616		14281	b0135	-0.172318	-1.13728		14281	b0135	-0.151646	-0.983537
14283	b0137	-0.371591	-1.71629		14283	b0137	-0.254198	-1.31204		14283	b0137	-0.216892	-0.994782
14284	b0138	-0.688107	-3.75222		14284	b0138	-0.487902	-2.73975		14284	b0138	-0.532109	-2.80656
14285	b0139	-0.168228	-1.48644		14285	b0139	-0.0727451	-0.651056		14285	b0139	-0.0853573	-0.749005
14286	b0140	-0.0355054	-0.269945		14286	b0140	-0.0565187	-0.417448		14286	b0140	-0.00292684	-0.0229439
14287	b0141	-0.778071	-3.3588		14287	b0141	-0.683102	-2.89845		14287	b0141	-0.43066	-2.0107
14289	b0143	-0.596507	-1.52396		14289	b0143	-0.602018	-1.31371		14289	b0143	-0.536438	-1.23367
14290	b0144	-0.0483755	-0.252026		14290	b0144	-0.0486279	-0.254252		14290	b0144	0.106674	0.608651
14292	b0146	0.00452863	0.0240691		14292	b0146	0.04303	0.247064		14292	b0146	0.161036	0.990443
14293	b0147	0.181135	0.844312		14293	b0147	0.146203	0.779971		14293	b0147	0.215274	0.967317
14294	b0148	-0.0596083	-0.432131		14294	b0148	-0.0243076	-0.183685		14294	b0148	0.0152089	0.111969
14295	b0149	-0.906125	-5.54289		14295	b0149	-0.740644	-4.6235		14295	b0149	-1.0085	-6.31091
14296	b0150	0.0198898	0.149534		14296	b0150	0.0712263	0.559725		14296	b0150	-0.026539	-0.210818
14297	b0151	-0.22315	-1.23406		14297	b0151	-0.114825	-0.604415		14297	b0151	-0.332996	-1.65338
14298	b0152	-0.0195179	-0.0939801		14298	b0152	0.100527	0.511157		14298	b0152	-0.109044	-0.527946
14299	b0153	-0.00441199	-0.030386		14299	b0153	-0.00511326	-0.0366958		14299	b0153	-0.0946421	-0.62911
14301	b0155	-0.238205	-1.59265		14301	b0155	-0.139628	-0.980652		14301	b0155	-0.174331	-1.1188
14303	b0157	-0.313713	-1.46844		14303	b0157	-0.329262	-1.72248		14303	b0157	-0.279037	-1.09917
14304	b0158	-0.161462	-0.764704		14304	b0158	0.0167236	0.0991416		14304	b0158	-0.173114	-0.934794
14306	b0160	-0.142585	-1.26411		14306	b0160	-0.116663	-1.045		14306	b0160	-0.0405758	-0.358045
14307	b0161	-0.22029	-1.21984		14307	b0161	-0.197459	-0.971004		14307	b0161	-0.118128	-0.424587
14308	b0162	0.161541	0.8748		14308	b0162	0.230635	1.34374		14308	b0162	0.273399	1.44721
14309	b0163	-0.239055	-0.955369		14309	b0163	-0.151656	-0.690776		14309	b0163	-0.225967	-1.05576
14310	b0164	-0.170739	-0.903296		14310	b0164	-0.173312	-0.88264		14310	b0164	-0.335265	-1.67727
14313	b0167	-0.256184	-0.514159		14313	b0167	0.0609862	0.130765		14313	b0167	-0.268293	-0.493938
14324	b0178	0.361086	1.18894		14324	b0178	0.374516	1.41902		14324	b0178	0.475959	1.45353
14329	b0183	0.414572	1.61678		14329	b0183	0.310287	1.25659		14329	b0183	0.472984	2.06413
14332	b0186	-0.0354484	-0.252227		14332	b0186	0.000892028	0.00626146		14332	b0186	-0.00646014	-0.0429523
14333	b0187	0.113884	0.499463		14333	b0187	0.0873241	0.365175		14333	b0187	0.0543437	0.198394
14335	b0189	-0.377923	-1.38467		14335	b0189	-0.355054	-1.04257		14335	b0189	-0.546176	-1.60088
14336	b0190	0.214521	1.25678		14336	b0190	0.304675	1.98779		14336	b0190	0.357276	2.15061
14337	b0191	0.158228	0.453446		14337	b0191	0.318152	1.37408		14337	b0191	0.428333	1.40412
14338	b0192	-0.156253	-0.709871		14338	b0192	-0.0315285	-0.132245		14338	b0192	-0.0323179	-0.173138
14339	b0193	0.0953528	0.534687		14339	b0193	0.0747031	0.413024		14339	b0193	0.105375	0.578363
14341	b0195	0.225278	0.968534		14341	b0195	0.378909	1.89924		14341	b0195	0.450725	2.16599
14342	b0196	0.264589	1.18464		14342	b0196	0.256638	1.13392		14342	b0196	0.182415	0.769504
14343	b0197	-0.380563	-1.98345		14343	b0197	-0.406304	-2.04977		14343	b0197	-0.384661	-1.96683
14344	b0198	0.00395817	0.0282029		14344	b0198	0.100117	0.674491		14344	b0198	0.147265	1.02662
14345	b0199	0.287399	1.97759		14345	b0199	0.296376	2.27189		14345	b0199	0.299292	2.19515
14347	b0207	-0.138915	-0.818647		14347	b0207	-0.130423	-0.849758		14347	b0207	-0.301711	-1.57201
14348	b0208	-0.11894	-0.612127		14348	b0208	-0.0941718	-0.479577		14348	b0208	-0.164629	-0.80942
14349	b0209	0.209212	1.22982		14349	b0209	0.190738	1.18177		14349	b0209	0.240352	1.33351
14350	b0210	-0.0157625	-0.0741521		14350	b0210	0.27211	1.22407		14350	b0210	0.0258747	0.0994772
14351	b0211	0.0165515	0.105487		14351	b0211	0.0474132	0.298362		14351	b0211	0.00591112	0.0337403
14352	b0212	-1.21773	-2.32541		14352	b0212	-0.848876	-2.10776		14352	b0212	-0.920702	-2.02933
14353	b0213	-0.0987027	-0.366922		14353	b0213	0.10186	0.393283		14353	b0213	-0.0509131	-0.227031
14356	b0217	0.0202096	0.0763054		14356	b0217	-0.0088881	-0.0351288		14356	b0217	-0.0714938	-0.230179
14358	b0219	0.146487	0.507196		14358	b0219	-0.101366	-0.430758		14358	b0219	-0.0876782	-0.254259
14359	b0220	0.0473691	0.213963		14359	b0220	-0.0258918	-0.115091		14359	b0220	-0.00355822	-0.0160738
14360	b0221	0.009803	0.073786		14360	b0221	0.106368	0.803358		14360	b0221	0.0101065	0.0700599
14362	b0223	0.205587	0.993464		14362	b0223	0.104512	0.493319		14362	b0223	0.212059	1.1088
14363	b0224	0.0451611	0.274897		14363	b0224	0.0264448	0.153767		14363	b0224	0.1206	0.773585
14364	b0225	-0.898232	-3.29998		14364	b0225	-0.724187	-2.09615		14364	b0225	-0.63794	-2.19526
14365	b0226	-0.0890807	-0.276033		14365	b0226	-0.45208	-1.62066		14365	b0226	-0.346408	-0.970667
14366	b0227	0.254765	1.12092		14366	b0227	0.180949	0.91001		14366	b0227	0.0125001	0.0498027
14367	b0228	-0.203756	-0.835684		14367	b0228	-0.0620799	-0.28874		14367	b0228	-0.0405568	-0.132709
14368	b0229	-0.203737	-1.30458		14368	b0229	-0.0569448	-0.34081		14368	b0229	-0.0829607	-0.461128
14369	b0230	0.162791	0.872815		14369	b0230	0.0110532	0.0594719		14369	b0230	0.134247	0.669159
14370	b0231	0.017324	0.0875324		14370	b0231	0.0750791	0.415754		14370	b0231	-0.00292684	-0.0146876
14372	b0233	-0.339553	-1.4954		14372	b0233	-0.342598	-1.15163		14372	b0233	-0.250737	-1.08798
14374	b0235	0.121215	0.694706		14374	b0235	0.0831703	0.503294		14374	b0235	0.00806892	0.0487473
14375	b0236	0.146922	0.407398		14375	b0236	0.188061	0.583193		14375	b0236	0.267579	0.94431
14376	b0237	-0.370799	-2.07451		14376	b0237	-0.386664	-2.40294		14376	b0237	-0.325124	-2.02973
14377	b0238	0.232098	0.73607		14377	b0238	0.0447969	0.128105		14377	b0238	0.0652436	0.168724
14378	b0239	0.0210377	0.103434		14378	b0239	0.00819823	0.0371217		14378	b0239	0.145614	0.694856
14379	b0240	0.152164	0.987449		14379	b0240	0.0355343	0.222302		14379	b0240	0.0297974	0.188353
14380	b0241	0.0777486	0.589698		14380	b0241	0.0267822	0.203319		14380	b0241	0.103627	0.7771
14381	b0242	0.0505497	0.220897		14381	b0242	-0.0648071	-0.342986		14381	b0242	0.00917052	0.0354141
14382	b0243	-0.415735	-2.14578		14382	b0243	-0.24938	-1.36958		14382	b0243	-0.23679	-1.17477
14383	b0245	0.150713	0.700208		14383	b0245	0.132261	0.633095		14383	b0245	0.153649	0.755836
14384	b0246	0.2521	1.2364		14384	b0246	0.212391	1.00822		14384	b0246	0.206383	1.15298
14385	b0247	-0.692246	-1.27772		14385	b0247	-0.990228	-1.78465		14385	b0247	-0.989201	-1.69578
14386	b0248	0.338276	0.929224		14386	b0248	0.29653	0.862773		14386	b0248	0.285748	0.889894
14387	b0249	-0.344504	-1.02274		14387	b0249	-0.549961	-2.00975		14387	b0249	-0.495394	-1.50553
14388	b0250	-0.0163828	-0.057271		14388	b0250	-0.0122571	-0.0529521		14388	b0250	-0.0589919	-0.241047
14389	b0251	0.998177	3.60294		14389	b0251	1.11189	3.82051		14389	b0251	0.534727	1.5241
14390	b0252	0.317772	1.29839		14390	b0252	0.299551	1.3536		14390	b0252	0.217082	0.915078
14391	b0253	0.077309	0.4402		14391	b0253	0.016316	0.105965		14391	b0253	-0.0353471	-0.206598
14392	b0254	-0.0234296	-0.128802		14392	b0254	-0.0582203	-0.3265		14392	b0254	-0.0288166	-0.147135
14396	b0258	0.0239056	0.108435		14396	b0258	0.00206322	0.00910501		14396	b0258	-0.00196446	-0.00901917
14398	b0260	-0.0563284	-0.282949		14398	b0260	-0.0365044	-0.206405		14398	b0260	-0.0247822	-0.134165
14399	b0261	-0.0814006	-0.398596		14399	b0261	-0.135016	-0.639959		14399	b0261	-0.122267	-0.653074
14400	b0262	0.333983	2.11566		14400	b0262	0.248477	1.56639		14400	b0262	0.228128	1.25851
14401	b0263	-0.364987	-1.06307		14401	b0263	-0.309491	-1.04887		14401	b0263	-0.723236	-2.35888
14404	b0266	0.320439	1.84641		14404	b0266	0.244147	1.44882		14404	b0266	0.374862	2.10108
14405	b0267	0.168568	1.1261		14405	b0267	0.0903847	0.601948		14405	b0267	0.173136	1.04529
14406	b0268	0.452877	2.22057		14406	b0268	0.470814	2.33081		14406	b0268	0.569536	2.77721
14407	b0269	0.189839	1.20279		14407	b0269	0.128935	0.809269		14407	b0269	0.0306219	0.195236
14408	b0270	0.306817	1.84756		14408	b0270	0.118433	0.610111		14408	b0270	0.216522	1.23959
14409	b0271	0.0405909	0.261752		14409	b0271	-0.112641	-0.744662		14409	b0271	-0.0734784	-0.468719
14410	b0272	0.270909	1.41026		14410	b0272	0.251042	1.43698		14410	b0272	0.315018	1.53938
14411	b0273	0.108258	0.650909		14411	b0273	0.041936	0.25091		14411	b0273	0.164894	1.01556
14414	b0276	0.148536	1.10773		14414	b0276	0.090753	0.67643		14414	b0276	0.0422875	0.287812
14415	b0277	0.0706137	0.542298		14415	b0277	0.0458528	0.363778		14415	b0277	0.0091402	0.0707379
14416	b0278	-0.4004	-1.69717		14416	b0278	-0.353733	-1.69641		14416	b0278	-0.393365	-2.02588
14418	b0280	-0.00756264	-0.033451		14418	b0280	-0.0957156	-0.413233		14418	b0280	-0.133632	-0.539227
14419	b0281	0.357382	1.86449		14419	b0281	0.256454	1.50519		14419	b0281	0.252302	1.35925
14421	b0283	0.0048631	0.0256917		14421	b0283	-0.0537925	-0.305709		14421	b0283	-0.0542449	-0.2687
14422	b0284	0.0991958	0.658404		14422	b0284	-0.00100879	-0.0068492		14422	b0284	0.0175391	0.106124
14423	b0285	0.2498	1.39636		14423	b0285	0.320636	1.7652		14423	b0285	0.269318	1.37824
14424	b0286	0.184676	0.765094		14424	b0286	0.130669	0.564287		14424	b0286	0.0883317	0.361164
14425	b0287	-0.0558094	-0.349377		14425	b0287	-0.0932983	-0.62727		14425	b0287	-0.113795	-0.738388
14426	b0288	0.301342	2.13164		14426	b0288	0.273614	1.97394		14426	b0288	0.222048	1.55221
14427	b0289	0.205952	1.16902		14427	b0289	0.071658	0.418638		14427	b0289	0.119928	0.704756
14428	b0290	0.341533	2.03432		14428	b0290	0.294504	1.78377		14428	b0290	0.204087	1.16837
14429	b0291	0.218567	1.55029		14429	b0291	0.262778	1.9439		14429	b0291	0.255487	1.885
14430	b0292	0.302685	1.60688		14430	b0292	0.171924	0.927224		14430	b0292	0.246916	1.28198
14431	b0293	0.27652	1.55788		14431	b0293	0.277588	1.6734		14431	b0293	0.208621	1.17327
14432	b0294	-0.675116	-1.75647		14432	b0294	-0.604409	-1.88734		14432	b0294	-0.429496	-0.94823
14433	b0295	0.170745	0.682997		14433	b0295	0.141004	0.705741		14433	b0295	0.0975058	0.365242
14434	b0296	0.481582	0.908436		14434	b0296	0.554807	1.0557		14434	b0296	0.19957	0.444068
14435	b0297	0.00934996	0.0260603		14435	b0297	0.296208	0.919857		14435	b0297	-0.0192892	-0.0548951
14438	b0300	-0.303419	-0.989885		14438	b0300	-0.157804	-0.512335		14438	b0300	-0.147663	-0.445385
14439	b0301	-0.0455511	-0.197679		14439	b0301	-0.0776552	-0.366032		14439	b0301	-0.0955729	-0.394044
14442	b0304	0.0451903	0.37093		14442	b0304	0.0351069	0.286248		14442	b0304	-0.0110678	-0.0897573
14443	b0305	-0.0600222	-0.308242		14443	b0305	-0.232583	-1.25798		14443	b0305	-0.163742	-0.83922
14444	b0306	0.0728677	0.414145		14444	b0306	0.104418	0.589676		14444	b0306	0.0320451	0.186825
14445	b0307	-0.0839089	-0.42069		14445	b0307	-0.0102462	-0.0506672		14445	b0307	-0.132576	-0.67587
14446	b0308	-0.125172	-0.600227		14446	b0308	-0.18596	-0.892909		14446	b0308	-0.242261	-1.07783
14449	b0311	-0.776013	-5.37511		14449	b0311	-0.524259	-3.48976		14449	b0311	-0.689053	-4.62116
14450	b0312	-0.361886	-2.41567		14450	b0312	-0.257859	-1.69379		14450	b0312	-0.432753	-2.64571
14451	b0313	-0.0944373	-0.435293		14451	b0313	-0.102944	-0.531665		14451	b0313	-0.142359	-0.624047
14452	b0314	-0.785874	-4.88298		14452	b0314	-0.434308	-2.67069		14452	b0314	-0.587704	-3.83911
14453	b0315	0.0300562	0.250569		14453	b0315	0.0276734	0.228099		14453	b0315	0.0402634	0.332969
14454	b0316	0.098284	0.610009		14454	b0316	0.0612193	0.385233		14454	b0316	0.00269591	0.0165788
14455	b0317	-0.0432208	-0.18802		14455	b0317	-0.0406577	-0.159409		14455	b0317	-0.153637	-0.577314
14456	b0318	0.151408	0.787171		14456	b0318	-0.125316	-0.679234		14456	b0318	-0.215221	-1.08127
14457	b0319	-0.151098	-0.82465		14457	b0319	-0.083909	-0.502177		14457	b0319	-0.214105	-1.21216
14458	b0320	-0.0607767	-0.358033		14458	b0320	-0.0289762	-0.177168		14458	b0320	-0.10788	-0.620392
14459	b0321	0.271178	1.82728		14459	b0321	0.327894	2.4085		14459	b0321	0.221232	1.55201
14461	b0323	-0.126393	-0.763556		14461	b0323	-0.163804	-0.903937		14461	b0323	-0.202356	-1.14985
14462	b0324	-0.0659174	-0.430776		14462	b0324	-0.0186831	-0.138763		14462	b0324	-0.0540914	-0.401314
14463	b0325	-0.0045994	-0.0291248		14463	b0325	0.0387958	0.259768		14463	b0325	-0.0310779	-0.20362
14465	b0327	0.179373	0.729275		14465	b0327	0.217327	0.83376		14465	b0327	0.174787	0.724487
14466	b0328	-0.0109173	-0.0671155		14466	b0328	-0.00818373	-0.0532335		14466	b0328	-0.0113554	-0.0716784
14467	b0329	-0.0771854	-0.427515		14467	b0329	-0.0914684	-0.500588		14467	b0329	-0.126487	-0.540556
14468	b0330	-0.0818238	-0.486558		14468	b0330	-0.15888	-0.913608		14468	b0330	-0.158658	-1.0133
14469	b0331	0.251061	0.636078		14469	b0331	0.217121	0.605113		14469	b0331	0.123878	0.337707
14471	b0333	0.146611	0.795852		14471	b0333	0.215508	1.16748		14471	b0333	0.165956	0.931377
14472	b0334	-0.369216	-1.63849		14472	b0334	-0.359896	-1.54443		14472	b0334	-0.343503	-1.76313
14473	b0335	0.0753925	0.436153		14473	b0335	0.0282923	0.175186		14473	b0335	0.052722	0.286402
14474	b0336	0.0776543	0.375301		14474	b0336	0.0692458	0.399044		14474	b0336	-0.015018	-0.0782808
14475	b0337	0.414737	2.45858		14475	b0337	0.423262	2.55827		14475	b0337	0.431529	2.76457
14476	b0338	-0.0204469	-0.0627598		14476	b0338	0.247053	0.969123		14476	b0338	0.080528	0.267801
14477	b0339	0.573534	2.62195		14477	b0339	0.570995	2.59185		14477	b0339	0.574075	2.70819
14479	b0341	0.458247	2.44974		14479	b0341	0.431515	2.34815		14479	b0341	0.473644	2.52825
14480	b0342	-0.0236108	-0.152889		14480	b0342	0.0041574	0.028138		14480	b0342	-0.105663	-0.704125
14481	b0343	0.0765593	0.574651		14481	b0343	-0.00971488	-0.0715749		14481	b0343	0.0111619	0.0825489
14482	b0344	-0.0954706	-0.447501		14482	b0344	-0.0795708	-0.451625		14482	b0344	-0.374417	-1.76853
14483	b0345	0.103107	0.610135		14483	b0345	0.151458	0.984412		14483	b0345	0.0975615	0.629509
14484	b0346	0.190159	0.598892		14484	b0346	0.0306616	0.0960692		14484	b0346	-0.0408461	-0.161513
14485	b0347	-0.0214719	-0.136166		14485	b0347	0.00581241	0.0350043		14485	b0347	-0.00292684	-0.0177578
14486	b0348	0.0464997	0.255021		14486	b0348	0.113107	0.662136		14486	b0348	0.120635	0.61431
14487	b0349	0.371353	2.01458		14487	b0349	0.221426	1.32249		14487	b0349	0.335834	1.91536
14488	b0350	0.177557	1.02988		14488	b0350	0.214071	1.2081		14488	b0350	0.137526	0.649389
14489	b0351	0.110312	0.688629		14489	b0351	0.0256253	0.159654		14489	b0351	0.209093	1.42316
14490	b0352	0.290526	0.946299		14490	b0352	0.462123	1.63977		14490	b0352	0.148701	0.428645
14491	b0353	-0.107629	-0.513545		14491	b0353	-0.373899	-1.83167		14491	b0353	-0.17629	-0.803912
14492	b0354	0.00924563	0.0455412		14492	b0354	0.0877503	0.495319		14492	b0354	0.0615712	0.348465
14493	b0355	0.100628	0.557746		14493	b0355	0.114245	0.625047		14493	b0355	0.0869111	0.418078
14494	b0356	0.185748	1.01067		14494	b0356	0.145029	0.875238		14494	b0356	0.116674	0.632205
14496	b0358	-0.153266	-1.05449		14496	b0358	-0.215437	-1.46023		14496	b0358	-0.165269	-1.09843
14501	b0363	0.12445	0.96595		14501	b0363	0.203379	1.60079		14501	b0363	0.181754	1.4659
14502	b0364	-0.925581	-3.09457		14502	b0364	-1.2482	-4.14423		14502	b0364	-1.3256	-3.60209
14503	b0365	-0.0855827	-0.348339		14503	b0365	0.0299405	0.130196		14503	b0365	0.0434879	0.179
14504	b0366	0.192989	1.05832		14504	b0366	0.057807	0.357029		14504	b0366	0.120899	0.647128
14505	b0367	-0.291123	-1.51152		14505	b0367	-0.213816	-1.12247		14505	b0367	-0.0895176	-0.439284
14506	b0368	0.0373381	0.143358		14506	b0368	-0.120565	-0.502628		14506	b0368	0.0776764	0.257211
14513	b0375	0.00723463	0.0227824		14513	b0375	-0.00588889	-0.0193791		14513	b0375	-0.120969	-0.356434
14514	b0376	-0.0668166	-0.498613		14514	b0376	0.0103722	0.0765269		14514	b0376	0.0104073	0.0716443
14515	b0377	0.149017	1.06008		14515	b0377	0.209617	1.50243		14515	b0377	0.214905	1.51886
14516	b0378	0.0443111	0.269698		14516	b0378	0.0494	0.305412		14516	b0378	0.145332	0.832033
14517	b0379	-0.340215	-1.72944		14517	b0379	-0.421848	-2.46818		14517	b0379	-0.449544	-1.83004
14518	b0380	-0.306311	-1.55397		14518	b0380	-0.197257	-1.21894		14518	b0380	-0.23879	-1.03166
14519	b0381	-0.00309293	-0.0140779		14519	b0381	0.127365	0.702852		14519	b0381	-0.0318902	-0.142587
14520	b0382	0.120162	0.787788		14520	b0382	0.0461638	0.286986		14520	b0382	0.188704	1.23141
14521	b0383	0.0836286	0.634292		14521	b0383	0.158054	1.24169		14521	b0383	0.180683	1.36497
14522	b0384	0.351645	0.983616		14522	b0384	0.325714	0.874291		14522	b0384	0.345266	0.938759
14523	b0385	0.0572314	0.270461		14523	b0385	0.116321	0.617389		14523	b0385	0.0864609	0.403317
14525	b0387	0.325448	1.68876		14525	b0387	0.264252	1.19778		14525	b0387	0.457209	2.6092
14526	b0388	-0.266778	-0.787252		14526	b0388	-0.338962	-1.31346		14526	b0388	-0.286425	-0.925686
14528	b0390	0.00586208	0.0293216		14528	b0390	0.0220415	0.108723		14528	b0390	-0.0702904	-0.366255
14529	b0391	0.0101377	0.0560397		14529	b0391	0.0625864	0.306321		14529	b0391	-0.00195018	-0.010739
14530	b0392	0.15347	1.03695		14530	b0392	0.13862	0.951657		14530	b0392	0.116798	0.729059
14531	b0393	0.0847209	0.491865		14531	b0393	0.209721	1.20198		14531	b0393	0.209781	1.07663
14532	b0394	0.206686	1.15783		14532	b0394	0.172752	0.977427		14532	b0394	0.165966	0.806561
14534	b0396	-0.0464712	-0.346158		14534	b0396	-0.0680051	-0.503585		14534	b0396	-0.0974581	-0.696859
14535	b0397	0.0260268	0.168466		14535	b0397	0.095768	0.608684		14535	b0397	0.14211	0.917461
14536	b0398	-0.145114	-0.681024		14536	b0398	-0.0402581	-0.195497		14536	b0398	-0.116216	-0.419058
14537	b0399	-0.0708553	-0.366201		14537	b0399	0.0314133	0.186168		14537	b0399	-0.00239147	-0.0122073
14538	b0400	-0.830353	-3.17246		14538	b0400	-1.07281	-4.60893		14538	b0400	-0.717726	-3.0547
14539	b0401	-1.78972	-10.1284		14539	b0401	-1.96559	-12.2449		14539	b0401	-1.4626	-9.01301
14540	b0402	0.0206188	0.141351		14540	b0402	0.000892028	0.00617491		14540	b0402	0.0463307	0.306898
14541	b0403	-0.00432603	-0.0270362		14541	b0403	-0.01171	-0.0817395		14541	b0403	0.0579673	0.387081
14542	b0404	0.50487	1.94861		14542	b0404	0.448485	1.76355		14542	b0404	0.628257	2.59737
14543	b0405	-0.309185	-1.07149		14543	b0405	-0.479095	-1.32656		14543	b0405	-0.361116	-1.02164
14544	b0406	-1.36375	-2.8282		14544	b0406	-1.16401	-2.58404		14544	b0406	-0.97161	-2.4746
14548	b0410	-0.0645669	-0.283549		14548	b0410	0.0178308	0.0788333		14548	b0410	-0.0508707	-0.216413
14549	b0411	-0.011851	-0.0744082		14549	b0411	-0.0327025	-0.218012		14549	b0411	0.0779196	0.476944
14550	b0412	0.148382	0.46687		14550	b0412	0.190225	0.74032		14550	b0412	0.154301	0.523392
14556	b0418	-0.216308	-0.551937		14556	b0418	-0.07394	-0.204784		14556	b0418	-0.0411597	-0.131667
14557	b0419	0.0872094	0.474552		14557	b0419	0.0303307	0.151441		14557	b0419	0.0408092	0.209971
14561	b0423	0.259333	1.14594		14561	b0423	0.258456	1.10765		14561	b0423	0.319411	1.39228
14562	b0424	0.226898	1.15374		14562	b0424	0.178019	0.975886		14562	b0424	0.291361	1.42647
14563	b0425	-0.115001	-0.618274		14563	b0425	-0.0251823	-0.145502		14563	b0425	0.0566206	0.327189
14564	b0426	0.19429	0.883467		14564	b0426	0.443371	2.09631		14564	b0426	0.326525	1.56415
14565	b0427	-0.400457	-2.62977		14565	b0427	-0.325926	-2.09004		14565	b0427	-0.267763	-1.79068
14566	b0428	-0.524424	-2.70263		14566	b0428	-0.558321	-2.18005		14566	b0428	-0.351162	-1.56847
14567	b0429	-0.259177	-0.790203		14567	b0429	-0.366781	-1.07499		14567	b0429	-0.351696	-1.23373
14568	b0430	-1.06598	-3.58882		14568	b0430	-0.984006	-3.44251		14568	b0430	-0.886623	-3.66036
14569	b0431	-0.606628	-3.8108		14569	b0431	-0.578608	-3.83305		14569	b0431	-0.583533	-3.4831
14570	b0432	-0.502521	-3.2052		14570	b0432	-0.297841	-1.9077		14570	b0432	-0.331702	-2.08011
14571	b0433	-0.0878771	-0.718069		14571	b0433	-0.0184043	-0.151879		14571	b0433	0.0748937	0.606297
14572	b0434	-0.130302	-0.768114		14572	b0434	-0.142514	-0.837485		14572	b0434	-0.0527322	-0.302183
14573	b0435	0.0400836	0.231652		14573	b0435	0.0835749	0.406249		14573	b0435	0.16036	0.702815
14574	b0436	-0.0536209	-0.250304		14574	b0436	0.0208187	0.0957255		14574	b0436	0.125892	0.637751
14578	b0440	-0.367468	-1.20642		14578	b0440	-0.16358	-0.587892		14578	b0440	0.111411	0.360381
14579	b0441	-0.177129	-1.32939		14579	b0441	-0.124938	-0.971833		14579	b0441	-0.0633762	-0.470467
14580	b0442	0.18411	0.673998		14580	b0442	0.290245	1.01889		14580	b0442	0.40414	1.22466
14581	b0443	-0.114454	-0.466656		14581	b0443	-0.0505213	-0.220838		14581	b0443	0.139043	0.581505
14582	b0444	-0.127636	-0.688507		14582	b0444	-0.0368257	-0.208614		14582	b0444	0.0407691	0.221349
14583	b0445	-0.167142	-1.0667		14583	b0445	-0.0971695	-0.602037		14583	b0445	-0.0700119	-0.451686
14584	b0446	-0.102455	-0.561806		14584	b0446	-0.112084	-0.560054		14584	b0446	0.0839452	0.389693
14585	b0447	0.173161	0.725119		14585	b0447	-0.129986	-0.562175		14585	b0447	0.132698	0.555388
14586	b0448	-0.0211775	-0.122537		14586	b0448	-0.0715396	-0.399601		14586	b0448	0.0219952	0.128765
14587	b0449	-0.193739	-1.16533		14587	b0449	-0.214286	-1.29018		14587	b0449	-0.150204	-0.882263
14588	b0450	-0.132417	-0.24357		14588	b0450	-0.129646	-0.285708		14588	b0450	-0.465095	-0.849548
14589	b0451	0.0296808	0.18525		14589	b0451	0.0247695	0.170498		14589	b0451	-0.0716102	-0.430576
14590	b0452	0.14351	0.783484		14590	b0452	0.170445	0.849244		14590	b0452	0.292919	1.43965
14591	b0453	0.0404225	0.222013		14591	b0453	0.102785	0.588985		14591	b0453	0.103348	0.567125
14592	b0454	-0.274552	-1.23408		14592	b0454	-0.0952372	-0.45406		14592	b0454	-0.234236	-1.00181
14593	b0456	0.406846	0.875854		14593	b0456	0.532278	1.03735		14593	b0456	0.578855	1.65119
14594	b0457	-0.13923	-1.07321		14594	b0457	-0.0354441	-0.274595		14594	b0457	-0.0655506	-0.502172
14595	b0458	0.0404188	0.185089		14595	b0458	0.0890295	0.412418		14595	b0458	-0.0122413	-0.0555034
14596	b0459	-0.0965892	-0.694355		14596	b0459	-0.0162555	-0.115595		14596	b0459	0.0496934	0.314152
14597	b0460	-0.978877	-3.22712		14597	b0460	-0.903398	-2.91473		14597	b0460	-0.706785	-2.37944
14598	b0461	0.0665689	0.415335		14598	b0461	-0.0540654	-0.305853		14598	b0461	0.0162361	0.0871818
14599	b0462	-0.27249	-2.098		14599	b0462	-0.0992433	-0.785349		14599	b0462	-0.0465806	-0.351477
14600	b0463	-0.455809	-2.91559		14600	b0463	-0.303387	-2.15545		14600	b0463	-0.255886	-1.65528
14601	b0464	0.0590103	0.379854		14601	b0464	0.143804	0.882075		14601	b0464	0.061307	0.374961
14602	b0465	-0.0932886	-0.770139		14602	b0465	-0.0458532	-0.37639		14602	b0465	0.0257144	0.204403
14604	b0467	-0.338434	-1.33916		14604	b0467	-0.178809	-0.867953		14604	b0467	-0.227088	-1.0105
14605	b0468	-0.139044	-0.602883		14605	b0468	-0.0977508	-0.44461		14605	b0468	0.00756658	0.0344405
14606	b0469	-0.462935	-2.48428		14606	b0469	-0.445305	-2.17572		14606	b0469	-0.296925	-1.35373
14608	b0471	0.162029	0.330671		14608	b0471	0.125693	0.259118		14608	b0471	0.0450259	0.0681602
14609	b0472	0.0139166	0.0659103		14609	b0472	-0.13268	-0.732118		14609	b0472	-0.0946558	-0.47533
14610	b0473	-0.106934	-0.676886		14610	b0473	-0.00913458	-0.0612368		14610	b0473	0.0131276	0.0847636
14613	b0476	0.102619	0.519761		14613	b0476	0.0583967	0.338274		14613	b0476	0.0856019	0.444101
14614	b0477	-0.293485	-1.73485		14614	b0477	-0.254364	-1.56183		14614	b0477	-0.14241	-0.798377
14615	b0478	-0.345097	-2.08267		14615	b0478	-0.274241	-1.78178		14615	b0478	-0.175541	-1.0619
14616	b0479	-0.0268325	-0.125273		14616	b0479	-0.00166173	-0.00844394		14616	b0479	-0.0861722	-0.358153
14617	b0480	-0.0401326	-0.248673		14617	b0480	-0.122	-0.750005		14617	b0480	-0.0573676	-0.328187
14618	b0481	-0.139067	-0.518367		14618	b0481	-0.128415	-0.399716		14618	b0481	0.0170514	0.0521621
14619	b0482	0.00195726	0.011904		14619	b0482	-0.0324388	-0.16628		14619	b0482	0.00167721	0.008909
14620	b0483	-0.0369504	-0.13886		14620	b0483	-0.181059	-0.677963		14620	b0483	-0.123076	-0.401562
14621	b0484	-0.204306	-1.48844		14621	b0484	-0.206547	-1.55184		14621	b0484	0.034418	0.258681
14622	b0485	-0.209497	-1.09056		14622	b0485	-0.244876	-1.40052		14622	b0485	-0.197052	-1.07575
14623	b0486	0.030181	0.159562		14623	b0486	0.0519079	0.289836		14623	b0486	-0.0450518	-0.199394
14624	b0487	0.173358	0.856867		14624	b0487	0.0122801	0.0587495		14624	b0487	0.0822291	0.385279
14625	b0488	-0.443748	-2.49711		14625	b0488	-0.397001	-2.4785		14625	b0488	-0.477279	-2.50516
14626	b0489	0.192687	0.760451		14626	b0489	0.0297106	0.118263		14626	b0489	0.129661	0.570231
14627	b0490	-0.413689	-1.8548		14627	b0490	-0.302709	-1.35858		14627	b0490	-0.380341	-1.82392
14628	b0491	-0.325699	-1.56022		14628	b0491	-0.33407	-1.39628		14628	b0491	-0.186918	-0.902076
14629	b0492	-0.218746	-0.963555		14629	b0492	0.0503529	0.243471		14629	b0492	-0.0645104	-0.324226
14630	b0493	0.0965531	0.444721		14630	b0493	0.179016	0.818224		14630	b0493	0.0890237	0.34254
14631	b0494	0.120523	0.666923		14631	b0494	0.0851773	0.396769		14631	b0494	-0.0596498	-0.283831
14632	b0495	-0.00698935	-0.0291141		14632	b0495	-0.12181	-0.571974		14632	b0495	-0.0438451	-0.14963
14633	b0496	0.359844	2.41207		14633	b0496	0.270921	1.74312		14633	b0496	0.327307	1.9784
14634	b0497	0.0662167	0.527887		14634	b0497	0.0928208	0.736831		14634	b0497	0.109167	0.854113
14636	b0499	-0.936896	-2.25036		14636	b0499	-0.93326	-1.5508		14636	b0499	-0.845351	-1.77635
14640	b0503	0.379055	1.14007		14640	b0503	0.430375	1.96388		14640	b0503	0.225496	0.643232
14641	b0504	-0.116727	-0.253906		14641	b0504	0.0380151	0.0911507		14641	b0504	-0.193938	-0.373209
14642	b0505	-0.0182905	-0.067258		14642	b0505	-0.0749804	-0.32228		14642	b0505	-0.211275	-0.796097
14643	b0506	-0.234648	-0.944084		14643	b0506	-0.0594624	-0.225113		14643	b0506	-0.183964	-0.596237
14644	b0507	0.146703	0.82439		14644	b0507	0.106988	0.597882		14644	b0507	0.0871921	0.478361
14646	b0509	0.0106446	0.0478945		14646	b0509	0.0084851	0.0396948		14646	b0509	-0.0824897	-0.384248
14648	b0511	-0.335578	-2.35301		14648	b0511	-0.264861	-1.76665		14648	b0511	-0.266721	-1.82853
14649	b0512	0.442862	3.35904		14649	b0512	0.342958	2.4316		14649	b0512	0.34244	2.40816
14650	b0513	0.163664	1.25115		14650	b0513	0.114678	0.917139		14650	b0513	0.0923871	0.682442
14651	b0514	0.266553	1.43946		14651	b0514	0.3075	1.74676		14651	b0514	0.287149	1.68115
14652	b0515	-0.0839524	-0.544648		14652	b0515	0.00344579	0.0237801		14652	b0515	-0.0832272	-0.563173
14653	b0516	-0.116796	-0.833832		14653	b0516	-0.136604	-0.968343		14653	b0516	-0.169977	-1.20273
14654	b0517	0.130282	0.743615		14654	b0517	0.00420092	0.0262436		14654	b0517	0.0737245	0.414171
14655	b0518	0.11157	0.677914		14655	b0518	0.131911	0.809816		14655	b0518	0.068872	0.410841
14657	b0520	0.426167	1.73521		14657	b0520	0.325969	1.23452		14657	b0520	0.310901	1.05796
14658	b0521	0.103316	0.402749		14658	b0521	-0.0228436	-0.110871		14658	b0521	0.0790743	0.346663
14659	b0522	-0.453361	-1.91845		14659	b0522	-0.868117	-3.44057		14659	b0522	-0.695863	-3.00115
14660	b0523	-0.421972	-1.58714		14660	b0523	-1.09269	-3.10761		14660	b0523	-0.709884	-2.67878
14664	b0527	0.199473	0.616215		14664	b0527	-0.00293863	-0.00877395		14664	b0527	-0.148649	-0.385176
14668	b0531	-0.493275	-1.94971		14668	b0531	-0.535428	-2.05851		14668	b0531	-0.448285	-1.46866
14669	b0532	-0.296104	-2.19707		14669	b0532	-0.341191	-2.56263		14669	b0532	-0.321778	-2.37782
14670	b0533	-0.426595	-1.84845		14670	b0533	-0.488949	-1.99931		14670	b0533	-0.441946	-1.94897
14671	b0534	-0.176988	-0.783496		14671	b0534	-0.196625	-0.89709		14671	b0534	-0.273989	-1.18702
14673	b0537	0.090822	0.586129		14673	b0537	0.058618	0.385784		14673	b0537	0.0560246	0.387026
14674	b4508	0.733063	2.71104		14674	b4508	0.670326	2.44436		14674	b4508	0.909133	3.07683
14675	b0539	0.0136038	0.0561705		14675	b0539	-0.153644	-0.664927		14675	b0539	-0.0357118	-0.153149
14679	b0543	0.147264	1.02691		14679	b0543	0.136371	1.01129		14679	b0543	0.118681	0.806094
14681	b0545	-0.0313848	-0.17949		14681	b0545	-0.0483357	-0.272118		14681	b0545	-0.16495	-0.851371
14682	b0546	-0.278394	-0.756793		14682	b0546	-0.348314	-0.984087		14682	b0546	-0.469342	-1.07291
14683	b0547	0.0233521	0.073347		14683	b0547	-0.0853943	-0.263193		14683	b0547	-0.0910406	-0.310452
14684	b0548	-0.0588504	-0.171601		14684	b0548	0.211944	0.665291		14684	b0548	-0.0827026	-0.242746
14686	b0550	0.242866	0.771974		14686	b0550	-0.250107	-0.855161		14686	b0550	-0.324736	-0.85037
14687	b0551	0.0786385	0.528478		14687	b0551	0.0750487	0.51782		14687	b0551	0.0785589	0.530863
14689	b0553	0.238901	1.6583		14689	b0553	0.254722	1.74209		14689	b0553	0.172017	1.16471
14690	b0554	0.151673	1.05865		14690	b0554	0.0304314	0.196506		14690	b0554	0.0928245	0.670639
14691	b0555	-0.0121052	-0.0694346		14691	b0555	-0.00951916	-0.0533511		14691	b0555	-0.0601788	-0.349279
14692	b0556	-0.0977842	-0.271659		14692	b0556	-0.331285	-1.21279		14692	b0556	-0.453012	-1.32075
14693	b0557	0.420534	2.2772		14693	b0557	0.250932	1.0135		14693	b0557	-0.0141868	-0.0640506
14695	b0559	-0.287283	-1.46707		14695	b0559	-0.286291	-1.55321		14695	b0559	-0.360329	-1.71281
14697	b0561	0.613991	2.07858		14697	b0561	0.762347	2.64631		14697	b0561	0.452265	1.49484
14698	b0562	-0.0384265	-0.253607		14698	b0562	0.0126	0.0883652		14698	b0562	-0.00128917	-0.0088555
14699	b0563	-0.375857	-1.37773		14699	b0563	-0.462762	-1.77582		14699	b0563	-0.446592	-1.98411
14701	b0565	0.180624	1.33186		14701	b0565	0.241982	1.83073		14701	b0565	0.114946	0.827151
14702	b0566	-0.0276212	-0.15595		14702	b0566	-0.0550612	-0.294576		14702	b0566	-0.0363914	-0.212208
14703	b0567	0.0687296	0.423466		14703	b0567	0.0897817	0.582514		14703	b0567	0.0729581	0.439999
14704	b0568	0.23813	1.6791		14704	b0568	0.152751	1.10592		14704	b0568	0.061582	0.426743
14705	b0569	0.214558	1.30819		14705	b0569	0.067021	0.42423		14705	b0569	0.0493894	0.286483
14706	b0570	0.0689279	0.411113		14706	b0570	0.0870931	0.540333		14706	b0570	0.0120047	0.0710867
14707	b0571	0.2165	1.45025		14707	b0571	0.200952	1.19639		14707	b0571	0.107862	0.589379
14708	b0572	0.0393018	0.275374		14708	b0572	0.00375971	0.0273063		14708	b0572	0.018108	0.126806
14709	b0573	0.0726338	0.550441		14709	b0573	0.0221484	0.160582		14709	b0573	0.0415594	0.284116
14710	b0574	0.119993	0.641528		14710	b0574	0.190889	1.09954		14710	b0574	0.128159	0.671428
14711	b0575	0.209293	1.48369		14711	b0575	0.190243	1.29686		14711	b0575	0.101759	0.680957
14712	b0576	0.0910882	0.512432		14712	b0576	0.00172851	0.0107918		14712	b0576	0.124854	0.694434
14713	b0577	-0.00892337	-0.0764158		14713	b0577	0.0498051	0.421789		14713	b0577	-0.0195535	-0.166269
14714	b0578	-0.237364	-1.42435		14714	b0578	-0.146312	-0.975724		14714	b0578	-0.262214	-1.45838
14715	b0579	0.460317	1.12316		14715	b0579	0.401208	0.692844		14715	b0579	0.511017	0.986699
14716	b0580	-0.398256	-1.2733		14716	b0580	-0.679522	-2.00503		14716	b0580	-0.694787	-1.80116
14717	b0581	-0.00432603	-0.0272715		14717	b0581	0.0486812	0.356827		14717	b0581	0.120636	0.836904
14719	b0583	0.344138	1.00425		14719	b0583	0.409966	0.875857		14719	b0583	0.417788	1.29553
14720	b0584	-0.606812	-4.38398		14720	b0584	-0.744711	-5.29424		14720	b0584	-1.36597	-8.23111
14721	b0585	-1.12981	-4.7594		14721	b0585	-1.51446	-6.35229		14721	b0585	-1.6869	-6.7992
14722	b0586	0.212008	1.56542		14722	b0586	0.250212	1.82828		14722	b0586	0.197954	1.4536
14723	b0587	-0.236894	-1.35179		14723	b0587	-0.325893	-1.78852		14723	b0587	-0.253956	-1.26936
14724	b0588	-0.637596	-2.86296		14724	b0588	-0.773501	-3.83848		14724	b0588	-1.36223	-6.1637
14725	b0589	-0.740775	-2.96202		14725	b0589	-0.70445	-3.3636		14725	b0589	-1.65725	-6.74362
14726	b0590	-0.633978	-3.10574		14726	b0590	-0.771276	-3.97313		14726	b0590	-1.39839	-6.84708
14727	b0591	-0.0304047	-0.190496		14727	b0591	0.0427401	0.268296		14727	b0591	0.0224476	0.140731
14728	b0592	-0.801122	-3.54156		14728	b0592	-0.903331	-4.18192		14728	b0592	-1.65919	-8.16041
14729	b0593	0.178397	1.06559		14729	b0593	0.189142	1.22054		14729	b0593	0.105614	0.577283
14730	b0594	-0.105288	-0.578326		14730	b0594	0.0274609	0.17092		14730	b0594	-0.093936	-0.520607
14731	b0595	0.323079	1.53828		14731	b0595	0.179572	0.867873		14731	b0595	0.108419	0.473675
14732	b0596	0.145335	0.773026		14732	b0596	0.273842	1.28259		14732	b0596	0.0839209	0.38324
14733	b0597	-0.183625	-0.634671		14733	b0597	-0.303466	-1.50945		14733	b0597	-0.533779	-1.59746
14734	b0598	0.064956	0.515292		14734	b0598	0.0362182	0.277433		14734	b0598	0.0606151	0.474715
14736	b0599	-0.0542074	-0.34767		14736	b0599	-0.127537	-0.868745		14736	b0599	-0.0614312	-0.422657
14737	b0600	-0.00432603	-0.0247692		14737	b0600	0.0461363	0.295165		14737	b0600	-0.0594713	-0.329893
14738	b0601	0.147355	0.909296		14738	b0601	0.18669	1.15211		14738	b0601	0.139972	0.743073
14739	b0602	-0.101552	-0.470994		14739	b0602	-0.136795	-0.710544		14739	b0602	0.0888397	0.495905
14741	b0604	0.00529336	0.0214173		14741	b0604	0.0630042	0.250822		14741	b0604	0.141167	0.50557
14742	b0605	-0.488973	-0.886507		14742	b0605	-0.681753	-1.56647		14742	b0605	-0.620173	-1.58022
14743	b0606	-0.175396	-0.80475		14743	b0606	-0.215323	-0.879764		14743	b0606	-0.193823	-0.751141
14744	b0607	-0.185419	-1.17841		14744	b0607	-0.0824069	-0.566074		14744	b0607	-0.109081	-0.712814
14745	b0608	0.408487	2.2124		14745	b0608	0.273913	1.36507		14745	b0608	0.312722	1.91031
14747	b0610	0.741717	1.18884		14747	b0610	0.7812	1.56864		14747	b0610	0.756016	1.50243
14748	b0611	0.114155	0.439723		14748	b0611	0.0336894	0.134397		14748	b0611	-0.0923267	-0.307269
14749	b0612	-0.0270838	-0.135192		14749	b0612	0.0507123	0.298753		14749	b0612	-0.115038	-0.537389
14750	b0613	0.299814	0.904895		14750	b0613	0.292788	0.944126		14750	b0613	0.240457	0.72327
14752	b0615	0.00223084	0.00961119		14752	b0615	0.0641056	0.292746		14752	b0615	-0.136199	-0.50505
14753	b0616	-0.0743403	-0.234267		14753	b0616	-0.0682943	-0.306268		14753	b0616	0.0018267	0.00647271
14755	b0618	-0.269067	-1.29499		14755	b0618	-0.0771373	-0.386659		14755	b0618	-0.262788	-1.22359
14756	b0619	-1.1335	-6.22272		14756	b0619	-0.951868	-5.06093		14756	b0619	-0.997767	-4.59063
14757	b0620	0.358917	2.2489		14757	b0620	0.292335	1.92441		14757	b0620	0.332714	2.04302
14758	b0621	0.336266	2.09015		14758	b0621	0.183468	1.14896		14758	b0621	0.285331	1.80935
14759	b0622	-0.00756645	-0.0435564		14759	b0622	-0.0668249	-0.353195		14759	b0622	-0.0530101	-0.296605
14761	b0624	0.211936	0.631375		14761	b0624	0.205185	0.587831		14761	b0624	0.11059	0.387988
14766	b0629	0.130251	0.867393		14766	b0629	0.0702332	0.477612		14766	b0629	0.0460754	0.309367
14769	b0632	-0.383841	-1.88187		14769	b0632	-0.55322	-2.73219		14769	b0632	-0.414221	-2.06809
14770	b0633	0.0255387	0.137335		14770	b0633	-0.0530558	-0.301803		14770	b0633	0.0241526	0.12965
14773	b0636	0.29022	1.41326		14773	b0636	0.451648	2.51286		14773	b0636	0.380992	1.68486
14775	b0638	0.397174	2.03215		14775	b0638	0.285693	1.46506		14775	b0638	0.34595	1.66312
14778	b0641	0.388149	1.06799		14778	b0641	0.178282	0.456775		14778	b0641	-0.0438768	-0.112038
14780	b0643	-0.157973	-0.738632		14780	b0643	-0.169009	-0.909479		14780	b0643	-0.189871	-0.764145
14781	b0644	-0.0233842	-0.127682		14781	b0644	-0.0997627	-0.548595		14781	b0644	0.0560855	0.315287
14782	b0645	-0.267922	-0.894686		14782	b0645	-0.302893	-1.28236		14782	b0645	-0.26853	-0.994006
14783	b0646	-0.00594133	-0.0435176		14783	b0646	0.000892028	0.00666058		14783	b0646	0.008952	0.0664389
14784	b0647	-0.297707	-1.00809		14784	b0647	-0.406934	-1.32784		14784	b0647	-0.456444	-1.44399
14785	b0648	-0.475986	-1.88812		14785	b0648	-0.632459	-2.5222		14785	b0648	-0.419667	-1.53983
14786	b0649	-0.00988215	-0.0464245		14786	b0649	0.0205967	0.0981241		14786	b0649	-0.0530815	-0.24808
14787	b0650	-0.0546571	-0.359122		14787	b0650	-0.215695	-1.41159		14787	b0650	-0.110276	-0.686396
14788	b0651	-0.0509408	-0.320086		14788	b0651	-0.107423	-0.69374		14788	b0651	-0.0909352	-0.568679
14789	b0652	0.0667387	0.221023		14789	b0652	0.00414106	0.0151611		14789	b0652	-0.164939	-0.570821
14790	b0653	0.0849562	0.441134		14790	b0653	0.0694066	0.34045		14790	b0653	0.117618	0.569739
14791	b0654	-0.113438	-0.631958		14791	b0654	-0.139511	-0.632678		14791	b0654	-0.183338	-0.89286
14792	b0655	-0.129551	-0.481734		14792	b0655	-0.018703	-0.0562847		14792	b0655	-0.111663	-0.341117
14797	b0660	-0.663027	-2.66654		14797	b0660	-0.548186	-2.26278		14797	b0660	-0.564308	-2.0996
14798	b0661	0.026352	0.155998		14798	b0661	0.0489648	0.295723		14798	b0661	0.0376855	0.212899
14804	b0674	-0.146733	-0.815997		14804	b0674	-0.227487	-1.48496		14804	b0674	-0.49038	-2.74453
14805	b0675	0.402735	1.7446		14805	b0675	0.373912	1.53634		14805	b0675	0.276034	1.08349
14806	b0676	-0.457841	-2.08217		14806	b0676	-0.498396	-2.3327		14806	b0676	-0.699721	-3.61965
14807	b0677	-0.510439	-1.36817		14807	b0677	-0.639973	-2.08544		14807	b0677	-0.611821	-1.60018
14808	b0678	-0.277414	-0.68565		14808	b0678	-0.121267	-0.48464		14808	b0678	-0.266329	-0.779488
14809	b0679	-0.107017	-0.726364		14809	b0679	0.0649186	0.461622		14809	b0679	-0.0760696	-0.505886
14811	b0681	-0.227601	-1.30226		14811	b0681	-0.343826	-2.05294		14811	b0681	-0.242603	-1.3645
14812	b0682	-0.00907468	-0.0306514		14812	b0682	-0.0127132	-0.0479567		14812	b0682	-0.0487499	-0.147432
14815	b0685	-0.0251751	-0.0839859		14815	b0685	0.308254	1.01362		14815	b0685	0.0992753	0.312951
14816	b0686	0.365495	1.35577		14816	b0686	0.401062	1.60935		14816	b0686	0.363387	1.31624
14819	b0689	0.217326	1.29486		14819	b0689	0.278001	1.66737		14819	b0689	0.215111	1.35881
14821	b0691	-0.285834	-1.64707		14821	b0691	-0.307807	-1.66337		14821	b0691	-0.27193	-1.33025
14823	b0692	0.615812	3.88377		14823	b0692	0.426194	2.49631		14823	b0692	0.619251	3.33753
14824	b0693	-0.230812	-1.40198		14824	b0693	-0.310219	-1.84455		14824	b0693	-0.355885	-2.0521
14826	b0694	0.511236	2.22759		14826	b0694	0.353396	1.45253		14826	b0694	0.354794	1.44085
14827	b0695	0.251837	1.55874		14827	b0695	0.341736	2.18052		14827	b0695	0.212167	1.35852
14828	b0696	-0.471429	-1.88897		14828	b0696	-0.460484	-1.39203		14828	b0696	-0.650602	-2.83683
14829	b0697	0.0555654	0.337583		14829	b0697	0.0222269	0.151458		14829	b0697	-0.00830032	-0.0512936
14830	b0698	0.145803	0.739411		14830	b0698	0.151517	0.865224		14830	b0698	0.20869	1.01605
14833	b0700	0.111727	0.557946		14833	b0700	0.176236	0.965725		14833	b0700	0.112566	0.589172
14835	b0703	-0.000468692	-0.00332945		14835	b0703	0.0388566	0.279406		14835	b0703	0.0235244	0.164074
14839	b0707	0.191253	0.559594		14839	b0707	0.204881	0.568613		14839	b0707	0.330297	0.913705
14840	b0708	-0.046879	-0.204062		14840	b0708	-0.12562	-0.578528		14840	b0708	-0.102562	-0.445016
14841	b0709	0.059424	0.436805		14841	b0709	0.192561	1.38923		14841	b0709	0.148684	1.05786
14842	b0710	-0.16118	-0.445782		14842	b0710	0.0310026	0.10606		14842	b0710	-0.13272	-0.378258
14843	b0711	0.340829	1.4728		14843	b0711	0.490352	2.49847		14843	b0711	0.534103	2.37014
14844	b0712	-0.173507	-0.82564		14844	b0712	-0.283002	-1.12364		14844	b0712	-0.238777	-1.08141
14845	b0713	0.112319	0.43176		14845	b0713	0.256116	1.03303		14845	b0713	0.223604	0.708599
14846	b0714	-0.229721	-0.967853		14846	b0714	0.0456772	0.219252		14846	b0714	-0.0788117	-0.269117
14847	b0715	0.209913	0.840371		14847	b0715	0.195988	0.786288		14847	b0715	0.201755	0.767629
14848	b0716	0.0145134	0.101291		14848	b0716	0.124896	0.841659		14848	b0716	0.0574368	0.370795
14849	b0717	0.0915522	0.360836		14849	b0717	0.0580131	0.22373		14849	b0717	0.00107595	0.0039145
14850	b0718	-0.133272	-0.954449		14850	b0718	-0.054017	-0.418451		14850	b0718	-0.0596198	-0.432268
14851	b0719	0.0829409	0.559896		14851	b0719	0.0486464	0.317455		14851	b0719	0.0697451	0.456667
14852	b0720	-0.346749	-1.31778		14852	b0720	-0.367376	-1.61869		14852	b0720	-0.688123	-2.64672
14853	b0721	-0.405543	-1.3106		14853	b0721	-0.27924	-0.906692		14853	b0721	-0.693483	-2.37741
14855	b0723	-0.55452	-3.02149		14855	b0723	-0.650312	-3.72702		14855	b0723	-0.603021	-3.35633
14856	b0724	-0.415233	-1.65927		14856	b0724	-0.332227	-1.4294		14856	b0724	-0.637694	-2.41865
14860	b0728	-0.287209	-1.13045		14860	b0728	-0.190919	-0.777049		14860	b0728	-0.175473	-0.726285
14861	b0729	-0.827522	-2.28327		14861	b0729	-0.751665	-2.27191		14861	b0729	-0.675725	-1.6052
14863	b0731	0.134277	0.728571		14863	b0731	0.116905	0.680852		14863	b0731	0.0250523	0.136122
14864	b0732	0.189899	1.57467		14864	b0732	0.176393	1.42238		14864	b0732	0.208978	1.70306
14867	b0735	0.605341	3.14871		14867	b0735	0.615396	3.23692		14867	b0735	0.649993	2.83596
14868	b0736	0.124517	0.353028		14868	b0736	0.238095	0.785567		14868	b0736	0.383448	1.03996
14874	b0742	0.0566973	0.315373		14874	b0742	0.120533	0.642563		14874	b0742	0.0973897	0.518448
14875	b0750	0.0641207	0.310802		14875	b0750	-0.00424034	-0.021009		14875	b0750	-0.0450835	-0.225254
14876	b0751	0.264964	1.30763		14876	b0751	0.0536739	0.251427		14876	b0751	-0.00292684	-0.0135173
14877	b0752	-0.136615	-0.685289		14877	b0752	-0.137846	-0.678775		14877	b0752	-0.142883	-0.619747
14878	b0753	-0.225471	-0.725558		14878	b0753	-0.282946	-1.10809		14878	b0753	-0.197124	-0.697651
14879	b0754	0.0371412	0.188462		14879	b0754	-0.218506	-1.045		14879	b0754	0.0185257	0.085551
14880	b0755	-0.237539	-1.0825		14880	b0755	-0.0634529	-0.334541		14880	b0755	-0.277968	-1.34721
14881	b0756	0.041709	0.224844		14881	b0756	-0.180509	-0.956791		14881	b0756	0.0693684	0.26309
14882	b0757	0.449758	2.37433		14882	b0757	0.326078	1.72982		14882	b0757	0.421497	2.04919
14883	b0758	-1.64125	-3.13767		14883	b0758	-1.66607	-2.86107		14883	b0758	-1.67962	-2.21042
14884	b0759	-1.7211	-7.4712		14884	b0759	-1.99049	-8.17119		14884	b0759	-1.91769	-6.61733
14885	b0760	-0.0807838	-0.41096		14885	b0760	-0.166741	-1.02219		14885	b0760	-0.0557763	-0.304946
14886	b0761	0.0105532	0.0458805		14886	b0761	0.0819729	0.411538		14886	b0761	0.129552	0.551771
14888	b0763	-0.187219	-0.906828		14888	b0763	-0.156996	-0.779515		14888	b0763	-0.181804	-0.739552
14889	b0764	-0.321415	-1.15921		14889	b0764	-0.290227	-1.19986		14889	b0764	-0.157213	-0.552407
14890	b0765	0.166643	0.670882		14890	b0765	0.090187	0.373497		14890	b0765	0.243298	0.907579
14891	b0766	-0.0117981	-0.0665299		14891	b0766	0.00344083	0.0210099		14891	b0766	-0.063572	-0.298126
14893	b0768	-0.105638	-0.44338		14893	b0768	-0.082871	-0.355869		14893	b0768	-0.07358	-0.342541
14894	b0769	-0.0629331	-0.326719		14894	b0769	-0.246741	-1.30751		14894	b0769	-0.0722573	-0.380697
14895	b0770	0.0841344	0.617267		14895	b0770	0.0131667	0.0962369		14895	b0770	-0.00292684	-0.0216208
14896	b0771	0.0137387	0.104541		14896	b0771	0.0172439	0.13363		14896	b0771	0.0922385	0.696244
14897	b0772	0.225479	1.42241		14897	b0772	0.0899001	0.619899		14897	b0772	0.233778	1.4865
14898	b0773	0.56078	2.39448		14898	b0773	0.360745	1.52405		14898	b0773	0.590541	2.41367
14899	b0774	-0.0573399	-0.224071		14899	b0774	-0.0131899	-0.0503209		14899	b0774	0.186333	0.587211
14900	b0775	-0.0529804	-0.216023		14900	b0775	0.00993298	0.0363553		14900	b0775	0.162229	0.637865
14901	b0776	0.286049	1.84307		14901	b0776	0.377583	2.49547		14901	b0776	0.326604	1.95646
14902	b0777	0.1135	0.475388		14902	b0777	0.10376	0.444953		14902	b0777	0.107004	0.383865
14903	b0778	-0.0510512	-0.163187		14903	b0778	0.188233	0.653208		14903	b0778	0.0344137	0.0986026
14904	b0779	-0.00432603	-0.0268753		14904	b0779	0.00617587	0.0363515		14904	b0779	0.0971419	0.645253
14905	b0780	0.183861	0.766501		14905	b0780	0.266715	1.19948		14905	b0780	0.208289	1.0812
14906	b0781	0.241194	1.00403		14906	b0781	0.141109	0.690728		14906	b0781	0.259751	1.10105
14908	b0783	-0.0958186	-0.313014		14908	b0783	0.0394888	0.148226		14908	b0783	-0.0201471	-0.0666911
14909	b0784	0.252091	0.629031		14909	b0784	0.0727903	0.146293		14909	b0784	0.214026	0.509006
14910	b0785	0.290984	0.945352		14910	b0785	0.350596	1.12941		14910	b0785	0.32592	1.19005
14911	b0786	-0.014396	-0.0984728		14911	b0786	0.0319527	0.240415		14911	b0786	-0.0374941	-0.250522
14913	b0788	0.0108081	0.0356455		14913	b0788	-0.193756	-0.766363		14913	b0788	-0.0593361	-0.219269
14914	b0789	0.0625165	0.215787		14914	b0789	0.020169	0.0801785		14914	b0789	-0.196881	-0.616875
14915	b0790	-0.072994	-0.308296		14915	b0790	-0.0201473	-0.0813176		14915	b0790	-0.0363631	-0.133948
14916	b0791	-0.357466	-0.982967		14916	b0791	-0.143195	-0.341655		14916	b0791	0.0626459	0.160598
14917	b0792	0.16468	0.581769		14917	b0792	0.0933962	0.452772		14917	b0792	0.396695	1.66808
14918	b0793	-0.211734	-1.09835		14918	b0793	-0.0979887	-0.437353		14918	b0793	0.00658153	0.037045
14919	b0794	-0.0622612	-0.2674		14919	b0794	0.0356222	0.162745		14919	b0794	0.0289585	0.126298
14920	b0795	0.0304557	0.178266		14920	b0795	0.0132933	0.0758417		14920	b0795	-0.00738961	-0.0385019
14921	b0796	-0.0684655	-0.258816		14921	b0796	-0.0357809	-0.148773		14921	b0796	0.0723859	0.213764
14922	b0797	-0.179556	-0.804568		14922	b0797	-0.118064	-0.564619		14922	b0797	-0.122418	-0.521272
14924	b0799	0.0654647	0.305783		14924	b0799	0.107872	0.576707		14924	b0799	0.237522	1.26787
14925	b0800	0.094879	0.421633		14925	b0800	0.123305	0.539798		14925	b0800	0.225017	0.842557
14926	b0801	0.143754	0.720658		14926	b0801	0.137368	0.726839		14926	b0801	0.169169	0.845985
14927	b0802	0.135568	0.414852		14927	b0802	-0.079092	-0.167089		14927	b0802	-0.085661	-0.167994
14928	b0803	-0.252998	-0.965403		14928	b0803	-0.270409	-1.0825		14928	b0803	-0.258589	-1.01731
14929	b0804	-0.0240879	-0.11247		14929	b0804	0.0895087	0.406039		14929	b0804	0.076418	0.326781
14930	b0805	-0.0375587	-0.229494		14930	b0805	0.101427	0.654873		14930	b0805	0.0956274	0.621745
14931	b0806	-0.0259746	-0.0720358		14931	b0806	-0.0338227	-0.0817714		14931	b0806	0.356955	0.77272
14932	b0807	-0.157637	-0.848258		14932	b0807	-0.0933695	-0.505499		14932	b0807	-0.105235	-0.552955
14933	b0808	-0.106967	-0.647518		14933	b0808	-0.00305713	-0.0196202		14933	b0808	-0.13602	-0.676389
14934	b0809	-0.174862	-0.690253		14934	b0809	-0.0456927	-0.216119		14934	b0809	-0.0094358	-0.0336148
14935	b0810	-0.24919	-0.885726		14935	b0810	-0.145161	-0.595317		14935	b0810	0.0107548	0.0428962
14936	b0811	0.246214	1.28557		14936	b0811	0.289909	1.6838		14936	b0811	0.371553	2.04609
14937	b0812	-0.139776	-0.690338		14937	b0812	-0.107372	-0.509149		14937	b0812	-0.104896	-0.494199
14938	b0813	0.286598	1.88422		14938	b0813	0.27694	2.00424		14938	b0813	0.320153	2.14592
14939	b0814	-0.508841	-2.09515		14939	b0814	-0.571175	-1.91179		14939	b0814	-0.469187	-1.46435
14940	b0815	-0.140223	-0.650008		14940	b0815	-0.0432861	-0.236243		14940	b0815	-0.0386846	-0.18794
14942	b0817	0.0092433	0.035254		14942	b0817	0.240058	0.933714		14942	b0817	0.195617	0.707727
14943	b0818	0.000949119	0.00601239		14943	b0818	-0.0407802	-0.2577		14943	b0818	0.098834	0.645718
14944	b0819	0.153987	0.737428		14944	b0819	0.053905	0.254025		14944	b0819	0.128738	0.632981
14945	b0820	-0.119233	-0.73405		14945	b0820	0.040144	0.250154		14945	b0820	-0.0853912	-0.457537
14946	b0821	-0.44572	-2.5612		14946	b0821	-0.124263	-0.704595		14946	b0821	-0.326939	-1.60091
14947	b0822	-0.404452	-1.30552		14947	b0822	-0.28085	-0.880027		14947	b0822	-0.383389	-1.138
14948	b0823	-0.0499229	-0.313276		14948	b0823	-0.0275565	-0.177078		14948	b0823	-0.0273118	-0.174204
14949	b0824	0.043794	0.254953		14949	b0824	0.207323	1.27108		14949	b0824	0.143264	0.747426
14950	b0825	0.418205	2.0008		14950	b0825	0.451709	2.29426		14950	b0825	0.547095	2.59686
14951	b0826	-0.254078	-1.34235		14951	b0826	-0.170652	-0.951585		14951	b0826	-0.259518	-1.41956
14952	b0827	-0.347562	-1.37544		14952	b0827	-0.352705	-1.32793		14952	b0827	-0.32221	-1.18616
14953	b0828	0.304748	1.0159		14953	b0828	0.251657	0.631522		14953	b0828	0.381858	0.897154
14954	b0829	-0.212502	-1.04398		14954	b0829	-0.0933513	-0.484248		14954	b0829	-0.153156	-0.717533
14955	b0830	-0.259094	-1.58962		14955	b0830	-0.111515	-0.688407		14955	b0830	-0.1288	-0.751096
14956	b0831	0.282247	1.14044		14956	b0831	0.0550053	0.21948		14956	b0831	0.23914	0.804889
14957	b0832	0.251658	1.62122		14957	b0832	0.192687	1.14887		14957	b0832	0.287357	1.77042
14958	b0833	-0.122752	-0.786854		14958	b0833	-0.0445372	-0.305713		14958	b0833	-0.0845603	-0.5368
14959	b0834	-0.0605942	-0.290297		14959	b0834	-0.0874008	-0.388472		14959	b0834	-0.0681636	-0.3268
14960	b0835	-0.3536	-1.74887		14960	b0835	-0.449811	-2.29098		14960	b0835	-0.26689	-1.36748
14962	b0837	0.109689	0.327448		14962	b0837	0.189954	0.605152		14962	b0837	0.0599913	0.195147
14963	b0838	-0.154106	-0.921203		14963	b0838	-0.132907	-0.768291		14963	b0838	-0.212961	-1.09026
14964	b0839	-0.0767314	-0.416034		14964	b0839	0.0427423	0.259293		14964	b0839	0.0536506	0.327276
14965	b0840	-0.29461	-0.910865		14965	b0840	-0.526457	-1.71948		14965	b0840	-0.362059	-1.26942
14966	b0841	0.276672	0.792324		14966	b0841	0.211955	0.613116		14966	b0841	0.363483	0.987568
14967	b0842	0.168869	1.06538		14967	b0842	0.121522	0.792881		14967	b0842	0.238694	1.45791
14968	b0843	-0.0232457	-0.0348372		14968	b0843	-0.280131	-0.545562		14968	b0843	0.164376	0.373488
14969	b0844	0.239029	0.92656		14969	b0844	0.0317139	0.120732		14969	b0844	0.229291	0.892442
14970	b0845	0.111631	0.568349		14970	b0845	0.0408534	0.218654		14970	b0845	0.115315	0.579378
14971	b0846	-0.42286	-1.97537		14971	b0846	-0.296579	-1.40479		14971	b0846	-0.43169	-2.10138
14972	b0847	0.0300582	0.189579		14972	b0847	0.000892028	0.00522334		14972	b0847	-0.00292684	-0.016982
14973	b0848	-0.418522	-1.97686		14973	b0848	-0.301104	-1.47935		14973	b0848	-0.335622	-1.49219
14975	b0850	-0.431722	-0.954624		14975	b0850	-0.329402	-0.622734		14975	b0850	-0.518249	-0.759714
14976	b0851	0.585496	1.77195		14976	b0851	0.714256	2.67778		14976	b0851	0.742121	2.63479
14977	b0852	-0.155491	-0.770528		14977	b0852	-0.0988132	-0.501171		14977	b0852	-0.14353	-0.560735
14978	b0853	-0.45731	-1.31493		14978	b0853	-0.10738	-0.28016		14978	b0853	-0.125041	-0.331116
14979	b0854	0.0847042	0.443407		14979	b0854	-0.0726478	-0.315486		14979	b0854	0.10259	0.474972
14980	b0855	0.0675572	0.346445		14980	b0855	0.114059	0.615895		14980	b0855	-0.0296317	-0.155
14981	b0856	-0.509957	-1.62694		14981	b0856	-0.576751	-1.75644		14981	b0856	-0.479082	-1.38129
14982	b0857	-0.147579	-0.575201		14982	b0857	-0.330261	-1.11823		14982	b0857	-0.359701	-1.16843
14984	b0859	-0.103556	-0.618408		14984	b0859	-0.103675	-0.589239		14984	b0859	0.0173109	0.107296
14985	b0860	-0.0310427	-0.129834		14985	b0860	0.101246	0.557482		14985	b0860	-0.0857113	-0.391046
14986	b0861	-0.16977	-0.859935		14986	b0861	-0.0475114	-0.261822		14986	b0861	-0.00105497	-0.00481316
14987	b0862	-0.181734	-0.353819		14987	b0862	-0.0132689	-0.0325549		14987	b0862	0.105638	0.202417
14988	b0863	-0.0227418	-0.0946353		14988	b0863	0.10337	0.537562		14988	b0863	0.171538	0.729878
14989	b0864	0.635424	2.13379		14989	b0864	0.556291	1.97453		14989	b0864	0.693313	2.26379
14990	b0865	-0.104979	-0.2958		14990	b0865	0.205652	0.685807		14990	b0865	0.0471615	0.126179
14992	b0867	0.126618	0.714153		14992	b0867	0.218588	1.18716		14992	b0867	0.198989	1.17989
14993	b0868	0.207776	1.03661		14993	b0868	0.26171	1.41057		14993	b0868	0.191019	1.02007
14994	b0869	-0.202858	-0.817087		14994	b0869	0.0831232	0.409847		14994	b0869	-0.0840576	-0.371075
14995	b0870	-0.0978736	-0.522554		14995	b0870	-0.0393263	-0.186603		14995	b0870	-0.0371534	-0.172219
14996	b0871	-0.185082	-1.0425		14996	b0871	-0.0600716	-0.372913		14996	b0871	-0.0845568	-0.51494
14997	b0872	0.38166	0.983575		14997	b0872	0.415128	0.838745		14997	b0872	0.575085	1.34462
14998	b0873	0.046986	0.315638		14998	b0873	0.0795424	0.52092		14998	b0873	0.133332	0.86459
14999	b0874	-0.095593	-0.506553		14999	b0874	-0.0953806	-0.588119		14999	b0874	-0.135184	-0.740495
15000	b0875	-0.0225824	-0.100426		15000	b0875	-0.0183007	-0.0872185		15000	b0875	-0.0273748	-0.119482
15001	b0876	-0.308073	-1.22436		15001	b0876	-0.376043	-1.60473		15001	b0876	-0.286125	-1.14099
15002	b0877	0.0443193	0.232518		15002	b0877	-0.0491396	-0.259843		15002	b0877	0.0224184	0.117283
15003	b0878	0.192897	0.81336		15003	b0878	0.0858801	0.384591		15003	b0878	0.176625	0.711642
15004	b0879	-0.0829976	-0.444992		15004	b0879	-0.0218261	-0.117866		15004	b0879	0.0654286	0.381644
15007	b0882	-0.664444	-3.40869		15007	b0882	-0.237435	-1.23598		15007	b0882	-0.398043	-1.83877
15009	b0885	0.0555985	0.176229		15009	b0885	0.11782	0.396543		15009	b0885	-0.0972299	-0.254602
15016	b0892	0.150179	1.01531		15016	b0892	0.157533	0.975382		15016	b0892	0.255292	1.62194
15018	b0894	-0.0087362	-0.0542091		15018	b0894	0.0590645	0.410615		15018	b0894	1.27843e-05	8.20394e-05
15019	b0895	-0.0918019	-0.425184		15019	b0895	0.0211549	0.104844		15019	b0895	0.0703749	0.29256
15020	b0896	0.224697	1.16088		15020	b0896	0.143249	0.860836		15020	b0896	0.197409	0.927616
15021	b0897	-0.384765	-1.63634		15021	b0897	-0.280348	-1.17318		15021	b0897	-0.336291	-1.55346
15022	b0898	0.356314	2.28386		15022	b0898	0.268458	1.71228		15022	b0898	0.291698	1.83359
15023	b0899	-0.248766	-1.74564		15023	b0899	-0.218643	-1.55916		15023	b0899	-0.266681	-1.79584
15024	b0900	0.019767	0.121546		15024	b0900	0.00736514	0.0442407		15024	b0900	0.0335521	0.211777
15025	b0901	-0.127045	-0.907719		15025	b0901	-0.109015	-0.741739		15025	b0901	-0.143384	-0.971258
15026	b0902	-0.159919	-0.633562		15026	b0902	-0.380799	-1.44244		15026	b0902	-0.114764	-0.42901
15027	b0903	0.091524	0.655159		15027	b0903	-0.00348667	-0.0245558		15027	b0903	0.0787703	0.555092
15028	b0904	0.225329	0.914624		15028	b0904	0.284216	1.47956		15028	b0904	0.0918771	0.399814
15029	b0905	0.00224371	0.0150633		15029	b0905	-0.0252485	-0.170034		15029	b0905	-0.0277747	-0.184137
15030	b0906	0.0640571	0.323573		15030	b0906	0.137694	0.78126		15030	b0906	0.21987	1.25888
15031	b0907	-0.64805	-2.9398		15031	b0907	-0.845933	-4.05619		15031	b0907	-1.24195	-5.77881
15032	b0908	-1.23104	-3.34232		15032	b0908	-1.06723	-2.77445		15032	b0908	-1.4823	-3.41889
15033	b0909	0.165735	0.789379		15033	b0909	0.343566	1.59327		15033	b0909	0.196491	0.823546
15037	b0913	0.09729	0.721168		15037	b0913	0.11645	0.888861		15037	b0913	0.127711	0.902146
15040	b0916	0.0558618	0.276282		15040	b0916	0.0391367	0.201536		15040	b0916	0.0380509	0.182882
15043	b0919	0.087458	0.486018		15043	b0919	-0.00698692	-0.0383095		15043	b0919	0.126061	0.630412
15044	b0920	-0.0196419	-0.100525		15044	b0920	-0.424708	-2.25403		15044	b0920	-0.384772	-2.11064
15045	b0921	0.000681499	0.0029568		15045	b0921	-0.0636596	-0.2946		15045	b0921	-0.000405563	-0.00167705
15049	b0925	-0.101148	-0.537942		15049	b0925	-0.130196	-0.736576		15049	b0925	-0.21598	-1.10915
15050	b0926	0.174746	0.748073		15050	b0926	0.196604	0.951963		15050	b0926	-0.048116	-0.21438
15051	b0927	-0.225416	-0.623435		15051	b0927	-0.433826	-1.37004		15051	b0927	-0.648876	-1.84785
15052	b0928	-0.706078	-2.9424		15052	b0928	-0.665423	-2.85722		15052	b0928	-0.649588	-2.8057
15053	b0929	-0.36013	-1.79655		15053	b0929	-0.188807	-0.967898		15053	b0929	-0.24186	-0.950646
15055	b0931	0.134815	0.4048		15055	b0931	0.0445696	0.126443		15055	b0931	0.170336	0.500535
15056	b0932	-0.154076	-0.963464		15056	b0932	-0.244297	-1.6229		15056	b0932	-0.139878	-0.855466
15057	b0933	0.0860966	0.288944		15057	b0933	0.0023568	0.00775025		15057	b0933	-0.0759075	-0.217293
15058	b0934	0.016779	0.0535824		15058	b0934	0.238105	0.774214		15058	b0934	-0.0929018	-0.288961
15059	b0935	-0.0580163	-0.264695		15059	b0935	-0.0696007	-0.337146		15059	b0935	-0.0733369	-0.338987
15060	b0936	0.105962	0.484517		15060	b0936	0.107224	0.609274		15060	b0936	0.32274	1.72013
15062	b0938	0.163572	0.598008		15062	b0938	-0.166948	-0.549122		15062	b0938	0.0975204	0.364112
15063	b0939	-0.35121	-2.08105		15063	b0939	-0.261616	-1.62539		15063	b0939	-0.265335	-1.50135
15064	b0940	0.0452068	0.30251		15064	b0940	0.00622362	0.045041		15064	b0940	0.0402754	0.284457
15065	b0941	0.232858	1.43813		15065	b0941	0.052592	0.328817		15065	b0941	0.154696	0.935882
15066	b0942	0.114142	0.428138		15066	b0942	-0.0689921	-0.258601		15066	b0942	0.0119261	0.0458887
15067	b0943	0.0203684	0.0767988		15067	b0943	-0.00454751	-0.0161531		15067	b0943	-0.128764	-0.386044
15068	b0944	0.00794785	0.0338007		15068	b0944	-0.0622565	-0.279786		15068	b0944	0.0615908	0.231045
15069	b0945	-0.204598	-0.887671		15069	b0945	-0.326017	-1.43939		15069	b0945	-0.314719	-1.41905
15070	b0946	-0.0385147	-0.114295		15070	b0946	0.0213371	0.0812383		15070	b0946	-0.383096	-1.16114
15071	b0947	0.0349645	0.156901		15071	b0947	-0.0953241	-0.435645		15071	b0947	-0.064563	-0.254107
15072	b0948	0.0944298	0.594956		15072	b0948	0.000892028	0.0053455		15072	b0948	-0.0161711	-0.0873626
15073	b0949	-0.129927	-0.641802		15073	b0949	-0.200257	-0.96128		15073	b0949	-0.110165	-0.536426
15074	b0950	0.339359	1.69156		15074	b0950	0.251205	1.20749		15074	b0950	0.184072	0.831118
15075	b0951	0.126077	0.898437		15075	b0951	-0.0429749	-0.28316		15075	b0951	0.0370512	0.260507
15076	b0952	0.162641	0.815617		15076	b0952	0.176174	0.780049		15076	b0952	0.0969742	0.51873
15077	b0953	-0.0914993	-0.253683		15077	b0953	-0.368581	-0.912507		15077	b0953	-0.157837	-0.393154
15079	b0955	0.144746	0.91027		15079	b0955	0.221806	1.35255		15079	b0955	0.179832	1.08165
15082	b0958	0.190815	0.741275		15082	b0958	0.249868	1.53434		15082	b0958	0.318151	1.34498
15083	b0959	0.0881568	0.435758		15083	b0959	0.14137	0.67311		15083	b0959	0.239805	1.18032
15084	b0960	0.206031	1.45875		15084	b0960	0.220794	1.60081		15084	b0960	0.173204	1.20722
15085	b0961	0.187373	0.585722		15085	b0961	0.279175	0.959937		15085	b0961	0.234521	0.77725
15086	b0962	-0.0313088	-0.139599		15086	b0962	-0.160462	-0.6339		15086	b0962	-0.150991	-0.605124
15087	b0963	0.196025	1.24287		15087	b0963	0.1483	0.850947		15087	b0963	0.139138	0.781101
15088	b0964	-0.164737	-0.55337		15088	b0964	0.0251925	0.0857598		15088	b0964	-0.176334	-0.587531
15089	b0965	0.262508	0.360708		15089	b0965	-0.0796977	-0.109261		15089	b0965	-0.0615306	-0.112577
15090	b0966	0.0955915	0.400823		15090	b0966	0.0604157	0.270695		15090	b0966	0.226398	1.30986
15091	b0967	0.243712	1.19931		15091	b0967	0.348765	1.80709		15091	b0967	0.203454	0.943928
15092	b0968	-0.095048	-0.228302		15092	b0968	0.178477	0.537139		15092	b0968	0.126519	0.311531
15094	b0970	-0.199175	-0.60777		15094	b0970	0.161327	0.511587		15094	b0970	-0.135982	-0.345141
15095	b0972	0.10734	0.521296		15095	b0972	0.209766	0.977482		15095	b0972	0.176147	0.781983
15096	b0973	-0.00432603	-0.0207485		15096	b0973	0.000531338	0.00270861		15096	b0973	0.0569725	0.28491
15097	b0974	0.295923	1.25359		15097	b0974	0.310976	1.06397		15097	b0974	0.216736	0.919245
15098	b0975	0.090609	0.385592		15098	b0975	-0.128561	-0.704211		15098	b0975	-0.0719782	-0.324958
15099	b0976	0.248725	0.71789		15099	b0976	0.393448	1.26807		15099	b0976	0.297031	0.882688
15100	b0977	0.289027	0.791064		15100	b0977	0.325279	0.822022		15100	b0977	0.344361	1.01723
15101	b0978	-0.0119561	-0.0643903		15101	b0978	-0.0213586	-0.114021		15101	b0978	0.13129	0.765568
15102	b0979	-0.0672724	-0.309386		15102	b0979	0.0818736	0.348227		15102	b0979	0.0519475	0.166825
15104	b0980	0.284384	1.66653		15104	b0980	0.238889	1.41541		15104	b0980	0.260118	1.44318
15105	b0981	-0.124481	-0.698676		15105	b0981	-0.113336	-0.666917		15105	b0981	-0.0356889	-0.212345
15106	b0982	0.379699	1.86229		15106	b0982	0.38071	2.09427		15106	b0982	0.383513	1.96487
15107	b0983	-0.066457	-0.324316		15107	b0983	-0.190531	-0.961253		15107	b0983	-0.019175	-0.0893573
15108	b0984	0.0686552	0.476541		15108	b0984	0.0942143	0.631107		15108	b0984	0.0522198	0.36009
15109	b0985	0.171423	0.924857		15109	b0985	0.124304	0.715644		15109	b0985	0.0839813	0.376314
15110	b0986	0.145379	0.972803		15110	b0986	-0.0157364	-0.0989492		15110	b0986	0.116192	0.758946
15111	b0987	0.207136	0.866005		15111	b0987	0.0632041	0.259416		15111	b0987	0.21633	0.848725
15115	b0991	-0.468832	-1.71357		15115	b0991	-0.519195	-1.93666		15115	b0991	-0.335335	-1.43336
15116	b0992	0.48081	2.28995		15116	b0992	0.425386	2.36586		15116	b0992	0.291775	1.29484
15117	b0993	0.237844	1.51643		15117	b0993	0.212872	1.36332		15117	b0993	0.18282	1.18791
15118	b0994	-0.311589	-1.8857		15118	b0994	-0.2422	-1.49377		15118	b0994	-0.248851	-1.5374
15119	b0995	-0.327072	-1.25865		15119	b0995	-0.0891417	-0.369065		15119	b0995	-0.274727	-0.939099
15120	b0996	0.107196	0.618333		15120	b0996	0.12114	0.758341		15120	b0996	0.179146	1.06845
15121	b0997	0.184318	1.04033		15121	b0997	0.0744891	0.420635		15121	b0997	0.162023	0.920125
15123	b0999	0.144834	0.602851		15123	b0999	0.00844185	0.0340132		15123	b0999	-0.0406901	-0.181397
15124	b1000	-0.0400984	-0.131888		15124	b1000	0.104848	0.404209		15124	b1000	-0.0513986	-0.173926
15126	b1002	0.104048	0.555736		15126	b1002	0.102305	0.593978		15126	b1002	0.0883588	0.4505
15128	b1004	-0.0115133	-0.0415282		15128	b1004	-0.0760447	-0.323497		15128	b1004	-0.201503	-0.735832
15130	b1006	0.101848	0.318096		15130	b1006	0.117683	0.455982		15130	b1006	0.275329	0.966151
15132	b1008	0.159191	0.417827		15132	b1008	0.132555	0.337262		15132	b1008	0.124313	0.363824
15133	b1009	0.388283	1.23185		15133	b1009	0.285574	0.943073		15133	b1009	0.198521	0.621157
15134	b1010	-0.0355902	-0.136916		15134	b1010	0.000892028	0.00335686		15134	b1010	-0.112574	-0.370673
15135	b1011	-0.0290883	-0.123919		15135	b1011	0.196788	0.698078		15135	b1011	0.0657143	0.265408
15136	b1012	0.71183	3.00092		15136	b1012	0.614408	2.8351		15136	b1012	0.767515	3.18173
15137	b1013	-0.727206	-2.4696		15137	b1013	-0.71266	-2.04953		15137	b1013	-0.957145	-2.71141
15138	b1014	-0.18151	-1.36355		15138	b1014	-0.139765	-1.06705		15138	b1014	-0.253338	-1.82253
15139	b1015	0.230216	1.31382		15139	b1015	0.119754	0.676595		15139	b1015	0.201101	1.12363
15141	b1018	0.183849	0.904868		15141	b1018	0.187854	0.941583		15141	b1018	0.260074	1.33993
15142	b1019	0.662238	3.11997		15142	b1019	0.556084	2.66473		15142	b1019	0.678985	3.44578
15143	b1020	0.0645673	0.278101		15143	b1020	-0.00796985	-0.0365756		15143	b1020	-0.0227657	-0.0958641
15144	b1021	-0.481753	-1.61046		15144	b1021	-0.159725	-0.741478		15144	b1021	-0.432389	-1.46379
15145	b1022	-0.430778	-2.62872		15145	b1022	-0.376972	-2.39148		15145	b1022	-0.474371	-2.77742
15146	b1023	-0.45099	-2.15321		15146	b1023	-0.416176	-2.05648		15146	b1023	-0.385856	-2.12203
15147	b1024	-0.12923	-0.996725		15147	b1024	-0.143245	-1.10442		15147	b1024	-0.13261	-1.01656
15152	b1029	-0.0568318	-0.142616		15152	b1029	-0.17912	-0.501643		15152	b1029	-0.0630947	-0.141087
15155	b1033	-0.229782	-1.19766		15155	b1033	-0.262952	-1.35369		15155	b1033	-0.334222	-1.38678
15156	b1034	-0.310476	-1.68749		15156	b1034	-0.148285	-0.633021		15156	b1034	-0.201267	-0.911595
15157	b1035	0.412897	1.98017		15157	b1035	0.362341	1.52886		15157	b1035	0.423804	1.99615
15158	b1036	-0.0990926	-0.645923		15158	b1036	-0.233612	-1.10585		15158	b1036	-0.234327	-1.17027
15159	b1037	-0.0529713	-0.289259		15159	b1037	0.0489411	0.303366		15159	b1037	-0.0229274	-0.135139
15160	b1038	-0.289328	-0.904272		15160	b1038	-0.181288	-0.536271		15160	b1038	-0.267427	-0.877427
15161	b1039	-0.0716256	-0.293854		15161	b1039	-0.131973	-0.580746		15161	b1039	-0.332784	-1.5852
15163	b1041	-0.0608929	-0.269418		15163	b1041	-0.0238934	-0.0988987		15163	b1041	-0.0611447	-0.309301
15164	b1042	-0.014774	-0.0556808		15164	b1042	0.0433899	0.200261		15164	b1042	0.0742729	0.284194
15165	b1043	-0.182429	-1.13851		15165	b1043	-0.1058	-0.674024		15165	b1043	-0.227334	-1.26715
15166	b1044	-0.180033	-0.708297		15166	b1044	-0.343511	-1.29659		15166	b1044	-0.202953	-0.880913
15167	b1045	0.156232	0.724365		15167	b1045	0.179201	0.775965		15167	b1045	0.145852	0.649207
15168	b1046	0.0241518	0.126136		15168	b1046	-0.0174008	-0.0931011		15168	b1046	0.0575183	0.272372
15169	b1047	-0.133613	-0.720278		15169	b1047	-0.240903	-1.3804		15169	b1047	-0.195004	-1.08729
15170	b1048	-0.217718	-0.73932		15170	b1048	0.00648267	0.0237144		15170	b1048	-0.0052089	-0.0201746
15171	b1049	-0.333065	-1.88116		15171	b1049	-0.426295	-2.24161		15171	b1049	-0.180102	-1.00477
15175	b1053	0.0937991	0.450064		15175	b1053	-0.0696001	-0.372151		15175	b1053	-0.0118504	-0.0655731
15177	b1055	-0.317188	-1.33765		15177	b1055	-0.200224	-0.939756		15177	b1055	-0.286934	-1.34934
15178	b1056	0.330501	2.21061		15178	b1056	0.400938	2.37223		15178	b1056	0.441803	2.80831
15179	b1057	0.0644305	0.274453		15179	b1057	-0.103904	-0.429492		15179	b1057	0.0101505	0.0419783
15181	b1059	0.119243	0.871082		15181	b1059	0.143109	1.08884		15181	b1059	0.276987	2.00212
15182	b1060	-0.412486	-1.14846		15182	b1060	-0.656043	-2.10939		15182	b1060	-0.40162	-1.2372
15183	b1061	0.0466302	0.202584		15183	b1061	0.157778	1.02945		15183	b1061	0.0561937	0.351516
15184	b1062	0.0590197	0.294448		15184	b1062	0.00361038	0.0166651		15184	b1062	-0.165256	-0.76961
15186	b1064	-0.0269491	-0.0838088		15186	b1064	-0.0385934	-0.0983034		15186	b1064	-0.0130616	-0.0469736
15187	b1065	-0.0951417	-0.374976		15187	b1065	-0.161835	-0.704842		15187	b1065	-0.196789	-0.804042
15188	b1066	0.210477	1.14286		15188	b1066	0.198223	1.06282		15188	b1066	0.0426893	0.231368
15189	b1067	-0.151	-0.386372		15189	b1067	-0.247734	-0.904058		15189	b1067	-0.267612	-0.600797
15190	b1068	0.20146	0.993398		15190	b1068	0.239303	1.25088		15190	b1068	0.351986	1.53697
15194	b1072	-0.0492375	-0.257829		15194	b1072	-0.0838224	-0.431255		15194	b1072	0.0771875	0.357607
15195	b1073	0.28356	1.34492		15195	b1073	0.331864	1.50786		15195	b1073	0.448444	2.42839
15197	b1075	0.250647	0.566115		15197	b1075	0.233479	0.576587		15197	b1075	0.111684	0.214944
15198	b1076	-0.198248	-1.04064		15198	b1076	-0.269007	-1.44702		15198	b1076	-0.0745651	-0.396484
15199	b1077	-0.15479	-0.803926		15199	b1077	-0.0663036	-0.37818		15199	b1077	0.0688258	0.370781
15200	b1078	-0.0385519	-0.200883		15200	b1078	-0.0455156	-0.225978		15200	b1078	-0.0474038	-0.245014
15201	b1079	0.20174	0.701127		15201	b1079	0.171134	0.51984		15201	b1079	0.124611	0.420912
15202	b1080	-0.187026	-0.883721		15202	b1080	-0.163074	-0.808358		15202	b1080	-0.225708	-0.990299
15203	b1081	-0.342425	-1.88096		15203	b1081	-0.248171	-1.53412		15203	b1081	-0.188459	-1.07522
15204	b1082	-0.134717	-0.611858		15204	b1082	-0.12177	-0.580882		15204	b1082	-0.0305526	-0.13134
15205	b1083	-0.0102971	-0.0362001		15205	b1083	0.184503	0.715222		15205	b1083	-0.109667	-0.383889
15208	b1086	-0.406806	-1.6563		15208	b1086	-0.392341	-1.21485		15208	b1086	-0.395744	-1.54557
15209	b1087	-0.0864013	-0.366663		15209	b1087	-0.0430894	-0.172258		15209	b1087	-0.00917376	-0.0383223
15210	b1088	-0.485512	-1.59716		15210	b1088	-0.307509	-0.890597		15210	b1088	-0.426771	-1.38987
15212	b1090	0.195289	0.609651		15212	b1090	0.26238	0.963655		15212	b1090	0.37358	1.09747
15217	b1095	0.140624	0.701223		15217	b1095	0.111818	0.592842		15217	b1095	0.123151	0.638864
15218	b1096	0.121711	0.375713		15218	b1096	0.141865	0.497086		15218	b1096	0.222992	0.641786
15219	b1097	0.0994375	0.463286		15219	b1097	0.0357749	0.152489		15219	b1097	-0.119975	-0.543505
15222	b1100	-0.049764	-0.27646		15222	b1100	-0.140216	-0.759948		15222	b1100	-0.174751	-0.923074
15223	b1101	-0.0526211	-0.359735		15223	b1101	-0.0137454	-0.092335		15223	b1101	-0.0775316	-0.483827
15224	b1102	-0.107939	-0.719854		15224	b1102	-0.100969	-0.632426		15224	b1102	-0.0525316	-0.336629
15227	b1105	-0.268026	-0.718677		15227	b1105	-0.30303	-0.813068		15227	b1105	-0.198246	-0.524752
15228	b1106	-0.477038	-2.52491		15228	b1106	-0.310949	-1.65471		15228	b1106	-0.549536	-2.39155
15231	b1109	-0.679977	-2.65182		15231	b1109	-0.646924	-2.59739		15231	b1109	-0.747084	-2.61741
15232	b1110	0.201905	1.18212		15232	b1110	0.156636	0.984711		15232	b1110	0.252185	1.67617
15233	b1111	-0.242377	-0.467316		15233	b1111	-0.193686	-0.347699		15233	b1111	-0.521748	-0.692149
15235	b1113	-0.209489	-0.990823		15235	b1113	-0.145111	-0.649959		15235	b1113	-0.185677	-0.865009
15236	b1114	0.137553	0.808546		15236	b1114	0.161397	1.01295		15236	b1114	-0.0397278	-0.242577
15237	b1115	-0.12455	-0.665016		15237	b1115	-0.118608	-0.691541		15237	b1115	-0.255867	-1.37696
15241	b1119	0.094975	0.321881		15241	b1119	-0.0270517	-0.0867441		15241	b1119	-0.0112449	-0.0392331
15242	b1120	0.00656182	0.0277139		15242	b1120	-0.0584747	-0.269169		15242	b1120	0.19631	0.81425
15244	b1122	0.279835	1.69623		15244	b1122	0.333848	1.97305		15244	b1122	0.282935	1.69474
15245	b1123	-0.122811	-0.485432		15245	b1123	-0.132364	-0.53656		15245	b1123	-0.125656	-0.489766
15246	b1124	-0.158077	-0.444971		15246	b1124	0.126046	0.379356		15246	b1124	0.0812117	0.242411
15247	b1125	-0.0736833	-0.234368		15247	b1125	-0.155351	-0.471975		15247	b1125	-0.201562	-0.835166
15248	b1126	0.0300266	0.124259		15248	b1126	0.211818	0.916528		15248	b1126	0.253614	0.942497
15249	b1127	0.0413605	0.182805		15249	b1127	-0.0947876	-0.466184		15249	b1127	-0.103739	-0.411727
15250	b1128	0.0511701	0.218578		15250	b1128	0.00536076	0.0238833		15250	b1128	0.0670953	0.33668
15254	b1132	-0.580119	-2.08468		15254	b1132	-0.532879	-2.05629		15254	b1132	-0.674457	-2.28468
15257	b1135	0.213948	1.12483		15257	b1135	0.198915	0.863061		15257	b1135	0.164032	0.842607
15261	b1139	-0.676053	-1.82433		15261	b1139	-0.830358	-2.15697		15261	b1139	-1.03169	-2.79285
15262	b1140	0.0920845	0.658933		15262	b1140	0.180432	1.16896		15262	b1140	0.087123	0.588069
15263	b1141	0.195849	0.404555		15263	b1141	0.345088	0.82713		15263	b1141	0.205884	0.351012
15269	b1147	-0.3791	-0.644177		15269	b1147	-0.243124	-0.483542		15269	b1147	-0.165116	-0.293084
15273	b1151	-0.491774	-0.736394		15273	b1151	-0.237065	-0.377762		15273	b1151	-0.40803	-0.644669
15274	b1152	-0.738996	-1.75002		15274	b1152	-0.578115	-1.70129		15274	b1152	-0.70984	-2.27702
15275	b1153	0.0314248	0.0828716		15275	b1153	0.237313	0.586161		15275	b1153	0.131329	0.260498
15276	b1154	0.0914634	0.40824		15276	b1154	0.0341897	0.186074		15276	b1154	-0.0706978	-0.357269
15277	b1155	0.37167	1.52955		15277	b1155	0.31061	0.89003		15277	b1155	0.479902	1.51528
15278	b1156	0.170794	0.575946		15278	b1156	-0.0102772	-0.031314		15278	b1156	0.00688911	0.0228551
15280	b1158	-0.208276	-0.842082		15280	b1158	-0.106764	-0.485558		15280	b1158	0.012469	0.0623358
15284	b1162	-0.472199	-2.01809		15284	b1162	-0.267604	-1.13964		15284	b1162	-0.336259	-1.56945
15285	b1163	-0.806484	-3.36386		15285	b1163	-0.630413	-2.51765		15285	b1163	-0.683733	-2.70911
15294	b1172	-0.139034	-0.438452		15294	b1172	-0.0294029	-0.115741		15294	b1172	-0.168556	-0.543956
15297	b1175	-0.583856	-1.58547		15297	b1175	-0.489473	-1.39578		15297	b1175	-0.773103	-1.92457
15299	b1177	-0.0123711	-0.0502856		15299	b1177	0.256149	1.09788		15299	b1177	0.075591	0.325354
15300	b1178	0.0784138	0.338514		15300	b1178	-0.0108015	-0.041479		15300	b1178	0.0123652	0.0551062
15302	b1180	0.00116435	0.0054419		15302	b1180	0.239768	1.15358		15302	b1180	0.0902168	0.411858
15303	b1181	-0.501368	-2.24515		15303	b1181	-0.501186	-2.55184		15303	b1181	-0.377597	-1.85223
15306	b1184	0.120611	0.585291		15306	b1184	0.19694	0.940777		15306	b1184	0.195491	0.879882
15308	b1186	0.56066	2.14424		15308	b1186	0.66416	2.54777		15308	b1186	0.741497	2.89822
15309	b1187	-0.44395	-1.44802		15309	b1187	-0.315767	-1.15254		15309	b1187	-0.60167	-2.4208
15310	b1188	-0.00997045	-0.0415398		15310	b1188	0.0752348	0.323553		15310	b1188	0.0500543	0.205432
15311	b1189	0.156252	0.796393		15311	b1189	0.227715	1.12982		15311	b1189	0.229564	0.99817
15312	b1190	0.372826	1.39235		15312	b1190	0.320856	1.26629		15312	b1190	0.2462	0.858292
15313	b1191	-0.105891	-0.595059		15313	b1191	0.0432706	0.281713		15313	b1191	-0.0321276	-0.186039
15314	b1192	-1.16571	-3.25036		15314	b1192	-2.98378	-7.64258		15314	b1192	-3.70522	-10.0017
15316	b1194	-0.0437774	-0.18711		15316	b1194	0.109465	0.369921		15316	b1194	0.113049	0.441753
15317	b1195	-0.2939	-0.697112		15317	b1195	-0.290757	-0.891379		15317	b1195	-0.350376	-0.796657
15319	b1197	0.0451961	0.235836		15319	b1197	0.184408	1.11011		15319	b1197	0.0753266	0.393459
15320	b1198	0.24374	1.03061		15320	b1198	0.0704896	0.289274		15320	b1198	0.195342	0.747199
15321	b1199	-0.229662	-0.47696		15321	b1199	-0.290627	-0.593038		15321	b1199	-0.329575	-0.644567
15322	b1200	-0.100055	-0.431525		15322	b1200	-0.00522091	-0.0206958		15322	b1200	-0.0450618	-0.214395
15323	b1201	-0.150951	-0.64753		15323	b1201	-0.200649	-0.966633		15323	b1201	-0.071618	-0.311538
15324	b1202	0.0204724	0.152824		15324	b1202	0.0862366	0.619272		15324	b1202	0.203638	1.46577
15328	b1206	0.128022	0.858357		15328	b1206	0.160337	0.936516		15328	b1206	0.129797	0.771488
15335	b1213	0.183841	0.768104		15335	b1213	0.24295	0.784428		15335	b1213	0.506882	1.9737
15336	b1214	0.120345	0.419445		15336	b1214	0.121939	0.455188		15336	b1214	0.238422	0.775862
15338	b1216	0.181858	1.08499		15338	b1216	0.325293	2.10234		15338	b1216	0.260686	1.60336
15340	b1218	-0.188073	-0.52297		15340	b1218	-0.0309271	-0.081653		15340	b1218	0.0356929	0.114813
15341	b1219	-0.00641867	-0.015045		15341	b1219	0.122994	0.34491		15341	b1219	-0.17454	-0.311608
15342	b1220	-0.0886685	-0.429596		15342	b1220	-0.150364	-0.676078		15342	b1220	0.207834	1.11138
15343	b1221	-0.262459	-0.762945		15343	b1221	-0.198903	-0.635593		15343	b1221	-0.338806	-0.79688
15344	b1222	-0.151569	-0.52385		15344	b1222	0.0984338	0.304594		15344	b1222	0.0383029	0.139894
15345	b1223	-0.113218	-0.489646		15345	b1223	-0.0433399	-0.181228		15345	b1223	-0.0539605	-0.245729
15346	b1224	-0.118031	-0.690818		15346	b1224	-0.0459153	-0.274903		15346	b1224	-0.0827475	-0.469211
15347	b1225	0.572569	2.7417		15347	b1225	0.504523	1.90682		15347	b1225	0.563658	2.26841
15348	b1226	0.127335	0.474552		15348	b1226	0.110688	0.426992		15348	b1226	0.163625	0.7416
15349	b1227	0.112586	0.356727		15349	b1227	0.171115	0.771424		15349	b1227	0.285621	0.792205
15352	b1232	-0.622375	-2.11445		15352	b1232	-0.479128	-2.14211		15352	b1232	-0.682268	-3.17855
15353	b1233	0.0830858	0.279247		15353	b1233	0.0524868	0.168001		15353	b1233	0.250913	0.899494
15354	b1234	-0.257119	-0.974448		15354	b1234	-0.187926	-0.730284		15354	b1234	-0.289216	-1.15273
15358	b1238	-0.463666	-1.82881		15358	b1238	-0.223666	-0.872464		15358	b1238	-0.320538	-1.22756
15361	b1241	-0.0285054	-0.180755		15361	b1241	0.032937	0.225095		15361	b1241	-0.00292684	-0.0169054
15362	b1242	-0.161293	-0.43783		15362	b1242	-0.0769556	-0.227628		15362	b1242	-0.0782252	-0.229935
15363	b1243	-0.0515434	-0.285473		15363	b1243	-0.0118935	-0.0635163		15363	b1243	0.0221639	0.118993
15364	b1244	-0.00432603	-0.0214479		15364	b1244	0.0514696	0.265793		15364	b1244	-0.0693834	-0.328682
15365	b1245	0.018799	0.0828115		15365	b1245	0.143574	0.701244		15365	b1245	-0.0861081	-0.333043
15367	b1247	0.0757107	0.272911		15367	b1247	0.177839	0.697484		15367	b1247	0.163891	0.578903
15369	b1249	-0.462883	-2.00008		15369	b1249	-0.168611	-0.776267		15369	b1249	-0.243722	-1.03411
15370	b1250	0.0310607	0.140391		15370	b1250	0.0900792	0.345322		15370	b1250	0.0163539	0.0622785
15371	b1251	-0.489381	-1.61025		15371	b1251	-0.480908	-1.53655		15371	b1251	-0.543406	-1.2828
15373	b1253	0.12492	0.211205		15373	b1253	0.0204524	0.0352612		15373	b1253	0.322634	0.458212
15375	b1255	-0.280763	-1.05401		15375	b1255	-0.248807	-1.11552		15375	b1255	-0.361322	-1.37676
15376	b1256	-0.13807	-0.912426		15376	b1256	-0.168483	-1.28127		15376	b1256	-0.0342193	-0.238739
15380	b1260	-0.311946	-1.29545		15380	b1260	-0.34032	-1.29907		15380	b1260	-0.542885	-1.79774
15382	b1262	-0.0797153	-0.420487		15382	b1262	-0.169798	-0.925274		15382	b1262	-0.208591	-1.20339
15383	b1263	-0.335178	-1.01106		15383	b1263	-0.569921	-1.62059		15383	b1263	-0.414188	-1.19017
15384	b1264	0.290021	1.43899		15384	b1264	0.0725285	0.351981		15384	b1264	0.172775	0.687332
15386	b1266	-0.532596	-1.88667		15386	b1266	-0.800952	-2.83905		15386	b1266	-0.574327	-1.64834
15388	b1268	-0.220003	-1.11066		15388	b1268	-0.276089	-1.32701		15388	b1268	-0.0868283	-0.414116
15389	b1269	-0.97111	-2.82127		15389	b1269	-1.09976	-2.25575		15389	b1269	-0.605357	-1.15479
15390	b1270	-0.0908844	-0.226241		15390	b1270	-0.0728961	-0.202247		15390	b1270	-0.0200016	-0.0368636
15391	b1271	0.311494	0.61617		15391	b1271	0.292126	0.641256		15391	b1271	0.222371	0.494773
15392	b1272	-0.222866	-1.26966		15392	b1272	-0.236433	-1.11975		15392	b1272	-0.151488	-0.863628
15396	b1276	-0.0117689	-0.0576175		15396	b1276	-0.153062	-0.733459		15396	b1276	0.0349718	0.179271
15398	b1278	-0.980455	-1.40913		15398	b1278	-0.592989	-0.977505		15398	b1278	-0.996934	-1.331
15402	b1282	-0.00162984	-0.00649343		15402	b1282	0.0408677	0.171658		15402	b1282	-0.0424058	-0.164888
15403	b1283	0.0543382	0.311405		15403	b1283	0.000892028	0.00465061		15403	b1283	0.0515121	0.248679
15404	b1284	0.528675	2.07217		15404	b1284	0.435765	1.68315		15404	b1284	0.535416	2.31186
15405	b1285	-0.401062	-1.69572		15405	b1285	-0.429188	-1.76817		15405	b1285	-0.289897	-1.26623
15407	b1287	-0.212976	-0.285072		15407	b1287	-0.130454	-0.165252		15407	b1287	-0.190904	-0.192768
15409	b1289	-0.22635	-0.450511		15409	b1289	-0.335541	-0.830868		15409	b1289	-0.287468	-0.644329
15414	b1294	-0.261555	-1.15651		15414	b1294	-0.365207	-1.97649		15414	b1294	-0.107196	-0.410359
15416	b1296	0.0306438	0.118668		15416	b1296	0.179129	0.697567		15416	b1296	0.0312864	0.135992
15417	b1297	0.0151192	0.0584876		15417	b1297	-0.0686711	-0.298806		15417	b1297	0.00347085	0.0132853
15418	b1298	0.327311	0.467043		15418	b1298	0.194189	0.304369		15418	b1298	0.473593	0.799208
15419	b1299	0.905775	2.46707		15419	b1299	1.08347	3.21702		15419	b1299	0.941761	2.07704
15420	b1300	0.0986946	0.412615		15420	b1300	-0.109868	-0.450575		15420	b1300	-0.0261552	-0.114869
15421	b1301	0.342081	1.59819		15421	b1301	0.204775	0.895318		15421	b1301	0.405118	1.80264
15422	b1302	-0.443753	-1.06851		15422	b1302	-0.264648	-0.83783		15422	b1302	-0.394575	-1.30719
15423	b1303	0.269778	1.01494		15423	b1303	0.282707	1.0746		15423	b1303	0.280146	1.14871
15424	b1304	-0.623185	-1.29044		15424	b1304	-1.07793	-2.79444		15424	b1304	-0.962252	-2.8545
15425	b1305	-0.0307537	-0.0583106		15425	b1305	-0.0600904	-0.1186		15425	b1305	0.177506	0.44013
15426	b1306	0.0963587	0.181121		15426	b1306	-0.307693	-0.84833		15426	b1306	0.120408	0.258146
15428	b1308	-0.295361	-0.799779		15428	b1308	-0.661382	-2.02366		15428	b1308	-0.300757	-0.945128
15429	b1309	-0.660321	-1.24497		15429	b1309	-0.944157	-2.2916		15429	b1309	-0.906119	-1.82121
15430	b1310	-0.388795	-1.86564		15430	b1310	-0.34887	-1.67356		15430	b1310	-0.346043	-1.48567
15431	b1311	0.111969	0.533345		15431	b1311	0.0216303	0.124716		15431	b1311	-0.00928633	-0.0482816
15432	b1312	0.374312	1.84019		15432	b1312	0.34864	2.1125		15432	b1312	0.309263	1.5919
15433	b1313	0.210371	0.856219		15433	b1313	0.116595	0.409909		15433	b1313	0.171751	0.622388
15434	b1314	0.24793	0.940001		15434	b1314	0.182351	0.698036		15434	b1314	0.120203	0.390741
15435	b1315	-0.0208134	-0.0656512		15435	b1315	0.0039277	0.0163379		15435	b1315	0.0258422	0.111897
15436	b1316	0.202032	1.30781		15436	b1316	0.10961	0.694462		15436	b1316	0.13705	0.853656
15437	b1317	0.119385	0.515461		15437	b1317	-0.0110008	-0.0394348		15437	b1317	0.0264761	0.100094
15439	b1319	-0.135532	-0.59934		15439	b1319	-0.275086	-1.33542		15439	b1319	-0.286146	-1.26788
15440	b1320	0.0238092	0.0874221		15440	b1320	0.0134115	0.0566866		15440	b1320	-0.0188391	-0.0752116
15441	b1321	-0.0190522	-0.0724236		15441	b1321	-0.0853552	-0.299974		15441	b1321	-0.00292684	-0.0108662
15442	b1322	-0.182995	-0.683749		15442	b1322	-0.0436333	-0.197878		15442	b1322	0.00986515	0.0368903
15443	b1323	-0.58936	-2.21487		15443	b1323	-0.698669	-2.23251		15443	b1323	-0.571127	-1.54133
15444	b1324	0.469076	1.46761		15444	b1324	0.28771	1.05655		15444	b1324	0.622899	1.84984
15445	b1325	-0.027448	-0.0801038		15445	b1325	0.112173	0.354766		15445	b1325	-0.0361949	-0.108299
15446	b1326	-0.0560966	-0.16612		15446	b1326	-0.102289	-0.48965		15446	b1326	-0.0845895	-0.305257
15447	b1327	0.175855	0.846933		15447	b1327	0.175495	0.914543		15447	b1327	0.185927	0.877672
15448	b1328	-0.106109	-0.435274		15448	b1328	-0.0837862	-0.293234		15448	b1328	-0.230697	-0.87696
15449	b1329	-0.0938416	-0.442214		15449	b1329	0.00308766	0.0139555		15449	b1329	-0.105534	-0.47347
15450	b1330	-0.321923	-0.647398		15450	b1330	-0.677927	-1.4767		15450	b1330	-0.322966	-0.64058
15453	b1333	0.173471	0.281447		15453	b1333	0.0635681	0.108209		15453	b1333	0.0767952	0.123264
15456	b1336	0.202602	0.617639		15456	b1336	0.243839	0.788721		15456	b1336	0.109957	0.347313
15457	b1337	-0.0488305	-0.196553		15457	b1337	-0.0792362	-0.324395		15457	b1337	-0.00292684	-0.0107967
15458	b1338	0.00485987	0.0252983		15458	b1338	-0.0475781	-0.250706		15458	b1338	-0.00166399	-0.00873063
15459	b1339	0.442269	1.49819		15459	b1339	0.473644	1.78588		15459	b1339	0.503553	1.83858
15461	b1341	0.300572	1.88487		15461	b1341	0.342973	2.02499		15461	b1341	0.348236	2.07318
15462	b1342	-0.009691	-0.0533986		15462	b1342	-0.106691	-0.675162		15462	b1342	-0.102855	-0.569315
15463	b1343	-0.00215431	-0.00833154		15463	b1343	0.183194	0.810085		15463	b1343	0.186304	0.703683
15464	b1344	0.248275	1.09045		15464	b1344	-0.0969416	-0.306616		15464	b1344	0.24957	1.03531
15465	b1345	0.23482	0.881227		15465	b1345	0.179188	0.708782		15465	b1345	0.0891221	0.299189
15469	b1349	0.230953	1.1284		15469	b1349	0.179609	0.829742		15469	b1349	0.237174	1.01789
15470	b1350	0.104107	0.489839		15470	b1350	0.00939012	0.0435448		15470	b1350	0.272102	1.3501
15474	b1353	-0.353078	-1.51466		15474	b1353	-0.212605	-1.02674		15474	b1353	-0.233627	-0.799918
15476	b4527	0.261178	1.006		15476	b4527	0.219205	0.637934		15476	b4527	0.214104	0.713526
15477	b1355	0.436021	1.4858		15477	b1355	0.371634	1.48239		15477	b1355	0.152613	0.371768
15481	b1359	-0.414108	-1.02873		15481	b1359	-0.300137	-0.879982		15481	b1359	-0.343633	-0.976854
15482	b1360	0.522777	0.987549		15482	b1360	0.219766	0.499443		15482	b1360	0.624013	1.85665
15487	b1365	0.187758	1.11671		15487	b1365	0.310852	1.90011		15487	b1365	0.171541	1.00714
15488	b1366	-0.0428404	-0.189944		15488	b1366	0.0121015	0.0528966		15488	b1366	-0.180877	-0.79959
15494	b1372	0.554803	2.65885		15494	b1372	0.468682	2.23999		15494	b1372	0.406821	1.88479
15498	b1376	0.0994448	0.523446		15498	b1376	0.132647	0.711196		15498	b1376	0.0207737	0.103741
15499	b1377	-0.27505	-0.73586		15499	b1377	0.0210883	0.0602843		15499	b1377	-0.251625	-1.04578
15500	b1378	-0.11646	-0.584647		15500	b1378	-0.226647	-1.41929		15500	b1378	-0.187136	-0.954445
15501	b1379	0.220566	0.663079		15501	b1379	0.0468922	0.121725		15501	b1379	0.0188305	0.0476364
15503	b1381	0.0839511	0.504582		15503	b1381	-0.00613662	-0.0356843		15503	b1381	-0.0312633	-0.181241
15504	b1382	-0.350163	-0.746149		15504	b1382	-0.80789	-1.6855		15504	b1382	-0.420591	-0.863076
15506	b1384	-0.116164	-0.42328		15506	b1384	0.0246566	0.108867		15506	b1384	-0.0999231	-0.303748
15507	b1385	0.362668	1.80497		15507	b1385	0.318242	1.49891		15507	b1385	0.281314	1.4274
15508	b1386	-0.153139	-1.06487		15508	b1386	-0.110105	-0.677363		15508	b1386	-0.0947087	-0.576493
15509	b1387	0.216907	0.955069		15509	b1387	0.131681	0.760413		15509	b1387	0.28639	1.47897
15510	b1388	0.0732691	0.302372		15510	b1388	0.195734	0.754144		15510	b1388	0.157869	0.610223
15512	b1390	-0.00432603	-0.010521		15512	b1390	-0.0280902	-0.0569778		15512	b1390	-0.0916571	-0.203153
15514	b1392	0.402061	1.47207		15514	b1392	0.22552	0.819294		15514	b1392	0.325386	1.1726
15516	b1394	0.0806324	0.272227		15516	b1394	0.192618	0.586349		15516	b1394	0.354262	1.10277
15517	b1395	-0.142576	-0.657504		15517	b1395	-0.00509794	-0.0264169		15517	b1395	-0.132353	-0.634846
15518	b1396	0.734719	2.40208		15518	b1396	0.505533	1.45078		15518	b1396	0.721588	2.31934
15519	b1397	0.141955	0.756963		15519	b1397	0.105458	0.528054		15519	b1397	0.196522	0.926464
15521	b1399	0.37338	1.01921		15521	b1399	0.384795	1.25263		15521	b1399	0.206381	0.502413
15522	b1400	-0.777479	-2.26273		15522	b1400	-0.478718	-1.09302		15522	b1400	-0.693986	-1.82897
15528	b1406	0.339566	1.21407		15528	b1406	0.264049	1.09957		15528	b1406	0.095951	0.327326
15529	b1407	-0.103231	-0.357025		15529	b1407	-0.419593	-1.3825		15529	b1407	-0.124027	-0.397869
15530	b1408	-0.26172	-0.861257		15530	b1408	-0.287087	-1.07634		15530	b1408	-0.282765	-0.866456
15532	b1410	0.113263	0.379655		15532	b1410	0.143282	0.443457		15532	b1410	0.155011	0.501289
15533	b1411	0.013247	0.073373		15533	b1411	-0.00756019	-0.0417421		15533	b1411	-0.218161	-1.02326
15534	b1412	0.0461871	0.121883		15534	b1412	-0.174033	-0.413744		15534	b1412	0.216311	0.700979
15535	b1413	0.0440667	0.222125		15535	b1413	-0.00214364	-0.0107174		15535	b1413	0.14358	0.748122
15536	b1414	0.15829	0.618657		15536	b1414	0.0121446	0.0463537		15536	b1414	-0.154553	-0.670686
15537	b1415	-0.218658	-0.614306		15537	b1415	-0.0561291	-0.166551		15537	b1415	0.053496	0.154148
15539	b1418	0.0977093	0.223994		15539	b1418	0.00477261	0.011026		15539	b1418	-0.022008	-0.0483071
15540	b1419	0.157929	0.750528		15540	b1419	-0.246989	-1.03193		15540	b1419	-0.108739	-0.386671
15542	b1421	-0.0872924	-0.370458		15542	b1421	0.0322537	0.138218		15542	b1421	0.0823478	0.340601
15543	b1422	0.0984415	0.564563		15543	b1422	0.0515327	0.318485		15543	b1422	-0.16738	-0.631613
15544	b1423	0.396805	1.08224		15544	b1423	0.296205	0.833738		15544	b1423	0.360248	1.35858
15545	b1424	-0.467943	-1.81306		15545	b1424	-0.254312	-1.08631		15545	b1424	-0.397501	-1.33215
15548	b1427	-0.0343031	-0.0820803		15548	b1427	0.0855301	0.21624		15548	b1427	-0.160277	-0.341885
15549	b1428	0.017525	0.0920564		15549	b1428	-0.107207	-0.521962		15549	b1428	-0.0416986	-0.184989
15551	b1430	0.323158	0.924032		15551	b1430	0.227226	0.708867		15551	b1430	0.34488	1.17253
15552	b1431	0.466036	1.50252		15552	b1431	0.440717	1.3392		15552	b1431	0.60528	1.90448
15553	b1432	0.0609634	0.262042		15553	b1432	-0.0624379	-0.259577		15553	b1432	-0.17332	-0.732282
15554	b1433	0.15393	0.632392		15554	b1433	-0.0436088	-0.169338		15554	b1433	-0.0341718	-0.13243
15556	b1435	-0.0626289	-0.321158		15556	b1435	0.0693713	0.418561		15556	b1435	0.0857572	0.405774
15558	b4532	0.383305	1.38246		15558	b4532	0.539741	1.87061		15558	b4532	0.688832	2.44397
15560	b1439	0.0759626	0.382958		15560	b1439	0.180289	0.959083		15560	b1439	0.106298	0.594925
15561	b1440	0.185511	1.16451		15561	b1440	0.101692	0.620049		15561	b1440	0.0952782	0.524605
15562	b1441	-0.110921	-0.541728		15562	b1441	-0.0933928	-0.471699		15562	b1441	-0.231367	-0.987353
15563	b1442	-0.0615868	-0.197794		15563	b1442	-0.0782466	-0.374348		15563	b1442	0.00738282	0.0317653
15564	b1443	-0.0365099	-0.178635		15564	b1443	-0.0016161	-0.00857204		15564	b1443	-0.201202	-1.0026
15565	b1444	-0.0410718	-0.187406		15565	b1444	0.000892028	0.00381999		15565	b1444	-0.0888677	-0.28231
15570	b1449	-0.113331	-0.55251		15570	b1449	-0.00891975	-0.0451934		15570	b1449	-0.00495377	-0.0272915
15571	b1450	-0.350298	-1.03154		15571	b1450	-0.242648	-0.729339		15571	b1450	-0.241016	-0.640391
15572	b1451	0.208075	1.44007		15572	b1451	0.198131	1.14706		15572	b1451	0.294294	1.96581
15573	b1452	-0.0762218	-0.330084		15573	b1452	-0.0798155	-0.335753		15573	b1452	-0.224116	-1.05533
15574	b1453	0.197064	0.672421		15574	b1453	0.139189	0.496152		15574	b1453	0.174743	0.562059
15577	b1456	0.10813	0.4886		15577	b1456	0.059023	0.281694		15577	b1456	0.0464758	0.215481
15582	b1461	0.0128219	0.0367762		15582	b1461	0.236565	0.57935		15582	b1461	0.0970502	0.20663
15583	b1462	0.498248	1.09907		15583	b1462	0.483758	1.00727		15583	b1462	0.56564	1.27812
15584	b1463	0.19293	0.918681		15584	b1463	0.122552	0.525145		15584	b1463	0.189926	0.756793
15585	b1464	-0.128457	-0.485982		15585	b1464	-0.176354	-0.631249		15585	b1464	-0.144583	-0.504624
15586	b1465	-0.398756	-0.91026		15586	b1465	-0.539874	-1.24137		15586	b1465	-0.450077	-0.992575
15587	b1466	0.514148	2.93034		15587	b1466	0.574972	2.93875		15587	b1466	0.521251	2.7497
15588	b1467	0.146138	0.726052		15588	b1467	0.151946	0.727719		15588	b1467	0.179654	0.973626
15589	b1468	-0.0265613	-0.163399		15589	b1468	0.00182213	0.0116478		15589	b1468	-0.0831311	-0.447289
15590	b1469	-0.129986	-0.406342		15590	b1469	0.0400533	0.125138		15590	b1469	-0.0985398	-0.284741
15594	b1473	-0.0917747	-0.478867		15594	b1473	-0.15328	-0.738804		15594	b1473	-0.0900074	-0.452605
15595	b1474	0.243449	1.08819		15595	b1474	0.197336	0.870542		15595	b1474	0.262979	1.1002
15596	b1475	0.0431887	0.202559		15596	b1475	-0.152382	-0.805456		15596	b1475	-0.0604007	-0.284168
15599	b1478	0.00122079	0.00237849		15599	b1478	-0.0682781	-0.105965		15599	b1478	-0.297045	-0.459469
15600	b1479	-0.105965	-0.548485		15600	b1479	0.108349	0.549461		15600	b1479	-0.0885606	-0.499887
15602	b1481	0.263986	0.788318		15602	b1481	0.241747	0.806791		15602	b1481	0.235367	0.701625
15604	b1483	0.251226	0.934632		15604	b1483	0.179302	0.612759		15604	b1483	-0.00115315	-0.00379628
15605	b1484	0.278945	1.22905		15605	b1484	0.213517	0.99601		15605	b1484	0.283277	1.27886
15608	b1487	0.298708	0.832468		15608	b1487	0.483587	1.58392		15608	b1487	0.165635	0.374626
15609	b1488	0.329978	0.83518		15609	b1488	0.728032	1.87344		15609	b1488	0.217586	0.482876
15610	b1489	-0.248189	-0.812727		15610	b1489	-0.415512	-1.69012		15610	b1489	-0.375583	-1.57229
15611	b1490	0.0374983	0.130084		15611	b1490	0.113469	0.439059		15611	b1490	0.206365	0.84113
15612	b1491	0.238765	0.902628		15612	b1491	0.168591	0.68149		15612	b1491	0.234702	1.02508
15613	b1492	0.192824	1.07692		15613	b1492	0.188037	1.07327		15613	b1492	0.151639	0.86524
15615	b1494	0.137403	0.745156		15615	b1494	0.102472	0.570491		15615	b1494	0.100368	0.516259
15616	b1495	-0.310751	-1.5246		15616	b1495	-0.328371	-1.64251		15616	b1495	-0.354152	-1.69442
15617	b1496	-0.539578	-1.84288		15617	b1496	-0.771653	-2.57248		15617	b1496	-0.510234	-1.81249
15619	b1498	-0.505722	-1.51215		15619	b1498	-0.678245	-2.46678		15619	b1498	-0.583529	-1.74393
15622	b1501	0.05252	0.265355		15622	b1501	0.106182	0.543965		15622	b1501	0.0726484	0.366329
15625	b1504	0.30284	0.934567		15625	b1504	0.0745199	0.216077		15625	b1504	0.159001	0.452332
15628	b1507	0.0338625	0.118024		15628	b1507	0.0491715	0.200838		15628	b1507	0.0948134	0.35759
15632	b1511	-0.00432603	-0.0177864		15632	b1511	0.0912929	0.525064		15632	b1511	-0.0963834	-0.490522
15633	b1512	0.385671	0.884257		15633	b1512	0.478942	1.23548		15633	b1512	0.569524	1.5613
15634	b1513	-0.0881239	-0.21712		15634	b1513	-0.183394	-0.541814		15634	b1513	0.0878164	0.24691
15636	b1515	0.121752	0.560235		15636	b1515	0.0736348	0.344		15636	b1515	0.130098	0.521549
15637	b1516	0.159028	0.396605		15637	b1516	-0.180419	-0.455517		15637	b1516	0.00291061	0.00766049
15638	b1517	0.0492475	0.19977		15638	b1517	-0.0467689	-0.212718		15638	b1517	0.0071927	0.0322974
15639	b1518	-0.775391	-1.62786		15639	b1518	-0.724975	-1.88114		15639	b1518	-0.868639	-2.03467
15640	b1519	0.523378	1.64648		15640	b1519	0.403343	1.45067		15640	b1519	0.553526	1.49617
15641	b1520	-0.293827	-0.788018		15641	b1520	-0.243819	-0.696694		15641	b1520	-0.347678	-0.967338
15643	b1522	0.0446443	0.196369		15643	b1522	0.176533	0.797384		15643	b1522	0.269912	1.17538
15646	b1525	0.0194639	0.0680377		15646	b1525	0.186352	0.717534		15646	b1525	0.338583	1.31316
15647	b1526	-0.309095	-0.865908		15647	b1526	-0.169829	-0.409872		15647	b1526	-0.250799	-0.518064
15649	b1528	0.165055	0.574064		15649	b1528	-0.0444985	-0.12962		15649	b1528	-0.203366	-0.590153
15655	b1534	0.0240701	0.0947819		15655	b1534	-0.0607575	-0.278592		15655	b1534	-0.183147	-0.668107
15656	b1535	-0.0936742	-0.296447		15656	b1535	-0.245801	-0.737538		15656	b1535	-0.17294	-0.618967
15659	b1537	0.0511596	0.178224		15659	b1537	-0.0328216	-0.11749		15659	b1537	-0.115398	-0.388404
15660	b1538	-0.134467	-0.726627		15660	b1538	-0.0799133	-0.432848		15660	b1538	-0.190225	-1.0514
15661	b1539	-0.317873	-0.904227		15661	b1539	-0.210122	-0.642386		15661	b1539	-0.320105	-0.92893
15664	b1542	0.403989	1.26507		15664	b1542	0.346828	1.09278		15664	b1542	0.183673	0.550434
15669	b1547	-0.103595	-0.432057		15669	b1547	-0.0526074	-0.214787		15669	b1547	-0.112636	-0.389448
15681	b1559	0.481407	1.88946		15681	b1559	0.404539	1.61197		15681	b1559	0.280029	1.12875
15682	b1560	-0.13443	-0.460183		15682	b1560	-0.106336	-0.431994		15682	b1560	0.113116	0.401138
15684	b1562	0.0923992	0.230828		15684	b1562	0.181526	0.462128		15684	b1562	0.133443	0.322969
15687	b1565	-0.212489	-0.595604		15687	b1565	-0.0849135	-0.308228		15687	b1565	-0.0819197	-0.236904
15688	b1566	-1.14311	-2.61412		15688	b1566	-0.541744	-1.39613		15688	b1566	-0.861054	-2.39032
15691	b1569	-0.441681	-1.8302		15691	b1569	-0.629547	-2.41094		15691	b1569	-0.59465	-2.33312
15698	b1577	-0.0215272	-0.0834687		15698	b1577	0.0570808	0.253189		15698	b1577	0.0772502	0.268585
15701	b1580	0.106434	0.379124		15701	b1580	0.132472	0.555339		15701	b1580	0.18615	0.713133
15702	b1581	-0.199707	-0.415069		15702	b1581	-0.0160859	-0.0537552		15702	b1581	-0.10816	-0.277185
15703	b1582	-0.383739	-0.894877		15703	b1582	0.00810596	0.0216128		15703	b1582	-0.320934	-0.890206
15705	b1584	-0.04752	-0.269307		15705	b1584	0.0396532	0.233673		15705	b1584	0.025964	0.134216
15706	b1585	-0.12384	-0.551771		15706	b1585	-0.153446	-0.536817		15706	b1585	-0.11642	-0.467558
15707	b1586	0.00833728	0.0364742		15707	b1586	0.228403	0.965204		15707	b1586	-0.120849	-0.490232
15708	b1587	-0.147535	-0.92224		15708	b1587	-0.0062014	-0.043095		15708	b1587	-0.133958	-0.85759
15709	b1588	-0.0172266	-0.0574315		15709	b1588	0.133819	0.521154		15709	b1588	0.0477207	0.140925
15710	b1589	-0.248102	-0.752206		15710	b1589	-0.135674	-0.466367		15710	b1589	-0.475191	-1.49447
15711	b1590	0.197569	0.792343		15711	b1590	0.248442	1.01413		15711	b1590	0.356284	1.32601
15713	b1592	0.067551	0.300332		15713	b1592	0.083419	0.357833		15713	b1592	-0.158326	-0.662543
15714	b1593	0.242089	0.537356		15714	b1593	0.423343	1.13156		15714	b1593	0.647925	2.24713
15717	b1596	-0.141768	-0.696584		15717	b1596	-0.0452474	-0.221221		15717	b1596	-0.292273	-1.31177
15718	b1597	-0.0787187	-0.236592		15718	b1597	-0.0723834	-0.20016		15718	b1597	-0.030324	-0.0954572
15719	b1598	0.355382	1.56715		15719	b1598	0.371757	2.03486		15719	b1598	0.468831	2.80264
15722	b1601	0.194759	0.682856		15722	b1601	0.292677	1.2881		15722	b1601	0.367773	1.2577
15723	b1602	0.014373	0.0344712		15723	b1602	0.0893058	0.183426		15723	b1602	0.154569	0.323938
15724	b1603	0.11779	0.343215		15724	b1603	0.249804	0.766972		15724	b1603	0.280332	0.838412
15725	b1604	-0.0701672	-0.329421		15725	b1604	-0.284688	-1.02281		15725	b1604	-0.323257	-1.27397
15726	b1605	0.361142	1.78992		15726	b1605	0.249475	1.34069		15726	b1605	0.360804	1.95388
15727	b1606	0.542774	2.65617		15727	b1606	0.451972	2.33972		15727	b1606	0.477368	2.19586
15729	b1608	-0.0352646	-0.0922227		15729	b1608	-0.202022	-0.485222		15729	b1608	-0.049239	-0.114064
15730	b1609	-0.0495988	-0.13374		15730	b1609	-0.139533	-0.446465		15730	b1609	-0.0118174	-0.0373415
15731	b1610	-0.0560503	-0.245134		15731	b1610	-0.0276442	-0.11841		15731	b1610	0.0547042	0.223916
15732	b1611	0.0897769	0.38912		15732	b1611	0.108417	0.437408		15732	b1611	0.00410715	0.0170973
15735	b1614	0.235641	1.09394		15735	b1614	0.217774	0.836696		15735	b1614	0.143493	0.545186
15736	b1615	-0.0851711	-0.300061		15736	b1615	-0.298055	-0.775623		15736	b1615	-0.177864	-0.584952
15737	b1616	-0.164127	-0.837247		15737	b1616	-0.0769305	-0.430632		15737	b1616	-0.138928	-0.754376
15738	b1617	0.0845323	0.375146		15738	b1617	0.106588	0.582593		15738	b1617	0.0222914	0.104197
15739	b1618	-0.419368	-1.23086		15739	b1618	-0.334651	-1.32627		15739	b1618	-0.453956	-1.29747
15740	b1619	-0.235413	-0.940356		15740	b1619	-0.0580481	-0.250286		15740	b1619	-0.214201	-0.846774
15742	b1621	-0.21978	-0.645228		15742	b1621	-0.0677271	-0.243393		15742	b1621	-0.118542	-0.350196
15743	b1622	0.0198012	0.0969457		15743	b1622	0.0041231	0.02084		15743	b1622	0.258895	1.0984
15744	b1623	-0.0311775	-0.153872		15744	b1623	0.265312	1.38807		15744	b1623	0.102731	0.438572
15745	b1624	-0.27964	-1.50195		15745	b1624	-0.209543	-1.14375		15745	b1624	-0.0708953	-0.391969
15746	b1625	-0.246303	-0.90404		15746	b1625	-0.205814	-0.941422		15746	b1625	-0.16293	-0.626022
15747	b1626	-0.373131	-1.94075		15747	b1626	-0.377949	-1.95478		15747	b1626	-0.297769	-1.5053
15748	b1627	0.0517112	0.170427		15748	b1627	0.0693643	0.253866		15748	b1627	0.154664	0.460752
15749	b1628	0.286069	0.492983		15749	b1628	0.0959633	0.16812		15749	b1628	0.256539	0.446232
15750	b1629	0.247587	0.936531		15750	b1629	0.303231	1.33031		15750	b1629	0.281697	1.04202
15751	b1630	0.293961	1.11841		15751	b1630	0.329737	1.13685		15751	b1630	0.445907	1.53507
15753	b1632	0.358362	1.54752		15753	b1632	0.268502	1.22608		15753	b1632	0.438236	1.93974
15754	b1633	0.235835	0.671937		15754	b1633	0.240011	0.778477		15754	b1633	0.316266	0.853658
15755	b1634	-0.102797	-0.27915		15755	b1634	-0.243336	-0.732512		15755	b1634	-0.269079	-0.656511
15756	b1635	0.257734	1.14347		15756	b1635	0.313247	1.37753		15756	b1635	0.325562	1.32854
15757	b1636	-0.17724	-0.670312		15757	b1636	-0.232573	-0.755669		15757	b1636	-0.149775	-0.484065
15760	b1639	-0.456586	-1.16583		15760	b1639	-0.206706	-0.592183		15760	b1639	-0.237804	-0.550257
15761	b1640	0.152156	0.39107		15761	b1640	0.192607	0.62972		15761	b1640	0.123366	0.320571
15764	b1643	-0.331536	-0.996136		15764	b1643	-0.256242	-0.746968		15764	b1643	-0.42813	-1.54151
15765	b1644	-0.230328	-0.802583		15765	b1644	-0.177598	-0.594042		15765	b1644	0.0282569	0.107759
15766	b1645	-0.0478193	-0.299309		15766	b1645	-0.177412	-1.05128		15766	b1645	-0.106499	-0.635862
15771	b1650	-0.205528	-0.963045		15771	b1650	-0.160311	-0.742495		15771	b1650	-0.0833558	-0.402867
15774	b1653	0.201691	1.12297		15774	b1653	0.212806	1.16964		15774	b1653	0.248312	1.37913
15777	b1656	0.117799	0.247924		15777	b1656	0.279444	0.836702		15777	b1656	0.0212913	0.0458833
15778	b1657	-0.0155603	-0.0575913		15778	b1657	0.0736474	0.29904		15778	b1657	0.120771	0.446861
15779	b1658	-0.665847	-2.291		15779	b1658	-0.473914	-1.76359		15779	b1658	-0.483576	-1.65091
15780	b1659	0.023771	0.0406922		15780	b1659	-0.131029	-0.235506		15780	b1659	-0.0044561	-0.00798535
15782	b1661	0.136783	0.61537		15782	b1661	0.311269	1.48468		15782	b1661	0.221533	0.954047
15785	b1664	-0.626022	-2.83388		15785	b1664	-0.331252	-1.58492		15785	b1664	-0.377283	-2.02455
15786	b1667	0.276411	0.630802		15786	b1667	0.241551	0.558098		15786	b1667	0.280256	0.618806
15787	b1668	0.0284332	0.113778		15787	b1668	0.0575706	0.252106		15787	b1668	0.098097	0.37773
15788	b1669	-0.4888	-1.0645		15788	b1669	-0.399829	-0.893657		15788	b1669	-0.269818	-0.603022
15789	b1670	-0.141393	-0.36233		15789	b1670	-0.172888	-0.475632		15789	b1670	-0.18717	-0.469102
15790	b1671	-0.00602071	-0.0129012		15790	b1671	-0.22331	-0.376341		15790	b1671	-0.166751	-0.225546
15791	b1672	0.107996	0.426835		15791	b1672	0.165036	0.782709		15791	b1672	0.234171	1.03671
15792	b1673	0.0940253	0.262111		15792	b1673	0.272966	0.84875		15792	b1673	0.099294	0.301636
15793	b1674	0.0285981	0.118929		15793	b1674	0.000892028	0.00373798		15793	b1674	0.0791605	0.316811
15794	b1675	0.194399	0.415241		15794	b1675	0.0173296	0.025638		15794	b1675	0.350886	0.672534
15795	b1676	-0.906158	-3.2842		15795	b1676	-0.703543	-2.67586		15795	b1676	-0.763236	-2.72501
15797	b1678	-0.384743	-2.01932		15797	b1678	-0.344305	-1.96313		15797	b1678	-0.449251	-2.34227
15798	b1679	0.167672	0.508916		15798	b1679	0.012293	0.0469977		15798	b1679	0.370077	1.39322
15799	b1680	-0.161472	-0.704297		15799	b1680	-0.00571655	-0.0249275		15799	b1680	-0.0755223	-0.332098
15800	b1681	-0.0826532	-0.357392		15800	b1681	0.0357344	0.221774		15800	b1681	-0.0260634	-0.128523
15801	b1682	-0.251658	-1.41293		15801	b1682	-0.106952	-0.550356		15801	b1682	-0.10153	-0.46052
15802	b1683	-0.00234514	-0.0128802		15802	b1683	0.0868481	0.56536		15802	b1683	0.072171	0.382043
15806	b1687	-0.205862	-1.07234		15806	b1687	-0.232633	-1.21903		15806	b1687	-0.275847	-1.45824
15807	b1688	-0.17654	-0.798253		15807	b1688	-0.00867238	-0.0448804		15807	b1688	0.0950161	0.508
15812	b1693	-0.408708	-1.90768		15812	b1693	-0.520308	-2.0732		15812	b1693	-0.868898	-3.48913
15813	b1694	0.197025	0.661127		15813	b1694	0.212263	0.789796		15813	b1694	0.321974	0.973386
15814	b1695	-0.121663	-0.592234		15814	b1695	-0.0965602	-0.488179		15814	b1695	-0.0897697	-0.431488
15816	b1697	0.0411937	0.193085		15816	b1697	0.184924	0.837588		15816	b1697	0.255767	0.993494
15817	b1698	0.214495	0.852041		15817	b1698	0.145475	0.537449		15817	b1698	0.19685	0.67762
15818	b1699	-0.443969	-1.33705		15818	b1699	-0.159995	-0.474304		15818	b1699	-0.148203	-0.480754
15820	b1701	0.0289028	0.123759		15820	b1701	-0.0739015	-0.323535		15820	b1701	-0.0328868	-0.132868
15821	b1702	0.187899	1.24358		15821	b1702	0.318205	2.02872		15821	b1702	0.315549	1.86885
15822	b1703	0.124707	0.541925		15822	b1703	0.000892028	0.00428218		15822	b1703	0.197171	0.919086
15823	b1704	0.210062	0.862335		15823	b1704	0.330151	1.54762		15823	b1704	0.375799	1.52296
15825	b1706	-0.122231	-0.491913		15825	b1706	-0.251627	-1.02937		15825	b1706	0.0534674	0.233906
15826	b1707	-0.284405	-1.04194		15826	b1707	-0.369124	-1.09444		15826	b1707	-0.263392	-0.779217
15827	b1708	0.805977	2.7262		15827	b1708	0.768081	2.15634		15827	b1708	0.775639	2.37879
15829	b1710	0.534479	0.993894		15829	b1710	0.409173	0.833015		15829	b1710	0.500361	0.964097
15830	b1711	-0.0974748	-0.258644		15830	b1711	-0.124018	-0.323188		15830	b1711	-0.16352	-0.419181
15840	b1722	-0.302307	-1.59726		15840	b1722	-0.188127	-0.891182		15840	b1722	-0.146572	-0.696235
15841	b1723	-0.104499	-0.392272		15841	b1723	0.108469	0.421828		15841	b1723	0.0833937	0.300416
15843	b1725	0.0652262	0.266842		15843	b1725	0.173441	0.699852		15843	b1725	0.207595	0.830561
15845	b1727	-0.706863	-2.30567		15845	b1727	-0.869149	-2.68449		15845	b1727	-1.00173	-3.50857
15846	b1728	0.305312	1.04124		15846	b1728	0.319698	0.992704		15846	b1728	0.401295	1.04307
15847	b1729	-0.707952	-1.82		15847	b1729	-0.481249	-1.71253		15847	b1729	-0.672005	-1.84583
15849	b1731	0.361765	0.814234		15849	b1731	0.463826	0.816206		15849	b1731	0.438025	0.907572
15851	b1733	0.267514	0.695817		15851	b1733	0.140882	0.39275		15851	b1733	0.216621	0.64451
15852	b1734	-0.318152	-1.02064		15852	b1734	-0.209816	-0.79877		15852	b1734	-0.279041	-0.954655
15855	b1737	0.100758	0.434261		15855	b1737	0.145811	0.568572		15855	b1737	0.0864954	0.361902
15856	b1738	0.336192	1.29352		15856	b1738	0.21699	0.899832		15856	b1738	0.219951	0.956317
15857	b1739	0.0194854	0.0636963		15857	b1739	-0.38546	-1.17782		15857	b1739	-0.494748	-1.4344
15859	b1741	0.210901	0.527632		15859	b1741	0.159675	0.40097		15859	b1741	0.278182	0.648007
15861	b1743	0.238542	1.03281		15861	b1743	0.281387	1.17192		15861	b1743	0.18134	0.714861
15862	b1744	-0.236043	-1.2521		15862	b1744	-0.192934	-0.992097		15862	b1744	-0.0334761	-0.177753
15863	b1745	-0.282623	-1.34043		15863	b1745	-0.260829	-1.27891		15863	b1745	-0.177375	-0.839154
15864	b1746	-0.0908931	-0.428235		15864	b1746	-0.118421	-0.538101		15864	b1746	-0.0323111	-0.153996
15865	b1747	-0.236573	-1.21918		15865	b1747	-0.35863	-1.48364		15865	b1747	-0.0755857	-0.371329
15866	b1748	0.0742525	0.367811		15866	b1748	0.332456	1.76191		15866	b1748	0.268442	1.38693
15867	b1749	-0.0415942	-0.163839		15867	b1749	0.142831	0.601224		15867	b1749	-0.00292684	-0.0116949
15868	b1750	-0.21424	-0.867658		15868	b1750	-0.16643	-0.755025		15868	b1750	-0.17325	-0.84133
15869	b1751	-0.325259	-1.10789		15869	b1751	-0.471314	-1.4832		15869	b1751	-0.267645	-0.949498
15870	b1752	0.469339	1.83431		15870	b1752	0.428861	1.54516		15870	b1752	0.657283	2.381
15871	b1753	-0.300746	-0.591816		15871	b1753	-0.207303	-0.408821		15871	b1753	-0.187163	-0.416733
15873	b1755	-0.445361	-1.35635		15873	b1755	-0.149404	-0.684197		15873	b1755	-0.399253	-1.3887
15874	b1756	0.458155	1.76964		15874	b1756	0.471909	2.18175		15874	b1756	0.509843	1.85744
15875	b1757	-0.262587	-0.890192		15875	b1757	-0.23886	-0.774087		15875	b1757	-0.179735	-0.503346
15878	b1760	-0.334613	-1.5068		15878	b1760	-0.705369	-3.26222		15878	b1760	-0.441085	-1.56342
15879	b1761	-0.130305	-0.550925		15879	b1761	-0.116648	-0.534054		15879	b1761	-0.0482945	-0.214263
15881	b1763	-0.656633	-2.03783		15881	b1763	-0.228824	-1.17744		15881	b1763	-0.160669	-0.607812
15882	b1764	-0.359898	-0.922951		15882	b1764	-0.541995	-1.4807		15882	b1764	-0.245894	-0.724868
15884	b1766	-0.00365829	-0.0181476		15884	b1766	0.149697	0.793051		15884	b1766	0.171908	0.729267
15885	b1767	-0.0775056	-0.298813		15885	b1767	0.0406463	0.185892		15885	b1767	-0.0848437	-0.345938
15886	b1768	-0.075002	-0.517169		15886	b1768	0.0187843	0.132115		15886	b1768	0.0806998	0.552066
15887	b1769	-0.217645	-0.639175		15887	b1769	-0.0624794	-0.190508		15887	b1769	-0.188222	-0.455497
15888	b1770	-0.512134	-2.6022		15888	b1770	-0.289514	-1.69218		15888	b1770	-0.360745	-2.00948
15889	b1771	-0.300947	-1.39875		15889	b1771	-0.293458	-1.12365		15889	b1771	-0.404788	-1.60659
15890	b1772	0.188424	0.488972		15890	b1772	-0.0866811	-0.282172		15890	b1772	0.205155	0.499837
15892	b1774	-0.440279	-1.92486		15892	b1774	-0.339094	-1.57054		15892	b1774	-0.373991	-1.47485
15893	b1775	0.153662	0.979599		15893	b1775	0.219312	1.41473		15893	b1775	0.157687	0.987878
15894	b1776	0.200388	0.770353		15894	b1776	0.203077	0.908304		15894	b1776	0.299484	1.06656
15895	b1777	-0.125948	-0.292147		15895	b1777	-0.120018	-0.282958		15895	b1777	0.006145	0.0139636
15898	b1780	-0.497016	-2.3802		15898	b1780	-0.522633	-2.48722		15898	b1780	-0.307222	-1.43349
15899	b1781	0.187331	0.773677		15899	b1781	0.224066	0.759229		15899	b1781	0.502157	2.22256
15900	b1782	-0.07621	-0.271053		15900	b1782	-0.078081	-0.260837		15900	b1782	-0.041467	-0.13541
15901	b1783	0.281208	1.65378		15901	b1783	0.371398	2.32987		15901	b1783	0.188234	1.00733
15902	b1784	-0.206314	-0.874064		15902	b1784	-0.265368	-1.21362		15902	b1784	-0.149116	-0.529163
15904	b1786	-0.0313867	-0.213419		15904	b1786	-0.0252461	-0.178507		15904	b1786	-0.00292684	-0.0204294
15905	b1787	0.362769	1.52117		15905	b1787	0.33075	1.70911		15905	b1787	0.437532	2.12883
15907	b1789	0.0345252	0.136046		15907	b1789	-0.144431	-0.453344		15907	b1789	-0.114215	-0.388162
15908	b1790	-0.168651	-0.335423		15908	b1790	-0.202691	-0.381551		15908	b1790	0.0231751	0.0498909
15909	b1791	0.159055	0.827723		15909	b1791	0.355176	1.66416		15909	b1791	0.23239	1.22647
15910	b1792	-0.0364416	-0.110572		15910	b1792	-0.202284	-0.688141		15910	b1792	0.00990618	0.0358669
15911	b1793	-0.29486	-0.522642		15911	b1793	-0.268115	-0.708299		15911	b1793	-0.492959	-0.905654
15912	b1794	-0.151459	-0.602433		15912	b1794	-0.129059	-0.531292		15912	b1794	-0.287175	-1.12496
15913	b1795	-0.0869015	-0.196		15913	b1795	0.244412	0.553167		15913	b1795	0.16947	0.317598
15914	b1796	-0.0671219	-0.250199		15914	b1796	-0.231359	-0.790329		15914	b1796	-0.24473	-0.922864
15915	b1797	0.467448	2.48688		15915	b1797	0.440737	2.50336		15915	b1797	0.381175	2.13334
15916	b1798	-0.34115	-1.77663		15916	b1798	-0.378108	-2.08659		15916	b1798	-0.361929	-1.89655
15917	b1799	-0.842083	-3.38908		15917	b1799	-0.938556	-3.35822		15917	b1799	-1.03926	-2.38555
15918	b1800	-0.00432603	-0.0215681		15918	b1800	0.109142	0.628883		15918	b1800	-0.00741406	-0.0387084
15919	b1801	-0.103228	-0.575579		15919	b1801	-0.019251	-0.105505		15919	b1801	-0.0413618	-0.216462
15920	b1802	-0.249799	-1.12795		15920	b1802	0.0880251	0.389239		15920	b1802	-0.0965467	-0.394883
15921	b1803	0.324839	1.22753		15921	b1803	0.273485	1.1185		15921	b1803	0.283025	1.1922
15922	b1804	-0.394026	-1.26245		15922	b1804	-0.130347	-0.531494		15922	b1804	-0.326273	-0.97146
15923	b1805	-0.067851	-0.39193		15923	b1805	-0.126241	-0.777204		15923	b1805	-0.20916	-1.14901
15924	b1806	0.2264	1.02703		15924	b1806	0.343363	1.32108		15924	b1806	0.0930032	0.403271
15926	b1808	0.287934	1.34426		15926	b1808	0.374602	1.72915		15926	b1808	0.356149	1.80378
15927	b1809	-0.128179	-0.767085		15927	b1809	-0.0345094	-0.183905		15927	b1809	-0.199595	-1.08999
15928	b1810	-0.234447	-1.03357		15928	b1810	-0.122383	-0.560105		15928	b1810	-0.260029	-1.37473
15929	b1811	0.455989	1.24004		15929	b1811	0.352858	0.929921		15929	b1811	0.215979	0.659757
15930	b1812	0.416932	1.87347		15930	b1812	0.268392	1.14031		15930	b1812	0.463532	2.18922
15931	b1813	-0.0563618	-0.305549		15931	b1813	0.0591985	0.354356		15931	b1813	0.0964175	0.534259
15932	b1814	-0.321455	-0.968788		15932	b1814	-0.362361	-0.950156		15932	b1814	-0.228212	-0.839118
15933	b1815	0.252958	1.12474		15933	b1815	0.207642	0.93305		15933	b1815	0.287384	1.19013
15934	b1816	0.24608	1.0073		15934	b1816	0.228779	0.955988		15934	b1816	0.401921	1.81264
15935	b1817	0.160025	0.900714		15935	b1817	0.277149	1.62321		15935	b1817	0.322505	1.539
15937	b1819	-0.163259	-0.707733		15937	b1819	-0.0163024	-0.0844612		15937	b1819	-0.136313	-0.705921
15938	b1820	-0.00844553	-0.0476299		15938	b1820	-0.124731	-0.679135		15938	b1820	-0.0780827	-0.431835
15939	b1821	-0.390147	-1.05116		15939	b1821	-0.115749	-0.365947		15939	b1821	-0.235301	-0.716809
15940	b1822	0.112999	0.353492		15940	b1822	0.039835	0.13783		15940	b1822	0.0178516	0.0484114
15942	b1824	0.48579	1.54325		15942	b1824	0.423447	1.24532		15942	b1824	0.246356	0.703328
15945	b1827	-0.11075	-0.319997		15945	b1827	-0.077477	-0.232738		15945	b1827	-0.00308963	-0.00882329
15946	b1828	0.326122	1.2894		15946	b1828	0.435274	2.02838		15946	b1828	0.444581	1.64581
15947	b1829	0.420921	1.68411		15947	b1829	0.461216	2.09505		15947	b1829	0.484487	2.11641
15948	b1830	-0.625086	-2.97991		15948	b1830	-0.658923	-3.08445		15948	b1830	-1.14407	-4.76285
15950	b1832	-0.459288	-1.93079		15950	b1832	-0.355459	-1.56676		15950	b1832	-0.342729	-1.44562
15951	b1833	0.00537404	0.0262884		15951	b1833	0.0957047	0.469358		15951	b1833	-0.0699283	-0.369129
15952	b1834	0.0395889	0.235676		15952	b1834	0.154779	0.994174		15952	b1834	0.171486	0.975295
15953	b1835	-0.240295	-0.904157		15953	b1835	-0.0746372	-0.352236		15953	b1835	-0.180516	-0.786255
15954	b1836	0.709635	1.61536		15954	b1836	0.855663	1.75989		15954	b1836	0.689814	1.5292
15956	b1838	-0.347892	-0.936353		15956	b1838	-0.205118	-0.781357		15956	b1838	-0.438534	-1.4688
15958	b1840	0.217738	0.851417		15958	b1840	0.228755	0.988443		15958	b1840	0.257622	1.0675
15961	b1843	0.16067	0.430795		15961	b1843	0.384811	1.26594		15961	b1843	0.188634	0.484577
15962	b1844	-0.150129	-0.51973		15962	b1844	-0.225443	-0.737882		15962	b1844	-0.208231	-0.617871
15963	b1845	0.030211	0.174988		15963	b1845	-0.0282496	-0.174833		15963	b1845	0.0559636	0.299664
15964	b1846	-0.167457	-0.6904		15964	b1846	-0.0231356	-0.0977869		15964	b1846	-0.0349668	-0.147794
15967	b1849	0.0181031	0.0850607		15967	b1849	-0.0948853	-0.498687		15967	b1849	-0.109572	-0.580493
15969	b1851	-0.131021	-0.854822		15969	b1851	-0.0338474	-0.221646		15969	b1851	-0.167996	-1.01119
15971	b1853	0.0492505	0.131167		15971	b1853	0.0602616	0.138014		15971	b1853	-0.0139534	-0.0459973
15972	b1854	-0.12377	-0.530245		15972	b1854	0.0280224	0.12404		15972	b1854	0.0540987	0.221751
15973	b1855	-1.13336	-3.31782		15973	b1855	-0.866234	-2.1905		15973	b1855	-0.974474	-2.68999
15974	b1856	-1.1766	-5.45878		15974	b1856	-0.99898	-4.17241		15974	b1856	-1.30007	-5.31836
15975	b1857	-0.00879596	-0.0325735		15975	b1857	-0.0849355	-0.329715		15975	b1857	-0.121384	-0.375485
15976	b1858	0.304315	1.20679		15976	b1858	0.472095	2.12461		15976	b1858	0.476151	1.88041
15977	b1859	0.147178	0.597898		15977	b1859	0.210637	0.927984		15977	b1859	0.133585	0.550822
15980	b1862	-0.4696	-0.980839		15980	b1862	-0.516623	-1.12776		15980	b1862	-0.570317	-1.26037
15982	b1864	-0.196735	-0.705369		15982	b1864	-0.329225	-1.20986		15982	b1864	-0.20262	-0.725149
15985	b1867	0.203951	0.594099		15985	b1867	0.288926	0.977183		15985	b1867	0.236111	0.605698
15986	b1868	0.111648	0.13933		15986	b1868	0.220139	0.300531		15986	b1868	0.421787	0.582073
15987	b1869	0.256526	1.16011		15987	b1869	0.142781	0.781481		15987	b1869	0.316457	1.47035
15990	b1872	-0.0743821	-0.369988		15990	b1872	-0.0793916	-0.361084		15990	b1872	-0.0649356	-0.295224
15991	b1873	-0.137117	-0.708612		15991	b1873	-0.0918936	-0.474536		15991	b1873	-0.0776494	-0.426112
15993	b1875	0.0579413	0.231534		15993	b1875	-0.13396	-0.502127		15993	b1875	-0.0758522	-0.297307
15996	b1878	0.11725	0.379503		15996	b1878	-0.0735187	-0.245223		15996	b1878	-0.170604	-0.603638
15997	b1879	0.106898	0.540546		15997	b1879	0.16761	1.00524		15997	b1879	0.201513	1.20607
15998	b1880	0.470679	2.51947		15998	b1880	0.406948	2.08305		15998	b1880	0.419485	2.3015
15999	b1881	0.109878	0.626416		15999	b1881	0.194731	1.15035		15999	b1881	0.191255	1.04789
16001	b1883	-0.112362	-0.553984		16001	b1883	-0.0119827	-0.0463328		16001	b1883	0.0325863	0.165759
16002	b1884	-0.198761	-0.78519		16002	b1884	0.0070049	0.0231524		16002	b1884	-0.167637	-0.603374
16003	b1885	-0.0300196	-0.128701		16003	b1885	0.273277	1.29328		16003	b1885	0.115659	0.50031
16004	b1886	0.124361	0.684426		16004	b1886	0.0706732	0.424714		16004	b1886	0.088805	0.478362
16005	b1887	0.0554729	0.2908		16005	b1887	0.104146	0.702043		16005	b1887	0.0387256	0.203218
16006	b1888	0.422091	2.00128		16006	b1888	0.393497	2.29816		16006	b1888	0.413901	2.09944
16007	b1889	-0.31097	-1.64319		16007	b1889	-0.20785	-1.22393		16007	b1889	-0.381627	-2.12093
16008	b1890	-0.385336	-1.03861		16008	b1890	-0.0668422	-0.256937		16008	b1890	-0.381467	-1.03441
16009	b1891	0.0716375	0.264305		16009	b1891	-0.0819813	-0.272002		16009	b1891	0.114673	0.427484
16010	b1892	-0.165219	-0.773599		16010	b1892	-0.314182	-1.54797		16010	b1892	-0.301094	-1.39156
16013	b1895	0.0412321	0.143458		16013	b1895	0.192593	0.897512		16013	b1895	0.00347598	0.0148007
16014	b1896	0.0439537	0.324196		16014	b1896	0.0937322	0.705403		16014	b1896	-0.291013	-1.99998
16015	b1897	0.349875	1.5083		16015	b1897	0.124911	0.530092		16015	b1897	-0.0209153	-0.0840085
16017	b1900	-0.022285	-0.0956723		16017	b1900	-0.0155724	-0.0642035		16017	b1900	-0.00819802	-0.0318987
16018	b1901	0.259206	0.940025		16018	b1901	0.387014	1.29688		16018	b1901	0.179225	0.61671
16019	b1902	0.219672	0.695602		16019	b1902	0.155324	0.502475		16019	b1902	0.122602	0.353044
16021	b1904	0.0545649	0.158721		16021	b1904	-0.106278	-0.266426		16021	b1904	-0.157009	-0.473447
16022	b1905	0.0768706	0.386022		16022	b1905	-0.0643643	-0.309867		16022	b1905	0.0794408	0.395956
16024	b1907	-0.199136	-0.386307		16024	b1907	0.087722	0.2395		16024	b1907	-0.103645	-0.263896
16025	b1908	-0.28078	-1.15117		16025	b1908	-0.216402	-0.792066		16025	b1908	-0.0358458	-0.123024
16027	b1913	0.268853	1.20787		16027	b1913	0.172787	0.659112		16027	b1913	0.176698	0.706868
16028	b1914	-0.116312	-0.463937		16028	b1914	-0.10949	-0.48742		16028	b1914	-0.251432	-0.910388
16029	b1915	0.0676591	0.264678		16029	b1915	-0.00522084	-0.024117		16029	b1915	0.057615	0.279319
16030	b1916	0.1635	1.04139		16030	b1916	0.256662	1.71661		16030	b1916	0.285336	1.82794
16031	b1917	-0.132317	-0.390408		16031	b1917	-0.219828	-0.622513		16031	b1917	-0.42781	-1.05021
16032	b1918	0.431015	1.128		16032	b1918	0.517475	1.33622		16032	b1918	0.463479	0.917499
16033	b1919	0.159196	0.455322		16033	b1919	0.280585	0.92062		16033	b1919	0.242234	0.828427
16035	b1921	-0.544425	-1.26547		16035	b1921	-0.430892	-1.46298		16035	b1921	-0.617267	-1.3312
16036	b1922	-0.139676	-0.770879		16036	b1922	-0.169004	-0.805013		16036	b1922	-0.0613359	-0.344728
16037	b1923	-0.0465209	-0.263679		16037	b1923	0.110478	0.645477		16037	b1923	0.0278831	0.153246
16038	b1924	0.358198	1.06892		16038	b1924	0.275909	0.841071		16038	b1924	0.375882	1.10676
16039	b1925	0.160578	0.39501		16039	b1925	0.0970685	0.263864		16039	b1925	0.189292	0.461039
16040	b1926	0.224994	0.327925		16040	b1926	0.348648	0.568789		16040	b1926	0.539211	0.883261
16041	b1927	0.0610661	0.260889		16041	b1927	-0.107929	-0.479985		16041	b1927	-0.102219	-0.410116
16042	b1928	0.270523	1.13305		16042	b1928	0.241981	1.06883		16042	b1928	0.143735	0.556516
16043	b1929	-0.173896	-1.24388		16043	b1929	-0.0141518	-0.0917049		16043	b1929	-0.195905	-1.23259
16044	b1930	0.112667	0.707062		16044	b1930	0.0835308	0.529293		16044	b1930	0.0528973	0.317948
16046	b1932	0.27834	1.2424		16046	b1932	0.366993	1.63329		16046	b1932	0.237663	0.958366
16052	b1938	-0.158291	-0.997634		16052	b1938	-0.179264	-0.979601		16052	b1938	-0.2101	-1.1546
16053	b1939	-0.31518	-0.699303		16053	b1939	-0.203903	-0.455202		16053	b1939	-0.36911	-0.824169
16054	b1940	-0.202624	-0.762268		16054	b1940	-0.125668	-0.705942		16054	b1940	-0.131542	-0.563435
16055	b1941	0.152072	0.814719		16055	b1941	-0.0288926	-0.150425		16055	b1941	0.122041	0.642483
16057	b1943	0.357842	1.51095		16057	b1943	0.337051	1.40429		16057	b1943	0.369243	1.546
16058	b1944	-0.0159932	-0.0629171		16058	b1944	-0.0260552	-0.100383		16058	b1944	-0.0782345	-0.318748
16059	b1945	0.326132	1.50165		16059	b1945	0.368198	1.82793		16059	b1945	0.290052	1.5264
16060	b1946	-0.076552	-0.324102		16060	b1946	-0.267191	-0.797276		16060	b1946	-0.102443	-0.45093
16062	b1948	0.394383	1.51583		16062	b1948	0.43368	1.87215		16062	b1948	0.35551	1.33244
16063	b1949	-0.369878	-0.693628		16063	b1949	-0.158494	-0.340407		16063	b1949	-0.204824	-0.37427
16066	b1952	-0.138594	-0.716043		16066	b1952	0.0738668	0.420399		16066	b1952	-0.0767165	-0.421274
16067	b1953	-0.0347803	-0.0612116		16067	b1953	-0.00856066	-0.0162297		16067	b1953	-0.0581194	-0.0809329
16068	b1955	-0.0951217	-0.233352		16068	b1955	-0.220029	-0.559069		16068	b1955	0.0791387	0.207876
16069	b1956	0.298059	1.85864		16069	b1956	0.286033	1.55886		16069	b1956	0.256967	1.40536
16071	b1958	0.0543124	0.21201		16071	b1958	0.0748537	0.274741		16071	b1958	0.150942	0.529446
16072	b1959	-0.17488	-0.603134		16072	b1959	-0.000567347	-0.0023609		16072	b1959	0.00921945	0.0260355
16073	b1960	0.556275	1.39136		16073	b1960	0.773243	1.97075		16073	b1960	0.507417	1.13175
16075	b1962	0.416126	1.51286		16075	b1962	0.530489	1.89808		16075	b1962	0.335277	1.22622
16076	b1963	-0.172847	-0.496449		16076	b1963	-0.343695	-0.908093		16076	b1963	-0.172757	-0.504858
16080	b1967	0.101883	0.552627		16080	b1967	0.164766	0.930478		16080	b1967	0.164658	0.907503
16082	b1969	-0.697202	-2.60607		16082	b1969	-0.503706	-1.6982		16082	b1969	-0.646487	-2.1825
16084	b1971	-0.436501	-1.69363		16084	b1971	-0.236993	-0.938083		16084	b1971	-0.494972	-1.82955
16085	b1972	0.211819	1.02908		16085	b1972	0.136128	0.804842		16085	b1972	0.169803	0.842011
16086	b1973	-0.265447	-0.771106		16086	b1973	-0.240632	-0.844464		16086	b1973	-0.3337	-0.964914
16087	b1974	0.0228334	0.123628		16087	b1974	0.0320366	0.183862		16087	b1974	0.0919283	0.489628
16088	b1976	0.0602008	0.161238		16088	b1976	0.000494872	0.000999575		16088	b1976	0.347678	0.885095
16089	b1978	-0.0745147	-0.602546		16089	b1978	-0.00212836	-0.0177792		16089	b1978	-0.031573	-0.258038
16092	b1981	-0.276596	-1.05585		16092	b1981	-0.240763	-0.994944		16092	b1981	-0.203496	-0.691542
16093	b1982	-0.260335	-1.38961		16093	b1982	-0.305756	-1.53972		16093	b1982	-0.341026	-1.69803
16094	b1983	-0.119077	-0.404859		16094	b1983	-0.232307	-1.0182		16094	b1983	0.0293659	0.104191
16095	b1985	-0.240576	-1.18791		16095	b1985	-0.485824	-2.34496		16095	b1985	-0.331683	-1.58705
16096	b1987	-0.106734	-0.485807		16096	b1987	-0.0983097	-0.436271		16096	b1987	-0.0207135	-0.0869359
16097	b1988	0.0479489	0.153499		16097	b1988	0.31758	0.943908		16097	b1988	0.0467526	0.161396
16098	b1990	-0.0121662	-0.0580701		16098	b1990	-0.0972671	-0.492376		16098	b1990	0.0267947	0.126045
16099	b1991	-0.480585	-2.79762		16099	b1991	-0.45747	-2.38239		16099	b1991	-0.377362	-2.01644
16101	b1993	0.0234357	0.0871729		16101	b1993	0.02645	0.120792		16101	b1993	-0.0540681	-0.220118
16107	b1999	-0.284878	-0.981207		16107	b1999	-0.077414	-0.351259		16107	b1999	-0.0116398	-0.047613
16109	b2001	0.0929814	0.518476		16109	b2001	0.0826472	0.513202		16109	b2001	0.100697	0.54501
16110	b2002	0.141618	0.720053		16110	b2002	0.216234	1.21886		16110	b2002	0.219351	1.40469
16111	b2003	0.110014	0.468599		16111	b2003	0.125069	0.43553		16111	b2003	0.254903	1.03592
16112	b2004	-0.201749	-0.809623		16112	b2004	-0.224594	-0.972189		16112	b2004	-0.226193	-1.04583
16113	b2005	-0.130141	-0.383563		16113	b2005	-0.138525	-0.463136		16113	b2005	-0.247715	-0.586739
16114	b2006	-0.402709	-1.50701		16114	b2006	-0.288839	-0.865366		16114	b2006	-0.401781	-1.64489
16115	b2007	0.0260689	0.0857647		16115	b2007	-0.053379	-0.175596		16115	b2007	-0.120464	-0.342386
16116	b2008	0.280492	1.17829		16116	b2008	0.197517	0.959352		16116	b2008	0.234328	0.902821
16117	b2009	-0.141355	-0.397888		16117	b2009	-0.0594003	-0.177887		16117	b2009	-0.286178	-0.856012
16118	b2010	0.00101603	0.00441885		16118	b2010	0.00125566	0.00599837		16118	b2010	-0.0232734	-0.0955537
16119	b2011	-0.109532	-0.574917		16119	b2011	-0.00630711	-0.0331181		16119	b2011	-0.159833	-0.806955
16120	b2012	0.717812	1.76721		16120	b2012	0.502459	1.11285		16120	b2012	0.552982	1.50819
16121	b2013	0.153381	0.719706		16121	b2013	0.21519	1.14638		16121	b2013	0.103116	0.545528
16122	b2014	0.403087	2.24856		16122	b2014	0.317781	1.85653		16122	b2014	0.126278	0.650993
16123	b2015	0.0456924	0.123595		16123	b2015	0.445686	1.4957		16123	b2015	0.221746	0.654442
16124	b2016	0.252257	1.2243		16124	b2016	0.286056	1.39522		16124	b2016	0.160233	0.814114
16127	b2019	-0.0363146	-0.157605		16127	b2019	-0.0201093	-0.0800609		16127	b2019	-0.139874	-0.596968
16128	b2020	0.18852	0.971836		16128	b2020	0.220602	1.17252		16128	b2020	0.176332	0.883061
16129	b2021	-0.319488	-1.37025		16129	b2021	-0.206499	-1.07711		16129	b2021	-0.425151	-1.60899
16130	b2022	0.31088	1.56943		16130	b2022	0.255415	1.24831		16130	b2022	0.372267	1.75938
16131	b2023	-0.0343777	-0.168282		16131	b2023	0.00456685	0.0226434		16131	b2023	-0.136045	-0.549789
16132	b2024	0.0508489	0.14628		16132	b2024	0.0540994	0.148481		16132	b2024	0.0260772	0.0714511
16133	b2025	-0.44435	-1.53155		16133	b2025	-0.325649	-1.02781		16133	b2025	-0.762568	-2.42711
16134	b2026	0.251007	1.213		16134	b2026	0.162113	0.927956		16134	b2026	0.281023	1.60374
16135	b2027	-0.15889	-0.738709		16135	b2027	-0.145329	-0.718924		16135	b2027	0.0331428	0.133628
16136	b2028	-0.151526	-0.942352		16136	b2028	-0.0738702	-0.465912		16136	b2028	-0.155982	-0.97076
16137	b2029	-0.168585	-0.80233		16137	b2029	-0.0236259	-0.119015		16137	b2029	0.0391371	0.186531
16140	b2032	-0.34891	-1.90505		16140	b2032	-0.34131	-1.92175		16140	b2032	-0.373929	-1.99818
16141	b2033	-0.188731	-0.916069		16141	b2033	-0.251399	-1.31074		16141	b2033	-0.323087	-1.5807
16142	b2034	-0.00382314	-0.0265118		16142	b2034	0.0255912	0.178877		16142	b2034	-0.0562622	-0.369222
16143	b2035	-0.188471	-1.16161		16143	b2035	-0.188115	-1.14762		16143	b2035	-0.31059	-1.70473
16144	b2036	-0.264252	-1.60962		16144	b2036	-0.293153	-1.85836		16144	b2036	-0.296925	-1.85933
16145	b2037	-0.42095	-2.08089		16145	b2037	-0.548728	-2.96066		16145	b2037	-0.449619	-2.2271
16146	b2038	-0.0619697	-0.267871		16146	b2038	-0.0640271	-0.301308		16146	b2038	-0.0720744	-0.355412
16147	b2039	0.0857397	0.682378		16147	b2039	0.0456848	0.359338		16147	b2039	-0.00745923	-0.0564746
16148	b2040	-0.0401568	-0.241386		16148	b2040	0.0876131	0.52863		16148	b2040	0.0617299	0.383844
16149	b2041	-0.0695595	-0.526358		16149	b2041	-0.0394767	-0.311106		16149	b2041	-0.0946321	-0.711406
16150	b2042	0.265699	1.32333		16150	b2042	0.405136	1.99092		16150	b2042	0.279716	1.28851
16151	b2043	-0.0221167	-0.122925		16151	b2043	-0.0274354	-0.156179		16151	b2043	-0.0088647	-0.0489015
16152	b2044	0.0759456	0.2803		16152	b2044	0.20132	0.806003		16152	b2044	0.108436	0.395564
16153	b2045	0.160726	0.976947		16153	b2045	0.225164	1.41089		16153	b2045	0.0898356	0.476762
16154	b2046	-0.320405	-1.90251		16154	b2046	-0.260134	-1.39539		16154	b2046	-0.262824	-1.42916
16155	b2047	0.263987	1.26731		16155	b2047	0.203079	0.738968		16155	b2047	0.268537	1.2946
16156	b2048	0.0936959	0.455808		16156	b2048	-0.000764315	-0.0036386		16156	b2048	-0.102396	-0.313643
16157	b2049	0.0593743	0.283235		16157	b2049	-0.0504659	-0.216587		16157	b2049	0.0100744	0.0518604
16158	b2050	-0.229711	-1.00135		16158	b2050	0.0896918	0.44371		16158	b2050	-0.114104	-0.534846
16160	b2052	0.283762	1.38382		16160	b2052	0.294842	1.2037		16160	b2052	0.199509	0.847228
16161	b2053	0.146654	0.75392		16161	b2053	0.16494	0.78842		16161	b2053	0.0696581	0.299479
16162	b2054	-0.245572	-0.72996		16162	b2054	-0.0605647	-0.200639		16162	b2054	-0.174608	-0.594903
16164	b2056	-0.156777	-0.776857		16164	b2056	-0.127879	-0.706994		16164	b2056	-0.198151	-1.0622
16165	b2057	0.268109	1.46389		16165	b2057	0.362671	1.55059		16165	b2057	0.119042	0.620848
16167	b2059	-0.520581	-1.9457		16167	b2059	-0.184817	-0.755009		16167	b2059	-0.19056	-0.770455
16168	b2060	-0.234203	-0.934935		16168	b2060	0.0231805	0.107606		16168	b2060	-0.196968	-0.767679
16169	b2061	0.31267	0.741692		16169	b2061	0.0783362	0.184771		16169	b2061	0.222868	0.504979
16170	b2062	0.0957415	0.507868		16170	b2062	-0.0372512	-0.210841		16170	b2062	0.0284151	0.157451
16171	b2063	-0.112008	-0.462672		16171	b2063	-0.0164601	-0.0686486		16171	b2063	-0.0398149	-0.177094
16172	b2064	0.095656	0.58612		16172	b2064	0.00256364	0.0167523		16172	b2064	-0.0348	-0.211692
16174	b2066	0.156621	0.514193		16174	b2066	-0.015813	-0.0489654		16174	b2066	0.0313354	0.0979489
16175	b2067	-0.0693257	-0.484048		16175	b2067	0.0569755	0.406863		16175	b2067	-0.0580445	-0.410194
16176	b2068	-0.0365024	-0.149674		16176	b2068	0.0375734	0.15468		16176	b2068	-0.0285526	-0.0859006
16177	b2069	0.0917245	0.504323		16177	b2069	0.0924353	0.482304		16177	b2069	0.0921717	0.50972
16178	b2070	-0.106311	-0.49331		16178	b2070	-0.249199	-1.23219		16178	b2070	-0.190696	-0.92379
16180	b2072	0.333246	1.3128		16180	b2072	0.387353	1.87069		16180	b2072	0.396115	1.77228
16181	b2073	0.0898361	0.477781		16181	b2073	0.122121	0.608009		16181	b2073	0.245609	1.23586
16182	b2074	0.125604	0.647008		16182	b2074	0.159236	0.806543		16182	b2074	0.187621	0.834234
16183	b2075	0.105521	0.750765		16183	b2075	0.148802	1.06252		16183	b2075	0.179138	1.32527
16184	b2076	0.180849	1.09807		16184	b2076	0.219678	1.43714		16184	b2076	0.130951	0.808539
16185	b2077	-0.17996	-1.05181		16185	b2077	-0.116698	-0.685393		16185	b2077	-0.204045	-1.07753
16186	b2078	0.0245222	0.123088		16186	b2078	-0.0156376	-0.0816414		16186	b2078	0.109661	0.584708
16187	b2079	0.181341	0.693107		16187	b2079	0.432477	2.07146		16187	b2079	0.312628	1.16921
16188	b2080	0.0737913	0.153334		16188	b2080	0.00180529	0.0037762		16188	b2080	0.0631619	0.126201
16189	b2081	0.222883	1.16007		16189	b2081	0.130294	0.645198		16189	b2081	0.198081	0.963061
16190	b2082	-0.086852	-0.288695		16190	b2082	-0.254205	-0.69432		16190	b2082	-0.0982812	-0.318995
16193	b2085	-1.0725	-3.13691		16193	b2085	-0.667591	-1.86501		16193	b2085	-1.11758	-3.17342
16194	b2086	-0.162069	-0.923808		16194	b2086	-0.237087	-1.42889		16194	b2086	-0.168631	-0.953212
16198	b2091	0.00861229	0.0414161		16198	b2091	0.0933757	0.491144		16198	b2091	0.137342	0.64284
16199	b2092	-0.0155894	-0.0941073		16199	b2092	0.088021	0.508432		16199	b2092	0.00325793	0.0196476
16200	b2093	0.425228	0.807216		16200	b2093	0.103518	0.243057		16200	b2093	0.322345	0.708198
16201	b2094	0.303401	1.43927		16201	b2094	0.275471	1.40662		16201	b2094	0.257908	1.22321
16202	b2095	-0.140053	-0.6153		16202	b2095	-0.151988	-0.638361		16202	b2095	-0.0123259	-0.0550009
16203	b2096	0.100402	0.487552		16203	b2096	0.109879	0.481858		16203	b2096	-0.116253	-0.377786
16204	b2097	0.200778	0.940544		16204	b2097	0.16377	0.812165		16204	b2097	0.0912927	0.455173
16205	b2098	0.0813959	0.443936		16205	b2098	-0.057606	-0.333951		16205	b2098	-0.0118772	-0.0602448
16206	b2099	-0.368464	-1.42541		16206	b2099	-0.283126	-1.43749		16206	b2099	-0.491884	-2.12401
16207	b2100	-0.0732689	-0.302817		16207	b2100	-0.210359	-1.11023		16207	b2100	-0.0901417	-0.357467
16208	b2101	0.204505	0.898927		16208	b2101	0.246017	0.91181		16208	b2101	0.289057	1.25646
16209	b2102	0.226014	1.07023		16209	b2102	0.267254	1.3234		16209	b2102	0.294814	1.50176
16210	b2103	-0.0504181	-0.216496		16210	b2103	0.00961156	0.0420504		16210	b2103	-0.111473	-0.425846
16211	b2104	0.0178883	0.0552487		16211	b2104	0.235648	0.666471		16211	b2104	-0.0425168	-0.131515
16212	b2105	0.152692	0.489365		16212	b2105	0.075917	0.260571		16212	b2105	0.136659	0.552148
16213	b2106	0.093335	0.467917		16213	b2106	0.0675981	0.367707		16213	b2106	0.100724	0.501785
16214	b2107	0.057609	0.404952		16214	b2107	0.0590762	0.447561		16214	b2107	-0.0588164	-0.401562
16216	b2109	-0.175744	-1.2194		16216	b2109	-0.212024	-1.46749		16216	b2109	-0.193181	-1.2697
16219	b2112	-0.00432603	-0.0255254		16219	b2112	0.00224081	0.0140072		16219	b2112	0.0201663	0.114777
16220	b2113	-0.472016	-1.77167		16220	b2113	-0.497029	-1.91211		16220	b2113	-0.726128	-2.63497
16225	b2118	0.0288296	0.21448		16225	b2118	0.00290655	0.0219733		16225	b2118	0.068483	0.501137
16227	b2119	0.103164	0.529557		16227	b2119	0.0843386	0.391073		16227	b2119	-0.0261352	-0.127198
16228	b2120	-0.0845104	-0.551251		16228	b2120	-0.0441191	-0.284262		16228	b2120	-0.0219888	-0.140626
16229	b2121	0.0865177	0.462876		16229	b2121	-0.0159179	-0.0994769		16229	b2121	0.0311368	0.160695
16230	b2122	0.00357203	0.0206537		16230	b2122	-0.0125694	-0.0728538		16230	b2122	0.0216245	0.12256
16231	b2123	0.763639	2.23217		16231	b2123	0.657782	2.0768		16231	b2123	0.590229	1.85403
16232	b2124	-0.0941707	-0.338302		16232	b2124	-0.039539	-0.182751		16232	b2124	-0.120739	-0.466843
16233	b2125	-0.220683	-1.14573		16233	b2125	-0.296425	-1.55349		16233	b2125	-0.29075	-1.52199
16234	b2126	0.0465222	0.312158		16234	b2126	-0.0179905	-0.117621		16234	b2126	0.0355426	0.217572
16235	b2127	0.0664796	0.338954		16235	b2127	-0.0254657	-0.117885		16235	b2127	0.109713	0.629823
16236	b2128	0.267367	0.793333		16236	b2128	0.17351	0.530789		16236	b2128	0.229747	0.780768
16237	b2129	0.286639	1.65382		16237	b2129	0.289026	1.4379		16237	b2129	0.366993	1.96631
16238	b2130	-0.322499	-1.63341		16238	b2130	-0.30642	-1.53505		16238	b2130	-0.24071	-1.1841
16239	b2131	0.406245	2.04038		16239	b2131	0.232893	1.08442		16239	b2131	0.261762	1.22306
16240	b2132	-0.193869	-1.27097		16240	b2132	-0.0801777	-0.523272		16240	b2132	-0.124778	-0.772243
16241	b2133	0.0519296	0.266072		16241	b2133	0.0997092	0.570766		16241	b2133	0.135655	0.73279
16242	b2134	-0.101098	-0.552377		16242	b2134	-0.126859	-0.808636		16242	b2134	-0.108613	-0.705506
16243	b2135	0.398468	1.85695		16243	b2135	0.424123	2.3946		16243	b2135	0.418642	2.18978
16244	b2136	-0.392816	-1.62518		16244	b2136	-0.400752	-1.52128		16244	b2136	-0.768415	-2.15504
16245	b2137	-0.0971253	-0.416831		16245	b2137	-0.151279	-0.695064		16245	b2137	-0.115713	-0.510801
16248	b2139	-0.0315432	-0.191014		16248	b2139	-0.0123106	-0.081088		16248	b2139	-0.0435832	-0.277475
16249	b2140	-0.134906	-0.793092		16249	b2140	-0.0526806	-0.337716		16249	b2140	-0.115222	-0.601724
16250	b2141	0.824774	2.81216		16250	b2141	0.597113	2.0673		16250	b2141	0.81575	2.51428
16251	b2142	-0.0738679	-0.425883		16251	b2142	0.091431	0.539792		16251	b2142	0.035944	0.210262
16252	b2143	-0.377807	-1.25046		16252	b2143	-0.366034	-1.14738		16252	b2143	-0.502987	-1.62342
16253	b2144	0.0204157	0.133204		16253	b2144	-0.0701535	-0.469833		16253	b2144	-0.0502394	-0.333093
16254	b2145	0.769196	1.862		16254	b2145	0.75196	1.67689		16254	b2145	0.827926	1.66727
16255	b2146	-0.251289	-1.49637		16255	b2146	-0.245837	-1.55558		16255	b2146	-0.274569	-1.60066
16256	b2147	-0.0631144	-0.362171		16256	b2147	-0.109833	-0.657316		16256	b2147	-0.0772744	-0.478959
16257	b2148	0.0266304	0.160047		16257	b2148	0.00115058	0.00664525		16257	b2148	-0.0300061	-0.165463
16258	b2149	-0.263376	-1.37922		16258	b2149	-0.261149	-1.42476		16258	b2149	-0.271054	-1.3465
16259	b2150	-0.100622	-0.343918		16259	b2150	-0.186352	-0.698257		16259	b2150	-0.0398361	-0.128419
16260	b2151	-0.0318358	-0.14082		16260	b2151	0.10553	0.533879		16260	b2151	0.0596867	0.28834
16261	b2152	0.233206	1.0969		16261	b2152	0.303267	1.49993		16261	b2152	0.23369	0.921361
16263	b2154	0.567217	2.8579		16263	b2154	0.373315	1.91185		16263	b2154	0.540851	2.46596
16264	b2155	-0.117818	-0.483031		16264	b2155	-0.0840379	-0.367668		16264	b2155	-0.0528795	-0.222428
16265	b2156	0.0799529	0.50732		16265	b2156	-0.035165	-0.226071		16265	b2156	-0.00820929	-0.0488764
16266	b2157	0.00834455	0.0258818		16266	b2157	0.0827405	0.288326		16266	b2157	0.128802	0.397335
16267	b2158	0.139364	0.916266		16267	b2158	0.0525714	0.331016		16267	b2158	0.149081	0.894026
16268	b2159	0.261331	1.18676		16268	b2159	0.204717	0.955487		16268	b2159	0.248079	1.15169
16269	b2160	0.245375	0.954994		16269	b2160	0.431889	2.03228		16269	b2160	0.40659	1.59567
16270	b2161	-0.023177	-0.108765		16270	b2161	-0.00969995	-0.0467911		16270	b2161	-0.0451647	-0.194214
16271	b2162	-0.086363	-0.424799		16271	b2162	-0.0512179	-0.243496		16271	b2162	0.036507	0.202293
16272	b2163	-0.324293	-0.728581		16272	b2163	-0.263283	-0.678881		16272	b2163	-0.196143	-0.496814
16273	b2164	-0.117905	-0.654375		16273	b2164	-0.0625588	-0.36826		16273	b2164	-0.112911	-0.645879
16274	b2165	-0.218947	-0.642756		16274	b2165	-0.143072	-0.375361		16274	b2165	-0.165726	-0.499321
16275	b2166	-0.0400993	-0.210974		16275	b2166	0.0716182	0.38003		16275	b2166	-0.0219934	-0.110151
16276	b2167	0.243492	1.50547		16276	b2167	0.270795	1.78453		16276	b2167	0.265165	1.70634
16278	b2169	0.251374	1.37157		16278	b2169	0.229973	1.42373		16278	b2169	0.0904604	0.428696
16279	b2170	-0.0302553	-0.153862		16279	b2170	-0.0685327	-0.35308		16279	b2170	-0.12886	-0.66154
16280	b2171	0.0576901	0.312056		16280	b2171	0.000892028	0.00448367		16280	b2171	-0.13674	-0.714459
16281	b2172	0.0905296	0.670906		16281	b2172	0.112437	0.764779		16281	b2172	0.146257	1.04884
16282	b2173	-0.108992	-0.54254		16282	b2173	-0.110189	-0.536692		16282	b2173	-0.185478	-0.855666
16283	b2174	-0.307741	-1.45863		16283	b2174	-0.266701	-1.22573		16283	b2174	-0.410698	-2.05744
16285	b2176	-0.0555483	-0.303921		16285	b2176	0.0394244	0.238534		16285	b2176	-0.00717794	-0.040642
16286	b2177	-0.176578	-1.05631		16286	b2177	-0.214179	-1.28441		16286	b2177	-0.158213	-0.918976
16287	b2178	0.344745	1.48816		16287	b2178	0.249651	1.01755		16287	b2178	0.278721	1.00385
16288	b2179	-0.273926	-1.44708		16288	b2179	-0.147128	-0.772013		16288	b2179	-0.312244	-1.88806
16289	b2180	-0.0991941	-0.573545		16289	b2180	-0.106231	-0.695987		16289	b2180	-0.188324	-1.08271
16290	b2181	0.34121	0.939558		16290	b2181	0.187286	0.509837		16290	b2181	0.162315	0.421088
16291	b2182	-0.0466394	-0.309963		16291	b2182	-0.0323356	-0.194975		16291	b2182	0.000641877	0.00383731
16292	b2183	-0.368018	-1.55102		16292	b2183	-0.188886	-0.60964		16292	b2183	-0.567152	-2.19843
16293	b2184	0.177361	1.03007		16293	b2184	0.236113	1.42965		16293	b2184	0.141516	0.869526
16295	b2186	0.390913	2.51577		16295	b2186	0.437279	2.992		16295	b2186	0.396836	2.43252
16296	b2187	0.0637905	0.203545		16296	b2187	0.24909	0.749566		16296	b2187	0.250732	0.727704
16297	b2188	-0.171541	-0.978664		16297	b2188	-0.289693	-1.7066		16297	b2188	-0.466923	-2.27633
16298	b2190	-0.00430326	-0.0309117		16298	b2190	-0.0526579	-0.393456		16298	b2190	-0.00619797	-0.0438369
16301	b2193	-0.142373	-0.659285		16301	b2193	-0.0962659	-0.408998		16301	b2193	0.0277054	0.117657
16302	b2194	0.0314128	0.170829		16302	b2194	0.0567618	0.344942		16302	b2194	0.0612837	0.310748
16303	b2195	-0.251615	-0.561797		16303	b2195	-0.219318	-0.494032		16303	b2195	-0.255138	-0.445948
16304	b2196	0.109784	0.65844		16304	b2196	0.129138	0.783882		16304	b2196	0.0350775	0.194816
16305	b2197	0.218478	0.734172		16305	b2197	0.236472	0.928628		16305	b2197	0.0454893	0.126112
16306	b2198	-0.0802799	-0.233767		16306	b2198	-0.00847461	-0.0242737		16306	b2198	-0.149703	-0.417305
16307	b2199	0.0678606	0.217707		16307	b2199	0.230879	0.8402		16307	b2199	0.135673	0.419147
16308	b2200	0.163563	0.508863		16308	b2200	0.0631457	0.248401		16308	b2200	-0.00467768	-0.0150475
16309	b2201	-0.204791	-1.01441		16309	b2201	-0.241493	-1.08538		16309	b2201	-0.184858	-0.889793
16310	b2202	0.193084	0.549301		16310	b2202	-0.00777751	-0.0208491		16310	b2202	0.114807	0.368455
16311	b2203	-0.121699	-0.483349		16311	b2203	-0.0165707	-0.0682432		16311	b2203	-0.104007	-0.38836
16312	b2204	-0.00165024	-0.0048343		16312	b2204	-0.0264903	-0.0761711		16312	b2204	0.0811693	0.239841
16313	b2205	0.187167	0.746473		16313	b2205	0.138924	0.637668		16313	b2205	0.110814	0.434857
16314	b2206	-0.126304	-0.810528		16314	b2206	-0.0410247	-0.268878		16314	b2206	-0.00477106	-0.0313737
16315	b2207	0.423501	1.23758		16315	b2207	0.379454	1.25914		16315	b2207	0.35557	0.904963
16316	b2208	-0.453384	-2.1682		16316	b2208	-0.426948	-1.77411		16316	b2208	-0.363384	-1.76211
16318	b2210	0.282693	1.77609		16318	b2210	0.131863	0.880048		16318	b2210	0.299116	1.86363
16319	b2211	0.185515	1.10834		16319	b2211	0.148686	0.950274		16319	b2211	0.185116	1.05194
16320	b2212	0.2202	0.903625		16320	b2212	0.159626	0.666117		16320	b2212	0.234611	1.12886
16321	b2213	0.479905	1.35131		16321	b2213	0.461461	1.34466		16321	b2213	0.27924	0.656466
16322	b2214	0.00907573	0.0391201		16322	b2214	-0.033244	-0.159743		16322	b2214	0.0887008	0.370583
16323	b2215	-0.744023	-2.50483		16323	b2215	-0.598434	-1.89345		16323	b2215	-0.614149	-1.97074
16324	b2216	-0.702048	-4.76075		16324	b2216	-0.352651	-2.32826		16324	b2216	-0.368008	-2.39491
16325	b2217	0.0161332	0.0900278		16325	b2217	0.121313	0.670131		16325	b2217	0.0328173	0.171462
16326	b2218	-0.329811	-2.28475		16326	b2218	-0.164711	-1.22423		16326	b2218	-0.13929	-0.954595
16327	b2219	-0.128783	-0.913286		16327	b2219	-0.181151	-1.28675		16327	b2219	-0.0733916	-0.488168
16328	b2220	-0.0138174	-0.0851816		16328	b2220	-0.0809301	-0.545025		16328	b2220	0.0241462	0.155134
16329	b2221	-0.139925	-0.319345		16329	b2221	0.0714722	0.183831		16329	b2221	-0.0205692	-0.051733
16330	b2222	-0.0245738	-0.0837048		16330	b2222	-0.182776	-0.697107		16330	b2222	0.0117617	0.0431559
16331	b2223	0.0400603	0.251529		16331	b2223	0.027975	0.174703		16331	b2223	0.05301	0.316068
16332	b2224	0.0714342	0.410481		16332	b2224	0.152796	0.732545		16332	b2224	0.117316	0.699604
16333	b2225	0.0557501	0.263978		16333	b2225	0.0544316	0.282725		16333	b2225	0.11905	0.49905
16334	b2226	-0.00432603	-0.0287277		16334	b2226	-0.0509446	-0.334405		16334	b2226	-0.05998	-0.405192
16336	b2229	0.384295	1.4117		16336	b2229	0.458353	1.74233		16336	b2229	0.542205	1.66728
16337	b2230	0.0293639	0.170728		16337	b2230	0.0671236	0.419636		16337	b2230	0.00821758	0.0434288
16340	b2233	-0.074831	-0.540606		16340	b2233	-0.055598	-0.399557		16340	b2233	-0.0943604	-0.68511
16343	b2236	0.680794	2.13168		16343	b2236	0.57115	1.78806		16343	b2236	1.01999	4.46159
16344	b2237	-0.193847	-0.671791		16344	b2237	-0.5862	-2.07275		16344	b2237	-0.0515045	-0.17442
16346	b2239	-0.0591701	-0.310401		16346	b2239	-0.14085	-0.777643		16346	b2239	-0.0354165	-0.165987
16347	b2240	0.119783	0.718438		16347	b2240	0.159442	1.0281		16347	b2240	0.169662	1.03968
16348	b2241	-0.0608793	-0.478964		16348	b2241	-0.120463	-0.937556		16348	b2241	-0.0538005	-0.404735
16349	b2242	0.144263	0.813264		16349	b2242	0.139023	0.667133		16349	b2242	0.0790108	0.414682
16350	b2243	0.304449	1.35894		16350	b2243	0.228238	1.07907		16350	b2243	0.275232	1.27702
16351	b2244	-0.0770832	-0.407975		16351	b2244	-0.0801046	-0.450218		16351	b2244	-0.139745	-0.680453
16352	b2245	-0.0847995	-0.45996		16352	b2245	0.0213386	0.118999		16352	b2245	-0.12819	-0.661167
16353	b2246	0.0973988	0.520913		16353	b2246	0.0587697	0.323104		16353	b2246	-0.0528226	-0.232019
16354	b2247	0.103102	0.594037		16354	b2247	0.0887735	0.541032		16354	b2247	0.16989	0.970902
16356	b2249	0.0935322	0.511939		16356	b2249	-0.0779192	-0.445412		16356	b2249	0.122248	0.687499
16357	b2250	-0.399976	-1.56845		16357	b2250	-0.471284	-1.5766		16357	b2250	-0.390495	-1.1398
16358	b2251	-0.0655877	-0.210856		16358	b2251	0.0615685	0.209773		16358	b2251	0.0653048	0.176303
16360	b2253	0.125115	0.826265		16360	b2253	0.109699	0.70124		16360	b2253	0.0712655	0.371407
16361	b2254	-0.0829566	-0.471031		16361	b2254	-0.071097	-0.454957		16361	b2254	-0.0762278	-0.446398
16362	b2255	0.118974	0.784103		16362	b2255	0.164387	1.11453		16362	b2255	0.160343	1.0291
16363	b2256	0.00226822	0.0130528		16363	b2256	-0.0642474	-0.401271		16363	b2256	-0.074403	-0.419442
16364	b2257	-0.148404	-0.860447		16364	b2257	-0.361168	-2.36012		16364	b2257	-0.357456	-2.2921
16367	b2260	-0.00800109	-0.061308		16367	b2260	0.137511	1.00914		16367	b2260	0.0498383	0.353494
16368	b2261	-0.138768	-0.604626		16368	b2261	-0.212908	-0.88211		16368	b2261	-0.158367	-0.690594
16369	b2262	0.414803	1.30453		16369	b2262	0.728246	2.61939		16369	b2262	0.527008	1.7524
16370	b2263	-0.362771	-1.36375		16370	b2263	-0.316102	-1.04334		16370	b2263	-0.24091	-0.939771
16371	b2264	-0.210441	-0.958814		16371	b2264	-0.261794	-1.05175		16371	b2264	-0.0573198	-0.251795
16372	b2265	0.320972	2.34742		16372	b2265	0.268482	1.72424		16372	b2265	0.301421	2.1776
16373	b2266	-0.1101	-0.553347		16373	b2266	-0.194759	-0.853133		16373	b2266	-0.280514	-1.08995
16374	b2267	0.223487	0.764029		16374	b2267	0.126049	0.652887		16374	b2267	0.201908	0.773015
16375	b2268	-0.141166	-0.81003		16375	b2268	-0.0460935	-0.257269		16375	b2268	-0.0689731	-0.347982
16377	b2270	-0.139691	-0.974592		16377	b2270	-0.206239	-1.49177		16377	b2270	-0.265114	-1.73765
16378	b2271	-0.36747	-1.38704		16378	b2271	-0.580297	-2.58675		16378	b2271	-0.513375	-2.1596
16381	b2274	-0.0632372	-0.160947		16381	b2274	-0.0135367	-0.0309789		16381	b2274	-0.0896021	-0.208162
16382	b2275	-0.14124	-0.632456		16382	b2275	-0.293013	-1.41584		16382	b2275	-0.216317	-0.930494
16385	b2278	-0.987493	-3.23177		16385	b2278	-0.964745	-3.31064		16385	b2278	-1.44366	-5.26663
16390	b2283	-0.342911	-1.1789		16390	b2283	-0.715181	-1.91222		16390	b2283	-0.724345	-2.06178
16393	b2286	-0.849503	-2.63544		16393	b2286	-0.800526	-1.81321		16393	b2286	-1.11302	-2.68978
16396	b2289	-1.13719	-9.00947		16396	b2289	-1.29814	-8.94444		16396	b2289	-1.16707	-7.868
16397	b2290	-0.0158876	-0.102266		16397	b2290	-0.0297187	-0.195717		16397	b2290	-0.0392605	-0.245659
16398	b2291	0.460614	0.939495		16398	b2291	0.386255	0.896643		16398	b2291	0.530732	1.3958
16399	b2292	-0.112619	-0.627363		16399	b2292	0.0664024	0.415672		16399	b2292	-0.103592	-0.566849
16400	b2293	0.442291	1.31685		16400	b2293	0.0688453	0.232937		16400	b2293	0.351898	1.10373
16401	b2294	0.263308	1.05525		16401	b2294	0.268243	1.26493		16401	b2294	0.237494	1.15739
16402	b2295	-0.128433	-0.633898		16402	b2295	-0.175381	-0.883362		16402	b2295	-0.134103	-0.642647
16405	b2298	0.115353	0.599626		16405	b2298	0.129414	0.647509		16405	b2298	0.131351	0.721901
16406	b2299	0.172182	0.722999		16406	b2299	0.132129	0.558191		16406	b2299	0.202237	0.922805
16407	b2300	-0.107811	-0.344922		16407	b2300	-0.194932	-0.733879		16407	b2300	-0.159864	-0.502679
16408	b2301	0.33523	1.19625		16408	b2301	0.5359	1.8467		16408	b2301	0.609324	2.13527
16409	b2302	0.0544433	0.294401		16409	b2302	0.0874021	0.494862		16409	b2302	0.146929	0.838021
16410	b2303	0.131225	0.79		16410	b2303	0.273281	1.89771		16410	b2303	0.209967	1.34363
16411	b2304	0.175339	0.992593		16411	b2304	0.268496	1.47289		16411	b2304	0.209658	1.13326
16412	b2305	-0.142854	-0.829619		16412	b2305	-0.186883	-1.04455		16412	b2305	-0.145295	-0.783982
16413	b2306	0.140062	0.641425		16413	b2306	0.0521969	0.237894		16413	b2306	0.231528	1.05643
16414	b2307	0.191364	1.04397		16414	b2307	0.213442	1.20148		16414	b2307	0.177806	0.952362
16415	b2308	-0.0599899	-0.322701		16415	b2308	0.0483533	0.263592		16415	b2308	-0.117927	-0.649847
16416	b2309	-0.424032	-1.81426		16416	b2309	-0.209438	-0.980645		16416	b2309	-0.316797	-1.51827
16417	b2310	0.00728999	0.036918		16417	b2310	0.0850316	0.439441		16417	b2310	-0.00624503	-0.0397959
16419	b2312	-1.15406	-3.52124		16419	b2312	-1.58956	-3.32333		16419	b2312	-1.27701	-3.60062
16420	b2313	-0.0846039	-0.18284		16420	b2313	-0.402833	-0.771251		16420	b2313	-0.850394	-1.80594
16421	b2314	0.115077	0.429374		16421	b2314	-0.0441623	-0.159942		16421	b2314	-0.0698016	-0.24272
16424	b2317	-0.0924542	-0.273089		16424	b2317	0.230632	0.761554		16424	b2317	0.151846	0.47565
16426	b2319	-0.206145	-0.74596		16426	b2319	-0.373665	-1.46752		16426	b2319	-0.43721	-1.60302
16427	b2320	-0.0710917	-0.297007		16427	b2320	-0.00523588	-0.0242086		16427	b2320	0.0502221	0.203965
16428	b2321	0.1511	0.840143		16428	b2321	0.11433	0.602887		16428	b2321	0.048306	0.237536
16429	b2322	0.198471	1.04379		16429	b2322	0.238171	1.42121		16429	b2322	0.158691	0.774293
16431	b2324	-0.0504168	-0.329824		16431	b2324	-0.14836	-0.933214		16431	b2324	-0.182929	-1.12829
16432	b2325	-0.282083	-1.18916		16432	b2325	-0.389605	-1.56443		16432	b2325	-0.178519	-0.735796
16433	b2326	0.400424	1.83188		16433	b2326	0.430606	2.29202		16433	b2326	0.362071	2.15108
16434	b2327	-0.00510399	-0.0238445		16434	b2327	0.107643	0.590902		16434	b2327	-0.128051	-0.651378
16435	b2328	-0.0489346	-0.281055		16435	b2328	0.107054	0.727575		16435	b2328	0.0581469	0.324741
16438	b2331	0.224773	0.769648		16438	b2331	0.131534	0.460671		16438	b2331	0.206358	0.600629
16439	b2332	-0.158031	-1.05818		16439	b2332	-0.0797364	-0.519844		16439	b2332	-0.06743	-0.414422
16440	b2333	-0.0270761	-0.188979		16440	b2333	0.00226735	0.0150576		16440	b2333	-0.0508147	-0.33027
16441	b2334	0.233212	1.16648		16441	b2334	0.166956	0.97968		16441	b2334	0.0251346	0.123843
16442	b2335	0.127813	0.780072		16442	b2335	0.11234	0.7023		16442	b2335	0.112421	0.631895
16443	b2336	0.0727828	0.282013		16443	b2336	0.0814299	0.324039		16443	b2336	0.255673	1.05095
16445	b2339	0.0582035	0.224558		16445	b2339	0.126633	0.476549		16445	b2339	0.103207	0.440454
16446	b2340	-1.62284	-4.93906		16446	b2340	-1.8613	-4.01737		16446	b2340	-1.90596	-4.94022
16447	b2341	0.281977	1.73665		16447	b2341	0.203655	1.32785		16447	b2341	0.241772	1.46731
16448	b2342	0.199761	1.06339		16448	b2342	0.278791	1.64017		16448	b2342	0.12743	0.732291
16450	b2344	-0.0246966	-0.120334		16450	b2344	-0.112699	-0.652797		16450	b2344	-0.156143	-0.8143
16452	b2346	-0.0453372	-0.263718		16452	b2346	0.06904	0.452217		16452	b2346	0.0127513	0.0697596
16453	b2347	0.128106	0.72932		16453	b2347	0.158824	0.96257		16453	b2347	0.0238385	0.138192
16454	b2349	-0.338655	-1.53823		16454	b2349	-0.213394	-1.13896		16454	b2349	-0.239761	-1.01311
16455	b2350	-0.0126148	-0.0566923		16455	b2350	0.0579046	0.261744		16455	b2350	-0.143686	-0.618223
16456	b2351	-0.256092	-1.91302		16456	b2351	-0.183808	-1.39612		16456	b2351	-0.260387	-1.90169
16458	b2353	0.0111272	0.0745823		16458	b2353	0.0921632	0.660955		16458	b2353	-0.0220407	-0.15778
16459	b2354	-0.193726	-0.742507		16459	b2354	-0.323981	-1.26292		16459	b2354	-0.336353	-1.33923
16460	b2355	-0.0721783	-0.470932		16460	b2355	-0.0904749	-0.611913		16460	b2355	-0.190733	-1.24758
16461	b2356	-0.0103553	-0.0288277		16461	b2356	-0.13898	-0.275825		16461	b2356	-0.0694063	-0.186653
16462	b2357	-0.423753	-1.4099		16462	b2357	-0.0643396	-0.228388		16462	b2357	-0.301258	-1.03595
16463	b2358	0.0783117	0.466968		16463	b2358	0.125848	0.748496		16463	b2358	0.051288	0.235774
16464	b2359	0.226655	0.83766		16464	b2359	0.267217	1.00839		16464	b2359	0.339077	1.39233
16465	b2360	-0.0319142	-0.181333		16465	b2360	-0.0842653	-0.482983		16465	b2360	-0.12309	-0.67472
16466	b2361	-0.010338	-0.0678004		16466	b2361	0.0137407	0.0883805		16466	b2361	0.0337784	0.21264
16467	b2362	-0.300275	-1.22423		16467	b2362	-0.305879	-0.934108		16467	b2362	-0.386327	-1.27755
16469	b2364	-0.014728	-0.0666922		16469	b2364	-0.0224547	-0.123532		16469	b2364	-0.0124561	-0.0547781
16470	b2365	0.0955225	0.56502		16470	b2365	0.152093	0.953524		16470	b2365	0.167802	1.02421
16471	b2366	-0.552226	-2.17396		16471	b2366	-0.615516	-2.19713		16471	b2366	-0.558522	-2.15714
16472	b2367	-0.452046	-2.01647		16472	b2367	-0.398393	-1.72971		16472	b2367	-0.423659	-1.968
16473	b2368	-0.360846	-2.16331		16473	b2368	-0.0742883	-0.451038		16473	b2368	-0.181873	-1.12382
16475	b2370	-0.277323	-1.70142		16475	b2370	-0.266392	-1.67941		16475	b2370	-0.263011	-1.63654
16476	b2371	0.0418915	0.255971		16476	b2371	-0.224455	-1.18367		16476	b2371	-0.149327	-0.804202
16477	b2372	-0.677483	-2.73547		16477	b2372	-0.702318	-3.23479		16477	b2372	-0.579832	-2.33878
16478	b2373	-0.202497	-1.41297		16478	b2373	-0.223653	-1.55535		16478	b2373	-0.247301	-1.72804
16479	b2374	-0.140661	-0.883644		16479	b2374	-0.0758516	-0.491275		16479	b2374	-0.160606	-0.961563
16482	b2377	-0.302892	-0.446658		16482	b2377	-0.188626	-0.335588		16482	b2377	-0.058953	-0.0922626
16483	b2378	0.0541211	0.234039		16483	b2378	0.0564027	0.253345		16483	b2378	0.0963988	0.394363
16484	b2379	0.0789885	0.402302		16484	b2379	0.072337	0.386146		16484	b2379	0.0659784	0.305613
16485	b2380	-0.117754	-0.639924		16485	b2380	-0.0113477	-0.0735043		16485	b2380	-0.0962405	-0.535882
16486	b2381	0.243004	0.929566		16486	b2381	0.0496758	0.198894		16486	b2381	0.0961973	0.378218
16487	b2382	0.177236	1.05467		16487	b2382	0.0516141	0.309568		16487	b2382	0.0971471	0.537886
16488	b2383	0.00391364	0.0251731		16488	b2383	0.0458739	0.307316		16488	b2383	0.0303234	0.189075
16489	b2384	-0.211403	-1.13736		16489	b2384	-0.141542	-0.795017		16489	b2384	-0.208161	-0.976213
16490	b2385	0.377285	1.93454		16490	b2385	0.36269	2.02316		16490	b2385	0.380686	1.65205
16491	b2386	0.00231849	0.014695		16491	b2386	-0.00632222	-0.0389235		16491	b2386	0.107171	0.704632
16492	b2387	0.187452	0.728135		16492	b2387	0.176762	0.624353		16492	b2387	0.151076	0.48535
16493	b2388	-0.0554819	-0.283636		16493	b2388	-0.0435628	-0.236969		16493	b2388	-0.0656183	-0.314074
16494	b2389	0.244703	1.80703		16494	b2389	0.198242	1.27403		16494	b2389	0.220621	1.61313
16495	b2390	0.0104997	0.0374792		16495	b2390	-0.108034	-0.407673		16495	b2390	0.0167187	0.0591336
16497	b2392	-0.347708	-1.77062		16497	b2392	-0.592967	-2.80193		16497	b2392	-0.205937	-0.978503
16498	b2393	0.124339	0.666514		16498	b2393	0.100102	0.503568		16498	b2393	0.151679	0.735188
16500	b2395	0.0130743	0.0917777		16500	b2395	0.0311524	0.230093		16500	b2395	-0.00132953	-0.00854048
16501	b2398	0.162648	0.513304		16501	b2398	0.0979362	0.347573		16501	b2398	0.366454	1.23525
16502	b2399	-0.284745	-1.25209		16502	b2399	-0.344531	-1.3146		16502	b2399	-0.279767	-1.13594
16504	b2405	-0.117619	-0.708949		16504	b2405	-0.109291	-0.671651		16504	b2405	-0.011623	-0.0694869
16505	b2406	-0.0410454	-0.270381		16505	b2406	-0.031644	-0.215432		16505	b2406	-0.0328907	-0.212094
16506	b2407	0.097953	0.55191		16506	b2407	0.224209	1.1788		16506	b2407	0.179638	1.02359
16507	b2408	0.161618	1.12577		16507	b2408	0.224028	1.5807		16507	b2408	0.264943	1.65758
16508	b2409	0.101423	0.430218		16508	b2409	0.172182	0.752487		16508	b2409	0.105139	0.383094
16509	b2410	0.0229683	0.0915816		16509	b2410	-0.0849315	-0.324715		16509	b2410	0.0224561	0.094708
16512	b2413	0.057426	0.323292		16512	b2413	0.0456452	0.223936		16512	b2413	0.128047	0.680348
16513	b2414	-1.5177	-7.8612		16513	b2414	-1.71057	-8.44131		16513	b2414	-1.60101	-8.06242
16517	b2418	-0.235544	-1.22688		16517	b2418	-0.249614	-1.24682		16517	b2418	-0.279934	-1.33826
16518	b2419	-0.119837	-0.338987		16518	b2419	-0.276572	-0.752493		16518	b2419	0.0685041	0.186668
16519	b2420	0.147787	0.530569		16519	b2420	0.114408	0.420975		16519	b2420	0.180986	0.669741
16520	b2421	-0.611124	-1.60304		16520	b2421	-0.442683	-1.36672		16520	b2421	-0.804186	-2.42705
16521	b2422	-0.22656	-1.16429		16521	b2422	-0.26991	-1.28224		16521	b2422	-0.327647	-1.45458
16524	b2425	0.0920632	0.523819		16524	b2425	0.0800866	0.494644		16524	b2425	-0.0852772	-0.473842
16526	b2427	-0.159736	-0.803264		16526	b2427	-0.0743777	-0.377549		16526	b2427	-0.0401849	-0.21548
16527	b2428	0.0343772	0.135937		16527	b2428	-0.125934	-0.412078		16527	b2428	0.116603	0.451027
16528	b2429	-0.101473	-0.561367		16528	b2429	0.0571692	0.331972		16528	b2429	0.0253757	0.133092
16529	b2430	0.173056	0.998758		16529	b2430	0.110233	0.611454		16529	b2430	0.218022	1.35704
16530	b2431	-0.0606938	-0.304275		16530	b2431	-0.0390141	-0.200899		16530	b2431	-0.210682	-0.971548
16533	b2434	0.192268	0.808342		16533	b2434	0.133622	0.60971		16533	b2434	0.293241	1.04743
16534	b2435	-0.827161	-4.57497		16534	b2435	-0.809892	-3.02584		16534	b2435	-0.532387	-2.64842
16535	b2436	0.0811893	0.359889		16535	b2436	-0.0362852	-0.18665		16535	b2436	-0.0360425	-0.148277
16536	b2437	0.150612	0.706953		16536	b2437	0.0822628	0.382377		16536	b2437	0.232051	1.24856
16537	b2438	-0.00255758	-0.010921		16537	b2438	-0.066312	-0.27626		16537	b2438	0.00393456	0.015037
16538	b2439	0.0956468	0.424374		16538	b2439	0.0147639	0.0713966		16538	b2439	-0.116618	-0.644768
16539	b2440	0.110396	0.521427		16539	b2440	0.27487	1.41235		16539	b2440	0.181703	1.02233
16540	b2441	0.304502	1.7239		16540	b2441	0.310111	1.82605		16540	b2441	0.469671	2.49358
16541	b2442	0.0636251	0.14467		16541	b2442	0.00276658	0.00783268		16541	b2442	0.0345204	0.0940388
16542	b2443	0.164159	0.46928		16542	b2443	0.195063	0.682179		16542	b2443	0.219379	0.656414
16544	b2445	-0.13093	-0.298054		16544	b2445	0.00260482	0.00697862		16544	b2445	-0.043367	-0.0987529
16546	b2447	0.0426698	0.208576		16546	b2447	0.0305431	0.139073		16546	b2447	0.00450159	0.0189226
16547	b2448	-0.22434	-0.525608		16547	b2448	-0.191902	-0.527972		16547	b2448	-0.111731	-0.289117
16548	b2449	-0.25049	-1.21456		16548	b2449	-0.398721	-2.06954		16548	b2449	-0.185313	-0.739866
16550	b2451	0.149854	0.739259		16550	b2451	0.0846478	0.460226		16550	b2451	-0.00550831	-0.0271011
16551	b2452	-0.0713959	-0.435177		16551	b2452	-0.0979878	-0.632059		16551	b2452	-0.0364977	-0.208101
16552	b2453	-0.269596	-1.40475		16552	b2453	-0.0988471	-0.581948		16552	b2453	-0.248307	-1.40122
16553	b2454	-0.091062	-0.44331		16553	b2454	-0.181975	-1.00157		16553	b2454	-0.046119	-0.215666
16554	b2455	-0.0262577	-0.133246		16554	b2455	-0.0887429	-0.451679		16554	b2455	0.0770091	0.318793
16555	b2456	0.373899	1.34224		16555	b2456	0.261018	1.14899		16555	b2456	0.179091	0.729025
16556	b2457	0.0911422	0.346894		16556	b2457	0.231664	0.899184		16556	b2457	-0.0316906	-0.0926441
16557	b2458	0.0417234	0.201115		16557	b2458	0.138368	0.719224		16557	b2458	0.202712	1.24723
16558	b2459	0.606417	2.56799		16558	b2459	0.589286	2.93481		16558	b2459	0.450299	2.6317
16559	b2460	0.0409548	0.211216		16559	b2460	0.0102886	0.0554862		16559	b2460	0.0292906	0.12652
16560	b2461	0.0178979	0.114149		16560	b2461	0.0028275	0.0196816		16560	b2461	0.0985309	0.673496
16561	b2462	-0.011139	-0.0692028		16561	b2462	0.0112783	0.0538323		16561	b2462	-0.193413	-0.897158
16562	b2463	0.216841	1.28812		16562	b2463	0.109991	0.703444		16562	b2463	0.32011	1.8853
16563	b2464	0.0157263	0.0803218		16563	b2464	-0.0730728	-0.402864		16563	b2464	0.0282349	0.155978
16564	b2465	0.0708346	0.379786		16564	b2465	0.0373951	0.225115		16564	b2465	0.0613606	0.343736
16565	b2466	-0.54338	-2.94684		16565	b2466	-0.574816	-3.62316		16565	b2466	-0.584634	-3.16764
16566	b2467	0.0393168	0.198015		16566	b2467	0.11305	0.559127		16566	b2467	-0.0349766	-0.169409
16567	b2468	0.120742	0.578088		16567	b2468	0.175974	0.79523		16567	b2468	0.159965	0.776379
16568	b2469	-0.177567	-1.11069		16568	b2469	-0.101507	-0.701354		16568	b2469	-0.159921	-0.866233
16569	b2470	-0.00704364	-0.0541797		16569	b2470	-0.0544996	-0.408328		16569	b2470	-0.0734959	-0.520738
16570	b2471	-0.0184047	-0.0597421		16570	b2471	-0.0989797	-0.355477		16570	b2471	-0.188042	-0.685237
16572	b2473	0.0927514	0.41753		16572	b2473	0.151302	0.641943		16572	b2473	0.106432	0.465934
16573	b2474	0.0997424	0.648632		16573	b2474	0.044585	0.292346		16573	b2474	7.31104e-05	0.000483061
16574	b2475	-0.170982	-0.891484		16574	b2475	-0.27728	-1.38836		16574	b2475	-0.047013	-0.22643
16576	b2477	0.121238	0.425034		16576	b2477	0.0919682	0.355373		16576	b2477	-0.00280899	-0.00908403
16578	b2479	-1.83533	-6.43088		16578	b2479	-1.9605	-7.46771		16578	b2479	-2.46154	-8.32765
16579	b2480	-0.084214	-0.324571		16579	b2480	-0.107686	-0.45259		16579	b2480	-0.306717	-1.42563
16580	b2481	-0.0258943	-0.0806897		16580	b2481	-0.102133	-0.323305		16580	b2481	-0.400997	-1.11644
16581	b2482	0.0238998	0.157993		16581	b2482	-0.0378892	-0.236446		16581	b2482	-0.00533631	-0.0340485
16582	b2483	0.0315342	0.166146		16582	b2483	0.0401354	0.191745		16582	b2483	0.0601551	0.283095
16583	b2484	-0.0256702	-0.133484		16583	b2484	-0.0644377	-0.353914		16583	b2484	-0.112974	-0.540308
16584	b2485	-0.161431	-0.899583		16584	b2485	-0.250293	-1.00497		16584	b2485	-0.1191	-0.486641
16585	b2486	0.106618	0.448444		16585	b2486	0.0835337	0.379444		16585	b2486	0.0152062	0.063411
16586	b2487	-0.180638	-1.09187		16586	b2487	-0.191604	-1.15467		16586	b2487	-0.318976	-1.85517
16587	b2488	0.17833	0.407677		16587	b2488	0.114938	0.31995		16587	b2488	0.100996	0.227325
16588	b2489	0.466995	2.71134		16588	b2489	0.354387	1.77687		16588	b2489	0.260968	1.17653
16589	b2490	0.265424	0.625838		16589	b2490	-0.215845	-0.410722		16589	b2490	-0.0891564	-0.177841
16590	b2491	0.183627	0.973472		16590	b2491	0.14388	0.685904		16590	b2491	0.107962	0.584305
16591	b2492	0.251162	1.15984		16591	b2492	0.201448	0.957485		16591	b2492	0.287125	1.11146
16592	b2493	0.0773877	0.430959		16592	b2493	-0.220443	-1.03402		16592	b2493	0.0752305	0.436641
16593	b2494	0.30965	1.57516		16593	b2494	0.216297	1.02094		16593	b2494	0.216763	1.14662
16594	b2495	-0.00812227	-0.0278418		16594	b2495	0.111433	0.481019		16594	b2495	0.0279523	0.121867
16596	b2497	-0.195866	-1.01454		16596	b2497	-0.1246	-0.759455		16596	b2497	-0.264783	-1.26939
16598	b2499	-0.465544	-1.29861		16598	b2499	-0.789855	-2.50234		16598	b2499	-1.10594	-3.41715
16599	b2500	0.414108	1.09793		16599	b2500	0.270848	0.861909		16599	b2500	0.262435	0.671346
16600	b2501	-1.08615	-3.80011		16600	b2501	-1.33835	-4.61223		16600	b2501	-1.17244	-4.0417
16601	b2502	-0.691583	-4.76026		16601	b2502	-0.736549	-5.38215		16601	b2502	-0.555808	-3.42908
16602	b2503	0.12175	0.607359		16602	b2503	0.116136	0.601564		16602	b2503	0.116858	0.535588
16604	b2505	0.0229488	0.103367		16604	b2505	-0.152596	-0.640172		16604	b2505	0.0827288	0.360311
16608	b2509	0.249837	1.18759		16608	b2509	0.27579	1.4163		16608	b2509	0.220539	1.01612
16609	b2510	-0.132866	-0.38999		16609	b2510	-0.242155	-0.651324		16609	b2510	0.0364694	0.103602
16611	b2512	-0.034122	-0.147281		16611	b2512	-0.112794	-0.43937		16611	b2512	-0.733885	-2.77779
16612	b2513	-0.0643035	-0.266443		16612	b2513	-0.116171	-0.464402		16612	b2513	0.0289921	0.140704
16615	b2516	0.234235	1.10149		16615	b2516	0.199214	1.12071		16615	b2516	0.287418	1.46342
16616	b2517	0.131533	0.778652		16616	b2517	0.121671	0.642189		16616	b2517	0.115156	0.616434
16618	b2519	-0.0173624	-0.122601		16618	b2519	0.000854402	0.00587839		16618	b2519	-0.0145775	-0.0916488
16619	b2520	0.0834661	0.637438		16619	b2520	0.0760723	0.606383		16619	b2520	0.0823267	0.637903
16620	b2521	-0.262336	-1.41259		16620	b2521	-0.202179	-1.07227		16620	b2521	-0.25107	-1.27967
16621	b2522	0.115992	0.87653		16621	b2522	0.0426346	0.328962		16621	b2522	-0.0223194	-0.169422
16622	b2523	-0.428782	-1.86952		16622	b2523	-0.380526	-1.55809		16622	b2523	-0.373379	-1.75759
16631	b2532	-0.0912323	-0.348271		16631	b2532	-0.249413	-0.894002		16631	b2532	0.0834581	0.273326
16633	b2534	0.117614	0.687493		16633	b2534	0.0319788	0.174718		16633	b2534	0.122338	0.72242
16634	b2535	-0.00432603	-0.0309773		16634	b2535	0.0277727	0.204563		16634	b2535	-0.00989888	-0.0660177
16635	b2536	0.108422	0.589631		16635	b2536	0.0787327	0.382026		16635	b2536	0.0924562	0.494526
16636	b2537	-0.0438225	-0.246517		16636	b2537	0.0247211	0.153426		16636	b2537	0.0326028	0.189924
16637	b2538	-0.114787	-0.581388		16637	b2538	-0.0142491	-0.0728519		16637	b2538	-0.102849	-0.545616
16638	b2539	0.249392	0.767528		16638	b2539	0.307528	0.93425		16638	b2539	0.464141	1.42253
16639	b2540	-0.344551	-1.1727		16639	b2540	-0.156249	-0.522801		16639	b2540	-0.244556	-0.816307
16640	b2541	-0.690941	-2.61187		16640	b2541	-0.281833	-1.18993		16640	b2541	-0.486295	-1.99101
16641	b2542	0.19857	0.92023		16641	b2542	0.175443	0.884985		16641	b2542	0.192094	0.94604
16642	b2543	-0.0183091	-0.0767547		16642	b2543	0.0083661	0.0458444		16642	b2543	0.00703708	0.0337261
16643	b2544	-0.0607738	-0.286873		16643	b2544	-0.0728339	-0.372056		16643	b2544	-0.171316	-0.852999
16644	b2545	-0.195696	-0.950037		16644	b2545	-0.130833	-0.754604		16644	b2545	-0.180636	-0.738273
16645	b2546	0.166156	0.742605		16645	b2546	0.109183	0.471869		16645	b2546	0.200675	0.93022
16646	b2547	-0.0164314	-0.0861575		16646	b2547	-0.104254	-0.566917		16646	b2547	-0.0271101	-0.108622
16647	b2548	-0.369346	-2.01021		16647	b2548	-0.437503	-2.77891		16647	b2548	-0.381789	-2.2559
16648	b2549	0.254244	1.8539		16648	b2549	0.17995	1.30648		16648	b2549	0.204035	1.43187
16649	b2550	0.239263	1.29486		16649	b2550	0.172088	0.994888		16649	b2550	0.174066	0.952263
16651	b2552	0.0951194	0.628763		16651	b2552	0.0989031	0.648038		16651	b2552	0.118262	0.762691
16652	b2553	-0.211461	-0.765854		16652	b2553	-0.765731	-2.65205		16652	b2553	-0.201321	-0.717312
16653	b2554	0.15828	0.999022		16653	b2554	0.0813593	0.461761		16653	b2554	0.235109	1.5491
16654	b2555	0.297749	1.42889		16654	b2555	0.286067	1.57524		16654	b2555	0.326976	1.55552
16655	b2556	0.211752	1.20913		16655	b2556	0.202268	1.17786		16655	b2556	0.335411	2.00005
16657	b2558	-0.0841898	-0.572155		16657	b2558	-0.049388	-0.360136		16657	b2558	0.0210386	0.150746
16659	b2560	0.135423	0.565727		16659	b2560	0.179529	0.798536		16659	b2560	0.174358	0.671949
16660	b2561	0.125461	0.68817		16660	b2561	0.111223	0.670829		16660	b2561	0.224175	1.42004
16661	b2562	-0.301735	-1.52434		16661	b2562	-0.0960903	-0.487963		16661	b2562	-0.184421	-0.873374
16663	b2564	0.272186	0.729178		16663	b2564	0.33286	1.30328		16663	b2564	0.536908	1.67388
16664	b2565	0.17384	0.868581		16664	b2565	0.119803	0.604203		16664	b2565	0.244429	1.21341
16669	b2570	0.136358	0.544729		16669	b2570	0.0193797	0.0758038		16669	b2570	0.00697137	0.0255649
16670	b2571	-0.041325	-0.188225		16670	b2571	-0.0891658	-0.488554		16670	b2571	-0.546287	-2.70043
16671	b2572	0.31639	1.14764		16671	b2572	0.284954	1.26066		16671	b2572	0.191751	0.648911
16673	b2574	-0.0226646	-0.151516		16673	b2574	-0.0143635	-0.0905177		16673	b2574	-0.0102553	-0.0633911
16674	b2575	-0.120682	-0.652894		16674	b2575	-0.132337	-0.639034		16674	b2575	-0.128037	-0.640694
16676	b2577	-0.338996	-1.19128		16676	b2577	-0.329363	-1.24613		16676	b2577	-0.356073	-1.2904
16677	b2578	-0.102795	-0.513477		16677	b2578	-0.214377	-0.960715		16677	b2578	-0.103206	-0.472592
16679	b2580	-0.0956181	-0.433878		16679	b2580	0.0788276	0.349967		16679	b2580	-0.0160803	-0.07388
16680	b2581	-0.158739	-1.04251		16680	b2581	-0.103801	-0.691358		16680	b2581	-0.0593185	-0.394866
16681	b2582	-0.223447	-0.341118		16681	b2582	-0.00522043	-0.00832139		16681	b2582	-0.107561	-0.159995
16682	b2583	-0.202092	-1.07151		16682	b2583	-0.335165	-1.70436		16682	b2583	-0.416413	-2.09791
16683	b2584	-0.0333384	-0.254703		16683	b2584	-0.00116694	-0.00914713		16683	b2584	0.0607157	0.438379
16685	b2586	-0.694246	-2.49067		16685	b2586	-0.510302	-1.99394		16685	b2586	-0.324585	-1.40428
16686	b2587	-0.0129762	-0.0645261		16686	b2587	0.222838	1.23479		16686	b2587	0.17883	0.89797
16687	b2592	-0.0443488	-0.293954		16687	b2592	0.0441412	0.301584		16687	b2592	-0.014919	-0.095855
16688	b2593	-0.0762346	-0.458104		16688	b2593	-0.0240635	-0.140673		16688	b2593	0.0731041	0.394285
16692	b2597	-0.296299	-0.65939		16692	b2597	-0.597176	-1.30575		16692	b2597	0.0679782	0.150989
16694	b2599	-0.223716	-1.20172		16694	b2599	-0.173842	-0.974186		16694	b2599	-0.132895	-0.722144
16695	b2600	-0.0845238	-0.385482		16695	b2600	0.0613271	0.353825		16695	b2600	-0.114527	-0.622299
16696	b2601	-0.00719838	-0.0411872		16696	b2601	0.0958277	0.475368		16696	b2601	0.115877	0.670885
16697	b2602	-0.191497	-0.997171		16697	b2602	-0.0549266	-0.247461		16697	b2602	0.0528541	0.265273
16698	b2603	0.0376716	0.229652		16698	b2603	0.11654	0.682651		16698	b2603	-0.014582	-0.0842963
16699	b2604	0.0682739	0.332109		16699	b2604	0.178891	0.86225		16699	b2604	0.21092	1.0795
16700	b2605	-0.34735	-1.29322		16700	b2605	-0.0172944	-0.0942897		16700	b2605	-0.0923287	-0.518523
16706	b2611	-0.427631	-2.15068		16706	b2611	-0.351487	-1.82381		16706	b2611	-0.66093	-2.95889
16711	b2617	-0.271171	-0.674214		16711	b2617	-0.36204	-0.95716		16711	b2617	-0.519011	-1.1351
16712	b2618	-0.315643	-0.828431		16712	b2618	-0.174462	-0.387918		16712	b2618	-0.0889413	-0.207199
16715	b2622	0.197915	1.22929		16715	b2622	0.214321	1.19941		16715	b2622	0.183889	0.995371
16716	b2623	-0.0556915	-0.176307		16716	b2623	-0.0644795	-0.199857		16716	b2623	0.0109252	0.0364854
16717	b2624	-0.450385	-2.30485		16717	b2624	-0.519592	-2.61634		16717	b2624	-0.416639	-1.73087
16719	b2626	-0.302516	-1.36256		16719	b2626	-0.133839	-0.608485		16719	b2626	-0.0703236	-0.331799
16720	b2627	-0.0645573	-0.431104		16720	b2627	-0.0620621	-0.41895		16720	b2627	-0.142721	-0.968496
16721	b2628	-0.0842976	-0.44026		16721	b2628	0.0259299	0.144232		16721	b2628	0.00491465	0.0264776
16722	b2629	-0.0548566	-0.233418		16722	b2629	-0.0345505	-0.140353		16722	b2629	-0.0334111	-0.141679
16723	b2630	-0.163294	-0.861612		16723	b2630	-0.0935596	-0.460704		16723	b2630	-0.185909	-0.916953
16726	b2633	0.127517	0.644979		16726	b2633	0.273033	1.48936		16726	b2633	0.239096	1.23131
16727	b2634	0.419633	1.18192		16727	b2634	0.288894	0.605054		16727	b2634	0.357129	0.772974
16728	b2636	0.207991	1.06386		16728	b2636	0.307694	1.64783		16728	b2636	0.335981	1.81034
16729	b2637	-0.0590553	-0.102127		16729	b2637	0.156251	0.249419		16729	b2637	0.0977661	0.140732
16730	b2638	0.220499	1.15183		16730	b2638	0.0785726	0.348295		16730	b2638	0.172162	0.711335
16732	b2641	-0.460491	-3.08536		16732	b2641	-0.260374	-1.76949		16732	b2641	-0.330249	-1.78791
16734	b2643	-0.00823677	-0.0340357		16734	b2643	-0.00279633	-0.011207		16734	b2643	-0.0238681	-0.0863008
16735	b2644	0.155784	0.589488		16735	b2644	0.313599	1.26251		16735	b2644	0.211988	0.818262
16736	b2645	-0.106939	-0.3709		16736	b2645	-0.0449563	-0.172274		16736	b2645	-0.159062	-0.56884
16738	b2647	-0.0273947	-0.238338		16738	b2647	0.0627404	0.557168		16738	b2647	0.00895066	0.0765759
16739	b2648	-0.102693	-0.513444		16739	b2648	-0.150084	-0.692329		16739	b2648	-0.00650285	-0.031274
16750	b2660	-0.238626	-1.21399		16750	b2660	-0.122709	-0.704996		16750	b2660	-0.254734	-1.24773
16751	b2661	0.248174	1.24715		16751	b2661	0.253886	1.18935		16751	b2661	0.333464	1.63882
16752	b2662	0.0471306	0.203924		16752	b2662	0.102769	0.520432		16752	b2662	0.0166159	0.075708
16753	b2663	-0.054893	-0.442608		16753	b2663	-0.0568923	-0.461803		16753	b2663	-0.0690451	-0.557122
16754	b2664	0.278624	1.10395		16754	b2664	0.268269	1.36733		16754	b2664	0.340537	1.61131
16755	b2665	-0.0909841	-0.425251		16755	b2665	0.0453939	0.207469		16755	b2665	-0.0508033	-0.197892
16756	b2666	0.0106053	0.0540612		16756	b2666	0.0553183	0.299003		16756	b2666	0.201241	1.09879
16757	b2667	-0.183047	-1.24847		16757	b2667	0.118648	0.766237		16757	b2667	-0.0308344	-0.189606
16758	b2668	-0.28413	-1.38557		16758	b2668	-0.283839	-1.48509		16758	b2668	-0.315884	-1.4441
16759	b2669	-0.316971	-2.09144		16759	b2669	-0.192283	-1.33861		16759	b2669	-0.183655	-1.23828
16760	b2670	-0.026145	-0.127236		16760	b2670	0.0116346	0.060028		16760	b2670	0.0616713	0.320721
16761	b2671	0.0315811	0.121809		16761	b2671	0.184941	0.766726		16761	b2671	0.178038	0.697859
16762	b2672	0.401535	1.12823		16762	b2672	0.415502	1.12612		16762	b2672	0.49643	1.0699
16763	b2673	-0.430328	-1.30925		16763	b2673	-0.2524	-0.812819		16763	b2673	-0.248596	-0.762488
16764	b2674	-0.399825	-1.86772		16764	b2674	-0.195028	-0.904392		16764	b2674	-0.318866	-1.07382
16765	b2675	-0.154358	-1.02525		16765	b2675	-0.103544	-0.675094		16765	b2675	-0.113768	-0.721044
16766	b2676	0.388111	1.79154		16766	b2676	0.364275	1.95726		16766	b2676	0.518983	2.22742
16767	b2677	-1.06874	-8.57354		16767	b2677	-0.963102	-7.92137		16767	b2677	-0.804991	-6.43999
16768	b2678	-1.01823	-5.1102		16768	b2678	-1.04864	-5.65652		16768	b2678	-0.856278	-3.92044
16769	b2679	-0.622008	-2.07101		16769	b2679	-0.906734	-3.01604		16769	b2679	-0.541343	-1.81622
16771	b2682	0.149593	0.511771		16771	b2682	0.165699	0.61481		16771	b2682	0.229497	1.05851
16772	b2683	0.128304	0.587596		16772	b2683	0.125937	0.540078		16772	b2683	0.261905	1.21421
16773	b2684	-0.808229	-2.07035		16773	b2684	-0.618151	-2.19618		16773	b2684	-0.78693	-2.04133
16774	b2685	0.219537	1.12964		16774	b2685	0.291327	1.4548		16774	b2685	0.269256	1.43081
16775	b2686	-0.0681582	-0.377006		16775	b2686	0.000892028	0.00561443		16775	b2686	-0.0347536	-0.183727
16776	b2687	0.116117	0.539069		16776	b2687	0.148361	0.762389		16776	b2687	0.111627	0.57247
16777	b2688	-0.339221	-1.15491		16777	b2688	-0.307394	-1.00725		16777	b2688	-0.221741	-0.677332
16778	b2689	-0.133767	-0.406674		16778	b2689	-0.0784297	-0.267132		16778	b2689	-0.386554	-1.20297
16779	b2690	-0.434441	-1.99595		16779	b2690	-0.383896	-1.97614		16779	b2690	-0.440956	-2.50449
16784	b2700	0.0657636	0.342425		16784	b2700	-0.0343567	-0.180987		16784	b2700	0.0492542	0.241183
16785	b2701	-0.215508	-1.13154		16785	b2701	-0.0301046	-0.169833		16785	b2701	-0.302923	-1.49386
16788	b2704	-0.0271636	-0.0633962		16788	b2704	-0.0949512	-0.287159		16788	b2704	-0.00851597	-0.0254267
16789	b2705	0.306373	1.49717		16789	b2705	0.291845	1.54802		16789	b2705	0.187779	0.880118
16790	b2706	0.125402	0.518292		16790	b2706	0.315789	0.988296		16790	b2706	0.137268	0.444823
16791	b2707	-0.40335	-1.54137		16791	b2707	-0.211639	-0.879487		16791	b2707	-0.489748	-1.82499
16792	b2708	-0.07742	-0.314448		16792	b2708	-0.136901	-0.550516		16792	b2708	-0.104746	-0.388792
16793	b2709	-0.127785	-0.654246		16793	b2709	-0.127084	-0.641541		16793	b2709	-0.0365269	-0.178943
16794	b2710	0.272041	1.7162		16794	b2710	0.257464	1.75076		16794	b2710	0.243415	1.52747
16795	b2711	-0.285516	-1.29963		16795	b2711	-0.189089	-0.857863		16795	b2711	-0.304532	-1.28792
16796	b2712	0.110487	0.703143		16796	b2712	0.0886553	0.547961		16796	b2712	0.164709	0.996026
16797	b2713	0.0307335	0.19206		16797	b2713	0.0698095	0.465569		16797	b2713	0.22919	1.41228
16798	b2714	-0.142965	-0.769818		16798	b2714	-0.0429885	-0.235745		16798	b2714	-0.0230932	-0.119769
16800	b2716	-0.0185015	-0.10471		16800	b2716	-0.0919979	-0.539012		16800	b2716	-0.0795437	-0.462767
16801	b2717	-0.0249749	-0.117529		16801	b2717	-0.0548235	-0.301519		16801	b2717	0.005686	0.0254319
16802	b2718	0.369605	2.10774		16802	b2718	0.286017	1.55534		16802	b2718	0.247132	1.28097
16803	b2719	0.183015	0.745886		16803	b2719	0.0507442	0.245779		16803	b2719	-0.00292684	-0.0121521
16804	b2720	-0.0229832	-0.117153		16804	b2720	-0.0305802	-0.143346		16804	b2720	-0.077951	-0.409195
16805	b2721	-0.160216	-1.06076		16805	b2721	0.00131926	0.00912074		16805	b2721	-0.0476419	-0.294104
16806	b2722	0.0686677	0.28408		16806	b2722	0.00895011	0.0452044		16806	b2722	0.0409461	0.158266
16807	b2723	0.0857548	0.512886		16807	b2723	0.0179854	0.117215		16807	b2723	-0.0287316	-0.154037
16808	b2724	0.361957	1.1897		16808	b2724	0.23718	0.795056		16808	b2724	0.348739	1.17297
16809	b2725	-0.151783	-0.446692		16809	b2725	-0.132604	-0.523335		16809	b2725	-0.0469196	-0.144593
16810	b2726	-0.371734	-1.0356		16810	b2726	-0.349239	-1.30303		16810	b2726	-0.406073	-1.30075
16811	b2727	0.128812	0.671791		16811	b2727	0.117361	0.525098		16811	b2727	0.24634	1.16491
16812	b2728	-0.108649	-0.323366		16812	b2728	-0.143675	-0.488734		16812	b2728	-0.180104	-0.495745
16813	b2729	0.0846912	0.435328		16813	b2729	0.0675562	0.323264		16813	b2729	0.134266	0.594649
16814	b2730	-0.0652665	-0.312188		16814	b2730	-0.105417	-0.507309		16814	b2730	-0.0720339	-0.392955
16815	b2731	0.0484126	0.286846		16815	b2731	0.113658	0.737199		16815	b2731	0.0921066	0.557109
16816	b2732	-0.0589116	-0.229921		16816	b2732	-0.106778	-0.403131		16816	b2732	-0.0966466	-0.307648
16817	b2733	-0.0861594	-0.664326		16817	b2733	-0.00675513	-0.0523325		16817	b2733	-0.12939	-0.977834
16818	b2734	-0.710869	-1.5524		16818	b2734	-0.563918	-1.24631		16818	b2734	-0.637903	-1.18763
16819	b2735	-0.30283	-1.24809		16819	b2735	-0.269353	-1.01018		16819	b2735	-0.4005	-1.40326
16820	b2736	0.0941893	0.457048		16820	b2736	0.0495429	0.232322		16820	b2736	0.0388771	0.169344
16821	b2737	-0.205807	-1.01147		16821	b2737	-0.247005	-1.39317		16821	b2737	-0.201166	-1.02549
16822	b2738	-0.132886	-0.455652		16822	b2738	-0.0706445	-0.302444		16822	b2738	-0.221521	-0.716797
16823	b2739	0.138024	0.911242		16823	b2739	0.119273	0.727032		16823	b2739	0.11471	0.660981
16824	b2740	0.0375848	0.207567		16824	b2740	0.0754326	0.443296		16824	b2740	0.105939	0.570174
16825	b2741	0.361254	2.39827		16825	b2741	0.719101	4.7311		16825	b2741	0.16565	1.05312
16826	b2742	0.0251104	0.172469		16826	b2742	0.175185	1.04727		16826	b2742	0.165298	0.998239
16827	b2743	0.0918738	0.272613		16827	b2743	-0.232361	-0.776909		16827	b2743	-0.20363	-0.460239
16828	b2744	-0.0197663	-0.109631		16828	b2744	-0.058982	-0.301666		16828	b2744	0.0265337	0.126179
16829	b2745	0.0936147	0.625265		16829	b2745	0.071975	0.479617		16829	b2745	-0.0228271	-0.135518
16833	b2749	0.0919235	0.464745		16833	b2749	0.0752861	0.384831		16833	b2749	0.0439402	0.244253
16834	b2750	-0.186107	-0.844484		16834	b2750	-0.132406	-0.682623		16834	b2750	0.166471	0.67601
16835	b2751	0.186645	0.805434		16835	b2751	0.153104	0.751362		16835	b2751	0.32896	1.33998
16836	b2752	0.167849	0.912174		16836	b2752	-0.031556	-0.138046		16836	b2752	0.0346154	0.144778
16837	b2753	-0.00544425	-0.0381857		16837	b2753	0.0433665	0.308969		16837	b2753	0.0416058	0.29188
16838	b2754	-0.5652	-1.25121		16838	b2754	-0.402745	-0.997959		16838	b2754	-0.487755	-1.11182
16839	b2755	-0.00970446	-0.0517185		16839	b2755	0.037838	0.233704		16839	b2755	-0.0669928	-0.322469
16840	b2756	0.219913	1.22308		16840	b2756	0.375251	2.61308		16840	b2756	0.229883	1.29926
16841	b2757	-0.0602659	-0.408757		16841	b2757	-0.118936	-0.848364		16841	b2757	-0.0672679	-0.437159
16842	b2758	0.121747	0.577392		16842	b2758	0.0853177	0.412662		16842	b2758	-0.00292684	-0.0150847
16843	b2759	-0.209014	-1.12733		16843	b2759	-0.0780682	-0.410177		16843	b2759	-0.224584	-1.14052
16844	b2760	-0.137886	-1.04374		16844	b2760	-0.138855	-1.01278		16844	b2760	-0.170831	-1.23243
16845	b2761	-0.0296703	-0.238376		16845	b2761	-0.0290752	-0.239927		16845	b2761	-0.0413966	-0.328688
16846	b2762	-1.55534	-8.53054		16846	b2762	-1.36945	-8.4876		16846	b2762	-0.721489	-4.11538
16847	b2763	-0.527045	-3.00665		16847	b2763	-0.611509	-4.16769		16847	b2763	-0.281983	-1.86048
16848	b2764	-0.336166	-2.27929		16848	b2764	-0.335313	-2.09227		16848	b2764	-0.0774729	-0.531272
16849	b2765	-0.0720239	-0.330995		16849	b2765	0.030124	0.130814		16849	b2765	-0.0149285	-0.0705556
16850	b2766	0.143477	0.892454		16850	b2766	0.0826135	0.496522		16850	b2766	0.195272	1.30478
16851	b2767	-0.289434	-1.04795		16851	b2767	-0.211399	-0.853237		16851	b2767	-0.308984	-1.07733
16852	b2768	-0.603088	-2.15417		16852	b2768	-0.52577	-1.52629		16852	b2768	-0.268852	-0.823724
16853	b2769	-0.198804	-1.04897		16853	b2769	-0.141112	-0.738564		16853	b2769	-0.124946	-0.599924
16854	b2770	0.0972045	0.526102		16854	b2770	0.252549	1.45988		16854	b2770	0.183723	0.989182
16855	b2771	0.0983323	0.567293		16855	b2771	0.19433	0.96812		16855	b2771	0.0872119	0.447991
16858	b2774	-0.0831462	-0.191664		16858	b2774	0.00858219	0.0198892		16858	b2774	0.167424	0.409979
16859	b2775	-0.00756457	-0.0496059		16859	b2775	-0.00892669	-0.066483		16859	b2775	0.012528	0.0834884
16860	b2776	0.067673	0.453938		16860	b2776	-0.0388831	-0.225637		16860	b2776	-0.0106648	-0.0683383
16861	b2777	0.177077	1.14225		16861	b2777	0.167608	1.1138		16861	b2777	0.208672	1.27808
16862	b2778	-0.217068	-0.882848		16862	b2778	-0.39111	-1.64733		16862	b2778	-0.313865	-1.06477
16865	b2781	-0.0858926	-0.410165		16865	b2781	-0.0422194	-0.227308		16865	b2781	-0.0868448	-0.426944
16866	b2782	0.201114	0.678889		16866	b2782	-0.0401389	-0.113402		16866	b2782	-0.00829803	-0.02929
16867	b2783	-0.61327	-1.68699		16867	b2783	-0.290998	-0.769281		16867	b2783	-0.518231	-1.30522
16868	b2784	-1.59114	-8.63606		16868	b2784	-1.85788	-9.50314		16868	b2784	-1.40352	-7.58277
16869	b2785	-0.432404	-2.18223		16869	b2785	-0.193854	-0.988724		16869	b2785	-0.342535	-1.7063
16870	b2786	-0.114025	-1.00905		16870	b2786	-0.117692	-1.03859		16870	b2786	-0.115698	-1.01385
16871	b2787	0.177956	1.08235		16871	b2787	0.270825	1.59748		16871	b2787	0.134967	0.742247
16872	b2788	0.0815134	0.483524		16872	b2788	0.114104	0.729224		16872	b2788	0.0569296	0.320148
16873	b2789	0.183902	1.21031		16873	b2789	0.218866	1.46029		16873	b2789	0.211621	1.35401
16874	b2790	0.200355	0.592347		16874	b2790	0.270938	0.69744		16874	b2790	0.197311	0.533277
16875	b2791	0.22212	1.51461		16875	b2791	0.168642	1.15418		16875	b2791	0.151889	0.900868
16876	b2792	0.0795999	0.203004		16876	b2792	0.217177	0.620772		16876	b2792	0.0126494	0.0272517
16877	b2793	0.0340845	0.208507		16877	b2793	0.0431007	0.268845		16877	b2793	-0.0270782	-0.167379
16878	b2794	0.0992594	0.559521		16878	b2794	0.115436	0.73148		16878	b2794	0.0903554	0.441616
16879	b2795	0.0387153	0.265344		16879	b2795	0.0439292	0.318638		16879	b2795	0.0592669	0.421382
16880	b2796	0.159787	1.13152		16880	b2796	0.188964	1.38452		16880	b2796	0.127423	0.898301
16881	b2797	0.144119	1.01008		16881	b2797	0.17339	1.28562		16881	b2797	0.257992	1.84455
16882	b2798	0.143577	0.469928		16882	b2798	0.381079	1.28632		16882	b2798	0.186346	0.579394
16883	b2799	0.0741359	0.416586		16883	b2799	0.0775945	0.443543		16883	b2799	-0.00861272	-0.0491838
16884	b2800	-0.0809784	-0.433522		16884	b2800	-0.144203	-0.712782		16884	b2800	-0.195517	-0.979285
16885	b2801	-0.0226607	-0.138279		16885	b2801	0.0185941	0.12494		16885	b2801	-0.0686992	-0.417815
16886	b2802	0.147629	1.00649		16886	b2802	0.193458	1.32979		16886	b2802	0.135797	0.870071
16887	b2803	0.194047	1.13293		16887	b2803	0.311887	1.89857		16887	b2803	0.202031	1.08448
16889	b2805	-0.05806	-0.292514		16889	b2805	-0.0464196	-0.283		16889	b2805	0.00610915	0.0318352
16890	b2806	0.132496	0.703705		16890	b2806	0.0898637	0.518901		16890	b2806	0.00388102	0.0212608
16891	b2807	0.210073	0.935807		16891	b2807	0.0948679	0.42413		16891	b2807	0.150388	0.595503
16893	b2809	0.447678	1.60176		16893	b2809	0.239601	0.854365		16893	b2809	0.0558992	0.180012
16894	b2810	-0.137273	-0.627346		16894	b2810	-0.109196	-0.515881		16894	b2810	-0.18649	-0.814288
16895	b2811	-0.622125	-2.15431		16895	b2811	-0.530785	-1.5945		16895	b2811	-0.741538	-1.88716
16896	b2812	-0.0972837	-0.665216		16896	b2812	-0.0783587	-0.464308		16896	b2812	-0.0977911	-0.596454
16897	b2813	0.0165524	0.093719		16897	b2813	0.0114079	0.0727244		16897	b2813	-0.140849	-0.886818
16898	b2817	-0.0896184	-0.599542		16898	b2817	-0.21628	-1.45254		16898	b2817	-0.247893	-1.33166
16899	b2818	0.0608306	0.342254		16899	b2818	0.195704	1.22372		16899	b2818	0.228564	1.25019
16900	b2819	0.164987	0.912741		16900	b2819	0.247732	1.37286		16900	b2819	0.136012	0.702343
16902	b2821	0.0179926	0.130527		16902	b2821	0.0503897	0.368323		16902	b2821	0.0577478	0.431294
16904	b2823	0.44516	1.43066		16904	b2823	0.774972	3.50584		16904	b2823	0.711096	2.56941
16905	b2824	0.307042	1.2991		16905	b2824	0.0547882	0.174579		16905	b2824	0.231086	0.861787
16906	b2825	0.0705382	0.316856		16906	b2825	0.121113	0.637035		16906	b2825	0.0186004	0.0708439
16907	b2826	0.0799076	0.53874		16907	b2826	0.0102835	0.0691989		16907	b2826	0.087518	0.552456
16910	b2829	0.398418	3.20619		16910	b2829	0.51069	4.14462		16910	b2829	0.337286	2.67162
16912	b2831	-0.228799	-0.982467		16912	b2831	-0.360992	-1.28656		16912	b2831	-0.383872	-1.49984
16913	b2832	0.165517	0.838785		16913	b2832	0.390699	2.04352		16913	b2832	0.245096	1.29554
16914	b2833	0.119469	0.738004		16914	b2833	0.180787	1.11292		16914	b2833	0.19253	1.23548
16915	b2834	-0.10162	-0.620812		16915	b2834	-0.155352	-0.896213		16915	b2834	-0.0318172	-0.174364
16916	b2835	0.172341	1.06354		16916	b2835	0.203308	1.37611		16916	b2835	0.179387	1.15768
16917	b2836	-0.0242194	-0.16512		16917	b2836	-0.0180978	-0.136575		16917	b2836	-0.0696608	-0.491479
16918	b2837	0.140576	0.830655		16918	b2837	0.0274845	0.173984		16918	b2837	-0.131544	-0.774404
16919	b2838	-0.196309	-1.34236		16919	b2838	-0.151809	-1.02638		16919	b2838	-0.196626	-1.34961
16920	b2839	0.171489	0.748521		16920	b2839	0.131174	0.591921		16920	b2839	0.239956	1.13453
16921	b2840	0.148294	0.597525		16921	b2840	0.201254	0.786182		16921	b2840	0.125502	0.4927
16922	b2841	0.0267	0.158632		16922	b2841	0.091318	0.581648		16922	b2841	0.130797	0.813986
16923	b2842	-0.0261376	-0.192299		16923	b2842	-0.0185789	-0.14397		16923	b2842	-0.0169129	-0.121753
16924	b2843	0.0622215	0.390194		16924	b2843	0.0439793	0.282911		16924	b2843	-0.101436	-0.573895
16925	b2844	0.163024	1.1634		16925	b2844	0.201336	1.36578		16925	b2844	0.0352	0.23066
16926	b2845	-0.0338346	-0.275423		16926	b2845	-0.0682179	-0.568127		16926	b2845	-0.0202454	-0.160291
16944	b2863	-0.0189453	-0.140391		16944	b2863	-0.0803786	-0.594173		16944	b2863	-0.0955417	-0.68231
16945	b2865	-0.147055	-0.88938		16945	b2865	-0.173686	-1.02895		16945	b2865	-0.12624	-0.73402
16946	b2866	0.154212	1.10089		16946	b2866	0.275324	1.96382		16946	b2866	0.197883	1.29027
16947	b2867	0.109587	0.467811		16947	b2867	-0.0581972	-0.235688		16947	b2867	-0.0713572	-0.301688
16948	b2868	0.359605	1.88603		16948	b2868	0.202774	0.960758		16948	b2868	0.158292	0.730473
16949	b2869	0.118398	0.923687		16949	b2869	0.116189	0.903358		16949	b2869	0.0212182	0.16038
16951	b2871	-0.0785341	-0.453088		16951	b2871	-0.225639	-1.31554		16951	b2871	-0.156277	-0.949412
[truncated: 1,301 more rows]

## Sheet: Filtered fitness - with Communi
Genes with negative fitness during E. coli growth with the community on CCA
with Community
bnumber	gene_name	gene product	Kegg module	Days
b0046	kefF	regulator of KefC-mediated potassium transport and quinone oxidoreductase		1
b0592	fepB	ferric enterobactin ABC transporter periplasmic binding protein	Membrane transport	1,2,3
b2312	purF	amidophosphoribosyltransferase	Nucleotides metabolism / Amino acids metabolism	1,2,3
b3006	exbB	Ton complex subunit ExbB		1,2,3
b3803	hemX	conserved protein HemX	Metabolism of cofactors and vitamins	1,2,3
b0113	pdhR	DNA-binding transcriptional dual regulator PdhR		2
b3794	rffM	UDP-N-acetyl-D-mannosaminuronic acid transferase		2
b3292	zntR	DNA-binding transcriptional activator ZntR		3
b3649	rpoZ	RNA polymerase subunit omega	Transcription / Nucleotides metabolism	2,3
b3281	aroE	shikimate dehydrogenase	Amino acid metabolism	3
b0138	yadM	putative fimbrial protein YadM		1
b0619	dpiB	sensory histidine kinase DpiB		1,2,3
b2340	sixA	phosphohistidine phosphatase		1,2,3
b3029	ygiN	putative quinol monooxygenase YgiN		1
b3816	corA	Ni2+/Co2+/Mg2+ transporter		1,2,3
b0522	purK	5-(carboxyamino)imidazole ribonucleotide synthase	Nucleotides metabolism	2,3
b3960	argH	argininosuccinate lyase	Amino acid metabolism	2
b3609	secB	SecB chaperone	Folding, sorting and degradation / Membrane transport / Quorum sensing	3
b0141	yadN	putative fimbrial protein YadN		1
b0723	sdhA	succinate:quinone oxidoreductase, FAD binding protein	Carbohydrate metabolism / Energy metabolism	1,2,3
b2414	cysK	O-acetylserine sulfhydrylase A	Energy metabolism	1,2,3
b3138	agaB	galactosamine-specific PTS enzyme IIB component	Carbohydrate metabolism / Membrane transport	1
b3842	rfaH	transcription antiterminator RfaH		1,3
b0523	purE	N5-carboxyaminoimidazole ribonucleotide mutase	Nucleotides metabolism	2
b3965	trmA	tRNA m5U54 methyltransferase		2
b3616	tdh	threonine dehydrogenase	Amino acid metabolism	3
b0149	mrcB	peptidoglycan glycosyltransferase / peptidoglycan DD-transpeptidase MrcB	Glycan biosynthesis and metabolism	1,2,3
b0758	galT	galactose-1-phosphate uridylyltransferase	Carbohydrate metabolism	1
b2435	amiA	N-acetylmuramoyl-L-alanine amidase A	Drug resistance	1,2
b3162	deaD	DEAD-box RNA helicase	Folding, sorting and degradation	1,2,3
b3961	oxyR	DNA-binding transcriptional dual regulator OxyR	Biofilm formation	1,2,3
b0588	fepC	ferric enterobactin ABC transporter ATP binding subunit	Membrane transport	2,3
b4018	iclR	DNA-binding transcriptional repressor IclR		2
b3626	waaJ	UDP-glucose:(glucosyl)LPS alpha;-1,2-glucosyltransferase		3
b0225	yafQ	ribosome-dependent mRNA interferase toxin YafQ		1
b0759	galE	UDP-glucose 4-epimerase	Carbohydrate metabolism	1,2,3
b2479	gcvR	putative transcriptional regulator GcvR	Biofilm formation	1,2,3
b3289	rsmB	16S rRNA m5C967 methyltransferase		1,2,3
b4005	purD	phosphoribosylamine-glycine ligase	Nucleotides metabolism	1,2,3
b0589	fepG	ferric enterobactin ABC transporter membrane subunit FepG	Membrane transport	2,3
b4046	zur	DNA-binding transcriptional repressor Zur	Quorum sensing	2,3
b4006	purH	bifunctional AICAR transformylase/IMP cyclohydrolase	Nucleotides metabolism / Metabolism of cofactors and vitamins	3
b0314	betT	betaine aldehyde dehydrogenase		1,3
b0908	aroA	3-phosphoshikimate 1-carboxyvinyltransferase	Amino acid metabolism	1,3
b2502	ppx	exopolyphosphatase	Nucleotides metabolism	1,2,3
b3387	dam	DNA adenine methyltransferase	Replication and repair	1
b4191	ulaR	DNA-binding transcriptional repressor UlaR		1,2,3
b1760	ynjH	DUF1496 domain-containing protein YnjH		2
b4222	ytfP	gamma-glutamylamine cyclotransferase family protein YtfP		2
b0311	betA	choline dehydrogenase		1,2,3
b0882	clpA	ATP-dependent Clp protease ATP-binding subunit ClpA		1
b2501	ppk	polyphosphate kinase	Energy metabolism / Folding sorting and degradation	1,2,3
b3349	slyD	FKBP-type peptidyl-prolyl cis-trans isomerase SlyD		1,2,3
b4011	yjaA	stress response protein		1,3
b0907	serC	phosphoserine/phosphohydroxythreonine aminotransferase	Energy metabolism / Amino acid metabolism/ Metabolism of cofactors and vitamins	2,3
b4089	alsR	DNA-binding transcriptional repressor AlsR		2
b4174	hflK	regulator of FtsH protease		3
b0364	yaiS	conserved protein YaiS		1,2,3
b1163	bluF	blue light-responsive regulator of BluR		1
b2641	ypjM_1	CP4-57 prophage; putative arsenite transporter, N-terminal fragment		1
b3398	yrfF	inner membrane protein - inhibits the Rcs signaling pathway		1,2,3
b4208	cycA	serine/alanine/glycine/cycloserine:H<sup>+</sup>symporter		1,2,3
b1830	prc	tail-specific protease		2,3
b2557	purL	phosphoribosylformylglycinamide synthetase	Nucleotides metabolism	2,3
b0400	phoR	sensory histidine kinase PhoR		1,2,3
b1192	ldcA	murein L,D-carboxypeptidase		1,2,3
b2677	proV	glycine betaine ABC transporter ATP binding subunit ProV	Membrane transport	1,2,3
b3414	nfuA	iron-sulfur cluster insertion protein NfuA		1,2,3
b4214	cysQ	3'(2'),5'-biphosphate nucleotidase	Energy metabolism	1,2,3
b2372	yfdV	putative transport protein YfdV		2
b0019	nhaA	Na+:H+ antiporter NhaA		3
b0401	brnQ	branched chain amino acid transporter BrnQ		1,2,3
b1676	pykF	pyruvate kinase I	Carbohydraye metabolism / Nucleotides metabolism	1
b2678	proW	glycine betaine ABC transporter membrane subunit ProW	Membrane transport	1,2,3
b3469	zntA	Zn2+/Cd2+>/Pb2+ exporting P-type ATPase		1,2,3
b4313	fimE	regulator for fimA		1,2,3
b2466	ypfG	DUF1176 domain-containing protein YpfG		2,3
b0033	carB	carbamoyl phosphate synthetase subunit beta	Nucleotides metabolism / Amino acids metabolism	3
b0431	cyoB	cytochrome bo3 ubiquinol oxidase subunit I	Energy metabolism	1,2,3
b1855	lpxM	myristoyl-acyl carrier protein-dependent acyltransferase	Glycan biosynthesis and metabolism	1
b2763	cysI	sulfite reductase, hemoprotein subunit	Energy metabolism	1,2
b3630	waaP	lipopolysaccharide core heptose (I) kinase	Glycan biosynthesis and metabolism	1,3
b4388	serB	phosphoserine phosphatase	Energy metabolism / Amino acid metabolism	1,2,3
b3205	rapZ	RNase adaptor protein		2,3
b1232	purU	formyltetrahydrofolate deformylase	Carbohydrate metabolism / Metabolism of cofactors and vitamins	3
b0430	cyoC	cytochrome bo3 ubiquinol oxidase subunit III	Energy metabolism	1,2,3
b1799	dmlR	DNA-binding transcriptional regulator DmlR		1,2
b2762	cysH	phosphoadenosine phosphosulfate reductase	Energy metabolism	1,2,3
b3516	gadX	DNA-binding transcriptional dual regulator GadX		1,2,3
b4383	deoB	phosphopentomutase	Carbohydrate metabolism / Nucleotides metabolism	1
b2679	proX	glycine betaine ABC transporter periplasmic binding protein ProX	Membrane transport	2
b0676	nagC	DNA-binding transcriptional dual regulator NagC		3
b0432	cyoA	cytochrome bo3 ubiquinol oxidase subunit II	Energy metabolism	1
b1856	mepM	peptidoglycan DD-endopeptidase		1,2,3
b2784	relA	GDP/GTP pyrophosphokinase	Nucleotides metabolism	1,2,3
b3631	waaG	lipopolysaccharide glucosyltransferase I	Glycan biosynthesis and metabolism	1,3
b4454	rdlD	antisense regulatory RNA RdlD		1
b3247	rng	RNase G		2
b1693	aroD	3-dehydroquinate dehydratase	Amino acid metabolism	3
b0460	hha	haemolysin expression modulating protein		1
b2085	yegR	uncharacterized protein YegR		1,3
b2906	ubiI	2-octaprenylphenol hydroxylase	Metabolism of cofactors and vitamins	1,3
b3652	recG	RecG DNA helicase	Replication and repair	1,2,3
b3779	gpp	guanosine-5'-triphosphate,3'-diphosphate phosphatase	Nucleotides metabolism	1,2,3
b3388	damX	cell division protein DamX		2
b1727	hxpB	hexitol phosphatase B		3
b0584	fepA	ferric enterobactin outer membrane transporter	Signal transduction	1,2,3
b2216	rcsD	RcsD phosphotransferase	Signal transduction / Biofilm formation	1
b2913	serA	phosphoglycerate dehydrogenase	Energy metabolism / Amino acid metabolism	1,2,3
b3766	ilvL	ilvXGMEDA operon leader peptide		1,2,3
b3849	trkH	K+ transporter		1,2,3
b3389	aroB	3-dehydroquinate synthase	Amino acid metabolism	2,3
b2499	purM	phosphoribosylformylglycinamide cyclo-ligase	Nucleotides metabolism	3
b0585	fes	enterochelin esterase		1,2,3
b2278	nuoL	NADH:quinone oxidoreductase subunit L	Energy metabolism	1,2,3
b2924	mscS	small conductance mechanosensitive channel MscS		1
b3781	trxA	thioredoxin 1		1,2,3
b3871	bipA	ribosome-dependent GTPase, ribosome assembly factor		1,2,3
b3462	ftsX	cell division protein FtsX	Membrane transport	2
b3260	dusB	tRNA-dihydrouridine synthase B		3
b0590	fepD	ferric enterobactin ABC transporter membrane subunit FebD	Membrane transport	1,2,3
b2289	lrhA	DNA-binding transcriptional dual regulator LrhA		1,2,3
b3005	exbD	Ton complex subunit ExbD		1,2,3
b3802	hemY	putative protoheme IX synthesis protein		1,2
b4646	yrdE			1
b3617	kbl	2-amino-3-ketobutyrate CoA ligase	Amino acid metabolism	2,3

## Sheet: Core negative fitness
Genes with negative fitness in all E. coli growths (alone, in pairwise conditions and with the community) ==> Core negative fitness
bnumber	gene_name	gene product	Kegg module
b0019	nhaA	Na+:H+ antiporter NhaA
b0046	kefF	regulator of KefC-mediated potassium transport and quinone oxidoreductase
b0149	mrcB	peptidoglycan glycosyltransferase / peptidoglycan DD-transpeptidase MrcB	Glycan biosynthesis and metabolism
b0311	betA	choline dehydrogenase
b0314	betT	betaine aldehyde dehydrogenase
b0364	yaiS	conserved protein YaiS
b0400	phoR	sensory histidine kinase PhoR
b0401	brnQ	branched chain amino acid transporter BrnQ
b0430	cyoC	cytochrome bo3 ubiquinol oxidase subunit III	Energy metabolism
b0431	cyoB	cytochrome bo3 ubiquinol oxidase subunit I	Energy metabolism
b0460	hha	haemolysin expression modulating protein
b0584	fepA	ferric enterobactin outer membrane transporter	Signal transduction
b0585	fes	enterochelin esterase
b0588	fepC	ferric enterobactin ABC transporter ATP binding subunit	Membrane transport
b0589	fepG	ferric enterobactin ABC transporter membrane subunit FepG	Membrane transport
b0590	fepD	ferric enterobactin ABC transporter membrane subunit FebD	Membrane transport
b0592	fepB	ferric enterobactin ABC transporter periplasmic binding protein	Membrane transport
b0619	dpiB	sensory histidine kinase DpiB
b0676	nagC	DNA-binding transcriptional dual regulator NagC
b0723	sdhA	succinate:quinone oxidoreductase, FAD binding protein	Carbohydrate metabolism / Energy metabolism
b0759	galE	UDP-glucose 4-epimerase	Carbohydrate metabolism
b0907	serC	phosphoserine/phosphohydroxythreonine aminotransferase	Energy metabolism / Amino acid metabolism/ Metabolism of cofactors and vitamins
b1192	ldcA	murein L,D-carboxypeptidase
b1799	dmlR	DNA-binding transcriptional regulator DmlR
b1856	mepM	peptidoglycan DD-endopeptidase
b2085	yegR	uncharacterized protein YegR
b2278	nuoL	NADH:quinone oxidoreductase subunit L	Energy metabolism
b2289	lrhA	DNA-binding transcriptional dual regulator LrhA
b2340	sixA	phosphohistidine phosphatase
b2414	cysK	O-acetylserine sulfhydrylase A	Energy metabolism
b2466	ypfG	DUF1176 domain-containing protein YpfG
b2479	gcvR	putative transcriptional regulator GcvR	Biofilm formation
b2501	ppk	polyphosphate kinase	Energy metabolism / Folding sorting and degradation
b2502	ppx	exopolyphosphatase	Nucleotides metabolism
b2677	proV	glycine betaine ABC transporter ATP binding subunit ProV	Membrane transport
b2678	proW	glycine betaine ABC transporter membrane subunit ProW	Membrane transport
b2762	cysH	phosphoadenosine phosphosulfate reductase	Energy metabolism
b2763	cysI	sulfite reductase, hemoprotein subunit	Energy metabolism
b2784	relA	GDP/GTP pyrophosphokinase	Nucleotides metabolism
b2906	ubiI	2-octaprenylphenol hydroxylase	Metabolism of cofactors and vitamins
b2913	serA	phosphoglycerate dehydrogenase	Energy metabolism / Amino acid metabolism
b2924	mscS	small conductance mechanosensitive channel MscS
b3005	exbD	Ton complex subunit ExbD
b3006	exbB	Ton complex subunit ExbB
b3162	deaD	DEAD-box RNA helicase	Folding, sorting and degradation
b3205	rapZ	RNase adaptor protein
b3289	rsmB	16S rRNA m5C967 methyltransferase
b3349	slyD	FKBP-type peptidyl-prolyl cis-trans isomerase SlyD
b3389	aroB	3-dehydroquinate synthase	Amino acid metabolism
b3398	yrfF	inner membrane protein - inhibits the Rcs signaling pathway
b3414	nfuA	iron-sulfur cluster insertion protein NfuA
b3469	zntA	Zn2+/Cd2+>/Pb2+ exporting P-type ATPase
b3516	gadX	DNA-binding transcriptional dual regulator GadX
b3617	kbl	2-amino-3-ketobutyrate CoA ligase	Amino acid metabolism
b3626	waaJ	UDP-glucose:(glucosyl)LPS alpha;-1,2-glucosyltransferase
b3630	waaP	lipopolysaccharide core heptose (I) kinase	Glycan biosynthesis and metabolism
b3631	waaG	lipopolysaccharide glucosyltransferase I	Glycan biosynthesis and metabolism
b3649	rpoZ	RNA polymerase subunit omega	Transcription / Nucleotides metabolism
b3652	recG	RecG DNA helicase	Replication and repair
b3766	ilvL	ilvXGMEDA operon leader peptide
b3779	gpp	guanosine-5'-triphosphate,3'-diphosphate phosphatase	Nucleotides metabolism
b3781	trxA	thioredoxin 1
b3794	rffM	UDP-N-acetyl-D-mannosaminuronic acid transferase
b3802	hemY	putative protoheme IX synthesis protein
b3803	hemX	conserved protein HemX	Metabolism of cofactors and vitamins
b3816	corA	Ni2+/Co2+/Mg2+ transporter
b3849	trkH	K+ transporter
b3871	bipA	ribosome-dependent GTPase, ribosome assembly factor
b3965	trmA	tRNA m5U54 methyltransferase
b4005	purD	phosphoribosylamine-glycine ligase	Nucleotides metabolism
b4174	hflK	regulator of FtsH protease
b4208	cycA	serine/alanine/glycine/cycloserine:H<sup>+</sup>symporter
b4214	cysQ	3'(2'),5'-biphosphate nucleotidase	Energy metabolism
b4313	fimE	regulator for fimA
b4388	serB	phosphoserine phosphatase	Energy metabolism / Amino acid metabolism

## Sheet: Interaction-induced fitness
Comparison of the E. coli pairwise-induced negative fitness with the community-induced negative fitness
bnumber	gene_name	gene product	Kegg module	Alone	Pairwise	Community
b3616	tdh	threonine dehydrogenase	Amino acid metabolism				Conserved interaction-induced fitness			Negative fitness
b0908	aroA	3-phosphoshikimate 1-carboxyvinyltransferase	Amino acid metabolism							No negative fitness
b3281	aroE	Shikimate dehydrogenase	Amino acid metabolism
b3961	oxyR	DNA-binding transcriptional dual regulator OxyR	Biofilm formation
b3138	agaB	galactosamine-specific PTS enzyme IIB component	Carbohydrate metabolism / Membrane transport
b4383	deoB	phosphopentomutase	Carbohydrate metabolism / Nucleotides metabolism
b1676	pykF	pyruvate kinase I	Carbohydraye metabolism / Nucleotides metabolism
b2435	amiA	N-acetylmuramoyl-L-alanine amidase A	Drug resistance
b1855	lpxM	myristoyl-acyl carrier protein-dependent acyltransferase	Glycan biosynthesis and metabolism
b2679	proX	glycine betaine ABC transporter periplasmic binding protein ProX	Membrane transport
b2499	purM	phosphoribosylformylglycinamide cyclo-ligase	Nucleotides metabolism
b4046	zur	DNA-binding transcriptional repressor Zur	Quorum sensing
b2216	rcsD	RcsD phosphotransferase	Signal transduction / Biofilm formation
b4006	purH	bifunctional AICAR transformylase/IMP cyclohydrolase	Nucleotides metabolism / Metabolism of cofactors and vitamins
b4191	ulaR	DNA-binding transcriptional repressor UlaR
b0113	pdhR	DNA-binding transcriptional dual regulator PdhR
b3292	zntR	DNA-binding transcriptional activator ZntR
b4018	iclR	DNA-binding transcriptional repressor IclR
b3842	rfaH	transcription antiterminator RfaH
b4089	alsR	DNA-binding transcriptional repressor AlsR
b1163	bluF	blue light-responsive regulator of BluR
b4011	yjaA	stress response protein
b3029	ygiN	putative quinol monooxygenase YgiN
b0138	yadM	putative fimbrial protein YadM
b0882	clpA	ATP-dependent Clp protease ATP-binding subunit ClpA
b4222	ytfP	gamma-glutamylamine cyclotransferase family protein YtfP
b0225	yafQ	ribosome-dependent mRNA interferase toxin YafQ
b1727	hxpB	hexitol phosphatase B
b2372	yfdV	putative transport protein YfdV
b0003	thrB	homoserine kinase	Amino acid metabolism				Pairwise-specific interaction-induced fitness
b1832	msrC	free methionine-(R)-sulfoxide reductase	Amino acid metabolism
b1022	pgaC	poly-N-acetyl-D-glucosamine synthase subunit PgaC	Biofilm formation
b3786	wecB	UDP-N-acetylglucosamine 2-epimerase	Carbohydrate metabolism
b0720	gltA	citrate synthase	Carbohydrate metabolism
b3225	nanA	N-acetylneuraminate lyase	Carbohydrate metabolism
b1896	otsA	trehalose-6-phosphate synthase	Carbohydrate metabolism
b1732	katE	catalase II	Carbohydrate metabolism / Amino acid metabolism
b3236	mdh	malate dehydrogenase	Carbohydrate metabolism / Energy metabolism / Amino acid metabolism
b0462	acrB	multidrug efflux pump RND permease AcrB	Drug resistance
b0463	acrA	multidrug efflux pump membrane fusion protein AcrA	Drug resistance
b2286	nuoC	NADH:quinone oxidoreductase subunit CD	Energy metabolism
b3627	waaO	UDP-D-glucose:(glucosyl)LPS alpha-1,3-glucosyltransferase	Glycan biosynthesis and metabolism
b1106	thiK	thiamine kinase	Metabolism of cofactors and vitamins
b0469	purG	adenine phosphoribosyltransferase	Nucleotides metabolism
b4398	creB	DNA-binding transcriptional regulator CreB	Signal transduction
b0696	kdpC	K+ transporting P-type ATPase subunit KdpC	Signal transduction
b2218	rcsC	sensory histidine kinase RcsC	Signal transduction / Biofilm formation
b3911	cpxA	sensory histidine kinase CpxA	Signal transduction / Drug resistance
b3792	wzxE	lipid III flippase
b1105	lpoB	outer membrane lipoprotein - activator of MrcB activity
b3264	envR	DNA-binding transcriptional repressor EnvR
b2837	galR	DNA-binding transcriptional dual regulator GalR
b0846	rcdA	DNA-binding transcriptional regulator RcdA
b1658	purR	DNA-binding transcriptional repressor PurR
b2684	mprA	DNA-binding transcriptional repressor MprA
b1132	hflD	lysogenization regulator
b2674	nrdI	dimanganese-tyrosyl radical cofactor maintenance flavodoxin NrdI
b3348	slyX	protein SlyX
b4184	yjfL	conserved inner membrane protein YjfL
b0991	ymcE	protein YmcE
b3146	rsmI	16S rRNA 2'O-ribose C1402 methyltransferase
b2512	bamB	outer membrane protein assembly factor BamB
b2571	rseB	anti-sigma factor stabilizing protein RseB
b3465	rsmD	16S rRNA m2G966 methyltransferase
b2897	sdhE	FAD assembly factor
b1266	yciV	RNA/ssDNA 5'-->3' exonuclease
b2188	yejM	putative cardiolipin transport protein
b0055	djlA	co-chaperone protein DjlA
b1304	pspA	phage shock protein A
b2624	alpA	CP4-57 prophage; DNA-binding transcriptional activator AlpA
b3048	yqiI	putative fimbrial protein YqiI
b2635	ypjK	CP4-57 prophage; uncharacterized protein YpjK
b0488	ybbJ	NfeD-like family protein
b2548	yphF	putative ABC transporter periplasmic binding protein YphF
b4614	sokA
b0522	purK	5-(carboxyamino)imidazole ribonucleotide synthase	Nucleotides metabolism				Community-specific interaction-induced fitness
b0523	purE	N5-carboxyaminoimidazole ribonucleotide mutase	Nucleotides metabolism
b1760	ynjH	DUF1496 domain-containing protein YnjH
b3388	damX	cell division protein DamX
b3462	ftsX	cell division protein FtsX	Membrane transport
b3609	secB	SecB chaperone	Folding, sorting and degradation / Membrane transport / Quorum sensing
b2641	ypjM_1	CP4-57 prophage; putative arsenite transporter, N-terminal fragment
b4646	yrdE

## Sheet: Interaction-alleviated fitness
Comparison of E. coli's pairwise-alleviated and community-alleviated genes
bnumber	gene_name	gene product	Kegg module	Alone	Pairwsie	Community
b4111	proP	osmolyte:H+ symporter ProP					Conserved interaction-alleviated fitness			Negative fitness
b0478	ybaL	putative monovalent cation:proton antiporter-2 family transporter YbaL								Not negative fitness
b0484	copA	soluble Cu+ chaperone // Cu+ exporting P-type ATPase
b0197	metQ	L-methionine/D-methionine ABC transporter membrane anchored binding protein	Membrane transport
b1745	astB	N-succinylarginine dihydrolase	Amino acid metabolism
b3172	argG	argininosuccinate synthetase	Amino acid metabolism
b0002	thrA	fused aspartate kinase/homoserine dehydrogenase 1	Amino acid metabolism / Biosynthesis of other secondary metabolites
b0078	ilvH	acetolactate synthase / acetohydroxybutanoate synthase, regulatory subunit	Amino acid metabolism
b0243	proA	glutamate-5-semialdehyde dehydrogenase	Amino acid metabolism / Biosynthesis of other secondary metabolites
b0693	speF	ornithine decarboxylase, degradative	Amino acid metabolism / Metabolism of other amino acids
b0928	aspC	aspartate aminotransferase	Amino acid metabolism / Biosynthesis of other secondary metabolites
b3008	metC	cystathionine-beta-lyase / L-cysteine desulfhydrase	Amino acid metabolism / Metabolism of other amino acids
b3772	ilvA	threonine deaminase	Amino acid metabolism
b3773	ilvY	DNA-binding transcriptional dual regulator IlvY
b3774	ilvC	ketol-acid reductoisomerase (NADP+)	Amino acid metabolism / Metabolism of cofactors and vitamins
b3939	metB	O-succinylhomoserine(thiol)-lyase	Energy metabolism / Amino acid metabolism / Metabolism of other amino acids
b0077	ilvI	acetolactate synthase / acetohydroxybutanoate synthase, catalytic subunit	Amino acid metabolism / Metabolism of cofactors and vitamins
b3770	ilvE	branched-chain-amino-acid aminotransferase	Amino acid metabolism
b3771	ilvD	dihydroxy-acid dehydratase	Amino acid metabolism / Metabolism of cofactors and vitamins
b2764	cysJ	sulfite reductase, flavoprotein subunit	Energy metabolism
b1991	cobT	nicotinate-nucleotide&mdash;dimethylbenzimidazole phosphoribosyltransferase	Metabolism of cofactors and vitamins
b0061	araD	L-ribulose-5-phosphate 4-epimerase AraD	Carbohydrate metabolism
b0826	moeB	molybdopterin-synthase adenylyltransferase	Folding, sorting and degradation
b3429	glgA	glycogen synthase	Carbohydrate metabolism / Biofilm formation
b3726	pstA	phosphate ABC transporter membrane subunit PstA	Membrane transport
b3784	rfe	UDP-N-acetylglucosamine-undecaprenyl-phosphate N-acetylglucosaminephosphotransferase
b3785	wzzE	enterobacterial common antigen polysaccharide co-polymerase
b3787	wecC	UDP-N-acetyl-D-mannosamine dehydrogenase	Carbohydrate metabolism
b4481	rffT	4-acetamido-4,6-dideoxy-D-galactose transferase
b0092	ddlB	D-alanine—D-alanine ligase B	Glycan biosynthesis and metabolism / Metabolism of other amino acids
b0632	dacA	D-alanyl-D-alanine carboxypeptidase DacA	Glycan biosynthesis and metabolism
b0212	gloB	hydroxyacylglutathione hydrolase GloB	Carbohydrate metabolism
b1424	opgD	glucan biosynthesis protein D
b2735	ygbI	putative DeoR-type DNA-binding transcriptional regulator YgbI
b3346	yheO	putative DNA-binding transcriptional regulator YheO
b3753	rbsR	DNA-binding transcriptional dual regulator RbsR
b4390	nadR	DNA-binding transcriptional repressor/NMN adenylyltransferase NadR	Metabolism of cofactors and vitamins
b4480	hdfR	DNA-binding transcriptional dual regulator HdfR
b3210	arcB	sensory histidine kinase ArcB	Signal transduction
b0427	yajR	putative major facilitator superfamily transport protein YajR
b0428	cyoE	heme O synthase	Metabolism of cofactors and vitamins
b0660	ybeZ	PhoH-like protein
b1038	csgF	curli assembly component
b1072	flgA	flagellar basal body P-ring formation protein FlgA	Cell motility
b1109	ndh	NADH:quinone oxidoreductase II	Energy metabolism
b1233	ychJ	NTF2-like domain-containing protein YchJ
b1889	motB	motility protein B	Cell motility
b2521	mstA	3-mercaptopyruvate sulfurtransferase
b3181	greA	transcription elongation factor GreA
b3810	yigA	conserved protein YigA
b4175	hflC	regulator of FtsH protease
b4180	rlmB	23S rRNA 2'-O-ribose G2251 methyltransferase
b3996	nudC	NADH pyrophosphatase	Metabolism of cofactors and vitamins
b0532	sfmD	putative fimbrial usher protein SfmD
b1569	dicC	Qin prophage; DNA-binding transcriptional regulator for DicB
b1780	yeaD	conserved protein YeaD
b2099	yegU	putative ADP-ribosylglycohydrolase YegU
b3232	zapE	cell division factor ZapE with ATPase activity
b3259	prmA	methyltransferase for 50S ribosomal subunit protein L11
b3366	nirD	nitrite reductase subunit NirD	Energy metabolism
b3368	cysG	siroheme synthase subunit	Metabolism of cofactors and vitamins
b4209	ytfE	iron-sulfur cluster repair protein YtfE
b4472	yhdP	AsmA2 domain-containing protein
b4641	yoeH
b3966	btuB	cobalamin/cobinamide outer membrane transporter
b0406	tgt	tRNA-guanine transglycosylase
b0226	dinJ	antitoxin/DNA-binding transcriptional repressor DinJ
b4654	yjdQ
b3960	argH	argininosuccinate lyase	Amino acid metabolism				Pairwise-specific interaction-alleviated fitness
b1693	aroD	3-dehydroquinate dehydratase	Amino acid metabolism
b0758	galT	galactose-1-phosphate uridylyltransferase	Carbohydrate metabolism
b1232	purU	formyltetrahydrofolate deformylase	Carbohydrate metabolism / Metabolism of cofactors and vitamins
b0432	cyoA	cytochrome bo3 ubiquinol oxidase subunit II	Energy metabolism
b2557	purL	phosphoribosylformylglycinamide synthetase	Nucleotides metabolism
b2312	purF	amidophosphoribosyltransferase	Nucleotides metabolism / Amino acids metabolism
b0033	carB	carbamoyl phosphate synthetase subunit &beta;	Nucleotides metabolism / Amino acids metabolism
b3387	dam	DNA adenine methyltransferase	Replication and repair
b1830	prc	tail-specific protease
b3247	rng	RNase G
b4454	rdlD	antisense regulatory RNA RdlD
b0141	yadN	putative fimbrial protein YadN
b3260	dusB	tRNA-dihydrouridine synthase B
b0004	thrC	threonine synthase	Amino acid metabolism / Metabolism of cofactors and vitamins				Community-specific interaction-alleviated fitness
b0312	betB	betaine aldehyde dehydrogenase	Amino acid metabolism
b3032	cpdA	cAMP phosphodiesterase	Nucleotides metabolism
