# Supplementary material for: Changes in the genetic requirements for microbial interactions with increasing community complexity
Source: eLife journal article supplement (doi:10.7554/elife.37072), 2018-09-13
Supplement: supp [file elife-37072-supp-v1.zip › elife_poa_e37072_Supplementary_File_1.xlsx]

## Sheet: Raw data
Raw data - Differential expression analysis, log of FC and adjusted p-values - Community condition versus individual pairwise conditions, Day1 day2 and day 3
In community versus with H. alvei																with G. candidum versus growth alone																with P. camemberti versus growth alone
Day1					Day2					Day3						Day1					Day2					Day3						Day1					Day2					Day3
Gene name	bNumber	log2FC	adj-pvalue		Gene name	bNumber	log2FC	adj-pvalue		Gene name	bNumber	log2FC	adj-pvalue			Gene name	bNumber	log2FC	adj-pvalue		Gene name	bNumber	log2FC	adj-pvalue		Gene name	bNumber	log2FC	adj-pvalue			Gene name	bNumber	log2FC	adj-pvalue		Gene name	bNumber	log2FC	adj-pvalue		Gene name	bNumber	log2FC	adj-pvalue
aaaD		1.01612	NA		aaaD		2.24198	NA		aaaD		1.34639	NA			aaaD		0.502079	NA		aaaD		0.0608222	NA		aaaD		-0.763983	NA			aaaD		0.122216	NA		aaaD		-0.040932	NA		aaaD		-0.66623	NA
aaaE	b1149	-0.235105	0.97305		aaaE	b1149	-1.78443	0.245823		aaaE	b1149	-0.634988	0.958124			aaaE	b1149	0.221779	0.937419		aaaE	b1149	-0.679365	0.916205		aaaE	b1149	-1.21767	0.588911			aaaE	b1149	0.748957	0.861689		aaaE	b1149	-0.0602251	0.978995		aaaE	b1149	1.27892	0.984035
aaeA	b3241	0.0376876	0.995846		aaeA	b3241	0.125859	0.959338		aaeA	b3241	0.602404	0.903221			aaeA	b3241	0.129479	0.952238		aaeA	b3241	0.440236	0.906253		aaeA	b3241	-0.456654	0.787906			aaeA	b3241	-0.203687	0.973152		aaeA	b3241	0.913377	0.332625		aaeA	b3241	0.769852	0.984035
aaeB	b3240	0.181691	0.961729		aaeB	b3240	0.586029	0.517126		aaeB	b3240	-0.0788549	0.988459			aaeB	b3240	0.270632	0.838099		aaeB	b3240	0.481902	0.821193		aaeB	b3240	-0.671769	0.540247			aaeB	b3240	0.805725	0.455543		aaeB	b3240	0.838151	0.206507		aaeB	b3240	0.36561	0.986829
aaeR	b3243	0.182772	0.96293		aaeR	b3243	-0.367532	0.817784		aaeR	b3243	-0.206435	0.972653			aaeR	b3243	0.0426632	0.980787		aaeR	b3243	-0.238811	0.957531		aaeR	b3243	-0.332747	0.839461			aaeR	b3243	0.950947	0.440452		aaeR	b3243	-0.297568	0.827811		aaeR	b3243	-0.26849	0.989937
aaeX	b3242	0.66431	0.923258		aaeX	b3242	-0.736805	0.717374		aaeX	b3242	0.892065	0.851284			aaeX	b3242	1.48906	0.504406		aaeX	b3242	-0.511611	0.930973		aaeX	b3242	1.48317	0.452074			aaeX	b3242	0.904767	0.782974		aaeX	b3242	-0.740523	0.667262		aaeX	b3242	1.15381	0.983105
aas	b2836	0.112175	0.969047		aas	b2836	-0.184027	0.886553		aas	b2836	-0.256464	0.957842			aas	b2836	0.400767	0.65604		aas	b2836	-0.0348748	0.985162		aas	b2836	-0.58945	0.451996			aas	b2836	0.147254	0.962566		aas	b2836	-0.0912671	0.938873		aas	b2836	-0.272926	0.986829
aat	b0885	-0.271388	0.956467		aat	b0885	0.464603	0.745672		aat	b0885	0.394529	0.958124			aat	b0885	-0.0914831	0.955245		aat	b0885	0.0948289	0.978051		aat	b0885	-0.758776	0.591536			aat	b0885	0.377764	0.895757		aat	b0885	0.798628	0.407181		aat	b0885	-0.16336	0.990197
abgA	b1338	1.39131	0.575589		abgA	b1338	2.40358	0.0386915		abgA	b1338	0.743825	0.911875			abgA	b1338	1.45998	0.316541		abgA	b1338	1.27788	0.561002		abgA	b1338	-0.306431	0.89484			abgA	b1338	1.56943	0.289329		abgA	b1338	0.152782	0.938999		abgA	b1338	0.0666672	0.990737
abgB	b1337	-0.339534	0.949129		abgB	b1337	0.341136	0.850735		abgB	b1337	0.47634	0.933708			abgB	b1337	-0.291918	0.865845		abgB	b1337	0.0978676	0.978051		abgB	b1337	0.256346	0.874801			abgB	b1337	-0.0529859	0.990849		abgB	b1337	-0.410024	0.749619		abgB	b1337	0.302892	0.989491
abgR	b1339	1.31355	0.345769		abgR	b1339	2.06344	0.0046466		abgR	b1339	2.48591	0.000170426			abgR	b1339	1.62203	0.0589638		abgR	b1339	-0.215509	0.963838		abgR	b1339	1.37249	0.163729			abgR	b1339	0.983146	0.461494		abgR	b1339	-0.745835	0.456071		abgR	b1339	0.278999	0.989491
abgT	b1336	-0.463684	0.933825		abgT	b1336	0.140019	0.965799		abgT	b1336	0.168788	0.98145			abgT	b1336	0.511236	0.813211		abgT	b1336	0.132208	0.978051		abgT	b1336	-0.540601	0.807395			abgT	b1336	-0.0200666	0.996275		abgT	b1336	-0.674016	0.613043		abgT	b1336	0.0198162	0.996884
abrB	b0715	-0.230971	0.957396		abrB	b0715	-0.123492	0.964965		abrB	b0715	-0.221624	0.972996			abrB	b0715	-0.102479	0.951037		abrB	b0715	0.0199357	0.993469		abrB	b0715	0.04815	0.982142			abrB	b0715	-0.0603605	0.988008		abrB	b0715	-0.264543	0.864691		abrB	b0715	-0.046144	0.991513
accA	b0185	-0.673644	0.113997		accA	b0185	0.250688	0.673618		accA	b0185	-0.313837	0.828042			accA	b0185	-0.603305	0.134077		accA	b0185	0.0391068	0.978051		accA	b0185	-0.639633	0.162074			accA	b0185	-0.548305	0.249019		accA	b0185	0.0827794	0.909631		accA	b0185	-0.157496	0.986829
accB	b3255	-1.08492	0.535277		accB	b3255	-0.0205187	0.994331		accB	b3255	-0.798516	0.787253			accB	b3255	-0.956604	0.447285		accB	b3255	-0.0780349	0.97894		accB	b3255	-0.568811	0.689991			accB	b3255	-0.841071	0.689276		accB	b3255	0.771014	0.518688		accB	b3255	-0.366849	0.986829
accC	b3256	-0.622167	0.870081		accC	b3256	-0.788727	0.605205		accC	b3256	-0.903288	0.784372			accC	b3256	-0.639413	0.703062		accC	b3256	-0.76383	0.821785		accC	b3256	-0.990495	0.469586			accC	b3256	-0.353293	0.93697		accC	b3256	0.358841	0.843738		accC	b3256	-0.457178	0.986829
accD	b2316	0.23704	0.9534		accD	b2316	0.503484	0.644044		accD	b2316	0.194214	0.972462			accD	b2316	-0.449435	0.693733		accD	b2316	0.156487	0.965947		accD	b2316	0.0778273	0.947563			accD	b2316	-0.00106041	0.999278		accD	b2316	0.547808	0.564549		accD	b2316	-0.916005	0.836689
aceA	b4015	0.0519607	0.985463		aceA	b4015	0.751757	0.502337		aceA	b4015	0.96	0.573438			aceA	b4015	-0.634818	0.60974		aceA	b4015	0.941238	0.561002		aceA	b4015	0.0289603	0.985564			aceA	b4015	-0.5465	0.813631		aceA	b4015	-0.116884	0.939651		aceA	b4015	0.400486	0.986829
aceB	b4014	0.224366	0.957396		aceB	b4014	0.861272	0.431861		aceB	b4014	1.20717	0.358903			aceB	b4014	-0.540524	0.702108		aceB	b4014	0.889999	0.654515		aceB	b4014	0.761935	0.510319			aceB	b4014	-0.223406	0.962566		aceB	b4014	0.132999	0.938999		aceB	b4014	0.392286	0.986829
aceE	b0114	0.429339	0.870971		aceE	b0114	-0.718717	0.431861		aceE	b0114	-0.156042	0.972848			aceE	b0114	-0.516577	0.647192		aceE	b0114	-0.0423024	0.985162		aceE	b0114	-0.447783	0.675533			aceE	b0114	0.148877	0.973152		aceE	b0114	-1.15309	0.108829		aceE	b0114	-0.366209	0.986829
aceF	b0115	0.0102475	0.997717		aceF	b0115	-1.05083	0.271298		aceF	b0115	-0.283294	0.970424			aceF	b0115	-1.04936	0.322766		aceF	b0115	-0.115587	0.977318		aceF	b0115	-0.0496004	0.971241			aceF	b0115	-0.262929	0.943329		aceF	b0115	-0.980765	0.293436		aceF	b0115	-0.0821007	0.990197
aceK	b4016	0.00386418	0.999441		aceK	b4016	0.416362	0.743025		aceK	b4016	0.800925	0.607476			aceK	b4016	-0.407943	0.755452		aceK	b4016	0.563297	0.816831		aceK	b4016	0.642764	0.524184			aceK	b4016	-0.261599	0.93347		aceK	b4016	0.212841	0.8788		aceK	b4016	0.419924	0.986829
ackA	b2296	-0.719127	0.506531		ackA	b2296	0.0769949	0.965799		ackA	b2296	0.3964	0.886807			ackA	b2296	-0.441061	0.619227		ackA	b2296	-0.579014	0.690149		ackA	b2296	-0.682495	0.340695			ackA	b2296	-0.486906	0.725616		ackA	b2296	0.349857	0.687469		ackA	b2296	0.19066	0.989491
acnA	b1276	0.469894	0.839443		acnA	b1276	-0.585303	0.573412		acnA	b1276	-0.215484	0.970424			acnA	b1276	0.744351	0.457486		acnA	b1276	0.0866018	0.978051		acnA	b1276	0.0368019	0.974921			acnA	b1276	0.0660817	0.986517		acnA	b1276	-1.19607	0.0888694		acnA	b1276	0.191009	0.989937
acnB	b0118	0.05137	0.984662		acnB	b0118	-1.00042	0.197367		acnB	b0118	-0.108294	0.98124			acnB	b0118	-0.304704	0.819165		acnB	b0118	0.596202	0.759275		acnB	b0118	0.385208	0.726228			acnB	b0118	-0.236839	0.941008		acnB	b0118	-1.17146	0.0892429		acnB	b0118	-0.223756	0.989782
acpH	b0404	-0.128765	0.969047		acpH	b0404	-0.652206	0.469959		acpH	b0404	-0.452016	0.913518			acpH	b0404	0.178978	0.892891		acpH	b0404	-0.0301415	0.987172		acpH	b0404	-0.468349	0.727629			acpH	b0404	0.392641	0.833538		acpH	b0404	0.0430189	0.97114		acpH	b0404	-0.235927	0.989937
acpP	b1094	-0.0198795	0.995828		acpP	b1094	-0.115854	0.942086		acpP	b1094	0.00166983	0.999069			acpP	b1094	-0.338765	0.735482		acpP	b1094	-0.324806	0.903624		acpP	b1094	0.537798	0.497758			acpP	b1094	-0.148773	0.965633		acpP	b1094	1.2034	0.0277804		acpP	b1094	0.712737	0.897248
acpS	b2563	-0.450182	0.883619		acpS	b2563	-0.479698	0.785095		acpS	b2563	-0.194053	0.981107			acpS	b2563	0.233193	0.879379		acpS	b2563	0.112445	0.978051		acpS	b2563	1.62236	0.454573			acpS	b2563	0.404628	0.86689		acpS	b2563	-0.393599	0.794172		acpS	b2563	-0.60783	0.986829
acpT	b3475	-0.202888	0.956573		acpT	b3475	-0.360988	0.748695		acpT	b3475	-0.262711	0.970424			acpT	b3475	-0.0690019	0.957074		acpT	b3475	0.138999	0.965947		acpT	b3475	0.344015	0.787201			acpT	b3475	-0.126011	0.973152		acpT	b3475	0.257894	0.816784		acpT	b3475	0.0349241	0.990946
acrA	b0463	-0.078921	0.975493		acrA	b0463	0.312936	0.836056		acrA	b0463	0.0566426	0.991827			acrA	b0463	-0.086122	0.954593		acrA	b0463	-0.49603	0.85598		acrA	b0463	-0.373038	0.757771			acrA	b0463	-0.232415	0.943329		acrA	b0463	0.315756	0.801196		acrA	b0463	0.275804	0.986829
acrB	b0462	-0.421753	0.848761		acrB	b0462	-0.0907395	0.964965		acrB	b0462	-0.294014	0.957842			acrB	b0462	-0.00212259	0.99934		acrB	b0462	-0.932811	0.37897		acrB	b0462	-0.450169	0.644311			acrB	b0462	-0.369524	0.862729		acrB	b0462	0.116779	0.931489		acrB	b0462	0.220247	0.989491
acrD	b2470	-0.403464	0.832032		acrD	b2470	-0.0947609	0.959338		acrD	b2470	-0.397559	0.913481			acrD	b2470	0.199549	0.858165		acrD	b2470	-1.15833	0.0750201		acrD	b2470	-1.33493	0.0819081			acrD	b2470	0.444656	0.763842		acrD	b2470	-0.356535	0.690713		acrD	b2470	-0.118858	0.990197
acrE	b3265	0.514629	NA		acrE	b3265	-0.727471	NA		acrE	b3265	0.267898	NA			acrE	b3265	-1.16259	0.703049		acrE	b3265	-1.60834	NA		acrE	b3265	0.348182	NA			acrE	b3265	0.330776	0.973152		acrE	b3265	-1.56967	NA		acrE	b3265	0.478257	0.989937
acrF	b3266	-0.177536	0.967979		acrF	b3266	-0.169786	0.935398		acrF	b3266	-0.336366	0.970424			acrF	b3266	-0.181921	0.906519		acrF	b3266	-0.34983	0.928231		acrF	b3266	-0.416781	0.807395			acrF	b3266	0.149809	0.973152		acrF	b3266	-0.181112	0.905429		acrF	b3266	-0.336356	0.989491
acrR	b0464	0.410673	0.9178		acrR	b0464	-0.0227612	0.993349		acrR	b0464	-0.0162777	0.996787			acrR	b0464	0.0289517	0.987628		acrR	b0464	-0.510455	0.874873		acrR	b0464	-0.446982	0.771766			acrR	b0464	-0.261381	0.943329		acrR	b0464	0.172952	0.915151		acrR	b0464	-0.0911751	0.990197
acrS	b3264	-3.20413	NA		acrS	b3264	-0.0344799	NA		acrS	b3264	1.34675	NA			acrS	b3264	-2.49438	NA		acrS	b3264	-0.449708	NA		acrS	b3264	1.01156	NA			acrS	b3264	-1.86224	NA		acrS	b3264	2.78557	NA		acrS	b3264	-1.35732	NA
acrZ	b0762	0.624788	0.915699		acrZ	b0762	0.828723	0.696518		acrZ	b0762	1.05547	0.823403			acrZ	b0762	1.32162	0.502179		acrZ	b0762	-0.991606	0.803816		acrZ	b0762	0.390036	0.865038			acrZ	b0762	0.723522	0.862729		acrZ	b0762	0.543477	0.801969		acrZ	b0762	-0.724355	0.986829
acs	b4069	-1.25782	0.727533		acs	b4069	1.64439	0.324701		acs	b4069	2.46903	0.108149			acs	b4069	0.78893	0.749929		acs	b4069	0.916653	0.867153		acs	b4069	0.186144	0.935947			acs	b4069	-2.12496	0.256845		acs	b4069	2.85052	0.0285897		acs	b4069	0.534538	0.986829
actP	b4067	-1.25176	0.747179		actP	b4067	2.12481	0.168448		actP	b4067	2.03351	0.341007			actP	b4067	0.972108	0.681145		actP	b4067	1.96934	0.416032		actP	b4067	0.443724	0.851599			actP	b4067	-2.2327	0.230568		actP	b4067	3.05602	0.0212802		actP	b4067	0.256746	0.989937
acuI	b3253	-0.5644	0.758772		acuI	b3253	0.831341	0.300275		acuI	b3253	0.0271558	0.996787			acuI	b3253	0.165603	0.89773		acuI	b3253	0.14697	0.965947		acuI	b3253	0.0567043	0.966519			acuI	b3253	-0.362325	0.862729		acuI	b3253	-0.165157	0.894748		acuI	b3253	-0.214528	0.989937
ada	b2213	0.176757	0.96293		ada	b2213	-0.379843	0.789561		ada	b2213	-0.200542	0.972462			ada	b2213	0.29824	0.837882		ada	b2213	-0.252325	0.953015		ada	b2213	-1.10979	0.221508			ada	b2213	0.533843	0.793733		ada	b2213	-0.141456	0.927063		ada	b2213	0.405837	0.986829
add	b1623	0.0544702	0.984662		add	b1623	0.295313	0.840146		add	b1623	0.146929	0.9778			add	b1623	0.102506	0.944209		add	b1623	0.262389	0.941174		add	b1623	-0.217841	0.863014			add	b1623	0.431658	0.83687		add	b1623	0.0808164	0.953048		add	b1623	-0.198861	0.989937
ade	b3665	-0.0678611	0.984662		ade	b3665	-0.336259	0.873028		ade	b3665	-1.48421	0.596755			ade	b3665	0.331455	0.854835		ade	b3665	0.104654	0.978051		ade	b3665	-1.03748	0.599482			ade	b3665	0.105199	0.980845		ade	b3665	0.278155	0.876976		ade	b3665	-0.55307	0.986829
adhE	b1241	0.411942	0.832032		adhE	b1241	0.426944	0.65486		adhE	b1241	0.275041	0.957842			adhE	b1241	0.207883	0.855646		adhE	b1241	0.472908	0.805279		adhE	b1241	-0.626701	0.413371			adhE	b1241	0.0477944	0.988008		adhE	b1241	0.13339	0.910248		adhE	b1241	0.146702	0.989937
adhP	b1478	0.27862	0.911252		adhP	b1478	0.57438	0.437698		adhP	b1478	0.694688	0.538482			adhP	b1478	-0.150315	0.895774		adhP	b1478	0.351245	0.88464		adhP	b1478	0.456122	0.566885			adhP	b1478	-0.0966057	0.973152		adhP	b1478	0.032495	0.974451		adhP	b1478	0.0463199	0.990197
adiA	b4117	0.155832	0.969192		adiA	b4117	-0.0573922	0.981996		adiA	b4117	-0.3209	0.970424			adiA	b4117	-0.0983614	0.951755		adiA	b4117	0.275049	0.943641		adiA	b4117	-1.33703	0.22388			adiA	b4117	0.590035	0.763842		adiA	b4117	0.271437	0.833361		adiA	b4117	-0.10067	0.990197
adiC	b4115	-0.549077	0.927605		adiC	b4115	0.998361	0.589267		adiC	b4115	0.500923	0.970424			adiC	b4115	-0.109384	0.969956		adiC	b4115	-0.168887	0.97596		adiC	b4115	-1.5179	0.395548			adiC	b4115	-0.0461619	0.994672		adiC	b4115	0.480467	0.795271		adiC	b4115	0.596072	0.986829
adiY	b4116	1.0374	0.956467		adiY	b4116	0.51839	0.926571		adiY	b4116	3.39161	0.759314			adiY	b4116	3.24432	0.501855		adiY	b4116	-2.46485	0.538121		adiY	b4116	-2.57284	0.531694			adiY	b4116	1.33755	0.890851		adiY	b4116	2.38851	0.383723		adiY	b4116	0.280902	0.990197
adk	b0474	0.217339	0.939569		adk	b0474	0.0921518	0.953065		adk	b0474	0.0297377	0.996787			adk	b0474	-0.591959	0.42985		adk	b0474	0.561427	0.675775		adk	b0474	1.03895	0.0834783			adk	b0474	-0.372733	0.809774		adk	b0474	0.339596	0.677276		adk	b0474	-0.503492	0.983105
aegA	b2468	-0.366793	0.909401		aegA	b2468	-0.566185	0.616066		aegA	b2468	-0.249069	0.972462			aegA	b2468	-0.160897	0.908482		aegA	b2468	-0.40414	0.904903		aegA	b2468	0.497439	0.766523			aegA	b2468	-0.184377	0.961651		aegA	b2468	-0.323859	0.793545		aegA	b2468	-0.546026	0.986829
aer	b3072	-0.0453519	0.984662		aer	b3072	-0.962832	0.154921		aer	b3072	0.330963	0.947311			aer	b3072	0.0638722	0.960504		aer	b3072	0.337551	0.91019		aer	b3072	0.644393	0.538619			aer	b3072	0.139838	0.969807		aer	b3072	-0.00911488	0.990812		aer	b3072	0.148941	0.989937
aes	b0476	0.507138	0.911703		aes	b0476	-0.357744	0.86142		aes	b0476	-0.116728	0.988459			aes	b0476	0.607928	0.708903		aes	b0476	0.497927	0.91019		aes	b0476	0.507412	0.813872			aes	b0476	0.538843	0.861689		aes	b0476	0.570404	0.682926		aes	b0476	-0.0965329	0.990197
afuB	b0263	-1.93529	NA		afuB	b0263	-0.61937	NA		afuB	b0263	-2.24422	NA			afuB	b0263	-1.01257	NA		afuB	b0263	0.432432	NA		afuB	b0263	-0.460103	NA			afuB	b0263	-2.7434	0.689208		afuB	b0263	0.477074	NA		afuB	b0263	-1.9588	NA
afuC	b0262	-0.247463	0.96293		afuC	b0262	-0.652944	0.706119		afuC	b0262	-0.214844	0.981107			afuC	b0262	-0.776616	0.627064		afuC	b0262	0.373659	0.947562		afuC	b0262	-0.940993	0.626885			afuC	b0262	-0.0858958	0.988008		afuC	b0262	0.596416	0.709144		afuC	b0262	-0.102895	0.990197
agaA	b3135	-0.125	0.98465		agaA	b3135	-0.331432	0.926571		agaA	b3135	0.358816	0.981107			agaA	b3135	1.06047	0.661294		agaA	b3135	-0.303402	0.965947		agaA	b3135	-1.99506	0.43231			agaA	b3135	-0.284398	0.969807		agaA	b3135	0.116982	0.963013		agaA	b3135	-0.938754	0.986829
agaB	b3138	-0.486931	NA		agaB	b3138	0.770018	NA		agaB	b3138	-0.415989	NA			agaB	b3138	0.364453	NA		agaB	b3138	-0.481727	NA		agaB	b3138	0.995669	NA			agaB	b3138	-0.346	NA		agaB	b3138	-0.191966	NA		agaB	b3138	0.181475	NA
agaC	b3139	-0.48694	NA		agaC	b3139	-0.983175	NA		agaC	b3139	-0.657307	NA			agaC	b3139	-1.01117	NA		agaC	b3139	-1.18473	NA		agaC	b3139	-0.414892	NA			agaC	b3139	-3.2116	NA		agaC	b3139	-1.29042	NA		agaC	b3139	-0.653512	NA
agaD	b3140	0.182284	NA		agaD	b3140	-0.487246	NA		agaD	b3140	0.580997	NA			agaD	b3140	1.03749	0.707867		agaD	b3140	-0.134553	NA		agaD	b3140	1.97878	NA			agaD	b3140	0.482705	0.943329		agaD	b3140	-0.128448	NA		agaD	b3140	1.87525	0.9763
agaI	b3141	-0.577874	NA		agaI	b3141	-0.902255	NA		agaI	b3141	1.92561	NA			agaI	b3141	1.93597	NA		agaI	b3141	-1.40884	NA		agaI	b3141	-1.43392	NA			agaI	b3141	0.841275	NA		agaI	b3141	-1.42364	NA		agaI	b3141	-0.424195	NA
agaR	b3131	-0.169146	0.956467		agaR	b3131	-0.031445	0.985263		agaR	b3131	0.125248	0.972653			agaR	b3131	-0.521886	0.447285		agaR	b3131	-0.127053	0.964932		agaR	b3131	1.0948	0.0970215			agaR	b3131	-0.136838	0.956174		agaR	b3131	0.016086	0.984442		agaR	b3131	0.145879	0.989937
agaS	b3136	-1.30754	0.657213		agaS	b3136	1.45343	0.483		agaS	b3136	-0.426876	0.972653			agaS	b3136	-0.196662	0.94415		agaS	b3136	0.324889	0.964701		agaS	b3136	-0.0364003	0.992056			agaS	b3136	-0.0643737	0.992717		agaS	b3136	-0.13477	0.95392		agaS	b3136	-0.531666	0.989937
agaV	b3133	1.35156	NA		agaV	b3133	0.453499	NA		agaV	b3133	2.58116	NA			agaV	b3133	2.05288	0.509895		agaV	b3133	-0.833429	NA		agaV	b3133	1.69266	NA			agaV	b3133	0.446455	0.962566		agaV	b3133	-1.51733	NA		agaV	b3133	2.29964	0.959079
agaW	b3134	-2.85888	NA		agaW	b3134	4.11719	NA		agaW	b3134	-0.883139	NA			agaW	b3134	-2.09318	NA		agaW	b3134	1.05486	NA		agaW	b3134	-1.80321	NA			agaW	b3134	-2.72757	0.54824		agaW	b3134	2.35475	NA		agaW	b3134	0.0649623	0.994645
agp	b1002	-0.17935	0.95818		agp	b1002	-0.964475	0.245886		agp	b1002	-0.155626	0.972996			agp	b1002	0.306359	0.820251		agp	b1002	0.355523	0.918257		agp	b1002	0.439716	0.71012			agp	b1002	-0.1577	0.972628		agp	b1002	-0.568877	0.564575		agp	b1002	-0.131054	0.989937
agrA	b4712	2.52289	NA		agrA	b4712	-0.444282	NA		agrA	b4712	1.38315	NA			agrA	b4712	3.37429	NA		agrA	b4712	-0.187858	NA		agrA	b4712	0.993289	NA			agrA	b4712	0.778149	0.930294		agrA	b4712	0.397932	NA		agrA	b4712	-0.32635	0.990197
agrB	b4713	1.48935	NA		agrB	b4713	0.858538	NA		agrB	b4713	3.37034	NA			agrB	b4713	2.34075	NA		agrB	b4713	1.97472	NA		agrB	b4713	-1.66669	NA			agrB	b4713	-0.179928	NA		agrB	b4713	3.45019	NA		agrB	b4713	0.174872	NA
ahpC	b0605	0.374892	0.832032		ahpC	b0605	0.334984	0.71506		ahpC	b0605	-0.0116445	0.996787			ahpC	b0605	-0.138444	0.895774		ahpC	b0605	0.450662	0.779368		ahpC	b0605	0.994167	0.0835913			ahpC	b0605	0.655002	0.480342		ahpC	b0605	0.257013	0.778797		ahpC	b0605	0.216482	0.986829
ahpF	b0606	0.42756	0.864076		ahpF	b0606	1.33165	0.0386915		ahpF	b0606	0.0807629	0.988459			ahpF	b0606	-0.362339	0.772432		ahpF	b0606	0.885502	0.494571		ahpF	b0606	0.0435385	0.971055			ahpF	b0606	0.0559323	0.988008		ahpF	b0606	0.598246	0.508615		ahpF	b0606	0.335299	0.986829
ahr	b4269	0.431953	0.832032		ahr	b4269	0.820219	0.267793		ahr	b4269	0.53325	0.795377			ahr	b4269	0.59916	0.522135		ahr	b4269	0.436438	0.851924		ahr	b4269	0.131512	0.90311			ahr	b4269	0.199028	0.943329		ahr	b4269	-0.242889	0.826692		ahr	b4269	0.152063	0.989937
aidB	b4187	0.169568	0.96293		aidB	b4187	0.187312	0.916459		aidB	b4187	0.111514	0.98124			aidB	b4187	0.43185	0.734398		aidB	b4187	-0.117674	0.973619		aidB	b4187	0.156633	0.899709			aidB	b4187	0.182859	0.967473		aidB	b4187	0.147335	0.923784		aidB	b4187	1.00056	0.82278
ais	b2252	-0.0462832	NA		ais	b2252	1.94055	NA		ais	b2252	-0.674153	NA			ais	b2252	3.78862	0.233894		ais	b2252	0.42668	NA		ais	b2252	-1.0126	NA			ais	b2252	1.53499	0.679941		ais	b2252	0.594714	NA		ais	b2252	1.46512	0.986829
alaA	b2290	-0.0815552	0.977239		alaA	b2290	1.25876	0.0995089		alaA	b2290	0.826948	0.616393			alaA	b2290	0.570795	0.640046		alaA	b2290	0.890151	0.538121		alaA	b2290	1.28159	0.150963			alaA	b2290	0.293698	0.927152		alaA	b2290	-0.134817	0.928123		alaA	b2290	0.163701	0.989937
alaC	b2379	0.0846563	0.973724		alaC	b2379	0.654783	0.314051		alaC	b2379	0.17631	0.970424			alaC	b2379	0.319966	0.729182		alaC	b2379	0.4454	0.788561		alaC	b2379	-0.0189787	0.986489			alaC	b2379	0.0528503	0.984581		alaC	b2379	-1.21268	0.0114015		alaC	b2379	-0.0421106	0.990197
alaE	b2670	-0.440918	0.961729		alaE	b2670	0.604607	0.864787		alaE	b2670	-1.28523	0.873975			alaE	b2670	0.0714661	0.984618		alaE	b2670	-1.54654	0.699867		alaE	b2670	-2.2995	0.296575			alaE	b2670	0.327224	0.973152		alaE	b2670	2.35873	0.180346		alaE	b2670	-1.93043	0.9763
alaS	b2697	-0.157669	0.957396		alaS	b2697	0.38928	0.651974		alaS	b2697	0.191152	0.970424			alaS	b2697	-0.718635	0.293327		alaS	b2697	-0.0916897	0.972127		alaS	b2697	-0.241579	0.788581			alaS	b2697	-0.328214	0.841207		alaS	b2697	-0.0451492	0.963369		alaS	b2697	-0.093985	0.990197
alaT	b3853	2.86492	NA		alaT	b3853	-0.34778	NA		alaT	b3853	0.383339	NA			alaT	b3853	1.48169	0.682396		alaT	b3853	0.241246	NA		alaT	b3853	-0.0296683	NA			alaT	b3853	1.28149	0.838844		alaT	b3853	1.79009	NA		alaT	b3853	0.760954	0.989491
alaU	b3276	2.02722	NA		alaU	b3276	-0.848682	NA		alaU	b3276	2.61226	NA			alaU	b3276	-0.0309804	0.995844		alaU	b3276	0.0165856	0.997654		alaU	b3276	1.74416	NA			alaU	b3276	0.0664767	0.994993		alaU	b3276	1.34118	NA		alaU	b3276	1.48855	0.983105
alaV	b0203	3.59793	NA		alaV	b0203	0.483301	NA		alaV	b0203	2.11689	NA			alaV	b0203	0.73564	0.867768		alaV	b0203	0.839041	NA		alaV	b0203	1.87201	NA			alaV	b0203	0.0969142	0.99367		alaV	b0203	3.15005	NA		alaV	b0203	0.953637	0.986829
alaW	b2397	-0.0314634	0.993172		alaW	b2397	-0.480159	0.716574		alaW	b2397	-0.416095	0.947357			alaW	b2397	-0.919022	0.369025		alaW	b2397	-0.508407	0.867153		alaW	b2397	-1.03066	0.345323			alaW	b2397	-0.0436599	0.992685		alaW	b2397	1.64095	0.0277804		alaW	b2397	-0.456421	0.986829
alaX	b2396	0.864455	0.823273		alaX	b2396	-0.77385	0.687812		alaX	b2396	-0.735457	0.957842			alaX	b2396	0.00677328	0.998781		alaX	b2396	0.607511	0.916233		alaX	b2396	-0.562559	0.852284			alaX	b2396	0.882383	0.727367		alaX	b2396	1.28561	0.379967		alaX	b2396	-0.329547	0.989937
aldA	b1415	-1.17014	0.772443		aldA	b1415	0.710576	0.789561		aldA	b1415	0.752976	0.933708			aldA	b1415	0.0734458	0.982131		aldA	b1415	-0.0700202	0.985954		aldA	b1415	0.323338	0.890889			aldA	b1415	-1.72974	0.455387		aldA	b1415	1.40142	0.419595		aldA	b1415	-0.911441	0.984035
aldB	b3588	-1.79086	0.30913		aldB	b3588	-0.280299	0.924132		aldB	b3588	-0.292458	0.972462			aldB	b3588	-0.444143	0.844166		aldB	b3588	0.0711075	0.985162		aldB	b3588	-1.00137	0.538619			aldB	b3588	-1.74399	0.278461		aldB	b3588	1.32809	0.328418		aldB	b3588	-0.800724	0.984035
alkA	b2068	-0.895485	0.459639		alkA	b2068	0.0619244	0.972287		alkA	b2068	0.9211	0.445689			alkA	b2068	-0.104168	0.94102		alkA	b2068	-0.0913761	0.977318		alkA	b2068	0.500419	0.648474			alkA	b2068	-0.187072	0.948924		alkA	b2068	-0.332639	0.73564		alkA	b2068	0.254177	0.986829
alkB	b2212	0.824136	0.798023		alkB	b2212	-0.228527	0.935398		alkB	b2212	-0.0295142	0.996787			alkB	b2212	1.1613	0.414442		alkB	b2212	-0.692271	0.85598		alkB	b2212	-0.60753	0.735043			alkB	b2212	0.933408	0.665007		alkB	b2212	0.0268576	0.985244		alkB	b2212	1.73043	0.770113
allA	b0505	-0.607667	NA		allA	b0505	-0.856342	NA		allA	b0505	-0.644087	NA			allA	b0505	-0.295514	0.922848		allA	b0505	-1.40107	0.809269		allA	b0505	-2.56972	NA			allA	b0505	-0.510583	0.930294		allA	b0505	-1.42179	NA		allA	b0505	-0.0871223	0.991513
allB	b0512	-2.04246	0.477718		allB	b0512	0.0772687	0.983436		allB	b0512	0.343632	0.972653			allB	b0512	-1.47642	0.513522		allB	b0512	-0.284502	0.964701		allB	b0512	-2.21302	0.201371			allB	b0512	-1.41988	0.676067		allB	b0512	0.635326	0.714115		allB	b0512	-0.718531	0.986829
allC	b0516	-0.129829	0.974994		allC	b0516	1.08162	0.486222		allC	b0516	0.215931	0.981107			allC	b0516	-0.407062	0.838099		allC	b0516	0.457578	0.928231		allC	b0516	0.219843	0.925661			allC	b0516	-0.549389	0.865941		allC	b0516	0.0563203	0.974451		allC	b0516	0.422699	0.989782
allD	b0517	-1.30407	NA		allD	b0517	0.770032	NA		allD	b0517	0.914507	NA			allD	b0517	-1.47649	NA		allD	b0517	-1.8319	NA		allD	b0517	-1.63156	NA			allD	b0517	-1.5674	NA		allD	b0517	-1.68534	NA		allD	b0517	-1.88869	NA
allE	b0515	-0.652457	0.911252		allE	b0515	0.087942	0.984775		allE	b0515	0.794589	0.902741			allE	b0515	0.64216	0.811536		allE	b0515	0.00572208	0.998054		allE	b0515	0.248096	0.91889			allE	b0515	-0.527792	0.906733		allE	b0515	-1.11073	0.508615		allE	b0515	0.785977	0.986829
allR	b0506	-0.398673	0.870081		allR	b0506	0.286198	0.830825		allR	b0506	-0.0270127	0.996787			allR	b0506	-0.487521	0.628246		allR	b0506	-0.217714	0.953015		allR	b0506	-0.970917	0.21907			allR	b0506	-0.273942	0.913193		allR	b0506	0.53146	0.545738		allR	b0506	-0.160822	0.989937
allS	b0504	1.91218	0.645643		allS	b0504	1.11497	0.59032		allS	b0504	0.493342	0.970424			allS	b0504	2.52249	0.246105		allS	b0504	0.760203	0.896451		allS	b0504	-0.47616	0.850822			allS	b0504	0.477702	0.929331		allS	b0504	0.102659	0.963369		allS	b0504	0.196417	0.990197
alpA	b2624	-0.486925	NA		alpA	b2624	2.99604	NA		alpA	b2624	3.37025	NA			alpA	b2624	-1.56057	NA		alpA	b2624	1.51279	NA		alpA	b2624	0.995657	NA			alpA	b2624	-0.956724	NA		alpA	b2624	4.38329	NA		alpA	b2624	2.51305	NA
alr	b4053	0.0528767	0.984662		alr	b4053	-0.185193	0.902888		alr	b4053	0.257245	0.970424			alr	b4053	0.0971188	0.941818		alr	b4053	-0.25442	0.940372		alr	b4053	-0.24429	0.854294			alr	b4053	-0.00219744	0.999278		alr	b4053	0.181469	0.885637		alr	b4053	0.0924171	0.990197
alsA	b4087	0.0205676	NA		alsA	b4087	0.0103509	NA		alsA	b4087	-1.56245	NA			alsA	b4087	1.40264	0.601541		alsA	b4087	-1.20296	NA		alsA	b4087	-2.61519	NA			alsA	b4087	1.66769	0.650289		alsA	b4087	-0.67869	NA		alsA	b4087	-1.44971	0.986829
alsB	b4088	1.86558	NA		alsB	b4088	1.04048	NA		alsB	b4088	-0.395912	NA			alsB	b4088	0.633514	NA		alsB	b4088	2.01892	NA		alsB	b4088	-1.36832	NA			alsB	b4088	0.0381753	0.996097		alsB	b4088	0.735909	NA		alsB	b4088	-2.95825	0.9763
alsC	b4086	-0.393862	NA		alsC	b4086	0.369221	NA		alsC	b4086	-0.119445	NA			alsC	b4086	-1.30954	0.595926		alsC	b4086	0.357986	NA		alsC	b4086	0.232206	NA			alsC	b4086	-0.693271	0.910127		alsC	b4086	-0.199319	NA		alsC	b4086	0.111445	0.990197
alsE	b4085	-0.424399	NA		alsE	b4085	0.112748	NA		alsE	b4085	0.0383781	NA			alsE	b4085	-0.389127	0.892917		alsE	b4085	-0.0746013	NA		alsE	b4085	-1.21278	NA			alsE	b4085	-0.760836	0.856177		alsE	b4085	-0.497957	NA		alsE	b4085	-0.173348	0.990197
alsK	b4084	-1.44783	0.459639		alsK	b4084	0.334322	0.891641		alsK	b4084	0.659634	0.903221			alsK	b4084	-0.727673	0.667822		alsK	b4084	0.180467	0.971858		alsK	b4084	0.281707	0.890009			alsK	b4084	-1.05437	0.595762		alsK	b4084	-0.277742	0.880084		alsK	b4084	0.585347	0.986829
alsR	b4089	-0.273055	0.957396		alsR	b4089	-0.313733	0.883321		alsR	b4089	0.0271325	0.996787			alsR	b4089	0.0636659	0.977597		alsR	b4089	0.0465242	0.985954		alsR	b4089	0.583542	0.771599			alsR	b4089	0.0381187	0.994427		alsR	b4089	-0.157969	0.931489		alsR	b4089	-0.865291	0.983744
alx	b3088	0.472955	0.892643		alx	b3088	0.280011	0.86945		alx	b3088	0.0841829	0.99084			alx	b3088	0.358642	0.81242		alx	b3088	-0.0766684	0.978051		alx	b3088	-0.809618	0.55919			alx	b3088	0.686748	0.712383		alx	b3088	0.800837	0.379119		alx	b3088	0.0669876	0.990197
amiA	b2435	0.0307934	0.985526		amiA	b2435	-0.362501	0.71842		amiA	b2435	-0.0737725	0.988459			amiA	b2435	0.0573575	0.963622		amiA	b2435	-0.148179	0.964932		amiA	b2435	-0.429432	0.722123			amiA	b2435	-0.125335	0.972628		amiA	b2435	0.607851	0.394315		amiA	b2435	-0.0521543	0.990197
amiB	b4169	-0.261672	0.870971		amiB	b4169	-0.29978	0.664654		amiB	b4169	-0.386151	0.817497			amiB	b4169	0.291004	0.673867		amiB	b4169	-0.24261	0.903624		amiB	b4169	-0.521045	0.40492			amiB	b4169	0.091668	0.973152		amiB	b4169	0.249956	0.701881		amiB	b4169	-0.0313148	0.990197
amiC	b2817	-0.281901	0.871318		amiC	b2817	-0.0169471	0.990179		amiC	b2817	-0.496578	0.749828			amiC	b2817	-0.544869	0.392779		amiC	b2817	0.158611	0.953878		amiC	b2817	-0.111059	0.907191			amiC	b2817	-0.347447	0.778548		amiC	b2817	0.0714643	0.938999		amiC	b2817	-0.198883	0.986829
amiD	b0867	0.0319611	0.985526		amiD	b0867	0.123551	0.944352		amiD	b0867	0.182142	0.972462			amiD	b0867	0.623262	0.489549		amiD	b0867	0.208182	0.953016		amiD	b0867	-0.0394946	0.971728			amiD	b0867	0.191847	0.943329		amiD	b0867	-0.525272	0.527807		amiD	b0867	0.0284586	0.991513
amn	b1982	0.52438	0.737575		amn	b1982	-1.34765	0.0153853		amn	b1982	-0.171891	0.972462			amn	b1982	0.525558	0.543901		amn	b1982	-0.0595626	0.978051		amn	b1982	0.849785	0.34206			amn	b1982	0.765457	0.367672		amn	b1982	-1.77039	0.000520492		amn	b1982	-0.161524	0.989937
ampC	b4150	-0.0894767	0.978064		ampC	b4150	0.420624	0.794864		ampC	b4150	0.521278	0.947311			ampC	b4150	0.103018	0.952307		ampC	b4150	0.170237	0.967088		ampC	b4150	0.0268656	0.989603			ampC	b4150	-0.0494607	0.990299		ampC	b4150	0.178301	0.909631		ampC	b4150	-0.574483	0.986829
ampD	b0110	0.236819	0.956467		ampD	b0110	-0.226038	0.886553		ampD	b0110	-0.979785	0.693566			ampD	b0110	-0.178255	0.895774		ampD	b0110	0.503326	0.843825		ampD	b0110	-1.29334	0.297365			ampD	b0110	-0.273406	0.914188		ampD	b0110	-0.112427	0.935897		ampD	b0110	-1.19842	0.929797
ampE	b0111	-0.138442	0.967979		ampE	b0111	-0.503747	0.631028		ampE	b0111	-0.0710759	0.99037			ampE	b0111	0.39813	0.714103		ampE	b0111	0.139174	0.968511		ampE	b0111	-0.286889	0.827661			ampE	b0111	0.107394	0.973152		ampE	b0111	-0.820923	0.258912		ampE	b0111	-0.313075	0.986829
ampG	b0433	-0.848366	0.772443		ampG	b0433	-0.0232786	0.994331		ampG	b0433	-0.0262162	0.996787			ampG	b0433	-0.808922	0.595926		ampG	b0433	-0.619917	0.867153		ampG	b0433	-0.28735	0.879481			ampG	b0433	-0.528443	0.870528		ampG	b0433	0.279774	0.8788		ampG	b0433	-0.523495	0.986829
ampH	b0376	-1.08388	0.832032		ampH	b0376	0.824618	0.777706		ampH	b0376	6.77898	1.9726e-10			ampH	b0376	0.189758	0.953375		ampH	b0376	-0.322548	0.967088		ampH	b0376	6.22548	3.2157e-08			ampH	b0376	-0.603475	0.926393		ampH	b0376	0.388652	0.895772		ampH	b0376	5.72271	4.44109e-07
amtB	b0451	5.58055	0.000156613		amtB	b0451	4.29177	0.00723813		amtB	b0451	4.10881	0.0161851			amtB	b0451	5.22188	0.000538802		amtB	b0451	0.0349906	0.994815		amtB	b0451	1.69768	0.499222			amtB	b0451	5.77885	3.93686e-05		amtB	b0451	-1.86835	0.408757		amtB	b0451	0.661239	0.989491
amyA	b1927	-0.344596	0.899037		amyA	b1927	0.0786195	0.965898		amyA	b1927	1.84797	0.000946612			amyA	b1927	0.353952	0.763925		amyA	b1927	0.214329	0.956068		amyA	b1927	0.974191	0.232001			amyA	b1927	-0.453315	0.801231		amyA	b1927	-0.700074	0.378194		amyA	b1927	0.619796	0.983105
anmK	b1640	-0.409417	0.832032		anmK	b1640	-0.140956	0.929474		anmK	b1640	-0.47388	0.889005			anmK	b1640	-0.344906	0.729182		anmK	b1640	-0.400088	0.867153		anmK	b1640	0.0409905	0.974071			anmK	b1640	-0.393847	0.807278		anmK	b1640	-0.163806	0.885637		anmK	b1640	-0.21007	0.989937
ansA	b1767	0.273544	0.915699		ansA	b1767	0.150217	0.924132		ansA	b1767	-0.0437427	0.991918			ansA	b1767	0.335087	0.728041		ansA	b1767	-0.373363	0.884153		ansA	b1767	-0.343694	0.774587			ansA	b1767	0.220966	0.915197		ansA	b1767	-0.66254	0.328992		ansA	b1767	0.127312	0.989937
ansB	b2957	-0.365334	0.899307		ansB	b2957	0.516682	0.601886		ansB	b2957	0.0619694	0.990431			ansB	b2957	0.133404	0.924831		ansB	b2957	0.102318	0.974041		ansB	b2957	0.0409037	0.971728			ansB	b2957	-0.207554	0.943329		ansB	b2957	0.619534	0.444991		ansB	b2957	0.389826	0.986829
ansP	b1453	0.503578	0.906754		ansP	b1453	0.111582	0.965898		ansP	b1453	0.424069	0.958124			ansP	b1453	0.776781	0.594222		ansP	b1453	-0.0436098	0.985954		ansP	b1453	0.348283	0.850822			ansP	b1453	1.02951	0.503688		ansP	b1453	-0.747456	0.508575		ansP	b1453	-0.453223	0.986829
apaG	b0050	0.126775	0.96293		apaG	b0050	-0.103421	0.946288		apaG	b0050	0.241098	0.958124			apaG	b0050	-0.329234	0.702108		apaG	b0050	-0.0376798	0.984426		apaG	b0050	0.421886	0.64098			apaG	b0050	0.15525	0.946075		apaG	b0050	0.203439	0.830749		apaG	b0050	0.629891	0.9763
apaH	b0049	-0.122238	0.96293		apaH	b0049	0.198967	0.85156		apaH	b0049	0.0378502	0.991827			apaH	b0049	-0.290095	0.725806		apaH	b0049	-0.24673	0.916205		apaH	b0049	-0.202587	0.827527			apaH	b0049	-0.418427	0.722141		apaH	b0049	0.028512	0.973942		apaH	b0049	0.0439624	0.990197
apbE	b2214	0.242933	0.969047		apbE	b2214	-0.0659709	0.984098		apbE	b2214	0.0907574	0.991827			apbE	b2214	-0.102875	0.968254		apbE	b2214	-0.803984	0.821193		apbE	b2214	-0.708222	0.709629			apbE	b2214	0.114415	0.983058		apbE	b2214	1.25712	0.306291		apbE	b2214	0.54735	0.986829
aphA	b4055	-0.705489	0.832032		aphA	b4055	-0.79948	0.63091		aphA	b4055	-0.407109	0.970424			aphA	b4055	-1.03483	0.489549		aphA	b4055	0.494227	0.926164		aphA	b4055	2.19839	0.148925			aphA	b4055	-0.921835	0.712383		aphA	b4055	0.640925	0.694578		aphA	b4055	-0.969408	0.983105
appA	b0980	-0.787638	0.608839		appA	b0980	0.407064	0.743025		appA	b0980	-0.12804	0.981107			appA	b0980	-0.263543	0.846512		appA	b0980	0.478882	0.856246		appA	b0980	-0.56195	0.613085			appA	b0980	-0.0678682	0.984581		appA	b0980	0.112616	0.935897		appA	b0980	0.695275	0.983105
appY	b0564	-2.52815	0.713861		appY	b0564	1.2194	0.688871		appY	b0564	-0.0414104	0.996787			appY	b0564	1.79573	0.778207		appY	b0564	-0.473827	0.96163		appY	b0564	-1.3392	0.705859			appY	b0564	-0.858755	0.943329		appY	b0564	1.71835	0.433231		appY	b0564	-0.0295809	0.997491
apt	b0469	-0.642037	0.897238		apt	b0469	0.307085	0.913593		apt	b0469	-0.586288	0.957248			apt	b0469	-1.07101	0.553717		apt	b0469	-0.629613	0.909354		apt	b0469	-1.20366	0.484761			apt	b0469	-0.591117	0.890851		apt	b0469	0.524451	0.797063		apt	b0469	-0.563241	0.986829
aqpZ	b0875	0.0297406	0.996272		aqpZ	b0875	0.158704	0.952638		aqpZ	b0875	-0.270359	0.972462			aqpZ	b0875	0.676946	0.625862		aqpZ	b0875	-1.71302	0.0657106		aqpZ	b0875	-0.76525	0.572687			aqpZ	b0875	0.570651	0.813631		aqpZ	b0875	-0.930942	0.364417		aqpZ	b0875	-0.192369	0.989937
araC	b0064	-0.776941	0.776766		araC	b0064	0.430465	0.822194		araC	b0064	-0.409441	0.966987			araC	b0064	0.0805056	0.971154		araC	b0064	0.923912	0.691829		araC	b0064	-0.824965	0.599686			araC	b0064	-0.715185	0.755155		araC	b0064	0.406721	0.793545		araC	b0064	-1.4052	0.836689
araD	b0061	-0.386814	NA		araD	b0061	2.06962	NA		araD	b0061	-0.671131	NA			araD	b0061	0.0327275	NA		araD	b0061	-1.5324	NA		araD	b0061	-4.16329	NA			araD	b0061	1.47887	0.845673		araD	b0061	-1.69403	NA		araD	b0061	-1.1474	NA
araE	b2841	-0.471589	0.88974		araE	b2841	0.217896	0.90329		araE	b2841	-0.530597	0.902741			araE	b2841	-0.0374226	0.983468		araE	b2841	0.0248925	0.993469		araE	b2841	-0.292166	0.843069			araE	b2841	-0.5076	0.830194		araE	b2841	0.472649	0.687658		araE	b2841	0.357865	0.986829
araF	b1901	-0.171303	0.974294		araF	b1901	-0.601689	0.837521		araF	b1901	-0.0219226	0.996787			araF	b1901	0.622364	0.814444		araF	b1901	-1.283	0.710141		araF	b1901	-0.340351	0.894184			araF	b1901	-0.135743	0.983058		araF	b1901	-0.440946	0.861929		araF	b1901	0.342654	0.989937
araG	b1900	-0.440014	0.871318		araG	b1900	-0.032356	0.986988		araG	b1900	0.169266	0.972653			araG	b1900	0.13398	0.930837		araG	b1900	-0.0766724	0.978051		araG	b1900	0.353012	0.804165			araG	b1900	-0.0290535	0.994672		araG	b1900	-0.135713	0.922376		araG	b1900	0.335368	0.986829
araH	b4460	-0.361073	0.926829		araH	b4460	0.626271	0.591506		araH	b4460	0.784241	0.723896			araH	b4460	0.0971958	0.954593		araH	b4460	-0.350129	0.918257		araH	b4460	0.223029	0.878961			araH	b4460	0.142995	0.973152		araH	b4460	-0.401885	0.714987		araH	b4460	0.755614	0.983105
araJ	b0396	0.00242955	0.999899		araJ	b0396	0.157716	0.935398		araJ	b0396	-0.084193	0.989896			araJ	b0396	1.47402	0.141597		araJ	b0396	0.291231	0.937985		araJ	b0396	-0.0497968	0.974295			araJ	b0396	-0.0902904	0.978613		araJ	b0396	0.260149	0.838614		araJ	b0396	0.0405829	0.991513
arcA	b4401	-0.132777	0.969192		arcA	b4401	0.403016	0.750279		arcA	b4401	0.255976	0.970424			arcA	b4401	0.196537	0.894126		arcA	b4401	0.464864	0.867153		arcA	b4401	0.175178	0.881906			arcA	b4401	-0.186021	0.964296		arcA	b4401	0.69062	0.444991		arcA	b4401	0.459927	0.984035
arcB	b3210	-0.12273	0.96293		arcB	b3210	-0.687074	0.276404		arcB	b3210	0.0447003	0.991827			arcB	b3210	-0.277072	0.770232		arcB	b3210	-0.0944331	0.971858		arcB	b3210	0.171908	0.863445			arcB	b3210	-0.115016	0.973152		arcB	b3210	-0.509604	0.445256		arcB	b3210	-0.140882	0.989937
arcZ	b4450	-0.134447	0.974294		arcZ	b4450	-0.845942	0.59032		arcZ	b4450	0.894459	0.791249			arcZ	b4450	-0.47231	0.789908		arcZ	b4450	0.0459489	0.987534		arcZ	b4450	1.74752	0.248623			arcZ	b4450	-0.209142	0.973044		arcZ	b4450	-0.202314	0.925136		arcZ	b4450	0.770813	0.984035
arfA	b4550	0.218598	0.97305		arfA	b4550	0.157996	0.965898		arfA	b4550	-0.0311699	0.996787			arfA	b4550	1.79281	0.279304		arfA	b4550	0.0967609	0.984136		arfA	b4550	0.42106	0.859508			arfA	b4550	0.332176	0.962566		arfA	b4550	-0.378625	0.880084		arfA	b4550	-0.46131	0.989491
arfB	b0191	-0.287772	0.949061		arfB	b0191	0.274645	0.870299		arfB	b0191	-0.105801	0.984816			arfB	b0191	0.383724	0.79733		arfB	b0191	0.13921	0.971858		arfB	b0191	-0.0245038	0.986489			arfB	b0191	0.16624	0.973152		arfB	b0191	0.144514	0.925136		arfB	b0191	-0.111802	0.990197
argA	b2818	-0.977344	0.654695		argA	b2818	-1.09205	0.361471		argA	b2818	-0.0482808	0.996787			argA	b2818	-0.210197	0.91265		argA	b2818	-0.64686	0.867153		argA	b2818	-0.39036	0.824074			argA	b2818	-1.39654	0.306362		argA	b2818	-1.21949	0.262966		argA	b2818	0.322078	0.989937
argB	b3959	-0.708679	0.830516		argB	b3959	-0.403765	0.851866		argB	b3959	0.254114	0.972462			argB	b3959	-0.285624	0.89252		argB	b3959	0.55567	0.905198		argB	b3959	0.420349	0.813872			argB	b3959	-0.912551	0.712383		argB	b3959	0.0412128	0.980898		argB	b3959	1.05476	0.9763
argC	b3958	-0.706123	0.848761		argC	b3958	-2.03107	0.0618659		argC	b3958	-1.41625	0.622895			argC	b3958	0.436313	0.838099		argC	b3958	0.331207	0.96163		argC	b3958	-1.4438	0.403656			argC	b3958	-1.18809	0.567063		argC	b3958	-1.18216	0.378194		argC	b3958	-0.439563	0.989491
argD	b3359	-1.12281	0.481383		argD	b3359	-0.742815	0.544997		argD	b3359	0.0956271	0.988459			argD	b3359	0.19953	0.906519		argD	b3359	-0.835874	0.691829		argD	b3359	-0.283512	0.851599			argD	b3359	-1.25016	0.293563		argD	b3359	-0.642673	0.598364		argD	b3359	0.850819	0.9763
argE	b3957	-0.250939	0.956467		argE	b3957	-0.668323	0.548436		argE	b3957	-0.199603	0.972462			argE	b3957	0.0354109	0.983468		argE	b3957	0.634705	0.796964		argE	b3957	0.168667	0.903392			argE	b3957	0.0288932	0.994672		argE	b3957	-0.318772	0.81424		argE	b3957	0.0389603	0.990946
argF	b0273	-2.03434	0.265958		argF	b0273	-1.83016	0.201116		argF	b0273	-0.696571	0.937998			argF	b0273	-0.258267	0.919312		argF	b0273	-0.521085	0.937985		argF	b0273	-1.71361	0.296575			argF	b0273	-3.09256	0.00404119		argF	b0273	-1.8625	0.172311		argF	b0273	0.176532	0.990197
argG	b3172	-0.533875	0.816182		argG	b3172	-0.309872	0.837084		argG	b3172	0.431538	0.903221			argG	b3172	0.168198	0.905451		argG	b3172	0.520444	0.839957		argG	b3172	0.525458	0.626885			argG	b3172	-0.85389	0.495521		argG	b3172	-0.161162	0.910031		argG	b3172	0.326083	0.986829
argH	b3960	-0.447585	0.9178		argH	b3960	-0.66556	0.688535		argH	b3960	-0.0577145	0.99551			argH	b3960	-0.166726	0.938027		argH	b3960	0.0145709	0.997361		argH	b3960	-0.302557	0.859392			argH	b3960	-1.12917	0.546345		argH	b3960	-0.241909	0.904606		argH	b3960	0.220389	0.989937
argI	b4254	-2.63349	0.129737		argI	b4254	-2.31464	0.157743		argI	b4254	-0.654863	0.959511			argI	b4254	-0.152788	0.962133		argI	b4254	-0.883921	0.900858		argI	b4254	-1.79524	0.403656			argI	b4254	-3.58065	0.00376516		argI	b4254	-2.44224	0.112294		argI	b4254	2.41217	0.846841
argK	b2918	-1.22533	NA		argK	b2918	1.13503	NA		argK	b2918	-0.564072	NA			argK	b2918	0.716519	0.820821		argK	b2918	0.29317	0.965947		argK	b2918	-0.973837	NA			argK	b2918	-0.341079	0.966621		argK	b2918	-0.252225	NA		argK	b2918	-0.748678	0.986829
argO	b2923	0.935474	0.535277		argO	b2923	0.676124	0.437698		argO	b2923	-0.22425	0.972462			argO	b2923	-0.00565747	0.997608		argO	b2923	0.517114	0.80648		argO	b2923	-0.107559	0.939434			argO	b2923	0.675536	0.633735		argO	b2923	-0.228234	0.840361		argO	b2923	0.509979	0.986829
argP	b2916	-0.283763	0.956573		argP	b2916	0.257329	0.898677		argP	b2916	0.22903	0.972462			argP	b2916	-0.805696	0.549697		argP	b2916	0.529683	0.896451		argP	b2916	1.73212	0.0892737			argP	b2916	-0.144413	0.973152		argP	b2916	0.126726	0.940029		argP	b2916	0.387282	0.986829
argQ	b2691	0.272479	0.972248		argQ	b2691	1.70815	0.36405		argQ	b2691	-0.555897	0.970424			argQ	b2691	3.12427	0.0454231		argQ	b2691	1.56108	0.684071		argQ	b2691	-2.52617	0.22388			argQ	b2691	1.47672	0.665007		argQ	b2691	3.47695	0.0139493		argQ	b2691	-0.0703048	0.991513
argR	b3237	-0.318871	0.902536		argR	b3237	-0.641341	0.410757		argR	b3237	-0.881674	0.445689			argR	b3237	0.0807773	0.949696		argR	b3237	-0.63902	0.657666		argR	b3237	-0.324297	0.772458			argR	b3237	-0.210506	0.93471		argR	b3237	0.306024	0.75943		argR	b3237	0.0484455	0.990197
argS	b1876	-0.340454	0.918471		argS	b1876	0.145313	0.945999		argS	b1876	0.325717	0.958124			argS	b1876	-0.850994	0.417869		argS	b1876	-0.266413	0.947875		argS	b1876	-0.397533	0.755092			argS	b1876	-0.261924	0.941008		argS	b1876	0.501021	0.662788		argS	b1876	0.269125	0.989491
argT	b2310	2.14941	0.0207996		argT	b2310	2.79128	0.000474058		argT	b2310	3.61134	6.91784e-07			argT	b2310	3.05189	5.98266e-05		argT	b2310	-0.0894378	0.978051		argT	b2310	2.15491	0.0253638			argT	b2310	1.39389	0.314316		argT	b2310	-1.2712	0.232455		argT	b2310	0.347791	0.989491
argU	b0536	3.68448	NA		argU	b0536	-0.413122	NA		argU	b0536	0.0449069	NA			argU	b0536	3.15274	0.369956		argU	b0536	-0.511911	NA		argU	b0536	2.09687	NA			argU	b0536	1.7911	0.650975		argU	b0536	-0.494404	NA		argU	b0536	0.286027	0.990197
argV	b2694	0.0804669	0.985526		argV	b2694	-0.333891	0.928739		argV	b2694	-0.335314	0.972653			argV	b2694	1.75457	0.376791		argV	b2694	-0.507429	0.947562		argV	b2694	-1.02169	0.640016			argV	b2694	0.81187	0.862729		argV	b2694	1.13684	0.570117		argV	b2694	-0.439987	0.989937
argW	b2348	2.49831	NA		argW	b2348	-0.91519	NA		argW	b2348	-0.0724285	NA			argW	b2348	3.34971	NA		argW	b2348	0.745411	NA		argW	b2348	-1.45506	NA			argW	b2348	4.54149	NA		argW	b2348	1.96422	NA		argW	b2348	1.25471	NA
argX	b3796	-0.20948	0.967303		argX	b3796	0.223755	0.928739		argX	b3796	-0.332645	0.970424			argX	b3796	0.507752	0.778485		argX	b3796	-0.497397	0.910903		argX	b3796	-0.372693	0.826771			argX	b3796	0.366433	0.930294		argX	b3796	0.918465	0.451336		argX	b3796	-0.935908	0.9763
argY	b2693	-0.267306	0.96293		argY	b2693	-1.29275	0.362897		argY	b2693	-1.02646	0.787253			argY	b2693	0.846375	0.648979		argY	b2693	-0.0278761	0.993469		argY	b2693	-1.70999	0.21178			argY	b2693	0.655474	0.862729		argY	b2693	1.8393	0.127101		argY	b2693	0.29839	0.989937
argZ	b2692	0.551301	0.9178		argZ	b2692	-0.717108	0.728568		argZ	b2692	0.284866	0.972653			argZ	b2692	-0.539403	0.813211		argZ	b2692	-0.28191	0.96528		argZ	b2692	-0.76895	0.687466			argZ	b2692	1.04006	0.722141		argZ	b2692	1.2989	0.374504		argZ	b2692	0.671447	0.986829
ariR	b1166	-0.508017	0.9178		ariR	b1166	-1.00738	0.597193		ariR	b1166	0.203892	0.98145			ariR	b1166	1.43762	0.343359		ariR	b1166	-1.9633	0.257943		ariR	b1166	-1.21573	0.54646			ariR	b1166	-0.876042	0.763842		ariR	b1166	-1.43951	0.320639		ariR	b1166	2.90535	0.486454
arnA	b2255	0.0698306	0.974294		arnA	b2255	-0.605293	0.417017		arnA	b2255	-0.187317	0.970424			arnA	b2255	0.360779	0.701081		arnA	b2255	-0.319894	0.904903		arnA	b2255	0.631993	0.441121			arnA	b2255	-0.439709	0.763603		arnA	b2255	-0.731943	0.257341		arnA	b2255	0.708008	0.959079
arnB	b2253	0.14916	0.97305		arnB	b2253	-0.591877	0.673618		arnB	b2253	-0.560762	0.902741			arnB	b2253	0.912573	0.447285		arnB	b2253	-0.84482	0.691829		arnB	b2253	-0.183838	0.903392			arnB	b2253	-0.0494534	0.992052		arnB	b2253	-1.06129	0.278672		arnB	b2253	0.211005	0.989937
arnC	b2254	0.485669	0.896265		arnC	b2254	-1.1405	0.261538		arnC	b2254	-0.786965	0.795377			arnC	b2254	1.09343	0.342888		arnC	b2254	-0.465312	0.909881		arnC	b2254	0.321883	0.850822			arnC	b2254	0.0595079	0.990299		arnC	b2254	-1.24066	0.17662		arnC	b2254	0.458308	0.986829
arnD	b2256	-0.374215	0.884907		arnD	b2256	-0.896818	0.277174		arnD	b2256	-0.82227	0.693566			arnD	b2256	0.467922	0.651821		arnD	b2256	0.00489981	0.998054		arnD	b2256	-0.385676	0.79074			arnD	b2256	-0.320478	0.888244		arnD	b2256	-0.491282	0.62877		arnD	b2256	0.307274	0.989491
arnE	b4544	-0.604567	0.871877		arnE	b4544	-0.755211	0.67093		arnE	b4544	-0.604701	0.958124			arnE	b4544	-0.07025	0.977597		arnE	b4544	0.318465	0.96163		arnE	b4544	0.412527	0.881906			arnE	b4544	-0.440346	0.901754		arnE	b4544	-0.655345	0.679344		arnE	b4544	0.400987	0.989937
arnF	b2258	-1.56564	0.506531		arnF	b2258	-0.228056	0.944627		arnF	b2258	0.146783	0.988373			arnF	b2258	-0.409729	0.869841		arnF	b2258	-0.693253	0.887228		arnF	b2258	1.24959	0.540247			arnF	b2258	-1.12629	0.679087		arnF	b2258	-0.498761	0.794172		arnF	b2258	0.365727	0.989937
arnT	b2257	-1.10541	0.248243		arnT	b2257	-0.568429	0.57601		arnT	b2257	-0.102344	0.98145			arnT	b2257	-0.472778	0.655467		arnT	b2257	-0.169253	0.964932		arnT	b2257	-0.108706	0.935947			arnT	b2257	-0.937532	0.29503		arnT	b2257	-0.63795	0.444991		arnT	b2257	0.680013	0.983105
aroA	b0908	-0.0780581	0.982291		aroA	b0908	0.341253	0.840146		aroA	b0908	0.999612	0.525386			aroA	b0908	-0.0977578	0.953307		aroA	b0908	-0.071837	0.978051		aroA	b0908	1.27899	0.176383			aroA	b0908	-0.218363	0.960302		aroA	b0908	-1.4298	0.0649801		aroA	b0908	0.463855	0.986829
aroB	b3389	-0.227939	0.915699		aroB	b3389	0.00183483	0.998179		aroB	b3389	0.0871786	0.981107			aroB	b3389	-0.012738	0.991658		aroB	b3389	0.00134723	0.999146		aroB	b3389	0.0867797	0.920977			aroB	b3389	-0.261428	0.879529		aroB	b3389	0.117919	0.905429		aroB	b3389	0.194239	0.986829
aroC	b2329	-0.51215	0.799391		aroC	b2329	0.353962	0.783892		aroC	b2329	-0.416449	0.906519			aroC	b2329	-0.84673	0.331201		aroC	b2329	0.380986	0.903624		aroC	b2329	0.12715	0.920303			aroC	b2329	-0.348857	0.883921		aroC	b2329	0.119817	0.931489		aroC	b2329	-0.0713567	0.990197
aroD	b1693	0.177097	0.969047		aroD	b1693	0.663956	0.596689		aroD	b1693	-0.515243	0.94977			aroD	b1693	-0.453235	0.729182		aroD	b1693	0.536143	0.856246		aroD	b1693	1.01599	0.604392			aroD	b1693	-0.36131	0.890851		aroD	b1693	-0.110594	0.938999		aroD	b1693	-1.13982	0.9763
aroE	b3281	0.544288	0.832032		aroE	b3281	0.445999	0.726261		aroE	b3281	0.0187755	0.996787			aroE	b3281	0.646075	0.574636		aroE	b3281	0.3848	0.91019		aroE	b3281	0.0253068	0.986489			aroE	b3281	0.114627	0.973152		aroE	b3281	0.306194	0.808439		aroE	b3281	0.259692	0.989491
aroF	b2601	-0.227656	0.957396		aroF	b2601	-0.429621	0.737625		aroF	b2601	-1.00655	0.445392			aroF	b2601	0.242153	0.867768		aroF	b2601	-0.564491	0.821193		aroF	b2601	-0.0521304	0.967792			aroF	b2601	0.192939	0.962566		aroF	b2601	-1.41828	0.0419791		aroF	b2601	-0.0839326	0.990197
aroG	b0754	0.486965	0.772443		aroG	b0754	-0.436562	0.647112		aroG	b0754	0.411194	0.897309			aroG	b0754	-0.508219	0.558316		aroG	b0754	0.815128	0.476187		aroG	b0754	1.3769	0.0555625			aroG	b0754	0.191909	0.943329		aroG	b0754	-0.584654	0.433231		aroG	b0754	-0.623487	0.9763
aroH	b1704	0.308099	0.957396		aroH	b1704	-0.388314	0.861923		aroH	b1704	-0.133131	0.988459			aroH	b1704	0.325403	0.87308		aroH	b1704	-0.296633	0.96163		aroH	b1704	-1.82779	0.132312			aroH	b1704	0.447053	0.91225		aroH	b1704	0.547349	0.738789		aroH	b1704	-0.28945	0.989937
aroK	b3390	-0.559255	0.631987		aroK	b3390	0.26413	0.789561		aroK	b3390	-0.214535	0.961197			aroK	b3390	-0.552685	0.450258		aroK	b3390	0.186704	0.947562		aroK	b3390	0.0844389	0.925666			aroK	b3390	-0.350107	0.813631		aroK	b3390	1.03604	0.0349376		aroK	b3390	0.0877678	0.990197
aroL	b0388	0.522854	0.832032		aroL	b0388	-0.930088	0.277174		aroL	b0388	-0.372845	0.941427			aroL	b0388	-0.0744136	0.963657		aroL	b0388	-0.17196	0.96528		aroL	b0388	0.425841	0.727629			aroL	b0388	0.800102	0.578766		aroL	b0388	-1.33762	0.0602294		aroL	b0388	0.323287	0.986829
aroM	b0390	-0.224203	0.95818		aroM	b0390	-0.199086	0.926672		aroM	b0390	-0.411266	0.951888			aroM	b0390	0.302946	0.855551		aroM	b0390	-0.100302	0.978051		aroM	b0390	-0.312799	0.831067			aroM	b0390	-0.573	0.8157		aroM	b0390	1.7524	0.0285897		aroM	b0390	-0.216071	0.989937
aroP	b0112	-0.128636	0.972611		aroP	b0112	0.00994202	0.995113		aroP	b0112	-0.436164	0.90128			aroP	b0112	0.260445	0.849643		aroP	b0112	-0.869788	0.503783		aroP	b0112	0.857997	0.340695			aroP	b0112	0.0609939	0.988008		aroP	b0112	-1.15384	0.0841223		aroP	b0112	0.284694	0.986829
arpA	b4017	0.598179	0.913068		arpA	b4017	0.687397	0.71506		arpA	b4017	1.45376	0.453485			arpA	b4017	0.0513613	0.98348		arpA	b4017	1.47209	0.494571		arpA	b4017	0.891961	0.579247			arpA	b4017	0.0161444	0.99741		arpA	b4017	0.0320388	0.984936		arpA	b4017	0.454163	0.986829
arrS	b4704	0.645153	0.887887		arrS	b4704	-0.0740449	0.983436		arrS	b4704	0.482714	0.957842			arrS	b4704	1.64843	0.244768		arrS	b4704	-1.37959	0.513815		arrS	b4704	-0.101534	0.958344			arrS	b4704	2.01113	0.119926		arrS	b4704	1.21415	0.360671		arrS	b4704	0.798264	0.984035
arsB	b3502	-0.592326	0.902536		arsB	b3502	0.746533	0.660223		arsB	b3502	-0.00370403	0.999069			arsB	b3502	0.197525	0.93499		arsB	b3502	-0.246331	0.964932		arsB	b3502	-0.263341	0.911887			arsB	b3502	0.534823	0.890851		arsB	b3502	0.108112	0.95392		arsB	b3502	-0.17888	0.990197
arsC	b3503	-0.569078	0.947224		arsC	b3503	1.40407	0.717374		arsC	b3503	1.05468	0.873975			arsC	b3503	-0.665674	0.810874		arsC	b3503	-1.89237	0.579215		arsC	b3503	-0.462503	0.8563			arsC	b3503	-0.668636	0.893465		arsC	b3503	-2.14855	0.230803		arsC	b3503	0.0826277	0.990561
arsR	b3501	0.905819	NA		arsR	b3501	0.445735	NA		arsR	b3501	1.16871	NA			arsR	b3501	-0.651922	0.847556		arsR	b3501	1.12104	NA		arsR	b3501	2.0388	NA			arsR	b3501	-0.272346	0.973152		arsR	b3501	0.622283	NA		arsR	b3501	0.417537	0.989937
artI	b0863	-0.0465063	0.984662		artI	b0863	-1.06013	0.146862		artI	b0863	0.0510424	0.991827			artI	b0863	-0.0828663	0.952238		artI	b0863	0.872058	0.513815		artI	b0863	1.26426	0.149304			artI	b0863	-0.0203075	0.994993		artI	b0863	0.190415	0.883715		artI	b0863	-0.130278	0.989937
artJ	b0860	-0.139287	0.973724		artJ	b0860	-2.81752	0.000275596		artJ	b0860	-1.42524	0.537585			artJ	b0860	0.321512	0.851486		artJ	b0860	-0.819564	0.780715		artJ	b0860	-1.32937	0.384577			artJ	b0860	-0.60604	0.806793		artJ	b0860	-2.21185	0.0114015		artJ	b0860	-0.527107	0.986829
artM	b0861	-0.0792216	0.982291		artM	b0861	-1.02831	0.314051		artM	b0861	-0.357934	0.970424			artM	b0861	0.219824	0.895774		artM	b0861	0.190091	0.965947		artM	b0861	-0.187434	0.916193			artM	b0861	-0.0581029	0.990299		artM	b0861	-0.0314257	0.982529		artM	b0861	-0.847424	0.983105
artP	b0864	0.325531	0.9178		artP	b0864	-0.714588	0.457459		artP	b0864	-0.326558	0.958124			artP	b0864	0.295149	0.833057		artP	b0864	0.862221	0.561002		artP	b0864	0.125198	0.924791			artP	b0864	0.409877	0.862729		artP	b0864	0.255019	0.844582		artP	b0864	-0.611372	0.984035
artQ	b0862	-0.44475	0.785004		artQ	b0862	-1.2464	0.0164974		artQ	b0862	-0.825412	0.58014			artQ	b0862	-0.425254	0.611211		artQ	b0862	0.717816	0.557289		artQ	b0862	-0.364535	0.771766			artQ	b0862	-0.0294071	0.992717		artQ	b0862	0.443323	0.597438		artQ	b0862	-0.673297	0.982285
ascB	b2716	0.181775	0.964279		ascB	b2716	0.4167	0.770401		ascB	b2716	-0.0572688	0.991827			ascB	b2716	0.298407	0.838099		ascB	b2716	-0.372138	0.916205		ascB	b2716	-0.616271	0.652068			ascB	b2716	0.0761297	0.983058		ascB	b2716	-0.110139	0.938999		ascB	b2716	-0.34176	0.986829
ascF	b2715	-0.4268	0.904162		ascF	b2715	0.469116	0.748261		ascF	b2715	0.0290086	0.996787			ascF	b2715	0.218453	0.895774		ascF	b2715	0.354918	0.928231		ascF	b2715	0.378916	0.827133			ascF	b2715	-0.21609	0.958962		ascF	b2715	-0.146201	0.927509		ascF	b2715	-0.498473	0.986829
ascG	b2714	-0.497112	0.871318		ascG	b2714	-0.622252	0.67097		ascG	b2714	-0.413992	0.970424			ascG	b2714	-0.527051	0.690166		ascG	b2714	1.18779	0.527374		ascG	b2714	-0.60439	0.766523			ascG	b2714	-0.832922	0.592788		ascG	b2714	0.0284155	0.984442		ascG	b2714	-0.676611	0.986829
asd	b3433	0.270688	0.940538		asd	b3433	-0.597251	0.551515		asd	b3433	-0.26424	0.970424			asd	b3433	0.495521	0.651821		asd	b3433	0.482841	0.851154		asd	b3433	0.410099	0.709629			asd	b3433	0.732646	0.600407		asd	b3433	-0.364639	0.743753		asd	b3433	-0.132942	0.989937
aslA	b3801	-0.578118	0.82581		aslA	b3801	-0.672032	0.595398		aslA	b3801	0.524666	0.903221			aslA	b3801	0.62552	0.634061		aslA	b3801	-0.708172	0.760983		aslA	b3801	-0.704246	0.577231			aslA	b3801	0.107343	0.974961		aslA	b3801	-0.748097	0.471495		aslA	b3801	0.397176	0.986829
aslB	b3800	0.16462	0.974294		aslB	b3800	-0.106352	0.975552		aslB	b3800	0.0259922	0.996787			aslB	b3800	1.93577	0.307093		aslB	b3800	-0.399189	0.952163		aslB	b3800	-0.297187	0.910085			aslB	b3800	-0.204595	0.973152		aslB	b3800	0.485875	0.811803		aslB	b3800	-0.0871456	0.990197
asmA	b2064	-0.258462	0.899307		asmA	b2064	-0.247196	0.789699		asmA	b2064	0.25778	0.941427			asmA	b2064	-0.690828	0.233743		asmA	b2064	-0.290025	0.896451		asmA	b2064	0.112781	0.900234			asmA	b2064	-0.324164	0.81083		asmA	b2064	-0.403619	0.533615		asmA	b2064	0.114425	0.989937
asnA	b3744	-0.0772274	0.984662		asnA	b3744	-3.25195	5.07593e-05		asnA	b3744	-3.73213	2.74101e-06			asnA	b3744	0.110445	0.957352		asnA	b3744	-1.97049	0.0843704		asnA	b3744	-4.22586	5.07304e-08			asnA	b3744	-0.431793	0.91225		asnA	b3744	-0.834054	0.550502		asnA	b3744	0.891685	0.983744
asnB	b0674	1.3317	0.577446		asnB	b0674	0.467497	0.85156		asnB	b0674	-0.134564	0.988459			asnB	b0674	1.4152	0.357791		asnB	b0674	-3.45898	0.000605512		asnB	b0674	-3.41536	0.000543498			asnB	b0674	1.28348	0.560915		asnB	b0674	-3.7294	4.70818e-05		asnB	b0674	0.946679	0.984035
asnC	b3743	-0.584221	NA		asnC	b3743	-0.0338898	NA		asnC	b3743	-1.69951	NA			asnC	b3743	-1.19979	0.724077		asnC	b3743	0.719914	0.934778		asnC	b3743	-2.51591	NA			asnC	b3743	-1.69725	0.714097		asnC	b3743	1.04514	NA		asnC	b3743	-1.79283	0.984035
asnS	b0930	0.124305	0.969047		asnS	b0930	-0.0614629	0.971741		asnS	b0930	-0.500789	0.819756			asnS	b0930	-0.483059	0.607292		asnS	b0930	-0.0865422	0.977402		asnS	b0930	-0.00628869	0.99458			asnS	b0930	-0.276485	0.906733		asnS	b0930	0.158329	0.894748		asnS	b0930	-0.452002	0.984035
asnT	b1977	-0.107249	NA		asnT	b1977	3.06783	NA		asnT	b1977	0.339248	NA			asnT	b1977	0.0706843	NA		asnT	b1977	0.753296	NA		asnT	b1977	-0.408703	NA			asnT	b1977	-0.436969	NA		asnT	b1977	2.05486	NA		asnT	b1977	-1.10732	NA
asnU	b1986	4.04635	0.407883		asnU	b1986	1.03759	0.68143		asnU	b1986	0.451069	0.972462			asnU	b1986	3.51641	0.298193		asnU	b1986	-0.763429	0.905198		asnU	b1986	-0.125627	0.969042			asnU	b1986	1.57511	0.698382		asnU	b1986	-0.468476	0.855369		asnU	b1986	0.182891	0.990197
asnV	b1989	-0.0391615	NA		asnV	b1989	0.0130735	NA		asnV	b1989	-2.24639	NA			asnV	b1989	0.602925	NA		asnV	b1989	-1.51107	NA		asnV	b1989	-3.23521	NA			asnV	b1989	1.61246	NA		asnV	b1989	0.553428	NA		asnV	b1989	-0.695204	NA
asnW	b1984	0.825352	NA		asnW	b1984	0.0376626	NA		asnW	b1984	-0.193915	NA			asnW	b1984	0.505289	NA		asnW	b1984	0.306142	NA		asnW	b1984	0.0321963	NA			asnW	b1984	1.97152	NA		asnW	b1984	2.98167	NA		asnW	b1984	2.01527	NA
aspA	b4139	-0.686526	0.750989		aspA	b4139	-0.845536	0.400441		aspA	b4139	-0.696613	0.787253			aspA	b4139	-0.192945	0.902027		aspA	b4139	0.280386	0.947562		aspA	b4139	-0.198862	0.879481			aspA	b4139	-0.672672	0.72339		aspA	b4139	0.774517	0.437547		aspA	b4139	-1.22011	0.675501
aspC	b0928	0.0101002	0.997717		aspC	b0928	0.0132635	0.994331		aspC	b0928	0.246216	0.958124			aspC	b0928	-0.337661	0.701081		aspC	b0928	0.170923	0.957531		aspC	b0928	-0.0185833	0.986489			aspC	b0928	-0.386138	0.787132		aspC	b0928	-0.26343	0.770448		aspC	b0928	-0.8033	0.82278
aspS	b1866	-0.099907	0.973724		aspS	b1866	0.525422	0.566454		aspS	b1866	0.0378685	0.993594			aspS	b1866	-0.535402	0.574329		aspS	b1866	0.312513	0.916205		aspS	b1866	0.0680787	0.948916			aspS	b1866	-0.0591993	0.986517		aspS	b1866	0.228456	0.838614		aspS	b1866	-0.0253575	0.991513
aspT	b3760	0.733778	0.892643		aspT	b3760	0.20316	0.951684		aspT	b3760	-0.916495	0.855487			aspT	b3760	2.05661	0.203733		aspT	b3760	-0.548526	0.918257		aspT	b3760	-1.46815	0.356544			aspT	b3760	0.488228	0.918262		aspT	b3760	2.11111	0.0624304		aspT	b3760	-0.293205	0.989937
aspU	b0206	-0.439338	0.956467		aspU	b0206	0.137957	0.965898		aspU	b0206	-0.857439	0.897309			aspU	b0206	1.9137	0.322766		aspU	b0206	-0.620407	0.916205		aspU	b0206	-1.17266	0.529472			aspU	b0206	0.00596967	0.999278		aspU	b0206	2.0557	0.0996867		aspU	b0206	-0.197813	0.990197
aspV	b0216	4.69088	0.173899		aspV	b0216	0.909154	0.684303		aspV	b0216	1.8582	0.462596			aspV	b0216	5.54228	0.0312345		aspV	b0216	-0.300883	0.96523		aspV	b0216	0.523039	0.837701			aspV	b0216	2.59562	0.17686		aspV	b0216	2.59042	0.0568933		aspV	b0216	0.76849	0.986829
asr	b1597	-0.217995	NA		asr	b1597	0.798027	NA		asr	b1597	-0.338872	NA			asr	b1597	0.438534	0.865845		asr	b1597	0.00855536	0.998054		asr	b1597	0.0439361	NA			asr	b1597	0.580987	0.897492		asr	b1597	-0.86629	NA		asr	b1597	-1.56088	0.986829
astA	b1747	4.43648	2.72683e-06		astA	b1747	4.47277	4.6842e-06		astA	b1747	4.97437	4.90842e-08			astA	b1747	4.62287	4.28956e-07		astA	b1747	1.71551	0.414874		astA	b1747	2.97911	0.0109551			astA	b1747	4.0774	1.06999e-05		astA	b1747	-0.44028	0.843738		astA	b1747	0.80829	0.984035
astB	b1745	4.34252	3.42643e-06		astB	b1745	3.79674	0.000101413		astB	b1745	4.63473	3.60697e-07			astB	b1745	4.58082	4.28956e-07		astB	b1745	1.74549	0.37897		astB	b1745	2.72854	0.0239877			astB	b1745	3.65101	0.000109801		astB	b1745	-0.575274	0.780492		astB	b1745	0.934472	0.984035
astC	b1748	4.88422	3.86308e-07		astC	b1748	4.25435	2.19459e-05		astC	b1748	5.0617	8.61029e-08			astC	b1748	4.86332	2.78572e-07		astC	b1748	1.91158	0.319966		astC	b1748	3.12166	0.00977532			astC	b1748	4.36212	5.31473e-06		astC	b1748	-0.100661	0.965022		astC	b1748	0.669885	0.986829
astD	b1746	4.04865	6.32629e-06		astD	b1746	4.20546	4.86305e-06		astD	b1746	4.57653	1.61319e-07			astD	b1746	4.53947	2.10838e-07		astD	b1746	1.76132	0.32011		astD	b1746	2.85859	0.0109551			astD	b1746	3.8421	1.55789e-05		astD	b1746	-0.371435	0.868719		astD	b1746	1.03759	0.983105
astE	b1744	3.28242	0.00619984		astE	b1744	5.25531	3.94042e-06		astE	b1744	4.79374	2.37048e-06			astE	b1744	4.21809	6.13921e-05		astE	b1744	1.64083	0.513815		astE	b1744	2.43098	0.0866843			astE	b1744	2.91042	0.0177851		astE	b1744	-0.185633	0.940029		astE	b1744	0.854106	0.984035
atoA	b2222	-1.51455	NA		atoA	b2222	-0.347682	NA		atoA	b2222	-1.76434	NA			atoA	b2222	-0.814809	NA		atoA	b2222	-0.193892	NA		atoA	b2222	-4.11056	NA			atoA	b2222	-1.31432	0.870654		atoA	b2222	-0.12958	NA		atoA	b2222	-0.970408	0.989782
atoB	b2224	-0.300967	0.95818		atoB	b2224	1.65059	0.277174		atoB	b2224	1.16332	0.757734			atoB	b2224	0.728693	0.72068		atoB	b2224	0.0584303	0.985837		atoB	b2224	-0.598767	0.777093			atoB	b2224	0.406629	0.930294		atoB	b2224	0.206644	0.925136		atoB	b2224	0.610247	0.986829
atoC	b2220	-1.67097	0.553294		atoC	b2220	0.588244	0.826952		atoC	b2220	-2.06488	0.810853			atoC	b2220	-0.974886	0.661938		atoC	b2220	1.1394	0.744762		atoC	b2220	-2.30705	0.517265			atoC	b2220	-0.949074	0.801231		atoC	b2220	0.0147803	0.991685		atoC	b2220	-2.25864	0.983105
atoD	b2221	-0.0311251	NA		atoD	b2221	1.65421	NA		atoD	b2221	-1.77386	NA			atoD	b2221	-0.622209	0.84086		atoD	b2221	-0.695574	NA		atoD	b2221	-4.37261	NA			atoD	b2221	0.478566	0.948924		atoD	b2221	0.804165	NA		atoD	b2221	-2.56781	0.9763
atoE	b2223	1.11631	0.799391		atoE	b2223	-0.0564659	0.98732		atoE	b2223	1.29636	0.759314			atoE	b2223	0.462537	0.851221		atoE	b2223	0.0819984	0.985162		atoE	b2223	-0.863649	0.697264			atoE	b2223	1.02651	0.738048		atoE	b2223	0.228382	0.931489		atoE	b2223	1.17456	0.984035
atoS	b2219	0.147074	0.973072		atoS	b2219	0.848051	0.502054		atoS	b2219	0.67856	0.851284			atoS	b2219	1.39131	0.204248		atoS	b2219	-0.275536	0.953016		atoS	b2219	-0.405835	0.79229			atoS	b2219	0.646837	0.755155		atoS	b2219	0.0434438	0.975887		atoS	b2219	0.63129	0.984035
atpA	b3734	-0.777788	0.747179		atpA	b3734	-1.26656	0.201116		atpA	b3734	-0.278329	0.970424			atpA	b3734	-0.638104	0.651821		atpA	b3734	0.47682	0.905198		atpA	b3734	0.536752	0.69559			atpA	b3734	-0.451308	0.890851		atpA	b3734	0.795643	0.497019		atpA	b3734	-0.0848546	0.990197
atpB	b3738	-0.436222	0.91386		atpB	b3738	-0.83319	0.509866		atpB	b3738	-0.463517	0.937998			atpB	b3738	-0.249379	0.892917		atpB	b3738	0.00833759	0.997654		atpB	b3738	0.0540536	0.971241			atpB	b3738	-0.349465	0.929287		atpB	b3738	0.653175	0.621914		atpB	b3738	-0.694242	0.984035
atpC	b3731	-0.511376	0.832032		atpC	b3731	-1.561	0.0207168		atpC	b3731	-0.420471	0.914811			atpC	b3731	-0.52043	0.659029		atpC	b3731	-0.139063	0.971858		atpC	b3731	0.881997	0.350516			atpC	b3731	-0.853549	0.514615		atpC	b3731	0.857583	0.321156		atpC	b3731	-0.155712	0.989937
atpD	b3732	-0.460321	0.903394		atpD	b3732	-0.937406	0.4132		atpD	b3732	-0.135235	0.98124			atpD	b3732	-0.650851	0.649454		atpD	b3732	-0.119508	0.978051		atpD	b3732	0.330683	0.826771			atpD	b3732	-0.648266	0.794927		atpD	b3732	0.364038	0.817345		atpD	b3732	-0.271933	0.989937
atpE	b3737	-0.0203003	0.997717		atpE	b3737	-0.372301	0.86142		atpE	b3737	-0.12234	0.987662			atpE	b3737	-0.0148883	0.995844		atpE	b3737	-0.143886	0.977318		atpE	b3737	0.123891	0.939434			atpE	b3737	-0.356925	0.930313		atpE	b3737	0.208661	0.916705		atpE	b3737	-0.893544	0.983105
atpF	b3736	-0.717404	0.762657		atpF	b3736	-0.255027	0.893192		atpF	b3736	-0.270351	0.970424			atpF	b3736	-0.761228	0.553717		atpF	b3736	0.374847	0.928231		atpF	b3736	0.203075	0.88604			atpF	b3736	-1.04217	0.452134		atpF	b3736	0.972791	0.321273		atpF	b3736	-0.724333	0.983105
atpG	b3733	-0.658817	0.82116		atpG	b3733	-1.59346	0.0815457		atpG	b3733	-0.489084	0.933708			atpG	b3733	-0.709613	0.60974		atpG	b3733	0.0515492	0.985271		atpG	b3733	0.773846	0.540983			atpG	b3733	-0.577587	0.830194		atpG	b3733	0.597097	0.663511		atpG	b3733	-0.183015	0.989937
atpH	b3735	-0.709975	0.760291		atpH	b3735	-0.892978	0.397902		atpH	b3735	-0.338095	0.958256			atpH	b3735	-1.29836	0.183065		atpH	b3735	0.817866	0.691829		atpH	b3735	0.719515	0.540205			atpH	b3735	-0.962602	0.515489		atpH	b3735	1.27871	0.143122		atpH	b3735	-0.170387	0.989937
atpI	b3739	-0.134862	0.974294		atpI	b3739	-0.174473	0.948191		atpI	b3739	-0.590433	0.903221			atpI	b3739	-0.487548	0.778993		atpI	b3739	-0.288001	0.957531		atpI	b3739	-0.0649415	0.969042			atpI	b3739	-0.344453	0.930294		atpI	b3739	0.442267	0.782555		atpI	b3739	-1.35173	0.82278
avtA	b3572	0.247389	0.956573		avtA	b3572	0.143897	0.949957		avtA	b3572	0.838121	0.657094			avtA	b3572	0.372121	0.806602		avtA	b3572	0.488729	0.88464		avtA	b3572	0.540288	0.656767			avtA	b3572	0.0334652	0.994672		avtA	b3572	-0.642483	0.54095		avtA	b3572	0.148935	0.989937
azoR	b1412	0.593386	0.807283		azoR	b1412	-0.409569	0.798055		azoR	b1412	1.46022	0.101282			azoR	b1412	0.127899	0.93499		azoR	b1412	0.0564661	0.984426		azoR	b1412	1.87439	0.0692269			azoR	b1412	0.832588	0.521539		azoR	b1412	-1.18163	0.158283		azoR	b1412	0.958696	0.959079
azuC	b4663	3.72702	0.222566		azuC	b4663	-1.40363	0.486222		azuC	b4663	1.95329	0.619617			azuC	b4663	1.44268	0.543416		azuC	b4663	0.978369	0.869908		azuC	b4663	1.58699	0.583635			azuC	b4663	5.88685	0.00205948		azuC	b4663	0.760705	0.753341		azuC	b4663	0.831946	0.986829
bacA	b3057	0.345111	0.933439		bacA	b3057	0.117858	0.960169		bacA	b3057	-0.142976	0.981107			bacA	b3057	-0.111005	0.944914		bacA	b3057	-0.331246	0.931415		bacA	b3057	0.066676	0.967123			bacA	b3057	-0.0700512	0.986517		bacA	b3057	-0.203907	0.889414		bacA	b3057	-0.349015	0.986829
baeR	b2079	0.178739	0.95818		baeR	b2079	0.357035	0.784791		baeR	b2079	-0.229621	0.972462			baeR	b2079	-0.360161	0.755452		baeR	b2079	0.182988	0.964234		baeR	b2079	-0.611963	0.613085			baeR	b2079	0.0608402	0.985591		baeR	b2079	-0.385624	0.696195		baeR	b2079	-0.306764	0.986829
baeS	b2078	-0.641486	0.737575		baeS	b2078	-0.846764	0.380621		baeS	b2078	0.207915	0.972462			baeS	b2078	0.206875	0.890225		baeS	b2078	-0.249016	0.957033		baeS	b2078	0.272129	0.855646			baeS	b2078	0.108067	0.973152		baeS	b2078	-0.647284	0.516073		baeS	b2078	0.796979	0.983105
bamA	b0177	0.0230011	0.986573		bamA	b0177	-0.284048	0.717374		bamA	b0177	0.0334146	0.991827			bamA	b0177	0.18947	0.835779		bamA	b0177	0.0799277	0.972127		bamA	b0177	0.329103	0.632492			bamA	b0177	0.180256	0.928697		bamA	b0177	0.243698	0.744557		bamA	b0177	-0.148973	0.989782
bamB	b2512	-0.0917171	0.972611		bamB	b2512	0.2774	0.768493		bamB	b2512	0.116573	0.972653			bamB	b2512	0.155654	0.880818		bamB	b2512	0.0207393	0.989003		bamB	b2512	0.0847361	0.922215			bamB	b2512	-0.021553	0.994672		bamB	b2512	0.629681	0.284809		bamB	b2512	0.11645	0.989937
bamC	b2477	-0.347585	0.832032		bamC	b2477	-0.482079	0.502054		bamC	b2477	-0.577655	0.62166			bamC	b2477	-0.529608	0.477156		bamC	b2477	0.137355	0.964701		bamC	b2477	0.21232	0.813872			bamC	b2477	-0.158673	0.943802		bamC	b2477	0.142821	0.885637		bamC	b2477	-0.0413475	0.990197
bamD	b2595	-0.00499743	0.997717		bamD	b2595	-0.196685	0.850447		bamD	b2595	-0.067995	0.98145			bamD	b2595	-0.338017	0.654402		bamD	b2595	-0.106079	0.965947		bamD	b2595	0.102506	0.907191			bamD	b2595	0.0523127	0.982922		bamD	b2595	-0.135096	0.883198		bamD	b2595	-0.233599	0.986829
bamE	b2617	0.212966	0.911703		bamE	b2617	-0.0908612	0.935398		bamE	b2617	-0.0507922	0.988459			bamE	b2617	0.160786	0.841985		bamE	b2617	0.278773	0.867153		bamE	b2617	0.478328	0.501206			bamE	b2617	0.431635	0.60064		bamE	b2617	-0.000214159	0.999689		bamE	b2617	-0.343445	0.984035
barA	b2786	-0.0865826	0.974294		barA	b2786	-0.0483354	0.982869		barA	b2786	-0.973569	0.622895			barA	b2786	-0.057079	0.971154		barA	b2786	-0.320532	0.918257		barA	b2786	-1.09239	0.356207			barA	b2786	-0.116525	0.973152		barA	b2786	0.0523278	0.964537		barA	b2786	-1.0712	0.948791
basR	b4113	-0.684837	0.710137		basR	b4113	0.635797	0.570012		basR	b4113	0.0188909	0.996787			basR	b4113	0.0784736	0.959686		basR	b4113	0.309303	0.931415		basR	b4113	0.144324	0.925661			basR	b4113	-0.267112	0.929287		basR	b4113	0.158596	0.909948		basR	b4113	0.015314	0.995884
basS	b4112	-0.03296	0.986169		basS	b4112	-0.939762	0.239086		basS	b4112	-0.0557603	0.991827			basS	b4112	0.317236	0.790286		basS	b4112	-0.593193	0.761389		basS	b4112	-0.43569	0.741412			basS	b4112	0.0671035	0.983058		basS	b4112	-1.06547	0.127101		basS	b4112	-0.265259	0.989491
bax	b3570	0.193288	0.915699		bax	b3570	-0.378634	0.515379		bax	b3570	-0.246673	0.906519			bax	b3570	-0.806308	0.0521249		bax	b3570	0.0594207	0.977318		bax	b3570	0.525894	0.32779			bax	b3570	-0.457233	0.560915		bax	b3570	0.64986	0.130611		bax	b3570	0.143465	0.989491
bcp	b2480	-0.0379285	0.985526		bcp	b2480	-0.0182632	0.994331		bcp	b2480	-0.0259531	0.996787			bcp	b2480	0.0964419	0.94695		bcp	b2480	0.507921	0.86567		bcp	b2480	0.476596	0.736307			bcp	b2480	0.127593	0.973152		bcp	b2480	-0.730501	0.421744		bcp	b2480	-0.82575	0.9763
bcr	b2182	-0.192548	0.957396		bcr	b2182	0.213109	0.883144		bcr	b2182	-0.449028	0.897309			bcr	b2182	-0.31984	0.790138		bcr	b2182	-0.595443	0.708564		bcr	b2182	-0.790017	0.367978			bcr	b2182	-0.493358	0.766868		bcr	b2182	0.20112	0.86453		bcr	b2182	-0.224301	0.989491
bcsA	b3533	-0.592608	0.843358		bcsA	b3533	0.349011	0.856779		bcsA	b3533	-0.663367	0.903221			bcsA	b3533	-0.521287	0.728041		bcsA	b3533	0.276349	0.957531		bcsA	b3533	-1.03363	0.518021			bcsA	b3533	-0.473944	0.86689		bcsA	b3533	0.409841	0.779498		bcsA	b3533	-0.236599	0.989937
bcsB	b3532	-0.78625	0.672263		bcsB	b3532	-0.0977892	0.965898		bcsB	b3532	0.538355	0.906057			bcsB	b3532	-0.495225	0.703062		bcsB	b3532	0.123681	0.977318		bcsB	b3532	-0.313942	0.843897			bcsB	b3532	-0.726836	0.682585		bcsB	b3532	0.10242	0.950864		bcsB	b3532	0.896724	0.9763
bcsC	b3530	-0.393085	0.896742		bcsC	b3530	0.193069	0.910343		bcsC	b3530	0.193023	0.972462			bcsC	b3530	0.249458	0.856657		bcsC	b3530	-0.319544	0.928231		bcsC	b3530	-0.506012	0.646331			bcsC	b3530	-0.213154	0.950797		bcsC	b3530	-0.089409	0.951205		bcsC	b3530	0.314035	0.986829
bcsE	b3536	-0.294213	0.899307		bcsE	b3536	-0.68531	0.335379		bcsE	b3536	-0.32769	0.933708			bcsE	b3536	0.254282	0.811536		bcsE	b3536	-0.330966	0.903624		bcsE	b3536	-0.10974	0.920303			bcsE	b3536	0.19828	0.932251		bcsE	b3536	-0.793097	0.208095		bcsE	b3536	0.101689	0.990197
bcsF	b3537	-1.23365	NA		bcsF	b3537	-4.03449	NA		bcsF	b3537	-0.265174	NA			bcsF	b3537	0.626124	NA		bcsF	b3537	-2.26929	NA		bcsF	b3537	-0.671739	NA			bcsF	b3537	-0.352454	0.973152		bcsF	b3537	-3.76574	NA		bcsF	b3537	2.30209	0.983105
bcsG	b3538	-0.873275	0.477688		bcsG	b3538	-0.53344	0.649125		bcsG	b3538	-1.46177	0.220264			bcsG	b3538	-0.0316754	0.983324		bcsG	b3538	-0.0222913	0.993469		bcsG	b3538	-0.656935	0.652715			bcsG	b3538	-0.480664	0.787132		bcsG	b3538	-0.53981	0.598625		bcsG	b3538	-0.822218	0.983105
bcsQ	b3534	-0.821354	0.647191		bcsQ	b3534	-0.622257	0.633238		bcsQ	b3534	-0.470416	0.937998			bcsQ	b3534	0.0130439	0.995844		bcsQ	b3534	-0.342068	0.936999		bcsQ	b3534	-0.485219	0.761702			bcsQ	b3534	-0.46007	0.849585		bcsQ	b3534	-0.182954	0.910031		bcsQ	b3534	0.107973	0.990197
bcsZ	b3531	-0.499728	0.936378		bcsZ	b3531	-1.05559	0.686717		bcsZ	b3531	-0.258662	0.98124			bcsZ	b3531	-0.248914	0.916548		bcsZ	b3531	-1.83544	0.538121		bcsZ	b3531	-0.38244	0.899709			bcsZ	b3531	-0.623117	0.862729		bcsZ	b3531	-1.25931	0.532017		bcsZ	b3531	-0.270073	0.990197
bdcA	b4249	-0.812131	0.768814		bdcA	b4249	0.0611565	0.983436		bdcA	b4249	0.502857	0.957842			bdcA	b4249	-0.467361	0.789523		bdcA	b4249	0.382125	0.936428		bdcA	b4249	0.127903	0.951021			bdcA	b4249	-0.0936375	0.983058		bdcA	b4249	-0.0836125	0.961989		bdcA	b4249	0.388083	0.989491
bdcR	b4251	0.512464	NA		bdcR	b4251	1.02732	NA		bdcR	b4251	0.282468	NA			bdcR	b4251	1.36728	0.525105		bdcR	b4251	-0.827868	NA		bdcR	b4251	2.5602	NA			bdcR	b4251	0.941161	0.786323		bdcR	b4251	-1.35257	NA		bdcR	b4251	-0.0190567	0.997867
bdm	b1481	0.896856	0.82116		bdm	b1481	-0.999553	0.642173		bdm	b1481	0.691739	0.941427			bdm	b1481	0.656253	0.772432		bdm	b1481	-1.12241	0.779368		bdm	b1481	0.635111	0.793726			bdm	b1481	-0.944947	0.769217		bdm	b1481	-2.06871	0.135487		bdm	b1481	0.132698	0.990197
beeE	b1151	0.835823	NA		beeE	b1151	0.167564	NA		beeE	b1151	-0.212017	NA			beeE	b1151	-0.71367	NA		beeE	b1151	1.69186	NA		beeE	b1151	-0.606565	NA			beeE	b1151	-1.91851	0.801231		beeE	b1151	1.54263	NA		beeE	b1151	0.311824	NA
bepA	b2494	-0.292134	0.906545		bepA	b2494	-0.351924	0.724367		bepA	b2494	-0.151027	0.972462			bepA	b2494	0.00267134	0.99934		bepA	b2494	0.119154	0.968911		bepA	b2494	0.143867	0.897407			bepA	b2494	0.00770886	0.99741		bepA	b2494	-0.311598	0.734988		bepA	b2494	-0.159165	0.989937
betA	b0311	-1.0733	0.787532		betA	b0311	0.0574007	0.98732		betA	b0311	-0.229001	0.98124			betA	b0311	-0.390536	0.889738		betA	b0311	1.07363	0.816831		betA	b0311	-0.0810266	0.974071			betA	b0311	0.027758	0.996275		betA	b0311	1.45812	0.379119		betA	b0311	-0.189039	0.990197
betB	b0312	-0.711084	0.896742		betB	b0312	0.699527	0.777706		betB	b0312	0.153603	0.988459			betB	b0312	-0.159371	0.953375		betB	b0312	1.55224	0.561002		betB	b0312	-0.023573	0.992056			betB	b0312	0.188738	0.974961		betB	b0312	1.94854	0.169198		betB	b0312	-0.623155	0.986829
betI	b0313	-0.54915	0.922438		betI	b0313	0.54593	0.837521		betI	b0313	0.542965	0.958124			betI	b0313	0.0240383	0.994812		betI	b0313	1.45005	0.592927		betI	b0313	0.698732	0.757771			betI	b0313	0.383323	0.946075		betI	b0313	2.32876	0.0629855		betI	b0313	-1.033	0.984035
betT	b0314	-0.358096	0.956573		betT	b0314	1.15215	0.447809		betT	b0314	-0.0702117	0.994298			betT	b0314	0.0141849	0.996808		betT	b0314	1.27831	0.610552		betT	b0314	-0.489034	0.807395			betT	b0314	0.191115	0.973152		betT	b0314	1.69892	0.164803		betT	b0314	-0.664373	0.986829
bfd	b3337	0.565677	0.832032		bfd	b3337	0.0220038	0.992235		bfd	b3337	0.273733	0.970424			bfd	b3337	0.94812	0.376938		bfd	b3337	-0.103472	0.977333		bfd	b3337	0.300284	0.837701			bfd	b3337	0.743315	0.655345		bfd	b3337	-0.419351	0.69945		bfd	b3337	-0.247455	0.989937
bfr	b3336	0.236464	0.957396		bfr	b3336	-0.00771146	0.996542		bfr	b3336	0.175509	0.972653			bfr	b3336	0.921295	0.394092		bfr	b3336	-0.837409	0.625512		bfr	b3336	0.124275	0.923065			bfr	b3336	-0.315858	0.916195		bfr	b3336	0.263103	0.849851		bfr	b3336	0.558677	0.984035
bglA	b2901	0.146072	0.957396		bglA	b2901	0.41707	0.618883		bglA	b2901	0.217161	0.970424			bglA	b2901	-0.431975	0.595926		bglA	b2901	0.124658	0.965904		bglA	b2901	-0.252893	0.807395			bglA	b2901	-0.161385	0.94345		bglA	b2901	-0.537865	0.403012		bglA	b2901	-0.392535	0.984035
bglB	b3721	0.267651	NA		bglB	b3721	-0.218954	NA		bglB	b3721	-0.0667271	NA			bglB	b3721	0.669683	NA		bglB	b3721	0.21015	NA		bglB	b3721	-1.98352	NA			bglB	b3721	-0.0441869	NA		bglB	b3721	0.313865	NA		bglB	b3721	-1.4934	NA
bglF	b3722	-0.421213	0.896265		bglF	b3722	-0.302974	0.849916		bglF	b3722	0.792139	0.685534			bglF	b3722	-0.749718	0.485537		bglF	b3722	0.402996	0.906443		bglF	b3722	0.642459	0.591536			bglF	b3722	0.152317	0.973152		bglF	b3722	-0.223642	0.871881		bglF	b3722	0.707721	0.983105
bglG	b3723	-1.53591	NA		bglG	b3723	-3.69456	NA		bglG	b3723	-1.26154	NA			bglG	b3723	1.53078	NA		bglG	b3723	-3.09918	NA		bglG	b3723	-1.63193	NA			bglG	b3723	-0.563944	NA		bglG	b3723	-1.65521	NA		bglG	b3723	-0.930142	NA
bglH	b3720	-1.37165	NA		bglH	b3720	0.668337	NA		bglH	b3720	0.360846	NA			bglH	b3720	-1.10642	NA		bglH	b3720	-1.29266	NA		bglH	b3720	-0.0131026	NA			bglH	b3720	-2.2878	NA		bglH	b3720	-0.530283	NA		bglH	b3720	0.491689	NA
bglJ	b4366	0.423377	0.896265		bglJ	b4366	-0.757399	0.474798		bglJ	b4366	-0.446429	0.938095			bglJ	b4366	0.410636	0.766115		bglJ	b4366	-0.0626957	0.981858		bglJ	b4366	1.09266	0.40426			bglJ	b4366	0.56275	0.778323		bglJ	b4366	-0.327393	0.808439		bglJ	b4366	-0.128289	0.990197
bglX	b2132	-0.339691	0.832032		bglX	b2132	0.521781	0.447809		bglX	b2132	0.0884316	0.98124			bglX	b2132	-0.483503	0.490116		bglX	b2132	-0.330334	0.867153		bglX	b2132	-0.137105	0.890189			bglX	b2132	-0.629659	0.392649		bglX	b2132	-0.573141	0.321273		bglX	b2132	-0.425711	0.984035
bhsA	b1112	1.46688	0.777685		bhsA	b1112	0.326467	0.893212		bhsA	b1112	0.429081	0.970424			bhsA	b1112	1.29312	0.564563		bhsA	b1112	-0.906587	0.748527		bhsA	b1112	-1.43947	0.435755			bhsA	b1112	0.646091	0.883104		bhsA	b1112	0.492288	0.778797		bhsA	b1112	0.265009	0.989937
bioA	b0774	5.14493	2.13335e-06		bioA	b0774	-1.19603	0.514753		bioA	b0774	0.127002	0.990431			bioA	b0774	0.00511029	0.99934		bioA	b0774	-0.15929	0.978051		bioA	b0774	-0.522735	0.818158			bioA	b0774	5.68342	2.01514e-09		bioA	b0774	2.4984	0.0508947		bioA	b0774	-1.03335	0.984035
bioB	b0775	4.73788	2.72683e-06		bioB	b0775	0.27	0.935398		bioB	b0775	1.07711	0.789604			bioB	b0775	-0.103383	0.971547		bioB	b0775	0.855361	0.851154		bioB	b0775	1.06566	0.542454			bioB	b0775	6.06763	2.60834e-11		bioB	b0775	2.46653	0.0339997		bioB	b0775	-0.589243	0.986829
bioC	b0777	5.87541	7.84059e-05		bioC	b0777	-0.992763	0.676849		bioC	b0777	-1.0224	0.902741			bioC	b0777	0.0887242	0.979633		bioC	b0777	0.158278	0.978051		bioC	b0777	-0.91166	0.735043			bioC	b0777	5.26993	2.3125e-06		bioC	b0777	2.19423	0.171993		bioC	b0777	-2.64332	0.571838
bioD	b0778	5.24435	0.000286059		bioD	b0778	-0.903318	0.638041		bioD	b0778	0.965515	0.851284			bioD	b0778	-0.0517887	0.983524		bioD	b0778	0.664607	0.908711		bioD	b0778	1.37267	0.471714			bioD	b0778	5.42541	2.72026e-08		bioD	b0778	1.89473	0.149355		bioD	b0778	-0.960681	0.984035
bioF	b0776	5.27377	1.38593e-06		bioF	b0776	-0.682725	0.783892		bioF	b0776	0.544127	0.958124			bioF	b0776	0.0254653	0.994812		bioF	b0776	0.410544	0.957531		bioF	b0776	0.463644	0.840507			bioF	b0776	5.83971	9.63465e-10		bioF	b0776	2.7576	0.0277804		bioF	b0776	-1.1242	0.983105
bioH	b3412	0.0384616	0.985526		bioH	b3412	0.0512775	0.982373		bioH	b3412	0.580326	0.817497			bioH	b3412	-0.530067	0.578649		bioH	b3412	-0.140515	0.967088		bioH	b3412	0.210317	0.86726			bioH	b3412	-0.246924	0.917847		bioH	b3412	-0.308599	0.777531		bioH	b3412	-0.0976403	0.990197
birA	b3973	0.485867	0.861357		birA	b3973	-0.217066	0.892952		birA	b3973	-0.431226	0.933708			birA	b3973	0.24355	0.858508		birA	b3973	-0.410794	0.896451		birA	b3973	-0.86353	0.443874			birA	b3973	0.0895402	0.97697		birA	b3973	0.231953	0.852392		birA	b3973	0.0116581	0.997491
bisC	b3551	0.174308	0.926157		bisC	b3551	0.203961	0.817784		bisC	b3551	0.472867	0.685534			bisC	b3551	-0.204785	0.772432		bisC	b3551	-0.0887694	0.967088		bisC	b3551	0.586809	0.381132			bisC	b3551	-0.155759	0.915197		bisC	b3551	-0.294886	0.626073		bisC	b3551	0.311856	0.984035
blc	b4149	0.436805	0.82116		blc	b4149	-0.631441	0.437406		blc	b4149	-0.0832863	0.985441			blc	b4149	0.831168	0.264162		blc	b4149	-0.335953	0.905198		blc	b4149	-0.279719	0.808306			blc	b4149	0.243476	0.914188		blc	b4149	-0.753709	0.278672		blc	b4149	-0.375126	0.986829
blr	b4409	0.530632	0.909401		blr	b4409	0.20077	0.937681		blr	b4409	-0.904574	0.851284			blr	b4409	-0.288667	0.880237		blr	b4409	-0.996474	0.635863		blr	b4409	-0.977829	0.586272			blr	b4409	0.478098	0.890851		blr	b4409	0.273599	0.8788		blr	b4409	-0.01289	0.997867
bluF	b1163	0.852312	0.691007		bluF	b1163	-0.944375	0.357971		bluF	b1163	0.378308	0.957842			bluF	b1163	0.911552	0.435723		bluF	b1163	-0.0243114	0.993469		bluF	b1163	1.03653	0.382572			bluF	b1163	0.83699	0.628373		bluF	b1163	-1.13632	0.201517		bluF	b1163	0.0349161	0.991513
bluR	b1162	-0.182104	0.957396		bluR	b1162	-0.667262	0.487795		bluR	b1162	0.439986	0.906519			bluR	b1162	-0.461054	0.670204		bluR	b1162	-0.788888	0.592927		bluR	b1162	0.674002	0.550554			bluR	b1162	-0.577473	0.722141		bluR	b1162	-1.25955	0.0627488		bluR	b1162	0.0550226	0.990197
bolA	b0435	0.440027	0.936378		bolA	b0435	-0.466386	0.830825		bolA	b0435	0.719163	0.89091			bolA	b0435	1.37745	0.322766		bolA	b0435	-1.00216	0.710141		bolA	b0435	0.769298	0.618381			bolA	b0435	0.841819	0.76664		bolA	b0435	-0.0953963	0.963013		bolA	b0435	0.478494	0.986829
borD	b0557	-1.37661	NA		borD	b0557	0.530392	NA		borD	b0557	1.79128	NA			borD	b0557	-0.718405	NA		borD	b0557	-2.54728	NA		borD	b0557	-2.05623	NA			borD	b0557	-1.06018	0.930294		borD	b0557	1.77399	NA		borD	b0557	1.93146	0.986829
brnQ	b0401	0.329954	0.956573		brnQ	b0401	0.67523	0.682346		brnQ	b0401	-0.361348	0.970424			brnQ	b0401	0.468331	0.813211		brnQ	b0401	-0.215221	0.965947		brnQ	b0401	-1.858	0.0866843			brnQ	b0401	0.0599665	0.992052		brnQ	b0401	0.499643	0.764639		brnQ	b0401	-0.114698	0.990197
bsmA	b4189	-0.232074	0.969047		bsmA	b4189	-0.550812	0.817784		bsmA	b4189	-0.0471931	0.996787			bsmA	b4189	0.546721	0.810874		bsmA	b4189	-0.871575	0.830025		bsmA	b4189	-0.523672	0.787201			bsmA	b4189	0.0580776	0.992717		bsmA	b4189	1.09698	0.471495		bsmA	b4189	-0.397576	0.989491
bssR	b0836	0.990195	0.657858		bssR	b0836	1.14774	0.30634		bssR	b0836	0.280355	0.972462			bssR	b0836	1.04927	0.430069		bssR	b0836	-0.371172	0.937985		bssR	b0836	-0.755467	0.566885			bssR	b0836	1.48709	0.238851		bssR	b0836	0.842614	0.494439		bssR	b0836	0.531347	0.986829
bssS	b1060	0.419631	0.936378		bssS	b1060	0.334161	0.884883		bssS	b1060	-0.465396	0.957842			bssS	b1060	0.75316	0.648792		bssS	b1060	-1.77659	0.154573		bssS	b1060	-0.768627	0.599686			bssS	b1060	1.3527	0.394172		bssS	b1060	0.520066	0.753031		bssS	b1060	0.287269	0.989937
btuB	b3966	0.18182	0.964137		btuB	b3966	0.160141	0.93861		btuB	b3966	0.375191	0.957842			btuB	b3966	-0.0902812	0.953375		btuB	b3966	-0.820764	0.592927		btuB	b3966	-0.317958	0.831067			btuB	b3966	-0.00677274	0.998876		btuB	b3966	-0.497755	0.641137		btuB	b3966	-0.297902	0.989491
btuC	b1711	0.018022	0.997717		btuC	b1711	0.036533	0.986966		btuC	b1711	-0.225075	0.972462			btuC	b1711	0.263121	0.847525		btuC	b1711	-0.482067	0.832959		btuC	b1711	-0.833856	0.461088			btuC	b1711	0.283834	0.91225		btuC	b1711	-0.257905	0.819288		btuC	b1711	-0.105691	0.990197
btuD	b1709	-0.163002	0.967979		btuD	b1709	0.259021	0.881911		btuD	b1709	0.0164038	0.996787			btuD	b1709	-0.955914	0.339092		btuD	b1709	0.573783	0.830025		btuD	b1709	0.156606	0.907191			btuD	b1709	-0.78013	0.639034		btuD	b1709	-0.231635	0.874358		btuD	b1709	0.355521	0.986829
btuE	b1710	0.604473	0.789406		btuE	b1710	0.200952	0.908451		btuE	b1710	0.670571	0.773262			btuE	b1710	0.250557	0.864524		btuE	b1710	0.00625152	0.997654		btuE	b1710	0.600031	0.575107			btuE	b1710	-0.0883533	0.980845		btuE	b1710	-0.948039	0.258912		btuE	b1710	0.174053	0.989937
btuF	b0158	0.111409	0.974294		btuF	b0158	-0.661735	0.644044		btuF	b0158	0.800679	0.787253			btuF	b0158	-0.336366	0.83287		btuF	b0158	-0.111229	0.978051		btuF	b0158	0.749014	0.614397			btuF	b0158	0.581472	0.797501		btuF	b0158	-0.0397026	0.978995		btuF	b0158	1.08849	0.970736
btuR	b1270	-0.0954645	0.974294		btuR	b1270	-0.394689	0.759887		btuR	b1270	-1.18835	0.515656			btuR	b1270	0.242053	0.855646		btuR	b1270	-0.824376	0.561002		btuR	b1270	-0.92472	0.501829			btuR	b1270	0.2442	0.930294		btuR	b1270	-0.676633	0.434178		btuR	b1270	-1.28926	0.82278
cadA	b4131	1.02455	0.793993		cadA	b4131	0.109254	0.970433		cadA	b4131	1.01738	0.762309			cadA	b4131	0.757355	0.69652		cadA	b4131	0.787797	0.838781		cadA	b4131	-1.32529	0.339023			cadA	b4131	0.165609	0.973152		cadA	b4131	1.1783	0.34722		cadA	b4131	0.885898	0.984035
cadB	b4132	-2.20722	0.741614		cadB	b4132	0.716264	0.884883		cadB	b4132	-0.557174	0.979553			cadB	b4132	-1.32778	0.772432		cadB	b4132	-0.487875	0.964932		cadB	b4132	-5.54106	0.0551319			cadB	b4132	-0.928318	0.929287		cadB	b4132	0.562005	0.884408		cadB	b4132	0.270192	0.990197
cadC	b4133	-1.68786	0.487343		cadC	b4133	-0.143254	0.965898		cadC	b4133	-0.662478	0.958098			cadC	b4133	0.0521639	0.985737		cadC	b4133	-0.763689	0.863559		cadC	b4133	-0.273179	0.921328			cadC	b4133	-0.44353	0.93471		cadC	b4133	0.337097	0.8788		cadC	b4133	0.551688	0.989491
caiA	b0039	0.107593	0.974294		caiA	b0039	0.0856365	0.965898		caiA	b0039	-0.107451	0.988459			caiA	b0039	-0.536433	0.660066		caiA	b0039	0.924361	0.522912		caiA	b0039	0.139514	0.935131			caiA	b0039	-0.708758	0.679087		caiA	b0039	0.916384	0.256841		caiA	b0039	0.216734	0.989937
caiB	b0038	-0.755873	0.913068		caiB	b0038	0.378228	0.899178		caiB	b0038	-1.15443	0.897309			caiB	b0038	-0.86053	0.735482		caiB	b0038	1.22313	0.730406		caiB	b0038	-1.02476	0.725442			caiB	b0038	-0.844841	0.852211		caiB	b0038	0.147335	0.953048		caiB	b0038	-0.629738	0.989491
caiC	b0037	-0.179059	0.97305		caiC	b0037	-0.686015	0.74438		caiC	b0037	1.19336	0.649666			caiC	b0037	0.286013	0.892917		caiC	b0037	-0.606754	0.91019		caiC	b0037	0.714209	0.727629			caiC	b0037	-0.213347	0.971978		caiC	b0037	-0.247773	0.914885		caiC	b0037	1.68347	0.82278
caiD	b0036	-1.37092	NA		caiD	b0036	-0.151993	NA		caiD	b0036	1.49277	NA			caiD	b0036	-1.76962	0.512891		caiD	b0036	1.3371	NA		caiD	b0036	0.637971	NA			caiD	b0036	-1.36156	0.775731		caiD	b0036	0.574143	NA		caiD	b0036	1.13705	0.986829
caiE	b0035	-0.812299	0.848761		caiE	b0035	-0.0871711	0.986867		caiE	b0035	-1.23629	0.902741			caiE	b0035	-0.428895	0.855551		caiE	b0035	-0.692024	0.918257		caiE	b0035	-1.01024	0.76983			caiE	b0035	-0.64613	0.869601		caiE	b0035	0.512328	0.843738		caiE	b0035	-0.336213	0.990197
caiF	b0034	-0.321893	0.966713		caiF	b0034	-0.463806	0.893192		caiF	b0034	0.301681	0.981107			caiF	b0034	0.280552	0.926742		caiF	b0034	0.00831759	0.998054		caiF	b0034	0.0982184	0.972881			caiF	b0034	0.399071	0.955347		caiF	b0034	0.676115	0.794172		caiF	b0034	0.242589	0.990197
caiT	b0040	2.43877	NA		caiT	b0040	0.575211	NA		caiT	b0040	1.74017	NA			caiT	b0040	1.81875	0.471099		caiT	b0040	0.708508	NA		caiT	b0040	0.255941	NA			caiT	b0040	2.1674	0.401335		caiT	b0040	0.0362035	NA		caiT	b0040	0.712942	0.989937
can	b0126	0.806332	0.248243		can	b0126	-0.301181	0.716982		can	b0126	-0.125352	0.972462			can	b0126	0.187893	0.838099		can	b0126	-0.0562787	0.978051		can	b0126	0.277789	0.748715			can	b0126	0.68048	0.318498		can	b0126	-0.153171	0.867663		can	b0126	-0.341335	0.984035
carA	b0032	3.22539	0.0226123		carA	b0032	-1.87845	0.266336		carA	b0032	1.4392	0.711711			carA	b0032	0.024433	0.995844		carA	b0032	2.51893	0.185954		carA	b0032	0.911635	0.69486			carA	b0032	3.23726	0.0168365		carA	b0032	1.14431	0.569752		carA	b0032	-1.09759	0.984035
carB	b0033	3.11383	0.0130952		carB	b0033	-2.22971	0.112724		carB	b0033	1.36673	0.685534			carB	b0033	-0.20114	0.94415		carB	b0033	2.19159	0.233461		carB	b0033	0.919406	0.647399			carB	b0033	2.47454	0.0974152		carB	b0033	0.915249	0.647318		carB	b0033	-1.06907	0.984035
casA	b2760	-1.23831	0.750989		casA	b2760	0.476718	0.873706		casA	b2760	-1.81903	0.873975			casA	b2760	-0.189106	0.950676		casA	b2760	-0.049362	0.990738		casA	b2760	-0.960187	0.840507			casA	b2760	-0.477263	0.93697		casA	b2760	0.634119	0.770448		casA	b2760	-0.516095	0.989937
casB	b2759	1.21171	NA		casB	b2759	-0.0366774	NA		casB	b2759	0.577013	NA			casB	b2759	1.1699	NA		casB	b2759	-0.248126	NA		casB	b2759	0.105299	NA			casB	b2759	-0.248618	NA		casB	b2759	0.0224573	NA		casB	b2759	1.92063	NA
casC	b2758	0.0792681	NA		casC	b2758	-1.01068	NA		casC	b2758	-2.13277	NA			casC	b2758	0.505495	0.837487		casC	b2758	-0.463181	0.957531		casC	b2758	-1.05612	NA			casC	b2758	-0.241765	0.973152		casC	b2758	-1.32083	NA		casC	b2758	-1.66709	0.984035
casD	b2757	-0.256772	NA		casD	b2757	-0.987716	NA		casD	b2757	-0.0323731	NA			casD	b2757	0.886229	0.807925		casD	b2757	-2.22255	NA		casD	b2757	-0.000603733	NA			casD	b2757	-0.123515	0.988008		casD	b2757	-2.37191	NA		casD	b2757	-0.355241	0.990197
casE	b2756	-0.202044	NA		casE	b2756	0.688943	NA		casE	b2756	0.151992	NA			casE	b2756	-0.366331	0.910332		casE	b2756	0.213065	NA		casE	b2756	1.02691	NA			casE	b2756	-0.127354	0.988008		casE	b2756	-0.021703	NA		casE	b2756	-0.20513	0.990197
cbdA	b0978	-0.614066	0.889907		cbdA	b0978	1.47461	0.205814		cbdA	b0978	-0.742432	0.873975			cbdA	b0978	0.796266	0.655971		cbdA	b0978	0.835818	0.792702		cbdA	b0978	-1.23216	0.356207			cbdA	b0978	0.186354	0.973152		cbdA	b0978	0.959718	0.449605		cbdA	b0978	0.357221	0.989491
cbdB	b0979	0.778104	0.832032		cbdB	b0979	0.390714	0.863184		cbdB	b0979	-0.528579	0.947311			cbdB	b0979	0.0749204	0.977597		cbdB	b0979	0.486088	0.920029		cbdB	b0979	-0.790511	0.623313			cbdB	b0979	0.294057	0.956174		cbdB	b0979	0.489537	0.775051		cbdB	b0979	-0.149003	0.990197
cbdX	b4592	1.69491	NA		cbdX	b4592	0.28626	NA		cbdX	b4592	-0.0940954	NA			cbdX	b4592	1.15975	0.838099		cbdX	b4592	-0.0351448	NA		cbdX	b4592	-0.594175	NA			cbdX	b4592	-0.401449	0.973152		cbdX	b4592	-0.930065	NA		cbdX	b4592	0.897516	0.986829
cbeA	b2004	-1.00319	0.772443		cbeA	b2004	-1.71317	0.339883		cbeA	b2004	-0.798881	0.933708			cbeA	b2004	-0.443245	0.846512		cbeA	b2004	-1.42908	0.691829		cbeA	b2004	0.0186699	0.994318			cbeA	b2004	-0.686087	0.841207		cbeA	b2004	-1.2265	0.526919		cbeA	b2004	-0.245968	0.990197
cbl	b1987	3.74797	0.0033232		cbl	b1987	3.57804	0.00321956		cbl	b1987	4.43777	5.61536e-05			cbl	b1987	3.51051	0.00526179		cbl	b1987	0.0424311	0.993469		cbl	b1987	2.05108	0.209151			cbl	b1987	3.57274	0.00311253		cbl	b1987	-0.703402	0.763548		cbl	b1987	0.922939	0.984035
cbpA	b1000	0.0653816	0.984662		cbpA	b1000	-0.0275361	0.990297		cbpA	b1000	0.248965	0.970424			cbpA	b1000	0.638026	0.607292		cbpA	b1000	-0.0992772	0.978051		cbpA	b1000	0.464999	0.714675			cbpA	b1000	0.214032	0.962566		cbpA	b1000	-0.459582	0.713701		cbpA	b1000	0.619974	0.984035
cbpM	b0999	0.0213521	0.997717		cbpM	b0999	-0.845878	0.409843		cbpM	b0999	-0.448403	0.921187			cbpM	b0999	0.100483	0.952608		cbpM	b0999	-0.0212946	0.993469		cbpM	b0999	-0.293471	0.830699			cbpM	b0999	0.0857918	0.983058		cbpM	b0999	-0.119617	0.938999		cbpM	b0999	0.666778	0.983744
cbrA	b3690	-0.19964	0.973724		cbrA	b3690	-0.745628	0.743105		cbrA	b3690	-2.08628	0.794586			cbrA	b3690	-0.198251	0.938027		cbrA	b3690	-1.08972	0.758038		cbrA	b3690	-2.31843	0.505768			cbrA	b3690	1.02996	0.722141		cbrA	b3690	-0.512543	0.8151		cbrA	b3690	-1.90805	0.984035
cbrB	b3716	0.176357	NA		cbrB	b3716	-3.34287	NA		cbrB	b3716	-1.07231	NA			cbrB	b3716	1.14098	0.661294		cbrB	b3716	-2.55288	NA		cbrB	b3716	-2.94946	NA			cbrB	b3716	1.45326	0.6698		cbrB	b3716	-2.82493	NA		cbrB	b3716	-2.74453	0.9763
cbrC	b3717	2.90149	NA		cbrC	b3717	0.261679	NA		cbrC	b3717	-0.172504	NA			cbrC	b3717	0.686414	0.789908		cbrC	b3717	-1.09371	NA		cbrC	b3717	-0.897458	NA			cbrC	b3717	0.700859	0.862729		cbrC	b3717	-0.431796	NA		cbrC	b3717	-0.0580481	0.991522
cbtA	b2005	-0.797525	0.914581		cbtA	b2005	0.0108067	0.996885		cbtA	b2005	-3.39525	0.479606			cbtA	b2005	2.99932	0.396701		cbtA	b2005	-1.59623	0.561002		cbtA	b2005	-2.9855	0.40492			cbtA	b2005	0.689839	0.91225		cbtA	b2005	1.15514	0.557452		cbtA	b2005	-3.16276	0.941174
cca	b3056	-0.0710704	0.974294		cca	b3056	0.0154499	0.99384		cca	b3056	0.0975696	0.981107			cca	b3056	0.0865751	0.94415		cca	b3056	-0.173347	0.96163		cca	b3056	0.157433	0.874801			cca	b3056	-0.104329	0.973152		cca	b3056	0.362268	0.680575		cca	b3056	0.695948	0.959079
ccmA	b2201	-0.165814	0.973724		ccmA	b2201	-0.376431	0.875086		ccmA	b2201	0.160204	0.98145			ccmA	b2201	-0.30184	0.892533		ccmA	b2201	-1.30183	0.522912		ccmA	b2201	-0.183504	0.92418			ccmA	b2201	0.189991	0.973152		ccmA	b2201	0.485599	0.793409		ccmA	b2201	0.529547	0.986829
ccmB	b2200	-0.985117	0.807608		ccmB	b2200	-0.129098	0.971812		ccmB	b2200	0.263922	0.981107			ccmB	b2200	-1.24228	0.490116		ccmB	b2200	-1.01036	0.786824		ccmB	b2200	-0.0673243	0.98051			ccmB	b2200	-0.740713	0.840585		ccmB	b2200	0.262146	0.917374		ccmB	b2200	0.057608	0.991513
ccmC	b2199	-1.89538	0.589443		ccmC	b2199	0.602208	0.849442		ccmC	b2199	-0.934138	0.970424			ccmC	b2199	-1.35429	0.595926		ccmC	b2199	-0.778791	0.903624		ccmC	b2199	-2.93397	0.381132			ccmC	b2199	-1.68297	0.601072		ccmC	b2199	1.20541	0.526346		ccmC	b2199	-1.25933	0.986829
ccmD	b2198	0.529056	NA		ccmD	b2198	-0.357569	NA		ccmD	b2198	1.04903	NA			ccmD	b2198	-0.569915	NA		ccmD	b2198	-0.437707	NA		ccmD	b2198	3.93691	NA			ccmD	b2198	-0.910933	NA		ccmD	b2198	0.891675	NA		ccmD	b2198	1.81618	NA
ccmE	b2197	-0.659721	NA		ccmE	b2197	0.692652	NA		ccmE	b2197	0.315319	NA			ccmE	b2197	-1.06324	0.675257		ccmE	b2197	-0.18136	0.978051		ccmE	b2197	-0.249011	NA			ccmE	b2197	-1.06342	0.802957		ccmE	b2197	1.00655	NA		ccmE	b2197	0.255582	0.990197
ccmF	b2196	-1.52475	0.328017		ccmF	b2196	1.51347	0.2267		ccmF	b2196	0.232865	0.981107			ccmF	b2196	-0.646484	0.69947		ccmF	b2196	-0.409166	0.930973		ccmF	b2196	-0.640113	0.772458			ccmF	b2196	-1.31663	0.361392		ccmF	b2196	0.695279	0.611336		ccmF	b2196	0.17282	0.990197
ccmH	b2194	-0.876001	0.705026		ccmH	b2194	-1.04383	0.358667		ccmH	b2194	-0.575122	0.933708			ccmH	b2194	-0.456151	0.790286		ccmH	b2194	-0.988662	0.64246		ccmH	b2194	-0.833393	0.614029			ccmH	b2194	-0.435147	0.893465		ccmH	b2194	0.323453	0.845175		ccmH	b2194	0.182127	0.990197
cdaR	b0162	-0.225676	0.95818		cdaR	b0162	-0.0870003	0.971103		cdaR	b0162	-1.19451	0.596755			cdaR	b0162	-0.221838	0.895774		cdaR	b0162	0.329806	0.940372		cdaR	b0162	-0.687857	0.689991			cdaR	b0162	-0.824791	0.633735		cdaR	b0162	0.278895	0.856536		cdaR	b0162	-0.940168	0.983105
cdd	b2143	0.743352	0.645643		cdd	b2143	0.90641	0.272139		cdd	b2143	-0.185443	0.972462			cdd	b2143	0.427854	0.714249		cdd	b2143	-0.113055	0.973619		cdd	b2143	-0.601825	0.563241			cdd	b2143	0.634687	0.704279		cdd	b2143	0.822452	0.298964		cdd	b2143	-0.778573	0.9763
cdh	b3918	0.572428	0.889983		cdh	b3918	-0.157135	0.952638		cdh	b3918	-0.3462	0.970424			cdh	b3918	0.709318	0.63615		cdh	b3918	-0.132075	0.977318		cdh	b3918	-0.745915	0.618381			cdh	b3918	0.616242	0.806793		cdh	b3918	-0.441252	0.756882		cdh	b3918	0.0405758	0.991513
cdsA	b0175	-0.52292	0.793617		cdsA	b0175	-0.162845	0.919589		cdsA	b0175	-0.428173	0.902741			cdsA	b0175	-0.400572	0.72068		cdsA	b0175	-0.152046	0.96528		cdsA	b0175	-0.611441	0.524184			cdsA	b0175	-0.060298	0.987144		cdsA	b0175	0.609732	0.47088		cdsA	b0175	-0.0903356	0.990197
cedA	b1731	1.50429	0.637774		cedA	b1731	0.982577	0.644044		cedA	b1731	-0.931707	0.924756			cedA	b1731	1.30906	0.467738		cedA	b1731	-0.77965	0.867153		cedA	b1731	-1.0479	0.709013			cedA	b1731	1.01961	0.715749		cedA	b1731	0.771256	0.673292		cedA	b1731	-0.698294	0.986829
cfa	b1661	0.614078	0.726328		cfa	b1661	-0.768949	0.354839		cfa	b1661	0.015475	0.996787			cfa	b1661	1.20724	0.0938693		cfa	b1661	-0.428177	0.873361		cfa	b1661	0.399336	0.706614			cfa	b1661	1.15004	0.161038		cfa	b1661	-1.03897	0.143041		cfa	b1661	0.433488	0.984035
chaA	b1216	0.783325	0.769249		chaA	b1216	0.269504	0.893831		chaA	b1216	0.23968	0.972462			chaA	b1216	1.06983	0.388003		chaA	b1216	-1.00891	0.592927		chaA	b1216	-0.286016	0.854294			chaA	b1216	1.05575	0.502192		chaA	b1216	-0.276201	0.871881		chaA	b1216	0.0487886	0.990561
chaB	b1217	1.31584	0.645643		chaB	b1217	0.121081	0.971812		chaB	b1217	-0.498203	0.958697			chaB	b1217	2.57337	0.0457164		chaB	b1217	-0.225067	0.971858		chaB	b1217	0.399038	0.853952			chaB	b1217	1.03285	0.722141		chaB	b1217	-1.19346	0.425514		chaB	b1217	-0.662109	0.986829
chaC	b1218	1.15314	0.525181		chaC	b1218	2.20869	0.00624542		chaC	b1218	1.93301	0.0330978			chaC	b1218	0.863782	0.54003		chaC	b1218	-0.10547	0.978051		chaC	b1218	1.05077	0.381132			chaC	b1218	0.790304	0.72339		chaC	b1218	-0.526338	0.713701		chaC	b1218	1.03383	0.973857
chbA	b1736	0.930996	NA		chbA	b1736	0.990577	NA		chbA	b1736	-0.395174	NA			chbA	b1736	-0.207692	0.94415		chbA	b1736	-1.18657	0.710141		chbA	b1736	-2.76534	NA			chbA	b1736	-0.000619684	0.999612		chbA	b1736	0.153281	NA		chbA	b1736	-3.28208	0.876726
chbB	b1738	1.3954	0.741614		chbB	b1738	1.79193	0.205814		chbB	b1738	0.19964	0.98145			chbB	b1738	1.84147	0.345574		chbB	b1738	0.241607	0.967088		chbB	b1738	0.727174	0.787201			chbB	b1738	0.562514	0.903754		chbB	b1738	1.38065	0.293436		chbB	b1738	-0.853936	0.986829
chbC	b1737	-0.865133	0.848761		chbC	b1737	0.231793	0.949957		chbC	b1737	-0.676042	0.95388			chbC	b1737	-0.425746	0.869689		chbC	b1737	-0.749834	0.88464		chbC	b1737	-1.21089	0.557422			chbC	b1737	-0.846124	0.813631		chbC	b1737	0.534961	0.799851		chbC	b1737	-0.424505	0.989937
chbF	b1734	0.704491	0.902536		chbF	b1734	0.716852	0.684303		chbF	b1734	0.708925	0.933708			chbF	b1734	1.10675	0.564244		chbF	b1734	0.141141	0.977318		chbF	b1734	-0.7553	0.731057			chbF	b1734	-0.0206557	0.996275		chbF	b1734	-0.0623645	0.97114		chbF	b1734	-0.484057	0.987674
chbG	b1733	0.502772	0.899307		chbG	b1733	0.120032	0.964965		chbG	b1733	0.733595	0.791249			chbG	b1733	0.59672	0.671235		chbG	b1733	0.148824	0.971858		chbG	b1733	1.04368	0.413371			chbG	b1733	0.291492	0.930313		chbG	b1733	-0.419609	0.743753		chbG	b1733	1.02698	0.959079
chbR	b1735	-0.419902	0.952141		chbR	b1735	1.33452	0.441571		chbR	b1735	-0.869705	0.933708			chbR	b1735	-0.134909	0.955245		chbR	b1735	-0.828761	0.835231		chbR	b1735	-0.657858	0.827133			chbR	b1735	-0.557118	0.890851		chbR	b1735	0.568628	0.766239		chbR	b1735	-0.915769	0.986829
cheA	b1888	-1.38355	0.477688		cheA	b1888	-0.62112	0.767382		cheA	b1888	-0.567434	0.970424			cheA	b1888	-0.257596	0.903209		cheA	b1888	-0.339379	0.958019		cheA	b1888	0.573362	0.856372			cheA	b1888	-0.932804	0.679941		cheA	b1888	-0.254314	0.907107		cheA	b1888	0.24622	0.990197
cheB	b1883	-0.794179	NA		cheB	b1883	0.0991215	NA		cheB	b1883	-1.97419	NA			cheB	b1883	1.32408	0.678243		cheB	b1883	0.521065	NA		cheB	b1883	-3.84762	NA			cheB	b1883	-0.931946	0.861868		cheB	b1883	1.1393	NA		cheB	b1883	-1.80611	0.985725
cheR	b1884	-0.581483	NA		cheR	b1884	-0.672188	NA		cheR	b1884	0.493815	NA			cheR	b1884	0.677307	0.813211		cheR	b1884	-1.13192	NA		cheR	b1884	-0.824271	NA			cheR	b1884	0.216002	0.973152		cheR	b1884	-1.05143	NA		cheR	b1884	0.686367	0.986969
cheW	b1887	-0.511858	NA		cheW	b1887	-0.277008	NA		cheW	b1887	-0.533033	NA			cheW	b1887	-0.0232391	0.996003		cheW	b1887	-0.493292	NA		cheW	b1887	-1.38463	NA			cheW	b1887	0.232681	0.974961		cheW	b1887	-0.633909	NA		cheW	b1887	-0.60308	0.989937
cheY	b1882	-1.17239	NA		cheY	b1882	-0.915328	NA		cheY	b1882	2.637	NA			cheY	b1882	-1.62884	0.543416		cheY	b1882	-1.41172	NA		cheY	b1882	2.61386	NA			cheY	b1882	-2.11467	0.43996		cheY	b1882	-2.55327	NA		cheY	b1882	0.608214	0.989491
cheZ	b1881	0.749775	0.859775		cheZ	b1881	0.138268	0.965898		cheZ	b1881	-1.31446	0.873975			cheZ	b1881	-0.453526	0.809705		cheZ	b1881	0.171064	0.973619		cheZ	b1881	-1.00003	0.759539			cheZ	b1881	-0.189196	0.973152		cheZ	b1881	0.0246638	0.98593		cheZ	b1881	-1.04325	0.986829
chiA	b3338	-0.491739	0.799391		chiA	b3338	0.41929	0.687812		chiA	b3338	-0.383645	0.913318			chiA	b3338	0.0636335	0.964635		chiA	b3338	-0.136712	0.965947		chiA	b3338	-0.311962	0.786339			chiA	b3338	-0.0422667	0.990299		chiA	b3338	0.930793	0.163195		chiA	b3338	0.217541	0.989782
chiP	b0681	0.803061	0.892929		chiP	b0681	-0.0961144	0.982621		chiP	b0681	-0.0443914	0.996787			chiP	b0681	1.87684	0.340349		chiP	b0681	-0.123071	0.978051		chiP	b0681	-0.63694	0.829207			chiP	b0681	0.149108	0.97697		chiP	b0681	0.0235606	0.987524		chiP	b0681	-1.08386	0.984035
chiQ	b0682	1.80078	0.6383		chiQ	b0682	-0.0397334	0.990297		chiQ	b0682	-1.31139	0.883491			chiQ	b0682	-0.0557782	0.983324		chiQ	b0682	-0.211612	0.971858		chiQ	b0682	-1.28293	0.672125			chiQ	b0682	1.01035	0.722141		chiQ	b0682	0.498669	0.801089		chiQ	b0682	-1.56536	0.983744
chiX	b4585	0.350166	0.967179		chiX	b4585	-0.915625	0.662961		chiX	b4585	0.927351	0.897309			chiX	b4585	0.352904	0.904089		chiX	b4585	-0.0384502	0.993469		chiX	b4585	4.99838	0.0834783			chiX	b4585	0.650566	0.897492		chiX	b4585	-0.278023	0.914885		chiX	b4585	-0.121017	0.990197
cho	b1741	-0.350534	0.957396		cho	b1741	-0.946106	0.487857		cho	b1741	-0.567538	0.959175			cho	b1741	-0.769573	0.659642		cho	b1741	-0.655875	0.867153		cho	b1741	-1.41694	0.476687			cho	b1741	-0.0491893	0.99367		cho	b1741	-0.432237	0.79577		cho	b1741	-0.923377	0.984035
chpB	b4225	0.388752	0.957396		chpB	b4225	1.48003	0.408551		chpB	b4225	1.98626	0.146475			chpB	b4225	1.08382	0.587824		chpB	b4225	0.306109	0.964701		chpB	b4225	2.06436	0.22388			chpB	b4225	0.690356	0.843634		chpB	b4225	-0.00258309	0.999689		chpB	b4225	1.59607	0.82278
chpS	b4224	0.460229	0.9509		chpS	b4224	0.514468	0.873675		chpS	b4224	2.11292	0.0729914			chpS	b4224	-0.076627	0.978653		chpS	b4224	-1.09357	0.760983		chpS	b4224	1.88833	0.224959			chpS	b4224	0.171936	0.973152		chpS	b4224	-1.18322	0.453425		chpS	b4224	1.05814	0.9763
chrR	b3713	0.609597	0.793993		chrR	b3713	0.927799	0.329521		chrR	b3713	1.43667	0.0976077			chrR	b3713	0.220309	0.892533		chrR	b3713	0.185403	0.964932		chrR	b3713	1.63619	0.0551319			chrR	b3713	0.602639	0.769217		chrR	b3713	-0.880065	0.333535		chrR	b3713	0.582885	0.984035
cirA	b2155	0.317641	0.946195		cirA	b2155	-0.980758	0.342493		cirA	b2155	0.0223522	0.996787			cirA	b2155	-1.04295	0.335914		cirA	b2155	0.472458	0.904903		cirA	b2155	0.253664	0.866993			cirA	b2155	-0.779841	0.689208		cirA	b2155	-0.629978	0.605933		cirA	b2155	-0.650242	0.984035
citA	b0619	-0.0978085	0.977239		citA	b0619	1.0622	0.277174		citA	b0619	0.0470566	0.996787			citA	b0619	-0.785557	0.545419		citA	b0619	-0.671821	0.760983		citA	b0619	-0.308386	0.840507			citA	b0619	-0.763564	0.709641		citA	b0619	-0.517786	0.65143		citA	b0619	-0.31059	0.989491
citB	b0620	-0.52157	0.924187		citB	b0620	-0.278809	0.894188		citB	b0620	-0.633339	0.937266			citB	b0620	0.686012	0.764558		citB	b0620	-0.811203	0.744762		citB	b0620	-0.716214	0.729756			citB	b0620	0.0628519	0.992052		citB	b0620	-0.12455	0.940929		citB	b0620	-0.26951	0.989937
citC	b0618	0.18014	NA		citC	b0618	0.729875	NA		citC	b0618	-0.28104	NA			citC	b0618	0.476383	0.902837		citC	b0618	-1.28916	NA		citC	b0618	-1.18861	NA			citC	b0618	0.333383	0.973152		citC	b0618	-0.564784	NA		citC	b0618	1.08353	0.986829
citD	b0617	-0.88537	NA		citD	b0617	-0.831864	NA		citD	b0617	-0.459922	NA			citD	b0617	-0.403072	NA		citD	b0617	-1.91498	NA		citD	b0617	1.00873	NA			citD	b0617	-0.0673906	0.994993		citD	b0617	-2.18116	NA		citD	b0617	-0.61622	NA
citE	b0616	0.839503	0.874316		citE	b0616	1.4555	0.410676		citE	b0616	-0.59815	0.970424			citE	b0616	0.530842	0.83515		citE	b0616	0.528852	0.935815		citE	b0616	-0.475766	0.879481			citE	b0616	0.506219	0.915197		citE	b0616	0.302296	0.899539		citE	b0616	-0.80051	0.986829
citF	b0615	-0.838933	0.926829		citF	b0615	-1.54544	0.645239		citF	b0615	-0.663335	0.970424			citF	b0615	-0.0364844	0.994812		citF	b0615	-1.70985	0.794701		citF	b0615	-0.133722	0.971241			citF	b0615	-0.0319205	0.996275		citF	b0615	-1.26415	0.688039		citF	b0615	0.163045	0.990197
citG	b0613	-1.56942	NA		citG	b0613	-0.512076	NA		citG	b0613	-2.1482	NA			citG	b0613	-2.03261	NA		citG	b0613	-1.59158	NA		citG	b0613	-2.73845	NA			citG	b0613	-2.0221	0.798474		citG	b0613	-1.43453	NA		citG	b0613	-1.92869	NA
citT	b0612	-0.942771	0.816292		citT	b0612	0.354433	0.911837		citT	b0612	-0.517981	0.970424			citT	b0612	0.153559	0.95498		citT	b0612	-0.842784	0.856246		citT	b0612	-1.08196	0.688997			citT	b0612	0.555561	0.906212		citT	b0612	-0.30608	0.896232		citT	b0612	-0.204456	0.990197
citX	b0614	0.143203	0.978968		citX	b0614	-0.642875	0.826952		citX	b0614	-1.08024	0.897309			citX	b0614	-0.885924	0.665988		citX	b0614	-1.0587	0.821528		citX	b0614	-0.41835	0.887384			citX	b0614	-0.882453	0.801231		citX	b0614	0.22386	0.938912		citX	b0614	-1.19885	0.984035
clcA	b0155	-0.350885	0.848761		clcA	b0155	0.241634	0.829471		clcA	b0155	0.139512	0.972462			clcA	b0155	0.827091	0.206952		clcA	b0155	-0.364285	0.857282		clcA	b0155	0.14515	0.878961			clcA	b0155	-0.0350717	0.990299		clcA	b0155	0.0362063	0.970143		clcA	b0155	0.622354	0.973857
clcB	b1592	-0.401711	0.946716		clcB	b1592	0.17088	0.953065		clcB	b1592	-0.601937	0.937266			clcB	b1592	-0.324109	0.87444		clcB	b1592	-1.00137	0.68562		clcB	b1592	-1.27946	0.40426			clcB	b1592	0.391071	0.930294		clcB	b1592	0.206387	0.918682		clcB	b1592	0.0828369	0.990197
clpA	b0882	0.309732	0.915699		clpA	b0882	0.926729	0.224842		clpA	b0882	0.495133	0.851284			clpA	b0882	0.0423084	0.979633		clpA	b0882	0.8769	0.486624		clpA	b0882	1.00585	0.187243			clpA	b0882	0.158292	0.969807		clpA	b0882	0.0197882	0.984936		clpA	b0882	0.150688	0.989937
clpB	b2592	0.370328	0.899307		clpB	b2592	0.422789	0.717374		clpB	b2592	0.197338	0.972462			clpB	b2592	-0.0974447	0.945937		clpB	b2592	-0.238532	0.949915		clpB	b2592	-0.443307	0.670062			clpB	b2592	0.283692	0.915197		clpB	b2592	0.723812	0.38584		clpB	b2592	0.606565	0.983105
clpP	b0437	0.482776	0.645643		clpP	b0437	-0.145413	0.891641		clpP	b0437	0.248792	0.933708			clpP	b0437	-0.185698	0.836233		clpP	b0437	-0.140379	0.957531		clpP	b0437	0.519669	0.395548			clpP	b0437	0.0708734	0.973152		clpP	b0437	0.0224567	0.976768		clpP	b0437	0.0944583	0.989937
clpS	b0881	0.105139	0.974294		clpS	b0881	0.7104	0.59032		clpS	b0881	0.556254	0.902741			clpS	b0881	-0.225443	0.895774		clpS	b0881	-0.146248	0.973423		clpS	b0881	1.35686	0.183366			clpS	b0881	-0.291408	0.943329		clpS	b0881	-0.649464	0.605933		clpS	b0881	-0.192398	0.989937
clpX	b0438	0.084058	0.97305		clpX	b0438	-0.482266	0.456728		clpX	b0438	-0.249155	0.938095			clpX	b0438	0.230732	0.808747		clpX	b0438	0.0932316	0.971858		clpX	b0438	0.0779382	0.923238			clpX	b0438	0.167443	0.94186		clpX	b0438	0.722633	0.164803		clpX	b0438	0.560098	0.961473
clsA	b1249	0.534087	0.631987		clsA	b1249	-0.530415	0.416302		clsA	b1249	-0.0227473	0.996787			clsA	b1249	0.595738	0.351696		clsA	b1249	-0.59045	0.561002		clsA	b1249	0.694084	0.301645			clsA	b1249	0.618085	0.401406		clsA	b1249	-1.69448	1.16125e-05		clsA	b1249	-0.0322196	0.990197
clsB	b0789	0.180558	0.957396		clsB	b0789	-0.424738	0.690925		clsB	b0789	-0.620445	0.791249			clsB	b0789	0.328295	0.764865		clsB	b0789	0.265768	0.937985		clsB	b0789	-0.3485	0.780884			clsB	b0789	-0.198752	0.943329		clsB	b0789	-0.711208	0.338821		clsB	b0789	-0.244874	0.989491
clsC	b1046	0.111576	0.969047		clsC	b1046	-0.729005	0.318463		clsC	b1046	0.287427	0.957842			clsC	b1046	0.776907	0.259899		clsC	b1046	-0.565007	0.719003		clsC	b1046	-0.0709111	0.952503			clsC	b1046	0.706578	0.39741		clsC	b1046	-0.873818	0.165435		clsC	b1046	0.424431	0.986829
cmk	b0910	0.748383	0.459639		cmk	b0910	0.802696	0.172404		cmk	b0910	0.53036	0.711635			cmk	b0910	0.274829	0.788292		cmk	b0910	-0.350587	0.867153		cmk	b0910	-0.408534	0.598494			cmk	b0910	0.334948	0.838193		cmk	b0910	0.500745	0.467736		cmk	b0910	-0.192794	0.989491
cmoA	b1870	-0.491526	0.871318		cmoA	b1870	0.747136	0.518284		cmoA	b1870	0.664036	0.851284			cmoA	b1870	-0.312836	0.842037		cmoA	b1870	0.151404	0.971858		cmoA	b1870	-0.148598	0.920977			cmoA	b1870	-0.369213	0.903754		cmoA	b1870	0.794886	0.428252		cmoA	b1870	0.360029	0.986829
cmoB	b1871	-1.40109	0.222566		cmoB	b1871	0.567882	0.673618		cmoB	b1871	-0.595146	0.902741			cmoB	b1871	-0.69822	0.58311		cmoB	b1871	-0.176772	0.965947		cmoB	b1871	-1.10724	0.356544			cmoB	b1871	-1.06665	0.403852		cmoB	b1871	0.575191	0.632726		cmoB	b1871	-0.152213	0.990197
cmtA	b2933	-2.64487	NA		cmtA	b2933	-2.47593	NA		cmtA	b2933	-1.65497	NA			cmtA	b2933	-1.92144	NA		cmtA	b2933	-2.14387	NA		cmtA	b2933	-3.61551	NA			cmtA	b2933	-1.95052	0.778323		cmtA	b2933	-1.44315	NA		cmtA	b2933	-1.35461	NA
cmtB	b2934	0.205955	NA		cmtB	b2934	-0.0797587	NA		cmtB	b2934	0.908468	NA			cmtB	b2934	2.35827	NA		cmtB	b2934	3.20777	NA		cmtB	b2934	0.995682	NA			cmtB	b2934	0.986834	NA		cmtB	b2934	1.59872	NA		cmtB	b2934	2.51311	NA
cnu	b1625	-0.961305	0.765521		cnu	b1625	-0.24264	0.918898		cnu	b1625	-0.713328	0.897309			cnu	b1625	0.0538809	0.983324		cnu	b1625	-0.360853	0.941174		cnu	b1625	-0.723887	0.681341			cnu	b1625	0.293791	0.962025		cnu	b1625	-0.145645	0.938999		cnu	b1625	0.151798	0.990197
coaA	b3974	-0.325969	0.939493		coaA	b3974	0.354909	0.833435		coaA	b3974	-0.463544	0.947311			coaA	b3974	0.218849	0.895345		coaA	b3974	-0.141672	0.971858		coaA	b3974	-0.394294	0.818158			coaA	b3974	-0.0673187	0.987924		coaA	b3974	-0.23428	0.873952		coaA	b3974	-0.856617	0.983105
coaD	b3634	-0.302457	0.936378		coaD	b3634	0.833047	0.232701		coaD	b3634	0.206725	0.970424			coaD	b3634	-0.0428684	0.979633		coaD	b3634	-0.0814847	0.977318		coaD	b3634	-0.526982	0.591536			coaD	b3634	-0.707165	0.559167		coaD	b3634	0.96036	0.0917273		coaD	b3634	0.858788	0.897248
coaE	b0103	-0.0124525	0.997717		coaE	b0103	0.845238	0.22925		coaE	b0103	-0.394305	0.926272			coaE	b0103	-0.209202	0.87165		coaE	b0103	-0.136718	0.964932		coaE	b0103	-0.199095	0.878366			coaE	b0103	-0.528899	0.722141		coaE	b0103	-0.103581	0.928123		coaE	b0103	-0.318316	0.986829
cobB	b1120	-0.247282	0.915699		cobB	b1120	-0.386669	0.679083		cobB	b1120	-0.24947	0.961197			cobB	b1120	-0.372599	0.649906		cobB	b1120	-0.147105	0.964701		cobB	b1120	-0.0881263	0.937743			cobB	b1120	-0.267298	0.881812		cobB	b1120	-0.554343	0.420918		cobB	b1120	-0.058267	0.990197
cobC	b0638	-1.08209	0.54862		cobC	b0638	-0.0856385	0.972494		cobC	b0638	-0.563697	0.958124			cobC	b0638	-1.12317	0.322766		cobC	b0638	0.363671	0.937985		cobC	b0638	-1.60771	0.332646			cobC	b0638	-0.644894	0.778548		cobC	b0638	0.24314	0.885637		cobC	b0638	-0.636018	0.986829
cobS	b1992	0.181922	0.974294		cobS	b1992	0.219246	0.958209		cobS	b1992	-0.339597	0.972848			cobS	b1992	0.606049	0.80169		cobS	b1992	-0.775588	0.900858		cobS	b1992	-0.0902729	0.974071			cobS	b1992	0.250563	0.973152		cobS	b1992	-1.36293	0.387288		cobS	b1992	-0.536127	0.989491
cobT	b1991	-0.488555	0.861357		cobT	b1991	1.05368	0.277174		cobT	b1991	-1.29359	0.719305			cobT	b1991	-0.328731	0.820821		cobT	b1991	0.582119	0.829617		cobT	b1991	-1.34871	0.484761			cobT	b1991	-0.418453	0.861689		cobT	b1991	-0.254061	0.845318		cobT	b1991	-1.75705	0.848804
cobU	b1993	-0.252008	0.961729		cobU	b1993	0.545773	0.777227		cobU	b1993	-0.00183009	0.99923			cobU	b1993	-0.060298	0.979633		cobU	b1993	0.294752	0.96163		cobU	b1993	-0.264806	0.911887			cobU	b1993	-0.182045	0.973152		cobU	b1993	0.0613119	0.971506		cobU	b1993	0.00252306	0.999015
codA	b0337	1.4261	0.333107		codA	b0337	-1.02212	0.383846		codA	b0337	1.04751	0.622895			codA	b0337	-0.292848	0.871297		codA	b0337	0.491073	0.910903		codA	b0337	0.77564	0.577236			codA	b0337	1.65984	0.116638		codA	b0337	-0.180158	0.926097		codA	b0337	-0.0256826	0.99361
codB	b0336	2.49442	0.0807304		codB	b0336	-1.78966	0.197367		codB	b0336	1.19276	0.771918			codB	b0336	0.698588	0.739901		codB	b0336	0.363479	0.96163		codB	b0336	0.825396	0.707329			codB	b0336	2.93442	0.00673818		codB	b0336	-1.04287	0.529162		codB	b0336	-1.34638	0.9763
cof	b0446	0.396944	0.858828		cof	b0446	-0.259893	0.85156		cof	b0446	0.247861	0.970424			cof	b0446	1.01911	0.14807		cof	b0446	-0.445034	0.851154		cof	b0446	0.312385	0.816582			cof	b0446	0.827091	0.333601		cof	b0446	0.552532	0.516073		cof	b0446	0.358893	0.986829
cohE	b1145	0.416523	0.936378		cohE	b1145	0.723938	0.649045		cohE	b1145	-0.428638	0.966987			cohE	b1145	1.10691	0.42985		cohE	b1145	-0.0182936	0.994815		cohE	b1145	1.04877	0.559405			cohE	b1145	0.100484	0.983058		cohE	b1145	0.469404	0.768331		cohE	b1145	-0.498949	0.986829
copA	b0484	0.236456	0.945935		copA	b0484	0.498116	0.589517		copA	b0484	0.59384	0.719305			copA	b0484	-0.820493	0.298193		copA	b0484	0.0840622	0.978051		copA	b0484	0.165529	0.871627			copA	b0484	0.0717231	0.981489		copA	b0484	-0.532071	0.516073		copA	b0484	0.316852	0.986829
corA	b3816	-0.154083	0.96293		corA	b3816	0.946858	0.200538		corA	b3816	-0.0116435	0.996787			corA	b3816	-0.284573	0.826381		corA	b3816	-0.213825	0.953016		corA	b3816	-1.19303	0.0991628			corA	b3816	-0.423951	0.830194		corA	b3816	0.810134	0.2688		corA	b3816	-0.0237018	0.991522
cpdA	b3032	-0.0624742	0.974294		cpdA	b3032	0.127617	0.896327		cpdA	b3032	-0.295517	0.903221			cpdA	b3032	-0.375737	0.558316		cpdA	b3032	0.464582	0.64404		cpdA	b3032	-0.319962	0.670062			cpdA	b3032	-0.209725	0.890851		cpdA	b3032	0.280987	0.663731		cpdA	b3032	-0.333408	0.984035
cpdB	b4213	-0.242467	0.946716		cpdB	b4213	0.193038	0.893192		cpdB	b4213	-0.978808	0.573438			cpdB	b4213	-0.0990464	0.939846		cpdB	b4213	0.512203	0.793325		cpdB	b4213	-0.494598	0.729756			cpdB	b4213	-0.632294	0.56692		cpdB	b4213	0.215352	0.841816		cpdB	b4213	-1.3285	0.614574
cpsB	b2049	-0.407542	0.957396		cpsB	b2049	-0.182386	0.965799		cpsB	b2049	-0.989959	0.919461			cpsB	b2049	0.751916	0.765847		cpsB	b2049	-1.69154	0.485835		cpsB	b2049	-0.912942	0.766523			cpsB	b2049	-0.589433	0.901788		cpsB	b2049	-0.656916	0.755375		cpsB	b2049	-1.08304	0.986829
cpsG	b2048	-0.484144	0.918471		cpsG	b2048	-2.19003	0.122797		cpsG	b2048	-1.59534	0.813479			cpsG	b2048	1.0216	0.557076		cpsG	b2048	-2.36191	0.152902		cpsG	b2048	-2.48709	0.298449			cpsG	b2048	0.587616	0.862744		cpsG	b2048	-1.41995	0.378194		cpsG	b2048	-0.325686	0.990197
cptA	b2896	-0.2132	0.96293		cptA	b2896	-0.748467	0.520495		cptA	b2896	-0.276786	0.972462			cptA	b2896	0.0846382	0.963756		cptA	b2896	-0.496834	0.895363		cptA	b2896	0.185113	0.916849			cptA	b2896	0.445939	0.870654		cptA	b2896	-0.32384	0.82128		cptA	b2896	-0.362709	0.986829
cpxA	b3911	-0.129944	0.957396		cpxA	b3911	-0.226542	0.806225		cpxA	b3911	-0.0142066	0.996787			cpxA	b3911	-0.460404	0.48978		cpxA	b3911	0.301569	0.869908		cpxA	b3911	0.0797626	0.92319			cpxA	b3911	-0.0649674	0.974961		cpxA	b3911	0.0679145	0.938999		cpxA	b3911	0.250025	0.986829
cpxP	b4484	0.5389	0.868087		cpxP	b4484	-0.165645	0.944352		cpxP	b4484	0.267685	0.970424			cpxP	b4484	0.178872	0.918305		cpxP	b4484	-1.56329	0.118981		cpxP	b4484	-0.773366	0.506362			cpxP	b4484	1.2366	0.318498		cpxP	b4484	0.0287045	0.98359		cpxP	b4484	0.468386	0.986829
cpxR	b3912	0.592703	0.589443		cpxR	b3912	0.617412	0.314051		cpxR	b3912	0.359094	0.894723			cpxR	b3912	0.815023	0.175315		cpxR	b3912	0.511588	0.691829		cpxR	b3912	-0.0545294	0.955772			cpxR	b3912	0.487558	0.670969		cpxR	b3912	0.246863	0.768331		cpxR	b3912	0.0352727	0.990197
cra	b0080	-0.670023	0.568221		cra	b0080	-0.0858993	0.959338		cra	b0080	-0.183045	0.970424			cra	b0080	-0.271016	0.806602		cra	b0080	-0.149192	0.964701		cra	b0080	0.241343	0.818158			cra	b0080	-0.453523	0.751657		cra	b0080	-0.22044	0.823729		cra	b0080	-0.127043	0.989937
creA	b4397	-0.528082	0.870971		creA	b4397	0.885908	0.360703		creA	b4397	-0.290582	0.970424			creA	b4397	0.350284	0.838099		creA	b4397	-0.270425	0.940372		creA	b4397	-0.287304	0.861281			creA	b4397	-0.834165	0.563466		creA	b4397	0.0587206	0.963309		creA	b4397	-0.325032	0.989491
creB	b4398	-0.290713	0.95818		creB	b4398	0.612803	0.752367		creB	b4398	1.58287	0.412234			creB	b4398	-1.2163	0.369025		creB	b4398	-0.435499	0.931415		creB	b4398	0.381868	0.852284			creB	b4398	-1.52219	0.238851		creB	b4398	-0.13067	0.94609		creB	b4398	0.518535	0.986829
creC	b4399	-0.278804	0.946716		creC	b4399	0.237881	0.892952		creC	b4399	0.380838	0.957842			creC	b4399	-0.218074	0.876568		creC	b4399	-0.498651	0.851595		creC	b4399	-0.203438	0.897649			creC	b4399	-0.135317	0.973152		creC	b4399	-0.208839	0.8788		creC	b4399	0.300838	0.989491
creD	b4400	-0.710102	0.805058		creD	b4400	0.361893	0.86417		creD	b4400	0.0150629	0.996787			creD	b4400	1.32518	0.356783		creD	b4400	-0.484997	0.905198		creD	b4400	-0.270787	0.87014			creD	b4400	-0.0602404	0.990299		creD	b4400	-0.373386	0.806605		creD	b4400	0.393402	0.986829
crfC	b4109	-0.751117	0.785004		crfC	b4109	-0.175809	0.951476		crfC	b4109	0.787603	0.851284			crfC	b4109	-0.120246	0.950676		crfC	b4109	0.0446618	0.985954		crfC	b4109	0.466115	0.807395			crfC	b4109	-0.635021	0.794927		crfC	b4109	-0.12498	0.945069		crfC	b4109	0.706247	0.984035
crl	b0240	0.36152	0.927605		crl	b0240	-0.147845	0.952638		crl	b0240	0.855754	0.700171			crl	b0240	-1.58633	0.0650985		crl	b0240	0.542549	0.873323		crl	b0240	0.770503	0.531316			crl	b0240	-0.829117	0.665007		crl	b0240	-0.101335	0.953048		crl	b0240	-0.790152	0.983105
croE	b1146	0.151258	NA		croE	b1146	-0.837144	NA		croE	b1146	0.114084	NA			croE	b1146	1.67249	0.410705		croE	b1146	-0.2235	0.977318		croE	b1146	0.380829	NA			croE	b1146	0.364824	0.948197		croE	b1146	-0.914675	NA		croE	b1146	1.20263	0.984035
crp	b3357	0.232483	0.952141		crp	b3357	-0.367755	0.757223		crp	b3357	-0.149969	0.972653			crp	b3357	0.0501409	0.976604		crp	b3357	0.719916	0.64246		crp	b3357	0.787059	0.37117			crp	b3357	0.252638	0.929414		crp	b3357	-0.40897	0.682926		crp	b3357	-0.189491	0.989937
crr	b2417	0.174378	0.957396		crr	b2417	0.0651785	0.966364		crr	b2417	-0.120118	0.977085			crr	b2417	0.273968	0.809705		crr	b2417	-0.0631703	0.978051		crr	b2417	0.57053	0.473228			crr	b2417	0.136747	0.970791		crr	b2417	0.793162	0.219318		crr	b2417	0.441847	0.984035
csdA	b2810	0.359357	0.859803		csdA	b2810	-0.198493	0.872637		csdA	b2810	-0.463235	0.857287			csdA	b2810	-0.090729	0.939119		csdA	b2810	0.489732	0.75893		csdA	b2810	-0.714049	0.404199			csdA	b2810	0.414859	0.775731		csdA	b2810	0.371853	0.654592		csdA	b2810	-0.409752	0.986829
csdE	b2811	-0.301619	0.933825		csdE	b2811	0.101279	0.965898		csdE	b2811	-0.747432	0.819756			csdE	b2811	-0.263632	0.847556		csdE	b2811	-0.089699	0.978051		csdE	b2811	-0.813039	0.543601			csdE	b2811	-0.134126	0.973152		csdE	b2811	0.499904	0.658564		csdE	b2811	-0.00494308	0.997867
csgA	b1042	-1.61252	0.60351		csgA	b1042	1.28455	0.502054		csgA	b1042	0.356512	0.972653			csgA	b1042	1.13136	0.700597		csgA	b1042	-1.24041	0.654515		csgA	b1042	1.40489	0.634861			csgA	b1042	-0.572868	0.915197		csgA	b1042	0.457647	0.830588		csgA	b1042	0.767709	0.986829
csgB	b1041	-0.702667	NA		csgB	b1041	4.41398	NA		csgB	b1041	2.23458	NA			csgB	b1041	1.68488	0.743167		csgB	b1041	-2.01396	NA		csgB	b1041	2.11431	NA			csgB	b1041	0.643588	0.956428		csgB	b1041	0.143711	NA		csgB	b1041	1.80858	0.983105
csgC	b1043	0.824083	NA		csgC	b1043	-2.20643	NA		csgC	b1043	1.76958	NA			csgC	b1043	0.784202	NA		csgC	b1043	-2.92647	NA		csgC	b1043	2.41977	NA			csgC	b1043	0.192593	NA		csgC	b1043	-1.30677	NA		csgC	b1043	0.493341	NA
csgD	b1040	0.29896	0.939569		csgD	b1040	0.263427	0.884883		csgD	b1040	0.0891897	0.990431			csgD	b1040	2.10529	0.00208195		csgD	b1040	-0.240118	0.957531		csgD	b1040	3.04646	0.0834783			csgD	b1040	2.44101	2.03367e-05		csgD	b1040	-0.159045	0.920184		csgD	b1040	-0.229341	0.989937
csgE	b1039	0.267785	NA		csgE	b1039	-1.96997	NA		csgE	b1039	-0.0866064	NA			csgE	b1039	1.78278	0.229834		csgE	b1039	-1.57735	0.730835		csgE	b1039	2.60633	NA			csgE	b1039	1.64688	0.27779		csgE	b1039	-1.87469	NA		csgE	b1039	0.843575	0.986829
csgF	b1038	-0.996076	NA		csgF	b1038	-0.785098	NA		csgF	b1038	1.72422	NA			csgF	b1038	1.06678	0.706853		csgF	b1038	-0.611619	NA		csgF	b1038	3.9579	NA			csgF	b1038	2.65873	0.27779		csgF	b1038	-0.532736	NA		csgF	b1038	0.939341	0.986829
csgG	b1037	-0.17733	0.972565		csgG	b1037	0.178381	0.952638		csgG	b1037	-0.395843	0.970424			csgG	b1037	0.840985	0.580134		csgG	b1037	-0.516098	0.91019		csgG	b1037	-0.0222092	0.992056			csgG	b1037	1.40162	0.314928		csgG	b1037	0.300816	0.873952		csgG	b1037	-0.200426	0.990197
csiD	b2659	2.16436	0.265958		csiD	b2659	2.67668	0.0337645		csiD	b2659	2.98338	0.0165995			csiD	b2659	3.18096	0.00758248		csiD	b2659	1.55512	0.565801		csiD	b2659	2.08337	0.174297			csiD	b2659	1.48433	0.560915		csiD	b2659	-1.03776	0.580642		csiD	b2659	0.780511	0.986829
csiE	b2535	-0.192355	0.96293		csiE	b2535	-0.720242	0.551515		csiE	b2535	-0.468742	0.921494			csiE	b2535	0.764141	0.553644		csiE	b2535	0.190405	0.965947		csiE	b2535	-0.545405	0.673597			csiE	b2535	0.184178	0.973152		csiE	b2535	0.37674	0.794172		csiE	b2535	-0.932853	0.973857
csiR	b2664	1.27618	0.205559		csiR	b2664	-0.592872	0.589517		csiR	b2664	-0.16133	0.972996			csiR	b2664	1.61043	0.0192324		csiR	b2664	-0.112334	0.97596		csiR	b2664	0.501275	0.651531			csiR	b2664	0.747274	0.638542		csiR	b2664	-0.790843	0.369944		csiR	b2664	0.254671	0.989491
cspA	b3556	0.623591	0.87469		cspA	b3556	-0.331161	0.884883		cspA	b3556	-0.0231293	0.996787			cspA	b3556	0.086199	0.971905		cspA	b3556	-0.672069	0.867153		cspA	b3556	-0.263123	0.878673			cspA	b3556	0.266819	0.964279		cspA	b3556	1.15237	0.331726		cspA	b3556	0.0848326	0.990197
cspB	b1557	0.161936	0.974294		cspB	b1557	-0.256619	0.926497		cspB	b1557	-1.06911	0.719305			cspB	b1557	0.796931	0.678564		cspB	b1557	-0.800103	0.830025		cspB	b1557	0.455278	0.813193			cspB	b1557	1.92361	0.198522		cspB	b1557	1.57296	0.176408		cspB	b1557	-0.138061	0.990197
cspC	b1823	-0.305243	0.9509		cspC	b1823	-0.580918	0.67093		cspC	b1823	0.259167	0.970424			cspC	b1823	-0.961094	0.411524		cspC	b1823	-0.119046	0.977402		cspC	b1823	1.23153	0.209151			cspC	b1823	-0.365783	0.91225		cspC	b1823	1.06973	0.262096		cspC	b1823	1.11218	0.836689
cspD	b0880	-0.0570348	0.985596		cspD	b0880	0.353657	0.886553		cspD	b0880	-0.099827	0.990431			cspD	b0880	1.08086	0.509895		cspD	b0880	-0.487001	0.928231		cspD	b0880	0.22943	0.902832			cspD	b0880	0.36595	0.943329		cspD	b0880	0.614207	0.71785		cspD	b0880	-0.810951	0.984035
cspE	b0623	0.696906	0.747386		cspE	b0623	0.434791	0.760147		cspE	b0623	0.888674	0.596755			cspE	b0623	-0.161345	0.919312		cspE	b0623	-0.744321	0.710141		cspE	b0623	0.703367	0.523792			cspE	b0623	0.148207	0.973152		cspE	b0623	0.983153	0.274867		cspE	b0623	0.0107315	0.997491
cspF	b1558	-1.44198	0.700734		cspF	b1558	1.44127	0.225477		cspF	b1558	-1.6811	0.596755			cspF	b1558	-0.0534692	0.987628		cspF	b1558	-0.084398	0.979154		cspF	b1558	-2.146	0.22388			cspF	b1558	-0.782749	0.86686		cspF	b1558	1.25196	0.256631		cspF	b1558	-2.10743	0.807524
cspG	b0990	0.669046	0.861357		cspG	b0990	-0.0934187	0.970433		cspG	b0990	-0.250547	0.972462			cspG	b0990	-0.400123	0.83287		cspG	b0990	-0.412395	0.926164		cspG	b0990	0.285241	0.867224			cspG	b0990	0.958445	0.665007		cspG	b0990	1.15945	0.258912		cspG	b0990	0.0851436	0.990197
cspH	b0989	0.543338	NA		cspH	b0989	-0.499943	NA		cspH	b0989	0.980362	NA			cspH	b0989	2.74857	NA		cspH	b0989	-0.493288	NA		cspH	b0989	3.36378	NA			cspH	b0989	3.94034	NA		cspH	b0989	1.38845	NA		cspH	b0989	1.46003	NA
cspI	b1552	0.696658	0.9178		cspI	b1552	0.632852	0.817793		cspI	b1552	0.0440086	0.996787			cspI	b1552	-0.270023	0.929568		cspI	b1552	-1.17296	0.751553		cspI	b1552	-0.346802	0.879481			cspI	b1552	1.39566	0.679087		cspI	b1552	1.73847	0.255767		cspI	b1552	0.255819	0.989937
csrA	b2696	0.989003	0.710137		csrA	b2696	0.069052	0.983436		csrA	b2696	0.561602	0.933708			csrA	b2696	1.59185	0.203733		csrA	b2696	-0.34258	0.954099		csrA	b2696	0.321816	0.854294			csrA	b2696	0.670013	0.830194		csrA	b2696	0.0215051	0.987229		csrA	b2696	0.18915	0.989937
csrB	b4408	1.37213	0.407765		csrB	b4408	0.737768	0.602161		csrB	b4408	0.249615	0.972462			csrB	b4408	-0.385149	0.83515		csrB	b4408	-1.48573	0.248524		csrB	b4408	-0.494804	0.740951			csrB	b4408	1.03761	0.567508		csrB	b4408	0.571834	0.689431		csrB	b4408	-0.369717	0.986829
csrC	b4457	1.17195	0.772443		csrC	b4457	-1.15455	0.573014		csrC	b4457	-1.55038	0.596755			csrC	b4457	0.124859	0.969706		csrC	b4457	-3.39503	0.00810955		csrC	b4457	-0.250183	0.917065			csrC	b4457	2.19011	0.238363		csrC	b4457	-1.4002	0.412191		csrC	b4457	-0.326501	0.989937
csrD	b3252	-0.0851893	0.972565		csrD	b3252	-0.0644958	0.965799		csrD	b3252	-0.202816	0.958124			csrD	b3252	0.212559	0.813211		csrD	b3252	0.123852	0.964701		csrD	b3252	-0.0776409	0.926311			csrD	b3252	0.40644	0.722141		csrD	b3252	-0.0389851	0.964513		csrD	b3252	-0.289979	0.986829
cstA	b0598	-1.46266	0.438526		cstA	b0598	0.692936	0.687812		cstA	b0598	0.243157	0.972653			cstA	b0598	-0.747428	0.651821		cstA	b0598	0.524479	0.916205		cstA	b0598	-0.272415	0.874801			cstA	b0598	-1.81541	0.134806		cstA	b0598	0.517527	0.766239		cstA	b0598	-1.20893	0.959079
cueO	b0123	-0.784821	0.500778		cueO	b0123	0.880667	0.201116		cueO	b0123	-0.272835	0.957842			cueO	b0123	-0.316253	0.779496		cueO	b0123	0.309303	0.916205		cueO	b0123	-0.913097	0.21178			cueO	b0123	-0.978573	0.205736		cueO	b0123	-0.111049	0.930907		cueO	b0123	-0.330671	0.986829
cueR	b0487	-0.292028	0.94124		cueR	b0487	-0.167233	0.935398		cueR	b0487	-0.180802	0.972462			cueR	b0487	-0.258356	0.855646		cueR	b0487	-0.15372	0.968911		cueR	b0487	-0.0636563	0.962343			cueR	b0487	0.0866786	0.981489		cueR	b0487	-0.105287	0.940029		cueR	b0487	0.358031	0.986829
curA	b1449	1.01049	0.477688		curA	b1449	0.0487748	0.983436		curA	b1449	0.464043	0.903221			curA	b1449	0.669674	0.564244		curA	b1449	0.0486973	0.985162		curA	b1449	0.529898	0.638236			curA	b1449	0.143045	0.973152		curA	b1449	-0.48468	0.673292		curA	b1449	0.437643	0.986829
cusA	b0575	-0.721151	0.711173		cusA	b0575	0.136447	0.954152		cusA	b0575	-0.398214	0.958124			cusA	b0575	-0.0635402	0.971905		cusA	b0575	-0.436584	0.903624		cusA	b0575	-0.685613	0.648579			cusA	b0575	-0.40248	0.862729		cusA	b0575	-0.463115	0.680698		cusA	b0575	0.196426	0.989937
cusB	b0574	-0.980575	NA		cusB	b0574	-0.266089	NA		cusB	b0574	0.667675	NA			cusB	b0574	0.161523	0.976668		cusB	b0574	0.229228	NA		cusB	b0574	-0.451682	NA			cusB	b0574	-0.175135	0.988008		cusB	b0574	0.327022	NA		cusB	b0574	2.29812	0.983105
cusC	b0572	-0.987507	NA		cusC	b0572	-2.89736	NA		cusC	b0572	0.511902	NA			cusC	b0572	-0.74874	0.851221		cusC	b0572	-0.0508868	NA		cusC	b0572	-0.366816	NA			cusC	b0572	-0.935221	0.897203		cusC	b0572	-0.0405951	NA		cusC	b0572	2.4356	0.983105
cusF	b0573	-2.47381	NA		cusF	b0573	0.77003	NA		cusF	b0573	4.76448	NA			cusF	b0573	0.364458	NA		cusF	b0573	-1.97858	NA		cusF	b0573	2.38982	NA			cusF	b0573	-1.69166	NA		cusF	b0573	-1.51667	NA		cusF	b0573	1.63835	NA
cusR	b0571	-0.699105	0.727458		cusR	b0571	0.599015	0.591506		cusR	b0571	0.123656	0.98124			cusR	b0571	-0.717709	0.522135		cusR	b0571	0.369232	0.916205		cusR	b0571	0.24042	0.866993			cusR	b0571	-0.458053	0.840144		cusR	b0571	0.750181	0.395816		cusR	b0571	-0.161909	0.989937
cusS	b0570	0.0893258	0.976064		cusS	b0570	1.05719	0.237589		cusS	b0570	-0.20464	0.972653			cusS	b0570	-1.03297	0.257129		cusS	b0570	-0.257826	0.947562		cusS	b0570	-0.66095	0.637345			cusS	b0570	-0.366713	0.890851		cusS	b0570	0.161464	0.909631		cusS	b0570	-0.225598	0.989937
cutA	b4137	0.301514	0.952141		cutA	b4137	-0.329755	0.828967		cutA	b4137	0.254624	0.970424			cutA	b4137	0.389035	0.80169		cutA	b4137	0.259841	0.949907		cutA	b4137	1.10401	0.296575			cutA	b4137	1.07173	0.361914		cutA	b4137	-0.682043	0.451126		cutA	b4137	0.198595	0.989937
cutC	b1874	0.38851	0.925075		cutC	b1874	0.322346	0.864787		cutC	b1874	0.0812891	0.990431			cutC	b1874	0.172018	0.92606		cutC	b1874	-0.100063	0.978051		cutC	b1874	0.0926286	0.950888			cutC	b1874	0.770967	0.722141		cutC	b1874	1.03104	0.304021		cutC	b1874	-0.0785627	0.990197
cvpA	b2313	-0.526743	0.793993		cvpA	b2313	-0.472209	0.661392		cvpA	b2313	-0.239517	0.970424			cvpA	b2313	-0.915916	0.271058		cvpA	b2313	0.183477	0.963705		cvpA	b2313	-0.0419918	0.971241			cvpA	b2313	-0.27958	0.914188		cvpA	b2313	0.552439	0.541222		cvpA	b2313	0.154512	0.989937
cvrA	b1191	0.293939	0.9178		cvrA	b1191	-1.03981	0.155937		cvrA	b1191	-0.586421	0.886807			cvrA	b1191	-0.0483424	0.976106		cvrA	b1191	-0.627951	0.719884		cvrA	b1191	-0.691185	0.591536			cvrA	b1191	0.144361	0.969807		cvrA	b1191	-0.535189	0.558987		cvrA	b1191	-0.989695	0.961473
cyaA	b3806	0.587322	0.513108		cyaA	b3806	-0.519783	0.377843		cyaA	b3806	0.0222957	0.996787			cyaA	b3806	0.0128771	0.991469		cyaA	b3806	0.147726	0.957531		cyaA	b3806	0.100534	0.905695			cyaA	b3806	0.470356	0.653069		cyaA	b3806	-0.0380367	0.964537		cyaA	b3806	0.303609	0.986829
cyaR	b4438	-1.36751	NA		cyaR	b4438	1.30828	NA		cyaR	b4438	5.74448	NA			cyaR	b4438	0.210584	NA		cyaR	b4438	-0.706788	NA		cyaR	b4438	-0.916784	NA			cyaR	b4438	2.87527	NA		cyaR	b4438	2.65691	NA		cyaR	b4438	1.44405	NA
cyaY	b3807	-0.434034	0.894032		cyaY	b3807	-0.277013	0.875295		cyaY	b3807	0.00784154	0.998267			cyaY	b3807	-0.785918	0.469443		cyaY	b3807	-0.157086	0.97084		cyaY	b3807	0.302317	0.843897			cyaY	b3807	-0.884956	0.495521		cyaY	b3807	-0.0498356	0.971506		cyaY	b3807	-0.234284	0.989937
cybB	b1418	0.532979	0.913068		cybB	b1418	1.37942	0.232701		cybB	b1418	-0.722153	0.957842			cybB	b1418	-0.773358	0.584919		cybB	b1418	0.407021	0.928231		cybB	b1418	-0.890908	0.746227			cybB	b1418	-0.418971	0.901788		cybB	b1418	-0.776502	0.493183		cybB	b1418	-1.7377	0.973929
cybC	b4236	0.0838431	0.974294		cybC	b4236	0.0706566	0.972287		cybC	b4236	-1.60211	0.245651			cybC	b4236	-0.436068	0.692875		cybC	b4236	0.0726778	0.978051		cybC	b4236	-1.27877	0.343286			cybC	b4236	-0.392595	0.846447		cybC	b4236	0.163371	0.907107		cybC	b4236	-1.44389	0.82278
cycA	b4208	-0.0679473	0.974994		cycA	b4208	0.890238	0.165568		cycA	b4208	0.393136	0.897309			cycA	b4208	0.613223	0.458581		cycA	b4208	0.333245	0.903624		cycA	b4208	-0.0990607	0.921328			cycA	b4208	-0.490299	0.724385		cycA	b4208	-0.616316	0.379119		cycA	b4208	-0.718545	0.932115
cydA	b0733	-0.833633	0.675248		cydA	b0733	-0.482946	0.747884		cydA	b0733	-0.484842	0.913518			cydA	b0733	-0.717528	0.580134		cydA	b0733	-0.644256	0.821625		cydA	b0733	-0.814736	0.483772			cydA	b0733	-0.0989475	0.981489		cydA	b0733	-0.0710218	0.963846		cydA	b0733	-0.0756987	0.990197
cydB	b0734	-1.16884	0.365499		cydB	b0734	-0.2122	0.907424		cydB	b0734	-0.528979	0.894723			cydB	b0734	-0.939489	0.376938		cydB	b0734	-0.33381	0.931415		cydB	b0734	-0.558637	0.626885			cydB	b0734	-0.228513	0.955009		cydB	b0734	0.129123	0.937011		cydB	b0734	-0.0338133	0.991513
cydC	b0886	-0.866374	0.754111		cydC	b0886	-0.451092	0.828967		cydC	b0886	-0.622509	0.913518			cydC	b0886	-0.99431	0.49069		cydC	b0886	-1.23036	0.531912		cydC	b0886	-1.11642	0.44921			cydC	b0886	-0.365555	0.930294		cydC	b0886	0.02567	0.98593		cydC	b0886	-0.471734	0.986829
cydD	b0887	-0.461023	0.915062		cydD	b0887	0.254591	0.910343		cydD	b0887	-1.76413	0.396271			cydD	b0887	-0.415325	0.822627		cydD	b0887	-0.833496	0.748527		cydD	b0887	-2.68841	0.0325889			cydD	b0887	0.0763966	0.988008		cydD	b0887	0.335577	0.843738		cydD	b0887	-1.6627	0.846841
cydX	b4515	0.0141614	0.997717		cydX	b4515	-0.204168	0.952638		cydX	b4515	0.619829	0.933708			cydX	b4515	0.811914	0.664422		cydX	b4515	-1.27087	0.615017		cydX	b4515	0.182326	0.925661			cydX	b4515	0.1818	0.973152		cydX	b4515	-0.462789	0.819288		cydX	b4515	0.482519	0.986829
cynR	b0338	-2.82143	0.0813987		cynR	b0338	-1.14952	0.5892		cynR	b0338	-0.229903	0.98145			cynR	b0338	-2.53538	0.0972466		cynR	b0338	0.249694	0.972127		cynR	b0338	-0.0109045	0.996876			cynR	b0338	-2.24041	0.227428		cynR	b0338	0.224155	0.938999		cynR	b0338	0.143858	0.990197
cynS	b0340	0.0142394	0.997717		cynS	b0340	1.29614	0.5892		cynS	b0340	-0.488605	0.970424			cynS	b0340	1.26916	0.501855		cynS	b0340	0.150699	0.978051		cynS	b0340	0.134565	0.964237			cynS	b0340	0.695795	0.833934		cynS	b0340	-0.143827	0.953451		cynS	b0340	0.727481	0.986829
cynT	b0339	-0.870069	0.793993		cynT	b0339	0.431484	0.870299		cynT	b0339	0.0198464	0.996787			cynT	b0339	-0.407785	0.847525		cynT	b0339	-0.0569397	0.985954		cynT	b0339	-0.218026	0.929375			cynT	b0339	0.10721	0.984581		cynT	b0339	0.440567	0.822001		cynT	b0339	0.5537	0.986829
cynX	b0341	1.51012	0.608839		cynX	b0341	-0.255661	0.952638		cynX	b0341	-0.710031	0.958124			cynX	b0341	-0.161536	0.945684		cynX	b0341	-1.18603	0.760983		cynX	b0341	-0.078133	0.982142			cynX	b0341	0.379458	0.943329		cynX	b0341	-0.0278797	0.987324		cynX	b0341	-0.92238	0.986829
cyoA	b0432	-0.139018	0.967179		cyoA	b0432	-1.0571	0.123659		cyoA	b0432	-1.082	0.183363			cyoA	b0432	-0.0527857	0.972182		cyoA	b0432	0.872034	0.476187		cyoA	b0432	1.10076	0.141381			cyoA	b0432	0.207022	0.943329		cyoA	b0432	-0.781059	0.293436		cyoA	b0432	-0.532429	0.984035
cyoB	b0431	-0.422377	0.82581		cyoB	b0431	-0.932164	0.146862		cyoB	b0431	-0.652492	0.622895			cyoB	b0431	-0.0419249	0.977597		cyoB	b0431	0.565787	0.708564		cyoB	b0431	0.652413	0.40492			cyoB	b0431	-0.244323	0.915197		cyoB	b0431	-1.21368	0.0289816		cyoB	b0431	-0.288966	0.986829
cyoC	b0430	-0.410589	0.859798		cyoC	b0430	-1.59369	0.00508516		cyoC	b0430	-1.20596	0.131237			cyoC	b0430	-0.154725	0.904919		cyoC	b0430	0.375221	0.903624		cyoC	b0430	0.881329	0.332646			cyoC	b0430	-0.0662581	0.984581		cyoC	b0430	-1.03876	0.134353		cyoC	b0430	-0.404225	0.986829
cyoD	b0429	0.260337	0.933351		cyoD	b0429	-0.753581	0.354683		cyoD	b0429	-0.370317	0.933708			cyoD	b0429	0.112215	0.932445		cyoD	b0429	0.193831	0.96163		cyoD	b0429	1.14563	0.20821			cyoD	b0429	-0.302661	0.893333		cyoD	b0429	-1.52188	0.0101485		cyoD	b0429	-0.85701	0.912616
cyoE	b0428	-0.0379757	0.984662		cyoE	b0428	-0.380786	0.686938		cyoE	b0428	-0.956349	0.188377			cyoE	b0428	0.216121	0.844891		cyoE	b0428	0.432658	0.829617		cyoE	b0428	0.850722	0.224959			cyoE	b0428	-0.29559	0.885142		cyoE	b0428	-1.29728	0.0138262		cyoE	b0428	-0.651213	0.973857
cysA	b2422	-0.261923	0.956467		cysA	b2422	0.0918203	0.965898		cysA	b2422	0.676169	0.813479			cysA	b2422	0.284296	0.85432		cysA	b2422	2.333	0.00123258		cysA	b2422	1.27383	0.187243			cysA	b2422	-0.205198	0.965559		cysA	b2422	0.160863	0.923784		cysA	b2422	-0.183933	0.989937
cysB	b1275	0.782288	0.700734		cysB	b1275	-0.891394	0.324586		cysB	b1275	0.56642	0.855487			cysB	b1275	0.177995	0.905451		cysB	b1275	0.834003	0.643877		cysB	b1275	1.00568	0.333523			cysB	b1275	0.568668	0.775098		cysB	b1275	-0.693552	0.469518		cysB	b1275	-0.561448	0.984035
cysC	b2750	0.527882	0.845801		cysC	b2750	-0.639973	0.592807		cysC	b2750	0.185085	0.972996			cysC	b2750	0.252948	0.869841		cysC	b2750	2.23326	0.00343244		cysC	b2750	1.94962	0.0551319			cysC	b2750	-0.602714	0.769217		cysC	b2750	0.234948	0.8788		cysC	b2750	-0.295687	0.989491
cysD	b2752	0.0783141	0.984662		cysD	b2752	0.544933	0.774286		cysD	b2752	1.52038	0.300307			cysD	b2752	-0.287215	0.892533		cysD	b2752	1.97595	0.0896846		cysD	b2752	1.81967	0.0970215			cysD	b2752	-0.610056	0.851843		cysD	b2752	-0.508769	0.766047		cysD	b2752	-0.113402	0.990197
cysE	b3607	-0.0273893	0.985526		cysE	b3607	-0.398559	0.596689		cysE	b3607	-0.385149	0.860909			cysE	b3607	-0.206213	0.827058		cysE	b3607	0.218776	0.930973		cysE	b3607	0.0136743	0.988805			cysE	b3607	0.0503442	0.983058		cysE	b3607	-0.329569	0.656185		cysE	b3607	-0.211706	0.986829
cysG	b3368	-0.29505	0.832032		cysG	b3368	0.311878	0.662961		cysG	b3368	0.131753	0.972462			cysG	b3368	-0.294571	0.659642		cysG	b3368	-0.0541372	0.978051		cysG	b3368	0.59661	0.360492			cysG	b3368	0.00359131	0.999278		cysG	b3368	0.0524224	0.951205		cysG	b3368	0.428315	0.983105
cysH	b2762	0.196947	0.96293		cysH	b2762	-0.0571589	0.983436		cysH	b2762	0.595142	0.873975			cysH	b2762	0.240505	0.889838		cysH	b2762	3.1186	3.32483e-05		cysH	b2762	1.59935	0.0965154			cysH	b2762	-0.4745	0.862729		cysH	b2762	0.0294909	0.983029		cysH	b2762	-0.256466	0.989937
cysI	b2763	-0.330203	0.939493		cysI	b2763	-0.240782	0.898677		cysI	b2763	0.449525	0.933708			cysI	b2763	-0.129553	0.941555		cysI	b2763	2.2117	0.00350908		cysI	b2763	1.26844	0.198937			cysI	b2763	-0.820059	0.665007		cysI	b2763	-0.0450649	0.975556		cysI	b2763	-0.214666	0.989937
cysJ	b2764	0.04239	0.988856		cysJ	b2764	-0.42677	0.81387		cysJ	b2764	1.09081	0.549844			cysJ	b2764	0.0776308	0.971154		cysJ	b2764	2.07632	0.0200246		cysJ	b2764	1.71998	0.0776169			cysJ	b2764	-0.434469	0.895757		cysJ	b2764	-0.273933	0.873952		cysJ	b2764	-0.254351	0.989937
cysK	b2414	0.338625	0.9178		cysK	b2414	-0.17229	0.929474		cysK	b2414	0.447693	0.903221			cysK	b2414	-0.345275	0.810874		cysK	b2414	1.6525	0.0266518		cysK	b2414	2.04046	0.00283746			cysK	b2414	-0.121702	0.973152		cysK	b2414	-0.645923	0.517367		cysK	b2414	-0.234312	0.989851
cysM	b2421	-0.6427	0.516921		cysM	b2421	0.495104	0.517126		cysM	b2421	0.167039	0.972462			cysM	b2421	-0.513808	0.490116		cysM	b2421	1.22007	0.0262478		cysM	b2421	1.5432	0.0158935			cysM	b2421	-0.915805	0.105991		cysM	b2421	0.460786	0.51144		cysM	b2421	0.102339	0.989937
cysN	b2751	0.19732	0.966089		cysN	b2751	0.490127	0.760318		cysN	b2751	1.4337	0.210824			cysN	b2751	-0.527567	0.731098		cysN	b2751	1.94606	0.0297228		cysN	b2751	1.3606	0.187243			cysN	b2751	-0.917968	0.633735		cysN	b2751	-0.133856	0.938999		cysN	b2751	0.11249	0.990197
cysP	b2425	-0.204055	0.969047		cysP	b2425	0.402746	0.85156		cysP	b2425	1.32266	0.470715			cysP	b2425	0.327914	0.869689		cysP	b2425	1.82826	0.148949		cysP	b2425	1.74148	0.126513			cysP	b2425	-0.28777	0.955995		cysP	b2425	-0.674226	0.654639		cysP	b2425	-0.281498	0.989937
cysQ	b4214	-0.274101	0.946716		cysQ	b4214	0.456038	0.717374		cysQ	b4214	0.657132	0.787253			cysQ	b4214	-0.0416388	0.980787		cysQ	b4214	0.520255	0.851154		cysQ	b4214	0.936343	0.319549			cysQ	b4214	-0.63118	0.72339		cysQ	b4214	0.860416	0.320639		cysQ	b4214	0.975189	0.863416
cysS	b0526	0.0121419	0.997717		cysS	b0526	0.526841	0.544997		cysS	b0526	-0.335798	0.937998			cysS	b0526	-0.256115	0.827058		cysS	b0526	-0.195822	0.953464		cysS	b0526	-0.509624	0.591536			cysS	b0526	-0.00683974	0.998233		cysS	b0526	0.347506	0.702572		cysS	b0526	-0.0784887	0.990197
cysT	b1910	0.0113591	0.997717		cysT	b1910	-0.0265415	0.992832		cysT	b1910	-0.160322	0.981107			cysT	b1910	-0.94778	0.485537		cysT	b1910	-0.0922776	0.978051		cysT	b1910	-0.758239	0.56629			cysT	b1910	0.0659551	0.990299		cysT	b1910	2.21339	0.00957856		cysT	b1910	-0.164717	0.990197
cysU	b2424	-0.23542	0.957396		cysU	b2424	0.307498	0.855412		cysU	b2424	1.25745	0.220264			cysU	b2424	0.302483	0.838099		cysU	b2424	1.25993	0.257943		cysU	b2424	1.97487	0.0191053			cysU	b2424	-0.46396	0.841207		cysU	b2424	-0.507381	0.663731		cysU	b2424	-0.189085	0.989937
cysW	b2423	-0.00894403	0.997717		cysW	b2423	-0.324424	0.806049		cysW	b2423	0.773033	0.596755			cysW	b2423	0.131888	0.919312		cysW	b2423	1.9877	0.00123258		cysW	b2423	1.60243	0.0253162			cysW	b2423	-0.341345	0.879529		cysW	b2423	-0.481872	0.61333		cysW	b2423	0.0523795	0.990197
cysZ	b2413	0.181416	0.974294		cysZ	b2413	0.727607	0.750279		cysZ	b2413	-0.0424667	0.996787			cysZ	b2413	1.02487	0.63607		cysZ	b2413	-1.61102	0.503783		cysZ	b2413	-1.89524	0.236277			cysZ	b2413	0.903058	0.812578		cysZ	b2413	0.470101	0.838614		cysZ	b2413	-0.13495	0.990197
cytR	b3934	-1.75143	0.0193094		cytR	b3934	-0.56077	0.664571		cytR	b3934	-0.188113	0.972653			cytR	b3934	-1.17977	0.199845		cytR	b3934	-0.0985381	0.978051		cytR	b3934	0.618514	0.647399			cytR	b3934	-1.08264	0.32451		cytR	b3934	1.21098	0.164803		cytR	b3934	-0.197068	0.989937
dacA	b0632	-0.0378746	0.995828		dacA	b0632	-0.839011	0.607271		dacA	b0632	-0.541571	0.947311			dacA	b0632	-0.868578	0.596419		dacA	b0632	-1.38532	0.501436		dacA	b0632	-1.30165	0.356544			dacA	b0632	-0.21406	0.973152		dacA	b0632	0.112793	0.958157		dacA	b0632	-0.282102	0.989937
dacB	b3182	-0.225808	0.954545		dacB	b3182	-1.00808	0.20395		dacB	b3182	0.567428	0.851284			dacB	b3182	0.000417329	0.999922		dacB	b3182	-0.399925	0.903624		dacB	b3182	0.000511563	0.999689			dacB	b3182	0.0773751	0.978613		dacB	b3182	0.158271	0.909897		dacB	b3182	0.350201	0.986829
dacC	b0839	-0.238403	0.946716		dacC	b0839	0.486748	0.656961		dacC	b0839	1.31794	0.0604688			dacC	b0839	0.0846968	0.949696		dacC	b0839	-0.31954	0.918257		dacC	b0839	0.930486	0.276184			dacC	b0839	-0.709237	0.54824		dacC	b0839	-1.27685	0.0421191		dacC	b0839	0.440283	0.984035
dacD	b2010	0.744816	0.785004		dacD	b2010	0.515679	0.691494		dacD	b2010	-0.225398	0.972653			dacD	b2010	-0.259612	0.869689		dacD	b2010	-0.396995	0.91019		dacD	b2010	-0.884514	0.529472			dacD	b2010	0.357118	0.905836		dacD	b2010	0.0677549	0.962598		dacD	b2010	-0.465923	0.986829
dadA	b1189	-0.655205	0.906754		dadA	b1189	-0.910563	0.662961		dadA	b1189	-2.50099	0.0730058			dadA	b1189	-0.160482	0.953375		dadA	b1189	1.538	0.561002		dadA	b1189	-1.83267	0.236277			dadA	b1189	-0.841315	0.830194		dadA	b1189	1.49547	0.328418		dadA	b1189	-2.54081	0.260423
dadX	b1190	-0.968445	0.82116		dadX	b1190	-0.937287	0.668742		dadX	b1190	-1.96203	0.377619			dadX	b1190	-0.229169	0.936758		dadX	b1190	0.982645	0.842314		dadX	b1190	-1.25831	0.512187			dadX	b1190	-1.07622	0.755888		dadX	b1190	0.929586	0.647318		dadX	b1190	-2.2002	0.616831
dam	b3387	0.128875	0.969192		dam	b3387	-0.249102	0.86945		dam	b3387	-0.127358	0.981107			dam	b3387	0.775645	0.416141		dam	b3387	-0.210797	0.957531		dam	b3387	0.0866614	0.948203			dam	b3387	0.23346	0.93471		dam	b3387	0.042715	0.971774		dam	b3387	-0.0151921	0.995884
damX	b3388	-0.562612	0.507972		damX	b3388	-0.231108	0.789561		damX	b3388	-0.142614	0.970424			damX	b3388	-0.359226	0.603664		damX	b3388	0.12956	0.96163		damX	b3388	-0.0521045	0.948203			damX	b3388	-0.360512	0.755155		damX	b3388	0.429391	0.459261		damX	b3388	0.376869	0.984035
dapA	b2478	-0.0984927	0.971516		dapA	b2478	-0.346306	0.702732		dapA	b2478	-0.565218	0.685534			dapA	b2478	0.139725	0.895774		dapA	b2478	-0.0369707	0.984426		dapA	b2478	0.0842181	0.927611			dapA	b2478	0.372869	0.807278		dapA	b2478	-0.227187	0.811156		dapA	b2478	-0.545159	0.9763
dapB	b0031	-0.616074	0.780493		dapB	b0031	0.350879	0.828967		dapB	b0031	0.678257	0.819756			dapB	b0031	-0.880009	0.378967		dapB	b0031	-0.287453	0.941174		dapB	b0031	-0.720897	0.540247			dapB	b0031	-1.15825	0.233745		dapB	b0031	-0.163665	0.915151		dapB	b0031	-0.284333	0.989491
dapD	b0166	-0.0809005	0.974294		dapD	b0166	0.0308925	0.986988		dapD	b0166	0.172894	0.972462			dapD	b0166	-0.190575	0.869841		dapD	b0166	-0.0174239	0.993469		dapD	b0166	0.746493	0.40426			dapD	b0166	0.207693	0.937336		dapD	b0166	-0.735038	0.298964		dapD	b0166	-0.186051	0.989937
dapE	b2472	-0.306872	0.9509		dapE	b2472	-0.197128	0.928739		dapE	b2472	-0.378066	0.958124			dapE	b2472	-0.16151	0.927343		dapE	b2472	-0.34463	0.937985		dapE	b2472	-0.307096	0.841916			dapE	b2472	-0.0406774	0.992791		dapE	b2472	-0.170884	0.922376		dapE	b2472	-0.0519601	0.990197
dapF	b3809	0.188669	0.946716		dapF	b3809	-0.3322	0.702748		dapF	b3809	-0.793977	0.490093			dapF	b3809	-0.174545	0.851486		dapF	b3809	-0.0465044	0.978051		dapF	b3809	-0.371011	0.725442			dapF	b3809	-0.253927	0.878843		dapF	b3809	-0.258841	0.756169		dapF	b3809	-1.1667	0.284212
dauA	b1206	-0.645768	0.794263		dauA	b1206	-0.598059	0.636966		dauA	b1206	-0.270722	0.970424			dauA	b1206	-0.241268	0.889838		dauA	b1206	-1.01479	0.50573		dauA	b1206	-0.839577	0.451996			dauA	b1206	-0.142921	0.973152		dauA	b1206	-0.234372	0.87951		dauA	b1206	0.248651	0.989937
dbpA	b1343	-0.162774	0.957396		dbpA	b1343	-0.758269	0.280555		dbpA	b1343	-0.264011	0.958124			dbpA	b1343	-0.0601793	0.962133		dbpA	b1343	0.0694042	0.978051		dbpA	b1343	-0.325197	0.762358			dbpA	b1343	-0.168264	0.955347		dbpA	b1343	-0.644825	0.374718		dbpA	b1343	-0.129276	0.989937
dcd	b2065	-0.151888	0.957396		dcd	b2065	0.153059	0.895196		dcd	b2065	-0.190229	0.970424			dcd	b2065	-0.42097	0.592087		dcd	b2065	-0.157538	0.957531		dcd	b2065	0.108338	0.907191			dcd	b2065	-0.327872	0.830194		dcd	b2065	-0.235244	0.790487		dcd	b2065	0.0960995	0.989937
dcm	b1961	-0.313183	0.938194		dcm	b1961	-0.0357751	0.986988		dcm	b1961	-0.160674	0.981107			dcm	b1961	-0.5863	0.616681		dcm	b1961	-0.357902	0.920029		dcm	b1961	-0.444147	0.771766			dcm	b1961	-0.121816	0.973152		dcm	b1961	0.0418029	0.975022		dcm	b1961	-0.325041	0.989491
dcp	b1538	-0.0841896	0.974294		dcp	b1538	0.0979233	0.956819		dcp	b1538	-0.163234	0.972462			dcp	b1538	0.15078	0.899655		dcp	b1538	0.0333434	0.985837		dcp	b1538	-0.351677	0.739039			dcp	b1538	-0.12586	0.973152		dcp	b1538	-0.668484	0.354317		dcp	b1538	-0.443477	0.984035
dcrB	b3472	-0.418718	0.887887		dcrB	b3472	-0.204703	0.89993		dcrB	b3472	-0.0780316	0.988913			dcrB	b3472	-0.472381	0.694993		dcrB	b3472	0.126601	0.971858		dcrB	b3472	-0.264602	0.843069			dcrB	b3472	0.00416028	0.999278		dcrB	b3472	0.711095	0.433504		dcrB	b3472	-0.124543	0.990197
dctA	b3528	-1.05594	0.779976		dctA	b3528	1.74316	0.235525		dctA	b3528	1.36088	0.638219			dctA	b3528	-0.83667	0.693733		dctA	b3528	2.16264	0.199642		dctA	b3528	0.629864	0.764792			dctA	b3528	-1.52159	0.499522		dctA	b3528	2.50325	0.0403088		dctA	b3528	-0.637145	0.986829
dctR	b3507	0.0123548	0.997717		dctR	b3507	-1.01936	0.290633		dctR	b3507	0.347995	0.958124			dctR	b3507	0.48586	0.694993		dctR	b3507	-0.423603	0.916205		dctR	b3507	0.603691	0.626885			dctR	b3507	1.01267	0.367672		dctR	b3507	-1.03898	0.252321		dctR	b3507	0.831828	0.9763
dcuA	b4138	-0.252397	0.946716		dcuA	b4138	-0.28147	0.840146		dcuA	b4138	-0.263105	0.970424			dcuA	b4138	0.170795	0.895774		dcuA	b4138	0.446104	0.867153		dcuA	b4138	-0.124452	0.919895			dcuA	b4138	0.202848	0.94345		dcuA	b4138	0.219471	0.858098		dcuA	b4138	-0.451134	0.984035
dcuB	b4123	-0.993892	0.832032		dcuB	b4123	1.08193	0.600536		dcuB	b4123	0.407707	0.972653			dcuB	b4123	-0.347136	0.903369		dcuB	b4123	0.842541	0.867153		dcuB	b4123	0.973081	0.786038			dcuB	b4123	0.429575	0.946075		dcuB	b4123	0.614665	0.766047		dcuB	b4123	-0.692369	0.986829
dcuC	b0621	-2.32086	0.430685		dcuC	b0621	0.117365	0.968828		dcuC	b0621	-0.372203	0.972462			dcuC	b0621	-1.6342	0.490116		dcuC	b0621	-0.0473724	0.987172		dcuC	b0621	-0.660517	0.786952			dcuC	b0621	-1.45411	0.703243		dcuC	b0621	0.232611	0.911384		dcuC	b0621	-0.509213	0.989491
dcuD	b3227	2.05234	0.535277		dcuD	b3227	-1.64722	0.200993		dcuD	b3227	-0.192383	0.98124			dcuD	b3227	0.0449207	0.984973		dcuD	b3227	-0.516531	0.928231		dcuD	b3227	0.309684	0.899709			dcuD	b3227	0.796905	0.787132		dcuD	b3227	-0.77393	0.64506		dcuD	b3227	0.0360458	0.993485
dcuR	b4124	0.644933	0.871318		dcuR	b4124	-0.675358	0.644044		dcuR	b4124	0.314397	0.970424			dcuR	b4124	-0.166469	0.934899		dcuR	b4124	0.668083	0.851154		dcuR	b4124	0.216911	0.907191			dcuR	b4124	0.353984	0.929414		dcuR	b4124	-0.171936	0.927063		dcuR	b4124	-0.346705	0.989491
dcuS	b4125	0.504806	0.872084		dcuS	b4125	-0.453698	0.757223		dcuS	b4125	-0.151577	0.981107			dcuS	b4125	0.165017	0.919312		dcuS	b4125	-0.00610735	0.998054		dcuS	b4125	0.462154	0.771766			dcuS	b4125	0.00556966	0.999278		dcuS	b4125	0.113513	0.940029		dcuS	b4125	-0.686286	0.984035
dcyD	b1919	0.0598801	0.984662		dcyD	b1919	0.606493	0.571654		dcyD	b1919	0.5451	0.85206			dcyD	b1919	-0.224714	0.869841		dcyD	b1919	0.224944	0.957531		dcyD	b1919	0.435827	0.718888			dcyD	b1919	-0.474004	0.813631		dcyD	b1919	-0.493288	0.641137		dcyD	b1919	0.165111	0.989937
ddlA	b0381	-0.186808	0.939493		ddlA	b0381	-0.122331	0.91151		ddlA	b0381	-0.475839	0.744927			ddlA	b0381	-0.00920471	0.994812		ddlA	b0381	0.155007	0.953016		ddlA	b0381	0.538596	0.461999			ddlA	b0381	0.185197	0.915197		ddlA	b0381	-0.0783167	0.934488		ddlA	b0381	-0.183333	0.989491
ddlB	b0092	-0.00629155	0.997717		ddlB	b0092	-0.331532	0.657115		ddlB	b0092	-0.00595512	0.997544			ddlB	b0092	-0.127453	0.892533		ddlB	b0092	-0.212372	0.926164		ddlB	b0092	0.404931	0.563241			ddlB	b0092	-0.277501	0.837393		ddlB	b0092	0.039392	0.963309		ddlB	b0092	0.288431	0.986829
ddpA	b1487	0.846846	0.538224		ddpA	b1487	1.79353	0.00686941		ddpA	b1487	1.61204	0.0224615			ddpA	b1487	2.02441	0.000536139		ddpA	b1487	-0.300173	0.931415		ddpA	b1487	0.660969	0.542513			ddpA	b1487	0.495208	0.785764		ddpA	b1487	-1.9204	0.000947154		ddpA	b1487	-0.1234	0.990197
ddpB	b1486	-0.00422167	0.999441		ddpB	b1486	1.89169	0.0415353		ddpB	b1486	1.15015	0.549844			ddpB	b1486	2.58215	0.00576201		ddpB	b1486	0.429878	0.916233		ddpB	b1486	0.627355	0.69559			ddpB	b1486	-0.164751	0.973152		ddpB	b1486	-1.18373	0.178979		ddpB	b1486	0.078223	0.990197
ddpC	b1485	0.447364	0.902536		ddpC	b1485	1.13409	0.263864		ddpC	b1485	0.872147	0.754209			ddpC	b1485	0.957489	0.401703		ddpC	b1485	0.333188	0.936428		ddpC	b1485	-0.302514	0.854294			ddpC	b1485	0.0852088	0.982774		ddpC	b1485	-1.09121	0.186222		ddpC	b1485	-0.348928	0.986829
ddpD	b1484	0.144537	0.97305		ddpD	b1484	0.210417	0.918898		ddpD	b1484	1.568	0.0740805			ddpD	b1484	0.947734	0.42985		ddpD	b1484	0.548596	0.867153		ddpD	b1484	1.33299	0.205716			ddpD	b1484	-0.541161	0.813631		ddpD	b1484	-1.24613	0.136372		ddpD	b1484	0.971315	0.959079
ddpF	b1483	0.892138	0.577446		ddpF	b1483	0.304852	0.854711		ddpF	b1483	0.432747	0.921494			ddpF	b1483	-0.579327	0.631705		ddpF	b1483	-0.336608	0.929668		ddpF	b1483	0.38214	0.768343			ddpF	b1483	-0.491665	0.830194		ddpF	b1483	-0.752364	0.441084		ddpF	b1483	-0.676001	0.983105
ddpX	b1488	1.90656	0.0783341		ddpX	b1488	2.87851	0.000998929		ddpX	b1488	1.8218	0.0330978			ddpX	b1488	1.55277	0.0952231		ddpX	b1488	-0.589512	0.843825		ddpX	b1488	1.31478	0.247821			ddpX	b1488	1.02282	0.441054		ddpX	b1488	-2.16894	0.00209695		ddpX	b1488	-0.123979	0.990197
deaD	b3162	-0.140252	0.973724		deaD	b3162	-0.123812	0.965799		deaD	b3162	-1.114	0.540307			deaD	b3162	-0.135887	0.94415		deaD	b3162	-0.741489	0.794701		deaD	b3162	-0.901115	0.455437			deaD	b3162	0.556315	0.842214		deaD	b3162	0.963042	0.383552		deaD	b3162	0.568064	0.986829
dedA	b2317	0.458497	0.802968		dedA	b2317	0.123408	0.935398		dedA	b2317	-0.14072	0.972653			dedA	b2317	0.12112	0.918262		dedA	b2317	-0.261179	0.922639		dedA	b2317	-0.217394	0.838675			dedA	b2317	0.472855	0.739148		dedA	b2317	0.272368	0.772643		dedA	b2317	0.0333612	0.990561
dedD	b2314	-0.323582	0.87469		dedD	b2314	0.491628	0.541314		dedD	b2314	0.12031	0.977085			dedD	b2314	-0.757807	0.257129		dedD	b2314	-0.442434	0.797238		dedD	b2314	-0.604156	0.443813			dedD	b2314	-0.592947	0.560915		dedD	b2314	0.0906028	0.935897		dedD	b2314	-0.133268	0.989937
def	b3287	0.300597	0.906545		def	b3287	0.569086	0.468056		def	b3287	0.300952	0.941427			def	b3287	0.0328973	0.980787		def	b3287	0.216074	0.942525		def	b3287	0.146042	0.88698			def	b3287	0.0897733	0.973152		def	b3287	0.542715	0.462806		def	b3287	0.0886842	0.990197
degP	b0161	-0.612119	0.777063		degP	b0161	0.220363	0.893192		degP	b0161	-0.0601374	0.991827			degP	b0161	-0.70004	0.522135		degP	b0161	0.488343	0.867153		degP	b0161	0.121436	0.923238			degP	b0161	-0.380192	0.88708		degP	b0161	0.612182	0.533615		degP	b0161	0.0251343	0.991522
degQ	b3234	-0.0129423	0.997717		degQ	b3234	0.0846987	0.964965		degQ	b3234	0.196548	0.970424			degQ	b3234	0.593513	0.498797		degQ	b3234	0.228505	0.941174		degQ	b3234	0.583594	0.510319			degQ	b3234	0.128136	0.973152		degQ	b3234	-0.235926	0.824243		degQ	b3234	0.498266	0.984035
degS	b3235	0.0880807	0.974294		degS	b3235	0.129735	0.939433		degS	b3235	0.122926	0.981107			degS	b3235	0.010612	0.995844		degS	b3235	-0.146281	0.964932		degS	b3235	0.0907443	0.944137			degS	b3235	0.0802927	0.975801		degS	b3235	0.394138	0.665284		degS	b3235	-0.0149624	0.995884
deoA	b4382	-0.640698	0.579314		deoA	b4382	-1.63786	0.000294452		deoA	b4382	-1.08288	0.0718934			deoA	b4382	-0.0756452	0.948895		deoA	b4382	0.365741	0.869908		deoA	b4382	-0.160467	0.866993			deoA	b4382	-0.426352	0.775731		deoA	b4382	0.760048	0.224617		deoA	b4382	0.487543	0.983105
deoB	b4383	-0.267094	0.933825		deoB	b4383	-0.109081	0.953065		deoB	b4383	-0.432715	0.894723			deoB	b4383	0.00100697	0.99934		deoB	b4383	0.269415	0.933702		deoB	b4383	-0.799391	0.312815			deoB	b4383	-0.20495	0.943329		deoB	b4383	0.579339	0.496686		deoB	b4383	0.113048	0.990197
deoC	b4381	0.531705	0.839443		deoC	b4381	0.58943	0.631001		deoC	b4381	0.266078	0.970424			deoC	b4381	0.366014	0.810874		deoC	b4381	0.14667	0.971858		deoC	b4381	-0.971413	0.314571			deoC	b4381	0.895924	0.524581		deoC	b4381	0.197394	0.895772		deoC	b4381	0.742289	0.9763
deoD	b4384	-0.0745051	0.974294		deoD	b4384	0.0966206	0.956819		deoD	b4384	-0.164079	0.972462			deoD	b4384	0.259163	0.827058		deoD	b4384	0.110043	0.971858		deoD	b4384	-0.448027	0.619528			deoD	b4384	-0.305475	0.890851		deoD	b4384	0.299173	0.768331		deoD	b4384	-0.121731	0.989937
deoR	b0840	0.152246	0.966713		deoR	b0840	0.404214	0.723599		deoR	b0840	0.246282	0.970424			deoR	b0840	0.110702	0.937419		deoR	b0840	-0.126484	0.971213		deoR	b0840	0.332109	0.810307			deoR	b0840	0.0563536	0.987924		deoR	b0840	-0.178036	0.883715		deoR	b0840	-0.215309	0.989937
der	b2511	0.01615	0.994051		der	b2511	0.585617	0.221003		der	b2511	0.465836	0.62166			der	b2511	0.275543	0.694993		der	b2511	0.160636	0.940372		der	b2511	0.186142	0.798742			der	b2511	-0.123321	0.951212		der	b2511	0.708254	0.087419		der	b2511	0.378616	0.983105
dfp	b3639	0.270552	0.957396		dfp	b3639	0.821436	0.493187		dfp	b3639	-0.091346	0.989896			dfp	b3639	0.158858	0.93499		dfp	b3639	-0.206406	0.964932		dfp	b3639	-0.54775	0.708069			dfp	b3639	0.563993	0.833538		dfp	b3639	-0.0894155	0.957216		dfp	b3639	-0.424899	0.986829
dgcZ	b1535	0.178451	0.973724		dgcZ	b1535	0.301119	0.898848		dgcZ	b1535	-0.725729	0.903221			dgcZ	b1535	-0.135636	0.953375		dgcZ	b1535	-1.46835	0.37897		dgcZ	b1535	-1.99567	0.126389			dgcZ	b1535	0.222785	0.973152		dgcZ	b1535	1.35405	0.245306		dgcZ	b1535	-0.119879	0.990197
dgkA	b4042	-0.166657	0.96293		dgkA	b4042	0.154109	0.935398		dgkA	b4042	-0.299732	0.970424			dgkA	b4042	-0.473208	0.63607		dgkA	b4042	0.0134442	0.99443		dgkA	b4042	-0.531237	0.753572			dgkA	b4042	-0.193235	0.94345		dgkA	b4042	-0.0811871	0.950864		dgkA	b4042	-0.713784	0.984035
dgoA	b4477	-0.657163	0.911252		dgoA	b4477	-2.67701	0.00494249		dgoA	b4477	-1.67726	0.445689			dgoA	b4477	-0.868521	0.664028		dgoA	b4477	-2.54051	0.0196988		dgoA	b4477	-2.88201	0.0168641			dgoA	b4477	-0.370052	0.946891		dgoA	b4477	0.12359	0.956314		dgoA	b4477	0.436388	0.989491
dgoD	b4478	-0.522843	0.915699		dgoD	b4478	-1.89801	0.0715641		dgoD	b4478	-1.86147	0.218105			dgoD	b4478	-0.820777	0.615409		dgoD	b4478	-2.38886	0.0200246		dgoD	b4478	-2.95073	0.00703031			dgoD	b4478	-1.07875	0.629396		dgoD	b4478	-0.427157	0.819288		dgoD	b4478	0.23345	0.989937
dgoK	b3693	-0.234763	0.961729		dgoK	b3693	-2.83789	1.85554e-05		dgoK	b3693	-2.01189	0.0360341			dgoK	b3693	-0.0218002	0.992124		dgoK	b3693	-2.42012	0.00123258		dgoK	b3693	-2.50012	0.00695256			dgoK	b3693	-0.387259	0.906212		dgoK	b3693	0.35216	0.819288		dgoK	b3693	0.497848	0.986829
dgoR	b4479	0.11209	0.977239		dgoR	b4479	-1.94164	0.038246		dgoR	b4479	-1.9077	0.114251			dgoR	b4479	-0.607083	0.72068		dgoR	b4479	-2.35512	0.0110642		dgoR	b4479	-2.46665	0.0183934			dgoR	b4479	-0.612816	0.836885		dgoR	b4479	0.0702472	0.970047		dgoR	b4479	0.277338	0.989937
dgoT	b3691	-0.470087	0.95159		dgoT	b3691	-0.82447	0.657332		dgoT	b3691	-0.326936	0.972462			dgoT	b3691	0.224702	0.935599		dgoT	b3691	-0.830331	0.839313		dgoT	b3691	-2.01953	0.141381			dgoT	b3691	-0.654263	0.862729		dgoT	b3691	0.263979	0.909631		dgoT	b3691	1.11624	0.983105
dgt	b0160	-0.144937	0.967179		dgt	b0160	-0.300058	0.85156		dgt	b0160	-0.392461	0.958124			dgt	b0160	-0.173821	0.895774		dgt	b0160	-0.230491	0.957531		dgt	b0160	-0.35242	0.838489			dgt	b0160	-0.226763	0.93347		dgt	b0160	-1.17241	0.0989936		dgt	b0160	-0.75949	0.984035
dhaK	b1200	0.766079	0.871318		dhaK	b1200	3.10936	0.00494249		dhaK	b1200	1.44186	0.607476			dhaK	b1200	0.720848	0.749599		dhaK	b1200	0.18943	0.977113		dhaK	b1200	-0.776587	0.701664			dhaK	b1200	-0.685681	0.870654		dhaK	b1200	1.61301	0.25066		dhaK	b1200	-3.30808	0.0107743
dhaL	b1199	0.389041	0.956573		dhaL	b1199	2.14343	0.0945036		dhaL	b1199	1.14007	0.791249			dhaL	b1199	0.310469	0.895774		dhaL	b1199	0.110576	0.978051		dhaL	b1199	-1.54691	0.34206			dhaL	b1199	-0.442068	0.930294		dhaL	b1199	0.904104	0.598625		dhaL	b1199	-3.39921	0.00956268
dhaM	b1198	0.261725	0.96293		dhaM	b1198	2.07021	0.0608661		dhaM	b1198	1.46534	0.478494			dhaM	b1198	-0.3325	0.882063		dhaM	b1198	-0.000820121	0.999733		dhaM	b1198	-0.313539	0.868595			dhaM	b1198	-0.930301	0.728533		dhaM	b1198	1.1318	0.396222		dhaM	b1198	-2.46172	0.0945415
dhaR	b1201	0.513041	0.793617		dhaR	b1201	-0.453859	0.662961		dhaR	b1201	0.114399	0.981107			dhaR	b1201	0.501028	0.589409		dhaR	b1201	-0.0640574	0.978051		dhaR	b1201	0.832479	0.430972			dhaR	b1201	-0.198588	0.934497		dhaR	b1201	-0.775656	0.263514		dhaR	b1201	0.060118	0.990197
diaA	b3149	-0.375477	0.82116		diaA	b3149	-0.167845	0.891641		diaA	b3149	-0.00896643	0.996787			diaA	b3149	-0.643845	0.324339		diaA	b3149	-0.468853	0.744762		diaA	b3149	0.305725	0.774378			diaA	b3149	-0.175691	0.93471		diaA	b3149	-0.0489037	0.962115		diaA	b3149	-0.51142	0.983105
dicA	b1570	0.361315	0.954871		dicA	b1570	0.0161528	0.994331		dicA	b1570	0.515308	0.958124			dicA	b1570	0.123929	0.95326		dicA	b1570	-0.17481	0.972127		dicA	b1570	0.129104	0.95765			dicA	b1570	0.767132	0.766868		dicA	b1570	-0.450479	0.792711		dicA	b1570	-0.469052	0.986829
dicB	b1575	-2.18466	NA		dicB	b1575	1.03427	NA		dicB	b1575	1.93344	NA			dicB	b1575	0.316584	NA		dicB	b1575	0.706877	NA		dicB	b1575	0.995683	NA			dicB	b1575	2.82815	NA		dicB	b1575	1.61179	NA		dicB	b1575	0.427274	NA
dicC	b1569	0.794178	NA		dicC	b1569	0.770031	NA		dicC	b1569	1.93274	NA			dicC	b1569	-0.420918	NA		dicC	b1569	-1.34868	NA		dicC	b1569	0.995685	NA			dicC	b1569	1.15319	NA		dicC	b1569	-1.84323	NA		dicC	b1569	2.51312	NA
dicF	b1574	0.773654	NA		dicF	b1574	0.770024	NA		dicF	b1574	1.93427	NA			dicF	b1574	1.62504	NA		dicF	b1574	-0.485864	NA		dicF	b1574	0.995675	NA			dicF	b1574	0.849193	NA		dicF	b1574	0.743517	NA		dicF	b1574	2.5131	NA
dinB	b0231	-0.32625	0.957396		dinB	b0231	-0.780574	0.579295		dinB	b0231	-0.503895	0.970424			dinB	b0231	-0.0601491	0.980787		dinB	b0231	0.300522	0.957531		dinB	b0231	-0.817322	0.709629			dinB	b0231	0.209728	0.973152		dinB	b0231	0.360676	0.830588		dinB	b0231	-0.187677	0.990197
dinD	b3645	-1.23575	0.714566		dinD	b3645	1.06614	0.560768		dinD	b3645	0.394435	0.970424			dinD	b3645	-0.990812	0.621544		dinD	b3645	-0.239063	0.965947		dinD	b3645	-0.459543	0.843069			dinD	b3645	-0.541914	0.91225		dinD	b3645	0.769334	0.637537		dinD	b3645	0.48308	0.989491
dinF	b4044	-0.0533626	0.985526		dinF	b4044	1.25087	0.201116		dinF	b4044	-0.141121	0.98145			dinF	b4044	-0.0708771	0.976157		dinF	b4044	1.44669	0.216895		dinF	b4044	0.192695	0.920303			dinF	b4044	0.307692	0.94254		dinF	b4044	1.38069	0.108829		dinF	b4044	0.0943983	0.990197
dinG	b0799	-0.301169	0.913068		dinG	b0799	-0.759472	0.308098		dinG	b0799	0.205954	0.970424			dinG	b0799	-0.661589	0.42651		dinG	b0799	-0.150629	0.964932		dinG	b0799	0.0957441	0.935115			dinG	b0799	0.0916105	0.974775		dinG	b0799	0.00315729	0.997676		dinG	b0799	0.511773	0.984035
dinI	b1061	0.590499	0.94124		dinI	b1061	-1.11003	0.589517		dinI	b1061	-0.5279	0.970424			dinI	b1061	1.10717	0.625373		dinI	b1061	-1.27467	0.710141		dinI	b1061	-0.959792	0.717204			dinI	b1061	1.47224	0.578537		dinI	b1061	-0.321113	0.905429		dinI	b1061	-0.337727	0.989937
dinJ	b0226	1.15944	0.304233		dinJ	b0226	0.688709	0.428995		dinJ	b0226	0.246538	0.970424			dinJ	b0226	1.51666	0.028499		dinJ	b0226	0.179464	0.964234		dinJ	b0226	0.596762	0.54646			dinJ	b0226	1.59822	0.0128306		dinJ	b0226	0.651055	0.433664		dinJ	b0226	0.373979	0.986829
dinQ	b4613	0.31335	0.956467		dinQ	b4613	-0.974731	0.309926		dinQ	b4613	0.083274	0.990431			dinQ	b4613	0.889753	0.525542		dinQ	b4613	0.469016	0.903624		dinQ	b4613	0.922597	0.542454			dinQ	b4613	0.22199	0.961651		dinQ	b4613	1.13854	0.20994		dinQ	b4613	0.295846	0.989851
djlA	b0055	-0.115933	0.973724		djlA	b0055	0.140407	0.939433		djlA	b0055	-0.593328	0.889147			djlA	b0055	-0.491782	0.653428		djlA	b0055	-0.116883	0.971858		djlA	b0055	-0.290602	0.854294			djlA	b0055	-0.369961	0.86689		djlA	b0055	0.335517	0.756169		djlA	b0055	-1.06041	0.939304
djlB	b0646	-0.977627	NA		djlB	b0646	-0.87805	NA		djlB	b0646	0.601518	NA			djlB	b0646	-0.414853	NA		djlB	b0646	-0.690616	NA		djlB	b0646	1.57564	NA			djlB	b0646	0.428879	0.973152		djlB	b0646	-0.379193	NA		djlB	b0646	0.651749	0.989491
djlC	b0649	0.375452	0.957396		djlC	b0649	1.24647	0.380621		djlC	b0649	0.390386	0.970424			djlC	b0649	0.0558941	0.983214		djlC	b0649	0.0745547	0.984238		djlC	b0649	0.34442	0.87014			djlC	b0649	-0.354698	0.943329		djlC	b0649	0.192895	0.926123		djlC	b0649	0.758307	0.985725
dkgA	b3012	0.879594	0.646448		dkgA	b3012	0.206236	0.924132		dkgA	b3012	0.445077	0.93626			dkgA	b3012	0.440704	0.778993		dkgA	b3012	0.440446	0.910903		dkgA	b3012	0.158748	0.91404			dkgA	b3012	0.434536	0.890851		dkgA	b3012	-0.818555	0.444991		dkgA	b3012	0.232239	0.989937
dkgB	b0207	-0.245373	0.97305		dkgB	b0207	0.293581	0.902888		dkgB	b0207	-0.729627	0.919461			dkgB	b0207	0.870908	0.728041		dkgB	b0207	-0.408623	0.937985		dkgB	b0207	-1.16943	0.540106			dkgB	b0207	0.689458	0.874083		dkgB	b0207	0.575221	0.715888		dkgB	b0207	-1.11221	0.983105
dksA	b0145	0.0717409	0.974994		dksA	b0145	0.314735	0.789561		dksA	b0145	0.308583	0.943457			dksA	b0145	-0.27784	0.813211		dksA	b0145	0.10113	0.973619		dksA	b0145	0.188559	0.854663			dksA	b0145	-0.498062	0.755155		dksA	b0145	0.875183	0.190801		dksA	b0145	0.395105	0.986829
dld	b2133	0.128375	0.95818		dld	b2133	-0.283245	0.751022		dld	b2133	0.308702	0.903221			dld	b2133	0.247408	0.789908		dld	b2133	0.0358108	0.984426		dld	b2133	0.775561	0.223115			dld	b2133	0.100303	0.973152		dld	b2133	-0.534979	0.378194		dld	b2133	-0.0275993	0.990561
dmlA	b1800	-0.938661	0.64271		dmlA	b1800	-1.43284	0.267793		dmlA	b1800	-1.57017	0.596755			dmlA	b1800	-0.0656953	0.977597		dmlA	b1800	-2.32381	0.028742		dmlA	b1800	-1.77738	0.310255			dmlA	b1800	0.133798	0.973152		dmlA	b1800	-1.29731	0.287818		dmlA	b1800	-0.690973	0.986829
dmlR	b1799	-0.730379	0.839443		dmlR	b1799	-0.0196521	0.994331		dmlR	b1799	0.27211	0.972462			dmlR	b1799	-0.275494	0.89773		dmlR	b1799	0.266436	0.964932		dmlR	b1799	0.21161	0.91988			dmlR	b1799	-1.19845	0.548087		dmlR	b1799	0.706757	0.667878		dmlR	b1799	-1.29252	0.973753
dmsA	b0894	-0.11268	0.974294		dmsA	b0894	-0.267346	0.893192		dmsA	b0894	0.0843202	0.99084			dmsA	b0894	0.457233	0.787985		dmsA	b0894	-0.798491	0.719884		dmsA	b0894	-0.485757	0.774587			dmsA	b0894	0.0418756	0.992717		dmsA	b0894	-0.37262	0.800846		dmsA	b0894	0.065919	0.990197
dmsB	b0895	0.993566	0.861752		dmsB	b0895	2.11631	0.130911		dmsB	b0895	0.0694294	0.996787			dmsB	b0895	0.448641	0.865059		dmsB	b0895	1.08353	0.719884		dmsB	b0895	-2.3962	0.327755			dmsB	b0895	1.4115	0.601072		dmsB	b0895	1.1055	0.438608		dmsB	b0895	-0.355297	0.990197
dmsC	b0896	-0.488752	0.870971		dmsC	b0896	0.91266	0.332795		dmsC	b0896	0.113098	0.984816			dmsC	b0896	0.150991	0.929568		dmsC	b0896	0.724239	0.708204		dmsC	b0896	0.206564	0.897744			dmsC	b0896	0.42673	0.86689		dmsC	b0896	0.409816	0.71644		dmsC	b0896	-0.0272718	0.992032
dmsD	b1591	-0.0916202	0.974294		dmsD	b1591	0.831531	0.382791		dmsD	b1591	0.184231	0.972922			dmsD	b1591	-0.709447	0.42985		dmsD	b1591	0.302498	0.932349		dmsD	b1591	0.123763	0.935947			dmsD	b1591	-0.396124	0.839847		dmsD	b1591	0.252264	0.840683		dmsD	b1591	0.29571	0.989491
dnaA	b3702	-0.0676591	0.974294		dnaA	b3702	0.486121	0.517126		dnaA	b3702	0.0391162	0.991827			dnaA	b3702	0.24044	0.814116		dnaA	b3702	-0.0100636	0.994815		dnaA	b3702	0.0749623	0.935115			dnaA	b3702	0.104952	0.973152		dnaA	b3702	0.771061	0.176641		dnaA	b3702	0.619555	0.959079
dnaB	b4052	-0.0826665	0.974294		dnaB	b4052	-0.231004	0.88147		dnaB	b4052	0.151703	0.975152			dnaB	b4052	-1.06124	0.175657		dnaB	b4052	-0.0285621	0.988901		dnaB	b4052	-0.324278	0.792489			dnaB	b4052	-0.318765	0.897492		dnaB	b4052	0.37836	0.723791		dnaB	b4052	-0.416481	0.986829
dnaC	b4361	-0.704921	0.640288		dnaC	b4361	0.359909	0.768493		dnaC	b4361	-0.16336	0.972996			dnaC	b4361	-0.656408	0.490116		dnaC	b4361	-0.106675	0.973619		dnaC	b4361	-0.600933	0.593284			dnaC	b4361	-0.425057	0.819879		dnaC	b4361	-0.208832	0.858478		dnaC	b4361	-0.180888	0.989937
dnaE	b0184	-0.203449	0.893884		dnaE	b0184	-0.303373	0.578721		dnaE	b0184	-0.166496	0.957842			dnaE	b0184	-0.424559	0.392924		dnaE	b0184	-0.190307	0.910903		dnaE	b0184	-0.0061517	0.992056			dnaE	b0184	-0.232436	0.830194		dnaE	b0184	0.355185	0.44441		dnaE	b0184	0.233582	0.986829
dnaG	b3066	-0.286592	0.917569		dnaG	b3066	0.509338	0.58419		dnaG	b3066	0.00239767	0.999069			dnaG	b3066	-0.607772	0.509895		dnaG	b3066	-0.173476	0.96163		dnaG	b3066	0.0552899	0.960028			dnaG	b3066	-0.314958	0.890851		dnaG	b3066	1.47391	0.00957856		dnaG	b3066	0.573156	0.983105
dnaJ	b0015	-0.486088	0.831952		dnaJ	b0015	1.0268	0.167561		dnaJ	b0015	0.278394	0.958124			dnaJ	b0015	-0.755782	0.42651		dnaJ	b0015	0.0320361	0.985954		dnaJ	b0015	-0.28628	0.804165			dnaJ	b0015	-0.79037	0.516543		dnaJ	b0015	0.850671	0.2655		dnaJ	b0015	0.373799	0.986829
dnaK	b0014	0.198795	0.957396		dnaK	b0014	0.0369009	0.986966		dnaK	b0014	0.0930612	0.98145			dnaK	b0014	-0.862203	0.339117		dnaK	b0014	0.11482	0.973423		dnaK	b0014	0.103766	0.925994			dnaK	b0014	-0.0255062	0.994672		dnaK	b0014	1.41247	0.0285897		dnaK	b0014	0.719786	0.9763
dnaN	b3701	0.239927	0.947224		dnaN	b3701	0.205124	0.891458		dnaN	b3701	-0.0859222	0.984816			dnaN	b3701	0.110979	0.9366		dnaN	b3701	0.019882	0.993469		dnaN	b3701	-0.448514	0.648579			dnaN	b3701	0.148327	0.972574		dnaN	b3701	0.836751	0.249229		dnaN	b3701	0.510651	0.984035
dnaQ	b0215	0.0981027	0.966907		dnaQ	b0215	0.0132534	0.992235		dnaQ	b0215	0.117176	0.972653			dnaQ	b0215	0.037256	0.971511		dnaQ	b0215	0.366055	0.796758		dnaQ	b0215	-0.136325	0.878366			dnaQ	b0215	0.0535817	0.97697		dnaQ	b0215	0.528061	0.293436		dnaQ	b0215	0.317589	0.986829
dnaT	b4362	-0.362481	0.914581		dnaT	b4362	0.441329	0.713571		dnaT	b4362	-0.64397	0.848466			dnaT	b4362	0.391582	0.778485		dnaT	b4362	0.253977	0.947562		dnaT	b4362	-0.513589	0.709629			dnaT	b4362	0.503949	0.807278		dnaT	b4362	0.293626	0.806605		dnaT	b4362	-0.760042	0.983105
dnaX	b0470	-0.274613	0.915699		dnaX	b0470	-0.101587	0.953065		dnaX	b0470	-0.0368384	0.993594			dnaX	b0470	-0.615873	0.476204		dnaX	b0470	0.063259	0.978051		dnaX	b0470	0.0688795	0.947563			dnaX	b0470	-0.342315	0.862729		dnaX	b0470	0.67649	0.333538		dnaX	b0470	0.195559	0.989782
dosC	b1490	0.382918	0.929606		dosC	b1490	-0.00360588	0.998179		dosC	b1490	0.224883	0.972462			dosC	b1490	1.04225	0.393733		dosC	b1490	-0.135424	0.977318		dosC	b1490	0.112173	0.942405			dosC	b1490	0.431614	0.893465		dosC	b1490	-1.06363	0.311849		dosC	b1490	0.571898	0.986829
dosP	b1489	0.0740664	0.984662		dosP	b1489	-0.274914	0.893192		dosP	b1489	0.236461	0.972462			dosP	b1489	0.336898	0.838099		dosP	b1489	0.652834	0.842314		dosP	b1489	-0.0581177	0.971241			dosP	b1489	-0.213187	0.965927		dosP	b1489	-0.662238	0.598625		dosP	b1489	0.744	0.984035
dppA	b3544	-0.989167	0.618612		dppA	b3544	-0.45449	0.789699		dppA	b3544	-0.0381161	0.996787			dppA	b3544	-0.638659	0.659642		dppA	b3544	1.06812	0.557289		dppA	b3544	1.33683	0.201371			dppA	b3544	-1.52162	0.173468		dppA	b3544	0.166248	0.931367		dppA	b3544	-0.563196	0.986829
dppB	b3543	-0.998355	0.70063		dppB	b3543	-0.379313	0.870299		dppB	b3543	-0.383908	0.970424			dppB	b3543	-0.469768	0.813915		dppB	b3543	1.72306	0.243883		dppB	b3543	1.16246	0.435835			dppB	b3543	-1.69421	0.203889		dppB	b3543	0.650506	0.682926		dppB	b3543	-1.18432	0.9763
dppC	b3542	-1.29303	0.490643		dppC	b3542	-0.398366	0.85156		dppC	b3542	0.04689	0.996787			dppC	b3542	-1.30007	0.313681		dppC	b3542	1.2904	0.506828		dppC	b3542	1.44736	0.266758			dppC	b3542	-2.00818	0.047933		dppC	b3542	0.633954	0.676191		dppC	b3542	-1.17378	0.970736
dppD	b3541	-0.97717	0.700734		dppD	b3541	0.149283	0.962564		dppD	b3541	0.208056	0.97889			dppD	b3541	-1.19809	0.392541		dppD	b3541	2.46555	0.0147329		dppD	b3541	1.52963	0.236277			dppD	b3541	-1.96664	0.0776442		dppD	b3541	0.827042	0.557452		dppD	b3541	-0.797662	0.984035
dppF	b3540	-0.943422	0.713861		dppF	b3540	-0.168548	0.955528		dppF	b3540	0.0693599	0.991827			dppF	b3540	-0.645995	0.704119		dppF	b3540	1.59748	0.2943		dppF	b3540	1.49579	0.251534			dppF	b3540	-1.70456	0.17686		dppF	b3540	0.736803	0.625489		dppF	b3540	-0.521966	0.986829
dps	b0812	1.32624	0.128204		dps	b0812	0.392594	0.767959		dps	b0812	0.435087	0.903221			dps	b0812	1.29692	0.0952231		dps	b0812	1.19192	0.228904		dps	b0812	1.43378	0.0555625			dps	b0812	1.40365	0.0776442		dps	b0812	0.722329	0.428252		dps	b0812	0.178562	0.989937
dsbA	b3860	-0.276083	0.952141		dsbA	b3860	0.756705	0.490576		dsbA	b3860	-0.292815	0.970424			dsbA	b3860	-0.73145	0.534443		dsbA	b3860	-1.22341	0.258		dsbA	b3860	-0.988636	0.362724			dsbA	b3860	-0.70696	0.712383		dsbA	b3860	0.319715	0.817345		dsbA	b3860	-0.491016	0.986829
dsbB	b1185	1.68946	0.348616		dsbB	b1185	0.688447	0.572555		dsbB	b1185	0.112993	0.984816			dsbB	b1185	0.0528913	0.979633		dsbB	b1185	-0.508254	0.869908		dsbB	b1185	-0.944391	0.418065			dsbB	b1185	0.253308	0.948197		dsbB	b1185	-0.220905	0.883715		dsbB	b1185	-0.50019	0.986829
dsbC	b2893	0.38448	0.799391		dsbC	b2893	0.279024	0.74201		dsbC	b2893	-0.0373089	0.991827			dsbC	b2893	-0.337922	0.65688		dsbC	b2893	0.350546	0.838709		dsbC	b2893	0.224658	0.813872			dsbC	b2893	-0.127509	0.961838		dsbC	b2893	0.399569	0.529162		dsbC	b2893	-0.302582	0.986829
dsbD	b4136	0.170826	0.952562		dsbD	b4136	-0.668187	0.260591		dsbD	b4136	-0.0450464	0.991827			dsbD	b4136	-0.519732	0.423012		dsbD	b4136	0.459864	0.748527		dsbD	b4136	0.29337	0.766523			dsbD	b4136	0.23273	0.890851		dsbD	b4136	-0.657509	0.230803		dsbD	b4136	-0.130774	0.989937
dsbE	b2195	-0.0497156	0.995828		dsbE	b2195	0.30008	0.935398		dsbE	b2195	-1.57739	0.902741			dsbE	b2195	-0.66185	0.786145		dsbE	b2195	-0.546815	0.935815		dsbE	b2195	-2.29271	0.529472			dsbE	b2195	-0.34004	0.962025		dsbE	b2195	0.633157	0.778441		dsbE	b2195	-1.27751	0.986829
dsbG	b0604	-0.647363	0.825439		dsbG	b0604	0.478416	0.780871		dsbG	b0604	0.0775581	0.991827			dsbG	b0604	0.0316706	0.986946		dsbG	b0604	0.893021	0.691829		dsbG	b0604	0.775294	0.648579			dsbG	b0604	-0.551232	0.830194		dsbG	b0604	0.169745	0.925136		dsbG	b0604	-0.00530076	0.997867
dsdA	b2366	-0.70964	0.713861		dsdA	b2366	0.610384	0.596689		dsdA	b2366	0.253797	0.972462			dsdA	b2366	0.359709	0.81242		dsdA	b2366	0.0471517	0.984656		dsdA	b2366	-0.242583	0.874801			dsdA	b2366	-0.121916	0.973152		dsdA	b2366	0.23208	0.855243		dsdA	b2366	0.423361	0.986829
dsdC	b2364	0.155166	0.974294		dsdC	b2364	0.385594	0.888638		dsdC	b2364	-0.467534	0.972462			dsdC	b2364	0.107482	0.966723		dsdC	b2364	0.130274	0.978051		dsdC	b2364	-0.88119	0.75295			dsdC	b2364	-0.0658292	0.990299		dsdC	b2364	0.485599	0.801865		dsdC	b2364	-0.313599	0.989937
dsdX	b2365	1.56552	0.550754		dsdX	b2365	0.865826	0.59032		dsdX	b2365	0.585038	0.933708			dsdX	b2365	1.35292	0.359643		dsdX	b2365	-0.1754	0.971858		dsdX	b2365	0.976909	0.599686			dsdX	b2365	0.883581	0.698459		dsdX	b2365	-0.0911007	0.961072		dsdX	b2365	0.775798	0.984035
dsrA	b1954	1.14524	0.536377		dsrA	b1954	0.259123	0.899713		dsrA	b1954	0.223328	0.972462			dsrA	b1954	0.898759	0.506422		dsrA	b1954	0.217748	0.964932		dsrA	b1954	0.52452	0.724362			dsrA	b1954	0.765239	0.727367		dsrA	b1954	1.30414	0.176641		dsrA	b1954	0.889183	0.9763
dsrB	b1952	-0.502956	0.917569		dsrB	b1952	-0.520766	0.789561		dsrB	b1952	0.263254	0.972462			dsrB	b1952	-0.0531844	0.983324		dsrB	b1952	-0.993857	0.691829		dsrB	b1952	0.0930554	0.959019			dsrB	b1952	-0.0248843	0.996275		dsrB	b1952	-0.0519057	0.975887		dsrB	b1952	0.707391	0.984035
dtd	b3887	-0.111748	0.973724		dtd	b3887	-0.226254	0.893192		dtd	b3887	0.589607	0.831556			dtd	b3887	-0.0287442	0.984379		dtd	b3887	0.878072	0.576579		dtd	b3887	1.8291	0.0456566			dtd	b3887	-0.661942	0.665007		dtd	b3887	-0.578204	0.55654		dtd	b3887	-0.145635	0.989937
dtpA	b1634	0.254165	0.968553		dtpA	b1634	-1.28584	0.412443		dtpA	b1634	-2.21313	0.127139			dtpA	b1634	0.429715	0.855551		dtpA	b1634	-0.642194	0.91019		dtpA	b1634	-2.31441	0.0834783			dtpA	b1634	0.35243	0.955056		dtpA	b1634	1.49417	0.289088		dtpA	b1634	-0.933976	0.984035
dtpB	b3496	0.251041	0.950875		dtpB	b3496	-0.300248	0.828967		dtpB	b3496	-0.287197	0.958124			dtpB	b3496	-0.00571824	0.997608		dtpB	b3496	0.171191	0.964932		dtpB	b3496	-0.0627379	0.958829			dtpB	b3496	0.505756	0.771528		dtpB	b3496	0.0934762	0.940029		dtpB	b3496	0.173354	0.989937
dtpC	b4130	0.950951	0.82116		dtpC	b4130	0.477566	0.826952		dtpC	b4130	-1.21603	0.851284			dtpC	b4130	-0.32518	0.876625		dtpC	b4130	0.718526	0.851154		dtpC	b4130	-1.36784	0.563241			dtpC	b4130	0.153129	0.974961		dtpC	b4130	0.347828	0.843738		dtpC	b4130	-0.643313	0.986829
dtpD	b0709	-0.430677	0.785004		dtpD	b0709	-1.41619	0.00494249		dtpD	b0709	-1.0499	0.377437			dtpD	b0709	0.430176	0.600753		dtpD	b0709	-0.170874	0.96163		dtpD	b0709	-1.1241	0.216196			dtpD	b0709	0.521726	0.647959		dtpD	b0709	-0.0211757	0.983021		dtpD	b0709	0.45848	0.986829
dusA	b4049	-0.54251	0.762657		dusA	b4049	-0.125011	0.935398		dusA	b4049	-0.352513	0.933708			dusA	b4049	-0.789125	0.314332		dusA	b4049	0.266558	0.926164		dusA	b4049	-0.166442	0.88698			dusA	b4049	-0.474404	0.755155		dusA	b4049	0.478114	0.532017		dusA	b4049	0.078445	0.990197
dusB	b3260	-0.226782	0.967979		dusB	b3260	0.593188	0.751022		dusB	b3260	-0.735091	0.883491			dusB	b3260	-0.221029	0.918305		dusB	b3260	-0.430289	0.937985		dusB	b3260	-0.969687	0.503322			dusB	b3260	-0.0770459	0.990299		dusB	b3260	2.637	0.00601025		dusB	b3260	0.149202	0.990197
dusC	b2140	-0.456239	0.907713		dusC	b2140	0.856142	0.446073		dusC	b2140	0.173875	0.979553			dusC	b2140	-0.485895	0.7606		dusC	b2140	-0.399147	0.918257		dusC	b2140	-0.463056	0.757771			dusC	b2140	-0.746592	0.722141		dusC	b2140	0.678817	0.533806		dusC	b2140	0.491518	0.986829
dut	b3640	-0.145016	0.973724		dut	b3640	0.259418	0.899827		dut	b3640	-0.343119	0.970424			dut	b3640	-0.363164	0.837882		dut	b3640	-0.0211368	0.993469		dut	b3640	-0.41765	0.813872			dut	b3640	-0.213838	0.969807		dut	b3640	0.381039	0.807492		dut	b3640	-0.456986	0.986829
dxr	b0173	0.180989	0.957396		dxr	b0173	0.528439	0.591506		dxr	b0173	-0.583757	0.813479			dxr	b0173	-0.0800987	0.952639		dxr	b0173	-0.622079	0.699867		dxr	b0173	-0.959095	0.264832			dxr	b0173	-0.0161522	0.996097		dxr	b0173	0.866167	0.228477		dxr	b0173	-0.181125	0.989937
dxs	b0420	-0.217211	0.915699		dxs	b0420	-0.14612	0.892952		dxs	b0420	0.0725117	0.98124			dxs	b0420	-0.590826	0.331201		dxs	b0420	-0.367425	0.813074		dxs	b0420	-0.0972437	0.907191			dxs	b0420	-0.349735	0.778548		dxs	b0420	0.439695	0.463866		dxs	b0420	0.302731	0.986829
eaeH	b0297	-2.48932	NA		eaeH	b0297	-0.0430787	NA		eaeH	b0297	-0.0648022	NA			eaeH	b0297	0.409903	NA		eaeH	b0297	1.86408	NA		eaeH	b0297	-0.507014	NA			eaeH	b0297	1.79105	NA		eaeH	b0297	1.72797	NA		eaeH	b0297	0.541803	NA
eamA	b1533	0.572201	0.783456		eamA	b1533	0.455261	0.678508		eamA	b1533	-0.358885	0.958124			eamA	b1533	1.52514	0.0210543		eamA	b1533	0.15463	0.964932		eamA	b1533	0.0677482	0.966519			eamA	b1533	0.898536	0.318498		eamA	b1533	-0.830105	0.228434		eamA	b1533	-0.740202	0.983105
eamB	b2578	0.01374	0.997717		eamB	b2578	0.652468	0.735793		eamB	b2578	-1.14517	0.801719			eamB	b2578	0.699929	0.762599		eamB	b2578	-0.737997	0.843144		eamB	b2578	-0.149711	0.955772			eamB	b2578	-0.280522	0.965684		eamB	b2578	0.668224	0.670735		eamB	b2578	-0.579817	0.986829
ebgA	b3076	-0.920658	0.656483		ebgA	b3076	0.575103	0.716214		ebgA	b3076	-0.330823	0.972462			ebgA	b3076	-0.362158	0.836233		ebgA	b3076	0.325836	0.944679		ebgA	b3076	-1.28808	0.40426			ebgA	b3076	-0.318635	0.930294		ebgA	b3076	0.422622	0.768331		ebgA	b3076	-0.60064	0.986829
ebgC	b3077	1.27415	NA		ebgC	b3077	1.38057	NA		ebgC	b3077	-0.0667965	NA			ebgC	b3077	2.22726	NA		ebgC	b3077	-0.191721	NA		ebgC	b3077	-2.07106	NA			ebgC	b3077	-0.530906	NA		ebgC	b3077	2.78302	NA		ebgC	b3077	-0.0233833	NA
ebgR	b3075	0.310138	0.957396		ebgR	b3075	-0.690576	0.699477		ebgR	b3075	-0.443069	0.970424			ebgR	b3075	-0.672982	0.69652		ebgR	b3075	0.0403436	0.990943		ebgR	b3075	-0.697502	0.757771			ebgR	b3075	-0.165188	0.973152		ebgR	b3075	0.0973942	0.962153		ebgR	b3075	-0.184332	0.990197
ecnA	b4410	-0.967859	0.832032		ecnA	b4410	1.48712	0.368562		ecnA	b4410	-0.738787	0.957842			ecnA	b4410	-0.488789	0.853235		ecnA	b4410	-0.267465	0.96528		ecnA	b4410	-0.353794	0.90843			ecnA	b4410	0.0695167	0.992717		ecnA	b4410	1.03674	0.498077		ecnA	b4410	-0.550021	0.989782
ecnB	b4411	1.1639	0.535277		ecnB	b4411	-0.115053	0.965898		ecnB	b4411	0.355541	0.970424			ecnB	b4411	1.36122	0.252517		ecnB	b4411	-0.945544	0.691829		ecnB	b4411	0.869375	0.512187			ecnB	b4411	0.61098	0.830194		ecnB	b4411	0.627798	0.665284		ecnB	b4411	0.292828	0.989937
eco	b2209	-0.813037	0.656483		eco	b2209	-1.32812	0.131104		eco	b2209	-1.60683	0.0971765			eco	b2209	-1.46896	0.0786713		eco	b2209	-0.670455	0.797238		eco	b2209	-0.839542	0.497734			eco	b2209	-0.627201	0.766785		eco	b2209	0.528652	0.673292		eco	b2209	-0.853322	0.9763
ecpA	b0293	-0.317691	0.956573		ecpA	b0293	-0.503539	0.786081		ecpA	b0293	-0.311789	0.972653			ecpA	b0293	0.449122	0.813515		ecpA	b0293	0.0919222	0.978051		ecpA	b0293	0.735828	0.800142			ecpA	b0293	0.435517	0.897492		ecpA	b0293	0.110377	0.953048		ecpA	b0293	-0.121095	0.990197
ecpB	b0292	-1.39248	NA		ecpB	b0292	-1.35814	NA		ecpB	b0292	1.37599	NA			ecpB	b0292	-1.82307	NA		ecpB	b0292	-1.88799	NA		ecpB	b0292	1.03606	NA			ecpB	b0292	-1.49442	NA		ecpB	b0292	-1.1426	NA		ecpB	b0292	2.68631	NA
ecpC	b0291	-0.484523	0.871318		ecpC	b0291	0.247206	0.891946		ecpC	b0291	-0.570055	0.903221			ecpC	b0291	-0.203134	0.895774		ecpC	b0291	0.07375	0.978051		ecpC	b0291	-1.28711	0.263428			ecpC	b0291	0.476325	0.83947		ecpC	b0291	0.196418	0.892662		ecpC	b0291	-0.213914	0.989937
ecpD	b0290	-0.423983	0.883619		ecpD	b0290	-0.627511	0.47971		ecpD	b0290	-0.62761	0.773262			ecpD	b0290	0.480938	0.692875		ecpD	b0290	-0.101869	0.97596		ecpD	b0290	-0.620029	0.540983			ecpD	b0290	0.256381	0.930294		ecpD	b0290	0.300678	0.785263		ecpD	b0290	0.0752113	0.990197
ecpE	b0289	0.17654	0.972248		ecpE	b0289	-0.712516	0.595398		ecpE	b0289	0.385922	0.958124			ecpE	b0289	0.353781	0.839898		ecpE	b0289	-0.446677	0.916205		ecpE	b0289	0.757265	0.642526			ecpE	b0289	0.0112055	0.99741		ecpE	b0289	-0.370639	0.802648		ecpE	b0289	1.45668	0.805136
ecpR	b0294	-3.45416	NA		ecpR	b0294	-0.71354	NA		ecpR	b0294	3.37034	NA			ecpR	b0294	0.364458	NA		ecpR	b0294	-0.0308631	NA		ecpR	b0294	-0.619679	NA			ecpR	b0294	1.55623	NA		ecpR	b0294	1.92008	NA		ecpR	b0294	2.51312	NA
eda	b1850	-0.0652599	0.984662		eda	b1850	1.16939	0.197864		eda	b1850	0.76039	0.75354			eda	b1850	-0.754066	0.525542		eda	b1850	0.059257	0.983585		eda	b1850	-0.21264	0.877108			eda	b1850	-0.787595	0.665007		eda	b1850	0.0767662	0.961072		eda	b1850	0.0491256	0.990197
edd	b1851	-0.0336859	0.988334		edd	b1851	0.534579	0.622245		edd	b1851	0.0762637	0.98862			edd	b1851	-0.67069	0.512891		edd	b1851	-0.085136	0.978051		edd	b1851	-0.808513	0.40492			edd	b1851	-0.32448	0.901788		edd	b1851	0.163523	0.906421		edd	b1851	-0.636842	0.983105
efeB	b1019	-0.372682	0.915699		efeB	b1019	1.33308	0.206375		efeB	b1019	1.37	0.358903			efeB	b1019	-0.670443	0.565408		efeB	b1019	0.637891	0.830157		efeB	b1019	0.811344	0.594121			efeB	b1019	-1.38898	0.0926783		efeB	b1019	0.534001	0.667262		efeB	b1019	0.656101	0.984035
efeO	b1018	-0.566383	0.750989		efeO	b1018	1.3238	0.0773383		efeO	b1018	0.0710914	0.991827			efeO	b1018	-0.725133	0.408272		efeO	b1018	1.63826	0.0232746		efeO	b1018	0.17279	0.921328			efeO	b1018	-1.16263	0.0921847		efeO	b1018	1.3526	0.0404521		efeO	b1018	-0.274416	0.989937
efp	b4147	0.944566	0.577446		efp	b4147	0.438953	0.763066		efp	b4147	0.0334129	0.996787			efp	b4147	0.405466	0.789908		efp	b4147	-0.429518	0.906253		efp	b4147	-0.393325	0.771766			efp	b4147	0.430347	0.876617		efp	b4147	0.287708	0.843738		efp	b4147	-0.482931	0.986829
elaA	b2267	-0.178731	0.969192		elaA	b2267	0.577695	0.725688		elaA	b2267	0.0666466	0.991827			elaA	b2267	-0.32825	0.855551		elaA	b2267	-0.151793	0.973619		elaA	b2267	-0.0541213	0.974295			elaA	b2267	-0.691663	0.778548		elaA	b2267	-0.544504	0.699684		elaA	b2267	-0.231875	0.989937
elaB	b2266	0.973665	0.589443		elaB	b2266	0.330299	0.860177		elaB	b2266	0.67836	0.832731			elaB	b2266	0.162115	0.929568		elaB	b2266	-0.0972037	0.978051		elaB	b2266	0.289776	0.843069			elaB	b2266	0.0331675	0.994672		elaB	b2266	-0.065299	0.967144		elaB	b2266	-0.0641698	0.990197
elaD	b2269	-0.48694	NA		elaD	b2269	-0.627882	NA		elaD	b2269	-0.652415	NA			elaD	b2269	-3.69594	NA		elaD	b2269	-1.3584	NA		elaD	b2269	0.995688	NA			elaD	b2269	-2.62244	NA		elaD	b2269	-2.44873	NA		elaD	b2269	-1.20646	NA
elbB	b3209	0.225048	0.96293		elbB	b3209	0.426692	0.828967		elbB	b3209	0.215823	0.972996			elbB	b3209	-0.0905318	0.965944		elbB	b3209	0.718577	0.829617		elbB	b3209	0.64855	0.695302			elbB	b3209	-0.34973	0.929287		elbB	b3209	-0.244817	0.892017		elbB	b3209	0.387221	0.986829
elfA	b0938	-0.448333	NA		elfA	b0938	-0.835874	NA		elfA	b0938	-1.87596	NA			elfA	b0938	0.753372	NA		elfA	b0938	-0.139207	NA		elfA	b0938	-0.421472	NA			elfA	b0938	0.61384	0.93471		elfA	b0938	-0.274094	NA		elfA	b0938	-2.25368	0.983105
elfC	b0940	-1.61102	0.555289		elfC	b0940	-0.284213	0.935398		elfC	b0940	-0.1417	0.989896			elfC	b0940	-0.571153	0.833057		elfC	b0940	-1.37405	0.610552		elfC	b0940	-0.391671	0.878673			elfC	b0940	-1.31504	0.64295		elfC	b0940	-1.10575	0.494818		elfC	b0940	-0.626935	0.986829
elfD	b0939	-0.52323	NA		elfD	b0939	0.432536	NA		elfD	b0939	2.13303	NA			elfD	b0939	0.314142	NA		elfD	b0939	1.11252	NA		elfD	b0939	0.937275	NA			elfD	b0939	-1.29818	NA		elfD	b0939	1.80574	NA		elfD	b0939	1.96185	NA
elfG	b0941	-0.740148	0.848761		elfG	b0941	0.0643209	0.986951		elfG	b0941	0.700552	0.902741			elfG	b0941	0.712755	0.734398		elfG	b0941	0.277898	0.964932		elfG	b0941	1.9405	0.260801			elfG	b0941	0.0736485	0.990299		elfG	b0941	-0.16796	0.938999		elfG	b0941	1.18813	0.9763
emrA	b2685	0.208877	0.957396		emrA	b2685	0.0158855	0.994331		emrA	b2685	-0.337582	0.959511			emrA	b2685	0.370491	0.802057		emrA	b2685	0.764765	0.691829		emrA	b2685	-0.437667	0.759539			emrA	b2685	0.457975	0.843634		emrA	b2685	0.701686	0.481942		emrA	b2685	0.238207	0.989937
emrB	b2686	-0.428742	0.797109		emrB	b2686	0.186882	0.879726		emrB	b2686	0.181217	0.972462			emrB	b2686	-0.165948	0.876625		emrB	b2686	-0.0442089	0.981094		emrB	b2686	-0.840714	0.263428			emrB	b2686	-0.176137	0.943329		emrB	b2686	0.454246	0.524378		emrB	b2686	0.0828604	0.990197
emrD	b3673	0.421776	0.957396		emrD	b3673	0.697154	0.780813		emrD	b3673	-0.56	0.970424			emrD	b3673	0.315795	0.906931		emrD	b3673	0.37367	0.96163		emrD	b3673	-1.80495	0.40492			emrD	b3673	0.534836	0.925946		emrD	b3673	2.91481	0.0226195		emrD	b3673	-2.68771	0.569161
emrE	b0543	2.15465	NA		emrE	b0543	2.34162	NA		emrE	b0543	-0.451784	NA			emrE	b0543	1.8576	0.598134		emrE	b0543	-0.121815	0.982147		emrE	b0543	-0.707819	NA			emrE	b0543	1.18645	0.830194		emrE	b0543	3.3609	NA		emrE	b0543	-0.461189	0.989937
emrK	b2368	0.809126	NA		emrK	b2368	-0.334394	NA		emrK	b2368	0.177008	NA			emrK	b2368	1.323	NA		emrK	b2368	-0.958765	NA		emrK	b2368	-0.561852	NA			emrK	b2368	1.51877	0.811354		emrK	b2368	-0.572195	NA		emrK	b2368	-0.121561	NA
emrY	b2367	0.781652	NA		emrY	b2367	2.82996	NA		emrY	b2367	-0.877574	NA			emrY	b2367	2.9854	NA		emrY	b2367	-0.810687	NA		emrY	b2367	-1.32279	NA			emrY	b2367	-0.502694	NA		emrY	b2367	-0.024342	NA		emrY	b2367	-1.69089	NA
emtA	b1193	0.178288	0.95818		emtA	b1193	0.162661	0.924132		emtA	b1193	-0.188079	0.972462			emtA	b1193	0.426695	0.69947		emtA	b1193	-0.44091	0.864572		emtA	b1193	0.0129095	0.992056			emtA	b1193	0.671525	0.620251		emtA	b1193	-0.280461	0.801969		emtA	b1193	-0.129516	0.990197
endA	b2945	0.46629	0.956573		endA	b2945	-0.571716	0.877441		endA	b2945	0.335997	0.9778			endA	b2945	1.25108	0.574032		endA	b2945	-1.79528	0.561002		endA	b2945	-0.791263	0.786339			endA	b2945	0.973207	0.763842		endA	b2945	-1.2259	0.55654		endA	b2945	0.062711	0.991522
eno	b2779	-0.102604	0.973724		eno	b2779	0.377078	0.752507		eno	b2779	0.249334	0.970424			eno	b2779	-0.395401	0.736717		eno	b2779	0.137177	0.968911		eno	b2779	0.0619615	0.958344			eno	b2779	-0.14751	0.973152		eno	b2779	0.838221	0.277269		eno	b2779	0.617832	0.983105
entA	b0596	-0.292993	0.932689		entA	b0596	-0.470902	0.692638		entA	b0596	-0.300495	0.964489			entA	b0596	-1.24688	0.0916167		entA	b0596	0.683263	0.713195		entA	b0596	-0.102095	0.938393			entA	b0596	-0.600987	0.722141		entA	b0596	-0.903887	0.26245		entA	b0596	-1.11961	0.770113
entB	b0595	-0.0498381	0.985463		entB	b0595	-0.506648	0.70929		entB	b0595	0.64241	0.841781			entB	b0595	-1.43009	0.0830975		entB	b0595	1.01391	0.527374		entB	b0595	0.850303	0.451996			entB	b0595	-0.756694	0.679941		entB	b0595	-1.03196	0.25276		entB	b0595	-0.522325	0.986829
entC	b0593	0.000263097	0.999899		entC	b0593	-0.58808	0.717374		entC	b0593	-0.102012	0.988459			entC	b0593	-1.14493	0.369025		entC	b0593	1.11269	0.575435		entC	b0593	-0.605737	0.690416			entC	b0593	-0.285906	0.948197		entC	b0593	-0.325805	0.851573		entC	b0593	-0.878673	0.983105
entD	b0583	0.925914	0.82581		entD	b0583	-0.544439	0.830825		entD	b0583	-0.85683	0.913853			entD	b0583	0.549013	0.813211		entD	b0583	0.960988	0.830025		entD	b0583	0.596187	0.840507			entD	b0583	0.0325094	0.995537		entD	b0583	-0.0102886	0.994702		entD	b0583	-1.70888	0.973857
entE	b0594	-0.0898907	0.978968		entE	b0594	-0.74281	0.573014		entE	b0594	-0.0519081	0.99551			entE	b0594	-1.22486	0.265231		entE	b0594	0.901932	0.691829		entE	b0594	0.402658	0.79074			entE	b0594	-0.610464	0.807278		entE	b0594	-0.722203	0.552697		entE	b0594	-0.568189	0.986829
entF	b0586	0.484422	0.832032		entF	b0586	-0.0773253	0.967831		entF	b0586	0.785601	0.652492			entF	b0586	-0.49154	0.655467		entF	b0586	1.07796	0.338144		entF	b0586	1.21461	0.176383			entF	b0586	-0.209406	0.947008		entF	b0586	-0.422257	0.696195		entF	b0586	-0.50092	0.984035
entH	b0597	-0.346521	0.926685		entH	b0597	-0.110408	0.965898		entH	b0597	0.656885	0.851284			entH	b0597	-1.34596	0.118263		entH	b0597	1.66196	0.104059		entH	b0597	1.09551	0.381132			entH	b0597	-0.827143	0.612176		entH	b0597	-0.566978	0.6431		entH	b0597	-0.584261	0.984035
entS	b0591	-0.386573	0.906545		entS	b0591	-0.0962032	0.965898		entS	b0591	-0.368885	0.957842			entS	b0591	-0.683735	0.549697		entS	b0591	0.402663	0.91019		entS	b0591	-0.738737	0.538619			entS	b0591	-0.685366	0.704279		entS	b0591	0.472469	0.677276		entS	b0591	-0.571702	0.984035
envC	b3613	-0.364894	0.879699		envC	b3613	-0.225179	0.873197		envC	b3613	-0.542901	0.838841			envC	b3613	-0.752218	0.362238		envC	b3613	0.00265509	0.998054		envC	b3613	-0.321323	0.786339			envC	b3613	-0.49132	0.759774		envC	b3613	-0.0333282	0.975887		envC	b3613	-0.416056	0.986829
envY	b0566	-1.22059	NA		envY	b0566	-0.00414425	NA		envY	b0566	0.298901	NA			envY	b0566	0.24528	NA		envY	b0566	-1.16579	NA		envY	b0566	1.37628	NA			envY	b0566	-1.39331	0.827846		envY	b0566	-1.57229	NA		envY	b0566	2.0385	0.973857
envZ	b3404	-0.220848	0.946716		envZ	b3404	-0.384717	0.706855		envZ	b3404	0.0559047	0.99084			envZ	b3404	-0.203719	0.855551		envZ	b3404	-1.08306	0.143025		envZ	b3404	-0.96847	0.200178			envZ	b3404	-0.664981	0.511227		envZ	b3404	-0.176532	0.87951		envZ	b3404	-0.0381614	0.990197
epd	b2927	0.183146	0.9509		epd	b2927	-0.696622	0.22925		epd	b2927	-0.441218	0.791249			epd	b2927	0.447512	0.562389		epd	b2927	-0.148499	0.96163		epd	b2927	0.551434	0.421566			epd	b2927	0.233829	0.901788		epd	b2927	0.456455	0.496213		epd	b2927	0.20782	0.986829
epmA	b4155	-0.357805	0.932689		epmA	b4155	0.495143	0.717374		epmA	b4155	-0.223101	0.972462			epmA	b4155	-0.295669	0.85432		epmA	b4155	-0.546102	0.856524		epmA	b4155	-0.054276	0.971241			epmA	b4155	-0.428645	0.884106		epmA	b4155	1.35625	0.0922895		epmA	b4155	-0.105177	0.990197
epmB	b4146	0.417978	0.871318		epmB	b4146	-0.314672	0.826952		epmB	b4146	-0.105847	0.984816			epmB	b4146	-0.00561677	0.997608		epmB	b4146	0.187064	0.964234		epmB	b4146	-0.854722	0.456333			epmB	b4146	0.152914	0.969807		epmB	b4146	-0.0967038	0.940029		epmB	b4146	-0.658878	0.984035
epmC	b2326	-0.830959	0.870971		epmC	b2326	0.111224	0.981902		epmC	b2326	0.191989	0.984816			epmC	b2326	-1.93692	0.244768		epmC	b2326	-1.80667	0.494571		epmC	b2326	-1.11459	0.601638			epmC	b2326	-1.29902	0.679087		epmC	b2326	0.0981553	0.970047		epmC	b2326	0.105158	0.990197
eptA	b4114	-0.271206	0.957396		eptA	b4114	-0.0140251	0.995113		eptA	b4114	0.992051	0.653495			eptA	b4114	1.09913	0.394092		eptA	b4114	-0.296084	0.957531		eptA	b4114	2.18168	0.0892737			eptA	b4114	0.164687	0.973152		eptA	b4114	-0.0749067	0.964537		eptA	b4114	1.04004	0.9763
eptB	b3546	-0.114576	0.974294		eptB	b3546	-0.346498	0.831533		eptB	b3546	-0.0802408	0.989896			eptB	b3546	0.31827	0.838099		eptB	b3546	-0.442484	0.903624		eptB	b3546	-0.109359	0.938317			eptB	b3546	0.376262	0.897595		eptB	b3546	0.652281	0.541755		eptB	b3546	-0.628274	0.984035
eptC	b3955	-0.411603	0.82116		eptC	b3955	-0.204693	0.870299		eptC	b3955	-0.664513	0.69444			eptC	b3955	-0.353731	0.701081		eptC	b3955	-0.412398	0.835231		eptC	b3955	-0.503383	0.621505			eptC	b3955	-0.0937939	0.973152		eptC	b3955	-0.227221	0.816526		eptC	b3955	-0.402642	0.986829
era	b2566	-0.0648299	0.975178		era	b2566	0.296755	0.784791		era	b2566	0.0768431	0.984816			era	b2566	-0.441686	0.612209		era	b2566	0.0219078	0.99033		era	b2566	-0.243628	0.808074			era	b2566	-0.239539	0.914188		era	b2566	0.587855	0.395816		era	b2566	0.42367	0.984035
erpA	b0156	0.098073	0.97305		erpA	b0156	1.07167	0.0265261		erpA	b0156	0.155083	0.972462			erpA	b0156	-0.129227	0.903209		erpA	b0156	0.413712	0.797238		erpA	b0156	-0.379139	0.662384			erpA	b0156	0.173598	0.943329		erpA	b0156	0.527506	0.385762		erpA	b0156	-0.341586	0.986829
essD	b0554	-2.45534	NA		essD	b0554	3.33267	NA		essD	b0554	-1.24048	NA			essD	b0554	1.67752	NA		essD	b0554	-0.346599	NA		essD	b0554	-0.40612	NA			essD	b0554	0.221376	NA		essD	b0554	-0.0768965	NA		essD	b0554	-0.337968	NA
essQ	b1556	2.03548	NA		essQ	b1556	2.04387	NA		essQ	b1556	-0.893726	NA			essQ	b1556	0.241468	NA		essQ	b1556	-0.104782	NA		essQ	b1556	-1.65979	NA			essQ	b1556	1.43445	NA		essQ	b1556	0.327855	NA		essQ	b1556	1.25819	NA
etk	b0981	0.472531	0.793617		etk	b0981	0.0804276	0.965799		etk	b0981	0.028877	0.996787			etk	b0981	0.301792	0.770966		etk	b0981	0.00280777	0.998054		etk	b0981	0.186009	0.871402			etk	b0981	0.727058	0.39201		etk	b0981	-0.0518981	0.962153		etk	b0981	-0.187186	0.989937
etp	b0982	1.56631	NA		etp	b0982	-2.76196	NA		etp	b0982	1.3059	NA			etp	b0982	0.51737	0.895774		etp	b0982	-1.67992	NA		etp	b0982	0.0757507	NA			etp	b0982	-0.516254	0.946075		etp	b0982	-2.20276	NA		etp	b0982	1.22603	0.984035
eutA	b2451	-0.0625062	0.985463		eutA	b2451	0.875308	0.502726		eutA	b2451	0.604517	0.912028			eutA	b2451	0.107486	0.955245		eutA	b2451	0.985037	0.64404		eutA	b2451	-0.433174	0.813872			eutA	b2451	-0.0938282	0.983058		eutA	b2451	0.991745	0.346611		eutA	b2451	0.935357	0.983105
eutB	b2441	-0.475522	0.793617		eutB	b2441	-0.0420908	0.983103		eutB	b2441	-0.155001	0.972462			eutB	b2441	-0.492529	0.588567		eutB	b2441	-0.0816228	0.977631		eutB	b2441	0.214843	0.839461			eutB	b2441	0.0037816	0.999278		eutB	b2441	-0.0921985	0.938999		eutB	b2441	0.094348	0.990197
eutC	b2440	-0.232062	0.967979		eutC	b2440	1.19298	0.329521		eutC	b2440	1.19097	0.599361			eutC	b2440	-0.732573	0.649906		eutC	b2440	0.58643	0.88464		eutC	b2440	0.54628	0.774587			eutC	b2440	-0.489456	0.890851		eutC	b2440	0.608632	0.658564		eutC	b2440	0.73096	0.984035
eutD	b2458	-1.55494	0.459639		eutD	b2458	-0.819568	0.745672		eutD	b2458	-0.373837	0.972462			eutD	b2458	-0.0916104	0.975855		eutD	b2458	-1.20675	0.748527		eutD	b2458	-0.00660654	0.997781			eutD	b2458	-0.40714	0.930294		eutD	b2458	-0.511992	0.835348		eutD	b2458	0.657853	0.986829
eutE	b2455	-2.55876	0.110384		eutE	b2455	0.0238036	0.994331		eutE	b2455	0.790599	0.937998			eutE	b2455	-0.6774	0.809616		eutE	b2455	1.08965	0.808318		eutE	b2455	0.947968	0.744035			eutE	b2455	-1.58211	0.505836		eutE	b2455	0.469374	0.840922		eutE	b2455	1.65746	0.9763
eutG	b2453	-1.70924	0.513108		eutG	b2453	-0.994978	0.681598		eutG	b2453	-0.397016	0.972653			eutG	b2453	-0.42278	0.883376		eutG	b2453	-0.567874	0.940372		eutG	b2453	-0.053465	0.986489			eutG	b2453	-1.03899	0.762396		eutG	b2453	-0.706613	0.766239		eutG	b2453	0.109264	0.990197
eutH	b2452	-0.0237835	0.997542		eutH	b2452	0.122446	0.964965		eutH	b2452	0.226106	0.972653			eutH	b2452	0.181657	0.909542		eutH	b2452	-0.00982169	0.99737		eutH	b2452	-0.889579	0.532489			eutH	b2452	-0.0129082	0.996275		eutH	b2452	0.153089	0.931489		eutH	b2452	0.680462	0.984035
eutJ	b2454	-0.873488	NA		eutJ	b2454	1.41059	NA		eutJ	b2454	-0.4029	NA			eutJ	b2454	1.07688	0.732789		eutJ	b2454	0.28269	NA		eutJ	b2454	0.995688	NA			eutJ	b2454	-0.182452	0.981489		eutJ	b2454	0.921711	NA		eutJ	b2454	-1.80967	0.984035
eutK	b2438	-0.288509	0.957396		eutK	b2438	0.11239	0.970433		eutK	b2438	-0.532267	0.958124			eutK	b2438	-0.188112	0.918305		eutK	b2438	-0.334862	0.953016		eutK	b2438	-0.822321	0.700059			eutK	b2438	-0.247356	0.955347		eutK	b2438	-0.406555	0.8151		eutK	b2438	-0.320228	0.989937
eutL	b2439	0.583072	0.918471		eutL	b2439	0.888689	0.654256		eutL	b2439	0.364681	0.972462			eutL	b2439	-0.171987	0.941541		eutL	b2439	-0.0308056	0.993469		eutL	b2439	0.0219894	0.992628			eutL	b2439	0.757363	0.802459		eutL	b2439	-0.0706729	0.970143		eutL	b2439	-0.0397832	0.993485
eutM	b2457	-1.20983	0.750989		eutM	b2457	-0.026954	0.996288		eutM	b2457	0.403653	0.972462			eutM	b2457	2.00077	0.447285		eutM	b2457	-2.47492	0.531912		eutM	b2457	0.738079	0.80003			eutM	b2457	0.440196	0.943329		eutM	b2457	-1.78967	0.503808		eutM	b2457	0.985025	0.986829
eutN	b2456	-1.95152	NA		eutN	b2456	0.668377	NA		eutN	b2456	0.353072	NA			eutN	b2456	-0.306562	NA		eutN	b2456	2.81448	NA		eutN	b2456	-2.17307	NA			eutN	b2456	-2.2537	NA		eutN	b2456	-0.344378	NA		eutN	b2456	0.494199	NA
eutP	b2461	-0.750892	NA		eutP	b2461	0.726256	NA		eutP	b2461	-1.65731	NA			eutP	b2461	0.848614	NA		eutP	b2461	1.17768	NA		eutP	b2461	0.995688	NA			eutP	b2461	-0.691591	0.916195		eutP	b2461	-0.328892	NA		eutP	b2461	-2.64123	0.9763
eutQ	b2460	-0.622595	NA		eutQ	b2460	1.03697	NA		eutQ	b2460	-1.38294	NA			eutQ	b2460	0.511561	0.869689		eutQ	b2460	-0.00971513	0.998054		eutQ	b2460	1.02397	NA			eutQ	b2460	-0.593454	0.91225		eutQ	b2460	-0.625144	NA		eutQ	b2460	-0.997566	0.986829
eutR	b2437	-0.364618	0.946716		eutR	b2437	-0.401575	0.817784		eutR	b2437	-0.589725	0.913318			eutR	b2437	-0.926524	0.440142		eutR	b2437	-0.354893	0.931415		eutR	b2437	1.02655	0.578376			eutR	b2437	-0.715741	0.722141		eutR	b2437	-0.119961	0.938999		eutR	b2437	0.197119	0.989937
eutS	b2462	-0.0107873	NA		eutS	b2462	-0.161804	NA		eutS	b2462	0.191054	NA			eutS	b2462	1.76729	NA		eutS	b2462	1.29444	NA		eutS	b2462	-0.0156689	NA			eutS	b2462	-1.16273	0.890851		eutS	b2462	0.616088	NA		eutS	b2462	0.296323	NA
eutT	b2459	-1.17644	0.657213		eutT	b2459	-0.462491	0.899827		eutT	b2459	-0.530676	0.972462			eutT	b2459	-0.458648	0.838099		eutT	b2459	-1.09565	0.832959		eutT	b2459	-0.588338	0.865038			eutT	b2459	-0.747548	0.806793		eutT	b2459	-0.881786	0.69557		eutT	b2459	-0.533625	0.989937
evgA	b2369	1.04209	0.431904		evgA	b2369	-1.14978	0.165568		evgA	b2369	-0.274562	0.970424			evgA	b2369	1.57815	0.0173543		evgA	b2369	-0.37434	0.918257		evgA	b2369	0.0136542	0.992524			evgA	b2369	0.951873	0.318498		evgA	b2369	-0.925053	0.273922		evgA	b2369	-0.430529	0.986829
evgS	b2370	0.527681	0.871318		evgS	b2370	-1.42071	0.142679		evgS	b2370	-0.171595	0.981107			evgS	b2370	0.291084	0.855818		evgS	b2370	-0.531319	0.900858		evgS	b2370	0.17073	0.920775			evgS	b2370	0.508723	0.838844		evgS	b2370	-1.13783	0.2559		evgS	b2370	0.479026	0.986829
exbB	b3006	-0.0084954	0.997717		exbB	b3006	-0.0165691	0.994331		exbB	b3006	-0.311504	0.957842			exbB	b3006	0.0740274	0.957952		exbB	b3006	0.599009	0.744762		exbB	b3006	0.299843	0.788562			exbB	b3006	0.370143	0.869601		exbB	b3006	0.83069	0.277844		exbB	b3006	-0.302033	0.986829
exbD	b3005	0.584054	0.793993		exbD	b3005	-0.250099	0.881915		exbD	b3005	0.172323	0.972653			exbD	b3005	-0.636743	0.574329		exbD	b3005	0.507205	0.857282		exbD	b3005	0.708231	0.497734			exbD	b3005	0.12083	0.973152		exbD	b3005	0.756719	0.408757		exbD	b3005	-0.0398244	0.990561
exoD		2.14671	NA		exoD		1.4378	NA		exoD		0.0586053	NA			exoD		-1.27521	NA		exoD		-0.797173	NA		exoD		0.133757	NA			exoD		-1.11641	NA		exoD		-0.427266	NA		exoD		-0.602474	NA
exoX	b1844	0.418557	0.793617		exoX	b1844	-0.381835	0.641107		exoX	b1844	-0.305951	0.913481			exoX	b1844	0.252725	0.789908		exoX	b1844	-0.203711	0.937985		exoX	b1844	0.347709	0.698326			exoX	b1844	0.534846	0.583739		exoX	b1844	-0.706439	0.196735		exoX	b1844	0.187881	0.989491
exuR	b3094	-0.244157	0.939493		exuR	b3094	0.85148	0.172404		exuR	b3094	0.630364	0.657296			exuR	b3094	-0.521048	0.557076		exuR	b3094	0.245989	0.928231		exuR	b3094	0.362138	0.724039			exuR	b3094	0.191588	0.943329		exuR	b3094	0.985407	0.0662023		exuR	b3094	0.190665	0.989851
exuT	b3093	-0.184657	0.96293		exuT	b3093	0.571653	0.605205		exuT	b3093	0.226555	0.972265			exuT	b3093	0.411046	0.776271		exuT	b3093	0.143179	0.97084		exuT	b3093	-1.00962	0.264832			exuT	b3093	0.109678	0.974961		exuT	b3093	0.317266	0.795772		exuT	b3093	0.452412	0.986829
eyeA	b4690	-0.184586	NA		eyeA	b4690	0.077349	NA		eyeA	b4690	0.162021	NA			eyeA	b4690	-0.312146	0.902564		eyeA	b4690	-0.034723	0.993469		eyeA	b4690	-1.1228	NA			eyeA	b4690	0.402284	0.943329		eyeA	b4690	0.498285	NA		eyeA	b4690	0.474029	0.989937
fabA	b0954	-0.379947	0.871318		fabA	b0954	0.4714	0.643489		fabA	b0954	-0.204877	0.970424			fabA	b0954	-0.327019	0.786145		fabA	b0954	-0.41104	0.869908		fabA	b0954	-0.146236	0.89504			fabA	b0954	-0.571919	0.716908		fabA	b0954	0.269858	0.808439		fabA	b0954	-0.00383308	0.997867
fabB	b2323	-0.631488	0.611378		fabB	b2323	-0.184125	0.886553		fabB	b2323	-0.146444	0.972462			fabB	b2323	-0.682038	0.376067		fabB	b2323	0.109297	0.971858		fabB	b2323	0.0416831	0.966519			fabB	b2323	-0.321992	0.862729		fabB	b2323	-0.146441	0.894748		fabB	b2323	-0.0791753	0.990197
fabD	b1092	-0.221343	0.952141		fabD	b1092	-0.269874	0.840146		fabD	b1092	-0.28009	0.957842			fabD	b1092	-0.539455	0.578649		fabD	b1092	-0.548243	0.75893		fabD	b1092	-0.157071	0.881906			fabD	b1092	-0.313337	0.892491		fabD	b1092	0.156762	0.898467		fabD	b1092	0.24979	0.986829
fabF	b1095	-0.00293849	0.999441		fabF	b1095	-0.121618	0.935398		fabF	b1095	-0.10795	0.980094			fabF	b1095	-0.214418	0.842037		fabF	b1095	-0.519755	0.713195		fabF	b1095	-0.326407	0.709629			fabF	b1095	-0.224394	0.918262		fabF	b1095	0.63129	0.334243		fabF	b1095	0.189233	0.989491
fabG	b1093	0.00515931	0.998341		fabG	b1093	-0.37045	0.676849		fabG	b1093	-0.0825214	0.98124			fabG	b1093	-0.208545	0.844194		fabG	b1093	-0.729276	0.476187		fabG	b1093	0.0278112	0.975236			fabG	b1093	-0.274896	0.890851		fabG	b1093	0.630318	0.322625		fabG	b1093	0.140552	0.989937
fabH	b1091	-0.496564	0.719624		fabH	b1091	0.709587	0.263864		fabH	b1091	0.0886536	0.981107			fabH	b1091	-1.31612	0.00526179		fabH	b1091	-0.121062	0.965947		fabH	b1091	-0.271674	0.765213			fabH	b1091	-0.730127	0.37953		fabH	b1091	0.498955	0.479969		fabH	b1091	0.253587	0.986829
fabI	b1288	0.117138	0.967979		fabI	b1288	-0.115818	0.939433		fabI	b1288	-0.303603	0.933708			fabI	b1288	-0.0913072	0.939119		fabI	b1288	-0.00989828	0.995276		fabI	b1288	-0.59966	0.430972			fabI	b1288	0.109813	0.973152		fabI	b1288	-0.263523	0.782146		fabI	b1288	-0.427356	0.984035
fabR	b3963	0.717436	0.654695		fabR	b3963	-0.360732	0.784619		fabR	b3963	-0.388037	0.941427			fabR	b3963	0.222401	0.864524		fabR	b3963	-0.0658851	0.978051		fabR	b3963	-0.455217	0.724362			fabR	b3963	0.666325	0.647959		fabR	b3963	0.0233638	0.983346		fabR	b3963	-0.883324	0.971465
fabZ	b0180	-0.0842266	0.974994		fabZ	b0180	0.2077	0.898677		fabZ	b0180	-0.506738	0.883877			fabZ	b0180	0.577873	0.606579		fabZ	b0180	-0.333366	0.921622		fabZ	b0180	0.0731225	0.955772			fabZ	b0180	0.115233	0.973152		fabZ	b0180	0.395542	0.72629		fabZ	b0180	-0.222946	0.989937
fadA	b3845	-0.382632	0.952141		fadA	b3845	1.2178	0.343171		fadA	b3845	1.75393	0.175292			fadA	b3845	0.438541	0.837882		fadA	b3845	0.755045	0.839957		fadA	b3845	-0.970305	0.501206			fadA	b3845	-0.76206	0.800162		fadA	b3845	1.57625	0.155743		fadA	b3845	1.07905	0.9763
fadB	b3846	-0.77634	0.930041		fadB	b3846	2.79002	0.154921		fadB	b3846	2.93148	0.183363			fadB	b3846	-0.267345	0.944209		fadB	b3846	0.139095	0.982147		fadB	b3846	-1.19079	0.651531			fadB	b3846	-2.00284	0.563466		fadB	b3846	2.84274	0.127101		fadB	b3846	1.61945	0.983105
fadD	b1805	-0.297012	0.957396		fadD	b1805	1.36398	0.235732		fadD	b1805	1.72216	0.131237			fadD	b1805	-0.475399	0.808857		fadD	b1805	-0.328544	0.953015		fadD	b1805	-0.501895	0.755092			fadD	b1805	-0.94627	0.689208		fadD	b1805	1.31799	0.228477		fadD	b1805	0.530158	0.986829
fadE	b0221	-0.25728	0.969047		fadE	b0221	2.79459	0.0139745		fadE	b0221	2.80601	0.0176582			fadE	b0221	0.529536	0.834316		fadE	b0221	0.134907	0.978051		fadE	b0221	-1.69933	0.258323			fadE	b0221	-1.29209	0.655345		fadE	b0221	2.46212	0.0419795		fadE	b0221	1.78409	0.82278
fadH	b3081	-1.65282	0.577446		fadH	b3081	2.002	0.211247		fadH	b3081	1.31048	0.742592			fadH	b3081	-0.23067	0.941541		fadH	b3081	-0.476764	0.951056		fadH	b3081	-1.69163	0.321293			fadH	b3081	-1.96494	0.362524		fadH	b3081	2.89755	0.0285897		fadH	b3081	0.548575	0.986829
fadI	b2342	-0.441577	0.9509		fadI	b2342	2.33433	0.0347321		fadI	b2342	2.02594	0.11445			fadI	b2342	0.464514	0.846512		fadI	b2342	-0.0622907	0.985837		fadI	b2342	-0.224515	0.907191			fadI	b2342	-1.36798	0.513369		fadI	b2342	1.43424	0.262966		fadI	b2342	1.0368	0.983105
fadJ	b2341	-0.67245	0.870971		fadJ	b2341	1.75044	0.13879		fadJ	b2341	2.12944	0.0562452			fadJ	b2341	0.285435	0.895774		fadJ	b2341	0.284871	0.964701		fadJ	b2341	-0.224302	0.902832			fadJ	b2341	-1.37664	0.441054		fadJ	b2341	1.47618	0.216677		fadJ	b2341	0.827125	0.984035
fadK	b1701	0.0934957	0.984662		fadK	b1701	-0.265263	0.927642		fadK	b1701	-0.155617	0.985298			fadK	b1701	-0.00235668	0.99934		fadK	b1701	-0.437354	0.937985		fadK	b1701	-0.643777	0.762358			fadK	b1701	0.447847	0.905836		fadK	b1701	-1.53935	0.169198		fadK	b1701	-0.206525	0.990197
fadL	b2344	-0.421321	0.946716		fadL	b2344	1.41712	0.277174		fadL	b2344	2.13621	0.0625305			fadL	b2344	-0.142467	0.952238		fadL	b2344	0.108412	0.978051		fadL	b2344	-0.218342	0.907191			fadL	b2344	-1.09947	0.665007		fadL	b2344	1.54544	0.198984		fadL	b2344	0.709237	0.984035
fadM	b0443	0.338276	0.957396		fadM	b0443	1.18719	0.412443		fadM	b0443	1.02404	0.75429			fadM	b0443	0.468083	0.838099		fadM	b0443	-0.512909	0.92008		fadM	b0443	-1.21575	0.395548			fadM	b0443	0.26856	0.969807		fadM	b0443	0.37312	0.851862		fadM	b0443	0.83388	0.984035
fadR	b1187	0.310608	0.932689		fadR	b1187	0.0254886	0.990179		fadR	b1187	-0.465015	0.903221			fadR	b1187	0.634848	0.564244		fadR	b1187	-0.290384	0.937985		fadR	b1187	-0.647302	0.557433			fadR	b1187	0.842996	0.502192		fadR	b1187	0.122674	0.933885		fadR	b1187	-0.190267	0.989937
fau	b2912	0.523507	0.885476		fau	b2912	-0.67237	0.563311		fau	b2912	-1.13681	0.629864			fau	b2912	0.400097	0.802057		fau	b2912	-0.490469	0.88464		fau	b2912	-1.77765	0.141381			fau	b2912	0.589499	0.778548		fau	b2912	0.237946	0.873952		fau	b2912	-0.714302	0.984035
fbaA	b2925	0.311952	0.870971		fbaA	b2925	-0.0435377	0.977674		fbaA	b2925	0.0354381	0.991827			fbaA	b2925	-0.342474	0.681145		fbaA	b2925	0.524988	0.684071		fbaA	b2925	0.298938	0.709629			fbaA	b2925	0.0316617	0.99094		fbaA	b2925	0.135408	0.892017		fbaA	b2925	0.275248	0.986829
fbaB	b2097	0.175631	0.957396		fbaB	b2097	-1.10361	0.103607		fbaB	b2097	-0.380264	0.909604			fbaB	b2097	0.891853	0.282926		fbaB	b2097	0.355518	0.905198		fbaB	b2097	1.42052	0.0289942			fbaB	b2097	0.385509	0.856228		fbaB	b2097	-0.491496	0.59939		fbaB	b2097	-0.0777402	0.990197
fbp	b4232	-0.430917	0.810131		fbp	b4232	-0.82315	0.212651		fbp	b4232	-0.279777	0.957842			fbp	b4232	-0.339964	0.729419		fbp	b4232	0.340108	0.900858		fbp	b4232	-0.28753	0.775808			fbp	b4232	-0.453347	0.760649		fbp	b4232	-0.831455	0.18098		fbp	b4232	-0.157735	0.989937
fdhD	b3895	-0.221397	0.957396		fdhD	b3895	0.986491	0.271298		fdhD	b3895	0.934106	0.596755			fdhD	b3895	0.0275826	0.986265		fdhD	b3895	-0.0187951	0.993469		fdhD	b3895	-0.790941	0.484761			fdhD	b3895	-0.0593474	0.988008		fdhD	b3895	0.308603	0.801969		fdhD	b3895	0.514256	0.986829
fdhE	b3891	-0.124612	0.96293		fdhE	b3891	-0.986462	0.0543893		fdhE	b3891	-0.989595	0.16391			fdhE	b3891	-0.271692	0.776271		fdhE	b3891	-0.0951733	0.971858		fdhE	b3891	-0.430112	0.636347			fdhE	b3891	-0.427555	0.730876		fdhE	b3891	-0.337388	0.670174		fdhE	b3891	-0.473775	0.984035
fdhF	b4079	0.183172	0.973724		fdhF	b4079	0.770879	0.682346		fdhF	b4079	0.542293	0.955278			fdhF	b4079	0.986462	0.578483		fdhF	b4079	0.261347	0.965947		fdhF	b4079	0.649211	0.725879			fdhF	b4079	0.72292	0.833934		fdhF	b4079	1.11338	0.442302		fdhF	b4079	1.26164	0.9763
fdnG	b1474	-0.271674	0.966999		fdnG	b1474	0.526544	0.840146		fdnG	b1474	-0.104947	0.991827			fdnG	b1474	0.224294	0.933714		fdnG	b1474	-2.39629	0.0664553		fdnG	b1474	-2.45385	0.0819081			fdnG	b1474	-0.262769	0.973152		fdnG	b1474	0.404957	0.856705		fdnG	b1474	0.795407	0.986829
fdnH	b1475	-0.477869	0.9509		fdnH	b1475	-0.0572017	0.98732		fdnH	b1475	-1.24364	0.851284			fdnH	b1475	0.106038	0.972689		fdnH	b1475	-1.3465	0.684071		fdnH	b1475	-2.86402	0.100591			fdnH	b1475	0.395341	0.943802		fdnH	b1475	-0.15989	0.95194		fdnH	b1475	-0.126956	0.990197
fdnI	b1476	-0.404933	0.936378		fdnI	b1476	0.173136	0.951476		fdnI	b1476	-0.0395341	0.996787			fdnI	b1476	0.235653	0.904089		fdnI	b1476	-0.67305	0.842314		fdnI	b1476	-0.271942	0.87401			fdnI	b1476	0.502287	0.879529		fdnI	b1476	1.06153	0.347404		fdnI	b1476	0.794641	0.984035
fdoG	b3894	-1.10203	0.459639		fdoG	b3894	-0.836604	0.415762		fdoG	b3894	-0.520229	0.897309			fdoG	b3894	-0.122137	0.943698		fdoG	b3894	0.433221	0.905198		fdoG	b3894	-0.555661	0.636275			fdoG	b3894	-0.614259	0.771566		fdoG	b3894	0.112855	0.940029		fdoG	b3894	0.519519	0.984035
fdoH	b3893	-0.70831	0.676073		fdoH	b3893	-1.17793	0.124726		fdoH	b3893	-0.874184	0.573438			fdoH	b3893	0.169492	0.905451		fdoH	b3893	-0.152919	0.967088		fdoH	b3893	-0.540656	0.613658			fdoH	b3893	-0.527731	0.79302		fdoH	b3893	-0.131961	0.931489		fdoH	b3893	0.631939	0.983105
fdoI	b3892	-1.02735	0.274164		fdoI	b3892	-0.84265	0.262604		fdoI	b3892	-0.395542	0.903221			fdoI	b3892	-0.524057	0.596212		fdoI	b3892	-0.218617	0.952943		fdoI	b3892	0.0297509	0.98056			fdoI	b3892	-0.841121	0.392649		fdoI	b3892	-0.408568	0.672225		fdoI	b3892	0.223102	0.989491
fdrA	b0518	-0.574861	NA		fdrA	b0518	-0.502341	NA		fdrA	b0518	-0.331197	NA			fdrA	b0518	-1.38806	NA		fdrA	b0518	-0.46699	NA		fdrA	b0518	0.601731	NA			fdrA	b0518	-1.78018	0.722141		fdrA	b0518	-0.584591	NA		fdrA	b0518	0.892811	0.986829
fdx	b2525	-0.0128628	0.997717		fdx	b2525	0.504603	0.76542		fdx	b2525	1.69821	0.0998437			fdx	b2525	-1.22551	0.292345		fdx	b2525	-0.256591	0.96163		fdx	b2525	0.0599848	0.97088			fdx	b2525	-0.341933	0.930294		fdx	b2525	0.698549	0.597438		fdx	b2525	-0.165471	0.989937
feaB	b1385	-0.549472	0.793993		feaB	b1385	0.393987	0.784791		feaB	b1385	-0.931175	0.604398			feaB	b1385	-0.331862	0.806602		feaB	b1385	-0.0346343	0.985954		feaB	b1385	-0.58701	0.652715			feaB	b1385	-0.698527	0.637677		feaB	b1385	-0.26535	0.838614		feaB	b1385	-0.54876	0.984035
feaR	b1384	0.869007	0.6383		feaR	b1384	2.03448	0.00494249		feaR	b1384	2.62467	5.10928e-05			feaR	b1384	1.93027	0.0104755		feaR	b1384	0.0967836	0.978051		feaR	b1384	1.65075	0.0892737			feaR	b1384	0.418754	0.862729		feaR	b1384	-0.46984	0.665284		feaR	b1384	-0.0474147	0.990197
fecA	b4291	-0.219532	0.957396		fecA	b4291	-0.650537	0.516912		fecA	b4291	-0.991633	0.693566			fecA	b4291	-0.846948	0.340591		fecA	b4291	0.316904	0.929668		fecA	b4291	-0.971464	0.498933			fecA	b4291	-0.0886175	0.97697		fecA	b4291	0.303342	0.802648		fecA	b4291	-1.1144	0.973857
fecB	b4290	-0.528437	0.870971		fecB	b4290	-1.13101	0.314493		fecB	b4290	-1.26964	0.711635			fecB	b4290	-0.16243	0.928311		fecB	b4290	-0.316297	0.953016		fecB	b4290	-1.09679	0.57205			fecB	b4290	0.249349	0.948268		fecB	b4290	-0.147381	0.938999		fecB	b4290	-0.66676	0.986829
fecC	b4289	-0.674931	0.900288		fecC	b4289	-0.0079199	0.997477		fecC	b4289	-0.0241822	0.996787			fecC	b4289	-0.861276	0.661938		fecC	b4289	0.610069	0.92008		fecC	b4289	-1.01411	0.675508			fecC	b4289	-0.380091	0.94345		fecC	b4289	0.722611	0.713701		fecC	b4289	0.154811	0.990197
fecD	b4288	-0.15133	0.974294		fecD	b4288	-1.01747	0.5892		fecD	b4288	-0.00748168	0.998942			fecD	b4288	-0.854874	0.611211		fecD	b4288	-0.654959	0.910041		fecD	b4288	-0.658194	0.766523			fecD	b4288	0.0241745	0.996275		fecD	b4288	-0.430295	0.843738		fecD	b4288	-0.0768447	0.990197
fecE	b4287	-0.011054	0.998508		fecE	b4287	0.0763544	0.986966		fecE	b4287	1.18357	0.787586			fecE	b4287	0.672768	0.765668		fecE	b4287	-0.155149	0.978051		fecE	b4287	0.565378	0.818158			fecE	b4287	0.498001	0.913753		fecE	b4287	-0.128009	0.960903		fecE	b4287	0.762056	0.986829
fecI	b4293	-0.167922	0.957396		fecI	b4293	-0.395294	0.68482		fecI	b4293	0.531371	0.801719			fecI	b4293	-0.200567	0.851284		fecI	b4293	0.811308	0.476187		fecI	b4293	0.889796	0.298449			fecI	b4293	0.181808	0.943329		fecI	b4293	0.820968	0.201517		fecI	b4293	0.165841	0.989937
fecR	b4292	0.0221354	0.997114		fecR	b4292	-0.583635	0.644044		fecR	b4292	0.0369821	0.996787			fecR	b4292	-0.342098	0.808747		fecR	b4292	0.986251	0.557289		fecR	b4292	0.357598	0.838489			fecR	b4292	0.134421	0.973152		fecR	b4292	0.741886	0.471495		fecR	b4292	-0.329988	0.989491
feoA	b3408	0.0332996	0.997717		feoA	b3408	0.0598387	0.98732		feoA	b3408	-0.441585	0.970424			feoA	b3408	-0.496329	0.855646		feoA	b3408	-0.54266	0.937985		feoA	b3408	-1.39464	0.473658			feoA	b3408	0.44914	0.943329		feoA	b3408	1.31503	0.441084		feoA	b3408	0.41827	0.989937
feoB	b3409	-0.397072	0.956467		feoB	b3409	-0.642108	0.763484		feoB	b3409	-1.28563	0.629864			feoB	b3409	-0.672488	0.748131		feoB	b3409	-0.866516	0.832959		feoB	b3409	-2.04151	0.114337			feoB	b3409	-0.0776964	0.990299		feoB	b3409	0.770434	0.665284		feoB	b3409	-0.0219925	0.995884
feoC	b3410	-0.321303	0.961729		feoC	b3410	0.760703	0.723015		feoC	b3410	0.664407	0.910394			feoC	b3410	-1.6151	0.257946		feoC	b3410	-0.673246	0.896451		feoC	b3410	0.274423	0.897407			feoC	b3410	-0.786297	0.81083		feoC	b3410	0.865828	0.604382		feoC	b3410	1.40317	0.959079
fepA	b0584	-0.16851	0.963401		fepA	b0584	0.18117	0.923721		fepA	b0584	-0.169318	0.972653			fepA	b0584	-0.9812	0.301685		fepA	b0584	1.55293	0.0438905		fepA	b0584	0.75086	0.465228			fepA	b0584	-0.51547	0.806793		fepA	b0584	0.377521	0.756169		fepA	b0584	-1.04757	0.82278
fepB	b0592	0.0679469	0.975178		fepB	b0592	-0.495961	0.595422		fepB	b0592	-0.42858	0.902741			fepB	b0592	-0.386316	0.69652		fepB	b0592	0.973395	0.294658		fepB	b0592	0.322614	0.787906			fepB	b0592	0.0224515	0.994672		fepB	b0592	0.0598409	0.961072		fepB	b0592	-0.639253	0.982285
fepC	b0588	-0.298205	0.957396		fepC	b0588	-1.28469	0.487682		fepC	b0588	-1.06937	0.889147			fepC	b0588	-0.550375	0.789908		fepC	b0588	0.808199	0.903624		fepC	b0588	0.921709	0.771874			fepC	b0588	-0.745743	0.809774		fepC	b0588	-0.536126	0.819288		fepC	b0588	-0.0785481	0.990946
fepD	b0590	-0.10708	0.97305		fepD	b0590	-0.872254	0.201116		fepD	b0590	-0.897938	0.538482			fepD	b0590	-0.525335	0.548916		fepD	b0590	0.602075	0.708564		fepD	b0590	-0.211468	0.874801			fepD	b0590	-0.0546118	0.985559		fepD	b0590	0.0335097	0.975022		fepD	b0590	-0.26054	0.989491
fepE	b0587	-1.18275	NA		fepE	b0587	-0.131186	NA		fepE	b0587	0.416358	NA			fepE	b0587	-0.35602	NA		fepE	b0587	0.367417	NA		fepE	b0587	1.03044	NA			fepE	b0587	1.07184	0.841207		fepE	b0587	0.928544	NA		fepE	b0587	1.38673	0.986829
fepG	b0589	0.179736	0.969047		fepG	b0589	-1.46699	0.201116		fepG	b0589	-0.355582	0.972462			fepG	b0589	-0.297446	0.855646		fepG	b0589	0.210893	0.97084		fepG	b0589	0.423683	0.854294			fepG	b0589	-0.24913	0.949059		fepG	b0589	-0.715499	0.630168		fepG	b0589	-0.318914	0.989937
fes	b0585	0.492712	0.848761		fes	b0585	0.471768	0.735793		fes	b0585	0.822792	0.701142			fes	b0585	-0.340656	0.813211		fes	b0585	1.04374	0.503783		fes	b0585	1.80892	0.0763381			fes	b0585	0.00550206	0.999278		fes	b0585	-0.341665	0.801633		fes	b0585	-0.621355	0.984035
fetA	b0490	0.458187	0.936378		fetA	b0490	-0.430182	0.840946		fetA	b0490	-1.05355	0.894723			fetA	b0490	0.8325	0.608699		fetA	b0490	-0.322563	0.957033		fetA	b0490	-0.854895	0.75845			fetA	b0490	0.524096	0.86689		fetA	b0490	-0.361236	0.838614		fetA	b0490	-1.21094	0.984035
fetB	b0491	-0.485147	0.906545		fetB	b0491	-0.720327	0.623986		fetB	b0491	-0.298772	0.972462			fetB	b0491	0.562151	0.741743		fetB	b0491	-0.965195	0.669392		fetB	b0491	0.336825	0.870754			fetB	b0491	0.426319	0.896146		fetB	b0491	-0.975274	0.369944		fetB	b0491	-0.508251	0.986829
ffh	b2610	0.00658387	0.997717		ffh	b2610	-0.554188	0.416892		ffh	b2610	-0.429546	0.82831			ffh	b2610	-0.50112	0.527044		ffh	b2610	0.0932764	0.971858		ffh	b2610	-0.1303	0.88604			ffh	b2610	0.221136	0.915197		ffh	b2610	0.595695	0.342787		ffh	b2610	0.0307976	0.990561
ffs	b0455	1.73258	0.668017		ffs	b0455	-0.58173	0.883321		ffs	b0455	5.34643	0.000102184			ffs	b0455	4.24452	0.00579518		ffs	b0455	2.00048	0.579215		ffs	b0455	1.78703	0.429755			ffs	b0455	2.04696	0.508594		ffs	b0455	1.55439	0.503566		ffs	b0455	1.35649	0.984035
fhlA	b2731	0.00682824	0.997717		fhlA	b2731	-0.843264	0.277174		fhlA	b2731	0.585847	0.785179			fhlA	b2731	0.549565	0.557076		fhlA	b2731	-0.489162	0.835444		fhlA	b2731	0.547815	0.591536			fhlA	b2731	0.241608	0.915368		fhlA	b2731	-0.689109	0.381168		fhlA	b2731	0.862808	0.888352
fhuA	b0150	0.145221	0.952141		fhuA	b0150	-0.383427	0.515379		fhuA	b0150	0.56159	0.46736			fhuA	b0150	0.176025	0.827058		fhuA	b0150	0.314693	0.830025		fhuA	b0150	0.982159	0.0248216			fhuA	b0150	0.33526	0.751252		fhuA	b0150	-0.12039	0.882238		fhuA	b0150	0.160426	0.986829
fhuB	b0153	-0.758188	0.549311		fhuB	b0153	-0.210853	0.892952		fhuB	b0153	-0.028806	0.996787			fhuB	b0153	-0.673145	0.444524		fhuB	b0153	0.0325637	0.985954		fhuB	b0153	0.144705	0.918979			fhuB	b0153	-0.757295	0.462473		fhuB	b0153	-0.181572	0.886049		fhuB	b0153	-0.367344	0.986829
fhuC	b0151	-0.411341	0.832032		fhuC	b0151	0.49411	0.644044		fhuC	b0151	0.736704	0.675398			fhuC	b0151	-1.04113	0.0952231		fhuC	b0151	0.123767	0.971858		fhuC	b0151	0.978602	0.333523			fhuC	b0151	-0.638649	0.572524		fhuC	b0151	-0.00570481	0.994212		fhuC	b0151	-0.131781	0.989937
fhuD	b0152	0.281773	0.946716		fhuD	b0152	-0.811843	0.43863		fhuD	b0152	0.103171	0.988459			fhuD	b0152	-0.0821673	0.95498		fhuD	b0152	-0.410159	0.916205		fhuD	b0152	-0.279149	0.871096			fhuD	b0152	0.0930196	0.975801		fhuD	b0152	-0.5879	0.598625		fhuD	b0152	-0.572866	0.986829
fhuE	b1102	0.0997183	0.973724		fhuE	b1102	0.0287547	0.986988		fhuE	b1102	0.324759	0.941427			fhuE	b1102	-0.11172	0.931261		fhuE	b1102	0.569201	0.744762		fhuE	b1102	1.06466	0.176383			fhuE	b1102	0.0138565	0.996275		fhuE	b1102	-0.48843	0.574367		fhuE	b1102	-0.0389148	0.990197
fhuF	b4367	-0.102287	0.97305		fhuF	b4367	-0.652919	0.395984		fhuF	b4367	0.0705537	0.988459			fhuF	b4367	-0.233633	0.839698		fhuF	b4367	0.350711	0.900858		fhuF	b4367	0.783252	0.304582			fhuF	b4367	0.207073	0.940089		fhuF	b4367	-0.0891983	0.938999		fhuF	b4367	0.142551	0.989937
fic	b3361	0.574853	0.799391		fic	b3361	1.72338	0.00844179		fic	b3361	1.51935	0.0424059			fic	b3361	0.346497	0.810874		fic	b3361	0.426833	0.900858		fic	b3361	0.598305	0.577231			fic	b3361	0.0218265	0.995507		fic	b3361	0.411286	0.719998		fic	b3361	0.58995	0.984035
fieF	b3915	0.387938	0.895328		fieF	b3915	0.0235033	0.990179		fieF	b3915	-0.307384	0.957842			fieF	b3915	1.10694	0.175988		fieF	b3915	-0.449044	0.858811		fieF	b3915	-0.563478	0.571643			fieF	b3915	0.642204	0.687793		fieF	b3915	-0.181464	0.885637		fieF	b3915	-0.562395	0.984035
fimA	b4314	-0.31043	0.939703		fimA	b4314	0.00994128	0.99606		fimA	b4314	0.388108	0.958124			fimA	b4314	0.393131	0.790286		fimA	b4314	1.04985	0.529383		fimA	b4314	0.692916	0.621152			fimA	b4314	-0.296063	0.930294		fimA	b4314	1.28132	0.143122		fimA	b4314	0.131877	0.990197
fimB	b4312	-0.197321	NA		fimB	b4312	3.08036	NA		fimB	b4312	-0.657298	NA			fimB	b4312	0.499667	NA		fimB	b4312	0.20656	NA		fimB	b4312	-3.28142	NA			fimB	b4312	2.0913	NA		fimB	b4312	-1.46956	NA		fimB	b4312	-1.67208	NA
fimC	b4316	0.170821	NA		fimC	b4316	-0.529264	NA		fimC	b4316	0.91003	NA			fimC	b4316	0.544559	NA		fimC	b4316	0.474865	NA		fimC	b4316	0.936137	NA			fimC	b4316	0.60548	0.930294		fimC	b4316	0.54434	NA		fimC	b4316	1.67315	NA
fimD	b4317	-0.660022	0.936378		fimD	b4317	-0.177307	0.971812		fimD	b4317	1.04549	0.896473			fimD	b4317	0.1534	0.967275		fimD	b4317	-0.893021	0.91019		fimD	b4317	0.525527	0.852284			fimD	b4317	-0.237683	0.973152		fimD	b4317	-0.335841	0.92467		fimD	b4317	1.11633	0.984035
fimE	b4313	1.12861	NA		fimE	b4313	-0.123375	NA		fimE	b4313	2.02429	NA			fimE	b4313	2.8528	0.441511		fimE	b4313	-1.77935	NA		fimE	b4313	-0.0616358	NA			fimE	b4313	0.928694	0.872726		fimE	b4313	0.150692	NA		fimE	b4313	0.950624	0.986829
fimF	b4318	-2.08389	NA		fimF	b4318	1.76101	NA		fimF	b4318	-1.7716	NA			fimF	b4318	-0.877428	NA		fimF	b4318	1.35161	NA		fimF	b4318	-2.37458	NA			fimF	b4318	-1.15756	NA		fimF	b4318	0.334082	NA		fimF	b4318	-1.14371	NA
fimG	b4319	0.00465882	NA		fimG	b4319	1.77726	NA		fimG	b4319	-0.197312	NA			fimG	b4319	-1.68832	NA		fimG	b4319	-0.138405	NA		fimG	b4319	-0.346531	NA			fimG	b4319	-0.942356	0.882255		fimG	b4319	0.28587	NA		fimG	b4319	0.321644	0.990197
fimH	b4320	0.0605614	0.989411		fimH	b4320	-0.251655	0.939433		fimH	b4320	0.552632	0.957842			fimH	b4320	0.687985	0.779496		fimH	b4320	-0.231135	0.971858		fimH	b4320	-0.0305214	0.989603			fimH	b4320	0.238528	0.973152		fimH	b4320	-0.437145	0.835524		fimH	b4320	0.549802	0.986829
fimI	b4315	0.49119	NA		fimI	b4315	0.191336	NA		fimI	b4315	-1.91407	NA			fimI	b4315	0.590103	0.839898		fimI	b4315	-0.2123	NA		fimI	b4315	0.997856	NA			fimI	b4315	-0.0103328	0.999278		fimI	b4315	0.353719	NA		fimI	b4315	-1.90757	0.984035
fis	b3261	-0.107115	0.984662		fis	b3261	2.0315	0.132924		fis	b3261	0.402174	0.970424			fis	b3261	0.313365	0.904919		fis	b3261	-0.643418	0.916205		fis	b3261	-0.693184	0.736307			fis	b3261	0.301333	0.971978		fis	b3261	2.46825	0.0409568		fis	b3261	0.161054	0.990197
fiu	b0805	-0.623508	0.750989		fiu	b0805	-0.509601	0.684303		fiu	b0805	0.0787524	0.989896			fiu	b0805	-0.781815	0.42985		fiu	b0805	0.884747	0.592927		fiu	b0805	0.743101	0.540825			fiu	b0805	-1.29527	0.105399		fiu	b0805	0.0701122	0.962153		fiu	b0805	-0.259615	0.989782
fixA	b0041	-1.37837	NA		fixA	b0041	0.71601	NA		fixA	b0041	4.83577	NA			fixA	b0041	-0.694106	NA		fixA	b0041	-0.660913	NA		fixA	b0041	0.985706	NA			fixA	b0041	-1.07195	NA		fixA	b0041	0.110844	NA		fixA	b0041	0.567862	NA
fixB	b0042	0.0110405	NA		fixB	b0042	0.595338	NA		fixB	b0042	-1.7693	NA			fixB	b0042	-0.735566	NA		fixB	b0042	0.0104119	NA		fixB	b0042	0.995688	NA			fixB	b0042	-0.519107	0.958962		fixB	b0042	-0.355994	NA		fixB	b0042	-0.744357	NA
fixC	b0043	0.507431	NA		fixC	b0043	1.39685	NA		fixC	b0043	-0.338232	NA			fixC	b0043	1.56601	0.588954		fixC	b0043	1.12222	NA		fixC	b0043	-1.31132	NA			fixC	b0043	-0.0461785	0.995507		fixC	b0043	1.70461	NA		fixC	b0043	-0.234963	0.990197
fixX	b0044	-2.35136	NA		fixX	b0044	-0.587089	NA		fixX	b0044	1.93383	NA			fixX	b0044	0.364457	NA		fixX	b0044	1.31246	NA		fixX	b0044	0.995681	NA			fixX	b0044	-0.440054	NA		fixX	b0044	-0.372261	NA		fixX	b0044	0.662099	NA
fklB	b4207	0.134168	0.965611		fklB	b4207	0.549317	0.520495		fklB	b4207	-0.0785121	0.987485			fklB	b4207	-0.472199	0.607292		fklB	b4207	0.294342	0.918257		fklB	b4207	-0.199968	0.852284			fklB	b4207	-0.120255	0.973152		fklB	b4207	-0.397212	0.661545		fklB	b4207	-0.617993	0.9763
fkpA	b3347	0.0113056	0.997717		fkpA	b3347	-0.685955	0.456612		fkpA	b3347	-0.418347	0.903221			fkpA	b3347	-0.572662	0.588954		fkpA	b3347	-0.341343	0.918257		fkpA	b3347	0.157495	0.897649			fkpA	b3347	0.103252	0.974961		fkpA	b3347	0.403577	0.704738		fkpA	b3347	-0.166765	0.989937
fkpB	b0028	-0.283657	0.936378		fkpB	b0028	0.108363	0.958443		fkpB	b0028	0.177372	0.972462			fkpB	b0028	-0.877916	0.32231		fkpB	b0028	-0.953343	0.431273		fkpB	b0028	-0.208549	0.867224			fkpB	b0028	-0.543628	0.755155		fkpB	b0028	0.138831	0.923607		fkpB	b0028	-0.023774	0.991522
flc		0.544487	0.915699		flc		1.35401	0.36405		flc		0.888619	0.819756			flc		0.759163	0.663447		flc		-0.0762502	0.984426		flc		0.23231	0.907191			flc		0.451825	0.907488		flc		0.203736	0.925136		flc		0.361561	0.989782
fldA	b0684	1.00869	0.282433		fldA	b0684	-0.0724225	0.965898		fldA	b0684	0.368764	0.920005			fldA	b0684	0.51139	0.595926		fldA	b0684	-0.624871	0.691829		fldA	b0684	0.177973	0.874801			fldA	b0684	0.578095	0.698459		fldA	b0684	-0.420767	0.658672		fldA	b0684	-0.497644	0.984035
fldB	b2895	-0.107749	0.97305		fldB	b2895	-0.00742224	0.99606		fldB	b2895	-0.0932984	0.98145			fldB	b2895	-0.13212	0.916082		fldB	b2895	-0.244593	0.937985		fldB	b2895	-0.0527197	0.966519			fldB	b2895	0.087848	0.974961		fldB	b2895	-0.247401	0.817345		fldB	b2895	-0.0932622	0.990197
flgA	b1072	-1.05074	0.790485		flgA	b1072	1.53569	0.375559		flgA	b1072	-0.270944	0.98124			flgA	b1072	-0.783585	0.714003		flgA	b1072	0.553807	0.926164		flgA	b1072	-0.562201	0.854294			flgA	b1072	-1.56744	0.399314		flgA	b1072	-0.0175668	0.99049		flgA	b1072	-1.06862	0.986829
flgB	b1073	-1.00054	NA		flgB	b1073	0.153183	NA		flgB	b1073	-0.661112	NA			flgB	b1073	-2.28568	NA		flgB	b1073	0.365745	NA		flgB	b1073	-1.35305	NA			flgB	b1073	-3.21162	0.196758		flgB	b1073	2.74152	NA		flgB	b1073	-0.979199	0.989491
flgC	b1074	-1.07093	NA		flgC	b1074	-0.361027	NA		flgC	b1074	-0.060863	NA			flgC	b1074	-2.1632	NA		flgC	b1074	-0.843322	NA		flgC	b1074	-0.41016	NA			flgC	b1074	-2.82746	0.427421		flgC	b1074	-0.784524	NA		flgC	b1074	-1.58214	0.986829
flgD	b1075	-0.672798	0.915699		flgD	b1075	1.09654	0.687966		flgD	b1075	-0.887612	0.957842			flgD	b1075	-2.32575	0.0830975		flgD	b1075	0.198756	0.978051		flgD	b1075	-0.588542	0.870754			flgD	b1075	-2.516	0.0546586		flgD	b1075	0.29972	0.917374		flgD	b1075	-0.818644	0.986829
flgE	b1076	-0.974867	0.664386		flgE	b1076	-0.215706	0.949957		flgE	b1076	0.453125	0.958124			flgE	b1076	-1.44923	0.175657		flgE	b1076	-0.692912	0.88186		flgE	b1076	-0.292984	0.874801			flgE	b1076	-2.26583	0.00223111		flgE	b1076	-1.0769	0.414565		flgE	b1076	0.923418	0.983744
flgF	b1077	-1.51719	0.693336		flgF	b1077	0.00603267	0.998179		flgF	b1077	1.2188	0.851284			flgF	b1077	-3.85903	0.00112783		flgF	b1077	0.0115164	0.997654		flgF	b1077	0.0494699	0.986489			flgF	b1077	-4.39576	3.96967e-05		flgF	b1077	-0.264974	0.922376		flgF	b1077	-0.00565096	0.997867
flgG	b1078	-0.946084	0.832032		flgG	b1078	-0.741493	0.743025		flgG	b1078	-0.716315	0.957842			flgG	b1078	-2.04648	0.141629		flgG	b1078	-0.26401	0.968511		flgG	b1078	-1.02102	0.709013			flgG	b1078	-2.30058	0.0776442		flgG	b1078	-0.2947	0.906065		flgG	b1078	-0.303086	0.989937
flgH	b1079	0.0732423	NA		flgH	b1079	-1.40527	NA		flgH	b1079	0.500762	NA			flgH	b1079	-1.57332	0.416849		flgH	b1079	-1.53777	NA		flgH	b1079	0.687326	NA			flgH	b1079	-1.66872	0.468985		flgH	b1079	-1.00061	NA		flgH	b1079	0.240839	0.990197
flgI	b1080	0.633741	0.926808		flgI	b1080	0.984647	0.552549		flgI	b1080	-0.762392	0.961197			flgI	b1080	-0.998938	0.578649		flgI	b1080	1.10464	0.691829		flgI	b1080	-1.30535	0.668867			flgI	b1080	-2.07783	0.0905713		flgI	b1080	0.925132	0.51144		flgI	b1080	-0.704646	0.989491
flgJ	b1081	-2.60637	0.562695		flgJ	b1081	0.717851	0.784791		flgJ	b1081	0.112186	0.99255			flgJ	b1081	-2.59862	0.369025		flgJ	b1081	0.339744	0.964701		flgJ	b1081	-0.629037	0.843069			flgJ	b1081	-3.69191	0.120781		flgJ	b1081	0.637282	0.770448		flgJ	b1081	-0.236391	0.990197
flgK	b1082	-0.242068	0.957026		flgK	b1082	1.07786	0.256384		flgK	b1082	0.833658	0.62912			flgK	b1082	-0.842709	0.394092		flgK	b1082	0.565081	0.830025		flgK	b1082	0.362653	0.793726			flgK	b1082	-1.07462	0.256845		flgK	b1082	0.230497	0.866698		flgK	b1082	0.851414	0.9763
flgL	b1083	-0.265845	0.957396		flgL	b1083	-0.0340243	0.990179		flgL	b1083	0.434224	0.957842			flgL	b1083	-0.49366	0.776271		flgL	b1083	-0.348131	0.941174		flgL	b1083	0.543385	0.750964			flgL	b1083	-0.446875	0.893465		flgL	b1083	-0.281959	0.868879		flgL	b1083	0.390495	0.986829
flgM	b1071	-0.367969	0.946716		flgM	b1071	-1.17393	0.280555		flgM	b1071	0.16298	0.981107			flgM	b1071	-0.262808	0.89252		flgM	b1071	0.079485	0.980912		flgM	b1071	1.39837	0.356544			flgM	b1071	-0.0290284	0.994993		flgM	b1071	-0.401223	0.801969		flgM	b1071	0.229321	0.989937
flgN	b1070	0.726323	0.82116		flgN	b1070	-0.211986	0.934576		flgN	b1070	0.0135255	0.997487			flgN	b1070	-0.452797	0.777122		flgN	b1070	-0.283058	0.957531		flgN	b1070	0.934699	0.591536			flgN	b1070	0.15418	0.973152		flgN	b1070	-0.0171873	0.987827		flgN	b1070	0.629799	0.986829
flhA	b1879	-0.209261	0.969047		flhA	b1879	1.24991	0.329914		flhA	b1879	-1.96751	0.652971			flhA	b1879	-0.849991	0.564244		flhA	b1879	0.219388	0.965947		flhA	b1879	-2.71218	0.22034			flhA	b1879	-0.759371	0.754971		flhA	b1879	-0.0262928	0.985163		flhA	b1879	-2.19747	0.959079
flhB	b1880	0.936269	NA		flhB	b1880	1.06887	NA		flhB	b1880	0.295441	NA			flhB	b1880	-0.700458	0.808747		flhB	b1880	0.920835	0.88464		flhB	b1880	-0.337245	NA			flhB	b1880	-0.711375	0.890851		flhB	b1880	1.16203	NA		flhB	b1880	0.902293	0.986829
flhC	b1891	-0.251431	0.97305		flhC	b1891	-0.155128	0.965898		flhC	b1891	-0.167646	0.988459			flhC	b1891	0.175903	0.952238		flhC	b1891	0.493679	0.947562		flhC	b1891	-0.0767064	0.979615			flhC	b1891	-0.0658572	0.992717		flhC	b1891	0.640448	0.778797		flhC	b1891	-1.34449	0.983105
flhD	b1892	-2.32212	0.324711		flhD	b1892	0.261773	0.947048		flhD	b1892	0.563434	0.962183			flhD	b1892	-2.76069	0.0704491		flhD	b1892	0.495802	0.947562		flhD	b1892	1.43928	0.540983			flhD	b1892	-1.94701	0.392649		flhD	b1892	0.962831	0.63332		flhD	b1892	-0.725089	0.986829
flhE	b1878	-1.52125	NA		flhE	b1878	-1.4892	NA		flhE	b1878	-0.660764	NA			flhE	b1878	-2.53975	NA		flhE	b1878	-1.38702	NA		flhE	b1878	-1.98845	NA			flhE	b1878	-1.77556	0.766868		flhE	b1878	-0.434032	NA		flhE	b1878	-1.1075	NA
fliA	b1922	-0.311642	0.966071		fliA	b1922	0.332062	0.939857		fliA	b1922	-0.233423	0.98145			fliA	b1922	-1.663	0.254778		fliA	b1922	-0.770021	0.904903		fliA	b1922	0.223044	0.942405			fliA	b1922	-2.28952	0.047933		fliA	b1922	-1.036	0.598317		fliA	b1922	0.90205	0.986829
fliC	b1923	0.152678	0.96293		fliC	b1923	-0.144367	0.928739		fliC	b1923	-0.474447	0.855479			fliC	b1923	0.469438	0.634746		fliC	b1923	-0.520313	0.774594		fliC	b1923	-0.197662	0.856209			fliC	b1923	0.0655758	0.983058		fliC	b1923	0.185062	0.877569		fliC	b1923	0.208199	0.989782
fliD	b1924	-0.0331612	0.997717		fliD	b1924	-0.496038	0.862048		fliD	b1924	0.333986	0.972462			fliD	b1924	0.949069	0.651821		fliD	b1924	-1.05588	0.788561		fliD	b1924	0.486295	0.829207			fliD	b1924	-0.416316	0.93471		fliD	b1924	-1.00333	0.560704		fliD	b1924	0.782977	0.986829
fliE	b1937	-1.38986	NA		fliE	b1937	-0.592463	NA		fliE	b1937	1.1986	NA			fliE	b1937	-1.70448	NA		fliE	b1937	-0.233427	NA		fliE	b1937	2.55175	NA			fliE	b1937	-0.910011	0.914188		fliE	b1937	0.522734	NA		fliE	b1937	0.506404	NA
fliF	b1938	-0.863927	0.870971		fliF	b1938	0.152454	0.967995		fliF	b1938	-0.313382	0.981107			fliF	b1938	-2.37586	0.0666		fliF	b1938	0.670264	0.918257		fliF	b1938	0.462435	0.907191			fliF	b1938	-2.25041	0.105399		fliF	b1938	0.353613	0.889414		fliF	b1938	-0.593925	0.989937
fliG	b1939	-0.23801	0.973724		fliG	b1939	-0.739817	0.735793		fliG	b1939	-0.821155	0.958124			fliG	b1939	-1.9509	0.196734		fliG	b1939	0.513183	0.937985		fliG	b1939	-1.64446	0.558264			fliG	b1939	-2.41958	0.0679259		fliG	b1939	-0.175789	0.940029		fliG	b1939	-1.50791	0.984035
fliH	b1940	-1.68208	0.380823		fliH	b1940	-0.215216	0.946288		fliH	b1940	-0.410203	0.972462			fliH	b1940	-0.900162	0.607292		fliH	b1940	0.361462	0.957531		fliH	b1940	-0.554942	0.825837			fliH	b1940	-1.35451	0.447125		fliH	b1940	0.00134233	0.999689		fliH	b1940	-0.459311	0.989491
fliI	b1941	-0.412391	0.957026		fliI	b1941	0.0259114	0.994331		fliI	b1941	1.19415	0.787253			fliI	b1941	-1.00997	0.584919		fliI	b1941	0.105261	0.980251		fliI	b1941	0.820277	0.747682			fliI	b1941	-1.36951	0.499604		fliI	b1941	0.44236	0.843738		fliI	b1941	0.918776	0.984035
fliJ	b1942	-1.42471	NA		fliJ	b1942	2.86626	NA		fliJ	b1942	2.09074	NA			fliJ	b1942	-1.63384	NA		fliJ	b1942	-0.695926	NA		fliJ	b1942	0.50545	NA			fliJ	b1942	-2.56325	NA		fliJ	b1942	0.8113	NA		fliJ	b1942	1.32345	NA
fliK	b1943	-1.85108	0.555289		fliK	b1943	-1.02397	0.654741		fliK	b1943	-1.89358	0.851284			fliK	b1943	-0.384755	0.905451		fliK	b1943	-1.37969	0.691829		fliK	b1943	-2.35878	0.501724			fliK	b1943	-1.78957	0.461176		fliK	b1943	-1.08442	0.564575		fliK	b1943	-1.37219	0.986829
fliL	b1944	-0.587918	NA		fliL	b1944	0.635023	NA		fliL	b1944	-0.703999	NA			fliL	b1944	-0.876612	NA		fliL	b1944	-0.127149	NA		fliL	b1944	-1.62383	NA			fliL	b1944	-1.80397	0.592788		fliL	b1944	0.146223	NA		fliL	b1944	2.68115	0.984035
fliM	b1945	-0.556185	0.913068		fliM	b1945	-0.170439	0.958878		fliM	b1945	-0.617562	0.955828			fliM	b1945	-0.380125	0.856657		fliM	b1945	-0.408483	0.941174		fliM	b1945	-1.64388	0.323504			fliM	b1945	-0.895392	0.724284		fliM	b1945	-0.712065	0.650459		fliM	b1945	-0.577715	0.986829
fliN	b1946	-1.38758	NA		fliN	b1946	1.55077	NA		fliN	b1946	-1.77643	NA			fliN	b1946	-2.75903	NA		fliN	b1946	1.77788	NA		fliN	b1946	-2.73824	NA			fliN	b1946	-3.03139	NA		fliN	b1946	1.5514	NA		fliN	b1946	-0.0579926	NA
fliO	b1947	-0.976072	NA		fliO	b1947	0.770033	NA		fliO	b1947	0.876178	NA			fliO	b1947	-0.489634	NA		fliO	b1947	0.00208689	NA		fliO	b1947	0.951809	NA			fliO	b1947	-1.28353	NA		fliO	b1947	-0.887423	NA		fliO	b1947	1.04535	NA
fliP	b1948	0.52278	NA		fliP	b1948	-1.36105	NA		fliP	b1948	2.06283	NA			fliP	b1948	0.228349	NA		fliP	b1948	-0.186547	NA		fliP	b1948	3.94751	NA			fliP	b1948	0.440275	0.968083		fliP	b1948	0.442147	NA		fliP	b1948	1.78926	0.984035
fliQ	b1949	0.819834	NA		fliQ	b1949	-0.869145	NA		fliQ	b1949	1.44585	NA			fliQ	b1949	-2.2063	NA		fliQ	b1949	-0.806421	NA		fliQ	b1949	0.942373	NA			fliQ	b1949	-0.864829	NA		fliQ	b1949	-0.712633	NA		fliQ	b1949	3.06528	NA
fliR	b1950	-1.31434	NA		fliR	b1950	2.3417	NA		fliR	b1950	-1.10474	NA			fliR	b1950	-1.40065	0.578649		fliR	b1950	-0.310504	NA		fliR	b1950	-2.22023	NA			fliR	b1950	-1.43046	0.712383		fliR	b1950	0.00906407	NA		fliR	b1950	-0.369964	0.990197
fliS	b1925	-1.01862	NA		fliS	b1925	-2.17191	NA		fliS	b1925	-1.25111	NA			fliS	b1925	-0.193794	NA		fliS	b1925	-1.56187	NA		fliS	b1925	-1.43772	NA			fliS	b1925	0.0808193	0.994672		fliS	b1925	-0.592101	NA		fliS	b1925	-0.930586	NA
fliT	b1926	1.00935	NA		fliT	b1926	-0.900918	NA		fliT	b1926	-0.560598	NA			fliT	b1926	0.701466	NA		fliT	b1926	-2.32712	NA		fliT	b1926	-0.497009	NA			fliT	b1926	-0.617975	NA		fliT	b1926	-0.32595	NA		fliT	b1926	-0.524721	NA
fliY	b1920	-0.510789	0.902536		fliY	b1920	0.213896	0.935398		fliY	b1920	1.2289	0.538482			fliY	b1920	-0.266279	0.895774		fliY	b1920	0.390579	0.937985		fliY	b1920	1.4096	0.24193			fliY	b1920	-1.30436	0.392649		fliY	b1920	-1.03061	0.391229		fliY	b1920	0.127696	0.990197
fliZ	b1921	-0.875514	0.832032		fliZ	b1921	0.300074	0.909092		fliZ	b1921	1.69236	0.263422			fliZ	b1921	-0.842036	0.663354		fliZ	b1921	0.567355	0.91019		fliZ	b1921	3.44467	0.0963349			fliZ	b1921	-1.59862	0.322922		fliZ	b1921	-0.0367121	0.983021		fliZ	b1921	1.17486	0.9763
flk	b2321	-0.587266	0.846031		flk	b2321	-0.164763	0.946288		flk	b2321	0.0728137	0.991827			flk	b2321	-0.274463	0.87444		flk	b2321	-0.295535	0.952163		flk	b2321	-0.707008	0.621152			flk	b2321	-0.314275	0.931128		flk	b2321	0.186256	0.914885		flk	b2321	-0.391499	0.986829
flu	b2000	0.0632599	0.982291		flu	b2000	-0.552702	0.579295		flu	b2000	-0.0864425	0.988459			flu	b2000	-0.62868	0.50708		flu	b2000	-0.12612	0.971858		flu	b2000	-0.0265186	0.985564			flu	b2000	0.15154	0.969807		flu	b2000	-0.332926	0.762993		flu	b2000	0.622007	0.983105
flxA	b1566	0.356177	NA		flxA	b1566	0.59579	NA		flxA	b1566	-0.881605	NA			flxA	b1566	1.3498	NA		flxA	b1566	2.83811	NA		flxA	b1566	-0.46517	NA			flxA	b1566	0.95371	NA		flxA	b1566	0.926653	NA		flxA	b1566	-0.0425452	NA
fmt	b3288	0.0121448	0.997717		fmt	b3288	-0.1621	0.886553		fmt	b3288	-0.45441	0.791249			fmt	b3288	0.449042	0.552512		fmt	b3288	0.0362503	0.984136		fmt	b3288	-0.71374	0.264832			fmt	b3288	0.373346	0.771528		fmt	b3288	-0.0564253	0.953451		fmt	b3288	-0.140665	0.989937
fnr	b1334	-0.0138963	0.997717		fnr	b1334	-0.457104	0.551021		fnr	b1334	-0.342218	0.902741			fnr	b1334	-0.0428401	0.972516		fnr	b1334	0.34736	0.867153		fnr	b1334	-0.0426817	0.964358			fnr	b1334	0.44801	0.727367		fnr	b1334	0.211116	0.820798		fnr	b1334	0.150264	0.989937
fnrS	b4699	0.468799	NA		fnrS	b4699	0.380708	NA		fnrS	b4699	0.542192	NA			fnrS	b4699	2.68636	0.580134		fnrS	b4699	-0.480012	NA		fnrS	b4699	-0.500816	NA			fnrS	b4699	2.49864	0.749803		fnrS	b4699	0.914897	NA		fnrS	b4699	1.87738	0.986829
focA	b0904	0.428393	0.914581		focA	b0904	-0.235623	0.909092		focA	b0904	0.0942799	0.988459			focA	b0904	1.16163	0.320186		focA	b0904	-1.05073	0.556619		focA	b0904	-0.6266	0.626927			focA	b0904	0.575549	0.830194		focA	b0904	0.137357	0.938999		focA	b0904	0.115493	0.990197
focB	b2492	-0.807096	0.832032		focB	b2492	0.386705	0.863359		focB	b2492	0.131208	0.988459			focB	b2492	1.18532	0.574032		focB	b2492	-0.545861	0.896451		focB	b2492	1.5092	0.44562			focB	b2492	-0.00858588	0.999278		focB	b2492	-0.498444	0.724434		focB	b2492	0.257304	0.989937
folA	b0048	0.232583	0.953993		folA	b0048	0.315096	0.817784		folA	b0048	0.165817	0.972653			folA	b0048	0.141355	0.916548		folA	b0048	-0.572689	0.760983		folA	b0048	-1.02371	0.232163			folA	b0048	0.535512	0.75473		folA	b0048	1.26327	0.0516288		folA	b0048	-0.0226872	0.992032
folB	b3058	-0.0967266	0.982291		folB	b3058	0.781696	0.572175		folB	b3058	-0.434639	0.970424			folB	b3058	-0.341986	0.849643		folB	b3058	-0.21187	0.964932		folB	b3058	-0.79316	0.689807			folB	b3058	-0.374026	0.914188		folB	b3058	0.327062	0.830588		folB	b3058	-0.491121	0.986829
folC	b2315	-0.0881567	0.973724		folC	b2315	0.80745	0.232701		folC	b2315	0.257099	0.958124			folC	b2315	-0.938487	0.118263		folC	b2315	-0.750957	0.476187		folC	b2315	-0.652675	0.438011			folC	b2315	-0.623416	0.531082		folC	b2315	0.12803	0.909897		folC	b2315	-0.207873	0.989491
folD	b0529	-0.00738716	0.997717		folD	b0529	-0.492772	0.585593		folD	b0529	-0.303983	0.952667			folD	b0529	-1.3152	0.0147388		folD	b0529	0.108934	0.971858		folD	b0529	0.0717776	0.948786			folD	b0529	-0.162634	0.960546		folD	b0529	-0.200047	0.855369		folD	b0529	0.05332	0.990197
folE	b2153	0.609046	0.755347		folE	b2153	0.442346	0.706855		folE	b2153	0.0136613	0.996787			folE	b2153	0.250306	0.851486		folE	b2153	0.398534	0.903624		folE	b2153	0.0657999	0.962087			folE	b2153	0.874708	0.439812		folE	b2153	0.327434	0.781732		folE	b2153	-0.632	0.983105
folK	b0142	-0.848099	NA		folK	b0142	-0.963154	NA		folK	b0142	-0.492572	NA			folK	b0142	-0.966897	0.651797		folK	b0142	-0.695122	0.931415		folK	b0142	0.00122712	NA			folK	b0142	-0.791321	0.842214		folK	b0142	-0.861371	NA		folK	b0142	1.66041	0.984035
folM	b1606	-0.341935	0.899307		folM	b1606	0.219468	0.87621		folM	b1606	0.716602	0.612323			folM	b1606	0.389525	0.72068		folM	b1606	-0.343631	0.904903		folM	b1606	0.709354	0.438011			folM	b1606	0.206375	0.943329		folM	b1606	-0.201358	0.858098		folM	b1606	0.804989	0.932115
folP	b3177	0.0445115	0.984662		folP	b3177	0.264955	0.85156		folP	b3177	0.537061	0.851284			folP	b3177	-0.553766	0.560846		folP	b3177	0.0592255	0.978051		folP	b3177	0.257305	0.838675			folP	b3177	-0.379779	0.841207		folP	b3177	0.866202	0.230803		folP	b3177	0.326627	0.986829
folX	b2303	0.468019	0.9178		folX	b2303	0.385654	0.86142		folX	b2303	-0.118601	0.988459			folX	b2303	0.246856	0.903209		folX	b2303	0.054797	0.985837		folX	b2303	0.0343503	0.986489			folX	b2303	-0.244032	0.969807		folX	b2303	0.0736324	0.969641		folX	b2303	-0.403701	0.986829
fpr	b3924	0.97699	0.248243		fpr	b3924	-0.568739	0.487766		fpr	b3924	-0.599721	0.785488			fpr	b3924	0.374274	0.682365		fpr	b3924	-0.334011	0.903624		fpr	b3924	-0.557704	0.579247			fpr	b3924	0.814322	0.306782		fpr	b3924	-1.87143	4.70818e-05		fpr	b3924	-1.06986	0.620406
frc	b2374	0.128017	0.982291		frc	b2374	-0.218669	0.964628		frc	b2374	1.15616	0.855487			frc	b2374	0.220017	0.936758		frc	b2374	-2.23288	0.258		frc	b2374	-1.88524	0.319622			frc	b2374	-0.456363	0.930294		frc	b2374	-0.881842	0.682926		frc	b2374	0.820879	0.986829
frdA	b4154	0.252364	0.94124		frdA	b4154	0.705805	0.378056		frdA	b4154	1.22021	0.0761639			frdA	b4154	-0.140329	0.910332		frdA	b4154	1.09777	0.185954		frdA	b4154	0.76073	0.363786			frdA	b4154	-0.521097	0.743395		frdA	b4154	0.866782	0.21473		frdA	b4154	0.29068	0.986829
frdB	b4153	-0.0281261	0.989411		frdB	b4153	0.138066	0.935398		frdB	b4153	0.877579	0.46736			frdB	b4153	-0.323988	0.775338		frdB	b4153	1.17188	0.154573		frdB	b4153	1.24572	0.124734			frdB	b4153	-0.465707	0.771528		frdB	b4153	1.0566	0.102717		frdB	b4153	0.255792	0.986829
frdC	b4152	0.300862	0.951799		frdC	b4152	-0.226525	0.89993		frdC	b4152	0.711502	0.819756			frdC	b4152	0.366469	0.813211		frdC	b4152	1.58714	0.101405		frdC	b4152	0.882917	0.510319			frdC	b4152	-0.323427	0.915197		frdC	b4152	1.2772	0.124938		frdC	b4152	0.267179	0.989937
frdD	b4151	-0.172457	0.97305		frdD	b4151	0.25742	0.910269		frdD	b4151	0.641066	0.903221			frdD	b4151	0.755082	0.631705		frdD	b4151	1.36656	0.449775		frdD	b4151	0.245903	0.899327			frdD	b4151	-0.0255301	0.995537		frdD	b4151	0.887871	0.469518		frdD	b4151	0.292247	0.989937
fre	b3844	0.050998	0.978968		fre	b3844	-0.212039	0.837521		fre	b3844	-0.131968	0.972462			fre	b3844	0.198183	0.834677		fre	b3844	0.26898	0.905198		fre	b3844	0.198974	0.839461			fre	b3844	0.34298	0.793733		fre	b3844	-0.401026	0.533615		fre	b3844	-0.32729	0.986829
frlA	b3370	-1.22672	NA		frlA	b3370	-0.655274	NA		frlA	b3370	-0.102759	NA			frlA	b3370	-1.08915	NA		frlA	b3370	-0.0354575	NA		frlA	b3370	0.975509	NA			frlA	b3370	-0.911804	0.901788		frlA	b3370	-0.640246	NA		frlA	b3370	-0.102433	0.991522
frlB	b3371	-0.0869241	0.985463		frlB	b3371	0.931365	0.705753		frlB	b3371	0.126061	0.991827			frlB	b3371	0.835034	0.735482		frlB	b3371	0.201927	0.977318		frlB	b3371	-0.705271	0.807395			frlB	b3371	-0.451088	0.934497		frlB	b3371	-0.502652	0.82751		frlB	b3371	-0.393493	0.989937
frlC	b4474	0.955317	0.82116		frlC	b4474	0.260464	0.935398		frlC	b4474	0.0144879	0.998041			frlC	b4474	1.12608	0.539372		frlC	b4474	0.314882	0.964234		frlC	b4474	0.370624	0.879481			frlC	b4474	-0.341708	0.943329		frlC	b4474	-0.150547	0.94412		frlC	b4474	0.371733	0.989937
frlD	b3374	-0.681335	0.82116		frlD	b3374	0.21192	0.935398		frlD	b3374	-0.666249	0.933708			frlD	b3374	-0.371457	0.837874		frlD	b3374	0.43879	0.926661		frlD	b3374	-0.3369	0.87976			frlD	b3374	-0.335743	0.930294		frlD	b3374	0.507733	0.734988		frlD	b3374	0.277543	0.989937
frlR	b3375	-0.769786	0.631987		frlR	b3375	-0.0490113	0.983436		frlR	b3375	0.363999	0.957842			frlR	b3375	-0.31791	0.813211		frlR	b3375	0.157202	0.965947		frlR	b3375	0.197102	0.899327			frlR	b3375	-0.0577829	0.988008		frlR	b3375	-0.424059	0.689431		frlR	b3375	0.347736	0.986829
frmA	b0356	-0.218264	0.956467		frmA	b0356	0.473094	0.673618		frmA	b0356	0.0642765	0.99084			frmA	b0356	0.0106041	0.995844		frmA	b0356	0.756201	0.634242		frmA	b0356	-0.257426	0.843069			frmA	b0356	-0.661829	0.657855		frmA	b0356	0.429143	0.675426		frmA	b0356	0.134814	0.989937
frmB	b0355	0.369862	0.870081		frmB	b0355	-0.619743	0.426175		frmB	b0355	-0.166724	0.972462			frmB	b0355	0.532868	0.543416		frmB	b0355	0.214156	0.947875		frmB	b0355	0.16091	0.899125			frmB	b0355	0.247521	0.905836		frmB	b0355	0.224818	0.832066		frmB	b0355	-0.0360145	0.990561
frmR	b0357	-0.919987	0.618612		frmR	b0357	0.363178	0.862132		frmR	b0357	-0.262025	0.972653			frmR	b0357	-0.473585	0.743167		frmR	b0357	0.0527826	0.985271		frmR	b0357	0.149715	0.942405			frmR	b0357	-1.05872	0.392649		frmR	b0357	-0.0453732	0.975887		frmR	b0357	-0.0284044	0.993943
frr	b0172	0.11213	0.969047		frr	b0172	0.0272222	0.986988		frr	b0172	0.0600768	0.989656			frr	b0172	-0.339919	0.740429		frr	b0172	-0.33606	0.903624		frr	b0172	-0.0398719	0.969051			frr	b0172	-0.174802	0.950797		frr	b0172	0.717911	0.289366		frr	b0172	0.241269	0.986829
frsA	b0239	0.404035	0.848761		frsA	b0239	-0.0431384	0.983404		frsA	b0239	-0.494416	0.873975			frsA	b0239	-0.0904596	0.94415		frsA	b0239	0.156515	0.964701		frsA	b0239	-0.648868	0.518241			frsA	b0239	0.480131	0.755155		frsA	b0239	0.0546779	0.962598		frsA	b0239	-0.652792	0.983105
fruA	b2167	-0.67409	0.500778		fruA	b2167	1.14698	0.0139745		fruA	b2167	0.172187	0.970424			fruA	b2167	-0.26476	0.789908		fruA	b2167	0.525997	0.691716		fruA	b2167	-0.460437	0.532489			fruA	b2167	-0.73376	0.346509		fruA	b2167	1.05439	0.0303538		fruA	b2167	0.092273	0.990197
fruB	b2169	-0.0816545	0.984662		fruB	b2169	1.9926	0.043655		fruB	b2169	0.753829	0.873975			fruB	b2169	-0.452675	0.822894		fruB	b2169	0.952016	0.719884		fruB	b2169	-1.16905	0.395548			fruB	b2169	-0.389207	0.930294		fruB	b2169	3.80468	1.85732e-06		fruB	b2169	-1.84667	0.437507
fruK	b2168	-0.565966	0.691007		fruK	b2168	1.1738	0.0286342		fruK	b2168	0.256645	0.957842			fruK	b2168	-0.283031	0.80169		fruK	b2168	0.454272	0.80648		fruK	b2168	-0.194096	0.843069			fruK	b2168	-0.731508	0.439812		fruK	b2168	1.07608	0.0514621		fruK	b2168	-0.0631339	0.990197
frvA	b3900	1.5248	NA		frvA	b3900	-1.21817	NA		frvA	b3900	0.347805	NA			frvA	b3900	2.3762	NA		frvA	b3900	-0.287162	NA		frvA	b3900	-0.391299	NA			frvA	b3900	0.628571	NA		frvA	b3900	-0.826888	NA		frvA	b3900	0.57018	NA
frvB	b3899	-1.14577	0.802968		frvB	b3899	-0.252649	0.955436		frvB	b3899	-0.27559	0.98145			frvB	b3899	-0.061225	0.985634		frvB	b3899	-0.486225	0.953016		frvB	b3899	-1.00858	0.773644			frvB	b3899	0.189743	0.97697		frvB	b3899	0.176726	0.952541		frvB	b3899	-0.624054	0.989937
frvR	b3897	-0.786301	NA		frvR	b3897	-1.02524	NA		frvR	b3897	-1.09647	NA			frvR	b3897	0.0516125	0.988456		frvR	b3897	-0.314451	NA		frvR	b3897	-0.961922	NA			frvR	b3897	-0.209681	0.974961		frvR	b3897	-0.0547846	NA		frvR	b3897	-1.32375	0.986829
frvX	b3898	-0.855801	0.846446		frvX	b3898	1.56238	0.368268		frvX	b3898	0.399265	0.972462			frvX	b3898	-0.0787049	0.979633		frvX	b3898	-0.692124	0.888004		frvX	b3898	-1.14592	0.599686			frvX	b3898	-0.345897	0.955009		frvX	b3898	0.276324	0.901124		frvX	b3898	0.159643	0.990197
frwA	b3947	-1.0786	0.793617		frwA	b3947	-0.219198	0.959338		frwA	b3947	1.16906	0.851284			frwA	b3947	0.346769	0.901935		frwA	b3947	0.00885246	0.998054		frwA	b3947	-0.780528	0.762358			frwA	b3947	-1.02186	0.755155		frwA	b3947	-0.207288	0.938999		frwA	b3947	0.528382	0.989491
frwB	b3950	-1.0717	NA		frwB	b3950	-1.44908	NA		frwB	b3950	0.993802	NA			frwB	b3950	0.0798883	NA		frwB	b3950	-0.593984	NA		frwB	b3950	0.934833	NA			frwB	b3950	-0.547258	0.969807		frwB	b3950	-0.920121	NA		frwB	b3950	0.627683	NA
frwC	b3949	-2.22891	NA		frwC	b3949	1.62285	NA		frwC	b3949	-0.970538	NA			frwC	b3949	-0.467981	NA		frwC	b3949	-1.20499	NA		frwC	b3949	-1.01523	NA			frwC	b3949	-1.59558	0.841207		frwC	b3949	-0.288211	NA		frwC	b3949	-0.750202	0.989937
frwD	b3953	-1.68422	NA		frwD	b3953	-1.87052	NA		frwD	b3953	0.481133	NA			frwD	b3953	-0.0823448	0.983324		frwD	b3953	-0.913188	NA		frwD	b3953	-0.558331	NA			frwD	b3953	0.248751	0.973152		frwD	b3953	-1.27094	NA		frwD	b3953	-0.24694	0.990197
fryA	b2383	-1.01325	0.624511		fryA	b2383	-0.108655	0.965898		fryA	b2383	-0.910161	0.829638			fryA	b2383	-0.777355	0.574329		fryA	b2383	-0.529074	0.887517		fryA	b2383	-0.886927	0.614029			fryA	b2383	-0.656952	0.778548		fryA	b2383	0.139177	0.937433		fryA	b2383	-1.00486	0.983105
fryB	b2387	-0.207865	NA		fryB	b2387	1.34574	NA		fryB	b2387	0.0723453	NA			fryB	b2387	2.91441	NA		fryB	b2387	-0.603707	NA		fryB	b2387	-0.412821	NA			fryB	b2387	1.02515	0.91225		fryB	b2387	0.0112061	NA		fryB	b2387	-0.977424	NA
fryC	b2386	0.619032	NA		fryC	b2386	1.22689	NA		fryC	b2386	1.06101	NA			fryC	b2386	4.40768	0.0952231		fryC	b2386	0.608175	0.928231		fryC	b2386	-0.726751	NA			fryC	b2386	1.2849	0.666203		fryC	b2386	0.864248	NA		fryC	b2386	0.232856	0.990197
fsaA	b0825	0.41581	0.936378		fsaA	b0825	-0.39648	0.830825		fsaA	b0825	-2.20056	0.558023			fsaA	b0825	-0.13646	0.94415		fsaA	b0825	-0.0158683	0.995276		fsaA	b0825	-3.19637	0.104165			fsaA	b0825	0.216099	0.967623		fsaA	b0825	-0.247961	0.88262		fsaA	b0825	-2.43853	0.82278
fsaB	b3946	-1.452	NA		fsaB	b3946	-1.23348	NA		fsaB	b3946	-0.54305	NA			fsaB	b3946	-3.33019	0.257946		fsaB	b3946	-0.905744	NA		fsaB	b3946	-1.6243	NA			fsaB	b3946	-3.37052	0.314372		fsaB	b3946	-0.713826	NA		fsaB	b3946	-2.04988	0.984035
fsr	b0479	0.253586	0.956467		fsr	b0479	0.887756	0.328026		fsr	b0479	0.871624	0.62912			fsr	b0479	0.887795	0.381146		fsr	b0479	1.31514	0.16259		fsr	b0479	0.963493	0.416744			fsr	b0479	0.834483	0.502192		fsr	b0479	0.459578	0.665284		fsr	b0479	0.320973	0.986829
ftnA	b1905	0.0846686	0.985526		ftnA	b1905	0.226356	0.953065		ftnA	b1905	0.074487	0.996787			ftnA	b1905	-0.199864	0.946322		ftnA	b1905	-1.1203	0.748527		ftnA	b1905	-0.560958	0.86049			ftnA	b1905	0.000416936	0.999612		ftnA	b1905	0.317318	0.898254		ftnA	b1905	-0.645825	0.989491
ftnB	b1902	-0.35436	0.952141		ftnB	b1902	0.78966	0.595422		ftnB	b1902	-0.885963	0.86548			ftnB	b1902	0.594147	0.741743		ftnB	b1902	0.140639	0.977318		ftnB	b1902	-1.18175	0.501829			ftnB	b1902	0.224114	0.969807		ftnB	b1902	0.534958	0.700261		ftnB	b1902	-0.637579	0.986829
ftsA	b0094	0.199503	0.957396		ftsA	b0094	0.642301	0.46083		ftsA	b0094	0.457311	0.880892			ftsA	b0094	-0.390039	0.725806		ftsA	b0094	0.171793	0.964701		ftsA	b0094	0.765983	0.361115			ftsA	b0094	-0.614901	0.689208		ftsA	b0094	0.36808	0.714987		ftsA	b0094	0.190248	0.989937
ftsB	b2748	-0.261514	0.932689		ftsB	b2748	0.226002	0.867777		ftsB	b2748	0.320257	0.945679			ftsB	b2748	-0.567684	0.536206		ftsB	b2748	-0.00676464	0.997498		ftsB	b2748	0.517154	0.597332			ftsB	b2748	-0.0142931	0.996275		ftsB	b2748	0.859849	0.198067		ftsB	b2748	0.836381	0.888352
ftsE	b3463	-0.21601	0.915699		ftsE	b3463	0.131002	0.900393		ftsE	b3463	-0.219259	0.957842			ftsE	b3463	-0.620351	0.266485		ftsE	b3463	-0.0039248	0.997654		ftsE	b3463	-0.17625	0.841916			ftsE	b3463	-0.380651	0.722853		ftsE	b3463	0.0925422	0.92264		ftsE	b3463	0.136579	0.989937
ftsH	b3178	-0.149388	0.957396		ftsH	b3178	0.0351247	0.983436		ftsH	b3178	-0.285445	0.933708			ftsH	b3178	-0.150839	0.892277		ftsH	b3178	-0.153637	0.96163		ftsH	b3178	-0.268408	0.755092			ftsH	b3178	0.00150297	0.999278		ftsH	b3178	0.692801	0.236828		ftsH	b3178	0.35494	0.984035
ftsI	b0084	0.0685883	0.980743		ftsI	b0084	-0.126251	0.947828		ftsI	b0084	-0.408871	0.903221			ftsI	b0084	0.113966	0.937419		ftsI	b0084	-1.07474	0.243883		ftsI	b0084	-0.166147	0.886747			ftsI	b0084	-0.295501	0.911012		ftsI	b0084	0.343539	0.756411		ftsI	b0084	-0.249438	0.989491
ftsK	b0890	-0.135337	0.939703		ftsK	b0890	-0.457042	0.257144		ftsK	b0890	-0.112361	0.970424			ftsK	b0890	-0.54061	0.168513		ftsK	b0890	-0.168824	0.918257		ftsK	b0890	0.231031	0.683953			ftsK	b0890	-0.217265	0.830194		ftsK	b0890	-0.128375	0.835355		ftsK	b0890	0.136955	0.986829
ftsL	b0083	-0.000423512	0.999899		ftsL	b0083	-0.282241	0.828967		ftsL	b0083	-0.740753	0.626498			ftsL	b0083	-0.499539	0.597524		ftsL	b0083	-0.169302	0.964234		ftsL	b0083	-0.126765	0.919895			ftsL	b0083	-0.0989237	0.973152		ftsL	b0083	0.950209	0.149032		ftsL	b0083	-0.299467	0.986829
ftsN	b3933	-0.620948	0.589443		ftsN	b3933	-0.0830073	0.959338		ftsN	b3933	-0.203836	0.970424			ftsN	b3933	-0.402936	0.641477		ftsN	b3933	0.242895	0.928231		ftsN	b3933	-0.196343	0.843069			ftsN	b3933	-0.311114	0.862729		ftsN	b3933	0.524546	0.451126		ftsN	b3933	0.227713	0.986829
ftsP	b3017	-0.284858	0.883619		ftsP	b3017	0.0356577	0.983103		ftsP	b3017	0.350934	0.897309			ftsP	b3017	-0.414058	0.574329		ftsP	b3017	0.0595814	0.978051		ftsP	b3017	0.400644	0.628994			ftsP	b3017	-0.102326	0.973152		ftsP	b3017	0.121758	0.898254		ftsP	b3017	0.0589424	0.990197
ftsQ	b0093	-0.319152	0.87469		ftsQ	b0093	0.30477	0.755459		ftsQ	b0093	-0.0254946	0.996787			ftsQ	b0093	-0.674801	0.337632		ftsQ	b0093	-0.172029	0.957531		ftsQ	b0093	0.0897264	0.925327			ftsQ	b0093	-0.70811	0.392649		ftsQ	b0093	0.563023	0.393781		ftsQ	b0093	0.121068	0.989937
ftsW	b0089	0.055874	0.982291		ftsW	b0089	-0.0444419	0.98198		ftsW	b0089	-0.62737	0.670708			ftsW	b0089	-0.0853908	0.943734		ftsW	b0089	-0.0843533	0.977318		ftsW	b0089	-0.271737	0.797222			ftsW	b0089	0.0345566	0.990849		ftsW	b0089	0.473641	0.530857		ftsW	b0089	-0.288373	0.986829
ftsX	b3462	-0.126378	0.957396		ftsX	b3462	0.144846	0.892952		ftsX	b3462	-0.421766	0.819756			ftsX	b3462	-0.100332	0.91006		ftsX	b3462	-0.141441	0.957531		ftsX	b3462	-0.483916	0.518241			ftsX	b3462	-0.17284	0.928572		ftsX	b3462	-0.0792225	0.931489		ftsX	b3462	-0.212279	0.986829
ftsY	b3464	0.200296	0.917569		ftsY	b3464	0.321265	0.6425		ftsY	b3464	-0.0637282	0.98145			ftsY	b3464	-1.03296	0.00526179		ftsY	b3464	-0.160544	0.942525		ftsY	b3464	0.00502615	0.99458			ftsY	b3464	-0.659181	0.238363		ftsY	b3464	0.0631034	0.938999		ftsY	b3464	-0.0993845	0.989937
ftsZ	b0095	-0.258972	0.926157		ftsZ	b0095	0.782499	0.262019		ftsZ	b0095	0.0759604	0.985441			ftsZ	b0095	-0.0503041	0.971905		ftsZ	b0095	0.601619	0.691716		ftsZ	b0095	0.255852	0.800142			ftsZ	b0095	-0.385544	0.830194		ftsZ	b0095	0.185243	0.871797		ftsZ	b0095	-0.0656289	0.990197
fucA	b2800	-0.232648	0.974294		fucA	b2800	1.48405	0.6203		fucA	b2800	-2.24083	0.791249			fucA	b2800	-1.11679	0.640046		fucA	b2800	0.10114	0.984656		fucA	b2800	-4.23161	0.146816			fucA	b2800	-1.52859	0.592788		fucA	b2800	0.557699	0.840361		fucA	b2800	-3.72913	0.783174
fucI	b2802	-1.30577	0.459639		fucI	b2802	-0.0148887	0.994331		fucI	b2802	0.316665	0.970424			fucI	b2802	-0.196707	0.920349		fucI	b2802	0.222517	0.964932		fucI	b2802	0.142876	0.935115			fucI	b2802	-0.525868	0.862729		fucI	b2802	0.852026	0.456071		fucI	b2802	1.02576	0.9763
fucK	b2803	0.11164	0.975178		fucK	b2803	-0.213342	0.926793		fucK	b2803	-1.31982	0.790609			fucK	b2803	0.590161	0.711288		fucK	b2803	0.504076	0.903624		fucK	b2803	-1.4832	0.497758			fucK	b2803	-0.119972	0.974961		fucK	b2803	-0.26642	0.870531		fucK	b2803	-1.30242	0.983105
fucO	b2799	0.0542751	0.985526		fucO	b2799	0.0307486	0.990989		fucO	b2799	-0.335743	0.970424			fucO	b2799	1.02861	0.422888		fucO	b2799	-0.0549758	0.985162		fucO	b2799	-0.248142	0.892429			fucO	b2799	0.0152188	0.996275		fucO	b2799	-0.133206	0.938999		fucO	b2799	-0.688656	0.984035
fucP	b2801	0.113099	NA		fucP	b2801	-1.36491	NA		fucP	b2801	0.914446	NA			fucP	b2801	1.5532	0.557785		fucP	b2801	-1.22815	NA		fucP	b2801	1.6466	NA			fucP	b2801	1.79789	0.531795		fucP	b2801	-0.245824	NA		fucP	b2801	0.174551	0.990197
fucR	b2805	-0.380102	0.931041		fucR	b2805	-0.646704	0.662961		fucR	b2805	-0.146742	0.98124			fucR	b2805	0.380409	0.827058		fucR	b2805	-0.197532	0.967088		fucR	b2805	1.42474	0.32331			fucR	b2805	-0.0316911	0.994672		fucR	b2805	-0.0685359	0.967615		fucR	b2805	-0.553688	0.986829
fucU	b2804	0.247309	0.959545		fucU	b2804	0.190123	0.940816		fucU	b2804	-0.582852	0.958124			fucU	b2804	1.23127	0.339092		fucU	b2804	-0.0620438	0.984426		fucU	b2804	-1.0459	0.621505			fucU	b2804	0.294705	0.93697		fucU	b2804	0.0299206	0.983346		fucU	b2804	-0.987941	0.984035
fumA	b1612	-0.529615	0.871318		fumA	b1612	-0.909675	0.431861		fumA	b1612	0.0157925	0.996787			fumA	b1612	0.182012	0.919164		fumA	b1612	0.250737	0.96163		fumA	b1612	0.96773	0.413371			fumA	b1612	-0.587053	0.819844		fumA	b1612	-0.271115	0.873952		fumA	b1612	-0.471675	0.986829
fumB	b4122	-0.8217	0.781993		fumB	b4122	0.890592	0.530216		fumB	b4122	-0.578425	0.970424			fumB	b4122	-0.265661	0.895774		fumB	b4122	0.339241	0.943654		fumB	b4122	-1.65883	0.429755			fumB	b4122	-0.212145	0.972574		fumB	b4122	-0.0772953	0.963013		fumB	b4122	-1.128	0.984035
fumC	b1611	0.065359	0.984662		fumC	b1611	-0.361709	0.817784		fumC	b1611	0.818931	0.693566			fumC	b1611	0.009734	0.996808		fumC	b1611	1.71519	0.0328994		fumC	b1611	1.37381	0.169734			fumC	b1611	0.133974	0.973152		fumC	b1611	0.180202	0.90663		fumC	b1611	-0.162982	0.989937
fur	b0683	0.724667	0.477688		fur	b0683	-0.384973	0.65486		fur	b0683	-0.403261	0.867519			fur	b0683	0.466945	0.569411		fur	b0683	0.707389	0.494571		fur	b0683	0.989275	0.129246			fur	b0683	0.620685	0.513369		fur	b0683	0.408156	0.597438		fur	b0683	-0.354715	0.986829
fusA	b3340	-0.214389	0.957396		fusA	b3340	-0.146928	0.940017		fusA	b3340	0.0943353	0.984816			fusA	b3340	-0.565933	0.611211		fusA	b3340	-0.265948	0.943654		fusA	b3340	-0.136695	0.911887			fusA	b3340	-0.429097	0.856177		fusA	b3340	0.74015	0.403012		fusA	b3340	0.43366	0.986829
fxsA	b4140	0.428935	0.954545		fxsA	b4140	0.363342	0.881915		fxsA	b4140	0.0890322	0.991827			fxsA	b4140	-0.0599754	0.982312		fxsA	b4140	-1.1381	0.634242		fxsA	b4140	-0.480412	0.808074			fxsA	b4140	0.520734	0.903754		fxsA	b4140	0.157955	0.938999		fxsA	b4140	0.100295	0.990197
gabD	b2661	1.18499	0.477688		gabD	b2661	1.16066	0.268227		gabD	b2661	0.729963	0.819756			gabD	b2661	1.45709	0.161698		gabD	b2661	1.00263	0.601448		gabD	b2661	0.701604	0.577776			gabD	b2661	0.923188	0.633735		gabD	b2661	-0.675597	0.598625		gabD	b2661	0.515671	0.986829
gabP	b2663	1.91399	0.0664179		gabP	b2663	0.834451	0.544997		gabP	b2663	0.61839	0.897309			gabP	b2663	2.41355	0.00383114		gabP	b2663	0.370396	0.939953		gabP	b2663	0.537556	0.724362			gabP	b2663	1.32247	0.353692		gabP	b2663	-1.58348	0.0984967		gabP	b2663	0.709436	0.984035
gabT	b2662	1.22315	0.42033		gabT	b2662	1.15696	0.240846		gabT	b2662	0.558745	0.897309			gabT	b2662	1.32482	0.193995		gabT	b2662	0.873796	0.68565		gabT	b2662	0.676054	0.57646			gabT	b2662	0.519102	0.843264		gabT	b2662	-0.889162	0.391229		gabT	b2662	0.649731	0.984035
gadA	b3517	-0.0473373	0.984662		gadA	b3517	0.030663	0.98732		gadA	b3517	0.111509	0.98124			gadA	b3517	0.166079	0.905451		gadA	b3517	0.40632	0.900858		gadA	b3517	-0.417664	0.701664			gadA	b3517	0.7283	0.630816		gadA	b3517	-0.0818936	0.953048		gadA	b3517	0.640548	0.983105
gadB	b1493	0.232266	0.952141		gadB	b1493	-0.0942841	0.964628		gadB	b1493	0.121874	0.981107			gadB	b1493	0.234401	0.855551		gadB	b1493	0.454358	0.857282		gadB	b1493	-0.14263	0.899125			gadB	b1493	0.906563	0.37953		gadB	b1493	-0.185907	0.885637		gadB	b1493	0.551372	0.983744
gadC	b1492	0.104062	0.973724		gadC	b1492	-0.535103	0.589497		gadC	b1492	-0.245016	0.970424			gadC	b1492	0.732225	0.423012		gadC	b1492	0.219293	0.953016		gadC	b1492	-0.0754835	0.945601			gadC	b1492	1.15631	0.134806		gadC	b1492	-0.55894	0.529162		gadC	b1492	0.393253	0.986829
gadE	b3512	0.261329	0.957396		gadE	b3512	0.215811	0.918806		gadE	b3512	0.48517	0.914716			gadE	b3512	0.330604	0.842037		gadE	b3512	-0.0933348	0.978051		gadE	b3512	0.985705	0.363197			gadE	b3512	0.403488	0.901788		gadE	b3512	1.16784	0.216842		gadE	b3512	1.30977	0.686913
gadW	b3515	1.27377	0.255505		gadW	b3515	-0.532017	0.662961		gadW	b3515	0.0922857	0.988459			gadW	b3515	1.74066	0.0125159		gadW	b3515	-0.491392	0.869908		gadW	b3515	0.136213	0.919895			gadW	b3515	1.17514	0.238363		gadW	b3515	-0.594464	0.572639		gadW	b3515	0.633029	0.983744
gadX	b3516	1.24557	0.507972		gadX	b3516	-0.412356	0.840662		gadX	b3516	-0.28207	0.972462			gadX	b3516	1.88347	0.0650985		gadX	b3516	-0.728394	0.830326		gadX	b3516	0.0803805	0.962343			gadX	b3516	1.00352	0.647959		gadX	b3516	-0.268002	0.886811		gadX	b3516	-0.181756	0.989937
gadY	b4452	0.668139	0.906545		gadY	b4452	2.07254	0.0945036		gadY	b4452	2.29026	0.0618992			gadY	b4452	1.77386	0.307342		gadY	b4452	-0.93485	0.794701		gadY	b4452	-0.382495	0.84529			gadY	b4452	1.4408	0.515631		gadY	b4452	1.29544	0.343104		gadY	b4452	1.58836	0.82278
galE	b0759	0.359818	0.936378		galE	b0759	-0.232899	0.909092		galE	b0759	0.183351	0.9778			galE	b0759	0.19566	0.908482		galE	b0759	0.00406605	0.998054		galE	b0759	0.171717	0.917065			galE	b0759	0.515264	0.849851		galE	b0759	-0.0235665	0.985244		galE	b0759	-0.399844	0.986829
galK	b0757	-0.0490922	0.98235		galK	b0757	-0.212349	0.85156		galK	b0757	-0.0988769	0.981107			galK	b0757	0.135111	0.895774		galK	b0757	-0.586988	0.592927		galK	b0757	0.164484	0.86049			galK	b0757	0.0710563	0.975724		galK	b0757	-0.475273	0.481577		galK	b0757	-0.0656764	0.990197
galM	b0756	-0.103283	0.96293		galM	b0756	-0.109791	0.924132		galM	b0756	-0.196857	0.958124			galM	b0756	-0.0311271	0.977597		galM	b0756	0.22653	0.916233		galM	b0756	0.180671	0.826771			galM	b0756	-0.339959	0.771528		galM	b0756	-0.245962	0.729116		galM	b0756	-0.0697069	0.990197
galP	b2943	0.160301	0.966713		galP	b2943	0.902474	0.319489		galP	b2943	1.02023	0.490093			galP	b2943	-0.132295	0.930701		galP	b2943	-0.0969238	0.978051		galP	b2943	-0.112965	0.935181			galP	b2943	-0.519374	0.786323		galP	b2943	0.534962	0.608753		galP	b2943	0.101701	0.990197
galR	b2837	-0.163764	0.966907		galR	b2837	-0.726485	0.517126		galR	b2837	-1.20847	0.573438			galR	b2837	-0.31613	0.824404		galR	b2837	-0.135267	0.973423		galR	b2837	-0.485513	0.788562			galR	b2837	-0.41317	0.862729		galR	b2837	0.167352	0.917526		galR	b2837	-0.9898	0.9763
galS	b2151	-0.669626	0.915699		galS	b2151	0.736437	0.785269		galS	b2151	-1.15286	0.889005			galS	b2151	-0.41209	0.883376		galS	b2151	0.276136	0.970465		galS	b2151	-0.706883	0.816582			galS	b2151	-1.14833	0.722141		galS	b2151	0.672844	0.766239		galS	b2151	-2.4707	0.770113
galT	b0758	0.366262	0.932689		galT	b0758	-0.239997	0.906523		galT	b0758	-0.0342287	0.996787			galT	b0758	-0.282301	0.864524		galT	b0758	-0.253839	0.96163		galT	b0758	-0.105354	0.948786			galT	b0758	0.0216828	0.996097		galT	b0758	-0.392728	0.793545		galT	b0758	-0.498565	0.986829
galU	b1236	0.0880464	0.984039		galU	b1236	1.00604	0.428874		galU	b1236	0.187084	0.981107			galU	b1236	0.156854	0.940138		galU	b1236	-1.54161	0.243883		galU	b1236	-1.25404	0.30306			galU	b1236	-0.505411	0.884106		galU	b1236	0.250107	0.894479		galU	b1236	-0.405452	0.986829
gapA	b1779	0.109873	0.968173		gapA	b1779	0.258103	0.802651		gapA	b1779	0.487632	0.754209			gapA	b1779	-0.411021	0.611802		gapA	b1779	0.756591	0.37897		gapA	b1779	0.525419	0.452074			gapA	b1779	-0.326364	0.840144		gapA	b1779	0.681548	0.249229		gapA	b1779	0.110412	0.989937
garD	b3128	-1.05705	0.713861		garD	b3128	0.864684	0.634962		garD	b3128	-0.418726	0.970424			garD	b3128	-0.170512	0.94415		garD	b3128	0.0857369	0.982147		garD	b3128	-0.891401	0.626927			garD	b3128	-1.48696	0.367672		garD	b3128	0.661783	0.689431		garD	b3128	-0.517196	0.986829
garK	b3124	-0.20174	0.957396		garK	b3124	0.425714	0.724367		garK	b3124	-0.241707	0.972462			garK	b3124	0.5374	0.611211		garK	b3124	0.449017	0.867153		garK	b3124	-0.501498	0.727629			garK	b3124	-0.429301	0.806793		garK	b3124	-0.221518	0.848555		garK	b3124	-0.393606	0.986829
garL	b3126	-2.61596	NA		garL	b3126	0.275717	NA		garL	b3126	-1.77005	NA			garL	b3126	-0.877467	0.811536		garL	b3126	0.742195	NA		garL	b3126	-4.21237	NA			garL	b3126	-1.46302	0.738048		garL	b3126	0.116055	NA		garL	b3126	-2.84739	0.9763
garP	b3127	-2.37998	NA		garP	b3127	-0.259868	NA		garP	b3127	0.760974	NA			garP	b3127	-0.485305	NA		garP	b3127	-0.442684	NA		garP	b3127	-0.0224296	NA			garP	b3127	-1.35324	NA		garP	b3127	-0.0299888	NA		garP	b3127	0.00698436	NA
garR	b3125	-0.428289	0.911703		garR	b3125	0.77607	0.554958		garR	b3125	-0.788881	0.873975			garR	b3125	-0.137674	0.940138		garR	b3125	0.192295	0.965947		garR	b3125	-1.46324	0.296817			garR	b3125	-0.614605	0.778548		garR	b3125	0.0405568	0.976768		garR	b3125	-0.646437	0.986829
gatA	b2094	-0.180225	0.982291		gatA	b2094	-2.1037	0.35924		gatA	b2094	-0.46276	0.972462			gatA	b2094	0.0764079	0.984618		gatA	b2094	1.13072	0.893865		gatA	b2094	2.21883	0.340695			gatA	b2094	-0.480848	0.965559		gatA	b2094	2.66784	0.189036		gatA	b2094	-0.68064	0.988407
gatB	b2093	-0.278928	0.974294		gatB	b2093	-1.96508	0.442058		gatB	b2093	-0.513253	0.972462			gatB	b2093	0.5197	0.895774		gatB	b2093	1.13043	0.900858		gatB	b2093	2.75673	0.236277			gatB	b2093	-0.553851	0.956174		gatB	b2093	3.45541	0.0757829		gatB	b2093	-0.736749	0.986829
gatC	b2092	-0.882107	0.906266		gatC	b2092	-1.35485	0.602161		gatC	b2092	-0.56708	0.970424			gatC	b2092	-0.911619	0.775627		gatC	b2092	1.57019	0.730835		gatC	b2092	1.9212	0.385288			gatC	b2092	-1.43051	0.745167		gatC	b2092	3.71653	0.0231749		gatC	b2092	-1.13567	0.984035
gatD	b2091	-0.805132	0.925513		gatD	b2091	-1.27776	0.668458		gatD	b2091	-0.772602	0.958124			gatD	b2091	0.113661	0.979633		gatD	b2091	1.6798	0.730835		gatD	b2091	1.57771	0.540825			gatD	b2091	-0.800646	0.91225		gatD	b2091	3.80579	0.0289816		gatD	b2091	-1.19253	0.984035
gatR	b2087	-0.577453	0.893776		gatR	b2087	-0.847158	0.588379		gatR	b2087	-0.403545	0.970424			gatR	b2087	-0.364084	0.854601		gatR	b2087	0.758898	0.843144		gatR	b2087	1.35846	0.362777			gatR	b2087	-0.796042	0.766868		gatR	b2087	1.34285	0.256841		gatR	b2087	-0.542883	0.986829
gatY	b2096	-0.446668	0.946716		gatY	b2096	-1.2513	0.413269		gatY	b2096	-0.769755	0.897309			gatY	b2096	-0.940909	0.607292		gatY	b2096	0.373224	0.957531		gatY	b2096	0.907508	0.591536			gatY	b2096	-0.767746	0.830194		gatY	b2096	1.74983	0.171993		gatY	b2096	-1.07113	0.983105
gatZ	b2095	-0.880725	0.828293		gatZ	b2095	-1.29779	0.417002		gatZ	b2095	-0.674021	0.933708			gatZ	b2095	-0.563269	0.813211		gatZ	b2095	0.619843	0.916233		gatZ	b2095	1.25797	0.440148			gatZ	b2095	-0.743696	0.853386		gatZ	b2095	2.00894	0.118173		gatZ	b2095	-1.00424	0.984035
gcd	b0124	-0.0437907	0.985463		gcd	b0124	0.242828	0.880308		gcd	b0124	0.226763	0.970424			gcd	b0124	0.522533	0.648979		gcd	b0124	0.57473	0.798847		gcd	b0124	0.431812	0.700136			gcd	b0124	-0.313614	0.911012		gcd	b0124	-0.10833	0.938999		gcd	b0124	0.46197	0.984035
gcl	b0507	-0.180512	0.97305		gcl	b0507	0.0244014	0.994331		gcl	b0507	0.392143	0.970424			gcl	b0507	-0.107523	0.96204		gcl	b0507	-0.395419	0.937985		gcl	b0507	-1.41281	0.282206			gcl	b0507	-0.0830805	0.988008		gcl	b0507	-0.069471	0.970047		gcl	b0507	0.373265	0.989491
gcvA	b2808	0.440459	0.897238		gcvA	b2808	0.261782	0.865736		gcvA	b2808	0.0360422	0.996787			gcvA	b2808	0.119346	0.940138		gcvA	b2808	0.346811	0.918257		gcvA	b2808	-0.0154011	0.992056			gcvA	b2808	0.100993	0.974961		gcvA	b2808	0.0588669	0.963309		gcvA	b2808	-0.314009	0.986829
gcvB	b4443	0.396596	0.967979		gcvB	b4443	2.29908	0.298585		gcvB	b4443	0.8166	0.958124			gcvB	b4443	0.122366	0.979633		gcvB	b4443	-0.905942	0.918257		gcvB	b4443	-2.94436	0.176383			gcvB	b4443	0.225852	0.979327		gcvB	b4443	2.4108	0.247734		gcvB	b4443	-2.30126	0.932115
gcvH	b2904	-0.665711	0.793993		gcvH	b2904	-1.24889	0.157743		gcvH	b2904	-0.311367	0.970424			gcvH	b2904	-1.81537	0.0144422		gcvH	b2904	-0.180124	0.965947		gcvH	b2904	0.663844	0.604124			gcvH	b2904	-1.52549	0.0894268		gcvH	b2904	0.0973526	0.953048		gcvH	b2904	-0.734751	0.983105
gcvP	b2903	-0.61154	0.810131		gcvP	b2903	-1.07669	0.249774		gcvP	b2903	-0.927355	0.596755			gcvP	b2903	-1.62955	0.0390913		gcvP	b2903	-0.229576	0.96163		gcvP	b2903	-0.274691	0.843069			gcvP	b2903	-1.37753	0.161038		gcvP	b2903	-0.324702	0.819288		gcvP	b2903	-1.43505	0.437507
gcvR	b2479	0.535214	0.793993		gcvR	b2479	-0.590192	0.566077		gcvR	b2479	0.172462	0.972462			gcvR	b2479	0.524704	0.607292		gcvR	b2479	-0.598038	0.760983		gcvR	b2479	0.532448	0.644311			gcvR	b2479	0.504352	0.767272		gcvR	b2479	-1.62627	0.00917059		gcvR	b2479	-0.388162	0.986829
gcvT	b2905	-0.515	0.870971		gcvT	b2905	-0.579191	0.6581		gcvT	b2905	-1.09352	0.506879			gcvT	b2905	-1.77579	0.0213167		gcvT	b2905	-0.0667548	0.98135		gcvT	b2905	-0.724686	0.557422			gcvT	b2905	-1.44688	0.132743		gcvT	b2905	0.162554	0.92467		gcvT	b2905	-1.80572	0.145183
gdhA	b1761	0.0192364	0.997114		gdhA	b1761	0.667507	0.428995		gdhA	b1761	0.67432	0.671019			gdhA	b1761	-0.472521	0.640717		gdhA	b1761	0.203087	0.957531		gdhA	b1761	0.811278	0.323504			gdhA	b1761	-0.434248	0.813631		gdhA	b1761	-1.32058	0.0285897		gdhA	b1761	0.0695325	0.990197
gfcA	b0987	0.908225	0.859798		gfcA	b0987	-0.837722	0.662172		gfcA	b0987	-0.14344	0.988459			gfcA	b0987	0.294192	0.905451		gfcA	b0987	-0.361932	0.960345		gfcA	b0987	-0.597662	0.793726			gfcA	b0987	0.872931	0.801231		gfcA	b0987	0.789422	0.663731		gfcA	b0987	1.35484	0.9763
gfcB	b0986	-2.68428	NA		gfcB	b0986	0.30827	NA		gfcB	b0986	-0.449487	NA			gfcB	b0986	-0.650849	NA		gfcB	b0986	-0.228773	NA		gfcB	b0986	-0.958508	NA			gfcB	b0986	0.164206	0.990299		gfcB	b0986	0.790297	NA		gfcB	b0986	-0.374752	0.990197
gfcC	b0985	2.71662	NA		gfcC	b0985	1.54091	NA		gfcC	b0985	1.01256	NA			gfcC	b0985	1.00032	0.739901		gfcC	b0985	0.164715	NA		gfcC	b0985	0.577053	NA			gfcC	b0985	1.99301	0.504038		gfcC	b0985	0.798102	NA		gfcC	b0985	1.36311	0.984035
gfcD	b0984	-0.740616	0.789406		gfcD	b0984	-0.634289	0.645239		gfcD	b0984	-0.23672	0.972653			gfcD	b0984	-0.0237703	0.991658		gfcD	b0984	-0.325015	0.941174		gfcD	b0984	-0.894943	0.557839			gfcD	b0984	0.131159	0.974961		gfcD	b0984	-0.498583	0.696195		gfcD	b0984	0.165163	0.990197
gfcE	b0983	1.23728	0.842926		gfcE	b0983	0.191977	0.964965		gfcE	b0983	-0.448882	0.972462			gfcE	b0983	0.57055	0.847556		gfcE	b0983	0.22529	0.973423		gfcE	b0983	-1.57636	0.537185			gfcE	b0983	-0.140931	0.983935		gfcE	b0983	-0.263383	0.921945		gfcE	b0983	-1.06283	0.986829
ggt	b3447	0.0539769	0.984662		ggt	b3447	0.0323837	0.986988		ggt	b3447	0.824708	0.573438			ggt	b3447	-0.110334	0.940699		ggt	b3447	0.442181	0.874873		ggt	b3447	1.09592	0.178958			ggt	b3447	-0.529669	0.771528		ggt	b3447	-0.310998	0.794172		ggt	b3447	0.221989	0.989782
ghrA	b1033	0.541558	0.798023		ghrA	b1033	-0.111336	0.955654		ghrA	b1033	0.0292521	0.996787			ghrA	b1033	-0.0214794	0.988382		ghrA	b1033	0.580178	0.776425		ghrA	b1033	0.689299	0.540247			ghrA	b1033	0.325073	0.893465		ghrA	b1033	-1.13759	0.0865771		ghrA	b1033	-0.694398	0.9763
ghrB	b3553	-0.449633	0.884907		ghrB	b3553	-0.870051	0.408551		ghrB	b3553	-0.0373211	0.996787			ghrB	b3553	-0.68504	0.563483		ghrB	b3553	-0.161446	0.971213		ghrB	b3553	0.218088	0.881906			ghrB	b3553	-0.0220159	0.995537		ghrB	b3553	-1.48921	0.0602294		ghrB	b3553	-0.648176	0.984035
glcA	b2975	-1.60685	0.211166		glcA	b2975	0.666232	0.688127		glcA	b2975	0.797943	0.834774			glcA	b2975	0.03718	0.985737		glcA	b2975	-0.300927	0.953464		glcA	b2975	-0.432573	0.808074			glcA	b2975	-1.05815	0.502192		glcA	b2975	-0.138792	0.938999		glcA	b2975	1.1114	0.9763
glcB	b2976	-0.447075	0.832032		glcB	b2976	0.914692	0.221003		glcB	b2976	0.559652	0.819756			glcB	b2976	-0.52349	0.596212		glcB	b2976	0.845167	0.499799		glcB	b2976	-0.629783	0.510095			glcB	b2976	-0.860193	0.37953		glcB	b2976	0.817375	0.258912		glcB	b2976	-0.0310776	0.991513
glcC	b2980	-0.236741	0.96293		glcC	b2980	-0.461204	0.793291		glcC	b2980	-0.333439	0.970424			glcC	b2980	0.935617	0.525105		glcC	b2980	0.393833	0.933702		glcC	b2980	0.419808	0.808074			glcC	b2980	-0.372099	0.915197		glcC	b2980	-0.405837	0.794172		glcC	b2980	-0.133497	0.990197
glcD	b2979	-0.28119	0.96293		glcD	b2979	0.168069	0.965898		glcD	b2979	0.350657	0.972462			glcD	b2979	0.766588	0.704518		glcD	b2979	-0.136849	0.978051		glcD	b2979	-3.24727	0.0131377			glcD	b2979	0.762645	0.818152		glcD	b2979	-0.134561	0.955592		glcD	b2979	0.359262	0.989937
glcE	b4468	-1.12157	0.780493		glcE	b4468	0.422307	0.891343		glcE	b4468	-0.677675	0.970424			glcE	b4468	-0.799328	0.72068		glcE	b4468	0.349931	0.96163		glcE	b4468	-3.11168	0.141381			glcE	b4468	-1.04579	0.727367		glcE	b4468	0.356479	0.8788		glcE	b4468	-0.30096	0.990197
glcF	b4467	-0.841819	0.645643		glcF	b4467	0.155179	0.943826		glcF	b4467	0.230894	0.972462			glcF	b4467	-0.0927405	0.955245		glcF	b4467	0.324499	0.936428		glcF	b4467	-0.488459	0.727949			glcF	b4467	-0.761609	0.665007		glcF	b4467	0.410186	0.739808		glcF	b4467	-0.135331	0.990197
glcG	b2977	-0.176378	0.969047		glcG	b2977	0.488832	0.789285		glcG	b2977	0.287954	0.972462			glcG	b2977	0.235811	0.895774		glcG	b2977	1.49598	0.294658		glcG	b2977	-0.717972	0.681341			glcG	b2977	-0.699971	0.750373		glcG	b2977	1.0925	0.306291		glcG	b2977	0.508183	0.986829
gldA	b3945	0.0510838	0.984662		gldA	b3945	-0.107979	0.963965		gldA	b3945	-0.0217152	0.996787			gldA	b3945	-0.478823	0.631705		gldA	b3945	-0.178618	0.964932		gldA	b3945	0.138259	0.935115			gldA	b3945	-0.71584	0.511227		gldA	b3945	0.0181391	0.98593		gldA	b3945	-0.436631	0.986829
glf	b2036	0.531075	0.899307		glf	b2036	-0.113552	0.965898		glf	b2036	-0.00149646	0.99923			glf	b2036	0.953835	0.510873		glf	b2036	-1.65945	0.183063		glf	b2036	-0.575878	0.723679			glf	b2036	0.248475	0.964296		glf	b2036	-0.195807	0.923607		glf	b2036	-0.434319	0.986829
glgA	b3429	-0.479094	0.851008		glgA	b3429	-0.252612	0.88147		glgA	b3429	0.0342075	0.996787			glgA	b3429	0.218385	0.889838		glgA	b3429	0.316076	0.932305		glgA	b3429	0.250086	0.843069			glgA	b3429	-0.0373684	0.992717		glgA	b3429	0.2876	0.830588		glgA	b3429	0.760336	0.9763
glgB	b3432	0.330412	0.895328		glgB	b3432	-0.736067	0.309143		glgB	b3432	0.0663006	0.988459			glgB	b3432	0.495463	0.594222		glgB	b3432	0.188313	0.957531		glgB	b3432	0.201748	0.843069			glgB	b3432	0.354697	0.856177		glgB	b3432	-0.480492	0.565726		glgB	b3432	0.23186	0.986829
glgC	b3430	-0.0786748	0.977239		glgC	b3430	-0.176546	0.926571		glgC	b3430	-0.173164	0.972653			glgC	b3430	0.706529	0.522135		glgC	b3430	0.203725	0.962995		glgC	b3430	-0.440716	0.709292			glgC	b3430	0.271807	0.930294		glgC	b3430	-0.0382167	0.975887		glgC	b3430	-0.0154616	0.995884
glgP	b3428	0.132845	0.96293		glgP	b3428	-0.663244	0.354839		glgP	b3428	-0.265673	0.957842			glgP	b3428	0.737411	0.331201		glgP	b3428	0.0569755	0.978051		glgP	b3428	0.29603	0.758418			glgP	b3428	0.379281	0.830194		glgP	b3428	0.084993	0.939204		glgP	b3428	0.39504	0.984035
glgS	b3049	0.407569	0.957396		glgS	b3049	0.548747	0.830825		glgS	b3049	0.33999	0.972462			glgS	b3049	1.40409	0.490116		glgS	b3049	-1.26852	0.684071		glgS	b3049	-0.910308	0.618381			glgS	b3049	1.00839	0.771528		glgS	b3049	0.0981489	0.964945		glgS	b3049	0.158983	0.990197
glgX	b3431	0.234094	0.920404		glgX	b3431	-0.67633	0.277174		glgX	b3431	-0.00491335	0.998267			glgX	b3431	0.517636	0.50708		glgX	b3431	0.0851719	0.973797		glgX	b3431	0.19296	0.837552			glgX	b3431	0.283988	0.875613		glgX	b3431	-0.0987949	0.930907		glgX	b3431	0.432429	0.984035
glk	b2388	-0.234333	0.956579		glk	b2388	0.509659	0.664654		glk	b2388	-0.603171	0.829815			glk	b2388	-0.0744492	0.963756		glk	b2388	-0.611469	0.76579		glk	b2388	-1.13428	0.206043			glk	b2388	-0.35184	0.895757		glk	b2388	1.0471	0.176641		glk	b2388	-0.718918	0.9763
glmM	b3176	-0.0282054	0.984662		glmM	b3176	-0.0290255	0.983103		glmM	b3176	0.0948869	0.972996			glmM	b3176	-0.454756	0.394986		glmM	b3176	-0.161079	0.937985		glmM	b3176	-0.172896	0.819282			glmM	b3176	-0.304272	0.766868		glmM	b3176	-0.104816	0.893012		glmM	b3176	-0.205499	0.986829
glmS	b3729	-0.495126	0.645643		glmS	b3729	-0.0654299	0.965799		glmS	b3729	-0.0870942	0.981107			glmS	b3729	0.0442394	0.968254		glmS	b3729	0.0442707	0.978051		glmS	b3729	-0.343519	0.64592			glmS	b3729	-0.310752	0.830194		glmS	b3729	0.125886	0.894021		glmS	b3729	0.415948	0.983744
glmU	b3730	-0.138819	0.957026		glmU	b3730	0.378827	0.573014		glmU	b3730	0.0639373	0.98145			glmU	b3730	-0.0174863	0.985737		glmU	b3730	-0.260183	0.900858		glmU	b3730	-0.116327	0.882651			glmU	b3730	-0.423639	0.687793		glmU	b3730	0.121688	0.888643		glmU	b3730	0.110105	0.989937
glmY	b4441	0.070496	0.984662		glmY	b4441	-1.01608	0.420239		glmY	b4441	0.279898	0.972462			glmY	b4441	1.18986	0.363917		glmY	b4441	-0.871507	0.744762		glmY	b4441	1.83591	0.0792974			glmY	b4441	0.59803	0.842214		glmY	b4441	2.8291	0.000540477		glmY	b4441	0.957958	0.9763
glmZ	b4456	0.886543	0.555289		glmZ	b4456	-0.904972	0.309264		glmZ	b4456	-0.606986	0.819756			glmZ	b4456	1.53805	0.0345632		glmZ	b4456	-0.70485	0.708564		glmZ	b4456	1.14851	0.198937			glmZ	b4456	1.09451	0.292126		glmZ	b4456	0.445258	0.69557		glmZ	b4456	0.29773	0.986829
glnA	b3870	3.64307	4.92184e-06		glnA	b3870	1.2225	0.343171		glnA	b3870	2.82096	0.00138647			glnA	b3870	3.07706	0.000396831		glnA	b3870	0.321016	0.957531		glnA	b3870	1.72357	0.141498			glnA	b3870	3.25184	5.9507e-05		glnA	b3870	-0.989438	0.469518		glnA	b3870	0.393695	0.986829
glnB	b2553	0.435576	0.839443		glnB	b2553	-0.565559	0.563311		glnB	b2553	-0.689172	0.787253			glnB	b2553	-0.0475112	0.976604		glnB	b2553	-0.370481	0.903624		glnB	b2553	-0.223154	0.874801			glnB	b2553	0.283634	0.903754		glnB	b2553	-0.0169842	0.98593		glnB	b2553	-0.635935	0.984035
glnD	b0167	0.647336	0.638333		glnD	b0167	0.35472	0.735793		glnD	b0167	0.723999	0.58014			glnD	b0167	0.547235	0.553717		glnD	b0167	-0.0770567	0.978051		glnD	b0167	0.0765848	0.942382			glnD	b0167	1.22546	0.0457636		glnD	b0167	-0.673161	0.338005		glnD	b0167	0.290949	0.986829
glnE	b3053	-0.376907	0.793993		glnE	b3053	0.1391	0.900393		glnE	b3053	0.136493	0.972462			glnE	b3053	-0.340519	0.654602		glnE	b3053	0.217185	0.928231		glnE	b3053	0.246519	0.780358			glnE	b3053	-0.287399	0.842214		glnE	b3053	-0.313703	0.667878		glnE	b3053	0.192894	0.986829
glnG	b3868	3.23278	0.000244957		glnG	b3868	0.971566	0.540648		glnG	b3868	1.71142	0.25452			glnG	b3868	2.99662	0.000981788		glnG	b3868	-0.345112	0.957531		glnG	b3868	0.856125	0.586236			glnG	b3868	3.20174	0.000169024		glnG	b3868	-1.37612	0.265205		glnG	b3868	0.530074	0.986829
glnH	b0811	2.71542	0.00356416		glnH	b0811	1.30672	0.30634		glnH	b0811	2.52017	0.010178			glnH	b0811	2.71581	0.00333872		glnH	b0811	0.515873	0.918257		glnH	b0811	2.4757	0.0173642			glnH	b0811	2.74255	0.00223111		glnH	b0811	-0.802309	0.598625		glnH	b0811	0.307628	0.989937
glnK	b0450	8.07394	1.09522e-05		glnK	b0450	5.10839	0.0130891		glnK	b0450	5.35727	0.011041			glnK	b0450	7.88532	1.06645e-05		glnK	b0450	0.393644	0.971858		glnK	b0450	2.40996	0.413371			glnK	b0450	9.81219	9.13808e-09		glnK	b0450	-1.56638	0.6431		glnK	b0450	0.407705	0.989937
glnL	b3869	2.68186	0.0033232		glnL	b3869	1.32705	0.280555		glnL	b3869	2.17394	0.0371836			glnL	b3869	2.96205	0.000536139		glnL	b3869	-0.247949	0.964932		glnL	b3869	1.60569	0.198937			glnL	b3869	3.05718	0.000162746		glnL	b3869	-1.02249	0.439264		glnL	b3869	0.629282	0.986829
glnP	b0810	3.19905	7.84059e-05		glnP	b0810	1.54595	0.157743		glnP	b0810	2.2779	0.0147503			glnP	b0810	3.35397	1.73313e-05		glnP	b0810	0.522057	0.91019		glnP	b0810	1.89446	0.0834783			glnP	b0810	3.27051	1.39455e-05		glnP	b0810	-0.817015	0.544071		glnP	b0810	0.323033	0.989782
glnQ	b0809	2.44267	0.0258011		glnQ	b0809	1.62375	0.200993		glnQ	b0809	2.35822	0.0330978			glnQ	b0809	2.1787	0.0525407		glnQ	b0809	1.02695	0.725216		glnQ	b0809	2.29997	0.0555625			glnQ	b0809	2.40966	0.0263832		glnQ	b0809	-0.0357403	0.984442		glnQ	b0809	0.553212	0.986829
glnS	b0680	0.0164028	0.997717		glnS	b0680	0.0236563	0.990179		glnS	b0680	0.105919	0.98124			glnS	b0680	-0.462748	0.658091		glnS	b0680	-0.420537	0.869908		glnS	b0680	0.0496147	0.966519			glnS	b0680	0.110856	0.973152		glnS	b0680	-0.162313	0.898254		glnS	b0680	0.130631	0.989937
glnU	b0670	-0.491416	0.897238		glnU	b0670	0.253609	0.902124		glnU	b0670	-0.303924	0.970424			glnU	b0670	-0.799054	0.564244		glnU	b0670	-0.112738	0.978051		glnU	b0670	-1.40459	0.205716			glnU	b0670	0.115382	0.97697		glnU	b0670	1.67122	0.0623721		glnU	b0670	-0.229562	0.989937
glnV	b0665	0.0271617	0.997717		glnV	b0665	-0.743994	0.65841		glnV	b0665	-0.813488	0.851284			glnV	b0665	0.77647	0.650718		glnV	b0665	-0.963688	0.723752		glnV	b0665	-1.25192	0.364001			glnV	b0665	1.08131	0.647959		glnV	b0665	1.93616	0.0627374		glnV	b0665	0.251405	0.989937
glnW	b0668	-0.609722	0.832032		glnW	b0668	0.0583158	0.983436		glnW	b0668	-0.260779	0.972462			glnW	b0668	-1.11959	0.340349		glnW	b0668	-0.430156	0.918257		glnW	b0668	-0.912082	0.492361			glnW	b0668	0.0521756	0.9923		glnW	b0668	1.29658	0.189036		glnW	b0668	0.190822	0.989937
glnX	b0664	0.357451	0.952899		glnX	b0664	-1.03215	0.400441		glnX	b0664	-1.36991	0.538482			glnX	b0664	0.849089	0.588866		glnX	b0664	-0.695206	0.83933		glnX	b0664	-1.08589	0.484761			glnX	b0664	0.741132	0.778548		glnX	b0664	2.3907	0.00925754		glnX	b0664	-0.458351	0.986829
gloA	b1651	0.738585	0.675248		gloA	b1651	0.22282	0.898677		gloA	b1651	0.228353	0.972462			gloA	b1651	0.520399	0.65587		gloA	b1651	-0.123177	0.973619		gloA	b1651	0.255834	0.854755			gloA	b1651	0.115409	0.973152		gloA	b1651	-0.912825	0.284809		gloA	b1651	-0.137392	0.990197
gloB	b0212	1.01028	0.507972		gloB	b0212	-0.0885587	0.965898		gloB	b0212	0.711264	0.766132			gloB	b0212	0.854011	0.414442		gloB	b0212	-0.657551	0.751169		gloB	b0212	0.261377	0.851599			gloB	b0212	0.658828	0.712383		gloB	b0212	-0.463049	0.678357		gloB	b0212	-0.0153048	0.995884
glpA	b2241	2.91329	0.021368		glpA	b2241	2.44267	0.0321998		glpA	b2241	2.66236	0.0114002			glpA	b2241	-1.12446	0.481048		glpA	b2241	0.575941	0.916205		glpA	b2241	0.915497	0.577231			glpA	b2241	1.58408	0.32451		glpA	b2241	0.492115	0.797561		glpA	b2241	-1.1552	0.9763
glpB	b2242	2.99047	0.0793122		glpB	b2242	2.13543	0.12425		glpB	b2242	2.26494	0.098957			glpB	b2242	-1.34083	0.414442		glpB	b2242	1.48611	0.557289		glpB	b2242	1.70551	0.295067			glpB	b2242	1.13422	0.689208		glpB	b2242	0.794004	0.662788		glpB	b2242	-1.16621	0.9763
glpC	b2243	1.68616	0.584045		glpC	b2243	0.89858	0.656961		glpC	b2243	1.38241	0.596755			glpC	b2243	-1.08761	0.553644		glpC	b2243	0.546364	0.928231		glpC	b2243	1.58591	0.355324			glpC	b2243	1.1587	0.689208		glpC	b2243	0.12159	0.959627		glpC	b2243	-0.918179	0.984035
glpD	b3426	4.66563	1.49425e-16		glpD	b3426	3.01315	3.94042e-06		glpD	b3426	3.39621	2.56491e-08			glpD	b3426	-0.168075	0.919312		glpD	b3426	3.22902	5.61365e-07		glpD	b3426	2.83628	1.59733e-05			glpD	b3426	2.76319	7.44552e-06		glpD	b3426	-0.721898	0.51144		glpD	b3426	0.0816685	0.990197
glpE	b3425	0.870549	0.747386		glpE	b3425	0.77189	0.592807		glpE	b3425	0.773394	0.851284			glpE	b3425	0.00423115	0.99934		glpE	b3425	1.15409	0.553445		glpE	b3425	1.30809	0.384251			glpE	b3425	0.908583	0.665007		glpE	b3425	-0.477434	0.744557		glpE	b3425	-0.400581	0.986829
glpF	b3927	2.90648	0.0033232		glpF	b3927	1.76384	0.124726		glpF	b3927	1.95046	0.0975217			glpF	b3927	-0.368945	0.856657		glpF	b3927	3.11466	0.00123258		glpF	b3927	2.22885	0.0456566			glpF	b3927	0.586072	0.870463		glpF	b3927	0.932039	0.516073		glpF	b3927	-1.13975	0.9763
glpG	b3424	0.186438	0.96293		glpG	b3424	1.1702	0.140404		glpG	b3424	0.795949	0.66846			glpG	b3424	-0.0996208	0.950778		glpG	b3424	0.403162	0.903624		glpG	b3424	0.204974	0.876746			glpG	b3424	-0.102774	0.975726		glpG	b3424	0.107874	0.938999		glpG	b3424	0.171945	0.989937
glpK	b3926	2.98015	0.000787026		glpK	b3926	1.73826	0.122797		glpK	b3926	1.74726	0.180081			glpK	b3926	-1.29636	0.359115		glpK	b3926	3.59407	4.33497e-05		glpK	b3926	2.80458	0.00493991			glpK	b3926	0.133391	0.97697		glpK	b3926	1.47356	0.201025		glpK	b3926	-1.08773	0.9763
glpQ	b2239	0.797716	0.740526		glpQ	b2239	0.693807	0.609318		glpQ	b2239	0.926847	0.665815			glpQ	b2239	-1.17701	0.283617		glpQ	b2239	0.276212	0.957531		glpQ	b2239	0.942425	0.430972			glpQ	b2239	-0.0848857	0.985559		glpQ	b2239	0.228928	0.894104		glpQ	b2239	-0.983087	0.973857
glpR	b3423	-0.00394763	0.999441		glpR	b3423	0.634821	0.428995		glpR	b3423	0.208447	0.972462			glpR	b3423	-0.118124	0.929568		glpR	b3423	1.06463	0.183063		glpR	b3423	0.297779	0.826771			glpR	b3423	0.121589	0.973152		glpR	b3423	0.427028	0.622101		glpR	b3423	0.254464	0.989491
glpT	b2240	0.666733	0.899307		glpT	b2240	1.6859	0.254324		glpT	b2240	1.43742	0.58014			glpT	b2240	-1.47727	0.364544		glpT	b2240	1.28367	0.68562		glpT	b2240	1.39997	0.39632			glpT	b2240	-0.397474	0.943329		glpT	b2240	0.529356	0.802889		glpT	b2240	-1.68329	0.82278
glpX	b3925	0.396032	0.917957		glpX	b3925	0.538306	0.717374		glpX	b3925	0.892919	0.685534			glpX	b3925	-0.771061	0.560846		glpX	b3925	0.929548	0.652156		glpX	b3925	0.644086	0.619528			glpX	b3925	-0.15042	0.973152		glpX	b3925	0.897354	0.395816		glpX	b3925	-0.759366	0.983105
glrK	b2556	-0.0679766	0.974294		glrK	b2556	0.183967	0.870556		glrK	b2556	0.0496636	0.990431			glrK	b2556	0.570499	0.433999		glrK	b2556	0.0554376	0.978051		glrK	b2556	0.359337	0.672125			glrK	b2556	0.452016	0.722141		glrK	b2556	0.248848	0.767587		glrK	b2556	0.427183	0.984035
glrR	b2554	0.367544	0.902536		glrR	b2554	-0.279715	0.86142		glrR	b2554	0.513052	0.894723			glrR	b2554	0.0325022	0.983324		glrR	b2554	-0.418174	0.900858		glrR	b2554	0.249446	0.854294			glrR	b2554	0.183001	0.960546		glrR	b2554	-0.438703	0.683418		glrR	b2554	0.470951	0.986829
glsA	b0485	-0.199143	0.96293		glsA	b0485	0.357891	0.845231		glsA	b0485	0.419166	0.947311			glsA	b0485	0.32732	0.846512		glsA	b0485	0.383501	0.928231		glsA	b0485	-0.184302	0.899709			glsA	b0485	0.372656	0.91225		glsA	b0485	0.307876	0.843738		glsA	b0485	0.969342	0.973857
glsB	b1524	-0.374513	0.899307		glsB	b1524	0.394123	0.766306		glsB	b1524	0.0506085	0.992581			glsB	b1524	-1.03504	0.196033		glsB	b1524	0.0446759	0.985162		glsB	b1524	0.30084	0.843069			glsB	b1524	0.11134	0.973152		glsB	b1524	-0.232912	0.855243		glsB	b1524	-0.0273167	0.991522
gltA	b0720	0.22531	0.957396		gltA	b0720	-0.0285503	0.990179		gltA	b0720	0.0435871	0.99551			gltA	b0720	0.143377	0.929568		gltA	b0720	0.239114	0.957531		gltA	b0720	0.996405	0.289372			gltA	b0720	-0.0154795	0.996275		gltA	b0720	-1.18815	0.135487		gltA	b0720	-0.492754	0.984035
gltB	b3212	0.662259	0.668017		gltB	b3212	0.185939	0.901766		gltB	b3212	0.72214	0.626087			gltB	b3212	0.0929561	0.946352		gltB	b3212	1.16224	0.169483		gltB	b3212	1.12809	0.12277			gltB	b3212	0.576942	0.722141		gltB	b3212	-0.317256	0.778797		gltB	b3212	-0.151099	0.989937
gltD	b3213	0.3612	0.906545		gltD	b3213	0.0111706	0.994331		gltD	b3213	0.460571	0.902741			gltD	b3213	-0.325526	0.812257		gltD	b3213	1.23628	0.182015		gltD	b3213	0.964464	0.270539			gltD	b3213	0.229709	0.943329		gltD	b3213	-0.0287338	0.980898		gltD	b3213	-0.0393839	0.990561
gltF	b3214	0.981677	NA		gltF	b3214	1.14005	NA		gltF	b3214	-2.60357	NA			gltF	b3214	0.740516	0.79733		gltF	b3214	-1.03441	NA		gltF	b3214	-2.43456	NA			gltF	b3214	0.906913	0.830194		gltF	b3214	0.0074691	NA		gltF	b3214	-1.93069	0.984035
gltI	b0655	1.50346	0.187461		gltI	b0655	1.24037	0.205814		gltI	b0655	1.35779	0.245651			gltI	b0655	1.76318	0.035495		gltI	b0655	0.379257	0.928859		gltI	b0655	1.45792	0.13678			gltI	b0655	1.48238	0.156067		gltI	b0655	-1.13799	0.236828		gltI	b0655	0.16914	0.989937
gltJ	b0654	1.4123	0.260957		gltJ	b0654	0.501925	0.728712		gltJ	b0654	0.707312	0.851284			gltJ	b0654	1.46202	0.0994093		gltJ	b0654	0.618831	0.833877		gltJ	b0654	1.00132	0.484761			gltJ	b0654	1.1394	0.323423		gltJ	b0654	-0.563196	0.641137		gltJ	b0654	-0.684355	0.984035
gltK	b0653	1.85945	0.128204		gltK	b0653	-0.105611	0.967304		gltK	b0653	1.62468	0.25452			gltK	b0653	1.74821	0.0786713		gltK	b0653	0.266109	0.962995		gltK	b0653	1.06986	0.501724			gltK	b0653	1.49256	0.17686		gltK	b0653	-1.50815	0.112294		gltK	b0653	-0.646879	0.986829
gltL	b0652	1.69497	0.0196735		gltL	b0652	-0.0554297	0.982373		gltL	b0652	0.918241	0.596755			gltL	b0652	1.73888	0.00412506		gltL	b0652	0.383903	0.909881		gltL	b0652	0.660675	0.618381			gltL	b0652	1.30247	0.0457636		gltL	b0652	-1.22943	0.0641473		gltL	b0652	-0.446558	0.986829
gltP	b4077	-0.110268	0.974294		gltP	b4077	-0.706757	0.523756		gltP	b4077	-0.512994	0.903221			gltP	b4077	-0.837143	0.414442		gltP	b4077	-0.312386	0.937985		gltP	b4077	0.233112	0.881151			gltP	b4077	-0.475697	0.830194		gltP	b4077	-0.137329	0.931489		gltP	b4077	-0.622531	0.984035
gltS	b3653	-0.305442	0.893884		gltS	b3653	-0.467592	0.578721		gltS	b3653	-0.445831	0.855561			gltS	b3653	-0.342785	0.703049		gltS	b3653	0.185241	0.955878		gltS	b3653	-0.123786	0.910853			gltS	b3653	0.0925717	0.973152		gltS	b3653	-0.388268	0.640273		gltS	b3653	-0.470311	0.984035
gltT	b3969	0.460581	0.893776		gltT	b3969	-0.581447	0.66274		gltT	b3969	0.645185	0.851284			gltT	b3969	-0.483584	0.7268		gltT	b3969	0.340702	0.937985		gltT	b3969	0.149421	0.920977			gltT	b3969	0.0271639	0.994993		gltT	b3969	1.80328	0.0231749		gltT	b3969	1.00763	0.961473
gltU	b3757	1.16074	0.645643		gltU	b3757	0.112964	0.970443		gltU	b3757	0.868243	0.851284			gltU	b3757	-0.410424	0.847556		gltU	b3757	0.112609	0.978051		gltU	b3757	-0.0837889	0.966519			gltU	b3757	-0.036796	0.994993		gltU	b3757	2.08121	0.0552721		gltU	b3757	0.552236	0.986829
gltV	b4008	1.01422	0.664386		gltV	b4008	0.124972	0.965898		gltV	b4008	1.04357	0.677699			gltV	b4008	-0.397416	0.837882		gltV	b4008	0.182729	0.971858		gltV	b4008	0.515357	0.763013			gltV	b4008	-0.266727	0.962025		gltV	b4008	2.25246	0.0148312		gltV	b4008	0.724246	0.984035
gltW	b2590	0.811249	0.64271		gltW	b2590	-0.260871	0.88147		gltW	b2590	0.35966	0.957842			gltW	b2590	-0.222836	0.883376		gltW	b2590	0.330396	0.931415		gltW	b2590	-0.158933	0.912827			gltW	b2590	0.235314	0.943329		gltW	b2590	1.68768	0.0227002		gltW	b2590	0.994203	0.959079
gltX	b2400	-0.0904135	0.97305		gltX	b2400	0.389822	0.644044		gltX	b2400	-0.0189356	0.996787			gltX	b2400	-0.773515	0.239561		gltX	b2400	-0.254292	0.918257		gltX	b2400	-0.537196	0.460054			gltX	b2400	-0.633274	0.499912		gltX	b2400	0.377465	0.629236		gltX	b2400	-0.0267467	0.990946
gluQ	b0144	0.0127066	0.997717		gluQ	b0144	-0.233922	0.840146		gluQ	b0144	-0.220695	0.970424			gluQ	b0144	1.11341	0.0345632		gluQ	b0144	-0.551921	0.688413		gluQ	b0144	0.0483153	0.966519			gluQ	b0144	0.288987	0.861689		gluQ	b0144	0.292623	0.734485		gluQ	b0144	0.652833	0.9763
glvC	b3683	-0.108095	NA		glvC	b3683	0.0611051	NA		glvC	b3683	0.662768	NA			glvC	b3683	1.7514	0.464637		glvC	b3683	0.589932	0.928231		glvC	b3683	0.117022	NA			glvC	b3683	0.133164	0.983058		glvC	b3683	0.249517	NA		glvC	b3683	0.629568	0.986829
glvG	b3681	0.305361	0.96293		glvG	b3681	0.672425	0.789561		glvG	b3681	-0.0374504	0.996787			glvG	b3681	1.28497	0.499941		glvG	b3681	-0.0177499	0.997361		glvG	b3681	-1.02989	0.758036			glvG	b3681	0.718261	0.830194		glvG	b3681	0.414504	0.845175		glvG	b3681	-1.23893	0.984035
glxK	b0514	-1.53519	0.128204		glxK	b0514	0.0447689	0.98732		glxK	b0514	0.2085	0.981107			glxK	b0514	-0.571135	0.67906		glxK	b0514	-0.535925	0.903624		glxK	b0514	-1.19788	0.457252			glxK	b0514	-1.14549	0.346509		glxK	b0514	-0.405762	0.801865		glxK	b0514	0.290359	0.989937
glxR	b0509	0.0580939	NA		glxR	b0509	1.61134	NA		glxR	b0509	-0.803598	NA			glxR	b0509	0.0124294	0.998781		glxR	b0509	-1.95431	NA		glxR	b0509	-2.4016	NA			glxR	b0509	-0.356021	0.973152		glxR	b0509	-0.977849	NA		glxR	b0509	0.449776	0.989937
glyA	b2551	-0.558089	0.793993		glyA	b2551	-0.890894	0.292626		glyA	b2551	-0.194301	0.972462			glyA	b2551	-1.54794	0.0213167		glyA	b2551	0.758043	0.660057		glyA	b2551	0.577161	0.575107			glyA	b2551	-0.434192	0.847846		glyA	b2551	-0.0586574	0.964537		glyA	b2551	-0.512289	0.984035
glyQ	b3560	-0.507732	0.816292		glyQ	b3560	0.644571	0.497628		glyQ	b3560	0.901483	0.470715			glyQ	b3560	-0.1668	0.902564		glyQ	b3560	0.0426137	0.985162		glyQ	b3560	0.557217	0.575107			glyQ	b3560	-0.801066	0.502192		glyQ	b3560	0.229755	0.853314		glyQ	b3560	0.424512	0.986829
glyS	b3559	-0.10101	0.969192		glyS	b3559	0.156309	0.899178		glyS	b3559	0.49521	0.771918			glyS	b3559	-0.271692	0.789908		glyS	b3559	-0.142318	0.964701		glyS	b3559	0.261726	0.774587			glyS	b3559	-0.438583	0.754025		glyS	b3559	0.207196	0.830749		glyS	b3559	0.295623	0.986829
glyT	b3978	-0.931344	0.646448		glyT	b3978	0.23518	0.913593		glyT	b3978	0.319285	0.970424			glyT	b3978	-1.45009	0.167326		glyT	b3978	0.551228	0.893865		glyT	b3978	-1.0317	0.395548			glyT	b3978	-0.303407	0.943329		glyT	b3978	1.87831	0.0285897		glyT	b3978	0.85883	0.983105
glyU	b2864	-0.589965	NA		glyU	b2864	-0.847502	NA		glyU	b2864	1.92613	NA			glyU	b2864	2.02854	NA		glyU	b2864	0.973984	NA		glyU	b2864	1.51369	NA			glyU	b2864	4.81636	0.0928939		glyU	b2864	0.300988	NA		glyU	b2864	0.854859	0.986829
glyV	b4163	0.0514408	0.985526		glyV	b4163	-0.721852	0.585593		glyV	b4163	-1.06838	0.573438			glyV	b4163	-0.448295	0.788292		glyV	b4163	-0.976165	0.610552		glyV	b4163	-0.383643	0.800142			glyV	b4163	0.19573	0.973152		glyV	b4163	0.975606	0.355157		glyV	b4163	-0.453683	0.986829
glyW	b1911	0.0146659	0.997717		glyW	b1911	-0.449831	0.886553		glyW	b1911	-1.65581	0.573438			glyW	b1911	-0.0132767	0.997249		glyW	b1911	-0.398975	0.96163		glyW	b1911	-1.32058	0.486297			glyW	b1911	0.0613966	0.994427		glyW	b1911	1.58888	0.326703		glyW	b1911	-1.47165	0.9763
glyX	b4164	-0.630119	0.832032		glyX	b4164	-0.627069	0.668742		glyX	b4164	-0.739399	0.851284			glyX	b4164	-0.699408	0.611211		glyX	b4164	-0.301093	0.953016		glyX	b4164	-0.567166	0.717204			glyX	b4164	0.115418	0.97697		glyX	b4164	1.18024	0.249229		glyX	b4164	0.159511	0.990197
glyY	b4165	-0.999566	0.651839		glyY	b4165	-0.697388	0.663215		glyY	b4165	-0.999631	0.817497			glyY	b4165	-0.29025	0.883376		glyY	b4165	-0.181794	0.971858		glyY	b4165	-0.701678	0.729756			glyY	b4165	-0.172646	0.973152		glyY	b4165	1.32997	0.23891		glyY	b4165	0.357277	0.989937
gmd	b2053	0.648667	0.870971		gmd	b2053	-2.86826	0.0140581		gmd	b2053	-1.29048	0.671019			gmd	b2053	0.605058	0.737378		gmd	b2053	-3.70064	0.00123258		gmd	b2053	-0.6825	0.749255			gmd	b2053	1.03159	0.655345		gmd	b2053	-2.49809	0.0444776		gmd	b2053	0.356362	0.989937
gmhA	b0222	0.0500864	0.975754		gmhA	b0222	-0.0909043	0.944627		gmhA	b0222	-0.126189	0.972462			gmhA	b0222	-0.0339934	0.976668		gmhA	b0222	-0.0620623	0.978051		gmhA	b0222	0.615391	0.35124			gmhA	b0222	0.31739	0.801231		gmhA	b0222	-0.299178	0.665284		gmhA	b0222	-0.104343	0.989937
gmhB	b0200	-0.212666	0.957396		gmhB	b0200	0.0376351	0.986988		gmhB	b0200	-0.492783	0.903221			gmhB	b0200	-0.274931	0.844891		gmhB	b0200	0.304056	0.937985		gmhB	b0200	0.673244	0.616912			gmhB	b0200	0.118468	0.973152		gmhB	b0200	-0.0363317	0.976678		gmhB	b0200	-0.533438	0.986829
gmk	b3648	0.441705	0.575589		gmk	b3648	-0.266692	0.65486		gmk	b3648	-0.231656	0.903221			gmk	b3648	0.434178	0.394092		gmk	b3648	-0.119929	0.956796		gmk	b3648	0.0523038	0.938015			gmk	b3648	0.60747	0.187522		gmk	b3648	0.149949	0.818678		gmk	b3648	-0.236338	0.986829
gmr	b1285	-0.537075	0.793993		gmr	b1285	0.527517	0.647202		gmr	b1285	0.552805	0.851284			gmr	b1285	0.253134	0.847556		gmr	b1285	-0.218395	0.957531		gmr	b1285	0.00652149	0.995415			gmr	b1285	-0.534472	0.761108		gmr	b1285	-0.645915	0.479969		gmr	b1285	0.453815	0.986829
gnd	b2029	0.255441	0.935965		gnd	b2029	-0.226525	0.867514		gnd	b2029	0.132373	0.973851			gnd	b2029	-0.745932	0.364132		gnd	b2029	-0.126835	0.968911		gnd	b2029	0.243202	0.819399			gnd	b2029	-0.529003	0.723007		gnd	b2029	-0.207781	0.855716		gnd	b2029	-0.121305	0.989937
gnsA	b4517	0.0490296	NA		gnsA	b4517	-3.45824	NA		gnsA	b4517	0.34786	NA			gnsA	b4517	4.38462	NA		gnsA	b4517	-0.822396	NA		gnsA	b4517	0.995687	NA			gnsA	b4517	1.60385	NA		gnsA	b4517	-2.05887	NA		gnsA	b4517	1.25416	NA
gnsB	b1550	0.507882	NA		gnsB	b1550	0.911347	NA		gnsB	b1550	-0.885474	NA			gnsB	b1550	3.94409	0.322766		gnsB	b1550	-2.14603	NA		gnsB	b1550	-2.86138	NA			gnsB	b1550	1.57261	0.806793		gnsB	b1550	0.761814	NA		gnsB	b1550	-3.58027	0.897248
gntK	b3437	0.202654	0.973724		gntK	b3437	0.898514	0.66721		gntK	b3437	0.060381	0.996787			gntK	b3437	0.0482357	0.985737		gntK	b3437	0.149142	0.978051		gntK	b3437	0.492955	0.843069			gntK	b3437	0.177438	0.974961		gntK	b3437	1.41677	0.33432		gntK	b3437	-1.17463	0.983105
gntP	b4321	-0.857243	0.808098		gntP	b4321	0.52158	0.830825		gntP	b4321	-1.20962	0.897309			gntP	b4321	-0.72536	0.681145		gntP	b4321	-0.53505	0.916205		gntP	b4321	-1.48947	0.591536			gntP	b4321	-0.597277	0.862729		gntP	b4321	0.319463	0.876976		gntP	b4321	-0.585448	0.989937
gntR	b3438	-0.0434132	0.985463		gntR	b3438	-0.300419	0.840662		gntR	b3438	-0.583212	0.851284			gntR	b3438	0.17399	0.901935		gntR	b3438	-0.333911	0.920029		gntR	b3438	-0.601207	0.604392			gntR	b3438	0.07902	0.98181		gntR	b3438	-0.0320725	0.978995		gntR	b3438	-0.444815	0.986829
gntT	b3415	-0.349135	0.906545		gntT	b3415	0.423825	0.717374		gntT	b3415	-0.237942	0.970424			gntT	b3415	-0.0191958	0.991332		gntT	b3415	0.379425	0.904903		gntT	b3415	-0.575345	0.586236			gntT	b3415	-0.359913	0.875613		gntT	b3415	0.810546	0.303826		gntT	b3415	-0.503557	0.984035
gntU	b4476	-0.368117	0.952141		gntU	b4476	0.0977315	0.972494		gntU	b4476	-0.925658	0.841781			gntU	b4476	0.0977674	0.967275		gntU	b4476	0.297811	0.96163		gntU	b4476	-0.781637	0.678669			gntU	b4476	-0.0795024	0.988008		gntU	b4476	1.10072	0.383979		gntU	b4476	-1.03919	0.983105
gntX	b3413	-0.476683	0.793993		gntX	b3413	0.049415	0.976817		gntX	b3413	-0.650556	0.723621			gntX	b3413	-0.78661	0.279934		gntX	b3413	-0.24944	0.928231		gntX	b3413	-0.5767	0.56805			gntX	b3413	-0.634863	0.545147		gntX	b3413	0.241844	0.798502		gntX	b3413	-0.673017	0.9763
gor	b3500	0.114307	0.957396		gor	b3500	0.344272	0.585593		gor	b3500	0.00640121	0.996906			gor	b3500	-0.457858	0.414442		gor	b3500	0.584879	0.431273		gor	b3500	0.101135	0.902832			gor	b3500	-0.131641	0.943329		gor	b3500	0.254395	0.680698		gor	b3500	0.0549102	0.990197
gph	b3385	-0.493276	0.832032		gph	b3385	-0.0308104	0.98732		gph	b3385	-0.361004	0.957842			gph	b3385	-0.665178	0.543416		gph	b3385	0.70889	0.708564		gph	b3385	0.232228	0.873342			gph	b3385	-0.428645	0.8518		gph	b3385	0.391288	0.739808		gph	b3385	-0.086788	0.990197
gpmA	b0755	0.43592	0.793993		gpmA	b0755	1.13628	0.0284515		gpmA	b0755	0.743498	0.457575			gpmA	b0755	-0.709605	0.33099		gpmA	b0755	0.324999	0.898725		gpmA	b0755	0.891124	0.153415			gpmA	b0755	-0.433052	0.769217		gpmA	b0755	0.269779	0.774437		gpmA	b0755	0.0268169	0.990946
gpmM	b3612	0.673685	0.793617		gpmM	b3612	1.07575	0.277174		gpmM	b3612	0.390011	0.957842			gpmM	b3612	-0.243478	0.890225		gpmM	b3612	-0.231265	0.962542		gpmM	b3612	-0.916794	0.40492			gpmM	b3612	0.266674	0.943329		gpmM	b3612	1.18089	0.196735		gpmM	b3612	-0.022537	0.99361
gpp	b3779	0.0141978	0.996629		gpp	b3779	-0.474026	0.410267		gpp	b3779	-0.597318	0.567199			gpp	b3779	-0.395887	0.553717		gpp	b3779	-0.0500409	0.978051		gpp	b3779	-0.512684	0.458345			gpp	b3779	-0.120521	0.959765		gpp	b3779	-0.108435	0.899894		gpp	b3779	-0.393426	0.984035
gpr	b3001	-0.39562	0.949061		gpr	b3001	-0.00811057	0.996885		gpr	b3001	0.565245	0.937869			gpr	b3001	-0.604856	0.749599		gpr	b3001	0.305126	0.96163		gpr	b3001	1.11506	0.46122			gpr	b3001	-1.13693	0.592788		gpr	b3001	0.852034	0.56946		gpr	b3001	-0.863915	0.984035
gpsA	b3608	-0.230785	0.937135		gpsA	b3608	-0.655333	0.356513		gpsA	b3608	-0.202056	0.970424			gpsA	b3608	-0.493893	0.569411		gpsA	b3608	0.471042	0.797238		gpsA	b3608	0.166521	0.866993			gpsA	b3608	-0.587002	0.632667		gpsA	b3608	-0.264827	0.790979		gpsA	b3608	0.0707548	0.990197
gpt	b0238	-0.672449	0.9178		gpt	b0238	1.75201	0.324586		gpt	b0238	-1.22307	0.851284			gpt	b0238	-0.689237	0.810874		gpt	b0238	-0.302778	0.967263		gpt	b0238	-2.37811	0.209151			gpt	b0238	-0.0627701	0.994672		gpt	b0238	1.94831	0.230675		gpt	b0238	-1.84826	0.970736
grcA	b2579	1.51846	0.793993		grcA	b2579	0.566774	0.895929		grcA	b2579	0.367025	0.981107			grcA	b2579	-0.410555	0.916548		grcA	b2579	-2.31738	0.542248		grcA	b2579	-2.88781	0.200178			grcA	b2579	1.19178	0.840585		grcA	b2579	1.524	0.56946		grcA	b2579	0.359104	0.989937
greA	b3181	0.117062	0.975178		greA	b3181	0.702815	0.66721		greA	b3181	-0.223269	0.972996			greA	b3181	0.243397	0.905451		greA	b3181	-0.323935	0.956796		greA	b3181	0.43262	0.807395			greA	b3181	0.229207	0.973152		greA	b3181	1.25278	0.275935		greA	b3181	-0.219197	0.989937
greB	b3406	0.455847	0.859803		greB	b3406	-1.0376	0.167561		greB	b3406	0.308791	0.961197			greB	b3406	0.0352349	0.981886		greB	b3406	-0.282854	0.937985		greB	b3406	0.341611	0.816582			greB	b3406	0.310298	0.890851		greB	b3406	0.119356	0.931489		greB	b3406	0.541089	0.984035
groL	b4143	0.0693983	0.974294		groL	b4143	0.497949	0.518136		groL	b4143	0.381495	0.880892			groL	b4143	-0.901188	0.152947		groL	b4143	0.114974	0.967088		groL	b4143	0.0261786	0.977176			groL	b4143	-0.380872	0.807278		groL	b4143	0.916606	0.0974369		groL	b4143	0.2034	0.986829
groS	b4142	0.475427	0.82116		groS	b4142	0.784048	0.298585		groS	b4142	0.830887	0.470715			groS	b4142	-0.837631	0.312903		groS	b4142	-0.620831	0.691829		groS	b4142	0.116522	0.917065			groS	b4142	-0.565203	0.722141		groS	b4142	0.450343	0.62877		groS	b4142	-0.13701	0.989937
grpE	b2614	0.994215	0.50175		grpE	b2614	0.474084	0.71506		grpE	b2614	0.322451	0.958124			grpE	b2614	-0.998568	0.310973		grpE	b2614	-1.14768	0.300592		grpE	b2614	-0.56303	0.613479			grpE	b2614	-0.552279	0.793733		grpE	b2614	0.169586	0.910408		grpE	b2614	-0.358749	0.986829
grxA	b0849	2.40868	0.50175		grxA	b0849	3.63774	0.0046466		grxA	b0849	-3.03544	0.606801			grxA	b0849	0.94384	0.708329		grxA	b0849	1.7641	0.501436		grxA	b0849	-3.18793	0.381132			grxA	b0849	1.92924	0.423564		grxA	b0849	2.27131	0.0954235		grxA	b0849	-3.38432	0.897248
grxB	b1064	1.30892	0.0813987		grxB	b1064	-1.15941	0.0972328		grxB	b1064	-0.108372	0.98124			grxB	b1064	0.229855	0.85787		grxB	b1064	0.494925	0.83933		grxB	b1064	1.10379	0.165229			grxB	b1064	0.967586	0.317909		grxB	b1064	-1.57893	0.0104724		grxB	b1064	-0.579615	0.983105
grxC	b3610	-0.037047	0.985526		grxC	b3610	0.451464	0.699112		grxC	b3610	0.0405696	0.99551			grxC	b3610	0.482017	0.677358		grxC	b3610	0.275183	0.937985		grxC	b3610	0.513552	0.626885			grxC	b3610	-0.299854	0.91225		grxC	b3610	-0.124773	0.931489		grxC	b3610	-0.337654	0.986829
grxD	b1654	0.254192	0.915699		grxD	b1654	0.12835	0.919589		grxD	b1654	-0.113151	0.972996			grxD	b1654	0.357901	0.672809		grxD	b1654	-0.503661	0.691829		grxD	b1654	-0.143851	0.874801			grxD	b1654	0.0837172	0.973152		grxD	b1654	0.383019	0.598625		grxD	b1654	0.544385	0.9763
gshA	b2688	0.557109	0.789406		gshA	b2688	0.438282	0.70827		gshA	b2688	0.668396	0.724735			gshA	b2688	-9.41919e-05	0.999978		gshA	b2688	-0.40314	0.900858		gshA	b2688	-0.0796756	0.946466			gshA	b2688	-0.154745	0.973152		gshA	b2688	-0.00230437	0.999506		gshA	b2688	0.219142	0.989851
gshB	b2947	0.14233	0.957396		gshB	b2947	0.226236	0.828967		gshB	b2947	0.0735694	0.98145			gshB	b2947	-0.0398172	0.972182		gshB	b2947	0.373218	0.830025		gshB	b2947	0.0454617	0.962343			gshB	b2947	-0.0814807	0.973152		gshB	b2947	-0.289877	0.69557		gshB	b2947	-0.0304776	0.990561
gsiA	b0829	-0.0424404	0.984662		gsiA	b0829	0.00796937	0.995929		gsiA	b0829	0.771251	0.544199			gsiA	b0829	-0.0628766	0.961801		gsiA	b0829	0.607538	0.697007		gsiA	b0829	0.810673	0.319549			gsiA	b0829	-0.37947	0.830194		gsiA	b0829	-1.02133	0.0983271		gsiA	b0829	0.153007	0.989937
gsiB	b0830	-0.355838	0.843348		gsiB	b0830	0.0715427	0.965898		gsiB	b0830	0.33145	0.921494			gsiB	b0830	-0.168135	0.872665		gsiB	b0830	0.957972	0.21851		gsiB	b0830	0.598337	0.497734			gsiB	b0830	-0.346303	0.830194		gsiB	b0830	-0.829308	0.155743		gsiB	b0830	-0.133999	0.989937
gsiC	b0831	0.0773033	0.98235		gsiC	b0831	-0.00656163	0.996885		gsiC	b0831	0.390855	0.958124			gsiC	b0831	0.247518	0.87786		gsiC	b0831	0.242199	0.96163		gsiC	b0831	0.474382	0.773644			gsiC	b0831	-0.0768999	0.985559		gsiC	b0831	-0.685374	0.541755		gsiC	b0831	0.099933	0.990197
gsiD	b0832	-0.914197	0.624511		gsiD	b0832	0.443303	0.830825		gsiD	b0832	0.287289	0.972653			gsiD	b0832	0.299489	0.855646		gsiD	b0832	1.43595	0.394199		gsiD	b0832	3.58003	0.224009			gsiD	b0832	-0.216839	0.962025		gsiD	b0832	0.217364	0.906378		gsiD	b0832	-0.241574	0.989937
gsk	b0477	0.508674	0.870081		gsk	b0477	-0.300165	0.865188		gsk	b0477	0.361486	0.958124			gsk	b0477	-0.166776	0.918305		gsk	b0477	-0.473054	0.900858		gsk	b0477	0.243217	0.866993			gsk	b0477	0.362346	0.906212		gsk	b0477	0.135939	0.935897		gsk	b0477	0.331131	0.986829
gspA	b3323	-0.912162	0.848761		gspA	b3323	-0.0206111	0.99538		gspA	b3323	0.771551	0.941427			gspA	b3323	0.423308	0.890591		gspA	b3323	-0.477927	0.952565		gspA	b3323	0.724698	0.807395			gspA	b3323	0.389754	0.955347		gspA	b3323	-0.398575	0.881443		gspA	b3323	0.844795	0.986829
gspB	b3322	0.535234	NA		gspB	b3322	1.46373	NA		gspB	b3322	-2.24228	NA			gspB	b3322	0.53286	0.876625		gspB	b3322	0.932782	NA		gspB	b3322	-1.42362	NA			gspB	b3322	0.895337	0.862729		gspB	b3322	0.581296	NA		gspB	b3322	-2.66987	0.9763
gspC	b3324	-0.93392	NA		gspC	b3324	0.0470508	NA		gspC	b3324	0.0473254	NA			gspC	b3324	1.61818	0.659642		gspC	b3324	0.140903	NA		gspC	b3324	0.20663	NA			gspC	b3324	-0.364422	0.973152		gspC	b3324	-0.697763	NA		gspC	b3324	0.157248	0.990197
gspD	b3325	-0.826159	0.833944		gspD	b3325	-0.22373	0.939433		gspD	b3325	0.571661	0.957842			gspD	b3325	-1.07812	0.523045		gspD	b3325	-0.26909	0.964701		gspD	b3325	-0.124545	0.958829			gspD	b3325	-0.570629	0.887264		gspD	b3325	-0.501445	0.768293		gspD	b3325	-0.0801552	0.990197
gspE	b3326	0.237483	NA		gspE	b3326	0.204997	NA		gspE	b3326	-0.287245	NA			gspE	b3326	-0.0736748	0.981914		gspE	b3326	-0.0705867	NA		gspE	b3326	1.00993	NA			gspE	b3326	-0.517349	0.916195		gspE	b3326	0.508003	NA		gspE	b3326	-0.626447	0.989782
gspF	b3327	0.163343	0.973724		gspF	b3327	-1.16214	0.541806		gspF	b3327	0.59717	0.933708			gspF	b3327	0.609863	0.740429		gspF	b3327	-1.35007	0.651418		gspF	b3327	0.528154	0.807395			gspF	b3327	0.339036	0.93347		gspF	b3327	-1.67162	0.224617		gspF	b3327	0.420988	0.987674
gspG	b3328	-3.77327	NA		gspG	b3328	1.96474	NA		gspG	b3328	-0.648314	NA			gspG	b3328	-2.57236	NA		gspG	b3328	0.56553	NA		gspG	b3328	-1.43685	NA			gspG	b3328	-1.6126	NA		gspG	b3328	-0.287608	NA		gspG	b3328	-1.1487	NA
gspH	b3329	1.02114	NA		gspH	b3329	1.39819	NA		gspH	b3329	0.537159	NA			gspH	b3329	1.57789	NA		gspH	b3329	2.04122	NA		gspH	b3329	0.081905	NA			gspH	b3329	1.76692	0.722141		gspH	b3329	2.95495	NA		gspH	b3329	-1.44257	NA
gspI	b3330	0.184474	NA		gspI	b3330	0.595547	NA		gspI	b3330	-0.648615	NA			gspI	b3330	1.00083	NA		gspI	b3330	0.154304	NA		gspI	b3330	0.995688	NA			gspI	b3330	0.601232	NA		gspI	b3330	0.00574732	NA		gspI	b3330	-0.0284107	NA
gspJ	b3331	-0.122999	NA		gspJ	b3331	0.293562	NA		gspJ	b3331	0.114374	NA			gspJ	b3331	0.0592875	0.983324		gspJ	b3331	-0.314928	NA		gspJ	b3331	-0.585174	NA			gspJ	b3331	0.937949	0.773522		gspJ	b3331	-0.397839	NA		gspJ	b3331	-0.0957473	0.990946
gspK	b3332	-0.987732	0.82581		gspK	b3332	0.0663996	0.986966		gspK	b3332	0.33022	0.972462			gspK	b3332	-0.848325	0.694993		gspK	b3332	-0.219902	0.971213		gspK	b3332	0.510416	0.827133			gspK	b3332	-0.208369	0.973152		gspK	b3332	-0.179627	0.937109		gspK	b3332	1.27808	0.9763
gspL	b3333	-0.28352	0.957396		gspL	b3333	0.370691	0.854711		gspL	b3333	-0.620647	0.937998			gspL	b3333	-0.224112	0.904919		gspL	b3333	0.283238	0.957531		gspL	b3333	0.318193	0.89484			gspL	b3333	0.338232	0.930294		gspL	b3333	0.0873736	0.960903		gspL	b3333	-1.0757	0.983105
gspM	b3334	-0.0253067	NA		gspM	b3334	-0.31789	NA		gspM	b3334	-0.26813	NA			gspM	b3334	0.0226163	0.997249		gspM	b3334	-0.585918	0.947875		gspM	b3334	0.215279	NA			gspM	b3334	-1.05796	0.890851		gspM	b3334	0.493532	NA		gspM	b3334	0.554896	0.989937
gspO	b3335	-0.52854	0.851034		gspO	b3335	-0.609258	0.589497		gspO	b3335	-0.405808	0.933708			gspO	b3335	0.63124	0.632469		gspO	b3335	-0.268543	0.947562		gspO	b3335	0.284687	0.837701			gspO	b3335	0.18738	0.969807		gspO	b3335	0.213019	0.883038		gspO	b3335	0.791619	0.9763
gss	b2988	-0.0262703	0.985526		gss	b2988	-0.561325	0.357989		gss	b2988	1.2879	0.011041			gss	b2988	-0.439913	0.523045		gss	b2988	0.296212	0.898258		gss	b2988	0.949284	0.176383			gss	b2988	-0.22648	0.890851		gss	b2988	-0.389367	0.558987		gss	b2988	-0.136964	0.989937
gstA	b1635	0.444688	0.832032		gstA	b1635	0.177088	0.906523		gstA	b1635	0.739854	0.596755			gstA	b1635	0.786442	0.367492		gstA	b1635	-0.0676022	0.978051		gstA	b1635	-0.0374584	0.972298			gstA	b1635	0.312017	0.895757		gstA	b1635	-1.1274	0.074781		gstA	b1635	-0.133233	0.989937
gstB	b0838	-0.119049	0.96293		gstB	b0838	0.240855	0.821368		gstB	b0838	0.0967928	0.981107			gstB	b0838	-0.124981	0.900204		gstB	b0838	0.498864	0.708564		gstB	b0838	0.0226831	0.982142			gstB	b0838	0.187448	0.930294		gstB	b0838	-0.219125	0.806605		gstB	b0838	0.145971	0.989937
gtrA	b2350	0.930294	0.675248		gtrA	b2350	0.461815	0.776811		gtrA	b2350	0.111444	0.988459			gtrA	b2350	1.15623	0.320186		gtrA	b2350	0.410136	0.918257		gtrA	b2350	0.893206	0.601152			gtrA	b2350	0.486861	0.844089		gtrA	b2350	-0.288355	0.843738		gtrA	b2350	-0.427743	0.986829
gtrB	b2351	0.240754	0.957396		gtrB	b2351	0.167505	0.949957		gtrB	b2351	-0.707957	0.902741			gtrB	b2351	0.521955	0.72068		gtrB	b2351	0.452616	0.917335		gtrB	b2351	0.230298	0.916849			gtrB	b2351	0.553658	0.825699		gtrB	b2351	0.332615	0.834573		gtrB	b2351	-0.272582	0.989937
gtrS	b2352	-0.0732816	NA		gtrS	b2352	-2.18449	NA		gtrS	b2352	-2.93718	NA			gtrS	b2352	0.664974	0.807925		gtrS	b2352	-0.841512	0.898258		gtrS	b2352	-1.42338	NA			gtrS	b2352	-0.062834	0.992717		gtrS	b2352	0.24768	NA		gtrS	b2352	-3.83612	0.717695
guaA	b2507	-0.651283	0.754258		guaA	b2507	0.112812	0.959338		guaA	b2507	0.00925035	0.997544			guaA	b2507	-1.31569	0.104943		guaA	b2507	0.11661	0.97596		guaA	b2507	-0.705687	0.501206			guaA	b2507	-0.190401	0.965684		guaA	b2507	0.0230108	0.984936		guaA	b2507	-0.0398877	0.990561
guaB	b2508	-0.517892	0.899307		guaB	b2508	0.392741	0.85156		guaB	b2508	0.588364	0.903221			guaB	b2508	-1.50696	0.193995		guaB	b2508	0.725576	0.830025		guaB	b2508	-0.252779	0.874801			guaB	b2508	0.0149651	0.997025		guaB	b2508	0.304614	0.870531		guaB	b2508	0.567455	0.986829
guaC	b0104	0.205007	0.964568		guaC	b0104	0.0856301	0.972494		guaC	b0104	-0.227427	0.972462			guaC	b0104	-0.191417	0.916548		guaC	b0104	-0.343292	0.941174		guaC	b0104	-0.320333	0.843069			guaC	b0104	-0.595673	0.827691		guaC	b0104	-0.810019	0.503566		guaC	b0104	-0.974924	0.9763
guaD	b2883	0.993389	0.793993		guaD	b2883	1.09504	0.517126		guaD	b2883	1.62252	0.470715			guaD	b2883	0.962749	0.607292		guaD	b2883	0.0160236	0.997361		guaD	b2883	1.11961	0.542513			guaD	b2883	1.13498	0.682585		guaD	b2883	-1.59446	0.200622		guaD	b2883	0.449928	0.989491
gudD	b2787	-0.328282	0.915699		gudD	b2787	0.58624	0.571654		gudD	b2787	0.621249	0.819756			gudD	b2787	-0.359083	0.770028		gudD	b2787	0.141536	0.967088		gudD	b2787	0.484903	0.722123			gudD	b2787	-0.295441	0.903754		gudD	b2787	0.23931	0.838614		gudD	b2787	0.621795	0.984035
gudP	b2789	-0.166744	0.975493		gudP	b2789	-0.0627182	0.986988		gudP	b2789	1.31993	0.699678			gudP	b2789	0.656265	0.825308		gudP	b2789	0.586426	0.918257		gudP	b2789	0.945326	0.689991			gudP	b2789	0.659439	0.895757		gudP	b2789	0.101318	0.963309		gudP	b2789	1.27112	0.983105
gudX	b2788	-0.449895	0.946716		gudX	b2788	-0.218015	0.951476		gudX	b2788	0.445746	0.970424			gudX	b2788	0.141573	0.95498		gudX	b2788	-0.493499	0.935815		gudX	b2788	-0.668987	0.763157			gudX	b2788	-0.0516135	0.99367		gudX	b2788	-0.557457	0.774947		gudX	b2788	-0.00878258	0.997867
gyrA	b2231	-0.0970011	0.969047		gyrA	b2231	-0.497852	0.4132		gyrA	b2231	-0.442263	0.754209			gyrA	b2231	-0.626106	0.307093		gyrA	b2231	0.256374	0.905198		gyrA	b2231	0.0223443	0.977986			gyrA	b2231	-0.424438	0.718553		gyrA	b2231	0.647288	0.215068		gyrA	b2231	0.222547	0.986829
gyrB	b3699	-0.104945	0.972842		gyrB	b3699	-0.0336574	0.986951		gyrB	b3699	-0.416647	0.880892			gyrB	b3699	-0.373373	0.704119		gyrB	b3699	-0.165365	0.96163		gyrB	b3699	-0.322218	0.736585			gyrB	b3699	-0.285629	0.895757		gyrB	b3699	0.48698	0.541222		gyrB	b3699	0.17341	0.989937
hcaB	b2541	0.976381	0.713441		hcaB	b2541	0.332996	0.862048		hcaB	b2541	-0.0334955	0.996787			hcaB	b2541	0.797561	0.580134		hcaB	b2541	-0.0183381	0.99443		hcaB	b2541	-0.395233	0.81816			hcaB	b2541	0.562235	0.830194		hcaB	b2541	0.319706	0.830749		hcaB	b2541	0.137779	0.990197
hcaC	b2540	-0.484779	0.956354		hcaC	b2540	2.72605	0.100159		hcaC	b2540	-0.764622	0.957842			hcaC	b2540	-0.156319	0.956246		hcaC	b2540	0.175807	0.977318		hcaC	b2540	-1.35927	0.584289			hcaC	b2540	0.229245	0.973152		hcaC	b2540	0.0228385	0.987324		hcaC	b2540	-1.16195	0.984035
hcaD	b2542	-0.305336	0.946716		hcaD	b2542	0.838774	0.428995		hcaD	b2542	-0.16306	0.981107			hcaD	b2542	0.791947	0.509895		hcaD	b2542	0.246371	0.957531		hcaD	b2542	-0.286993	0.854294			hcaD	b2542	0.424095	0.86689		hcaD	b2542	0.398083	0.748971		hcaD	b2542	0.158876	0.990197
hcaE	b2538	-0.555694	0.787532		hcaE	b2538	1.01783	0.154921		hcaE	b2538	-0.108657	0.98124			hcaE	b2538	-0.0135342	0.994812		hcaE	b2538	0.399155	0.886179		hcaE	b2538	-0.271719	0.821869			hcaE	b2538	-0.0340541	0.992717		hcaE	b2538	0.10862	0.934488		hcaE	b2538	-0.315973	0.986829
hcaF	b2539	-0.160432	0.974294		hcaF	b2539	0.660199	0.676849		hcaF	b2539	0.764773	0.851284			hcaF	b2539	0.221129	0.931261		hcaF	b2539	0.280251	0.960082		hcaF	b2539	0.249851	0.897407			hcaF	b2539	0.0270293	0.996275		hcaF	b2539	0.236082	0.892662		hcaF	b2539	0.297	0.989937
hcaR	b2537	-0.722778	0.901845		hcaR	b2537	1.19756	0.544997		hcaR	b2537	0.469613	0.970424			hcaR	b2537	0.00231087	0.99934		hcaR	b2537	-0.176306	0.978051		hcaR	b2537	0.568288	0.807395			hcaR	b2537	-1.28612	0.689208		hcaR	b2537	1.18491	0.516073		hcaR	b2537	-0.779449	0.986829
hcaT	b2536	-0.43293	0.934547		hcaT	b2536	-0.587602	0.743105		hcaT	b2536	-0.222643	0.974731			hcaT	b2536	0.0942311	0.969182		hcaT	b2536	-0.20351	0.97084		hcaT	b2536	-1.12142	0.42512			hcaT	b2536	-0.363622	0.93347		hcaT	b2536	-0.00205073	0.999689		hcaT	b2536	-0.686621	0.984035
hchA	b1967	1.65142	0.0441793		hchA	b1967	-0.510296	0.692638		hchA	b1967	0.582454	0.851284			hchA	b1967	1.91526	0.00526179		hchA	b1967	0.175571	0.965947		hchA	b1967	0.690815	0.532489			hchA	b1967	1.23687	0.210213		hchA	b1967	-0.5253	0.650459		hchA	b1967	0.679673	0.983105
hcp	b0873	-1.61939	0.618612		hcp	b0873	0.695933	0.795267		hcp	b0873	-1.84283	0.851871			hcp	b0873	-0.691077	0.810874		hcp	b0873	-0.474822	0.941174		hcp	b0873	-3.2469	0.286703			hcp	b0873	-0.280795	0.973152		hcp	b0873	0.0645409	0.975887		hcp	b0873	-2.10036	0.983105
hcr	b0872	-0.196236	0.974294		hcr	b0872	0.960995	0.668729		hcr	b0872	-1.48868	0.903221			hcr	b0872	0.0929815	0.979633		hcr	b0872	0.60787	0.918257		hcr	b0872	-1.99396	0.583988			hcr	b0872	0.239302	0.973152		hcr	b0872	0.217586	0.931489		hcr	b0872	-0.115025	0.991513
hda	b2496	-0.185311	0.964381		hda	b2496	-0.662024	0.597806		hda	b2496	-0.860373	0.817497			hda	b2496	-0.586929	0.642048		hda	b2496	-0.679977	0.794701		hda	b2496	-0.445559	0.813193			hda	b2496	-0.134794	0.973152		hda	b2496	-0.0126389	0.99049		hda	b2496	-0.867065	0.983744
hdeA	b3510	0.403587	0.818408		hdeA	b3510	0.333647	0.717374		hdeA	b3510	0.677432	0.537335			hdeA	b3510	0.259298	0.807925		hdeA	b3510	-0.356658	0.867153		hdeA	b3510	1.15864	0.0311929			hdeA	b3510	0.856872	0.238363		hdeA	b3510	-0.57282	0.386425		hdeA	b3510	-0.167006	0.989937
hdeB	b3509	1.33727	0.190543		hdeB	b3509	0.274193	0.871076		hdeB	b3509	0.807286	0.653495			hdeB	b3509	1.41461	0.0817013		hdeB	b3509	0.0838023	0.978051		hdeB	b3509	1.14347	0.199202			hdeB	b3509	1.5631	0.047933		hdeB	b3509	-0.903111	0.312284		hdeB	b3509	0.285941	0.986829
hdeD	b3511	0.704212	0.630287		hdeD	b3511	0.412935	0.702732		hdeD	b3511	0.603998	0.752361			hdeD	b3511	1.23054	0.0650985		hdeD	b3511	-0.111459	0.971858		hdeD	b3511	0.320407	0.765213			hdeD	b3511	1.27379	0.0606369		hdeD	b3511	-0.159291	0.898254		hdeD	b3511	0.220783	0.989491
hdfR	b4480	0.598023	0.747386		hdfR	b4480	-0.2897	0.840983		hdfR	b4480	0.26851	0.970424			hdfR	b4480	-0.0959393	0.94415		hdfR	b4480	0.552221	0.815452		hdfR	b4480	0.851388	0.421175			hdfR	b4480	0.399279	0.833934		hdfR	b4480	-0.229099	0.851573		hdfR	b4480	-0.133983	0.989937
hdhA	b1619	0.35086	0.907713		hdhA	b1619	-0.907418	0.277174		hdhA	b1619	-0.473609	0.897309			hdhA	b1619	0.76151	0.433999		hdhA	b1619	-0.193823	0.963838		hdhA	b1619	1.06111	0.221145			hdhA	b1619	-0.137648	0.973152		hdhA	b1619	-0.688285	0.443456		hdhA	b1619	0.145055	0.989937
helD	b0962	0.543547	0.504008		helD	b0962	0.0559954	0.965898		helD	b0962	-0.0960289	0.981107			helD	b0962	-0.0846573	0.915186		helD	b0962	0.168942	0.937985		helD	b0962	-0.147716	0.872224			helD	b0962	-0.079283	0.973152		helD	b0962	-0.588164	0.185098		helD	b0962	-0.250488	0.986829
hemA	b1210	-0.145095	0.96293		hemA	b1210	-0.239022	0.85156		hemA	b1210	-0.420308	0.889948			hemA	b1210	-0.172785	0.892277		hemA	b1210	0.105982	0.971858		hemA	b1210	-0.00377313	0.996876			hemA	b1210	-0.112428	0.973152		hemA	b1210	0.569806	0.451813		hemA	b1210	0.29417	0.986829
hemB	b0369	0.642713	0.734593		hemB	b0369	-0.343508	0.81073		hemB	b0369	-0.0214994	0.996787			hemB	b0369	-0.507964	0.649454		hemB	b0369	-0.0288844	0.989003		hemB	b0369	-0.349086	0.775808			hemB	b0369	0.270823	0.928572		hemB	b0369	-0.0816748	0.953451		hemB	b0369	0.122831	0.990197
hemC	b3805	0.0322572	0.985463		hemC	b3805	-0.432551	0.571654		hemC	b3805	-0.0966428	0.981107			hemC	b3805	-0.0621697	0.953307		hemC	b3805	0.335627	0.869908		hemC	b3805	0.113657	0.907191			hemC	b3805	0.271076	0.871232		hemC	b3805	0.066601	0.94616		hemC	b3805	-0.0582467	0.990197
hemD	b3804	-0.384192	0.868087		hemD	b3804	-0.245727	0.855412		hemD	b3804	0.278432	0.958124			hemD	b3804	-0.409917	0.679039		hemD	b3804	-0.259398	0.936428		hemD	b3804	0.438467	0.677424			hemD	b3804	-0.378179	0.833934		hemD	b3804	-0.279028	0.794172		hemD	b3804	0.151861	0.989937
hemE	b3997	-0.0579222	0.973724		hemE	b3997	0.0782439	0.939857		hemE	b3997	0.28091	0.873975			hemE	b3997	-0.171772	0.809705		hemE	b3997	0.565325	0.356801		hemE	b3997	0.435112	0.42512			hemE	b3997	-0.0862174	0.969807		hemE	b3997	-0.104582	0.885562		hemE	b3997	0.122142	0.989937
hemF	b2436	-0.177202	0.966907		hemF	b2436	0.714116	0.47764		hemF	b2436	0.601633	0.897309			hemF	b2436	0.426692	0.772432		hemF	b2436	0.5615	0.816831		hemF	b2436	-0.447349	0.775808			hemF	b2436	-0.406669	0.862744		hemF	b2436	1.04415	0.164803		hemF	b2436	-0.0500115	0.990561
hemG	b3850	-0.220737	0.956467		hemG	b3850	0.312237	0.828967		hemG	b3850	0.00644042	0.998455			hemG	b3850	-0.461945	0.661294		hemG	b3850	0.799745	0.592927		hemG	b3850	0.325865	0.807555			hemG	b3850	0.0134259	0.996275		hemG	b3850	0.042538	0.971774		hemG	b3850	0.330433	0.986829
hemH	b0475	0.440517	0.832032		hemH	b0475	-0.161378	0.934576		hemH	b0475	0.547392	0.894723			hemH	b0475	0.291661	0.808747		hemH	b0475	0.0632198	0.978051		hemH	b0475	0.571102	0.689991			hemH	b0475	0.0389575	0.990299		hemH	b0475	-0.415785	0.688039		hemH	b0475	0.27528	0.989491
hemL	b0154	0.272422	0.904162		hemL	b0154	-0.0530313	0.971812		hemL	b0154	0.00604609	0.99814			hemL	b0154	-0.421142	0.596212		hemL	b0154	-0.0400719	0.982757		hemL	b0154	-0.366296	0.67927			hemL	b0154	-0.210842	0.915197		hemL	b0154	0.106318	0.923607		hemL	b0154	-0.0769677	0.990197
hemN	b3867	0.417822	0.804675		hemN	b3867	-0.114624	0.937681		hemN	b3867	-0.332184	0.913318			hemN	b3867	0.321357	0.7268		hemN	b3867	-0.0342469	0.985162		hemN	b3867	-0.496598	0.554933			hemN	b3867	0.462102	0.722141		hemN	b3867	-0.189727	0.843738		hemN	b3867	-0.0372289	0.990197
hemX	b3803	-0.379827	0.832032		hemX	b3803	-0.135274	0.926571		hemX	b3803	0.150849	0.972462			hemX	b3803	-0.167465	0.881376		hemX	b3803	0.576908	0.691829		hemX	b3803	0.650755	0.413371			hemX	b3803	-0.520204	0.689276		hemX	b3803	0.116351	0.921945		hemX	b3803	0.328104	0.986829
hemY	b3802	0.0663863	0.974294		hemY	b3802	-0.395448	0.590319		hemY	b3802	0.00769246	0.996787			hemY	b3802	-0.0737778	0.941541		hemY	b3802	0.0507468	0.978051		hemY	b3802	0.086798	0.921328			hemY	b3802	-0.374185	0.755155		hemY	b3802	-0.0785912	0.937433		hemY	b3802	0.0833199	0.990197
hflC	b4175	-0.419407	0.664386		hflC	b4175	-0.513528	0.314051		hflC	b4175	-0.203655	0.956167			hflC	b4175	-0.58774	0.257129		hflC	b4175	-0.244923	0.900858		hflC	b4175	0.0599491	0.935947			hflC	b4175	-0.407947	0.669338		hflC	b4175	0.498977	0.312284		hflC	b4175	0.45	0.9763
hflD	b1132	-0.333633	0.952141		hflD	b1132	-0.637682	0.66831		hflD	b1132	-0.367158	0.970424			hflD	b1132	-0.651119	0.660066		hflD	b1132	0.0247817	0.993469		hflD	b1132	-0.592001	0.709341			hflD	b1132	-0.0197676	0.996275		hflD	b1132	0.587427	0.673292		hflD	b1132	-0.328476	0.989491
hflK	b4174	-0.184872	0.939703		hflK	b4174	-0.270691	0.743025		hflK	b4174	-0.0430472	0.990668			hflK	b4174	-0.260004	0.761113		hflK	b4174	0.205863	0.928859		hflK	b4174	0.182724	0.819937			hflK	b4174	-0.0306093	0.990299		hflK	b4174	0.556406	0.306291		hflK	b4174	0.406333	0.983105
hflX	b4173	0.0339629	0.984662		hflX	b4173	-0.647482	0.265023		hflX	b4173	-0.216004	0.958124			hflX	b4173	0.398822	0.602346		hflX	b4173	-0.441451	0.746216		hflX	b4173	0.482883	0.48072			hflX	b4173	0.31569	0.830194		hflX	b4173	0.17572	0.843738		hflX	b4173	0.418354	0.983105
hfq	b4172	0.47777	0.82116		hfq	b4172	-0.241954	0.865188		hfq	b4172	-0.0368432	0.996209			hfq	b4172	1.06259	0.167326		hfq	b4172	-0.490236	0.830025		hfq	b4172	0.716333	0.40492			hfq	b4172	0.829372	0.440012		hfq	b4172	0.0854768	0.94616		hfq	b4172	0.0622758	0.990197
hha	b0460	1.92075	0.504053		hha	b0460	0.491813	0.847582		hha	b0460	-0.426208	0.970424			hha	b0460	0.937275	0.649454		hha	b0460	-0.75215	0.869908		hha	b0460	-0.77597	0.709629			hha	b0460	1.44105	0.516543		hha	b0460	-1.0218	0.508575		hha	b0460	-1.3509	0.9763
hicA	b4532	0.512275	0.914581		hicA	b4532	0.860284	0.618883		hicA	b4532	-0.232241	0.981107			hicA	b4532	-0.641172	0.680159		hicA	b4532	-0.71309	0.851154		hicA	b4532	-0.605204	0.775808			hicA	b4532	-0.671256	0.800012		hicA	b4532	0.543889	0.743275		hicA	b4532	0.130472	0.990197
hicB	b1438	-0.632146	0.906545		hicB	b1438	1.66817	0.257144		hicB	b1438	1.52326	0.46736			hicB	b1438	-0.731018	0.708903		hicB	b1438	-0.113858	0.978051		hicB	b1438	1.13516	0.538619			hicB	b1438	-0.39904	0.936466		hicB	b1438	0.810334	0.598625		hicB	b1438	1.30069	0.9763
higA	b3082	-1.51639	0.657858		higA	b3082	0.851603	0.70929		higA	b3082	1.57629	0.487756			higA	b3082	-0.061416	0.985737		higA	b3082	-0.491699	0.937985		higA	b3082	-0.788253	0.670666			higA	b3082	-1.27672	0.711724		higA	b3082	-0.094699	0.965022		higA	b3082	0.563414	0.986829
higB	b3083	0.172784	NA		higB	b3083	1.94673	NA		higB	b3083	-1.78673	NA			higB	b3083	1.11419	NA		higB	b3083	-0.257648	NA		higB	b3083	-2.80256	NA			higB	b3083	-1.00552	0.920472		higB	b3083	-0.253393	NA		higB	b3083	-2.41389	NA
hinT	b1103	0.0798374	0.974294		hinT	b1103	0.444824	0.684303		hinT	b1103	0.321475	0.955278			hinT	b1103	0.502803	0.60974		hinT	b1103	0.324256	0.918257		hinT	b1103	0.995851	0.259758			hinT	b1103	-0.0541707	0.988008		hinT	b1103	-0.208436	0.864408		hinT	b1103	0.400337	0.986829
hipA	b1507	0.613791	0.82116		hipA	b1507	0.513288	0.725688		hipA	b1507	-0.530553	0.933708			hipA	b1507	0.502997	0.703049		hipA	b1507	0.301944	0.947028		hipA	b1507	0.385181	0.842756			hipA	b1507	-0.0447987	0.992052		hipA	b1507	-0.552223	0.641137		hipA	b1507	-0.873793	0.983105
hipB	b1508	0.128972	0.974294		hipB	b1508	0.119565	0.967304		hipB	b1508	0.129334	0.988459			hipB	b1508	0.761723	0.601541		hipB	b1508	1.08717	0.691829		hipB	b1508	0.967425	0.681341			hipB	b1508	0.0752035	0.988008		hipB	b1508	-0.708261	0.62753		hipB	b1508	0.305127	0.989937
hisA	b2024	-0.942486	0.578507		hisA	b2024	-0.426205	0.776811		hisA	b2024	0.338813	0.958697			hisA	b2024	-1.09553	0.270718		hisA	b2024	0.0466631	0.985271		hisA	b2024	0.991632	0.425667			hisA	b2024	-1.13517	0.306782		hisA	b2024	-1.07057	0.205738		hisA	b2024	0.378382	0.986829
hisB	b2022	-0.0341139	0.988334		hisB	b2022	-0.0158875	0.994331		hisB	b2022	0.345831	0.953742			hisB	b2022	-0.391282	0.749686		hisB	b2022	0.544045	0.821193		hisB	b2022	0.41002	0.736307			hisB	b2022	-0.22245	0.943329		hisB	b2022	-0.171	0.897835		hisB	b2022	0.00342454	0.997867
hisC	b2021	-0.232945	0.957396		hisC	b2021	0.566982	0.642173		hisC	b2021	0.583113	0.855487			hisC	b2021	-0.296235	0.844194		hisC	b2021	0.955743	0.522912		hisC	b2021	0.283104	0.840507			hisC	b2021	-0.00979672	0.99741		hisC	b2021	0.307789	0.817345		hisC	b2021	0.40613	0.986829
hisD	b2020	-0.155224	0.964568		hisD	b2020	0.435826	0.68482		hisD	b2020	0.428076	0.902741			hisD	b2020	-0.347632	0.778993		hisD	b2020	1.1108	0.205086		hisD	b2020	0.479005	0.651061			hisD	b2020	-0.0269225	0.994672		hisD	b2020	0.117765	0.931489		hisD	b2020	0.000366563	0.999551
hisF	b2025	-0.0465758	0.985463		hisF	b2025	-0.368757	0.789561		hisF	b2025	0.122873	0.98124			hisF	b2025	-0.852729	0.392779		hisF	b2025	0.485662	0.867153		hisF	b2025	0.615844	0.628994			hisF	b2025	-0.814976	0.538964		hisF	b2025	-0.167615	0.906471		hisF	b2025	-0.351385	0.986829
hisG	b2019	-0.348466	0.925513		hisG	b2019	0.805679	0.383335		hisG	b2019	0.260759	0.970424			hisG	b2019	-0.764766	0.497351		hisG	b2019	0.807265	0.624366		hisG	b2019	0.444831	0.736892			hisG	b2019	-0.527713	0.806793		hisG	b2019	0.294616	0.817345		hisG	b2019	-0.265894	0.989491
hisH	b2023	-1.06595	0.500778		hisH	b2023	-0.664055	0.595422		hisH	b2023	0.599736	0.873975			hisH	b2023	-1.00207	0.343561		hisH	b2023	0.0439336	0.985954		hisH	b2023	1.69284	0.147398			hisH	b2023	-0.843168	0.597156		hisH	b2023	-0.6824	0.529162		hisH	b2023	0.464203	0.986829
hisI	b2026	0.0264658	0.995828		hisI	b2026	-0.280003	0.856779		hisI	b2026	-0.369732	0.957842			hisI	b2026	-0.0691476	0.967206		hisI	b2026	0.00877115	0.99737		hisI	b2026	0.0260834	0.986489			hisI	b2026	-0.120858	0.973152		hisI	b2026	-0.188754	0.889414		hisI	b2026	-0.194265	0.989937
hisJ	b2309	1.10745	0.608839		hisJ	b2309	1.95944	0.0393969		hisJ	b2309	2.32094	0.0129886			hisJ	b2309	2.50475	0.00412506		hisJ	b2309	0.473107	0.918257		hisJ	b2309	1.89947	0.0834783			hisJ	b2309	1.03599	0.623258		hisJ	b2309	-0.534206	0.737267		hisJ	b2309	0.402696	0.986829
hisL	b2018	-0.415706	0.956579		hisL	b2018	-1.4584	0.383335		hisL	b2018	0.512484	0.966987			hisL	b2018	0.978691	0.649454		hisL	b2018	-1.92928	0.369393		hisL	b2018	2.04046	0.206043			hisL	b2018	0.315809	0.969807		hisL	b2018	1.40329	0.392493		hisL	b2018	0.718564	0.986829
hisM	b2307	0.844357	0.777063		hisM	b2307	0.688011	0.693153		hisM	b2307	0.31871	0.972462			hisM	b2307	2.90999	0.00444116		hisM	b2307	0.613519	0.895363		hisM	b2307	-0.0865864	0.969104			hisM	b2307	0.842016	0.711264		hisM	b2307	-1.47318	0.143041		hisM	b2307	-0.598565	0.986829
hisP	b2306	0.863511	0.503207		hisP	b2306	0.467734	0.728712		hisP	b2306	1.96559	0.0129886			hisP	b2306	1.99597	0.00043676		hisP	b2306	0.64184	0.779368		hisP	b2306	2.13344	0.0692269			hisP	b2306	0.39533	0.835184		hisP	b2306	-0.836705	0.318381		hisP	b2306	1.0563	0.897248
hisQ	b2308	1.05985	0.538921		hisQ	b2308	1.41238	0.154921		hisQ	b2308	2.20861	0.0118877			hisQ	b2308	2.14829	0.00579518		hisQ	b2308	0.0763609	0.97894		hisQ	b2308	1.24183	0.325888			hisQ	b2308	0.506454	0.842926		hisQ	b2308	-1.22866	0.178979		hisQ	b2308	0.300094	0.989782
hisR	b3797	0.61332	0.913068		hisR	b3797	0.0830557	0.983436		hisR	b3797	-0.187303	0.98124			hisR	b3797	1.60121	0.337632		hisR	b3797	-0.510005	0.934236		hisR	b3797	-0.558718	0.786339			hisR	b3797	1.42954	0.524581		hisR	b3797	1.66879	0.215257		hisR	b3797	-0.412216	0.989491
hisS	b2514	-0.106071	0.97305		hisS	b2514	0.067203	0.967304		hisS	b2514	0.27429	0.957842			hisS	b2514	-0.473312	0.60939		hisS	b2514	-0.605219	0.691829		hisS	b2514	-0.307398	0.766523			hisS	b2514	-0.269465	0.908945		hisS	b2514	-0.108272	0.931489		hisS	b2514	-0.501429	0.984035
hiuH	b1970	0.623198	0.944675		hiuH	b1970	-1.02129	0.673175		hiuH	b1970	-0.123451	0.991827			hiuH	b1970	1.66316	0.490116		hiuH	b1970	0.17453	0.978051		hiuH	b1970	1.94542	0.554945			hiuH	b1970	1.28556	0.722141		hiuH	b1970	-0.613313	0.812072		hiuH	b1970	-0.352184	0.989937
hldD	b3619	0.708686	0.299378		hldD	b3619	0.179512	0.851333		hldD	b3619	0.105061	0.972653			hldD	b3619	-0.120881	0.892917		hldD	b3619	0.362808	0.794701		hldD	b3619	-0.0888556	0.911887			hldD	b3619	0.431686	0.665007		hldD	b3619	0.213941	0.770448		hldD	b3619	0.0778045	0.990197
hldE	b3052	-0.509448	0.459639		hldE	b3052	-0.00776281	0.994331		hldE	b3052	0.00018844	0.999431			hldE	b3052	-0.752483	0.0333739		hldE	b3052	0.0496339	0.978051		hldE	b3052	-0.119619	0.874801			hldE	b3052	-0.673538	0.0933596		hldE	b3052	-0.0603666	0.938999		hldE	b3052	0.155004	0.989491
hlyE	b1182	1.65002	NA		hlyE	b1182	-1.56715	NA		hlyE	b1182	-0.113683	NA			hlyE	b1182	-0.69095	0.895774		hlyE	b1182	-2.83949	0.691829		hlyE	b1182	-1.90662	NA			hlyE	b1182	-0.98046	0.916195		hlyE	b1182	-3.09417	NA		hlyE	b1182	-0.649782	0.989937
hmp	b2552	0.877892	0.770937		hmp	b2552	-0.0879467	0.975108		hmp	b2552	0.366006	0.970424			hmp	b2552	0.250759	0.895774		hmp	b2552	0.646172	0.867153		hmp	b2552	0.886114	0.577231			hmp	b2552	0.599473	0.83687		hmp	b2552	0.646061	0.65855		hmp	b2552	-1.33318	0.858047
hns	b1237	0.201087	0.957396		hns	b1237	-0.485728	0.691833		hns	b1237	-0.380197	0.937998			hns	b1237	0.629651	0.580134		hns	b1237	-0.846679	0.579215		hns	b1237	0.540901	0.614029			hns	b1237	0.38205	0.890851		hns	b1237	0.612466	0.541186		hns	b1237	0.441841	0.986829
hofB	b0107	0.243737	0.957396		hofB	b0107	-0.573541	0.644044		hofB	b0107	-0.0840595	0.989896			hofB	b0107	-0.339221	0.822894		hofB	b0107	0.200246	0.964932		hofB	b0107	0.572953	0.709013			hofB	b0107	0.483619	0.833538		hofB	b0107	-0.395857	0.744557		hofB	b0107	0.507415	0.986829
hofC	b0106	0.480486	0.936378		hofC	b0106	-1.06058	0.486924		hofC	b0106	-1.87994	0.573438			hofC	b0106	0.462536	0.827058		hofC	b0106	-0.482717	0.930973		hofC	b0106	-1.25715	0.604129			hofC	b0106	0.42584	0.915197		hofC	b0106	-0.648344	0.69557		hofC	b0106	-1.6999	0.9763
hofM	b3395	-0.418894	0.956467		hofM	b3395	-0.0783116	0.983436		hofM	b3395	-0.484436	0.972265			hofM	b3395	-0.571507	0.797751		hofM	b3395	0.0312738	0.993469		hofM	b3395	-1.44749	0.533458			hofM	b3395	-0.365556	0.943329		hofM	b3395	-0.173243	0.936933		hofM	b3395	-0.563846	0.989491
hofN	b3394	-1.52111	NA		hofN	b3394	0.402763	NA		hofN	b3394	-2.40213	NA			hofN	b3394	-0.00208673	0.999518		hofN	b3394	1.98243	NA		hofN	b3394	-2.98422	NA			hofN	b3394	0.865924	0.895757		hofN	b3394	0.628397	NA		hofN	b3394	-3.11879	0.959079
hofO	b3393	1.84675	NA		hofO	b3393	-0.998058	NA		hofO	b3393	-0.652322	NA			hofO	b3393	2.27104	NA		hofO	b3393	1.48607	NA		hofO	b3393	0.995687	NA			hofO	b3393	2.21231	NA		hofO	b3393	-0.0742857	NA		hofO	b3393	-2.18243	NA
hofP	b3392	1.68853	NA		hofP	b3392	-0.538237	NA		hofP	b3392	0.938154	NA			hofP	b3392	-0.18809	NA		hofP	b3392	0.108389	NA		hofP	b3392	0.995687	NA			hofP	b3392	1.27424	NA		hofP	b3392	0.0045879	NA		hofP	b3392	0.0528165	NA
hofQ	b3391	-0.312397	0.966071		hofQ	b3391	1.18625	0.541806		hofQ	b3391	-2.05877	0.795377			hofQ	b3391	-1.24452	0.478851		hofQ	b3391	0.329997	0.96163		hofQ	b3391	-2.31687	0.50136			hofQ	b3391	-1.03355	0.722141		hofQ	b3391	0.0331665	0.984936		hofQ	b3391	-2.36409	0.9763
hokB	b4428	-3.34853	NA		hokB	b4428	0.768481	NA		hokB	b4428	1.42771	NA			hokB	b4428	-2.07555	0.601541		hokB	b4428	-1.03921	NA		hokB	b4428	1.70764	NA			hokB	b4428	-1.38031	0.870031		hokB	b4428	0.894711	NA		hokB	b4428	0.583489	0.989491
hokD	b1562	0.011864	0.997717		hokD	b1562	0.127369	0.962564		hokD	b1562	0.527202	0.903221			hokD	b1562	0.142808	0.941541		hokD	b1562	-0.531481	0.887228		hokD	b1562	-0.227831	0.878311			hokD	b1562	0.541475	0.842214		hokD	b1562	1.92491	0.0191418		hokD	b1562	1.53697	0.486454
hokE	b4415	0.357217	NA		hokE	b4415	2.08405	NA		hokE	b4415	-0.733344	NA			hokE	b4415	1.0448	NA		hokE	b4415	1.31995	NA		hokE	b4415	0.0700266	NA			hokE	b4415	1.45153	NA		hokE	b4415	1.80137	NA		hokE	b4415	0.0753412	NA
holA	b0640	-0.0746331	0.973724		holA	b0640	-0.58965	0.354297		holA	b0640	0.279305	0.937998			holA	b0640	0.0575709	0.95498		holA	b0640	-0.298404	0.900858		holA	b0640	0.312691	0.735084			holA	b0640	0.220879	0.903754		holA	b0640	-0.16806	0.858098		holA	b0640	0.523703	0.9763
holB	b1099	0.0184366	0.997542		holB	b1099	-0.183009	0.901634		holB	b1099	0.0258242	0.996787			holB	b1099	-0.269898	0.827058		holB	b1099	-0.486651	0.829617		holB	b1099	0.231163	0.848871			holB	b1099	0.218847	0.939897		holB	b1099	-0.0620396	0.961307		holB	b1099	0.385498	0.986829
holC	b4259	0.0122485	0.997717		holC	b4259	-0.274057	0.830825		holC	b4259	0.291458	0.957842			holC	b4259	0.0562139	0.968132		holC	b4259	0.0657799	0.978051		holC	b4259	0.312649	0.775808			holC	b4259	-0.180716	0.947555		holC	b4259	0.348364	0.716003		holC	b4259	0.427993	0.984035
holD	b4372	-1.00703	0.49797		holD	b4372	0.00421274	0.997776		holD	b4372	-0.680349	0.819756			holD	b4372	-0.803179	0.476204		holD	b4372	0.325895	0.934726		holD	b4372	-0.371109	0.797279			holD	b4372	-0.28171	0.931128		holD	b4372	1.07293	0.205738		holD	b4372	0.317227	0.986829
holE	b1842	0.37513	0.915699		holE	b1842	0.0923057	0.965898		holE	b1842	-1.19425	0.596755			holE	b1842	-0.501148	0.651821		holE	b1842	0.102951	0.977318		holE	b1842	-0.847865	0.604124			holE	b1842	0.330331	0.895757		holE	b1842	0.193787	0.883038		holE	b1842	-1.21964	0.971465
hpf	b3203	0.617711	0.596557		hpf	b3203	-0.672692	0.303584		hpf	b3203	0.0243521	0.996787			hpf	b3203	0.411893	0.624265		hpf	b3203	-0.479276	0.75254		hpf	b3203	0.908359	0.165229			hpf	b3203	0.68333	0.427421		hpf	b3203	-0.981589	0.0647276		hpf	b3203	0.129083	0.989937
hpt	b0125	0.74963	0.608839		hpt	b0125	0.513552	0.597806		hpt	b0125	-0.0694831	0.988459			hpt	b0125	-0.00860409	0.996697		hpt	b0125	-0.661301	0.673224		hpt	b0125	-0.218918	0.850822			hpt	b0125	0.271294	0.91225		hpt	b0125	-0.196255	0.871861		hpt	b0125	-0.286285	0.986829
hrpA	b1413	0.14078	0.946716		hrpA	b1413	-0.0224149	0.98673		hrpA	b1413	0.23799	0.906057			hrpA	b1413	-0.467042	0.316541		hrpA	b1413	-0.0453033	0.978051		hrpA	b1413	0.2998	0.637345			hrpA	b1413	-0.307031	0.722141		hrpA	b1413	0.00379254	0.993464		hrpA	b1413	0.325974	0.984035
hrpB	b0148	-0.0866897	0.967979		hrpB	b0148	-0.471523	0.343918		hrpB	b0148	0.266803	0.906057			hrpB	b0148	-0.118384	0.883077		hrpB	b0148	-0.173413	0.931415		hrpB	b0148	-0.0575871	0.942405			hrpB	b0148	-0.100333	0.964279		hrpB	b0148	0.022381	0.975022		hrpB	b0148	0.102466	0.989937
hscA	b2526	0.0117596	0.997717		hscA	b2526	0.793943	0.589517		hscA	b2526	1.11106	0.596755			hscA	b2526	-0.851577	0.569218		hscA	b2526	0.333536	0.952163		hscA	b2526	-0.235706	0.88604			hscA	b2526	-0.414698	0.914188		hscA	b2526	0.818518	0.533615		hscA	b2526	-0.229172	0.989937
hscB	b2527	0.457271	0.870971		hscB	b2527	1.03271	0.22925		hscB	b2527	1.36099	0.11591			hscB	b2527	-1.27966	0.113097		hscB	b2527	1.15498	0.285844		hscB	b2527	0.218681	0.866993			hscB	b2527	-0.372102	0.890851		hscB	b2527	1.09231	0.169498		hscB	b2527	-0.0450608	0.990197
hscC	b0650	-1.49314	0.50023		hscC	b0650	0.0968716	0.972494		hscC	b0650	0.346257	0.972462			hscC	b0650	-0.968431	0.578649		hscC	b0650	0.70086	0.857282		hscC	b0650	0.770155	0.73373			hscC	b0650	-0.820695	0.778548		hscC	b0650	0.0416422	0.979822		hscC	b0650	0.122847	0.990197
hsdM	b4349	-0.523647	0.82116		hsdM	b4349	0.910325	0.205814		hsdM	b4349	-0.982012	0.573438			hsdM	b4349	-0.389427	0.749686		hsdM	b4349	0.0825954	0.978051		hsdM	b4349	-1.87044	0.0248216			hsdM	b4349	-0.421988	0.830194		hsdM	b4349	1.0009	0.105421		hsdM	b4349	-0.552143	0.984035
hsdR	b4350	-0.23391	0.956573		hsdR	b4350	0.0405329	0.986988		hsdR	b4350	-0.189297	0.972996			hsdR	b4350	-0.44622	0.702108		hsdR	b4350	0.0351797	0.985954		hsdR	b4350	-0.0838767	0.95989			hsdR	b4350	-0.476352	0.806793		hsdR	b4350	-0.0532679	0.969976		hsdR	b4350	0.0376191	0.991513
hsdS	b4348	-0.708009	0.832032		hsdS	b4348	-0.396619	0.840146		hsdS	b4348	-0.611178	0.937998			hsdS	b4348	-0.086974	0.971154		hsdS	b4348	-0.279965	0.957531		hsdS	b4348	-0.495697	0.818158			hsdS	b4348	0.193194	0.973152		hsdS	b4348	0.852168	0.487036		hsdS	b4348	0.328085	0.989937
hslJ	b1379	0.186719	0.957396		hslJ	b1379	-0.251004	0.862048		hslJ	b1379	0.29121	0.958098			hslJ	b1379	1.04662	0.195904		hslJ	b1379	-1.03278	0.258		hslJ	b1379	-0.158842	0.888371			hslJ	b1379	1.03768	0.243197		hslJ	b1379	0.092574	0.940029		hslJ	b1379	0.187938	0.989937
hslO	b3401	-0.178896	0.956467		hslO	b3401	0.921526	0.0992754		hslO	b3401	0.098054	0.981107			hslO	b3401	-0.357174	0.692875		hslO	b3401	-0.184059	0.951056		hslO	b3401	-0.703718	0.296575			hslO	b3401	-0.423311	0.766868		hslO	b3401	0.720065	0.224617		hslO	b3401	0.109585	0.989937
hslR	b3400	0.0239315	0.994614		hslR	b3400	0.434742	0.597806		hslR	b3400	-0.239361	0.958124			hslR	b3400	-0.553325	0.543416		hslR	b3400	-0.509811	0.708564		hslR	b3400	-0.698346	0.348852			hslR	b3400	-0.160992	0.960546		hslR	b3400	0.256433	0.778441		hslR	b3400	-0.335959	0.986829
hslU	b3931	0.0563598	0.984662		hslU	b3931	0.24791	0.892427		hslU	b3931	0.0112831	0.996787			hslU	b3931	-0.700867	0.564244		hslU	b3931	-0.211737	0.964234		hslU	b3931	-0.215145	0.870754			hslU	b3931	-0.0520436	0.990299		hslU	b3931	0.903734	0.328992		hslU	b3931	0.473813	0.986829
hslV	b3932	-0.177712	0.964568		hslV	b3932	0.443253	0.728712		hslV	b3932	-0.354322	0.955278			hslV	b3932	-0.167571	0.914631		hslV	b3932	-0.428008	0.900858		hslV	b3932	-0.731043	0.480385			hslV	b3932	-0.316253	0.915197		hslV	b3932	0.826641	0.346611		hslV	b3932	0.0130457	0.995884
hspQ	b0966	0.574457	0.723585		hspQ	b0966	0.764734	0.289623		hspQ	b0966	0.231441	0.970424			hspQ	b0966	1.00959	0.167326		hspQ	b0966	-0.311902	0.916205		hspQ	b0966	-1.06534	0.107877			hspQ	b0966	0.901256	0.309509		hspQ	b0966	0.454621	0.605933		hspQ	b0966	0.787926	0.888352
hsrA	b3754	0.627892	0.779976		hsrA	b3754	-0.454256	0.750337		hsrA	b3754	-0.631788	0.90128			hsrA	b3754	0.6526	0.548732		hsrA	b3754	0.0673417	0.980251		hsrA	b3754	-0.180626	0.921328			hsrA	b3754	0.604362	0.712383		hsrA	b3754	-0.209597	0.887585		hsrA	b3754	-0.526332	0.986829
htpG	b0473	0.220835	0.956573		htpG	b0473	0.0867212	0.965898		htpG	b0473	0.479407	0.880892			htpG	b0473	-0.673734	0.50708		htpG	b0473	-0.341948	0.916233		htpG	b0473	-0.25177	0.827527			htpG	b0473	0.00922045	0.99741		htpG	b0473	0.717456	0.387288		htpG	b0473	0.510646	0.984035
htpX	b1829	0.214854	0.956573		htpX	b1829	1.14248	0.0972328		htpX	b1829	0.404888	0.903221			htpX	b1829	-0.10492	0.941541		htpX	b1829	-0.9394	0.393433		htpX	b1829	-0.910532	0.257313			htpX	b1829	0.198784	0.948924		htpX	b1829	0.0189736	0.985163		htpX	b1829	-0.153565	0.989937
htrE	b0139	-1.5011	NA		htrE	b0139	-0.914887	NA		htrE	b0139	0.971015	NA			htrE	b0139	-0.2272	0.953375		htrE	b0139	-2.14168	NA		htrE	b0139	-0.0720161	NA			htrE	b0139	-0.540427	0.943329		htrE	b0139	-1.30018	NA		htrE	b0139	2.00584	0.9763
hupA	b4000	-0.562468	0.797109		hupA	b4000	0.616367	0.572555		hupA	b4000	1.29017	0.136035			hupA	b4000	-0.541885	0.639743		hupA	b4000	0.486809	0.867153		hupA	b4000	1.17101	0.176383			hupA	b4000	-0.687762	0.689208		hupA	b4000	0.29005	0.822587		hupA	b4000	-0.0434761	0.990353
hupB	b0440	-0.388425	0.926685		hupB	b0440	-0.237347	0.910343		hupB	b0440	0.187872	0.974861			hupB	b0440	0.510127	0.749686		hupB	b0440	-0.320703	0.947562		hupB	b0440	1.01811	0.381651			hupB	b0440	-0.383553	0.913193		hupB	b0440	0.631191	0.637537		hupB	b0440	-0.249925	0.989937
hyaA	b0972	0.156396	0.98235		hyaA	b0972	1.31363	0.563066		hyaA	b0972	-0.182121	0.988459			hyaA	b0972	0.672488	0.838099		hyaA	b0972	0.252359	0.973619		hyaA	b0972	-1.32879	0.530801			hyaA	b0972	0.57382	0.93471		hyaA	b0972	1.08705	0.628122		hyaA	b0972	1.2473	0.983744
hyaB	b0973	-1.27399	0.783492		hyaB	b0973	1.26146	0.55404		hyaB	b0973	-0.489336	0.970424			hyaB	b0973	-0.116323	0.976745		hyaB	b0973	0.807686	0.904903		hyaB	b0973	-1.64486	0.375957			hyaB	b0973	-0.35018	0.973152		hyaB	b0973	1.59667	0.360531		hyaB	b0973	0.951134	0.984035
hyaC	b0974	-0.601676	0.9178		hyaC	b0974	1.58795	0.263864		hyaC	b0974	-0.422731	0.970424			hyaC	b0974	0.633378	0.810874		hyaC	b0974	0.758721	0.873323		hyaC	b0974	-1.02198	0.540825			hyaC	b0974	0.23793	0.973152		hyaC	b0974	1.46219	0.277214		hyaC	b0974	1.22205	0.9763
hyaD	b0975	-0.353729	0.96293		hyaD	b0975	0.560335	0.85156		hyaD	b0975	-0.264263	0.981107			hyaD	b0975	0.782256	0.775175		hyaD	b0975	0.283571	0.968911		hyaD	b0975	-1.27203	0.506128			hyaD	b0975	0.888974	0.841207		hyaD	b0975	1.22424	0.513721		hyaD	b0975	1.19932	0.983105
hyaE	b0976	-1.99308	0.631987		hyaE	b0976	0.918209	0.67093		hyaE	b0976	-0.943229	0.877196			hyaE	b0976	-1.34704	0.649906		hyaE	b0976	0.422424	0.955878		hyaE	b0976	-2.23392	0.137533			hyaE	b0976	-0.995485	0.86689		hyaE	b0976	1.18583	0.485427		hyaE	b0976	0.824255	0.986829
hyaF	b0977	-2.02918	0.631987		hyaF	b0977	0.449935	0.898371		hyaF	b0977	0.261503	0.981107			hyaF	b0977	-1.55165	0.588954		hyaF	b0977	0.477188	0.957531		hyaF	b0977	-0.757324	0.763157			hyaF	b0977	-1.4397	0.766157		hyaF	b0977	1.52883	0.428252		hyaF	b0977	1.14555	0.984035
hybA	b2996	0.75116	0.942842		hybA	b2996	1.75614	0.236465		hybA	b2996	-0.150283	0.990431			hybA	b2996	-0.662353	0.820821		hybA	b2996	0.768693	0.869908		hybA	b2996	-1.22805	0.599686			hybA	b2996	-0.182078	0.97697		hybA	b2996	2.25784	0.0560597		hybA	b2996	0.43603	0.989937
hybB	b2995	-1.29934	0.755065		hybB	b2995	0.865679	0.702732		hybB	b2995	0.392816	0.972462			hybB	b2995	0.548626	0.864524		hybB	b2995	-0.351143	0.96163		hybB	b2995	-0.752415	0.773644			hybB	b2995	-0.125204	0.988008		hybB	b2995	1.46151	0.337784		hybB	b2995	0.368427	0.989937
hybC	b2994	-0.608964	0.711173		hybC	b2994	0.728609	0.339883		hybC	b2994	-0.343172	0.947311			hybC	b2994	-0.291885	0.812257		hybC	b2994	0.353331	0.900858		hybC	b2994	-0.278958	0.826771			hybC	b2994	-0.350723	0.862729		hybC	b2994	0.437721	0.608244		hybC	b2994	-0.0846779	0.990197
hybD	b2993	-0.856933	0.654695		hybD	b2993	0.137543	0.956006		hybD	b2993	-0.307132	0.970424			hybD	b2993	-0.5332	0.703049		hybD	b2993	0.646949	0.828269		hybD	b2993	0.524008	0.726914			hybD	b2993	-0.305977	0.930294		hybD	b2993	0.870562	0.399168		hybD	b2993	0.201762	0.989937
hybE	b2992	-0.191825	0.957396		hybE	b2992	-0.224901	0.891946		hybE	b2992	-0.186473	0.972653			hybE	b2992	-0.127841	0.930701		hybE	b2992	0.705287	0.699407		hybE	b2992	-0.324107	0.827133			hybE	b2992	0.05167	0.988422		hybE	b2992	0.586981	0.536646		hybE	b2992	0.287781	0.989491
hybF	b2991	0.171554	0.974994		hybF	b2991	-0.414149	0.892952		hybF	b2991	-0.478177	0.970424			hybF	b2991	-0.13612	0.962133		hybF	b2991	-0.360388	0.962995		hybF	b2991	-0.698265	0.802834			hybF	b2991	0.707114	0.870031		hybF	b2991	-0.0890124	0.970143		hybF	b2991	-0.0649071	0.991513
hybG	b2990	-0.530961	0.760291		hybG	b2990	-0.754633	0.33783		hybG	b2990	-0.0401981	0.996787			hybG	b2990	-0.191858	0.870703		hybG	b2990	0.211713	0.957033		hybG	b2990	0.280324	0.843069			hybG	b2990	-0.208581	0.93347		hybG	b2990	-0.0135016	0.987229		hybG	b2990	0.362894	0.986829
hybO	b2997	-0.628079	0.933351		hybO	b2997	1.95053	0.221003		hybO	b2997	0.513337	0.970424			hybO	b2997	0.819813	0.774827		hybO	b2997	0.360562	0.964234		hybO	b2997	-0.0799538	0.974295			hybO	b2997	0.205274	0.974961		hybO	b2997	2.03188	0.155743		hybO	b2997	0.583016	0.986829
hycA	b2725	0.944752	NA		hycA	b2725	-0.578581	NA		hycA	b2725	-1.07244	NA			hycA	b2725	2.55409	0.663612		hycA	b2725	-2.77236	0.799631		hycA	b2725	-2.23529	NA			hycA	b2725	2.94658	0.727754		hycA	b2725	-1.16426	NA		hycA	b2725	-0.268482	0.990197
hycB	b2724	0.11517	0.985463		hycB	b2724	-0.62581	0.876579		hycB	b2724	-2.83218	0.696186			hycB	b2724	2.49293	0.416141		hycB	b2724	0.957537	0.916205		hycB	b2724	-2.86756	0.475621			hycB	b2724	0.487798	0.959501		hycB	b2724	1.73029	0.487036		hycB	b2724	-2.39582	0.983744
hycC	b2723	-0.315956	0.96293		hycC	b2723	0.265143	0.946693		hycC	b2723	-0.968231	0.910394			hycC	b2723	0.577802	0.827058		hycC	b2723	-0.464346	0.952163		hycC	b2723	-1.73867	0.438685			hycC	b2723	0.140031	0.983058		hycC	b2723	0.12672	0.962115		hycC	b2723	-0.00779552	0.997867
hycD	b2722	1.6408	NA		hycD	b2722	0.0655907	NA		hycD	b2722	0.0437117	NA			hycD	b2722	0.271618	0.944209		hycD	b2722	-1.19159	0.896451		hycD	b2722	-1.76914	NA			hycD	b2722	-0.0375851	0.996275		hycD	b2722	0.132732	NA		hycD	b2722	0.787671	0.989491
hycE	b2721	-0.412362	0.930041		hycE	b2721	-0.0532007	0.986988		hycE	b2721	0.0732081	0.991827			hycE	b2721	-0.221303	0.905451		hycE	b2721	0.483595	0.918257		hycE	b2721	-0.588711	0.754454			hycE	b2721	0.00570957	0.999278		hycE	b2721	-0.0910981	0.961651		hycE	b2721	0.58708	0.986829
hycF	b2720	-1.82691	NA		hycF	b2720	2.1633	NA		hycF	b2720	-1.09996	NA			hycF	b2720	-1.96164	0.379411		hycF	b2720	0.811325	0.903624		hycF	b2720	-2.85737	NA			hycF	b2720	-1.43101	0.722141		hycF	b2720	1.78936	NA		hycF	b2720	-1.09888	0.986829
hycG	b2719	-0.338129	0.957396		hycG	b2719	-0.153094	0.965898		hycG	b2719	-0.650939	0.970424			hycG	b2719	-0.533215	0.790333		hycG	b2719	-0.557981	0.92008		hycG	b2719	-0.811748	0.813193			hycG	b2719	-0.419915	0.915197		hycG	b2719	-0.746966	0.669851		hycG	b2719	-1.02059	0.986829
hycH	b2718	-1.59114	0.513108		hycH	b2718	-0.0427507	0.989874		hycH	b2718	1.51473	0.470715			hycH	b2718	-1.04753	0.587824		hycH	b2718	-0.315284	0.96163		hycH	b2718	0.128246	0.951021			hycH	b2718	-0.950563	0.76179		hycH	b2718	0.527081	0.766239		hycH	b2718	1.24171	0.9763
hycI	b2717	-0.568046	0.783492		hycI	b2717	0.0898554	0.965898		hycI	b2717	0.273941	0.970424			hycI	b2717	-0.69932	0.463445		hycI	b2717	0.129064	0.971858		hycI	b2717	-0.252833	0.867224			hycI	b2717	-0.260415	0.921121		hycI	b2717	0.353798	0.749366		hycI	b2717	0.614436	0.984035
hydN	b2713	-0.177843	0.974994		hydN	b2713	0.000148358	0.999865		hydN	b2713	0.764442	0.947311			hydN	b2713	-1.51017	0.434887		hydN	b2713	-0.199243	0.977631		hydN	b2713	-0.316983	0.907191			hydN	b2713	-0.567174	0.915197		hydN	b2713	0.262507	0.927836		hydN	b2713	0.935916	0.986829
hyfA	b2481	-4.85582	NA		hyfA	b2481	0.0197137	NA		hyfA	b2481	-0.71275	NA			hyfA	b2481	-4.52171	0.14613		hyfA	b2481	0.511656	NA		hyfA	b2481	-1.61993	NA			hyfA	b2481	-3.65762	0.384501		hyfA	b2481	0.455026	NA		hyfA	b2481	-0.703527	0.989937
hyfB	b2482	-0.233094	0.972248		hyfB	b2482	0.701554	0.678508		hyfB	b2482	0.407165	0.970424			hyfB	b2482	-0.950554	0.578649		hyfB	b2482	0.284646	0.96163		hyfB	b2482	-0.218513	0.920169			hyfB	b2482	-0.47204	0.911012		hyfB	b2482	-0.192274	0.918788		hyfB	b2482	-0.176581	0.990197
hyfC	b2483	-0.525276	NA		hyfC	b2483	2.36878	NA		hyfC	b2483	-0.392004	NA			hyfC	b2483	-0.715758	NA		hyfC	b2483	0.74624	NA		hyfC	b2483	-3.20401	NA			hyfC	b2483	-1.56486	NA		hyfC	b2483	-0.0690179	NA		hyfC	b2483	-1.14858	NA
hyfD	b2484	0.137488	NA		hyfD	b2484	-0.0969474	NA		hyfD	b2484	-0.562739	NA			hyfD	b2484	-0.0230192	0.995097		hyfD	b2484	0.117874	0.978051		hyfD	b2484	-0.996079	NA			hyfD	b2484	-0.0600631	0.992717		hyfD	b2484	-0.332857	NA		hyfD	b2484	-0.312724	0.990197
hyfE	b2485	-0.139762	NA		hyfE	b2485	1.41823	NA		hyfE	b2485	0.308441	NA			hyfE	b2485	0.233378	NA		hyfE	b2485	-1.18989	NA		hyfE	b2485	3.38265	NA			hyfE	b2485	1.46662	0.81083		hyfE	b2485	-1.97365	NA		hyfE	b2485	0.556402	NA
hyfF	b2486	-1.80335	0.328958		hyfF	b2486	0.0739249	0.981996		hyfF	b2486	-1.03261	0.829035			hyfF	b2486	-1.19474	0.485537		hyfF	b2486	0.26341	0.96163		hyfF	b2486	-0.891217	0.672125			hyfF	b2486	-1.28506	0.520031		hyfF	b2486	-0.0460657	0.975887		hyfF	b2486	-1.17672	0.983105
hyfG	b2487	-0.474169	0.9178		hyfG	b2487	0.099736	0.972287		hyfG	b2487	0.29714	0.972462			hyfG	b2487	-0.0449214	0.983614		hyfG	b2487	-0.38477	0.940372		hyfG	b2487	-0.28112	0.878311			hyfG	b2487	-0.96621	0.637677		hyfG	b2487	-0.597841	0.680698		hyfG	b2487	0.291384	0.989937
hyfH	b2488	-1.21105	NA		hyfH	b2488	1.03746	NA		hyfH	b2488	0.762008	NA			hyfH	b2488	-0.900642	0.761851		hyfH	b2488	0.851097	0.887228		hyfH	b2488	0.184024	NA			hyfH	b2488	-0.776169	0.890851		hyfH	b2488	-0.621365	NA		hyfH	b2488	0.981712	0.986829
hyfI	b2489	-0.661252	0.867747		hyfI	b2489	-0.459567	0.85156		hyfI	b2489	-0.839614	0.913318			hyfI	b2489	-0.344055	0.865059		hyfI	b2489	-0.135933	0.978051		hyfI	b2489	-1.46588	0.475682			hyfI	b2489	-0.246272	0.967543		hyfI	b2489	-0.395769	0.840683		hyfI	b2489	0.172644	0.990197
hyfJ	b2490	2.61054	NA		hyfJ	b2490	2.931	NA		hyfJ	b2490	0.362806	NA			hyfJ	b2490	0.0488543	NA		hyfJ	b2490	0.55251	NA		hyfJ	b2490	1.98149	NA			hyfJ	b2490	-0.507775	0.962566		hyfJ	b2490	2.45482	NA		hyfJ	b2490	0.173371	0.990197
hyfR	b2491	-0.515134	0.899307		hyfR	b2491	0.480494	0.783869		hyfR	b2491	-0.31703	0.970424			hyfR	b2491	-0.495574	0.761647		hyfR	b2491	0.260627	0.957531		hyfR	b2491	0.200866	0.920977			hyfR	b2491	-0.207961	0.969807		hyfR	b2491	-0.195892	0.904347		hyfR	b2491	-0.159863	0.990197
hyi	b0508	2.33606	NA		hyi	b0508	0.241616	NA		hyi	b0508	-0.588921	NA			hyi	b0508	-0.249159	0.945684		hyi	b0508	-0.830287	NA		hyi	b0508	-2.25347	NA			hyi	b0508	-0.238871	0.974961		hyi	b0508	0.200402	NA		hyi	b0508	0.168869	0.990197
hypA	b2726	-1.02611	0.899307		hypA	b2726	-0.607545	0.891641		hypA	b2726	0.37046	0.98145			hypA	b2726	0.173616	0.971154		hypA	b2726	-2.36049	0.476187		hypA	b2726	-2.26523	0.531694			hypA	b2726	-0.824321	0.895757		hypA	b2726	-0.349935	0.926097		hypA	b2726	-0.453105	0.990197
hypB	b2727	-1.12869	0.709884		hypB	b2727	0.660452	0.776811		hypB	b2727	-1.066	0.902741			hypB	b2727	-0.552738	0.810874		hypB	b2727	-0.830155	0.842729		hypB	b2727	-1.63112	0.501206			hypB	b2727	-0.146445	0.97697		hypB	b2727	-0.517129	0.793545		hypB	b2727	-1.37823	0.984035
hypC	b2728	-1.26713	NA		hypC	b2728	-3.08688	NA		hypC	b2728	-1.88657	NA			hypC	b2728	1.12532	NA		hypC	b2728	-1.99866	NA		hypC	b2728	-2.31449	NA			hypC	b2728	-0.753688	0.943802		hypC	b2728	-1.9721	NA		hypC	b2728	-1.13137	0.986829
hypD	b2729	-0.352638	0.897238		hypD	b2729	-0.344967	0.789561		hypD	b2729	-0.292712	0.970424			hypD	b2729	0.0615086	0.966723		hypD	b2729	-0.396148	0.896451		hypD	b2729	-0.487215	0.705859			hypD	b2729	-0.298488	0.895757		hypD	b2729	0.0668981	0.959995		hypD	b2729	0.0386991	0.990946
hypE	b2730	-0.202776	0.956467		hypE	b2730	-0.129879	0.939433		hypE	b2730	0.0614301	0.990431			hypE	b2730	0.260921	0.827058		hypE	b2730	-0.282342	0.926164		hypE	b2730	-0.508746	0.604315			hypE	b2730	-0.285079	0.895757		hypE	b2730	0.194779	0.867663		hypE	b2730	0.446073	0.984035
hypF	b2712	0.788466	0.768814		hypF	b2712	0.130197	0.956819		hypF	b2712	-0.669549	0.886807			hypF	b2712	0.329788	0.838099		hypF	b2712	0.0247913	0.993469		hypF	b2712	-0.717229	0.637345			hypF	b2712	-0.159875	0.973152		hypF	b2712	-0.0707218	0.962598		hypF	b2712	-0.0975304	0.990197
hypT	b4327	-0.337054	0.915699		hypT	b4327	-0.341479	0.790456		hypT	b4327	-0.855592	0.753165			hypT	b4327	-0.405315	0.72068		hypT	b4327	-0.106663	0.973619		hypT	b4327	-1.29516	0.259818			hypT	b4327	-0.441747	0.801231		hypT	b4327	-0.612936	0.444991		hypT	b4327	-0.731126	0.984035
hyuA	b2873	0.962811	0.832032		hyuA	b2873	0.483962	0.873675		hyuA	b2873	1.14677	0.787253			hyuA	b2873	-0.44748	0.838099		hyuA	b2873	-0.590174	0.918257		hyuA	b2873	1.22976	0.579247			hyuA	b2873	0.161643	0.974961		hyuA	b2873	-0.652405	0.73564		hyuA	b2873	0.834462	0.986829
iaaA	b0828	-0.255646	0.956573		iaaA	b0828	1.12236	0.221003		iaaA	b0828	1.04865	0.470886			iaaA	b0828	-0.869993	0.42985		iaaA	b0828	0.576311	0.839957		iaaA	b0828	1.00489	0.319549			iaaA	b0828	-0.718789	0.712383		iaaA	b0828	-0.456096	0.713701		iaaA	b0828	0.239383	0.989937
iadA	b4328	0.289547	0.946716		iadA	b4328	-0.266462	0.876284		iadA	b4328	-0.642254	0.868058			iadA	b4328	-0.00321997	0.99934		iadA	b4328	-0.739068	0.691829		iadA	b4328	-2.21417	0.00860321			iadA	b4328	0.2189	0.946075		iadA	b4328	-0.757356	0.404427		iadA	b4328	-0.235727	0.989937
iap	b2753	0.478829	0.870971		iap	b2753	0.202682	0.916459		iap	b2753	0.701814	0.792654			iap	b2753	-0.102533	0.94415		iap	b2753	-0.884206	0.538121		iap	b2753	0.453694	0.766523			iap	b2753	0.118139	0.973152		iap	b2753	-0.879593	0.274867		iap	b2753	0.131551	0.990197
ibaG	b3190	0.256171	0.957396		ibaG	b3190	0.623428	0.610848		ibaG	b3190	0.049275	0.99551			ibaG	b3190	0.0700999	0.971905		ibaG	b3190	-0.104559	0.978051		ibaG	b3190	0.333714	0.826771			ibaG	b3190	-0.251478	0.94345		ibaG	b3190	0.452723	0.711935		ibaG	b3190	-0.29021	0.989491
ibpA	b3687	0.473824	0.918361		ibpA	b3687	0.203985	0.935398		ibpA	b3687	0.232405	0.972462			ibpA	b3687	0.257953	0.896175		ibpA	b3687	-0.915955	0.693337		ibpA	b3687	-0.449135	0.780358			ibpA	b3687	0.197456	0.973152		ibpA	b3687	0.505795	0.739808		ibpA	b3687	0.284617	0.989937
ibpB	b3686	-0.11051	0.984662		ibpB	b3686	1.05737	0.495922		ibpB	b3686	-0.417512	0.970424			ibpB	b3686	1.09701	0.649454		ibpB	b3686	-1.34258	0.494571		ibpB	b3686	-1.8027	0.217785			ibpB	b3686	0.585907	0.905836		ibpB	b3686	0.903665	0.519841		ibpB	b3686	-0.201777	0.990197
ibsA	b4667	0.648011	0.902536		ibsA	b4667	-0.00110449	0.999436		ibsA	b4667	0.677414	0.933708			ibsA	b4667	-0.204974	0.934899		ibsA	b4667	-1.36924	0.625512		ibsA	b4667	0.557531	0.809027			ibsA	b4667	-0.484958	0.914188		ibsA	b4667	1.06327	0.540535		ibsA	b4667	-0.389738	0.989937
ibsB	b4668	2.21317	0.63005		ibsB	b4668	0.482187	0.861612		ibsB	b4668	1.18885	0.757734			ibsB	b4668	1.15071	0.625862		ibsB	b4668	-1.06435	0.748527		ibsB	b4668	0.324943	0.88698			ibsB	b4668	0.0668332	0.992717		ibsB	b4668	1.18098	0.451126		ibsB	b4668	-0.228305	0.989937
ibsC	b4665	1.24875	0.631987		ibsC	b4665	-0.36171	0.892952		ibsC	b4665	1.19763	0.677699			ibsC	b4665	1.79	0.195854		ibsC	b4665	-0.668275	0.900858		ibsC	b4665	0.909929	0.592732			ibsC	b4665	0.499345	0.911012		ibsC	b4665	2.13289	0.065484		ibsC	b4665	0.866165	0.984035
ibsD	b4664	0.595546	0.896742		ibsD	b4664	0.330738	0.895929		ibsD	b4664	1.65401	0.281746			ibsD	b4664	0.410914	0.844891		ibsD	b4664	-1.40351	0.503783		ibsD	b4664	1.44518	0.295937			ibsD	b4664	-0.429812	0.918262		ibsD	b4664	1.66376	0.164803		ibsD	b4664	0.7461	0.984035
ibsE	b4666	1.37862	0.459639		ibsE	b4666	-0.784833	0.607271		ibsE	b4666	0.645826	0.90128			ibsE	b4666	1.66244	0.134077		ibsE	b4666	-1.55965	0.258		ibsE	b4666	1.20287	0.395548			ibsE	b4666	0.729915	0.769217		ibsE	b4666	0.742106	0.6119		ibsE	b4666	0.216558	0.989937
icd	b1136	0.635374	0.819244		icd	b1136	-0.696416	0.59032		icd	b1136	0.233579	0.972462			icd	b1136	-0.150528	0.934899		icd	b1136	0.668388	0.821193		icd	b1136	1.23921	0.224375			icd	b1136	-0.0942655	0.983058		icd	b1136	-1.48758	0.0833395		icd	b1136	-0.50192	0.986829
icdC	b4519	0.773243	NA		icdC	b4519	-1.36909	NA		icdC	b4519	-0.415791	NA			icdC	b4519	1.62463	NA		icdC	b4519	-1.49011	NA		icdC	b4519	0.995675	NA			icdC	b4519	2.81639	NA		icdC	b4519	-0.288243	NA		icdC	b4519	2.51309	NA
iclR	b4018	-0.438857	0.848761		iclR	b4018	-0.0311647	0.986988		iclR	b4018	0.158181	0.972653			iclR	b4018	-0.980682	0.203733		iclR	b4018	0.41432	0.873323		iclR	b4018	0.646157	0.542537			iclR	b4018	-0.0410617	0.990299		iclR	b4018	0.613602	0.444991		iclR	b4018	-0.201643	0.989937
idi	b2889	-0.190826	0.959917		idi	b2889	-1.0658	0.267793		idi	b2889	-1.07604	0.771918			idi	b2889	0.531869	0.651821		idi	b2889	-0.558138	0.856533		idi	b2889	-0.671508	0.753572			idi	b2889	0.283844	0.914188		idi	b2889	-0.551743	0.641137		idi	b2889	-0.723378	0.986829
idnD	b4267	1.40199	NA		idnD	b4267	1.54931	NA		idnD	b4267	-1.88967	NA			idnD	b4267	0.01218	NA		idnD	b4267	0.929548	NA		idnD	b4267	-1.43658	NA			idnD	b4267	0.15563	0.990299		idnD	b4267	1.87429	NA		idnD	b4267	-3.07241	NA
idnK	b4268	1.09237	0.777685		idnK	b4268	0.73378	0.692638		idnK	b4268	-0.628857	0.957842			idnK	b4268	1.01758	0.564244		idnK	b4268	-0.133758	0.978051		idnK	b4268	-0.320015	0.906737			idnK	b4268	-0.0994772	0.984581		idnK	b4268	-0.415825	0.811156		idnK	b4268	-0.454163	0.989937
idnO	b4266	0.10539	NA		idnO	b4266	0.453284	NA		idnO	b4266	0.0801497	NA			idnO	b4266	0.691485	0.842037		idnO	b4266	-2.00137	NA		idnO	b4266	0.497191	NA			idnO	b4266	0.953678	0.862729		idnO	b4266	-1.1442	NA		idnO	b4266	-0.991864	0.986829
idnR	b4264	-0.2193	0.964381		idnR	b4264	0.22619	0.935398		idnR	b4264	0.0364111	0.996787			idnR	b4264	0.470423	0.798048		idnR	b4264	0.0813481	0.981729		idnR	b4264	1.28543	0.540247			idnR	b4264	-0.101536	0.981489		idnR	b4264	-0.268826	0.885637		idnR	b4264	0.243155	0.989937
idnT	b4265	-0.225597	0.961729		idnT	b4265	-0.463455	0.790456		idnT	b4265	0.832903	0.819838			idnT	b4265	0.0441757	0.982897		idnT	b4265	-0.0646117	0.984426		idnT	b4265	0.127631	0.947394			idnT	b4265	0.542756	0.830194		idnT	b4265	-0.625164	0.627841		idnT	b4265	0.102765	0.990197
ihfA	b1712	0.496516	0.82116		ihfA	b1712	0.539498	0.602161		ihfA	b1712	0.408928	0.903221			ihfA	b1712	0.814666	0.379996		ihfA	b1712	-0.312044	0.926164		ihfA	b1712	-0.466746	0.647399			ihfA	b1712	0.217069	0.943329		ihfA	b1712	-0.0964405	0.940029		ihfA	b1712	0.433992	0.986829
ihfB	b0912	0.525463	0.842926		ihfB	b0912	0.474218	0.726705		ihfB	b0912	0.214646	0.972462			ihfB	b0912	1.52884	0.0589638		ihfB	b0912	-0.284232	0.947562		ihfB	b0912	0.59974	0.599482			ihfB	b0912	0.550709	0.806793		ihfB	b0912	-0.4656	0.699222		ihfB	b0912	0.022117	0.993375
ileS	b0026	0.105105	0.967979		ileS	b0026	0.208352	0.84211		ileS	b0026	-0.198504	0.961197			ileS	b0026	-0.330063	0.687221		ileS	b0026	0.360693	0.839313		ileS	b0026	-0.0479281	0.95769			ileS	b0026	-0.00107724	0.999278		ileS	b0026	0.258211	0.749387		ileS	b0026	-0.108763	0.989937
ileT	b3852	-16.683	0.211166		ileT	b3852	-23.4737	0.00449511		ileT	b3852	6.76431	0.886807			ileT	b3852	-17.6838	0.0817013		ileT	b3852	-12.3449	0.513815		ileT	b3852	-18.7718	0.0563876			ileT	b3852	-17.2765	0.116889		ileT	b3852	-14.2103	0.172567		ileT	b3852	5.74669	0.986829
ileU	b3277	1.65234	0.973724		ileU	b3277	-10.5678	0.427155		ileU	b3277	3.37029	0.970424			ileU	b3277	-0.748107	0.977597		ileU	b3277	-0.170657	0.996222		ileU	b3277	-6.81659	0.652715			ileU	b3277	-7.99096	0.766868		ileU	b3277	-7.33726	0.62795		ileU	b3277	2.51308	0.989937
ileV	b0202	1.40033	0.973724		ileV	b0202	-9.49494	0.357989		ileV	b0202	0.321714	0.996787			ileV	b0202	2.25172	0.895774		ileV	b0202	-0.486662	0.985271		ileV	b0202	-0.68144	0.964237			ileV	b0202	-8.22408	0.665007		ileV	b0202	-7.36609	0.511566		ileV	b0202	2.5131	0.989937
ileX	b3069	0.195821	NA		ileX	b3069	-0.954602	NA		ileX	b3069	0.51026	NA			ileX	b3069	0.416219	0.908214		ileX	b3069	1.57222	NA		ileX	b3069	2.08151	NA			ileX	b3069	0.346743	0.973152		ileX	b3069	0.996995	NA		ileX	b3069	1.53913	0.986829
ileY	b2652	-0.48693	NA		ileY	b2652	-0.960667	NA		ileY	b2652	0.364199	NA			ileY	b2652	0.364452	NA		ileY	b2652	-0.480801	NA		ileY	b2652	0.995666	NA			ileY	b2652	-1.7188	NA		ileY	b2652	0.630749	NA		ileY	b2652	2.51307	NA
ilvA	b3772	-0.335643	0.911252		ilvA	b3772	-0.295919	0.840146		ilvA	b3772	-0.887831	0.538482			ilvA	b3772	-0.229443	0.86323		ilvA	b3772	0.594547	0.772717		ilvA	b3772	0.366383	0.766523			ilvA	b3772	-0.0774236	0.98181		ilvA	b3772	0.0937553	0.94422		ilvA	b3772	0.0412128	0.990561
ilvB	b3671	-0.207037	0.966907		ilvB	b3671	1.67814	0.0702852		ilvB	b3671	1.26147	0.44161			ilvB	b3671	-0.140108	0.944209		ilvB	b3671	1.27632	0.43391		ilvB	b3671	0.962944	0.429511			ilvB	b3671	-0.823277	0.722141		ilvB	b3671	1.90173	0.0285897		ilvB	b3671	0.0312326	0.991522
ilvC	b3774	0.384989	0.944675		ilvC	b3774	-1.96858	0.034809		ilvC	b3774	-1.22561	0.572731			ilvC	b3774	0.391247	0.838099		ilvC	b3774	-0.103111	0.978051		ilvC	b3774	-1.35024	0.276184			ilvC	b3774	-0.841274	0.72339		ilvC	b3774	-4.11282	1.49754e-08		ilvC	b3774	-0.0929541	0.990197
ilvD	b3771	-0.392341	0.902536		ilvD	b3771	-0.153904	0.940017		ilvD	b3771	-0.133613	0.981107			ilvD	b3771	-0.0545171	0.977597		ilvD	b3771	0.883892	0.570172		ilvD	b3771	1.06809	0.256206			ilvD	b3771	0.0144762	0.996275		ilvD	b3771	0.409275	0.734697		ilvD	b3771	0.646637	0.983105
ilvE	b3770	-0.386753	0.870971		ilvE	b3770	0.576746	0.523756		ilvE	b3770	0.12349	0.981107			ilvE	b3770	-0.0954705	0.94415		ilvE	b3770	1.45022	0.0262478		ilvE	b3770	0.562744	0.582877			ilvE	b3770	-0.101111	0.973152		ilvE	b3770	0.240322	0.83022		ilvE	b3770	-0.116399	0.990197
ilvH	b0078	-0.717671	0.898753		ilvH	b0078	0.849912	0.706278		ilvH	b0078	1.68991	0.537585			ilvH	b0078	0.473343	0.855646		ilvH	b0078	-0.582356	0.926164		ilvH	b0078	0.0307087	0.989603			ilvH	b0078	-0.588226	0.903754		ilvH	b0078	-1.56653	0.267678		ilvH	b0078	0.157231	0.990197
ilvI	b0077	-0.429793	0.939493		ilvI	b0077	2.59978	0.00575		ilvI	b0077	2.08237	0.0615914			ilvI	b0077	0.209866	0.92606		ilvI	b0077	0.238649	0.965947		ilvI	b0077	0.67715	0.683863			ilvI	b0077	-0.671087	0.833538		ilvI	b0077	-1.25831	0.300278		ilvI	b0077	0.284017	0.989937
ilvL	b3766	0.865922	0.832032		ilvL	b3766	0.879481	0.676849		ilvL	b3766	3.41277	0.00122561			ilvL	b3766	1.24864	0.490116		ilvL	b3766	-1.39242	0.610552		ilvL	b3766	2.42228	0.0835778			ilvL	b3766	0.2021	0.973152		ilvL	b3766	-0.198702	0.938999		ilvL	b3766	0.495677	0.986829
ilvM	b3769	0.533823	0.9509		ilvM	b3769	0.438957	0.883321		ilvM	b3769	-0.112448	0.991827			ilvM	b3769	0.705314	0.788104		ilvM	b3769	1.34828	0.691829		ilvM	b3769	0.48788	0.855646			ilvM	b3769	0.99833	0.775098		ilvM	b3769	-0.356266	0.882238		ilvM	b3769	-0.075909	0.990561
ilvN	b3670	0.86952	0.87469		ilvN	b3670	0.526854	0.830825		ilvN	b3670	1.83041	0.268342			ilvN	b3670	0.485467	0.851486		ilvN	b3670	0.946481	0.816831		ilvN	b3670	2.23796	0.114337			ilvN	b3670	-0.581606	0.903754		ilvN	b3670	1.52056	0.259192		ilvN	b3670	0.83562	0.984035
ilvX	b4669	0.545645	0.957396		ilvX	b4669	2.81516	0.0735373		ilvX	b4669	1.67544	0.58014			ilvX	b4669	0.481527	0.889644		ilvX	b4669	1.38868	0.691716		ilvX	b4669	1.80275	0.40492			ilvX	b4669	1.12477	0.801231		ilvX	b4669	1.26716	0.449435		ilvX	b4669	0.169216	0.990197
ilvY	b3773	-0.176169	0.961729		ilvY	b3773	-0.346615	0.811407		ilvY	b3773	-0.0522988	0.991918			ilvY	b3773	-0.626357	0.525105		ilvY	b3773	0.463412	0.876651		ilvY	b3773	0.317263	0.839461			ilvY	b3773	-0.362942	0.862729		ilvY	b3773	-0.264323	0.832644		ilvY	b3773	0.330974	0.986829
inaA	b2237	0.369949	0.952141		inaA	b2237	0.485091	0.806553		inaA	b2237	-0.438714	0.958124			inaA	b2237	1.17135	0.425799		inaA	b2237	-0.735267	0.830025		inaA	b2237	-1.31207	0.317386			inaA	b2237	0.306393	0.948197		inaA	b2237	0.591346	0.69557		inaA	b2237	-0.690965	0.984035
infA	b0884	0.544089	0.9178		infA	b0884	0.0820234	0.983103		infA	b0884	-0.124835	0.988459			infA	b0884	-0.43388	0.847556		infA	b0884	-0.150345	0.978051		infA	b0884	-0.439252	0.827527			infA	b0884	-0.363256	0.94345		infA	b0884	1.31939	0.328418		infA	b0884	-0.74667	0.986829
infB	b3168	-0.174728	0.957396		infB	b3168	0.161531	0.919589		infB	b3168	0.151076	0.972653			infB	b3168	-0.845336	0.316541		infB	b3168	-0.214594	0.953016		infB	b3168	0.00462993	0.995895			infB	b3168	-0.590666	0.712383		infB	b3168	0.852612	0.236828		infB	b3168	0.391174	0.986829
infC	b1718	0.352395	0.905168		infC	b1718	-0.539351	0.602161		infC	b1718	-0.204467	0.972462			infC	b1718	-0.238572	0.856251		infC	b1718	-0.835319	0.538121		infC	b1718	-0.0711527	0.951021			infC	b1718	0.133592	0.973152		infC	b1718	0.802597	0.317009		infC	b1718	0.381053	0.986829
insA	b0022	0.717345	0.896742		insA	b0022	-0.445512	0.830825		insA	b0022	-0.841915	0.889948			insA	b0022	0.0108263	0.997215		insA	b0022	-0.2128	0.965947		insA	b0022	0.76142	0.766523			insA	b0022	0.44004	0.910442		insA	b0022	-0.594836	0.677276		insA	b0022	-0.366598	0.989937
insB1	b0021	0.318372	0.956354		insB1	b0021	-0.992152	0.340506		insB1	b0021	-0.962703	0.653495			insB1	b0021	0.339934	0.846512		insB1	b0021	-0.738683	0.760983		insB1	b0021	-0.169288	0.919895			insB1	b0021	0.683055	0.767272		insB1	b0021	-0.623277	0.609697		insB1	b0021	0.192262	0.989937
insD1	b0361	-2.89008	NA		insD1	b0361	2.84368	NA		insD1	b0361	-0.652797	NA			insD1	b0361	-1.00527	NA		insD1	b0361	-1.07321	NA		insD1	b0361	0.995688	NA			insD1	b0361	-1.38028	NA		insD1	b0361	-0.421399	NA		insD1	b0361	-0.663382	NA
insF1	b0299	-1.29484	NA		insF1	b0299	-0.134463	NA		insF1	b0299	-0.175804	NA			insF1	b0299	-0.750974	0.813211		insF1	b0299	2.35011	NA		insF1	b0299	2.93171	NA			insF1	b0299	-0.583224	0.930294		insF1	b0299	1.54164	NA		insF1	b0299	0.789598	0.986829
insG	b4278	-0.142152	0.973724		insG	b4278	-0.0853394	0.972494		insG	b4278	-0.825077	0.889005			insG	b4278	-0.466763	0.772432		insG	b4278	0.0185144	0.99443		insG	b4278	-0.620163	0.773644			insG	b4278	0.109016	0.97697		insG	b4278	-0.291421	0.851573		insG	b4278	-1.03739	0.983105
insH1	b0259	-0.757379	0.776766		insH1	b0259	-0.141633	0.956006		insH1	b0259	0.550785	0.910394			insH1	b0259	-0.755799	0.564244		insH1	b0259	-0.786682	0.710669		insH1	b0259	0.368818	0.839461			insH1	b0259	-0.230537	0.960546		insH1	b0259	-0.863113	0.383723		insH1	b0259	0.759288	0.984035
insI1	b0256	0.699301	0.906545		insI1	b0256	-0.520835	0.854711		insI1	b0256	-1.54444	0.819756			insI1	b0256	0.641655	0.779035		insI1	b0256	-0.157303	0.978051		insI1	b0256	-0.018029	0.995466			insI1	b0256	0.887251	0.771528		insI1	b0256	-0.965958	0.578189		insI1	b0256	-0.921857	0.986829
insJ	b3557	-0.223366	NA		insJ	b3557	-1.35846	NA		insJ	b3557	2.81964	NA			insJ	b3557	0.744503	0.81519		insJ	b3557	-1.63133	NA		insJ	b3557	1.82354	NA			insJ	b3557	0.808178	0.876054		insJ	b3557	-0.846755	NA		insJ	b3557	2.52071	0.675501
insK	b3558	-0.671694	NA		insK	b3558	-0.477519	NA		insK	b3558	-2.53469	NA			insK	b3558	2.09643	NA		insK	b3558	-1.74574	NA		insK	b3558	-3.02542	NA			insK	b3558	-0.154678	0.988008		insK	b3558	-0.750647	NA		insK	b3558	-1.36564	NA
insL1	b0016	-6.02674	NA		insL1	b0016	5.40953	NA		insL1	b0016	3.37025	NA			insL1	b0016	0.364449	NA		insL1	b0016	5.87052	NA		insL1	b0016	0.995657	NA			insL1	b0016	0.254604	NA		insL1	b0016	6.79679	NA		insL1	b0016	2.51305	NA
insM	b4561	-1.91671	NA		insM	b4561	-1.57485	NA		insM	b4561	-1.65418	NA			insM	b4561	0.41802	NA		insM	b4561	1.13471	NA		insM	b4561	0.995687	NA			insM	b4561	0.712716	NA		insM	b4561	-1.27316	NA		insM	b4561	1.24967	NA
insN	b0255	-0.187083	0.969047		insN	b0255	0.0069458	0.996885		insN	b0255	0.310692	0.970424			insN	b0255	-0.229945	0.899655		insN	b0255	-0.918917	0.691829		insN	b0255	0.0602061	0.974071			insN	b0255	-0.362584	0.916195		insN	b0255	-0.192208	0.920184		insN	b0255	0.324117	0.989937
insO	b0257	0.17646	0.97305		insO	b0257	-0.840648	0.589926		insO	b0257	0.890814	0.784372			insO	b0257	-0.303276	0.869689		insO	b0257	-0.645415	0.877302		insO	b0257	1.09095	0.501724			insO	b0257	-0.329682	0.930294		insO	b0257	-1.13463	0.326012		insO	b0257	0.767691	0.984035
insP	b4531	-1.84136	0.477688		insP	b4531	1.09115	0.551515		insP	b4531	1.15826	0.787253			insP	b4531	0.657541	0.838099		insP	b4531	-0.663104	0.887228		insP	b4531	-0.194099	0.934801			insP	b4531	-0.802642	0.843264		insP	b4531	0.621806	0.714864		insP	b4531	1.23513	0.983105
insQ	b1432	-0.205792	0.915699		insQ	b1432	-0.440874	0.462013		insQ	b1432	0.117443	0.972462			insQ	b1432	0.0705285	0.940138		insQ	b1432	0.535518	0.561002		insQ	b1432	0.962627	0.098564			insQ	b1432	0.673417	0.238851		insQ	b1432	0.395784	0.503808		insQ	b1432	0.267895	0.986829
insX	b4505	0.412618	0.956573		insX	b4505	-0.0826157	0.982869		insX	b4505	0.606586	0.955278			insX	b4505	0.0527426	0.983468		insX	b4505	0.249557	0.965947		insX	b4505	-0.289612	0.901533			insX	b4505	0.300219	0.960343		insX	b4505	0.0135683	0.991685		insX	b4505	0.0223368	0.995884
intA	b2622	0.197403	0.95818		intA	b2622	-0.106798	0.964965		intA	b2622	0.145585	0.981107			intA	b2622	0.300777	0.833057		intA	b2622	0.418159	0.905198		intA	b2622	-0.0702364	0.964237			intA	b2622	0.550692	0.763842		intA	b2622	-0.502507	0.641137		intA	b2622	0.363297	0.986829
intB	b4271	-0.467967	0.894032		intB	b4271	0.238332	0.89993		intB	b4271	0.164308	0.981107			intB	b4271	0.643454	0.633071		intB	b4271	-0.508893	0.88464		intB	b4271	0.0611148	0.969594			intB	b4271	-0.0678199	0.988008		intB	b4271	0.0533981	0.97114		intB	b4271	-0.0596697	0.990197
intD	b0537	-0.443043	0.899307		intD	b0537	0.123887	0.956819		intD	b0537	0.41116	0.945679			intD	b0537	-0.741483	0.531158		intD	b0537	-0.0385492	0.985954		intD	b0537	1.40449	0.217785			intD	b0537	-0.609132	0.763842		intD	b0537	-0.0517388	0.970143		intD	b0537	0.358335	0.986829
intE	b1140	0.950109	0.854643		intE	b1140	-2.49843	0.157743		intE	b1140	0.408401	0.972462			intE	b1140	1.25318	0.557076		intE	b1140	-1.94707	0.557289		intE	b1140	0.795095	0.757446			intE	b1140	0.0835838	0.990299		intE	b1140	-2.364	0.169185		intE	b1140	0.436957	0.989937
intF	b0281	0.755581	0.793617		intF	b0281	0.101189	0.965898		intF	b0281	-0.456397	0.933708			intF	b0281	0.47006	0.772432		intF	b0281	-0.981485	0.557289		intF	b0281	0.0420398	0.977986			intF	b0281	0.359304	0.914188		intF	b0281	-0.353892	0.802648		intF	b0281	0.431257	0.986829
intG	b1936	-0.52498	NA		intG	b1936	1.0043	NA		intG	b1936	2.37994	NA			intG	b1936	-0.553309	NA		intG	b1936	0.372042	NA		intG	b1936	0.989617	NA			intG	b1936	-1.25206	NA		intG	b1936	1.33798	NA		intG	b1936	0.309233	NA
intK	b1567	0.241364	NA		intK	b1567	-1.66761	NA		intK	b1567	1.64348	NA			intK	b1567	0.242183	NA		intK	b1567	-1.69141	NA		intK	b1567	3.52124	NA			intK	b1567	0.168872	NA		intK	b1567	-1.25611	NA		intK	b1567	1.38588	NA
intQ	b1579	0.520189	NA		intQ	b1579	1.06444	NA		intQ	b1579	1.8558	NA			intQ	b1579	0.613412	0.847556		intQ	b1579	-0.54349	0.943654		intQ	b1579	1.52955	NA			intQ	b1579	0.698922	0.905836		intQ	b1579	0.50487	NA		intQ	b1579	1.68484	0.9763
intR	b1345	-0.463812	0.952141		intR	b1345	2.01032	0.0306771		intR	b1345	-0.153711	0.984816			intR	b1345	-0.518703	0.827058		intR	b1345	0.130188	0.977318		intR	b1345	-0.948065	0.591536			intR	b1345	-0.162496	0.974961		intR	b1345	0.747705	0.515059		intR	b1345	-0.581864	0.986829
intS	b2349	-0.407937	0.941776		intS	b2349	0.370875	0.893192		intS	b2349	0.132533	0.989896			intS	b2349	-0.388104	0.838099		intS	b2349	-1.00625	0.723752		intS	b2349	-1.07222	0.588696			intS	b2349	-0.358303	0.930294		intS	b2349	-0.715166	0.65936		intS	b2349	0.147739	0.990197
intZ	b2442	-0.154296	0.969047		intZ	b2442	-0.499373	0.691111		intZ	b2442	0.288263	0.970424			intZ	b2442	-0.480042	0.692048		intZ	b2442	0.803534	0.688413		intZ	b2442	0.523294	0.736307			intZ	b2442	-0.337278	0.897492		intZ	b2442	0.321258	0.804272		intZ	b2442	0.0999551	0.990197
iraD	b4326	-0.116266	0.98465		iraD	b4326	-1.25899	0.597001		iraD	b4326	-0.265765	0.981107			iraD	b4326	0.500375	0.842037		iraD	b4326	-1.48194	0.693337		iraD	b4326	-0.585706	0.843069			iraD	b4326	-0.199673	0.973152		iraD	b4326	-0.942536	0.680698		iraD	b4326	-0.091036	0.990561
iraM	b1160	-0.486935	NA		iraM	b1160	2.02018	NA		iraM	b1160	1.91133	NA			iraM	b1160	0.364456	NA		iraM	b1160	2.5294	NA		iraM	b1160	0.995677	NA			iraM	b1160	0.247675	NA		iraM	b1160	1.99333	NA		iraM	b1160	0.253236	NA
iraP	b0382	0.0842789	0.98235		iraP	b0382	-0.34917	0.860115		iraP	b0382	-0.439058	0.955278			iraP	b0382	1.60388	0.131251		iraP	b0382	-0.663395	0.832959		iraP	b0382	1.48606	0.243333			iraP	b0382	0.287605	0.943329		iraP	b0382	-1.08118	0.28649		iraP	b0382	0.398582	0.986829
iscA	b2528	0.121172	0.97305		iscA	b2528	1.73977	0.00365116		iscA	b2528	1.43409	0.0371836			iscA	b2528	-0.775904	0.416849		iscA	b2528	0.528101	0.821528		iscA	b2528	-0.11979	0.920303			iscA	b2528	-0.520857	0.778548		iscA	b2528	0.418959	0.689431		iscA	b2528	-0.0597084	0.990197
iscR	b2531	0.766855	0.672263		iscR	b2531	0.443165	0.743105		iscR	b2531	0.325081	0.958124			iscR	b2531	0.893491	0.399322		iscR	b2531	0.475187	0.885681		iscR	b2531	0.51735	0.652068			iscR	b2531	1.04025	0.384907		iscR	b2531	-0.0560316	0.969976		iscR	b2531	-0.0601816	0.990197
iscS	b2530	0.186781	0.961729		iscS	b2530	1.24137	0.112724		iscS	b2530	0.831808	0.604892			iscS	b2530	-0.349096	0.810404		iscS	b2530	0.801668	0.64246		iscS	b2530	-0.0317928	0.980882			iscS	b2530	0.238359	0.943329		iscS	b2530	0.451162	0.692601		iscS	b2530	-0.0741401	0.990197
iscU	b2529	0.0686348	0.978968		iscU	b2529	1.1153	0.112724		iscU	b2529	1.49222	0.0176582			iscU	b2529	-0.120789	0.933714		iscU	b2529	0.399722	0.895363		iscU	b2529	0.311304	0.777263			iscU	b2529	0.341057	0.890851		iscU	b2529	0.117199	0.931489		iscU	b2529	-0.167285	0.989937
iscX	b2524	0.154024	0.969192		iscX	b2524	0.0643276	0.979564		iscX	b2524	0.718189	0.790609			iscX	b2524	-0.900226	0.408272		iscX	b2524	0.17826	0.965947		iscX	b2524	-0.028236	0.986287			iscX	b2524	-0.477415	0.842214		iscX	b2524	1.37506	0.079095		iscX	b2524	0.324141	0.986829
ispA	b0421	-0.359668	0.924147		ispA	b0421	-0.0805078	0.971812		ispA	b0421	-0.649643	0.851284			ispA	b0421	-0.878278	0.439871		ispA	b0421	-0.400838	0.918257		ispA	b0421	-1.12394	0.283673			ispA	b0421	-0.626086	0.771528		ispA	b0421	0.524352	0.670174		ispA	b0421	-0.482009	0.986829
ispB	b3187	-0.023411	0.985526		ispB	b3187	0.073347	0.952638		ispB	b3187	-0.114627	0.972462			ispB	b3187	-0.0988091	0.904089		ispB	b3187	-0.0246779	0.985162		ispB	b3187	-0.315827	0.647399			ispB	b3187	0.223966	0.86979		ispB	b3187	-0.332897	0.557452		ispB	b3187	-0.46225	0.9763
ispD	b2747	0.194293	0.95818		ispD	b2747	0.36622	0.789561		ispD	b2747	-0.313976	0.970424			ispD	b2747	0.257133	0.851486		ispD	b2747	0.051302	0.984136		ispD	b2747	-0.252318	0.874801			ispD	b2747	-0.0115395	0.996275		ispD	b2747	0.992452	0.196735		ispD	b2747	0.0494296	0.990561
ispE	b1208	-0.837236	0.675248		ispE	b1208	-0.559262	0.692638		ispE	b1208	-0.408923	0.955278			ispE	b1208	-0.455474	0.772432		ispE	b1208	-0.748392	0.75254		ispE	b1208	-0.938191	0.40492			ispE	b1208	-0.637734	0.782974		ispE	b1208	0.178044	0.920352		ispE	b1208	-0.243095	0.989937
ispF	b2746	-0.112047	0.974294		ispF	b2746	-0.151953	0.956819		ispF	b2746	-0.378521	0.970424			ispF	b2746	-0.345075	0.838099		ispF	b2746	-0.242979	0.964701		ispF	b2746	-0.977101	0.577231			ispF	b2746	0.0133381	0.997025		ispF	b2746	0.859976	0.490118		ispF	b2746	-0.342999	0.989937
ispG	b2515	0.18567	0.959917		ispG	b2515	-0.269686	0.865092		ispG	b2515	-0.434868	0.906057			ispG	b2515	-0.203459	0.892533		ispG	b2515	-0.674593	0.719884		ispG	b2515	-0.453787	0.696164			ispG	b2515	0.00162894	0.999278		ispG	b2515	0.197915	0.888246		ispG	b2515	0.0777133	0.990197
ispH	b0029	-0.486176	0.843873		ispH	b0029	0.164748	0.935398		ispH	b0029	-0.0814834	0.988459			ispH	b0029	-0.834813	0.411045		ispH	b0029	-0.595556	0.798847		ispH	b0029	-0.159516	0.902902			ispH	b0029	-0.601938	0.749016		ispH	b0029	0.386991	0.744557		ispH	b0029	0.211654	0.989937
ispU	b0174	-0.206926	0.964568		ispU	b0174	0.106398	0.965898		ispU	b0174	-0.393078	0.958124			ispU	b0174	0.320574	0.855646		ispU	b0174	-0.352846	0.940372		ispU	b0174	-0.618692	0.656743			ispU	b0174	-0.0321697	0.994993		ispU	b0174	0.777913	0.526919		ispU	b0174	-0.627097	0.984035
isrC	b4435	-0.48694	NA		isrC	b4435	-0.906416	NA		isrC	b4435	-0.882058	NA			isrC	b4435	0.36446	NA		isrC	b4435	0.416104	NA		isrC	b4435	0.995687	NA			isrC	b4435	-1.57261	NA		isrC	b4435	-0.577348	NA		isrC	b4435	-0.344977	NA
istR	b4616	-1.84593	NA		istR	b4616	-2.08836	NA		istR	b4616	2.97374	NA			istR	b4616	0.36446	NA		istR	b4616	-1.89145	NA		istR	b4616	2.63868	NA			istR	b4616	1.55624	NA		istR	b4616	-0.294406	NA		istR	b4616	4.28802	NA
ivbL	b3672	-1.33591	0.579314		ivbL	b3672	-0.780691	0.684303		ivbL	b3672	-0.0355437	0.996787			ivbL	b3672	-0.336785	0.890591		ivbL	b3672	-0.924414	0.80648		ivbL	b3672	0.695097	0.70525			ivbL	b3672	-0.552302	0.900256		ivbL	b3672	2.10076	0.0673102		ivbL	b3672	0.454756	0.986829
ivy	b0220	0.0306472	0.993172		ivy	b0220	-0.102277	0.965898		ivy	b0220	0.567175	0.86548			ivy	b0220	0.228154	0.887299		ivy	b0220	-0.829116	0.64246		ivy	b0220	0.411189	0.753572			ivy	b0220	-0.604165	0.763842		ivy	b0220	-0.37094	0.775342		ivy	b0220	0.14864	0.989937
jayE	b1152	-1.13944	NA		jayE	b1152	-2.97676	NA		jayE	b1152	0.969503	NA			jayE	b1152	-1.39006	0.707048		jayE	b1152	-2.14607	NA		jayE	b1152	-0.00440826	NA			jayE	b1152	-2.51036	0.461176		jayE	b1152	-2.1489	NA		jayE	b1152	1.43814	0.983105
katE	b1732	0.693196	0.779976		katE	b1732	0.0353168	0.98732		katE	b1732	0.450027	0.933708			katE	b1732	0.364902	0.822894		katE	b1732	0.73801	0.748527		katE	b1732	0.191846	0.892642			katE	b1732	0.418392	0.890851		katE	b1732	-0.546803	0.665284		katE	b1732	0.409248	0.986829
katG	b3942	-0.162524	0.96293		katG	b3942	1.89036	0.000998929		katG	b3942	1.15166	0.202846			katG	b3942	0.0297476	0.983808		katG	b3942	1.17442	0.183063		katG	b3942	0.906667	0.319549			katG	b3942	0.0258717	0.994672		katG	b3942	0.442842	0.665284		katG	b3942	0.352096	0.986829
kbaY	b3137	-1.04147	NA		kbaY	b3137	-1.1757	NA		kbaY	b3137	0.0632148	NA			kbaY	b3137	0.906536	NA		kbaY	b3137	0.487758	NA		kbaY	b3137	-1.98633	NA			kbaY	b3137	-1.32018	0.830194		kbaY	b3137	0.802116	NA		kbaY	b3137	0.526848	NA
kbaZ	b3132	-0.216279	0.969047		kbaZ	b3132	-0.447028	0.863359		kbaZ	b3132	-0.122193	0.99084			kbaZ	b3132	0.347658	0.869841		kbaZ	b3132	0.247216	0.968219		kbaZ	b3132	-0.55746	0.819937			kbaZ	b3132	-0.189276	0.973152		kbaZ	b3132	-0.60353	0.738789		kbaZ	b3132	0.270422	0.989937
kbl	b3617	-0.373373	0.832032		kbl	b3617	0.391463	0.6581		kbl	b3617	-0.241735	0.958124			kbl	b3617	0.0176924	0.987933		kbl	b3617	0.0489983	0.978051		kbl	b3617	-0.663071	0.381132			kbl	b3617	-0.475967	0.712383		kbl	b3617	0.209546	0.827811		kbl	b3617	-0.29056	0.986829
kch	b1250	0.442816	0.87469		kch	b1250	-0.3191	0.828967		kch	b1250	-1.04357	0.579719			kch	b1250	1.12515	0.203544		kch	b1250	-0.591226	0.772692		kch	b1250	-0.442892	0.780552			kch	b1250	0.228061	0.941029		kch	b1250	-0.253848	0.838614		kch	b1250	-0.764506	0.983105
kdgK	b3526	-0.894353	0.568221		kdgK	b3526	-0.0352313	0.986988		kdgK	b3526	0.331268	0.961197			kdgK	b3526	-0.487855	0.701433		kdgK	b3526	-0.0172487	0.99385		kdgK	b3526	0.228633	0.877108			kdgK	b3526	-0.54999	0.787132		kdgK	b3526	0.0819397	0.95668		kdgK	b3526	-0.141222	0.990197
kdgR	b1827	0.260939	0.957396		kdgR	b1827	0.974212	0.354839		kdgR	b1827	1.02332	0.600229			kdgR	b1827	-0.156523	0.929568		kdgR	b1827	-0.155918	0.971858		kdgR	b1827	0.187318	0.907284			kdgR	b1827	-0.377327	0.903754		kdgR	b1827	0.0158634	0.987524		kdgR	b1827	-0.506294	0.986829
kdgT	b3909	0.251735	0.969047		kdgT	b3909	-1.46873	0.431861		kdgT	b3909	-0.653055	0.964524			kdgT	b3909	0.482967	0.84086		kdgT	b3909	-0.525769	0.947562		kdgT	b3909	-1.20268	0.642981			kdgT	b3909	-0.222585	0.973152		kdgT	b3909	-1.49491	0.371923		kdgT	b3909	-1.17203	0.984035
kdpA	b0698	0.132241	0.985526		kdpA	b0698	0.0481444	0.994331		kdpA	b0698	-1.12503	0.957842			kdpA	b0698	-0.62741	0.892917		kdpA	b0698	-4.9843	0.0279857		kdpA	b0698	-6.28556	0.00703031			kdpA	b0698	0.0371383	0.996275		kdpA	b0698	-1.63489	0.62753		kdpA	b0698	0.326501	0.990197
kdpB	b0697	0.172783	0.984662		kdpB	b0697	-0.259096	0.965898		kdpB	b0697	0.512461	0.972462			kdpB	b0697	-0.647842	0.874181		kdpB	b0697	-4.04275	0.0805812		kdpB	b0697	-3.82979	0.0841474			kdpB	b0697	-0.00356638	0.999278		kdpB	b0697	-1.69298	0.55654		kdpB	b0697	0.695936	0.989491
kdpC	b0696	-0.340111	0.957396		kdpC	b0696	-0.375641	0.893192		kdpC	b0696	-0.709018	0.933708			kdpC	b0696	0.155759	0.952238		kdpC	b0696	-1.57313	0.503213		kdpC	b0696	-2.28563	0.102418			kdpC	b0696	0.0523194	0.994672		kdpC	b0696	-0.465003	0.832644		kdpC	b0696	-0.477994	0.989491
kdpD	b0695	-0.46031	0.894032		kdpD	b0695	0.378895	0.827267		kdpD	b0695	0.0567748	0.991827			kdpD	b0695	-0.479832	0.739901		kdpD	b0695	-0.864013	0.673417		kdpD	b0695	-2.13503	0.00703031			kdpD	b0695	-0.18645	0.973152		kdpD	b0695	0.0397308	0.976812		kdpD	b0695	0.362552	0.986829
kdpE	b0694	-0.348954	0.952141		kdpE	b0694	0.124571	0.965898		kdpE	b0694	-1.03382	0.851284			kdpE	b0694	0.453298	0.81242		kdpE	b0694	-0.212072	0.967088		kdpE	b0694	-2.45088	0.102659			kdpE	b0694	0.179066	0.973152		kdpE	b0694	0.00184084	0.999689		kdpE	b0694	-0.520852	0.989319
kdpF	b4513	-0.486938	0.984662		kdpF	b4513	1.80907	0.894346		kdpF	b4513	3.37033	0.933708			kdpF	b4513	0.364458	0.980787		kdpF	b4513	-4.98234	0.75254		kdpF	b4513	-5.57245	0.495397			kdpF	b4513	-1.69485	0.960546		kdpF	b4513	-1.04009	0.931489		kdpF	b4513	0.405374	0.990197
kdsA	b1215	0.0127596	0.997717		kdsA	b1215	0.637286	0.426175		kdsA	b1215	0.580185	0.75354			kdsA	b1215	-0.96092	0.175657		kdsA	b1215	-0.0302769	0.985954		kdsA	b1215	0.216109	0.841916			kdsA	b1215	-0.358372	0.856177		kdsA	b1215	0.264425	0.802648		kdsA	b1215	0.589904	0.9763
kdsB	b0918	0.0827873	0.973724		kdsB	b0918	-0.374558	0.688871		kdsB	b0918	-0.351929	0.928931			kdsB	b0918	-0.448255	0.580134		kdsB	b0918	0.243575	0.931415		kdsB	b0918	-0.588834	0.531022			kdsB	b0918	-0.188283	0.93347		kdsB	b0918	-0.185328	0.856651		kdsB	b0918	-0.321739	0.986829
kdsC	b3198	0.67067	0.535277		kdsC	b3198	0.0449303	0.977858		kdsC	b3198	0.43878	0.819756			kdsC	b3198	0.693339	0.316541		kdsC	b3198	-0.339976	0.869908		kdsC	b3198	0.372546	0.662229			kdsC	b3198	0.324689	0.833538		kdsC	b3198	-0.0270295	0.975887		kdsC	b3198	0.297319	0.986829
kdsD	b3197	0.019567	0.994051		kdsD	b3197	0.285212	0.75067		kdsD	b3197	-0.238853	0.957842			kdsD	b3197	0.0528428	0.961801		kdsD	b3197	-0.207692	0.935815		kdsD	b3197	-0.933146	0.117883			kdsD	b3197	0.0400988	0.988008		kdsD	b3197	-0.157159	0.867663		kdsD	b3197	-0.205522	0.986829
kduD	b2842	0.363967	0.956467		kduD	b2842	1.44453	0.426539		kduD	b2842	-0.342245	0.972996			kduD	b2842	0.854286	0.607292		kduD	b2842	0.556223	0.918257		kduD	b2842	-0.463283	0.87401			kduD	b2842	-0.0990363	0.983058		kduD	b2842	-0.382288	0.843738		kduD	b2842	-1.24531	0.984035
kduI	b2843	-0.6544	0.901714		kduI	b2843	0.368765	0.886553		kduI	b2843	0.831874	0.855479			kduI	b2843	2.81884	0.249857		kduI	b2843	0.00933347	0.997654		kduI	b2843	0.869531	0.655433			kduI	b2843	0.243511	0.973152		kduI	b2843	-0.404695	0.822587		kduI	b2843	0.27253	0.989937
kefB	b3350	-0.281304	0.941776		kefB	b3350	-0.173123	0.926571		kefB	b3350	-0.0821298	0.988459			kefB	b3350	0.0310251	0.983808		kefB	b3350	0.301388	0.937985		kefB	b3350	0.677803	0.554313			kefB	b3350	0.0727219	0.983935		kefB	b3350	-0.369453	0.75388		kefB	b3350	-0.0326838	0.991513
kefC	b0047	-0.935712	0.0978613		kefC	b0047	-0.346606	0.759887		kefC	b0047	-0.207511	0.972462			kefC	b0047	-0.619872	0.331201		kefC	b0047	0.0639763	0.978051		kefC	b0047	-0.492229	0.724039			kefC	b0047	-1.08136	0.0135044		kefC	b0047	-0.531365	0.498077		kefC	b0047	-0.103419	0.990197
kefF	b0046	-0.262078	0.964381		kefF	b0046	-0.244855	0.9479		kefF	b0046	0.31587	0.972462			kefF	b0046	0.489	0.827058		kefF	b0046	0.179505	0.978051		kefF	b0046	0.0393674	0.986489			kefF	b0046	-0.162039	0.974961		kefF	b0046	-0.860902	0.641137		kefF	b0046	1.15162	0.983105
kefG	b3351	1.31129	0.459639		kefG	b3351	-0.156895	0.951476		kefG	b3351	0.12492	0.98145			kefG	b3351	0.294155	0.855646		kefG	b3351	-0.379351	0.928231		kefG	b3351	0.409571	0.804079			kefG	b3351	0.572919	0.806793		kefG	b3351	-1.03869	0.274867		kefG	b3351	0.146043	0.990197
kgtP	b2587	0.413325	0.848761		kgtP	b2587	0.416199	0.69573		kgtP	b2587	0.427932	0.895325			kgtP	b2587	0.233036	0.851284		kgtP	b2587	0.180606	0.96163		kgtP	b2587	0.53068	0.554945			kgtP	b2587	0.23023	0.93347		kgtP	b2587	-0.251546	0.824166		kgtP	b2587	-0.0663394	0.990197
kptA	b4331	-0.0157889	0.997717		kptA	b4331	0.933016	0.447809		kptA	b4331	0.30121	0.970424			kptA	b4331	0.0520208	0.981884		kptA	b4331	0.326038	0.943283		kptA	b4331	0.309781	0.865851			kptA	b4331	0.559303	0.842214		kptA	b4331	-0.105858	0.950409		kptA	b4331	-0.0994398	0.990197
kup	b3747	-0.19975	0.946716		kup	b3747	0.238795	0.830825		kup	b3747	0.369944	0.902741			kup	b3747	0.129856	0.899655		kup	b3747	-0.230575	0.928231		kup	b3747	0.233278	0.831013			kup	b3747	-0.133955	0.962434		kup	b3747	0.504765	0.443456		kup	b3747	0.162247	0.989937
lacA	b0342	-1.84953	NA		lacA	b0342	0.342728	NA		lacA	b0342	-0.877966	NA			lacA	b0342	1.24828	NA		lacA	b0342	2.55957	NA		lacA	b0342	-1.9871	NA			lacA	b0342	-0.567417	NA		lacA	b0342	2.2024	NA		lacA	b0342	0.460112	NA
lacI	b0345	-0.561868	0.668017		lacI	b0345	0.00596962	0.996542		lacI	b0345	0.138002	0.972996			lacI	b0345	-0.492344	0.555201		lacI	b0345	0.0288965	0.985954		lacI	b0345	-0.121758	0.918274			lacI	b0345	-0.235499	0.910442		lacI	b0345	-0.190969	0.843738		lacI	b0345	0.389301	0.986829
lacY	b0343	-1.53027	NA		lacY	b0343	-1.2124	NA		lacY	b0343	-0.230537	NA			lacY	b0343	-1.98783	0.557076		lacY	b0343	-0.804169	NA		lacY	b0343	0.585759	NA			lacY	b0343	-2.11215	0.665007		lacY	b0343	-0.740259	NA		lacY	b0343	0.278655	0.990197
lacZ	b0344	-1.69343	0.477688		lacZ	b0344	0.0541395	0.986988		lacZ	b0344	0.457159	0.970424			lacZ	b0344	-0.548944	0.830473		lacZ	b0344	0.25412	0.965947		lacZ	b0344	-0.013404	0.994792			lacZ	b0344	-1.35265	0.548087		lacZ	b0344	0.484124	0.79577		lacZ	b0344	0.904182	0.984035
lafU	b0230	-1.05745	0.7838		lafU	b0230	-1.69701	0.392949		lafU	b0230	0.0691672	0.996787			lafU	b0230	-0.86788	0.664422		lafU	b0230	-1.37701	0.748527		lafU	b0230	0.0648064	0.982142			lafU	b0230	-0.0529889	0.994672		lafU	b0230	-1.28078	0.533615		lafU	b0230	0.238637	0.990197
lamB	b4036	-0.306029	0.966999		lamB	b4036	-1.10289	0.65486		lamB	b4036	0.331217	0.974861			lamB	b4036	-1.26321	0.557076		lamB	b4036	-0.43172	0.96163		lamB	b4036	-0.118701	0.966519			lamB	b4036	-3.06453	0.0225834		lamB	b4036	-0.379909	0.898254		lamB	b4036	0.358105	0.989937
ldcA	b1192	0.492936	0.777063		ldcA	b1192	0.073244	0.965898		ldcA	b1192	0.38336	0.897309			ldcA	b1192	0.148865	0.892533		ldcA	b1192	-0.0664676	0.978051		ldcA	b1192	0.538604	0.571643			ldcA	b1192	0.569138	0.55253		ldcA	b1192	-0.818756	0.123068		ldcA	b1192	0.0740566	0.990197
ldcC	b0186	0.199629	0.956467		ldcC	b0186	-0.36416	0.728568		ldcC	b0186	0.422158	0.889005			ldcC	b0186	0.391743	0.6907		ldcC	b0186	0.267811	0.929668		ldcC	b0186	0.408704	0.672125			ldcC	b0186	-0.0850504	0.974961		ldcC	b0186	-0.575465	0.451126		ldcC	b0186	-0.177583	0.989937
ldhA	b1380	1.0812	0.0488605		ldhA	b1380	0.690972	0.248103		ldhA	b1380	0.673897	0.52335			ldhA	b1380	0.018827	0.985737		ldhA	b1380	-0.178557	0.947635		ldhA	b1380	-0.413358	0.59636			ldhA	b1380	0.146482	0.952074		ldhA	b1380	-0.550996	0.359012		ldhA	b1380	0.119339	0.989937
ldrA	b4419	0.384368	0.953993		ldrA	b4419	0.105514	0.970433		ldrA	b4419	-0.0990888	0.99084			ldrA	b4419	1.42397	0.340591		ldrA	b4419	0.16287	0.973797		ldrA	b4419	0.595955	0.771766			ldrA	b4419	0.562324	0.870463		ldrA	b4419	1.05766	0.391229		ldrA	b4419	0.6343	0.986829
ldrB	b4421	0.562291	0.957396		ldrB	b4421	1.01523	0.697568		ldrB	b4421	0.00371148	0.999069			ldrB	b4421	-0.0178108	0.997215		ldrB	b4421	-0.435024	0.957531		ldrB	b4421	-0.355509	0.896636			ldrB	b4421	-0.860883	0.871232		ldrB	b4421	0.678915	0.778778		ldrB	b4421	0.730261	0.986829
ldrC	b4423	0.109898	0.982291		ldrC	b4423	0.128178	0.965898		ldrC	b4423	-0.810415	0.903221			ldrC	b4423	0.37726	0.864524		ldrC	b4423	0.0572998	0.98554		ldrC	b4423	-1.13683	0.554313			ldrC	b4423	0.263342	0.967543		ldrC	b4423	0.701774	0.641137		ldrC	b4423	-0.740119	0.986829
ldrD	b4453	-1.02176	0.555289		ldrD	b4453	-1.83899	0.0981289		ldrD	b4453	-0.378662	0.970424			ldrD	b4453	0.11759	0.949696		ldrD	b4453	-0.837981	0.821528		ldrD	b4453	-0.36349	0.857994			ldrD	b4453	0.19469	0.972628		ldrD	b4453	0.587491	0.744714		ldrD	b4453	0.465429	0.986829
ldtA	b1990	0.671236	0.631987		ldtA	b1990	-0.516547	0.545316		ldtA	b1990	0.0971948	0.98124			ldtA	b1990	0.774793	0.322766		ldtA	b1990	-0.0862628	0.977318		ldtA	b1990	0.0220351	0.986062			ldtA	b1990	0.327696	0.862729		ldtA	b1990	-0.229497	0.825881		ldtA	b1990	0.25499	0.986829
ldtB	b0819	0.0142397	0.997717		ldtB	b0819	0.71004	0.563066		ldtB	b0819	-0.216541	0.972462			ldtB	b0819	0.15503	0.931073		ldtB	b0819	-0.88762	0.64246		ldtB	b0819	-1.63914	0.0681905			ldtB	b0819	0.426329	0.890851		ldtB	b0819	0.59423	0.626073		ldtB	b0819	0.0728416	0.990197
ldtC	b1113	-0.0125022	0.997717		ldtC	b1113	-0.647584	0.673175		ldtC	b1113	0.449446	0.957842			ldtC	b1113	0.360255	0.838099		ldtC	b1113	-1.52643	0.223738		ldtC	b1113	-1.13765	0.382572			ldtC	b1113	0.0184629	0.996275		ldtC	b1113	-0.415155	0.794172		ldtC	b1113	0.00469546	0.997867
ldtD	b0925	0.301306	0.915699		ldtD	b0925	-0.319611	0.79759		ldtD	b0925	0.572194	0.784372			ldtD	b0925	0.221485	0.85698		ldtD	b0925	-0.222307	0.951056		ldtD	b0925	0.635484	0.46758			ldtD	b0925	0.174822	0.961838		ldtD	b0925	-0.559659	0.516073		ldtD	b0925	0.482222	0.984035
ldtE	b1678	0.909653	0.55472		ldtE	b1678	0.206768	0.906955		ldtE	b1678	0.566607	0.851284			ldtE	b1678	1.19669	0.183065		ldtE	b1678	0.135655	0.971858		ldtE	b1678	0.109636	0.932225			ldtE	b1678	0.944263	0.452134		ldtE	b1678	-0.366665	0.775051		ldtE	b1678	0.675011	0.983105
lepA	b2569	0.0963582	0.96293		lepA	b2569	-0.0454116	0.967304		lepA	b2569	0.0480962	0.988459			lepA	b2569	-0.0815388	0.924691		lepA	b2569	0.0728759	0.971858		lepA	b2569	0.0772277	0.918979			lepA	b2569	0.208901	0.890851		lepA	b2569	0.301073	0.618551		lepA	b2569	0.10688	0.989937
lepB	b2568	-0.169923	0.957396		lepB	b2568	-0.131366	0.936288		lepB	b2568	0.076094	0.988459			lepB	b2568	-0.278394	0.812257		lepB	b2568	-0.528305	0.760983		lepB	b2568	-0.00657073	0.99458			lepB	b2568	0.0523254	0.988008		lepB	b2568	0.231957	0.834573		lepB	b2568	0.0361337	0.990561
leuA	b0074	0.168798	0.97305		leuA	b0074	2.95428	9.23672e-05		leuA	b0074	2.82386	0.000170426			leuA	b0074	0.155424	0.941541		leuA	b0074	1.70159	0.142228		leuA	b0074	1.68185	0.0965154			leuA	b0074	-0.227447	0.969807		leuA	b0074	0.825854	0.51144		leuA	b0074	0.302945	0.989782
leuB	b0073	0.595997	0.870971		leuB	b0073	3.00246	3.87769e-05		leuB	b0073	2.49563	0.00114368			leuB	b0073	0.355451	0.847525		leuB	b0073	1.87642	0.0526449		leuB	b0073	2.03563	0.0267604			leuB	b0073	0.0657575	0.990299		leuB	b0073	0.977749	0.377129		leuB	b0073	0.48082	0.986829
leuC	b0072	-0.576596	0.848761		leuC	b0072	2.9827	8.67675e-06		leuC	b0072	2.6643	6.88439e-05			leuC	b0072	-0.19332	0.91265		leuC	b0072	1.69215	0.0664553		leuC	b0072	1.3833	0.148533			leuC	b0072	-0.730065	0.738048		leuC	b0072	0.895968	0.381044		leuC	b0072	0.731297	0.983105
leuD	b0071	0.0129004	0.997717		leuD	b0071	2.52695	4.6842e-06		leuD	b0071	2.17311	5.3315e-05			leuD	b0071	0.731008	0.517855		leuD	b0071	1.47921	0.0286992		leuD	b0071	1.32797	0.0834783			leuD	b0071	-0.48399	0.812578		leuD	b0071	0.888232	0.223948		leuD	b0071	0.977967	0.803021
leuE	b1798	0.768368	0.908738		leuE	b1798	1.19171	0.502054		leuE	b1798	-2.25947	0.771918			leuE	b1798	0.613764	0.818187		leuE	b1798	0.0485883	0.988901		leuE	b1798	-2.22711	0.540247			leuE	b1798	0.926332	0.801231		leuE	b1798	1.43945	0.293436		leuE	b1798	-1.9952	0.984035
leuL	b0075	0.948018	0.843873		leuL	b0075	1.78133	0.314051		leuL	b0075	3.13421	0.0207454			leuL	b0075	3.49998	0.0223466		leuL	b0075	-0.141255	0.978051		leuL	b0075	2.58816	0.141498			leuL	b0075	1.20423	0.722141		leuL	b0075	0.801047	0.710984		leuL	b0075	1.17592	0.983105
leuO	b0076	-1.32701	0.675248		leuO	b0076	0.309019	0.935398		leuO	b0076	-2.52529	0.693566			leuO	b0076	-0.241108	0.934899		leuO	b0076	-0.531198	0.937985		leuO	b0076	-2.13808	0.55919			leuO	b0076	-0.551099	0.91343		leuO	b0076	0.779901	0.702101		leuO	b0076	-1.93543	0.984035
leuP	b4369	-0.343857	0.946716		leuP	b4369	0.281736	0.886553		leuP	b4369	0.599187	0.903221			leuP	b4369	-0.0822911	0.969182		leuP	b4369	0.105175	0.978051		leuP	b4369	-0.139661	0.935115			leuP	b4369	0.746241	0.738048		leuP	b4369	2.27941	0.00346411		leuP	b4369	0.497833	0.986829
leuQ	b4370	0.0654023	0.985526		leuQ	b4370	-0.286621	0.920073		leuQ	b4370	-0.498906	0.958124			leuQ	b4370	-0.892564	0.624265		leuQ	b4370	-0.650023	0.903624		leuQ	b4370	-1.45737	0.334266			leuQ	b4370	-0.228564	0.973152		leuQ	b4370	2.48505	0.0232059		leuQ	b4370	-0.583424	0.986829
leuS	b0642	-0.173505	0.9178		leuS	b0642	0.0663948	0.952638		leuS	b0642	-0.0749678	0.980494			leuS	b0642	-0.189278	0.795766		leuS	b0642	0.112695	0.96163		leuS	b0642	-0.257125	0.66632			leuS	b0642	-0.0776174	0.973152		leuS	b0642	0.312913	0.547084		leuS	b0642	0.158285	0.986829
leuT	b3798	0.804432	0.915699		leuT	b3798	0.327999	0.942616		leuT	b3798	0.0156067	0.998455			leuT	b3798	0.983325	0.731098		leuT	b3798	-0.04596	0.993469		leuT	b3798	-0.526934	0.866993			leuT	b3798	0.0903838	0.992717		leuT	b3798	1.16334	0.62877		leuT	b3798	-0.808085	0.986829
leuU	b3174	-0.207712	NA		leuU	b3174	-0.157972	NA		leuU	b3174	2.65012	NA			leuU	b3174	4.20689	0.0456602		leuU	b3174	0.874988	0.937985		leuU	b3174	0.313094	NA			leuU	b3174	2.46809	0.321137		leuU	b3174	2.21713	NA		leuU	b3174	1.69004	0.984035
leuV	b4368	0.706747	0.82581		leuV	b4368	0.601769	0.710503		leuV	b4368	1.42614	0.300307			leuV	b4368	-0.452842	0.797974		leuV	b4368	0.178179	0.971858		leuV	b4368	1.62159	0.17839			leuV	b4368	0.803727	0.722141		leuV	b4368	1.32304	0.198067		leuV	b4368	1.14029	0.959079
leuW	b0672	-0.145502	0.974994		leuW	b0672	0.547892	0.830825		leuW	b0672	-0.208104	0.981107			leuW	b0672	-0.304058	0.902837		leuW	b0672	-0.177678	0.977318		leuW	b0672	-1.31357	0.428625			leuW	b0672	0.0689292	0.992717		leuW	b0672	2.00133	0.119401		leuW	b0672	-0.867495	0.984035
leuX	b4270	0.220909	0.969047		leuX	b4270	-0.557055	0.762248		leuX	b4270	0.945421	0.762309			leuX	b4270	1.37714	0.360237		leuX	b4270	-1.08306	0.64246		leuX	b4270	0.41807	0.818158			leuX	b4270	0.349594	0.942813		leuX	b4270	2.35737	0.0189092		leuX	b4270	0.314897	0.989937
leuZ	b1909	0.802248	0.793347		leuZ	b1909	0.363776	0.862917		leuZ	b1909	0.885109	0.771918			leuZ	b1909	0.674674	0.668312		leuZ	b1909	-0.0741729	0.982147		leuZ	b1909	0.400977	0.813193			leuZ	b1909	0.459855	0.896945		leuZ	b1909	2.06315	0.023552		leuZ	b1909	0.263062	0.989937
lexA	b4043	0.209055	0.957396		lexA	b4043	-0.940093	0.283292		lexA	b4043	0.272056	0.970424			lexA	b4043	-0.178407	0.899655		lexA	b4043	-0.634965	0.772717		lexA	b4043	-0.0930348	0.942405			lexA	b4043	0.0829216	0.981489		lexA	b4043	-0.57079	0.590004		lexA	b4043	0.0534655	0.990197
lfhA	b0229	-0.209211	0.963401		lfhA	b0229	-0.403637	0.840146		lfhA	b0229	-0.271114	0.972462			lfhA	b0229	0.0837614	0.967401		lfhA	b0229	-0.50695	0.905198		lfhA	b0229	0.512471	0.800322			lfhA	b0229	-0.0320096	0.994672		lfhA	b0229	-0.612914	0.651069		lfhA	b0229	0.122791	0.990197
lgt	b2828	0.0505763	0.984662		lgt	b2828	-0.000723422	0.999411		lgt	b2828	-0.564593	0.846925			lgt	b2828	0.800147	0.399322		lgt	b2828	0.376797	0.903624		lgt	b2828	-0.668465	0.523041			lgt	b2828	0.489562	0.793305		lgt	b2828	0.0567133	0.963309		lgt	b2828	-0.256473	0.989491
lhgO	b2660	1.06196	0.532262		lhgO	b2660	0.869587	0.446426		lhgO	b2660	0.39799	0.957842			lhgO	b2660	1.60948	0.0741467		lhgO	b2660	0.858749	0.691829		lhgO	b2660	1.11037	0.292992			lhgO	b2660	1.14868	0.392649		lhgO	b2660	-0.49966	0.709881		lhgO	b2660	0.839974	0.9763
lhr	b1653	-0.34012	0.903394		lhr	b1653	-0.66952	0.448933		lhr	b1653	-0.473455	0.889005			lhr	b1653	-0.468803	0.652874		lhr	b1653	-0.15452	0.965947		lhr	b1653	-0.733545	0.425667			lhr	b1653	-0.117624	0.973152		lhr	b1653	-1.18973	0.0673102		lhr	b1653	0.120301	0.990197
ligA	b2411	-0.365253	0.760291		ligA	b2411	0.610086	0.205649		ligA	b2411	0.0306528	0.991827			ligA	b2411	-0.460273	0.42651		ligA	b2411	-0.157336	0.941174		ligA	b2411	-0.640264	0.238216			ligA	b2411	-0.629178	0.260858		ligA	b2411	0.436933	0.386449		ligA	b2411	0.228996	0.986829
ligB	b3647	-1.41164	0.302547		ligB	b3647	-0.340306	0.872137		ligB	b3647	-0.386752	0.970424			ligB	b3647	-0.647194	0.651821		ligB	b3647	-0.211919	0.965947		ligB	b3647	-0.483005	0.795137			ligB	b3647	-0.500468	0.858092		ligB	b3647	-0.433325	0.771767		ligB	b3647	-0.0180461	0.995884
ligT	b0147	-0.112891	0.974294		ligT	b0147	-0.128027	0.961435		ligT	b0147	0.103963	0.99084			ligT	b0147	-0.493264	0.703049		ligT	b0147	-0.161804	0.971858		ligT	b0147	-0.636088	0.758036			ligT	b0147	0.0811974	0.983058		ligT	b0147	0.022912	0.985163		ligT	b0147	-0.285496	0.989937
lipA	b0628	0.248551	0.956579		lipA	b0628	-0.081474	0.970433		lipA	b0628	-0.286039	0.970424			lipA	b0628	-0.299481	0.846512		lipA	b0628	0.0826509	0.978051		lipA	b0628	-0.229704	0.86841			lipA	b0628	0.101694	0.97697		lipA	b0628	-0.152615	0.926097		lipA	b0628	-0.980184	0.939857
lipB	b0630	0.256742	0.956467		lipB	b0630	0.491422	0.66274		lipB	b0630	0.41336	0.945679			lipB	b0630	0.586727	0.607292		lipB	b0630	0.168868	0.964932		lipB	b0630	-0.625481	0.618825			lipB	b0630	0.227014	0.943329		lipB	b0630	0.676613	0.413106		lipB	b0630	-0.108884	0.990197
lit	b1139	0.695719	0.914581		lit	b1139	-1.63545	0.490576		lit	b1139	0.598941	0.966987			lit	b1139	0.259267	0.926742		lit	b1139	-1.39624	0.797238		lit	b1139	2.06016	0.445058			lit	b1139	0.238346	0.973152		lit	b1139	-1.46764	0.513721		lit	b1139	1.10113	0.984035
livF	b3454	0.0693026	0.989411		livF	b3454	2.99131	0.0265261		livF	b3454	3.70479	0.00153274			livF	b3454	-0.0748635	0.982897		livF	b3454	1.18135	0.761034		livF	b3454	2.65693	0.0834783			livF	b3454	-0.859674	0.853386		livF	b3454	0.191848	0.940029		livF	b3454	2.265	0.569161
livG	b3455	0.897392	0.896265		livG	b3455	4.42426	0.00169346		livG	b3455	3.76609	0.00771455			livG	b3455	1.73188	0.463229		livG	b3455	1.49203	0.691829		livG	b3455	1.29795	0.550535			livG	b3455	0.901086	0.862729		livG	b3455	-0.254081	0.933885		livG	b3455	0.575041	0.986829
livH	b3457	2.45881	0.6383		livH	b3457	3.06826	0.0444518		livH	b3457	4.51526	0.00047765			livH	b3457	0.498458	0.892277		livH	b3457	0.291317	0.971858		livH	b3457	1.13341	0.613085			livH	b3457	-0.306385	0.973152		livH	b3457	-1.03096	0.647043		livH	b3457	1.49727	0.9763
livJ	b3460	0.239688	0.973724		livJ	b3460	4.91051	3.77026e-05		livJ	b3460	4.47502	0.000131424			livJ	b3460	0.344403	0.908482		livJ	b3460	1.02408	0.851154		livJ	b3460	2.65133	0.091821			livJ	b3460	-0.684804	0.905836		livJ	b3460	-0.572541	0.82661		livJ	b3460	0.7709	0.986829
livK	b3458	0.0635847	0.989411		livK	b3458	4.36345	0.000116348		livK	b3458	4.1534	0.000102184			livK	b3458	1.63341	0.417968		livK	b3458	0.221396	0.973619		livK	b3458	2.6855	0.0608292			livK	b3458	0.179516	0.97697		livK	b3458	-0.561358	0.809287		livK	b3458	1.03628	0.984035
livM	b3456	-0.790147	0.871318		livM	b3456	4.34487	1.85554e-05		livM	b3456	3.49574	0.000380443			livM	b3456	-0.458832	0.855551		livM	b3456	0.856437	0.838709		livM	b3456	1.44383	0.344992			livM	b3456	-0.670997	0.883104		livM	b3456	-0.132343	0.95392		livM	b3456	0.927762	0.984035
lldD	b3605	-0.382644	0.930041		lldD	b3605	-1.43302	0.151813		lldD	b3605	-0.223874	0.972462			lldD	b3605	0.204964	0.908482		lldD	b3605	0.353268	0.941174		lldD	b3605	-0.989375	0.413371			lldD	b3605	-1.14478	0.434453		lldD	b3605	0.181068	0.925136		lldD	b3605	0.522218	0.986829
lldP	b3603	-0.68535	0.870971		lldP	b3603	-1.43192	0.277174		lldP	b3603	-0.52762	0.957248			lldP	b3603	0.315838	0.892533		lldP	b3603	-0.0874355	0.982147		lldP	b3603	-0.70063	0.689991			lldP	b3603	-1.02082	0.712383		lldP	b3603	0.156823	0.941304		lldP	b3603	0.112904	0.990197
lldR	b3604	-1.01316	0.631987		lldR	b3604	-1.77973	0.0707415		lldR	b3604	-0.598032	0.906057			lldR	b3604	-0.350612	0.848924		lldR	b3604	0.174126	0.972127		lldR	b3604	-0.936547	0.509433			lldR	b3604	-1.33644	0.34003		lldR	b3604	0.163848	0.936933		lldR	b3604	-0.00497109	0.997867
lnt	b0657	-0.9478	0.504053		lnt	b0657	-0.679126	0.541806		lnt	b0657	-0.778567	0.752361			lnt	b0657	-0.302797	0.837882		lnt	b0657	-0.741572	0.702788		lnt	b0657	-0.926793	0.402272			lnt	b0657	-0.454307	0.842214		lnt	b0657	-0.0698073	0.962598		lnt	b0657	-0.0546158	0.990197
loiP	b2936	-0.125318	0.974294		loiP	b2936	0.628983	0.656961		loiP	b2936	1.12564	0.514531			loiP	b2936	0.783111	0.564244		loiP	b2936	-1.10184	0.506828		loiP	b2936	0.368613	0.809253			loiP	b2936	-0.166362	0.973152		loiP	b2936	0.35989	0.8151		loiP	b2936	-0.0818676	0.990197
lolA	b0891	-0.145837	0.967179		lolA	b0891	-0.0465347	0.983436		lolA	b0891	-0.259391	0.970424			lolA	b0891	-0.0128408	0.994812		lolA	b0891	0.106299	0.975621		lolA	b0891	-0.111368	0.92674			lolA	b0891	0.241307	0.932551		lolA	b0891	0.39898	0.69945		lolA	b0891	-0.006325	0.997867
lolB	b1209	0.177052	0.956467		lolB	b1209	-0.280826	0.796355		lolB	b1209	0.146272	0.972462			lolB	b1209	0.0545936	0.961801		lolB	b1209	0.212579	0.942525		lolB	b1209	0.654872	0.474998			lolB	b1209	0.0696643	0.975939		lolB	b1209	-0.59377	0.369944		lolB	b1209	-0.106	0.990197
lolC	b1116	-0.254371	0.94124		lolC	b1116	-0.574716	0.563185		lolC	b1116	-0.340978	0.957842			lolC	b1116	-0.330691	0.779496		lolC	b1116	-0.687744	0.686681		lolC	b1116	-0.981489	0.292992			lolC	b1116	0.18124	0.956174		lolC	b1116	-0.324727	0.772643		lolC	b1116	0.147583	0.989937
lolD	b1117	-0.0965631	0.973724		lolD	b1117	-0.15337	0.935398		lolD	b1117	-0.53037	0.903221			lolD	b1117	-0.571024	0.543416		lolD	b1117	-0.415299	0.891603		lolD	b1117	-0.876361	0.484761			lolD	b1117	-0.208383	0.94254		lolD	b1117	-0.447254	0.65627		lolD	b1117	-0.274315	0.989937
lolE	b1118	0.19965	0.946716		lolE	b1118	-0.358184	0.691833		lolE	b1118	0.0290014	0.996787			lolE	b1118	-0.355028	0.668312		lolE	b1118	-0.69091	0.503783		lolE	b1118	-0.0115192	0.991004			lolE	b1118	0.101231	0.973152		lolE	b1118	-0.701366	0.236828		lolE	b1118	-0.121028	0.989937
lomR	b1369	1.27937	NA		lomR	b1369	0.36248	NA		lomR	b1369	-1.39429	NA			lomR	b1369	-0.408314	NA		lomR	b1369	1.68454	NA		lomR	b1369	-0.41857	NA			lomR	b1369	1.10967	0.840585		lomR	b1369	0.696846	NA		lomR	b1369	-1.16247	NA
lon	b0439	-0.0762394	0.974294		lon	b0439	0.0842781	0.959338		lon	b0439	-0.216052	0.966987			lon	b0439	-0.457305	0.596212		lon	b0439	-0.115852	0.967263		lon	b0439	-0.0878286	0.92418			lon	b0439	-0.240199	0.91225		lon	b0439	0.836977	0.158555		lon	b0439	0.544767	0.9763
lpd	b0116	0.231014	0.952141		lpd	b0116	-1.14212	0.0916893		lpd	b0116	-0.143186	0.972996			lpd	b0116	-0.881862	0.298193		lpd	b0116	-0.183595	0.961914		lpd	b0116	0.408939	0.69051			lpd	b0116	-0.161074	0.969807		lpd	b0116	-1.07769	0.112071		lpd	b0116	-0.166637	0.989937
lplA	b4386	-0.567579	0.793993		lplA	b4386	-0.0502909	0.983436		lplA	b4386	0.253087	0.972462			lplA	b4386	-0.49768	0.653428		lplA	b4386	0.793996	0.663927		lplA	b4386	0.56639	0.715874			lplA	b4386	-0.541676	0.755155		lplA	b4386	-0.293567	0.81424		lplA	b4386	0.0304253	0.991522
lplT	b2835	-0.230895	0.956354		lplT	b2835	-0.132553	0.943826		lplT	b2835	-0.709013	0.685534			lplT	b2835	-0.0506162	0.976668		lplT	b2835	0.00366218	0.998054		lplT	b2835	-1.54379	0.0248359			lplT	b2835	-0.139798	0.973152		lplT	b2835	-0.0964296	0.940029		lplT	b2835	-0.0783565	0.990197
lpoA	b3147	-0.191021	0.934547		lpoA	b3147	0.0779578	0.953597		lpoA	b3147	-0.458451	0.75354			lpoA	b3147	-0.206091	0.813211		lpoA	b3147	-0.0794927	0.972127		lpoA	b3147	-0.502694	0.458992			lpoA	b3147	-0.0459686	0.984481		lpoA	b3147	0.120854	0.892017		lpoA	b3147	0.200421	0.986829
lpoB	b1105	-0.451847	0.832032		lpoB	b1105	0.0569355	0.97792		lpoB	b1105	-0.0146894	0.996787			lpoB	b1105	-0.0962303	0.944914		lpoB	b1105	0.434676	0.873323		lpoB	b1105	-0.320469	0.78188			lpoB	b1105	-0.368392	0.86689		lpoB	b1105	-0.259318	0.830588		lpoB	b1105	0.157141	0.989937
lpp	b1677	-0.0493301	0.98612		lpp	b1677	-1.16206	0.317734		lpp	b1677	0.26108	0.972462			lpp	b1677	0.134153	0.946976		lpp	b1677	-0.784076	0.797238		lpp	b1677	1.16667	0.328902			lpp	b1677	0.00825895	0.999278		lpp	b1677	0.624952	0.670174		lpp	b1677	0.766365	0.984035
lptA	b3200	0.0787778	0.974294		lptA	b3200	0.297315	0.789561		lptA	b3200	0.22504	0.970424			lptA	b3200	0.0658694	0.956246		lptA	b3200	0.157867	0.964234		lptA	b3200	0.549698	0.531694			lptA	b3200	-0.0330476	0.9923		lptA	b3200	0.298476	0.749387		lptA	b3200	0.294625	0.986829
lptB	b3201	-0.160747	0.956573		lptB	b3201	0.284656	0.757223		lptB	b3201	-0.275508	0.937998			lptB	b3201	-0.200832	0.838099		lptB	b3201	0.395751	0.821193		lptB	b3201	-0.169283	0.854294			lptB	b3201	-0.154446	0.945534		lptB	b3201	0.501224	0.43285		lptB	b3201	0.314311	0.986829
lptC	b3199	0.311687	0.892155		lptC	b3199	0.0654607	0.965898		lptC	b3199	0.232022	0.957842			lptC	b3199	0.604891	0.415629		lptC	b3199	-0.109719	0.965947		lptC	b3199	0.213246	0.818158			lptC	b3199	0.218576	0.91225		lptC	b3199	0.179837	0.841808		lptC	b3199	0.166627	0.989851
lptD	b0054	0.233512	0.804472		lptD	b0054	-0.338522	0.378056		lptD	b0054	-0.0266677	0.99084			lptD	b0054	0.169658	0.761647		lptD	b0054	0.140243	0.926164		lptD	b0054	0.307383	0.484761			lptD	b0054	0.470883	0.24538		lptD	b0054	-0.0147055	0.976812		lptD	b0054	-0.194369	0.986829
lptE	b0641	0.125606	0.967979		lptE	b0641	-0.248555	0.840146		lptE	b0641	-0.251464	0.958124			lptE	b0641	0.228454	0.838099		lptE	b0641	-0.0844091	0.977318		lptE	b0641	0.00311938	0.997198			lptE	b0641	0.095801	0.973152		lptE	b0641	0.442818	0.598625		lptE	b0641	0.25915	0.986829
lptF	b4261	-0.664008	0.476186		lptF	b4261	0.0373186	0.982621		lptF	b4261	-0.342374	0.897309			lptF	b4261	-0.469455	0.523045		lptF	b4261	-0.299013	0.888854		lptF	b4261	-0.639733	0.340695			lptF	b4261	-0.452548	0.704279		lptF	b4261	0.441507	0.496686		lptF	b4261	0.168086	0.989851
lptG	b4262	-0.382255	0.763329		lptG	b4262	-0.00114244	0.998208		lptG	b4262	-0.513168	0.685534			lptG	b4262	-0.235464	0.772432		lptG	b4262	-0.0873731	0.971858		lptG	b4262	-0.651266	0.310255			lptG	b4262	-0.241096	0.867949		lptG	b4262	0.479298	0.381168		lptG	b4262	-0.0333936	0.990197
lpxA	b0181	-0.172059	0.956467		lpxA	b0181	-0.562518	0.408964		lpxA	b0181	-0.711386	0.462596			lpxA	b0181	0.187771	0.85432		lpxA	b0181	0.193173	0.947028		lpxA	b0181	0.082881	0.925661			lpxA	b0181	0.269786	0.890851		lpxA	b0181	0.94699	0.0678652		lpxA	b0181	0.432215	0.984035
lpxB	b0182	-0.541407	0.741614		lpxB	b0182	-0.00414047	0.997228		lpxB	b0182	-0.220155	0.970424			lpxB	b0182	-0.489599	0.601541		lpxB	b0182	0.00757692	0.99737		lpxB	b0182	-0.190791	0.856209			lpxB	b0182	-0.391994	0.830194		lpxB	b0182	0.10157	0.935897		lpxB	b0182	0.2995	0.986829
lpxC	b0096	0.254661	0.952141		lpxC	b0096	-0.533662	0.637253		lpxC	b0096	-0.254733	0.970424			lpxC	b0096	0.0476171	0.979382		lpxC	b0096	-0.0910146	0.978051		lpxC	b0096	-0.163035	0.894184			lpxC	b0096	0.343096	0.897492		lpxC	b0096	1.03929	0.17662		lpxC	b0096	0.234432	0.989491
lpxD	b0179	0.012042	0.997717		lpxD	b0179	-0.176303	0.876262		lpxD	b0179	-0.259195	0.941427			lpxD	b0179	0.0681835	0.949696		lpxD	b0179	0.0853737	0.973423		lpxD	b0179	0.371019	0.621152			lpxD	b0179	0.00857423	0.996275		lpxD	b0179	0.684445	0.224786		lpxD	b0179	0.157051	0.989937
lpxH	b0524	0.18123	0.957396		lpxH	b0524	-0.518484	0.625974		lpxH	b0524	-0.13666	0.981107			lpxH	b0524	-0.233909	0.851486		lpxH	b0524	-0.0650093	0.978051		lpxH	b0524	-0.00283002	0.99832			lpxH	b0524	0.0447369	0.990299		lpxH	b0524	0.205274	0.874326		lpxH	b0524	-0.208162	0.989937
lpxK	b0915	-0.349511	0.818408		lpxK	b0915	-0.0541138	0.965898		lpxK	b0915	-0.278483	0.916726			lpxK	b0915	-0.64656	0.246247		lpxK	b0915	-0.793701	0.161851		lpxK	b0915	-0.423786	0.55919			lpxK	b0915	-0.402171	0.712383		lpxK	b0915	-0.505525	0.333776		lpxK	b0915	0.0814721	0.990197
lpxL	b1054	-0.333801	0.907713		lpxL	b1054	0.150256	0.928739		lpxL	b1054	-0.087584	0.988459			lpxL	b1054	-0.90628	0.253781		lpxL	b1054	-0.416101	0.867153		lpxL	b1054	-0.704026	0.484761			lpxL	b1054	-0.61312	0.679087		lpxL	b1054	-0.213717	0.852392		lpxL	b1054	-0.337146	0.986829
lpxM	b1855	-0.432147	0.589443		lpxM	b1855	-0.217748	0.735793		lpxM	b1855	-0.249185	0.913318			lpxM	b1855	-0.692762	0.0669121		lpxM	b1855	-0.17246	0.921412		lpxM	b1855	-0.621655	0.250681			lpxM	b1855	-0.474754	0.399314		lpxM	b1855	0.100375	0.885637		lpxM	b1855	-0.45812	0.9763
lpxP	b2378	0.528093	0.868087		lpxP	b2378	-0.0274303	0.990062		lpxP	b2378	-0.454718	0.903221			lpxP	b2378	0.263193	0.865845		lpxP	b2378	-0.0846708	0.978051		lpxP	b2378	-0.630825	0.570927			lpxP	b2378	1.24537	0.234533		lpxP	b2378	0.902201	0.265205		lpxP	b2378	-0.709974	0.983105
lpxT	b2174	-0.1416	0.975493		lpxT	b2174	-0.332762	0.920085		lpxT	b2174	-1.64702	0.897309			lpxT	b2174	-0.58139	0.806602		lpxT	b2174	-0.312152	0.96528		lpxT	b2174	-2.94301	0.369436			lpxT	b2174	-0.505188	0.914188		lpxT	b2174	-0.302547	0.906471		lpxT	b2174	-2.27399	0.983105
lrhA	b2289	0.467696	0.89922		lrhA	b2289	1.43279	0.0945036		lrhA	b2289	0.62865	0.851284			lrhA	b2289	0.661155	0.611372		lrhA	b2289	-0.848522	0.64404		lrhA	b2289	-0.584057	0.642981			lrhA	b2289	-0.272195	0.943329		lrhA	b2289	1.04233	0.247734		lrhA	b2289	0.329586	0.986829
lrp	b0889	0.272548	0.95653		lrp	b0889	-0.753975	0.527792		lrp	b0889	-0.144155	0.981107			lrp	b0889	0.626844	0.639743		lrp	b0889	-0.439978	0.91019		lrp	b0889	1.09214	0.296817			lrp	b0889	0.748301	0.722141		lrp	b0889	-0.204673	0.901314		lrp	b0889	0.0742314	0.990197
lspA	b0027	0.240778	0.957396		lspA	b0027	-0.615552	0.606237		lspA	b0027	-0.325033	0.958697			lspA	b0027	0.569169	0.651821		lspA	b0027	-0.908062	0.575435		lspA	b0027	-0.456844	0.724297			lspA	b0027	0.415068	0.879529		lspA	b0027	0.121123	0.938999		lspA	b0027	0.196463	0.989937
lsrA	b1513	-1.43018	0.657858		lsrA	b1513	-0.0244028	0.994331		lsrA	b1513	-1.28413	0.749828			lsrA	b1513	-0.376823	0.895774		lsrA	b1513	-0.191499	0.977679		lsrA	b1513	-2.94632	0.0289942			lsrA	b1513	-0.906223	0.830194		lsrA	b1513	1.08177	0.575976		lsrA	b1513	-0.732208	0.986829
[truncated: 2,917 more rows]

## Sheet: Filtered - Com vs H. alvei
Differential expression analysis of E. coli during growth in the community versus growth with H. alvei : List of genes differentially expressed at day1, day2 or day3 associated with an adjusted p-value lower than 1%
[truncated: 78 more rows]

[truncated: 2 more sheets: Filtered - Com vs G. candidum, Filtered - Com vs P. camemberti]
