# Supplementary material for: Changes in the genetic requirements for microbial interactions with increasing community complexity
Source: eLife journal article supplement (doi:10.7554/elife.37072), 2018-09-13
Supplement: supp [file elife_poa_e37072_Figure_1_source_data_1.xlsx]

## Sheet: Raw data Alone
Raw data - Gene fitness values an t-score value for the 3298 genes with estimated fitness from RB-TnSeq - Growth alone Day 1, Day 2 and Day 3
Day1					Day2					Day3
locusId	sysName	Fitness value	t-score		locusId	sysName	Fitness value	t-score		locusId	sysName	Fitness value	t-score
14146	b0001	0.0801038	0.208971		14146	b0001	-0.287325	0.208971		14146	b0001	-0.726237	-1.20555
14147	b0002	-0.0988911	-0.686283		14147	b0002	-0.0835042	-0.686283		14147	b0002	-0.717416	-4.82435
14148	b0003	-0.227266	-1.29777		14148	b0003	-0.292749	-1.29777		14148	b0003	-0.541076	-2.59508
14149	b0004	-0.511263	-2.56689		14149	b0004	-0.749114	-2.56689		14149	b0004	-1.17542	-4.91111
14150	b0005	0.109964	0.299745		14150	b0005	-0.0293317	0.299745		14150	b0005	0.0535846	0.166511
14151	b0006	-0.255744	-1.55265		14151	b0006	-0.276537	-1.55265		14151	b0006	-0.39395	-2.11421
14152	b0007	-0.0434148	-0.243839		14152	b0007	-0.13509	-0.243839		14152	b0007	-0.0687244	-0.427773
14153	b0008	0.433684	2.1786		14153	b0008	-0.133629	2.1786		14153	b0008	0.0707662	0.390981
14154	b0009	0.0585549	0.270579		14154	b0009	-0.0626934	0.270579		14154	b0009	-0.068057	-0.287401
14155	b0010	-0.1136	-0.496476		14155	b0010	0.408203	-0.496476		14155	b0010	0.162425	0.54231
14156	b0011	-0.116073	-0.726625		14156	b0011	-0.195661	-0.726625		14156	b0011	0.0311073	0.165433
14158	b0013	-0.224171	-0.895202		14158	b0013	-0.375654	-0.895202		14158	b0013	-0.136983	-0.508705
14160	b0015	-0.34492	-1.62287		14160	b0015	-0.263172	-1.62287		14160	b0015	-0.306411	-1.7516
14164	b0019	-4.09118	-10.3913		14164	b0019	-0.472402	-10.3913		14164	b0019	-5.23033	-5.08751
14165	b0020	0.0480187	0.309185		14165	b0020	-0.116847	0.309185		14165	b0020	-0.0333158	-0.221161
14173	b0028	0.414641	0.955341		14173	b0028	0.301802	0.955341		14173	b0028	0.405012	1.21154
14175	b0030	0.000341953	0.00202284		14175	b0030	-0.305268	0.00202284		14175	b0030	-0.254761	-1.26006
14177	b0032	-0.115037	-0.554114		14177	b0032	-0.142178	-0.554114		14177	b0032	-0.417123	-1.14228
14178	b0033	-0.0739643	-0.53939		14178	b0033	-0.33045	-0.53939		14178	b0033	-0.44835	-3.26046
14180	b0034	-0.365168	-2.35767		14180	b0034	-0.289465	-2.35767		14180	b0034	-0.20605	-1.25068
14181	b0035	-0.0239766	-0.11526		14181	b0035	-0.19734	-0.11526		14181	b0035	-0.123483	-0.481113
14182	b0036	0.271698	1.55709		14182	b0036	0.127863	1.55709		14182	b0036	0.112886	0.579971
14183	b0037	-0.28319	-2.11068		14183	b0037	-0.253061	-2.11068		14183	b0037	-0.243422	-1.72725
14184	b0038	-0.175808	-1.15021		14184	b0038	-0.202355	-1.15021		14184	b0038	-0.237551	-1.50486
14185	b0039	-0.105496	-0.54509		14185	b0039	0.0116583	-0.54509		14185	b0039	-0.119799	-0.678397
14186	b0040	-0.166953	-1.16688		14186	b0040	-0.181198	-1.16688		14186	b0040	-0.203756	-1.35097
14187	b0041	-0.308333	-1.09891		14187	b0041	-0.255189	-1.09891		14187	b0041	-0.0488681	-0.200169
14188	b0042	-0.103121	-0.564608		14188	b0042	-0.165226	-0.564608		14188	b0042	0.078049	0.362959
14189	b0043	0.0258675	0.12889		14189	b0043	-0.49312	0.12889		14189	b0043	-0.140818	-0.67836
14190	b0044	0.252946	0.857447		14190	b0044	0.00634824	0.857447		14190	b0044	-0.145258	-0.519783
14191	b0045	-0.0327359	-0.186153		14191	b0045	0.1056	-0.186153		14191	b0045	0.0412714	0.248054
14192	b0046	-0.454309	-3.02602		14192	b0046	-0.444031	-3.02602		14192	b0046	-0.382056	-1.85926
14193	b0047	-0.0538038	-0.364021		14193	b0047	-0.111707	-0.364021		14193	b0047	-0.276741	-1.90279
14196	b0050	-0.0920371	-0.443356		14196	b0050	-0.208595	-0.443356		14196	b0050	-0.0747279	-0.325213
14198	b0052	0.138522	0.781814		14198	b0052	0.0148095	0.781814		14198	b0052	-0.260424	-1.55032
14201	b0055	-0.528313	-2.64348		14201	b0055	-0.220484	-2.64348		14201	b0055	-0.495646	-2.64006
14204	b0058	-0.188351	-0.855636		14204	b0058	-0.280931	-0.855636		14204	b0058	-0.170407	-0.77586
14205	b0059	0.62978	4.93027		14205	b0059	0.804646	4.93027		14205	b0059	0.601356	4.53095
14206	b0060	-0.0452856	-0.313983		14206	b0060	-0.287165	-0.313983		14206	b0060	-0.152631	-1.01389
14207	b0061	-0.458046	-2.13303		14207	b0061	-0.369291	-2.13303		14207	b0061	-0.634703	-3.20855
14210	b0064	-0.251394	-1.3696		14210	b0064	0.135389	-1.3696		14210	b0064	0.0549796	0.241446
14211	b0065	0.046675	0.256878		14211	b0065	0.277162	0.256878		14211	b0065	-0.0814658	-0.434416
14212	b0066	0.0601096	0.30365		14212	b0066	-0.178491	0.30365		14212	b0066	0.0849815	0.470979
14213	b0067	-0.0881762	-0.663181		14213	b0067	0.0198472	-0.663181		14213	b0067	-0.0199979	-0.162667
14214	b0068	-0.0843482	-0.51691		14214	b0068	-0.133946	-0.51691		14214	b0068	0.000458275	0.00286806
14215	b0069	-0.0317819	-0.195058		14215	b0069	-0.137107	-0.195058		14215	b0069	0.169145	1.07006
14217	b0071	-0.234836	-1.08621		14217	b0071	-0.2036	-1.08621		14217	b0071	0.0659852	0.336271
14218	b0072	-0.230892	-1.38684		14218	b0072	-0.273791	-1.38684		14218	b0072	-0.220681	-1.25921
14219	b0073	0.0014506	0.00784681		14219	b0073	-0.0136837	0.00784681		14219	b0073	0.0437935	0.229317
14220	b0074	-0.182215	-1.02748		14220	b0074	-0.0448289	-1.02748		14220	b0074	-0.30384	-1.76341
14221	b0075	0.016326	0.105047		14221	b0075	0.153476	0.105047		14221	b0075	-0.335313	-1.79254
14222	b0076	-0.0718957	-0.539043		14222	b0076	-0.117467	-0.539043		14222	b0076	-0.331007	-2.35736
14224	b0078	-0.340043	-2.14088		14224	b0078	-0.316264	-2.14088		14224	b0078	-0.96503	-4.78445
14227	b0081	0.0393321	0.184964		14227	b0081	-0.26205	0.184964		14227	b0081	-0.0135169	-0.0463567
14238	b0092	-0.936389	-3.62017		14238	b0092	-0.068714	-3.62017		14238	b0092	-0.393946	-1.96081
14243	b0097	-0.350832	-0.898209		14243	b0097	-0.712774	-0.898209		14243	b0097	0.252194	0.720544
14245	b0099	-0.259907	-1.10662		14245	b0099	0.141036	-1.10662		14245	b0099	-0.26957	-0.665785
14247	b0101	-0.110852	-0.228388		14247	b0101	0.567132	-0.228388		14247	b0101	0.81548	1.61632
14248	b0102	-0.142443	-0.556741		14248	b0102	-0.221991	-0.556741		14248	b0102	-0.275807	-1.05245
14250	b0104	-0.136313	-0.856126		14250	b0104	-0.304193	-0.856126		14250	b0104	-0.18206	-1.04338
14252	b0106	-0.271014	-1.5108		14252	b0106	0.152783	-1.5108		14252	b0106	0.0390677	0.253307
14253	b0107	-0.0471002	-0.237672		14253	b0107	0.0522419	-0.237672		14253	b0107	0.0411473	0.193821
14254	b0108	-0.0219893	-0.0921314		14254	b0108	-0.171414	-0.0921314		14254	b0108	0.0886609	0.279732
14255	b0109	-0.312673	-1.43424		14255	b0109	-3.87845e-05	-1.43424		14255	b0109	0.0915307	0.393453
14256	b0110	-0.204745	-0.794841		14256	b0110	0.0261947	-0.794841		14256	b0110	0.197663	0.831167
14257	b0111	-0.374993	-2.22334		14257	b0111	-0.417621	-2.22334		14257	b0111	-0.224253	-1.36593
14258	b0112	-0.0929589	-0.639552		14258	b0112	-0.0775787	-0.639552		14258	b0112	0.123239	0.782297
14259	b0113	-0.82309	-1.70239		14259	b0113	-1.1089	-1.70239		14259	b0113	-0.631629	-1.22811
14263	b0117	0.002492	0.0194216		14263	b0117	-0.124874	0.0194216		14263	b0117	0.0375031	0.269266
14265	b0119	-0.258463	-1.30101		14265	b0119	-0.431917	-1.30101		14265	b0119	-0.272629	-1.45445
14266	b0120	-0.221874	-1.29599		14266	b0120	-0.197717	-1.29599		14266	b0120	-0.302879	-1.47431
14267	b0121	-0.445878	-2.16636		14267	b0121	-0.119199	-2.16636		14267	b0121	-0.083314	-0.444454
14268	b0122	0.212265	0.730013		14268	b0122	-0.103002	0.730013		14268	b0122	-0.129236	-0.410497
14269	b0123	-0.282906	-1.62342		14269	b0123	-0.406723	-1.62342		14269	b0123	-0.373386	-1.89762
14270	b0124	-0.0888525	-0.653825		14270	b0124	-0.150732	-0.653825		14270	b0124	-0.0242521	-0.179539
14271	b0125	-0.243538	-0.724724		14271	b0125	-0.573624	-0.724724		14271	b0125	-0.73054	-0.824254
14273	b0127	-0.145951	-0.443606		14273	b0127	-0.132359	-0.443606		14273	b0127	-0.0532194	-0.205286
14274	b0128	-0.101069	-0.515051		14274	b0128	-0.309004	-0.515051		14274	b0128	-0.102895	-0.542382
14275	b0129	0.307786	1.51282		14275	b0129	0.446532	1.51282		14275	b0129	0.42259	1.8516
14276	b0130	-0.102618	-0.595943		14276	b0130	-0.0558369	-0.595943		14276	b0130	-0.10562	-0.61134
14277	b0131	-0.298342	-0.627522		14277	b0131	-0.20956	-0.627522		14277	b0131	-0.214034	-0.565542
14278	b0132	-0.0972617	-0.635066		14278	b0132	0.0611982	-0.635066		14278	b0132	0.0687316	0.414916
14279	b0133	0.16271	0.839268		14279	b0133	0.00156742	0.839268		14279	b0133	0.281887	1.5082
14280	b0134	-0.173697	-0.887397		14280	b0134	0.00882526	-0.887397		14280	b0134	-0.219092	-0.870205
14281	b0135	-0.0525705	-0.360694		14281	b0135	-0.075133	-0.360694		14281	b0135	-0.11121	-0.702123
14283	b0137	-0.217229	-1.16032		14283	b0137	-0.139981	-1.16032		14283	b0137	0.0156962	0.0785954
14284	b0138	-0.429083	-2.24271		14284	b0138	-0.460486	-2.24271		14284	b0138	-0.430056	-2.05687
14285	b0139	-0.12648	-1.09328		14285	b0139	-0.0410053	-1.09328		14285	b0139	-0.0369743	-0.322263
14286	b0140	-0.129817	-0.907702		14286	b0140	0.0987006	-0.907702		14286	b0140	-0.0948923	-0.703609
14287	b0141	-0.789492	-3.0102		14287	b0141	-0.734456	-3.0102		14287	b0141	-0.842731	-3.19048
14289	b0143	-0.479044	-1.3983		14289	b0143	-0.820625	-1.3983		14289	b0143	-1.02068	-1.74633
14290	b0144	-0.0814021	-0.383766		14290	b0144	-0.0184145	-0.383766		14290	b0144	-0.196268	-1.10635
14292	b0146	-0.0959922	-0.534368		14292	b0146	0.0679508	-0.534368		14292	b0146	0.0973499	0.601847
14293	b0147	0.00327986	0.0149204		14293	b0147	0.163285	0.0149204		14293	b0147	0.107686	0.45796
14294	b0148	-0.143816	-1.17662		14294	b0148	-0.0647965	-1.17662		14294	b0148	-0.15661	-1.19667
14295	b0149	-1.94928	-8.48945		14295	b0149	-0.909236	-8.48945		14295	b0149	-1.01506	-4.97965
14296	b0150	-0.00790229	-0.0602556		14296	b0150	0.0598882	-0.0602556		14296	b0150	-0.234192	-1.67835
14297	b0151	-0.404629	-1.88015		14297	b0151	-0.297958	-1.88015		14297	b0151	-0.344043	-1.5033
14298	b0152	-0.414759	-2.32813		14298	b0152	-0.0194291	-2.32813		14298	b0152	-0.278011	-1.17076
14299	b0153	-0.308762	-2.2835		14299	b0153	0.0467841	-2.2835		14299	b0153	-0.331449	-2.3532
14301	b0155	-0.318608	-2.11336		14301	b0155	-0.258003	-2.11336		14301	b0155	-0.0676671	-0.45144
14303	b0157	-0.10307	-0.416374		14303	b0157	-0.176777	-0.416374		14303	b0157	-0.270423	-1.0929
14304	b0158	-0.129609	-0.717513		14304	b0158	-0.137247	-0.717513		14304	b0158	-0.205868	-1.10739
14306	b0160	-0.242614	-2.12391		14306	b0160	-0.231424	-2.12391		14306	b0160	-0.0995974	-0.867761
14307	b0161	-0.333819	-1.43696		14307	b0161	-0.534565	-1.43696		14307	b0161	-0.144777	-0.483154
14308	b0162	0.00346759	0.0164167		14308	b0162	0.261492	0.0164167		14308	b0162	0.0551327	0.245496
14309	b0163	-0.053903	-0.193241		14309	b0163	-0.475929	-0.193241		14309	b0163	-0.167872	-0.674512
14310	b0164	-0.243592	-0.93643		14310	b0164	-0.395778	-0.93643		14310	b0164	-0.268532	-1.1505
14313	b0167	-0.321744	-0.707755		14313	b0167	-0.0327984	-0.707755		14313	b0167	-0.288111	-0.682245
14324	b0178	0.398457	1.51809		14324	b0178	0.641269	1.51809		14324	b0178	0.252931	0.666573
14329	b0183	0.342526	0.9913		14329	b0183	0.434188	0.9913		14329	b0183	0.425308	1.55686
14332	b0186	-0.16733	-1.09011		14332	b0186	0.0367797	-1.09011		14332	b0186	-0.165638	-1.0493
14333	b0187	-0.0394168	-0.143818		14333	b0187	0.161616	-0.143818		14333	b0187	-0.0282194	-0.0716762
14335	b0189	-0.455612	-1.20935		14335	b0189	-0.123377	-1.20935		14335	b0189	-0.0500228	-0.114855
14336	b0190	-0.00146792	-0.00729313		14336	b0190	-0.0516824	-0.00729313		14336	b0190	0.335464	1.84546
14337	b0191	0.080963	0.338662		14337	b0191	0.130475	0.338662		14337	b0191	0.60653	2.16222
14338	b0192	-0.284828	-1.44358		14338	b0192	-0.104703	-1.44358		14338	b0192	-0.180986	-0.761974
14339	b0193	-0.0451108	-0.23465		14339	b0193	-0.111038	-0.23465		14339	b0193	0.0854919	0.527074
14341	b0195	0.0626653	0.280719		14341	b0195	0.337293	0.280719		14341	b0195	0.0573789	0.271096
14342	b0196	0.320496	1.47319		14342	b0196	0.168276	1.47319		14342	b0196	0.189501	0.827244
14343	b0197	-0.571683	-3.13709		14343	b0197	-0.229783	-3.13709		14343	b0197	-0.731351	-3.60279
14344	b0198	-0.0198072	-0.116093		14344	b0198	0.0400022	-0.116093		14344	b0198	0.180435	1.14044
14345	b0199	0.150394	1.06699		14345	b0199	0.259536	1.06699		14345	b0199	0.355941	2.71041
14347	b0207	-0.0777785	-0.363007		14347	b0207	-0.0804782	-0.363007		14347	b0207	-0.173245	-0.89646
14348	b0208	0.117542	0.566755		14348	b0208	0.118677	0.566755		14348	b0208	-0.243218	-1.08535
14349	b0209	-0.111906	-0.47059		14349	b0209	-0.257558	-0.47059		14349	b0209	0.102973	0.50021
14350	b0210	-0.0105317	-0.035581		14350	b0210	0.0338226	-0.035581		14350	b0210	-0.0135169	-0.0462119
14351	b0211	-0.0173007	-0.0828767		14351	b0211	-0.0723224	-0.0828767		14351	b0211	0.20665	1.31737
14352	b0212	-0.603465	-1.2786		14352	b0212	-1.67576	-1.2786		14352	b0212	-1.10691	-3.09895
14353	b0213	-0.187672	-0.832502		14353	b0213	0.112211	-0.832502		14353	b0213	0.0498856	0.201544
14356	b0217	-0.408513	-1.19424		14356	b0217	-0.20079	-1.19424		14356	b0217	-0.442356	-1.30946
14358	b0219	-0.0197452	-0.0582183		14358	b0219	-0.0583352	-0.0582183		14358	b0219	-0.412015	-1.04519
14359	b0220	0.0710006	0.310454		14359	b0220	-0.166852	0.310454		14359	b0220	0.300238	1.05867
14360	b0221	0.0528626	0.358438		14360	b0221	0.0933364	0.358438		14360	b0221	0.157046	0.988585
14362	b0223	0.0592912	0.263269		14362	b0223	0.238258	0.263269		14362	b0223	-0.126389	-0.626348
14363	b0224	0.00232778	0.0122762		14363	b0224	0.135361	0.0122762		14363	b0224	-0.0533227	-0.305976
14364	b0225	-0.644633	-1.86071		14364	b0225	-0.570732	-1.86071		14364	b0225	-0.629037	-2.23928
14365	b0226	-0.146467	-0.474963		14365	b0226	-0.738741	-0.474963		14365	b0226	-1.20144	-3.35945
14366	b0227	0.128595	0.602754		14366	b0227	0.103642	0.602754		14366	b0227	0.036452	0.147989
14367	b0228	-0.164407	-0.526306		14367	b0228	0.281028	-0.526306		14367	b0228	0.260883	0.773857
14368	b0229	-0.0521465	-0.286777		14368	b0229	-0.253972	-0.286777		14368	b0229	-0.279755	-1.36009
14369	b0230	0.28819	1.29725		14369	b0230	-0.145069	1.29725		14369	b0230	-0.0508889	-0.262185
14370	b0231	0.226564	1.2685		14370	b0231	-0.0924711	1.2685		14370	b0231	0.0275432	0.130871
14372	b0233	-0.362845	-1.24687		14372	b0233	-0.199912	-1.24687		14372	b0233	-0.130353	-0.452542
14374	b0235	0.159904	0.939809		14374	b0235	-0.203849	0.939809		14374	b0235	0.0777276	0.488868
14375	b0236	0.400487	1.08941		14375	b0236	-0.475259	1.08941		14375	b0236	0.174826	0.48277
14376	b0237	-0.234092	-1.27002		14376	b0237	-0.211962	-1.27002		14376	b0237	-0.392685	-1.73113
14377	b0238	0.561949	1.22614		14377	b0238	0.176999	1.22614		14377	b0238	-0.00611527	-0.0230686
14378	b0239	0.168301	0.822164		14378	b0239	-0.111047	0.822164		14378	b0239	-0.118654	-0.590314
14379	b0240	0.0964248	0.509795		14379	b0240	0.0390158	0.509795		14379	b0240	0.0399982	0.211902
14380	b0241	0.122056	0.900556		14380	b0241	0.0713183	0.900556		14380	b0241	0.104042	0.754487
14381	b0242	0.0697723	0.306622		14381	b0242	0.042528	0.306622		14381	b0242	-0.365081	-1.24636
14382	b0243	-0.291995	-1.41733		14382	b0243	-0.462044	-1.41733		14382	b0243	-0.723769	-3.52804
14383	b0245	0.143977	0.635772		14383	b0245	0.066187	0.635772		14383	b0245	0.0561655	0.274588
14384	b0246	0.174142	0.860999		14384	b0246	-0.00223967	0.860999		14384	b0246	-0.0126992	-0.0652319
14385	b0247	-0.709486	-1.05689		14385	b0247	-0.808248	-1.05689		14385	b0247	-0.82766	-1.21835
14386	b0248	0.210974	0.497178		14386	b0248	-0.0335926	0.497178		14386	b0248	-0.0245706	-0.0654306
14387	b0249	-0.166155	-0.369478		14387	b0249	-0.686486	-0.369478		14387	b0249	-0.333496	-1.01663
14388	b0250	-0.116212	-0.490761		14388	b0250	-0.265374	-0.490761		14388	b0250	0.068516	0.247191
14389	b0251	0.253694	0.551984		14389	b0251	0.745121	0.551984		14389	b0251	0.593845	1.74784
14390	b0252	0.336912	1.41514		14390	b0252	0.346317	1.41514		14390	b0252	0.20101	0.859237
14391	b0253	0.0182939	0.117711		14391	b0253	0.198981	0.117711		14391	b0253	0.0280951	0.150278
14392	b0254	0.195429	0.932002		14392	b0254	-0.155124	0.932002		14392	b0254	-0.144673	-0.683656
14396	b0258	0.221605	1.21484		14396	b0258	0.0906053	1.21484		14396	b0258	-0.0677025	-0.270737
14398	b0260	0.119933	0.588961		14398	b0260	0.0321111	0.588961		14398	b0260	0.000392148	0.00185741
14399	b0261	-0.000899278	-0.00429379		14399	b0261	-0.155574	-0.00429379		14399	b0261	-0.0143345	-0.0626709
14400	b0262	0.162013	0.936422		14400	b0262	0.168968	0.936422		14400	b0262	0.0926377	0.489297
14401	b0263	0.147412	0.441464		14401	b0263	-0.0331133	0.441464		14401	b0263	-0.60022	-1.50309
14404	b0266	0.111476	0.662886		14404	b0266	0.190337	0.662886		14404	b0266	0.396159	2.35398
14405	b0267	-0.0168339	-0.100125		14405	b0267	0.146648	-0.100125		14405	b0267	0.0959817	0.55442
14406	b0268	0.280701	1.29911		14406	b0268	0.368852	1.29911		14406	b0268	0.270499	1.14156
14407	b0269	0.266921	1.51217		14407	b0269	0.261271	1.51217		14407	b0269	0.0211713	0.118963
14408	b0270	0.163762	0.829028		14408	b0270	-0.133069	0.829028		14408	b0270	0.383387	1.93029
14409	b0271	-0.0825716	-0.49879		14409	b0271	-0.211869	-0.49879		14409	b0271	-0.118127	-0.721283
14410	b0272	-0.0372501	-0.163636		14410	b0272	-0.0235667	-0.163636		14410	b0272	0.285303	1.4203
14411	b0273	0.0442172	0.226352		14411	b0273	0.205514	0.226352		14411	b0273	-0.0638062	-0.312131
14414	b0276	0.0230765	0.151129		14414	b0276	0.11649	0.151129		14414	b0276	0.161629	1.02236
14415	b0277	0.0213415	0.166919		14415	b0277	0.0371904	0.166919		14415	b0277	0.139222	1.07956
14416	b0278	-0.0639278	-0.364519		14416	b0278	-0.219171	-0.364519		14416	b0278	-0.419718	-1.89692
14418	b0280	-0.0236396	-0.097716		14418	b0280	-0.0189993	-0.097716		14418	b0280	-0.0423724	-0.15219
14419	b0281	0.312277	1.69678		14419	b0281	0.206185	1.69678		14419	b0281	0.294608	1.64305
14421	b0283	0.004074	0.0225479		14421	b0283	0.0777335	0.0225479		14421	b0283	-0.141967	-0.821792
14422	b0284	-0.126654	-0.71086		14422	b0284	0.0811322	-0.71086		14422	b0284	0.178086	0.942045
14423	b0285	0.0261217	0.147353		14423	b0285	0.101784	0.147353		14423	b0285	0.40302	2.19188
14424	b0286	0.0785558	0.31281		14424	b0286	0.0773852	0.31281		14424	b0286	-0.0340364	-0.129656
14425	b0287	-0.0731014	-0.43708		14425	b0287	-0.00501747	-0.43708		14425	b0287	-0.106335	-0.663488
14426	b0288	0.381911	2.84714		14426	b0288	0.332587	2.84714		14426	b0288	0.323384	2.31104
14427	b0289	0.063687	0.322368		14427	b0289	0.23438	0.322368		14427	b0289	0.147697	0.544652
14428	b0290	0.29525	1.84926		14428	b0290	0.38692	1.84926		14428	b0290	0.203239	1.21084
14429	b0291	0.298092	2.05203		14429	b0291	0.145937	2.05203		14429	b0291	0.218885	1.56774
14430	b0292	0.440226	2.11837		14430	b0292	0.183051	2.11837		14430	b0292	0.336264	1.81526
14431	b0293	0.300662	1.72215		14431	b0293	0.474567	1.72215		14431	b0293	0.286195	1.51534
14432	b0294	-0.896664	-2.41173		14432	b0294	-0.881516	-2.41173		14432	b0294	-0.544807	-1.31323
14433	b0295	0.413745	1.61857		14433	b0295	0.269906	1.61857		14433	b0295	0.258945	1.13994
14434	b0296	0.6588	2.12817		14434	b0296	-0.135685	2.12817		14434	b0296	0.413151	1.24629
14435	b0297	0.579757	1.58988		14435	b0297	0.685379	1.58988		14435	b0297	0.560441	2.17905
14438	b0300	-0.584894	-1.51261		14438	b0300	-0.218405	-1.51261		14438	b0300	-0.333976	-0.900517
14439	b0301	-0.134457	-0.546149		14439	b0301	-0.118492	-0.546149		14439	b0301	-0.19488	-0.662835
14442	b0304	0.195593	1.54223		14442	b0304	0.129226	1.54223		14442	b0304	0.19068	1.55698
14443	b0305	-0.0864432	-0.481502		14443	b0305	-0.0557519	-0.481502		14443	b0305	-0.277711	-1.43155
14444	b0306	0.301361	1.79435		14444	b0306	0.178289	1.79435		14444	b0306	0.0745648	0.397969
14445	b0307	0.328657	1.51515		14445	b0307	0.19757	1.51515		14445	b0307	0.0724149	0.372592
14446	b0308	0.049067	0.244266		14446	b0308	0.00343892	0.244266		14446	b0308	-0.318552	-1.39732
14449	b0311	-1.16435	-6.90233		14449	b0311	-0.745773	-6.90233		14449	b0311	-0.933741	-6.10003
14450	b0312	-0.653585	-2.95699		14450	b0312	-0.456449	-2.95699		14450	b0312	-0.700324	-3.25326
14451	b0313	-0.066169	-0.212174		14451	b0313	-0.0284565	-0.212174		14451	b0313	0.034305	0.1429
14452	b0314	-0.861623	-4.83573		14452	b0314	-0.664659	-4.83573		14452	b0314	-0.762261	-4.59241
14453	b0315	-0.0209911	-0.171617		14453	b0315	0.0385137	-0.171617		14453	b0315	0.0022752	0.0183606
14454	b0316	0.171432	1.09115		14454	b0316	0.162261	1.09115		14454	b0316	0.214251	1.38912
14455	b0317	0.0944746	0.490412		14455	b0317	-0.262561	0.490412		14455	b0317	0.00927191	0.0336317
14456	b0318	0.164626	0.735875		14456	b0318	0.144338	0.735875		14456	b0318	0.286611	1.2451
14457	b0319	-0.151698	-0.801776		14457	b0319	-0.104561	-0.801776		14457	b0319	-0.283201	-1.50495
14458	b0320	0.000757108	0.00472629		14458	b0320	-0.174555	0.00472629		14458	b0320	0.0760052	0.498958
14459	b0321	0.285341	1.74258		14459	b0321	0.261422	1.74258		14459	b0321	0.186159	1.12907
14461	b0323	-0.0458928	-0.241765		14461	b0323	0.062087	-0.241765		14461	b0323	-0.0305233	-0.183996
14462	b0324	0.0645922	0.430987		14462	b0324	-0.0507625	0.430987		14462	b0324	0.0849385	0.549162
14463	b0325	0.101227	0.665097		14463	b0325	0.0981377	0.665097		14463	b0325	0.150509	0.911181
14465	b0327	0.392739	1.46588		14465	b0327	0.293257	1.46588		14465	b0327	0.330879	1.29534
14466	b0328	0.070132	0.434201		14466	b0328	0.00802378	0.434201		14466	b0328	0.0262764	0.162741
14467	b0329	-0.0331991	-0.181668		14467	b0329	-0.068348	-0.181668		14467	b0329	-0.0504494	-0.215679
14468	b0330	-0.0265064	-0.156478		14468	b0330	-0.199914	-0.156478		14468	b0330	0.0435273	0.249361
14469	b0331	0.224232	0.646275		14469	b0331	0.00223946	0.646275		14469	b0331	0.0908541	0.30784
14471	b0333	0.167686	0.760799		14471	b0333	0.229474	0.760799		14471	b0333	0.315107	1.51276
14472	b0334	-0.0736307	-0.352434		14472	b0334	-0.147293	-0.352434		14472	b0334	-0.426686	-1.44806
14473	b0335	0.0672644	0.344381		14473	b0335	0.113169	0.344381		14473	b0335	0.307042	1.86155
14474	b0336	0.10905	0.622709		14474	b0336	-0.210722	0.622709		14474	b0336	0.285669	1.49556
14475	b0337	0.368813	2.20908		14475	b0337	0.274166	2.20908		14475	b0337	0.299079	1.59888
14476	b0338	0.114627	0.360113		14476	b0338	-0.0603513	0.360113		14476	b0338	0.0885163	0.247629
14477	b0339	0.353098	1.01504		14477	b0339	0.618808	1.01504		14477	b0339	0.423068	1.73817
14479	b0341	0.40682	1.94933		14479	b0341	0.486361	1.94933		14479	b0341	0.454323	2.85757
14480	b0342	-0.106716	-0.647582		14480	b0342	-0.0725336	-0.647582		14480	b0342	0.00961133	0.0624669
14481	b0343	0.0381129	0.272506		14481	b0343	0.164989	0.272506		14481	b0343	0.161874	1.11519
14482	b0344	0.0355679	0.176912		14482	b0344	-0.182055	0.176912		14482	b0344	-0.0967343	-0.462603
14483	b0345	0.220042	1.15802		14483	b0345	0.0538162	1.15802		14483	b0345	0.00323194	0.0174342
14484	b0346	-0.514845	-1.30237		14484	b0346	0.266891	-1.30237		14484	b0346	0.194708	0.446884
14485	b0347	-0.114839	-0.649401		14485	b0347	-0.194932	-0.649401		14485	b0347	0.0383085	0.228307
14486	b0348	0.358149	1.93891		14486	b0348	0.0735543	1.93891		14486	b0348	0.131268	0.529349
14487	b0349	0.127771	0.623442		14487	b0349	0.226996	0.623442		14487	b0349	0.19446	1.05022
14488	b0350	0.246205	1.35655		14488	b0350	0.0550212	1.35655		14488	b0350	-0.123925	-0.602712
14489	b0351	0.130627	0.843176		14489	b0351	-0.0272168	0.843176		14489	b0351	0.111809	0.694595
14490	b0352	0.392613	1.37278		14490	b0352	0.114212	1.37278		14490	b0352	0.260499	1.26486
14491	b0353	-0.0835343	-0.381546		14491	b0353	-0.232107	-0.381546		14491	b0353	-0.0815712	-0.443809
14492	b0354	0.169479	0.989494		14492	b0354	0.0140932	0.989494		14492	b0354	-0.00388948	-0.0235147
14493	b0355	0.223627	0.985198		14493	b0355	0.177988	0.985198		14493	b0355	0.230118	1.06896
14494	b0356	0.0486734	0.249393		14494	b0356	-0.000202943	0.249393		14494	b0356	0.02995	0.138465
14496	b0358	0.0906791	0.560203		14496	b0358	-0.0394476	0.560203		14496	b0358	-0.244433	-1.50024
14501	b0363	0.224531	1.74015		14501	b0363	0.174717	1.74015		14501	b0363	0.169216	1.23656
14502	b0364	-0.313774	-0.963859		14502	b0364	-2.22081	-0.963859		14502	b0364	-2.0689	-4.93194
14503	b0365	-0.244891	-0.995236		14503	b0365	-0.0738562	-0.995236		14503	b0365	0.143959	0.476024
14504	b0366	0.0972298	0.446138		14504	b0366	0.0989411	0.446138		14504	b0366	0.0347312	0.181987
14505	b0367	-0.166614	-0.75744		14505	b0367	-0.395604	-0.75744		14505	b0367	-0.190951	-0.871072
14506	b0368	-0.03863	-0.158088		14506	b0368	-0.34776	-0.158088		14506	b0368	0.451826	1.38584
14513	b0375	-0.996192	-2.30331		14513	b0375	-0.112952	-2.30331		14513	b0375	-0.48414	-1.05386
14514	b0376	-0.0885879	-0.62891		14514	b0376	-0.136612	-0.62891		14514	b0376	-0.09761	-0.643682
14515	b0377	0.114352	0.80271		14515	b0377	0.0957663	0.80271		14515	b0377	0.111001	0.716935
14516	b0378	-0.0979174	-0.506907		14516	b0378	0.00865967	-0.506907		14516	b0378	0.164368	0.823144
14517	b0379	-0.394654	-1.63312		14517	b0379	-0.0726619	-1.63312		14517	b0379	-0.59345	-2.73149
14518	b0380	-0.353134	-1.43164		14518	b0380	-0.294462	-1.43164		14518	b0380	-0.368388	-1.31864
14519	b0381	0.170167	0.970208		14519	b0381	0.0555126	0.970208		14519	b0381	0.112253	0.523314
14520	b0382	0.0730913	0.377086		14520	b0382	0.147147	0.377086		14520	b0382	0.370398	2.38525
14521	b0383	0.023207	0.167178		14521	b0383	-0.0261669	0.167178		14521	b0383	0.0444442	0.312347
14522	b0384	0.339235	0.787138		14522	b0384	0.19871	0.787138		14522	b0384	0.0633983	0.158376
14523	b0385	-0.0931057	-0.380819		14523	b0385	0.0576875	-0.380819		14523	b0385	-0.0395311	-0.17421
14525	b0387	0.127334	0.462787		14525	b0387	0.143077	0.462787		14525	b0387	0.274722	0.893958
14526	b0388	-0.248378	-0.832261		14526	b0388	-0.404445	-0.832261		14526	b0388	-0.254249	-0.998333
14528	b0390	0.0874519	0.416879		14528	b0390	0.104178	0.416879		14528	b0390	-0.453809	-2.68906
14529	b0391	-0.0554057	-0.305303		14529	b0391	0.179617	-0.305303		14529	b0391	-0.0946524	-0.480267
14530	b0392	-0.0953109	-0.584547		14530	b0392	0.059359	-0.584547		14530	b0392	0.0977263	0.598382
14531	b0393	0.233292	1.43424		14531	b0393	0.125176	1.43424		14531	b0393	0.167073	1.03171
14532	b0394	0.111755	0.558486		14532	b0394	-0.130135	0.558486		14532	b0394	0.13996	0.561113
14534	b0396	-0.0395496	-0.300151		14534	b0396	-0.089542	-0.300151		14534	b0396	-0.0457731	-0.328815
14535	b0397	0.124775	0.781395		14535	b0397	0.219999	0.781395		14535	b0397	0.0445379	0.26892
14536	b0398	-0.0770456	-0.312475		14536	b0398	-0.177734	-0.312475		14536	b0398	-0.608921	-2.99059
14537	b0399	-0.154919	-0.847771		14537	b0399	-0.201178	-0.847771		14537	b0399	-0.0913426	-0.467312
14538	b0400	-0.696208	-3.02848		14538	b0400	-0.974016	-3.02848		14538	b0400	-0.765459	-3.01777
14539	b0401	-2.41893	-10.1061		14539	b0401	-2.09216	-10.1061		14539	b0401	-2.01831	-9.1039
14540	b0402	-0.00670298	-0.0450901		14540	b0402	-0.164076	-0.0450901		14540	b0402	-0.13119	-0.841345
14541	b0403	-0.0489409	-0.28443		14541	b0403	0.0476092	-0.28443		14541	b0403	-0.0554238	-0.324601
14542	b0404	-0.0577315	-0.189828		14542	b0404	0.266242	-0.189828		14542	b0404	0.455943	1.29242
14543	b0405	-0.680348	-2.27425		14543	b0405	-0.776263	-2.27425		14543	b0405	-0.285849	-0.797922
14544	b0406	-1.03542	-2.13314		14544	b0406	-0.74351	-2.13314		14544	b0406	-1.42397	-3.59113
14548	b0410	-0.151127	-0.478612		14548	b0410	-0.131068	-0.478612		14548	b0410	-0.244845	-0.722194
14549	b0411	-0.168172	-1.03464		14549	b0411	-0.0463065	-1.03464		14549	b0411	0.105745	0.683538
14550	b0412	-0.105676	-0.257004		14550	b0412	0.182768	-0.257004		14550	b0412	0.285216	0.991447
14556	b0418	-0.408712	-1.41763		14556	b0418	0.0784994	-1.41763		14556	b0418	-0.237496	-0.647029
14557	b0419	-0.038399	-0.187664		14557	b0419	0.0169989	-0.187664		14557	b0419	-0.16652	-0.684529
14561	b0423	0.0563358	0.267629		14561	b0423	0.231544	0.267629		14561	b0423	0.23076	0.832709
14562	b0424	0.0230507	0.112178		14562	b0424	0.121721	0.112178		14562	b0424	0.0182542	0.081431
14563	b0425	-0.0979339	-0.499554		14563	b0425	0.00486928	-0.499554		14563	b0425	-0.174255	-0.975874
14564	b0426	0.303029	1.24203		14564	b0426	0.542701	1.24203		14564	b0426	0.292948	1.3458
14565	b0427	-0.625441	-3.53938		14565	b0427	-0.60381	-3.53938		14565	b0427	-0.281875	-1.69071
14566	b0428	-0.874532	-3.53818		14566	b0428	-1.18738	-3.53818		14566	b0428	-0.534509	-2.41502
14567	b0429	-0.623569	-1.55842		14567	b0429	-0.573062	-1.55842		14567	b0429	-0.0820796	-0.239644
14568	b0430	-0.771686	-2.21815		14568	b0430	-1.46915	-2.21815		14568	b0430	-1.00084	-2.72514
14569	b0431	-0.753041	-4.7816		14569	b0431	-0.659384	-4.7816		14569	b0431	-0.31227	-1.81114
14570	b0432	-0.567938	-3.28465		14570	b0432	-0.419363	-3.28465		14570	b0432	-0.237819	-1.38371
14571	b0433	-0.176499	-1.39375		14571	b0433	-0.0890958	-1.39375		14571	b0433	0.0117425	0.0943413
14572	b0434	-0.316816	-1.66689		14572	b0434	-0.158907	-1.66689		14572	b0434	-0.0843813	-0.425132
14573	b0435	0.0895596	0.407223		14573	b0435	-0.134924	0.407223		14573	b0435	-0.243324	-0.947777
14574	b0436	-0.210689	-0.955237		14574	b0436	0.131831	-0.955237		14574	b0436	0.107181	0.563234
14578	b0440	0.346057	1.1698		14578	b0440	-0.0266329	1.1698		14578	b0440	0.20501	0.566912
14579	b0441	-0.118757	-0.818531		14579	b0441	-0.328269	-0.818531		14579	b0441	-0.260288	-1.81756
14580	b0442	0.148042	0.487108		14580	b0442	0.224374	0.487108		14580	b0442	0.0452129	0.203454
14581	b0443	-0.0613286	-0.245302		14581	b0443	0.154737	-0.245302		14581	b0443	-0.230819	-1.01684
14582	b0444	0.095447	0.605054		14582	b0444	0.113346	0.605054		14582	b0444	-0.109126	-0.60211
14583	b0445	-0.0505874	-0.307035		14583	b0445	-0.218799	-0.307035		14583	b0445	-0.156971	-1.03772
14584	b0446	0.00298264	0.0159317		14584	b0446	-0.531826	0.0159317		14584	b0446	-0.240176	-1.19131
14585	b0447	-0.23031	-0.962135		14585	b0447	-0.131961	-0.962135		14585	b0447	0.0672738	0.291859
14586	b0448	-0.121642	-0.64502		14586	b0448	-0.132976	-0.64502		14586	b0448	-0.165894	-1.11313
14587	b0449	-0.310625	-1.88016		14587	b0449	-0.231719	-1.88016		14587	b0449	-0.322548	-1.69005
14588	b0450	-0.812404	-1.7708		14588	b0450	-1.33498	-1.7708		14588	b0450	-0.697351	-1.63367
14589	b0451	-0.0722703	-0.437036		14589	b0451	-0.127649	-0.437036		14589	b0451	-0.0591562	-0.385224
14590	b0452	0.0471644	0.238054		14590	b0452	0.0197673	0.238054		14590	b0452	0.206007	0.996972
14591	b0453	0.0821326	0.412045		14591	b0453	-0.0500003	0.412045		14591	b0453	-0.0775851	-0.315912
14592	b0454	-0.0358913	-0.17971		14592	b0454	-0.187756	-0.17971		14592	b0454	-0.443549	-1.87506
14593	b0456	0.347745	0.879032		14593	b0456	0.0196759	0.879032		14593	b0456	0.181034	0.399747
14594	b0457	-0.166648	-1.23846		14594	b0457	-0.316418	-1.23846		14594	b0457	-0.096497	-0.739325
14595	b0458	-0.148672	-0.693545		14595	b0458	-0.0968075	-0.693545		14595	b0458	-0.0638938	-0.268602
14596	b0459	-0.0545451	-0.359565		14596	b0459	0.242067	-0.359565		14596	b0459	-0.0755371	-0.507188
14597	b0460	-1.72656	-3.56462		14597	b0460	-0.981813	-3.56462		14597	b0460	-0.230772	-0.765429
14598	b0461	-0.233702	-1.15104		14598	b0461	0.00259183	-1.15104		14598	b0461	-0.0419854	-0.20579
14599	b0462	0.0316407	0.237143		14599	b0462	-0.236565	0.237143		14599	b0462	-0.152299	-1.13739
14600	b0463	0.118928	0.756049		14600	b0463	-0.397129	0.756049		14600	b0463	-0.172504	-1.18165
14601	b0464	0.107299	0.673555		14601	b0464	-0.0217172	0.673555		14601	b0464	-0.016003	-0.0952922
14602	b0465	-0.103765	-0.805759		14602	b0465	-0.095154	-0.805759		14602	b0465	-0.142148	-1.06342
14604	b0467	-0.0636316	-0.269217		14604	b0467	-0.229287	-0.269217		14604	b0467	-0.0866919	-0.400816
14605	b0468	-0.216038	-0.785964		14605	b0468	-0.144708	-0.785964		14605	b0468	-0.132236	-0.523914
14606	b0469	-0.44493	-2.23066		14606	b0469	-0.397017	-2.23066		14606	b0469	-0.475037	-1.97179
14608	b0471	-0.174015	-0.227634		14608	b0471	-0.10117	-0.227634		14608	b0471	-0.39493	-0.685195
14609	b0472	-0.17928	-0.908024		14609	b0472	-0.405997	-0.908024		14609	b0472	-0.136815	-0.701583
14610	b0473	0.00431442	0.0281565		14610	b0473	-0.268255	0.0281565		14610	b0473	-0.222423	-1.44255
14613	b0476	0.0858509	0.386107		14613	b0476	-0.282919	0.386107		14613	b0476	-0.112602	-0.561116
14614	b0477	-0.0077018	-0.0451152		14614	b0477	-0.442403	-0.0451152		14614	b0477	-0.32834	-2.07209
14615	b0478	-0.234738	-1.51021		14615	b0478	-0.535479	-1.51021		14615	b0478	-0.241976	-1.41729
14616	b0479	-0.100717	-0.476591		14616	b0479	-0.340573	-0.476591		14616	b0479	-0.29995	-1.22971
14617	b0480	-0.00518204	-0.0351122		14617	b0480	-0.0960354	-0.0351122		14617	b0480	-0.110063	-0.520567
14618	b0481	-0.204826	-0.55054		14618	b0481	0.0306005	-0.55054		14618	b0481	-0.127866	-0.300636
14619	b0482	-0.0219893	-0.130238		14619	b0482	-0.0467908	-0.130238		14619	b0482	0.189563	1.00427
14620	b0483	-0.0482551	-0.17045		14620	b0483	-0.0627487	-0.17045		14620	b0483	-0.125604	-0.319694
14621	b0484	-0.0639722	-0.440786		14621	b0484	-0.464586	-0.440786		14621	b0484	-0.268494	-1.8735
14622	b0485	-0.289588	-1.61654		14622	b0485	-0.186849	-1.61654		14622	b0485	-0.361917	-1.66855
14623	b0486	0.112769	0.558752		14623	b0486	-0.0129261	0.558752		14623	b0486	0.207631	0.972487
14624	b0487	0.0281688	0.121717		14624	b0487	0.0933702	0.121717		14624	b0487	0.103196	0.449634
14625	b0488	-0.39149	-1.44793		14625	b0488	-0.461574	-1.44793		14625	b0488	-0.647525	-2.14458
14626	b0489	0.222309	0.79567		14626	b0489	-0.00659278	0.79567		14626	b0489	0.142032	0.616455
14627	b0490	-0.306698	-1.22612		14627	b0490	-0.561977	-1.22612		14627	b0490	-0.422873	-1.75227
14628	b0491	0.145372	0.705258		14628	b0491	-0.144178	0.705258		14628	b0491	-0.275845	-0.984004
14629	b0492	-0.18358	-0.869796		14629	b0492	-0.0427511	-0.869796		14629	b0492	0.109809	0.495594
14630	b0493	0.000128068	0.000632719		14630	b0493	-0.154028	0.000632719		14630	b0493	0.0710819	0.271347
14631	b0494	-0.141841	-0.809466		14631	b0494	-0.175453	-0.809466		14631	b0494	-0.0197889	-0.0802408
14632	b0495	-0.299106	-1.08095		14632	b0495	-0.431415	-1.08095		14632	b0495	-0.452257	-1.60514
14633	b0496	0.433695	2.81894		14633	b0496	0.322801	2.81894		14633	b0496	0.197793	1.1645
14634	b0497	0.120525	0.954853		14634	b0497	0.0270572	0.954853		14634	b0497	-0.00463027	-0.0361301
14636	b0499	-0.864523	-1.74428		14636	b0499	-0.70429	-1.74428		14636	b0499	-1.59188	-2.82139
14640	b0503	0.296901	0.996486		14640	b0503	0.390394	0.996486		14640	b0503	0.625664	2.99747
14641	b0504	0.47963	1.09418		14641	b0504	0.147029	1.09418		14641	b0504	-0.104403	-0.252478
14642	b0505	-0.492948	-1.03925		14642	b0505	-0.48688	-1.03925		14642	b0505	-0.0306588	-0.120981
14643	b0506	-0.00814932	-0.0271561		14643	b0506	-0.387785	-0.0271561		14643	b0506	-0.337237	-1.119
14644	b0507	0.119625	0.657779		14644	b0507	0.00438493	0.657779		14644	b0507	-0.022656	-0.120029
14646	b0509	0.322185	1.39093		14646	b0509	-0.172528	1.39093		14646	b0509	0.120672	0.480571
14648	b0511	-0.212721	-1.3025		14648	b0511	-0.312967	-1.3025		14648	b0511	-0.332816	-2.09703
14649	b0512	0.305372	2.08731		14649	b0512	0.286772	2.08731		14649	b0512	0.47743	3.07284
14650	b0513	0.238413	1.69496		14650	b0513	0.216768	1.69496		14650	b0513	0.160313	1.14697
14651	b0514	0.307671	1.7797		14651	b0514	0.363123	1.7797		14651	b0514	0.327755	1.97742
14652	b0515	0.0312172	0.197848		14652	b0515	0.11751	0.197848		14652	b0515	0.151202	1.05392
14653	b0516	-0.0252331	-0.18905		14653	b0516	-0.166397	-0.18905		14653	b0516	-0.210959	-1.52335
14654	b0517	0.178885	0.955721		14654	b0517	-0.236538	0.955721		14654	b0517	-0.0842417	-0.471707
14655	b0518	-0.00279898	-0.015758		14655	b0518	0.213859	-0.015758		14655	b0518	0.116054	0.622696
14657	b0520	0.480929	1.65086		14657	b0520	0.305001	1.65086		14657	b0520	0.454756	1.77227
14658	b0521	-0.160511	-0.615389		14658	b0521	-0.573872	-0.615389		14658	b0521	0.115555	0.5077
14659	b0522	-0.214873	-0.753282		14659	b0522	-0.826837	-0.753282		14659	b0522	-0.432446	-1.74661
14660	b0523	-0.372032	-1.08899		14660	b0523	-0.923036	-1.08899		14660	b0523	-0.595945	-1.64017
14664	b0527	0.28811	0.67458		14664	b0527	0.242777	0.67458		14664	b0527	0.165771	0.515171
14668	b0531	-0.501355	-1.63259		14668	b0531	-0.269488	-1.63259		14668	b0531	-0.240848	-0.760064
14669	b0532	-0.100086	-0.682329		14669	b0532	-0.44191	-0.682329		14669	b0532	-0.279689	-1.99847
14670	b0533	-0.111609	-0.434904		14670	b0533	-0.562317	-0.434904		14670	b0533	-0.305047	-1.09916
14671	b0534	0.0644022	0.287687		14671	b0534	-0.0268713	0.287687		14671	b0534	-0.0643923	-0.247524
14673	b0537	0.273456	1.63054		14673	b0537	0.110164	1.63054		14673	b0537	0.164172	1.10005
14674	b4508	0.447636	1.44644		14674	b4508	0.837406	1.44644		14674	b4508	0.636366	2.13049
14675	b0539	0.247513	1.17807		14675	b0539	0.0660599	1.17807		14675	b0539	0.0883195	0.438451
14679	b0543	0.227843	1.65228		14679	b0543	0.185191	1.65228		14679	b0543	0.0330111	0.228956
14681	b0545	0.124655	0.672011		14681	b0545	-0.205935	0.672011		14681	b0545	-0.135348	-0.667354
14682	b0546	0.236379	0.822961		14682	b0546	0.120409	0.822961		14682	b0546	0.0307122	0.089608
14683	b0547	-0.300165	-1.08681		14683	b0547	0.174407	-1.08681		14683	b0547	-0.0146722	-0.0510276
14684	b0548	-0.0241233	-0.0512533		14684	b0548	0.128045	-0.0512533		14684	b0548	0.309033	0.611552
14686	b0550	-0.255015	-0.585186		14686	b0550	-0.997367	-0.585186		14686	b0550	0.0756711	0.180327
14687	b0551	0.207383	1.25616		14687	b0551	0.034833	1.25616		14687	b0551	0.102519	0.634267
14689	b0553	0.505605	3.45584		14689	b0553	0.316765	3.45584		14689	b0553	0.297676	1.90417
14690	b0554	0.163018	1.06319		14690	b0554	0.271708	1.06319		14690	b0554	0.103468	0.642596
14691	b0555	0.22763	1.38612		14691	b0555	-0.0468246	1.38612		14691	b0555	0.0930281	0.537524
14692	b0556	0.305123	1.1935		14692	b0556	0.193793	1.1935		14692	b0556	-0.0774202	-0.230248
14693	b0557	0.373464	1.60944		14693	b0557	0.516264	1.60944		14693	b0557	0.462729	1.66877
14695	b0559	-0.279434	-1.24039		14695	b0559	-0.156568	-1.24039		14695	b0559	-0.157897	-0.609895
14697	b0561	0.64861	2.11619		14697	b0561	0.58406	2.11619		14697	b0561	0.662414	2.51374
14698	b0562	0.0643088	0.413558		14698	b0562	0.147649	0.413558		14698	b0562	0.0282561	0.188333
14699	b0563	-0.271118	-1.02168		14699	b0563	-0.419994	-1.02168		14699	b0563	-0.330021	-1.07416
14701	b0565	0.434064	3.19797		14701	b0565	0.267022	3.19797		14701	b0565	0.371855	2.63009
14702	b0566	0.159618	0.883226		14702	b0566	-0.125336	0.883226		14702	b0566	0.0880407	0.489484
14703	b0567	0.255971	1.43256		14703	b0567	0.185093	1.43256		14703	b0567	0.184805	1.36179
14704	b0568	0.149356	1.05354		14704	b0568	0.105904	1.05354		14704	b0568	0.244729	1.60871
14705	b0569	-0.0800395	-0.460963		14705	b0569	0.11961	-0.460963		14705	b0569	0.111062	0.668554
14706	b0570	0.169104	0.877139		14706	b0570	0.0327747	0.877139		14706	b0570	-0.0201368	-0.106299
14707	b0571	0.0508195	0.306347		14707	b0571	0.464287	0.306347		14707	b0571	0.186586	0.980485
14708	b0572	-0.0618708	-0.447627		14708	b0572	-0.00518015	-0.447627		14708	b0572	-0.0143249	-0.104575
14709	b0573	0.221343	1.5554		14709	b0573	0.0112522	1.5554		14709	b0573	0.174636	1.19114
14710	b0574	0.260436	1.32867		14710	b0574	0.198772	1.32867		14710	b0574	0.232366	1.17759
14711	b0575	0.263352	1.70775		14711	b0575	0.00981205	1.70775		14711	b0575	0.231676	1.57224
14712	b0576	0.0554555	0.321576		14712	b0576	0.202003	0.321576		14712	b0576	0.100939	0.531589
14713	b0577	0.0211011	0.180119		14713	b0577	0.0891041	0.180119		14713	b0577	0.0811371	0.671295
14714	b0578	-0.0413018	-0.242964		14714	b0578	-0.105081	-0.242964		14714	b0578	-0.0585763	-0.349244
14715	b0579	0.18154	0.507097		14715	b0579	0.629118	0.507097		14715	b0579	0.62097	1.77277
14716	b0580	-0.529666	-0.873509		14716	b0580	-0.0792887	-0.873509		14716	b0580	-0.261678	-0.683123
14717	b0581	0.128193	0.72021		14717	b0581	0.17262	0.72021		14717	b0581	-0.140731	-0.90579
14719	b0583	0.0386766	0.0836483		14719	b0583	0.571489	0.0836483		14719	b0583	0.687894	2.04609
14720	b0584	-0.953028	-5.39691		14720	b0584	-1.06041	-5.39691		14720	b0584	-1.10472	-6.70489
14721	b0585	-1.91374	-4.651		14721	b0585	-1.98285	-4.651		14721	b0585	-2.34856	-5.69295
14722	b0586	0.045186	0.321382		14722	b0586	0.162399	0.321382		14722	b0586	0.183728	1.22554
14723	b0587	-0.222415	-1.253		14723	b0587	-0.212953	-1.253		14723	b0587	-0.379162	-2.03092
14724	b0588	-0.797163	-3.35651		14724	b0588	-1.42016	-3.35651		14724	b0588	-1.08598	-4.8017
14725	b0589	-0.758271	-3.59492		14725	b0589	-1.21334	-3.59492		14725	b0589	-1.49183	-4.36586
14726	b0590	-1.02336	-4.31734		14726	b0590	-1.82349	-4.31734		14726	b0590	-1.17269	-5.3752
14727	b0591	0.0224172	0.130786		14727	b0591	-0.0426299	0.130786		14727	b0591	0.0264215	0.162337
14728	b0592	-1.10877	-4.61619		14728	b0592	-1.35205	-4.61619		14728	b0592	-1.77509	-6.86327
14729	b0593	0.0202765	0.109899		14729	b0593	-0.0331133	0.109899		14729	b0593	0.278115	1.51524
14730	b0594	-0.0765452	-0.341465		14730	b0594	-0.205024	-0.341465		14730	b0594	-0.0320298	-0.16033
14731	b0595	0.121454	0.648538		14731	b0595	0.0187301	0.648538		14731	b0595	0.0407368	0.210169
14732	b0596	0.121599	0.541315		14732	b0596	0.148364	0.541315		14732	b0596	-0.0347366	-0.171472
14733	b0597	-0.346084	-1.00578		14733	b0597	-0.171018	-1.00578		14733	b0597	-0.0219338	-0.0655655
14734	b0598	-0.0425163	-0.317429		14734	b0598	0.013605	-0.317429		14734	b0598	-0.0457287	-0.313985
14736	b0599	-0.183201	-1.0902		14736	b0599	-0.0902392	-1.0902		14736	b0599	-0.110698	-0.596751
14737	b0600	-0.175489	-1.04574		14737	b0600	0.125356	-1.04574		14737	b0600	-0.0673094	-0.326823
14738	b0601	-0.156492	-0.798122		14738	b0601	0.0937078	-0.798122		14738	b0601	0.158693	0.959821
14739	b0602	-0.0134083	-0.0752249		14739	b0602	-0.0581507	-0.0752249		14739	b0602	0.0608551	0.310861
14741	b0604	0.329995	1.68197		14741	b0604	0.00258576	1.68197		14741	b0604	0.0169816	0.0554831
14742	b0605	-0.576539	-0.959247		14742	b0605	-0.480102	-0.959247		14742	b0605	-0.750505	-1.84439
14743	b0606	-0.174708	-0.797623		14743	b0606	-0.284101	-0.797623		14743	b0606	-0.156247	-0.705412
14744	b0607	-0.239318	-1.27422		14744	b0607	-0.0786586	-1.27422		14744	b0607	0.118172	0.7013
14745	b0608	0.30357	1.60014		14745	b0608	0.333889	1.60014		14745	b0608	0.388049	1.92373
14747	b0610	0.135653	0.271454		14747	b0610	0.461778	0.271454		14747	b0610	0.549181	1.1245
14748	b0611	0.327674	0.871458		14748	b0611	-0.459291	0.871458		14748	b0611	-0.594844	-2.10284
14749	b0612	-0.117973	-0.657349		14749	b0612	-0.09862	-0.657349		14749	b0612	-0.0144983	-0.0746817
14750	b0613	0.183633	0.605635		14750	b0613	0.317503	0.605635		14750	b0613	0.424701	1.05427
14752	b0615	0.158164	0.642466		14752	b0615	0.235517	0.642466		14752	b0615	-0.0170918	-0.0814753
14753	b0616	-0.00441073	-0.0205178		14753	b0616	-0.515172	-0.0205178		14753	b0616	-0.0461312	-0.188268
14755	b0618	-0.0918248	-0.439612		14755	b0618	-0.0338319	-0.439612		14755	b0618	-0.157861	-0.630989
14756	b0619	-1.17066	-5.63676		14756	b0619	-1.18792	-5.63676		14756	b0619	-1.20904	-5.3183
14757	b0620	0.295614	2.03337		14757	b0620	0.327904	2.03337		14757	b0620	0.277251	1.69963
14758	b0621	0.0815915	0.40842		14758	b0621	0.166285	0.40842		14758	b0621	0.218842	1.26254
14759	b0622	-0.00790234	-0.0375342		14759	b0622	0.0203747	-0.0375342		14759	b0622	-0.178274	-0.683022
14761	b0624	0.104106	0.315826		14761	b0624	0.399716	0.315826		14761	b0624	0.0992986	0.247913
14766	b0629	-0.0120375	-0.0789279		14766	b0629	0.041643	-0.0789279		14766	b0629	0.112835	0.665803
14769	b0632	-0.811008	-3.16208		14769	b0632	-0.530725	-3.16208		14769	b0632	-0.638977	-2.2687
14770	b0633	0.0580778	0.360007		14770	b0633	-0.0205571	0.360007		14770	b0633	0.00391127	0.0217803
14773	b0636	0.559947	2.5752		14773	b0636	0.452862	2.5752		14773	b0636	0.508475	2.87066
14775	b0638	0.0600451	0.239329		14775	b0638	0.0906083	0.239329		14775	b0638	0.0356342	0.197905
14778	b0641	0.0447392	0.102172		14778	b0641	0.188624	0.102172		14778	b0641	0.0906908	0.208305
14780	b0643	-0.129448	-0.545613		14780	b0643	-0.340384	-0.545613		14780	b0643	-0.318941	-1.40504
14781	b0644	-0.0603051	-0.310012		14781	b0644	-0.086707	-0.310012		14781	b0644	0.0705627	0.39048
14782	b0645	0.101564	0.41107		14782	b0645	-0.345699	0.41107		14782	b0645	-0.199081	-0.719001
14783	b0646	-0.129879	-0.860693		14783	b0646	0.174377	-0.860693		14783	b0646	-0.142521	-1.01105
14784	b0647	-0.214143	-0.655792		14784	b0647	-0.397312	-0.655792		14784	b0647	-0.558854	-1.51898
14785	b0648	-0.5966	-2.19964		14785	b0648	-0.360754	-2.19964		14785	b0648	0.0147632	0.0607343
14786	b0649	0.0428888	0.185199		14786	b0649	0.0307501	0.185199		14786	b0649	-0.120523	-0.499749
14787	b0650	-0.0626361	-0.356309		14787	b0650	-0.111624	-0.356309		14787	b0650	-0.128	-0.731056
14788	b0651	0.0150122	0.09928		14788	b0651	-0.230325	0.09928		14788	b0651	-0.299043	-1.75047
14789	b0652	-0.238259	-0.834452		14789	b0652	-0.116613	-0.834452		14789	b0652	0.135827	0.626709
14790	b0653	-0.10894	-0.400725		14790	b0653	0.0153996	-0.400725		14790	b0653	0.160737	0.666967
14791	b0654	-0.0503789	-0.237402		14791	b0654	-0.0958698	-0.237402		14791	b0654	-0.205832	-1.08643
14792	b0655	-0.21669	-1.00459		14792	b0655	-0.2958	-1.00459		14792	b0655	-0.610586	-1.71736
14797	b0660	-1.08782	-3.1712		14797	b0660	-0.507526	-3.1712		14797	b0660	-1.11228	-4.15362
14798	b0661	-0.0298243	-0.166525		14798	b0661	0.0954749	-0.166525		14798	b0661	-0.107143	-0.623511
14804	b0674	-0.273518	-1.46277		14804	b0674	-0.161631	-1.46277		14804	b0674	-0.148808	-0.917047
14805	b0675	0.109124	0.313824		14805	b0675	0.310331	0.313824		14805	b0675	0.1622	0.573665
14806	b0676	-0.964893	-3.95566		14806	b0676	-0.211784	-3.95566		14806	b0676	-0.947507	-4.42194
14807	b0677	-0.89437	-1.93858		14807	b0677	-0.229752	-1.93858		14807	b0677	-0.745611	-1.73575
14808	b0678	0.107775	0.308492		14808	b0678	-0.276468	0.308492		14808	b0678	0.0277613	0.0846957
14809	b0679	-0.0376063	-0.227874		14809	b0679	-0.145577	-0.227874		14809	b0679	0.0557251	0.332772
14811	b0681	-0.275658	-1.6324		14811	b0681	-0.310562	-1.6324		14811	b0681	-0.205284	-1.16699
14812	b0682	0.0773232	0.203215		14812	b0682	-0.561773	0.203215		14812	b0682	0.0922504	0.295713
14815	b0685	-0.201085	-0.448899		14815	b0685	0.0959459	-0.448899		14815	b0685	-0.160328	-0.391576
14816	b0686	0.134765	0.568153		14816	b0686	0.182644	0.568153		14816	b0686	0.208771	0.842862
14819	b0689	0.214846	1.37773		14819	b0689	0.325849	1.37773		14819	b0689	0.174459	0.994815
14821	b0691	-0.329432	-1.83449		14821	b0691	-0.253786	-1.83449		14821	b0691	-0.147037	-0.836326
14823	b0692	0.372142	2.07128		14823	b0692	0.33515	2.07128		14823	b0692	0.350849	2.10678
14824	b0693	-0.461233	-2.57997		14824	b0693	-0.143195	-2.57997		14824	b0693	-0.557142	-3.2955
14826	b0694	0.241452	0.898726		14826	b0694	0.390428	0.898726		14826	b0694	0.260653	1.11789
14827	b0695	0.0573504	0.355353		14827	b0695	0.306245	0.355353		14827	b0695	0.303929	1.77394
14828	b0696	-0.553502	-1.11349		14828	b0696	-0.544118	-1.11349		14828	b0696	-0.241962	-0.86217
14829	b0697	-0.273122	-1.35398		14829	b0697	-0.358238	-1.35398		14829	b0697	-0.0596244	-0.3267
14830	b0698	-0.0553685	-0.331366		14830	b0698	0.216511	-0.331366		14830	b0698	0.0228584	0.138523
14833	b0700	-0.115038	-0.552081		14833	b0700	-0.109453	-0.552081		14833	b0700	0.106905	0.522609
14835	b0703	0.0346116	0.241678		14835	b0703	0.0363934	0.241678		14835	b0703	0.0723796	0.509942
14839	b0707	0.464853	1.04968		14839	b0707	0.191783	1.04968		14839	b0707	0.0654691	0.117912
14840	b0708	0.0226381	0.0806795		14840	b0708	0.100342	0.0806795		14840	b0708	-0.0121638	-0.0502264
14841	b0709	0.0223843	0.14424		14841	b0709	0.042978	0.14424		14841	b0709	0.130745	0.866895
14842	b0710	0.0345751	0.0727752		14842	b0710	0.17205	0.0727752		14842	b0710	-0.238002	-0.851657
14843	b0711	0.387329	1.66278		14843	b0711	-0.00760981	1.66278		14843	b0711	0.455045	2.00453
14844	b0712	-0.381635	-1.61675		14844	b0712	-0.15192	-1.61675		14844	b0712	-0.180828	-0.76171
14845	b0713	0.0877943	0.359791		14845	b0713	0.18828	0.359791		14845	b0713	0.164981	0.729372
14846	b0714	-0.100497	-0.443884		14846	b0714	-0.141161	-0.443884		14846	b0714	0.077475	0.260965
14847	b0715	0.0458256	0.20859		14847	b0715	-0.105609	0.20859		14847	b0715	-0.0283178	-0.102002
14848	b0716	0.0286036	0.185129		14848	b0716	-0.00310461	0.185129		14848	b0716	-0.020841	-0.121994
14849	b0717	-0.0787567	-0.358577		14849	b0717	-0.0270154	-0.358577		14849	b0717	-0.200636	-0.805555
14850	b0718	-0.268295	-1.974		14850	b0718	-0.120751	-1.974		14850	b0718	-0.0242987	-0.178451
14851	b0719	-0.0869576	-0.591693		14851	b0719	0.173713	-0.591693		14851	b0719	0.121131	0.794725
14852	b0720	-0.628517	-2.01462		14852	b0720	-0.4313	-2.01462		14852	b0720	-0.748315	-2.93394
14853	b0721	0.0442459	0.125226		14853	b0721	-1.13546	0.125226		14853	b0721	-0.440075	-1.38792
14855	b0723	-0.407231	-2.28005		14855	b0723	-0.679355	-2.28005		14855	b0723	-0.636007	-3.38634
14856	b0724	-0.42992	-1.19011		14856	b0724	-0.722161	-1.19011		14856	b0724	-0.84073	-2.65201
14860	b0728	-0.0461497	-0.197205		14860	b0728	-0.598816	-0.197205		14860	b0728	-0.505926	-2.16222
14861	b0729	-1.14308	-2.70979		14861	b0729	-0.710286	-2.70979		14861	b0729	-1.12925	-2.67635
14863	b0731	-0.0965922	-0.558627		14863	b0731	0.0045101	-0.558627		14863	b0731	0.00686727	0.0320636
14864	b0732	0.0844745	0.670617		14864	b0732	0.151681	0.670617		14864	b0732	0.0997627	0.800329
14867	b0735	0.426203	1.84495		14867	b0735	0.226076	1.84495		14867	b0735	0.561484	2.43217
14868	b0736	0.215331	0.710106		14868	b0736	0.390833	0.710106		14868	b0736	0.25964	0.778109
14874	b0742	-0.376576	-1.49298		14874	b0742	0.170845	-1.49298		14874	b0742	-0.0395778	-0.169139
14875	b0750	-0.104609	-0.428036		14875	b0750	-0.0567442	-0.428036		14875	b0750	-0.1163	-0.502045
14876	b0751	-0.171597	-0.786335		14876	b0751	0.108675	-0.786335		14876	b0751	0.0659583	0.264814
14877	b0752	-0.383566	-1.56313		14877	b0752	-0.157441	-1.56313		14877	b0752	-0.0161511	-0.0546543
14878	b0753	-0.241145	-0.549408		14878	b0753	-0.121236	-0.549408		14878	b0753	-0.405128	-1.54185
14879	b0754	-0.222343	-1.15384		14879	b0754	-0.228376	-1.15384		14879	b0754	0.24646	1.32729
14880	b0755	-0.197085	-0.8473		14880	b0755	-0.136836	-0.8473		14880	b0755	-0.211399	-0.921374
14881	b0756	0.0434931	0.151077		14881	b0756	0.236554	0.151077		14881	b0756	0.252292	1.19161
14882	b0757	0.551353	2.87895		14882	b0757	0.203358	2.87895		14882	b0757	0.252771	1.32058
14883	b0758	-1.3084	-1.92759		14883	b0758	-2.21265	-1.92759		14883	b0758	-1.51037	-2.18624
14884	b0759	-1.52655	-5.13953		14884	b0759	-2.02532	-5.13953		14884	b0759	-1.89618	-4.91202
14885	b0760	-0.119175	-0.526602		14885	b0760	-0.00267913	-0.526602		14885	b0760	-0.29408	-1.53786
14886	b0761	0.16611	0.719354		14886	b0761	0.153047	0.719354		14886	b0761	0.0188187	0.084907
14888	b0763	-0.27199	-1.13766		14888	b0763	0.0558975	-1.13766		14888	b0763	-0.129649	-0.47758
14889	b0764	-0.309016	-1.33483		14889	b0764	-0.160573	-1.33483		14889	b0764	-0.533279	-1.84956
14890	b0765	0.154224	0.424802		14890	b0765	0.553799	0.424802		14890	b0765	0.175598	0.645309
14891	b0766	-0.311656	-1.27661		14891	b0766	-0.0606897	-1.27661		14891	b0766	0.118995	0.598099
14893	b0768	-0.044249	-0.16716		14893	b0768	0.0115954	-0.16716		14893	b0768	-0.0761478	-0.297885
14894	b0769	-0.290636	-1.467		14894	b0769	0.142596	-1.467		14894	b0769	0.0814338	0.37793
14895	b0770	0.0855375	0.581245		14895	b0770	0.0389739	0.581245		14895	b0770	0.102968	0.69
14896	b0771	-0.098682	-0.661829		14896	b0771	0.0999976	-0.661829		14896	b0771	-0.077307	-0.563924
14897	b0772	0.139497	0.740971		14897	b0772	0.0796599	0.740971		14897	b0772	0.0877394	0.58719
14898	b0773	0.143925	0.534398		14898	b0773	0.383218	0.534398		14898	b0773	0.613627	2.21219
14899	b0774	0.0589869	0.188846		14899	b0774	0.0927357	0.188846		14899	b0774	0.163559	0.533082
14900	b0775	-0.168847	-0.637471		14900	b0775	-0.00777429	-0.637471		14900	b0775	0.217301	0.791666
14901	b0776	-0.169852	-0.783423		14901	b0776	0.081125	-0.783423		14901	b0776	-0.162395	-0.841313
14902	b0777	-0.0519069	-0.23641		14902	b0777	-0.327534	-0.23641		14902	b0777	-0.140507	-0.404996
14903	b0778	0.25204	0.827284		14903	b0778	0.378446	0.827284		14903	b0778	0.23503	0.566234
14904	b0779	-0.0339985	-0.17648		14904	b0779	-0.0282992	-0.17648		14904	b0779	0.0854771	0.52253
14905	b0780	0.391257	1.6246		14905	b0780	-0.0501512	1.6246		14905	b0780	0.104318	0.438717
14906	b0781	0.00353707	0.0125255		14906	b0781	0.00855287	0.0125255		14906	b0781	0.280072	1.45474
14908	b0783	0.0470512	0.190445		14908	b0783	-0.0194027	0.190445		14908	b0783	0.187213	0.793645
14909	b0784	0.269986	0.563646		14909	b0784	-0.369227	0.563646		14909	b0784	0.30741	0.601021
14910	b0785	0.193438	0.666571		14910	b0785	0.422314	0.666571		14910	b0785	0.385576	1.59302
14911	b0786	0.0256469	0.185004		14911	b0786	-0.0177349	0.185004		14911	b0786	-0.125035	-0.762982
14913	b0788	-0.26703	-1.02204		14913	b0788	-0.230959	-1.02204		14913	b0788	-0.104578	-0.371915
14914	b0789	0.0400035	0.138273		14914	b0789	0.0108639	0.138273		14914	b0789	-0.150986	-0.459387
14915	b0790	-0.191079	-0.895169		14915	b0790	-0.15287	-0.895169		14915	b0790	0.0585499	0.164678
14916	b0791	0.0848036	0.234043		14916	b0791	-0.585882	0.234043		14916	b0791	-0.22707	-0.411957
14917	b0792	0.0968014	0.358202		14917	b0792	0.0237996	0.358202		14917	b0792	-0.000257384	-0.00120086
14918	b0793	0.0242432	0.0995063		14918	b0793	-0.163184	0.0995063		14918	b0793	-0.168519	-0.778402
14919	b0794	-0.0183153	-0.0841866		14919	b0794	0.152325	-0.0841866		14919	b0794	-0.0251748	-0.114047
14920	b0795	-0.0958325	-0.504241		14920	b0795	0.0523023	-0.504241		14920	b0795	0.0874318	0.430481
14921	b0796	0.186777	0.73367		14921	b0796	0.154172	0.73367		14921	b0796	-0.0469597	-0.138091
14922	b0797	-0.30225	-1.39943		14922	b0797	-0.1803	-1.39943		14922	b0797	-0.195631	-0.896944
14924	b0799	0.0614305	0.255758		14924	b0799	-0.0299468	0.255758		14924	b0799	0.0526451	0.273163
14925	b0800	0.255222	0.760786		14925	b0800	0.038104	0.760786		14925	b0800	0.40735	1.74285
14926	b0801	0.291182	1.04862		14926	b0801	-0.100803	1.04862		14926	b0801	0.286971	1.52576
14927	b0802	-0.268553	-0.742303		14927	b0802	-0.392098	-0.742303		14927	b0802	0.0797038	0.209025
14928	b0803	-0.456383	-1.19269		14928	b0803	-0.129168	-1.19269		14928	b0803	-0.701358	-1.38822
14929	b0804	0.148877	0.498061		14929	b0804	-0.0331133	0.498061		14929	b0804	-0.0083379	-0.0350324
14930	b0805	-0.271723	-1.49638		14930	b0805	0.00457617	-1.49638		14930	b0805	-0.0182103	-0.0931203
14931	b0806	0.0258039	0.0501675		14931	b0806	-0.432345	0.0501675		14931	b0806	-0.200621	-0.239297
14932	b0807	-0.0773385	-0.390355		14932	b0807	-0.120923	-0.390355		14932	b0807	-0.159252	-0.813034
14933	b0808	-0.179352	-0.955073		14933	b0808	0.04669	-0.955073		14933	b0808	-0.058894	-0.320199
14934	b0809	-0.0862761	-0.342436		14934	b0809	-0.0493314	-0.342436		14934	b0809	0.122484	0.448408
14935	b0810	-0.230866	-0.780548		14935	b0810	-0.194351	-0.780548		14935	b0810	-0.192834	-0.695734
14936	b0811	0.291804	1.67476		14936	b0811	0.302789	1.67476		14936	b0811	0.079343	0.397882
14937	b0812	0.0407627	0.202068		14937	b0812	-0.184049	0.202068		14937	b0812	-0.167191	-0.843821
14938	b0813	0.28435	1.71028		14938	b0813	0.14477	1.71028		14938	b0813	0.472807	2.93291
14939	b0814	-0.510053	-1.20131		14939	b0814	-0.55204	-1.20131		14939	b0814	-0.280817	-0.852241
14940	b0815	0.0992882	0.506751		14940	b0815	0.0828575	0.506751		14940	b0815	0.100916	0.530668
14942	b0817	0.000841222	0.00308866		14942	b0817	-0.185714	0.00308866		14942	b0817	-0.0218772	-0.0752444
14943	b0818	-0.274973	-1.55704		14943	b0818	-0.30827	-1.55704		14943	b0818	-0.0710018	-0.343974
14944	b0819	-0.0170572	-0.0811734		14944	b0819	0.198331	-0.0811734		14944	b0819	0.0997425	0.489593
14945	b0820	-0.14223	-0.850818		14945	b0820	0.0496378	-0.850818		14945	b0820	-0.228505	-1.31706
14946	b0821	-0.138046	-0.674552		14946	b0821	-0.0850866	-0.674552		14946	b0821	-0.409464	-2.13963
14947	b0822	-0.427581	-1.68726		14947	b0822	-0.321173	-1.68726		14947	b0822	-0.193046	-0.759199
14948	b0823	0.0431383	0.257571		14948	b0823	0.242198	0.257571		14948	b0823	0.0440474	0.276475
14949	b0824	0.101713	0.567652		14949	b0824	0.0196397	0.567652		14949	b0824	0.0994018	0.506326
14950	b0825	0.329506	0.89535		14950	b0825	0.0338765	0.89535		14950	b0825	0.115627	0.466916
14951	b0826	-0.406361	-1.94038		14951	b0826	-0.224994	-1.94038		14951	b0826	-0.688738	-3.47528
14952	b0827	-0.151457	-0.568142		14952	b0827	-0.403137	-0.568142		14952	b0827	-0.243182	-0.925153
14953	b0828	0.312217	0.858502		14953	b0828	-0.13481	0.858502		14953	b0828	-0.136675	-0.344601
14954	b0829	0.0088879	0.0421347		14954	b0829	0.159662	0.0421347		14954	b0829	0.0468678	0.223365
14955	b0830	0.00499164	0.0273517		14955	b0830	-0.236737	0.0273517		14955	b0830	-0.421471	-2.21657
14956	b0831	-0.113532	-0.436403		14956	b0831	0.0887195	-0.436403		14956	b0831	0.340864	1.37278
14957	b0832	0.192205	1.08172		14957	b0832	0.318069	1.08172		14957	b0832	0.145407	0.81569
14958	b0833	-0.0199534	-0.125017		14958	b0833	0.01945	-0.125017		14958	b0833	-0.192269	-1.15492
14959	b0834	0.0499933	0.227158		14959	b0834	0.277967	0.227158		14959	b0834	0.0720741	0.274525
14960	b0835	-0.321714	-1.57511		14960	b0835	-0.271644	-1.57511		14960	b0835	-0.0791004	-0.363431
14962	b0837	0.194182	0.582495		14962	b0837	0.274221	0.582495		14962	b0837	0.0810201	0.242986
14963	b0838	-0.165153	-0.941892		14963	b0838	-0.234115	-0.941892		14963	b0838	-0.171066	-0.930276
14964	b0839	-0.164153	-0.853365		14964	b0839	-0.0989676	-0.853365		14964	b0839	-0.115617	-0.557937
14965	b0840	-0.0707045	-0.236044		14965	b0840	-0.816862	-0.236044		14965	b0840	-0.554087	-1.41909
14966	b0841	-0.149693	-0.454554		14966	b0841	-0.0535496	-0.454554		14966	b0841	0.337932	1.02786
14967	b0842	0.126265	0.8162		14967	b0842	-0.106592	0.8162		14967	b0842	0.276575	1.47051
14968	b0843	-0.269203	-0.511799		14968	b0843	-1.25398	-0.511799		14968	b0843	-0.00593199	-0.0163497
14969	b0844	0.127664	0.485113		14969	b0844	0.10076	0.485113		14969	b0844	0.23121	0.798852
14970	b0845	0.27921	1.38437		14970	b0845	0.338216	1.38437		14970	b0845	0.112059	0.502442
14971	b0846	-0.251483	-1.00453		14971	b0846	-0.319666	-1.00453		14971	b0846	-0.740972	-2.95471
14972	b0847	0.10834	0.701846		14972	b0847	0.0379022	0.701846		14972	b0847	0.0437335	0.248698
14973	b0848	-0.147774	-0.687699		14973	b0848	-0.326301	-0.687699		14973	b0848	-0.108552	-0.608711
14975	b0850	-0.496379	-0.852399		14975	b0850	-0.197922	-0.852399		14975	b0850	-0.229815	-0.464886
14976	b0851	0.62205	2.50951		14976	b0851	0.659666	2.50951		14976	b0851	0.355148	1.11358
14977	b0852	-0.0793974	-0.284941		14977	b0852	0.0708234	-0.284941		14977	b0852	-0.190733	-0.615374
14978	b0853	-0.139642	-0.372379		14978	b0853	-0.572887	-0.372379		14978	b0853	-0.264993	-0.817964
14979	b0854	-0.287283	-1.15713		14979	b0854	0.207651	-1.15713		14979	b0854	0.271961	1.11399
14980	b0855	0.0992503	0.564771		14980	b0855	0.156394	0.564771		14980	b0855	-0.0306357	-0.139664
14981	b0856	-0.382535	-1.32022		14981	b0856	-0.349286	-1.32022		14981	b0856	-0.507446	-1.20006
14982	b0857	-0.0657243	-0.156918		14982	b0857	-0.102998	-0.156918		14982	b0857	-0.330345	-1.02303
14984	b0859	-0.131474	-0.823565		14984	b0859	-0.109483	-0.823565		14984	b0859	-0.138083	-0.745401
14985	b0860	-0.16673	-0.821151		14985	b0860	0.0842807	-0.821151		14985	b0860	0.168551	0.758722
14986	b0861	-0.483031	-2.02645		14986	b0861	-0.269738	-2.02645		14986	b0861	-0.0824781	-0.434761
14987	b0862	-0.0311474	-0.074363		14987	b0862	-0.00125874	-0.074363		14987	b0862	0.110919	0.273683
14988	b0863	0.271021	1.04123		14988	b0863	-0.179126	1.04123		14988	b0863	-0.0687298	-0.252459
14989	b0864	0.219961	0.597841		14989	b0864	0.298484	0.597841		14989	b0864	0.534483	1.7191
14990	b0865	0.492493	1.35945		14990	b0865	-0.313202	1.35945		14990	b0865	0.327436	1.06005
14992	b0867	0.10467	0.555157		14992	b0867	0.0422044	0.555157		14992	b0867	0.299022	1.51854
14993	b0868	0.137704	0.816077		14993	b0868	0.241782	0.816077		14993	b0868	0.134193	0.653689
14994	b0869	-0.194104	-0.693122		14994	b0869	-0.0730052	-0.693122		14994	b0869	0.145983	0.599621
14995	b0870	-0.465589	-1.7915		14995	b0870	-0.171583	-1.7915		14995	b0870	-0.299299	-1.22264
14996	b0871	-0.222262	-1.24361		14996	b0871	-0.187819	-1.24361		14996	b0871	0.00545625	0.032595
14997	b0872	0.175799	0.538003		14997	b0872	0.451377	0.538003		14997	b0872	0.392762	0.890936
14998	b0873	-0.049921	-0.326819		14998	b0873	-0.029084	-0.326819		14998	b0873	-0.0152863	-0.0934239
14999	b0874	-0.072201	-0.394268		14999	b0874	-0.181754	-0.394268		14999	b0874	0.0170819	0.0866468
15000	b0875	-0.0459926	-0.237143		15000	b0875	0.308252	-0.237143		15000	b0875	0.0836128	0.421247
15001	b0876	-0.351738	-1.32705		15001	b0876	-0.157068	-1.32705		15001	b0876	-0.433842	-2.05874
15002	b0877	-0.0130097	-0.0702716		15002	b0877	-0.114692	-0.0702716		15002	b0877	-0.273868	-1.6328
15003	b0878	-0.249389	-1.00724		15003	b0878	-0.082719	-1.00724		15003	b0878	-0.0796083	-0.273867
15004	b0879	-0.0828945	-0.431132		15004	b0879	-0.226092	-0.431132		15004	b0879	-0.00973502	-0.05206
15007	b0882	-0.584128	-2.96541		15007	b0882	-0.313651	-2.96541		15007	b0882	-0.36903	-1.51069
15009	b0885	-0.00618441	-0.018342		15009	b0885	-0.170621	-0.018342		15009	b0885	0.0978451	0.285826
15016	b0892	0.0556113	0.314915		15016	b0892	0.0595226	0.314915		15016	b0892	0.0245507	0.159158
15018	b0894	-0.00267234	-0.0163485		15018	b0894	-0.105788	-0.0163485		15018	b0894	-0.0229219	-0.139902
15019	b0895	-0.0404033	-0.146896		15019	b0895	-0.15952	-0.146896		15019	b0895	0.287991	1.22912
15020	b0896	0.0722677	0.341183		15020	b0896	0.224125	0.341183		15020	b0896	0.184181	1.0319
15021	b0897	-0.344332	-1.04766		15021	b0897	-0.268652	-1.04766		15021	b0897	-0.316063	-1.00736
15022	b0898	0.194071	1.08661		15022	b0898	0.298289	1.08661		15022	b0898	0.25284	1.37164
15023	b0899	-0.0979289	-0.675769		15023	b0899	-0.183304	-0.675769		15023	b0899	-0.225065	-1.54416
15024	b0900	0.0760899	0.426858		15024	b0900	0.0368831	0.426858		15024	b0900	0.0265569	0.138261
15025	b0901	-0.265658	-1.54609		15025	b0901	-0.0603403	-1.54609		15025	b0901	-0.0184093	-0.116976
15026	b0902	-0.133309	-0.508632		15026	b0902	-0.204925	-0.508632		15026	b0902	-0.402478	-1.4484
15027	b0903	0.00741361	0.0474882		15027	b0903	-0.0739694	0.0474882		15027	b0903	-0.00547485	-0.0357424
15028	b0904	0.180561	0.729289		15028	b0904	0.317402	0.729289		15028	b0904	0.100745	0.518012
15029	b0905	-0.212244	-1.19986		15029	b0905	-0.137868	-1.19986		15029	b0905	-0.000122222	-0.000797667
15030	b0906	0.037056	0.185133		15030	b0906	0.237148	0.185133		15030	b0906	0.0956752	0.53048
15031	b0907	-1.42597	-4.27962		15031	b0907	-1.56509	-4.27962		15031	b0907	-2.53509	-5.98641
15032	b0908	-0.83858	-1.80813		15032	b0908	-0.451474	-1.80813		15032	b0908	-0.880238	-2.08853
15033	b0909	0.257009	1.24186		15033	b0909	0.136148	1.24186		15033	b0909	0.198683	0.874747
15037	b0913	0.021955	0.145771		15037	b0913	0.155057	0.145771		15037	b0913	0.116317	0.895185
15040	b0916	0.096666	0.437165		15040	b0916	0.302018	0.437165		15040	b0916	0.187563	0.893021
15043	b0919	0.0960547	0.511882		15043	b0919	0.0912435	0.511882		15043	b0919	0.153305	0.800754
15044	b0920	-0.416541	-1.36538		15044	b0920	-0.346783	-1.36538		15044	b0920	-0.534833	-2.38847
15045	b0921	-0.11397	-0.432433		15045	b0921	0.110219	-0.432433		15045	b0921	0.272822	1.11167
15049	b0925	-0.0545847	-0.278569		15049	b0925	0.0168256	-0.278569		15049	b0925	-0.196872	-0.971847
15050	b0926	0.167772	0.51383		15050	b0926	-0.271931	0.51383		15050	b0926	0.180529	0.668345
15051	b0927	-0.766123	-1.49263		15051	b0927	-0.463676	-1.49263		15051	b0927	-0.187619	-0.464296
15052	b0928	-0.470488	-1.67489		15052	b0928	-0.539441	-1.67489		15052	b0928	-1.20135	-3.85097
15053	b0929	-0.291159	-1.47701		15053	b0929	-0.570934	-1.47701		15053	b0929	-0.39482	-1.87824
15055	b0931	-0.00295617	-0.00792031		15055	b0931	0.206456	-0.00792031		15055	b0931	0.169285	0.656848
15056	b0932	-0.179377	-1.13969		15056	b0932	-0.087135	-1.13969		15056	b0932	-0.143194	-0.82128
15057	b0933	-0.245644	-0.875348		15057	b0933	-0.236302	-0.875348		15057	b0933	-0.125307	-0.418329
15058	b0934	-0.2428	-0.58418		15058	b0934	0.587525	-0.58418		15058	b0934	-0.360452	-0.789935
15059	b0935	-0.209019	-0.832105		15059	b0935	-0.198369	-0.832105		15059	b0935	-0.306473	-1.16647
15060	b0936	-0.0866099	-0.424281		15060	b0936	-0.208826	-0.424281		15060	b0936	0.107098	0.512058
15062	b0938	-0.0617234	-0.23739		15062	b0938	0.234969	-0.23739		15062	b0938	0.124766	0.29811
15063	b0939	-0.255645	-1.5499		15063	b0939	-0.598191	-1.5499		15063	b0939	-0.404569	-1.98745
15064	b0940	-0.0029488	-0.0201373		15064	b0940	0.0567259	-0.0201373		15064	b0940	-0.130413	-0.795857
15065	b0941	0.0878546	0.507009		15065	b0941	0.0371581	0.507009		15065	b0941	0.0308363	0.180991
15066	b0942	-0.282782	-0.962915		15066	b0942	-0.108252	-0.962915		15066	b0942	-0.155638	-0.574705
15067	b0943	-0.167037	-0.548429		15067	b0943	-0.229109	-0.548429		15067	b0943	0.0265213	0.0717304
15068	b0944	-0.0708078	-0.330576		15068	b0944	0.0908864	-0.330576		15068	b0944	-0.102808	-0.515781
15069	b0945	-0.170843	-0.735514		15069	b0945	-0.279432	-0.735514		15069	b0945	-0.481152	-2.14726
15070	b0946	0.246446	0.600089		15070	b0946	-0.261407	0.600089		15070	b0946	-0.106661	-0.362859
15071	b0947	0.225161	1.09291		15071	b0947	0.158919	1.09291		15071	b0947	-0.0417415	-0.202528
15072	b0948	0.240257	1.35568		15072	b0948	-0.208117	1.35568		15072	b0948	-0.233519	-1.08656
15073	b0949	-0.218393	-0.914787		15073	b0949	-0.486492	-0.914787		15073	b0949	-0.12592	-0.553957
15074	b0950	0.334529	1.50174		15074	b0950	0.0458141	1.50174		15074	b0950	0.204848	0.936766
15075	b0951	0.0234689	0.136506		15075	b0951	-0.201468	0.136506		15075	b0951	-0.140599	-0.838406
15076	b0952	0.137812	0.72908		15076	b0952	0.40364	0.72908		15076	b0952	0.125933	0.675428
15077	b0953	-0.334969	-0.769883		15077	b0953	0.0660249	-0.769883		15077	b0953	0.327304	0.850487
15079	b0955	0.194863	1.22741		15079	b0955	0.108259	1.22741		15079	b0955	0.09498	0.554994
15082	b0958	0.126586	0.487335		15082	b0958	0.169419	0.487335		15082	b0958	0.40958	2.27684
15083	b0959	-0.176837	-0.827337		15083	b0959	-0.258721	-0.827337		15083	b0959	-0.00889062	-0.0419536
15084	b0960	0.0211691	0.142175		15084	b0960	0.161605	0.142175		15084	b0960	0.194662	1.40613
15085	b0961	0.41238	1.12564		15085	b0961	-0.0810783	1.12564		15085	b0961	0.233224	0.583663
15086	b0962	0.205317	0.80446		15086	b0962	-0.146276	0.80446		15086	b0962	-0.326832	-1.33821
15087	b0963	0.115019	0.651156		15087	b0963	0.148073	0.651156		15087	b0963	0.153719	0.764626
15088	b0964	-0.00227962	-0.00699158		15088	b0964	0.100682	-0.00699158		15088	b0964	-0.301214	-1.01817
15089	b0965	-0.302647	-0.406261		15089	b0965	-0.987091	-0.406261		15089	b0965	-0.261874	-0.352634
15090	b0966	0.0421522	0.201685		15090	b0966	-0.207177	0.201685		15090	b0966	0.0636557	0.319293
15091	b0967	0.229721	1.014		15091	b0967	0.373072	1.014		15091	b0967	0.20383	1.10113
15092	b0968	0.0196224	0.0575095		15092	b0968	-0.31258	0.0575095		15092	b0968	0.0407118	0.0890531
15094	b0970	-0.415165	-1.23276		15094	b0970	-0.524025	-1.23276		15094	b0970	0.00997941	0.0281004
15095	b0972	0.267192	1.32062		15095	b0972	-0.0381545	1.32062		15095	b0972	-0.0109514	-0.0525998
15096	b0973	0.0764539	0.414065		15096	b0973	-0.0134952	0.414065		15096	b0973	0.0207444	0.105056
15097	b0974	0.456209	1.72225		15097	b0974	-0.576232	1.72225		15097	b0974	0.0144846	0.0531506
15098	b0975	-0.27695	-1.10142		15098	b0975	-0.466626	-1.10142		15098	b0975	-0.178202	-0.68718
15099	b0976	0.718831	2.00873		15099	b0976	0.161876	2.00873		15099	b0976	-0.639619	-1.72069
15100	b0977	0.342013	1.21223		15100	b0977	-0.0130684	1.21223		15100	b0977	0.198016	0.446304
15101	b0978	0.0807948	0.502704		15101	b0978	0.211709	0.502704		15101	b0978	-0.060096	-0.320708
15102	b0979	0.54371	2.32821		15102	b0979	-0.202781	2.32821		15102	b0979	-0.07523	-0.170904
15104	b0980	0.429463	1.8964		15104	b0980	0.314125	1.8964		15104	b0980	0.145166	0.679594
15105	b0981	-0.125904	-0.687007		15105	b0981	-0.117327	-0.687007		15105	b0981	-0.410831	-2.23474
15106	b0982	0.368554	1.54955		15106	b0982	0.247764	1.54955		15106	b0982	0.185562	0.639853
15107	b0983	-0.116684	-0.492865		15107	b0983	-0.117608	-0.492865		15107	b0983	-0.048598	-0.21969
15108	b0984	0.196354	1.30908		15108	b0984	0.117558	1.30908		15108	b0984	-0.0962058	-0.611059
15109	b0985	0.174074	0.790969		15109	b0985	-0.0955216	0.790969		15109	b0985	-0.18496	-0.810039
15110	b0986	0.112965	0.61799		15110	b0986	0.147733	0.61799		15110	b0986	-0.148611	-0.958947
15111	b0987	0.449297	1.93567		15111	b0987	0.404132	1.93567		15111	b0987	0.125786	0.55281
15115	b0991	-0.247765	-0.972876		15115	b0991	-0.803997	-0.972876		15115	b0991	-0.148987	-0.5154
15116	b0992	0.551177	2.52551		15116	b0992	0.446255	2.52551		15116	b0992	0.273913	1.26007
15117	b0993	0.11655	0.786614		15117	b0993	0.189264	0.786614		15117	b0993	-0.0401154	-0.26614
15118	b0994	-0.366586	-1.92058		15118	b0994	-0.492228	-1.92058		15118	b0994	-0.289008	-1.4873
15119	b0995	-0.334311	-0.820529		15119	b0995	-0.2285	-0.820529		15119	b0995	-0.0478331	-0.109164
15120	b0996	0.0681044	0.393513		15120	b0996	-0.0927472	0.393513		15120	b0996	0.0865835	0.472007
15121	b0997	0.151569	0.784165		15121	b0997	0.101182	0.784165		15121	b0997	-0.0467595	-0.227481
15123	b0999	0.0597723	0.198518		15123	b0999	-0.0271058	0.198518		15123	b0999	-0.14652	-0.577406
15124	b1000	-0.268956	-0.686517		15124	b1000	0.0127126	-0.686517		15124	b1000	-0.16824	-0.619701
15126	b1002	0.228643	1.17559		15126	b1002	-0.0229923	1.17559		15126	b1002	-0.198073	-1.05347
15128	b1004	-0.0541233	-0.264937		15128	b1004	-0.387585	-0.264937		15128	b1004	0.174116	0.746888
15130	b1006	0.148959	0.430641		15130	b1006	0.162147	0.430641		15130	b1006	0.0721577	0.191766
15132	b1008	0.154293	0.351806		15132	b1008	-0.11301	0.351806		15132	b1008	-0.374627	-0.744774
15133	b1009	0.0900358	0.264178		15133	b1009	0.106468	0.264178		15133	b1009	0.131868	0.362372
15134	b1010	-0.120723	-0.370082		15134	b1010	0.118045	-0.370082		15134	b1010	0.0816653	0.271116
15135	b1011	0.295855	0.576995		15135	b1011	0.194408	0.576995		15135	b1011	0.171913	0.475104
15136	b1012	0.503325	1.79414		15136	b1012	0.706433	1.79414		15136	b1012	0.199127	0.55679
15137	b1013	-1.1005	-2.78302		15137	b1013	-0.885967	-2.78302		15137	b1013	-0.287341	-0.814405
15138	b1014	-0.21547	-1.63495		15138	b1014	-0.427496	-1.63495		15138	b1014	-0.419465	-2.92902
15139	b1015	0.183948	0.983714		15139	b1015	0.22093	0.983714		15139	b1015	0.035817	0.216477
15141	b1018	0.35521	1.84756		15141	b1018	0.199922	1.84756		15141	b1018	0.367718	1.72467
15142	b1019	0.724058	3.04769		15142	b1019	0.572577	3.04769		15142	b1019	0.406746	1.42058
15143	b1020	-0.0900858	-0.424958		15143	b1020	0.104841	-0.424958		15143	b1020	0.220316	0.951216
15144	b1021	-0.659	-1.77425		15144	b1021	-0.187794	-1.77425		15144	b1021	-0.566729	-1.64598
15145	b1022	-0.270596	-1.57413		15145	b1022	-0.43159	-1.57413		15145	b1022	-0.432302	-2.66621
15146	b1023	-0.273851	-1.1287		15146	b1023	-0.136416	-1.1287		15146	b1023	-0.43424	-1.93738
15147	b1024	-0.0856406	-0.63844		15147	b1024	-0.00631042	-0.63844		15147	b1024	-0.133398	-1.00358
15152	b1029	0.312179	0.765985		15152	b1029	0.0685325	0.765985		15152	b1029	0.107736	0.286142
15155	b1033	-0.0729311	-0.361145		15155	b1033	-0.0652021	-0.361145		15155	b1033	-0.208499	-0.946595
15156	b1034	0.320189	1.2402		15156	b1034	-0.177835	1.2402		15156	b1034	-0.0080343	-0.0286884
15157	b1035	0.436122	1.49299		15157	b1035	0.189036	1.49299		15157	b1035	0.426975	1.5159
15158	b1036	0.0850476	0.543451		15158	b1036	0.0763354	0.543451		15158	b1036	-0.0495565	-0.277924
15159	b1037	0.280712	1.65518		15159	b1037	-0.0124966	1.65518		15159	b1037	0.0758805	0.425935
15160	b1038	-1.51354	-3.05014		15160	b1038	-0.464528	-3.05014		15160	b1038	0.0142381	0.0410377
15161	b1039	0.00409242	0.0161936		15161	b1039	-0.232871	0.0161936		15161	b1039	-0.165774	-0.731835
15163	b1041	0.0537912	0.255898		15163	b1041	-0.074563	0.255898		15163	b1041	-0.284405	-1.06698
15164	b1042	0.114445	0.482334		15164	b1042	0.0505896	0.482334		15164	b1042	0.0828881	0.28831
15165	b1043	0.110595	0.584052		15165	b1043	0.0346235	0.584052		15165	b1043	-0.0851024	-0.467626
15166	b1044	-0.440091	-1.72516		15166	b1044	-0.496998	-1.72516		15166	b1044	-0.427727	-1.52518
15167	b1045	0.0623721	0.249291		15167	b1045	0.199435	0.249291		15167	b1045	0.0195472	0.0868737
15168	b1046	0.16177	0.753554		15168	b1046	0.131209	0.753554		15168	b1046	-0.00196369	-0.00941303
15169	b1047	-0.184018	-1.04428		15169	b1047	-0.104748	-1.04428		15169	b1047	-0.318241	-1.58433
15170	b1048	-0.0131161	-0.0440161		15170	b1048	0.229115	-0.0440161		15170	b1048	-0.0444076	-0.128394
15171	b1049	-0.289675	-1.0637		15171	b1049	-0.255655	-1.0637		15171	b1049	-0.175266	-0.877243
15175	b1053	-0.300977	-1.3855		15175	b1053	-0.211189	-1.3855		15175	b1053	-0.187919	-0.740136
15177	b1055	-0.184376	-0.782752		15177	b1055	-0.238146	-0.782752		15177	b1055	-0.0461446	-0.191796
15178	b1056	0.426735	2.69855		15178	b1056	0.32346	2.69855		15178	b1056	0.324729	1.94003
15179	b1057	-0.178191	-0.643591		15179	b1057	0.136796	-0.643591		15179	b1057	-0.0238238	-0.0932898
15181	b1059	0.0596909	0.401734		15181	b1059	0.388727	0.401734		15181	b1059	-0.00215899	-0.0149077
15182	b1060	-0.808568	-2.30015		15182	b1060	-0.175965	-2.30015		15182	b1060	-0.245928	-0.731588
15183	b1061	0.30795	1.37872		15183	b1061	-0.197981	1.37872		15183	b1061	-0.0713324	-0.374919
15184	b1062	0.0492363	0.204181		15184	b1062	0.129527	0.204181		15184	b1062	-0.470265	-1.64524
15186	b1064	-0.0239893	-0.0521993		15186	b1064	0.302614	-0.0521993		15186	b1064	0.440476	1.04352
15187	b1065	-0.127334	-0.498456		15187	b1065	-0.142836	-0.498456		15187	b1065	-0.102093	-0.39625
15188	b1066	0.315219	1.60279		15188	b1066	0.128282	1.60279		15188	b1066	-0.266744	-1.30533
15189	b1067	0.303341	0.98084		15189	b1067	0.0676985	0.98084		15189	b1067	-0.374066	-1.06136
15190	b1068	0.286631	1.37257		15190	b1068	0.102435	1.37257		15190	b1068	-0.00943909	-0.0466803
15194	b1072	-0.713903	-3.11067		15194	b1072	0.255715	-3.11067		15194	b1072	-0.0551671	-0.177984
15195	b1073	0.153047	0.679293		15195	b1073	0.262598	0.679293		15195	b1073	0.44996	1.55306
15197	b1075	0.254546	0.535202		15197	b1075	0.167938	0.535202		15197	b1075	0.407119	0.993012
15198	b1076	-0.42659	-2.29109		15198	b1076	-0.294155	-2.29109		15198	b1076	-0.174825	-0.896579
15199	b1077	-0.11086	-0.494319		15199	b1077	-0.173192	-0.494319		15199	b1077	0.135312	0.64516
15200	b1078	-0.220172	-1.21878		15200	b1078	-0.190392	-1.21878		15200	b1078	-0.186267	-0.973427
15201	b1079	0.219517	0.630036		15201	b1079	0.393544	0.630036		15201	b1079	0.0885074	0.229974
15202	b1080	-0.26791	-1.11032		15202	b1080	-0.0196537	-1.11032		15202	b1080	-0.136422	-0.567382
15203	b1081	-0.170694	-0.94681		15203	b1081	-0.025673	-0.94681		15203	b1081	-0.350354	-1.75534
15204	b1082	-0.182767	-0.655188		15204	b1082	-0.249477	-0.655188		15204	b1082	-0.0312485	-0.137733
15205	b1083	0.301314	0.939691		15205	b1083	-0.105464	0.939691		15205	b1083	0.160256	0.469113
15208	b1086	-0.267058	-0.974806		15208	b1086	-0.0905911	-0.974806		15208	b1086	-0.216976	-0.662224
15209	b1087	-0.161848	-0.688013		15209	b1087	-0.0767013	-0.688013		15209	b1087	-0.158684	-0.783374
15210	b1088	-0.516879	-1.65201		15210	b1088	-0.583768	-1.65201		15210	b1088	-0.234802	-0.778657
15212	b1090	0.0393185	0.128636		15212	b1090	0.405495	0.128636		15212	b1090	0.596546	2.15207
15217	b1095	0.152128	0.722818		15217	b1095	0.0244844	0.722818		15217	b1095	0.528302	2.4947
15218	b1096	0.124757	0.43994		15218	b1096	0.361047	0.43994		15218	b1096	-0.0433746	-0.118222
15219	b1097	-0.158294	-0.697		15219	b1097	0.0423062	-0.697		15219	b1097	-0.138558	-0.573825
15222	b1100	-0.346544	-1.92717		15222	b1100	-0.539907	-1.92717		15222	b1100	-0.0874008	-0.436346
15223	b1101	-0.167091	-1.17017		15223	b1101	-0.0700828	-1.17017		15223	b1101	-0.17579	-1.13778
15224	b1102	-0.140916	-0.813574		15224	b1102	-0.0686636	-0.813574		15224	b1102	-0.044744	-0.254143
15227	b1105	-0.348058	-0.850969		15227	b1105	-0.00324395	-0.850969		15227	b1105	-0.60749	-1.14895
15228	b1106	-0.397922	-1.63537		15228	b1106	-0.36659	-1.63537		15228	b1106	-0.67537	-2.36088
15231	b1109	-1.16709	-3.3841		15231	b1109	-0.60485	-3.3841		15231	b1109	-0.216463	-0.766806
15232	b1110	0.135221	0.758773		15232	b1110	0.332689	0.758773		15232	b1110	0.245858	1.27062
15233	b1111	-0.529581	-1.29648		15233	b1111	-0.544722	-1.29648		15233	b1111	0.0284457	0.058106
15235	b1113	-0.404659	-1.5386		15235	b1113	-0.235396	-1.5386		15235	b1113	-0.21638	-0.960661
15236	b1114	-0.186719	-0.909117		15236	b1114	0.0275439	-0.909117		15236	b1114	0.155846	0.919765
15237	b1115	-0.211935	-1.19928		15237	b1115	-0.118978	-1.19928		15237	b1115	-0.264565	-1.24487
15241	b1119	-0.0921737	-0.29889		15241	b1119	-0.121026	-0.29889		15241	b1119	0.214039	0.723965
15242	b1120	-0.0831189	-0.319959		15242	b1120	-0.202741	-0.319959		15242	b1120	0.277496	1.157
15244	b1122	0.350874	1.72449		15244	b1122	0.168095	1.72449		15244	b1122	0.379111	2.03367
15245	b1123	-0.0146853	-0.0515812		15245	b1123	-0.452984	-0.0515812		15245	b1123	-0.194032	-0.705405
15246	b1124	-0.00186948	-0.00536714		15246	b1124	-0.0962118	-0.00536714		15246	b1124	0.0970985	0.244915
15247	b1125	0.0718028	0.204694		15247	b1125	-0.215869	0.204694		15247	b1125	0.0374801	0.108675
15248	b1126	0.208854	0.632924		15248	b1126	0.15908	0.632924		15248	b1126	0.375394	1.47547
15249	b1127	-0.14254	-0.551916		15249	b1127	-0.0067437	-0.551916		15249	b1127	0.0421867	0.224524
15250	b1128	0.00964937	0.0538657		15250	b1128	-0.164253	0.0538657		15250	b1128	0.0626269	0.299591
15254	b1132	-0.467738	-1.48678		15254	b1132	-0.306444	-1.48678		15254	b1132	-0.381124	-1.03615
15257	b1135	0.0130406	0.0590585		15257	b1135	0.23061	0.0590585		15257	b1135	0.142437	0.562966
15261	b1139	-0.449665	-1.32739		15261	b1139	-0.209647	-1.32739		15261	b1139	-0.752798	-1.82645
15262	b1140	0.196334	1.08258		15262	b1140	0.142926	1.08258		15262	b1140	0.344489	2.08947
15263	b1141	-0.0250599	-0.0484986		15263	b1141	0.115576	-0.0484986		15263	b1141	0.220935	0.655094
15269	b1147	0.0138769	0.0255532		15269	b1147	0.163051	0.0255532		15269	b1147	-0.139445	-0.295213
15273	b1151	-0.174839	-0.318842		15273	b1151	-0.279812	-0.318842		15273	b1151	-0.305865	-0.594176
15274	b1152	-0.373174	-0.982525		15274	b1152	-0.573166	-0.982525		15274	b1152	-0.0676556	-0.178148
15275	b1153	-0.0572419	-0.23328		15275	b1153	-0.00211606	-0.23328		15275	b1153	0.474185	0.994147
15276	b1154	-0.0300333	-0.163432		15276	b1154	0.146398	-0.163432		15276	b1154	-0.028677	-0.144003
15277	b1155	0.140457	0.428282		15277	b1155	0.487503	0.428282		15277	b1155	0.503864	1.24818
15278	b1156	-0.327988	-1.20106		15278	b1156	0.110975	-1.20106		15278	b1156	0.0734004	0.288229
15280	b1158	0.119697	0.512966		15280	b1158	-0.358086	0.512966		15280	b1158	-0.0406594	-0.173287
15284	b1162	-0.326746	-1.13877		15284	b1162	-0.688291	-1.13877		15284	b1162	-0.195834	-0.784798
15285	b1163	-0.279677	-1.07151		15285	b1163	-0.359122	-1.07151		15285	b1163	-0.40827	-1.37675
15294	b1172	-0.100439	-0.235326		15294	b1172	0.165491	-0.235326		15294	b1172	0.706972	2.47006
15297	b1175	-0.942918	-1.82023		15297	b1175	-0.845947	-1.82023		15297	b1175	-0.592301	-1.40324
15299	b1177	0.0671289	0.252641		15299	b1177	-0.0111771	0.252641		15299	b1177	0.474895	1.92183
15300	b1178	-0.0962803	-0.44981		15300	b1178	0.248067	-0.44981		15300	b1178	0.338476	1.55689
15302	b1180	-0.2708	-1.058		15302	b1180	0.23628	-1.058		15302	b1180	-0.252086	-0.700212
15303	b1181	-0.531921	-2.29985		15303	b1181	-0.27624	-2.29985		15303	b1181	-0.333598	-1.51939
15306	b1184	-0.0534436	-0.241102		15306	b1184	0.105951	-0.241102		15306	b1184	0.0850882	0.372082
15308	b1186	0.433768	1.59346		15308	b1186	0.434926	1.59346		15308	b1186	0.601718	1.73555
15309	b1187	-0.560369	-1.96214		15309	b1187	-0.224305	-1.96214		15309	b1187	-0.461356	-1.11624
15310	b1188	0.0996257	0.460298		15310	b1188	0.0343841	0.460298		15310	b1188	0.000239841	0.00101206
15311	b1189	0.0996139	0.494024		15311	b1189	0.0861837	0.494024		15311	b1189	0.134013	0.594658
15312	b1190	-0.0570102	-0.198179		15312	b1190	0.259019	-0.198179		15312	b1190	0.154174	0.540061
15313	b1191	-0.142718	-0.810977		15313	b1191	-0.118387	-0.810977		15313	b1191	-0.0240346	-0.145303
15314	b1192	-1.64523	-2.64778		15314	b1192	-4.89881	-2.64778		15314	b1192	-3.93441	-5.54328
15316	b1194	-0.659577	-1.69683		15316	b1194	-0.181739	-1.69683		15316	b1194	0.209312	0.785371
15317	b1195	0.180855	0.578968		15317	b1195	-0.21187	0.578968		15317	b1195	-0.004947	-0.00886176
15319	b1197	0.190319	1.00234		15319	b1197	0.267954	1.00234		15319	b1197	0.176316	1.05166
15320	b1198	0.20621	0.530541		15320	b1198	-0.383601	0.530541		15320	b1198	0.0266218	0.0910013
15321	b1199	-0.280767	-0.837813		15321	b1199	0.0272939	-0.837813		15321	b1199	-0.400794	-1.02256
15322	b1200	-0.0191513	-0.0759835		15322	b1200	0.416759	-0.0759835		15322	b1200	0.0161871	0.0582219
15323	b1201	-0.525509	-2.35726		15323	b1201	-0.0823509	-2.35726		15323	b1201	-0.0871233	-0.414771
15324	b1202	-0.0591547	-0.384583		15324	b1202	0.084916	-0.384583		15324	b1202	0.20126	1.28111
15328	b1206	0.170901	0.939563		15328	b1206	0.2414	0.939563		15328	b1206	0.100868	0.568749
15335	b1213	-0.308858	-0.998934		15335	b1213	0.424782	-0.998934		15335	b1213	0.166662	0.545841
15336	b1214	0.193857	0.654486		15336	b1214	-0.214019	0.654486		15336	b1214	-0.260137	-0.642498
15338	b1216	0.0273776	0.169962		15338	b1216	0.169044	0.169962		15338	b1216	0.140483	0.778506
15340	b1218	0.281392	1.19117		15340	b1218	-0.0464117	1.19117		15340	b1218	-0.171454	-0.574305
15341	b1219	-0.368041	-0.813558		15341	b1219	-0.0723432	-0.813558		15341	b1219	0.0413639	0.0945152
15342	b1220	-0.48511	-1.79108		15342	b1220	-0.255304	-1.79108		15342	b1220	0.198782	0.928989
15343	b1221	-0.36986	-1.27482		15343	b1221	-0.0903451	-1.27482		15343	b1221	-0.228494	-0.886557
15344	b1222	-0.671265	-2.23975		15344	b1222	0.274553	-2.23975		15344	b1222	-0.0979805	-0.249332
15345	b1223	-0.765931	-2.52224		15345	b1223	0.102941	-2.52224		15345	b1223	-0.0366729	-0.125102
15346	b1224	-0.0189488	-0.103896		15346	b1224	-0.0418192	-0.103896		15346	b1224	0.0176458	0.0934805
15347	b1225	0.44297	2.06155		15347	b1225	0.605567	2.06155		15347	b1225	0.461416	1.73108
15348	b1226	-0.0618018	-0.219205		15348	b1226	-0.0663536	-0.219205		15348	b1226	0.0793917	0.249218
15349	b1227	0.129989	0.463031		15349	b1227	-0.27415	0.463031		15349	b1227	-0.0041223	-0.0123149
15352	b1232	-1.15133	-3.98325		15352	b1232	-0.520247	-3.98325		15352	b1232	-1.32287	-5.14375
15353	b1233	-0.83081	-3.13788		15353	b1233	-0.0210642	-3.13788		15353	b1233	0.193387	0.608812
15354	b1234	-0.367574	-1.4131		15354	b1234	-0.397511	-1.4131		15354	b1234	0.114089	0.452765
15358	b1238	-0.253267	-0.773294		15358	b1238	0.0328928	-0.773294		15358	b1238	-0.193463	-0.707401
15361	b1241	0.0035686	0.0248019		15361	b1241	0.0641313	0.0248019		15361	b1241	-0.0905957	-0.601909
15362	b1242	-0.106856	-0.391356		15362	b1242	-0.0331133	-0.391356		15362	b1242	0.0571839	0.143072
15363	b1243	0.0607945	0.251038		15363	b1243	-0.100172	0.251038		15363	b1243	0.0764032	0.407222
15364	b1244	0.00895862	0.0446553		15364	b1244	-0.00161712	0.0446553		15364	b1244	0.0227033	0.11163
15365	b1245	-0.00316068	-0.0137774		15365	b1245	0.00238536	-0.0137774		15365	b1245	-0.16352	-0.806864
15367	b1247	-0.0819814	-0.330838		15367	b1247	0.172914	-0.330838		15367	b1247	-0.149893	-0.699694
15369	b1249	-0.192129	-0.663892		15369	b1249	-0.223659	-0.663892		15369	b1249	-0.579386	-2.09342
15370	b1250	-0.189794	-0.577394		15370	b1250	0.284453	-0.577394		15370	b1250	-0.0912811	-0.337994
15371	b1251	-0.591491	-1.56812		15371	b1251	-0.109874	-1.56812		15371	b1251	-0.885385	-2.76083
15373	b1253	0.2207	0.511385		15373	b1253	-0.495029	0.511385		15373	b1253	0.3053	0.405061
15375	b1255	-0.375396	-1.203		15375	b1255	-0.712773	-1.203		15375	b1255	-0.362096	-1.4086
15376	b1256	-0.0819372	-0.441296		15376	b1256	-0.133868	-0.441296		15376	b1256	-0.225701	-1.20568
15380	b1260	-0.62659	-1.83503		15380	b1260	-0.583903	-1.83503		15380	b1260	-0.558364	-1.52807
15382	b1262	-0.249609	-1.27501		15382	b1262	-0.129347	-1.27501		15382	b1262	-0.404622	-1.83521
15383	b1263	-0.13044	-0.311799		15383	b1263	-0.202198	-0.311799		15383	b1263	0.0476334	0.0975444
15384	b1264	-0.0219893	-0.0957554		15384	b1264	0.0683096	-0.0957554		15384	b1264	-0.0225735	-0.0830493
15386	b1266	-0.628746	-1.74483		15386	b1266	-0.951293	-1.74483		15386	b1266	-0.569713	-1.52609
15388	b1268	-0.392156	-1.68353		15388	b1268	-0.329027	-1.68353		15388	b1268	-0.0306283	-0.140727
15389	b1269	-1.38383	-2.38826		15389	b1269	-0.92693	-2.38826		15389	b1269	-1.03507	-1.78753
15390	b1270	0.000981532	0.00210969		15390	b1270	-0.235027	0.00210969		15390	b1270	-0.216812	-0.438171
15391	b1271	0.327073	0.694215		15391	b1271	0.967434	0.694215		15391	b1271	0.330728	0.860139
15392	b1272	-0.265077	-1.46392		15392	b1272	-0.183806	-1.46392		15392	b1272	-0.421252	-2.17738
15396	b1276	-0.0760789	-0.3252		15396	b1276	-0.153014	-0.3252		15396	b1276	0.0378756	0.178583
15398	b1278	0.337581	0.523256		15398	b1278	0.239876	0.523256		15398	b1278	-0.269531	-0.302761
15402	b1282	0.147924	0.524806		15402	b1282	-0.50546	0.524806		15402	b1282	-0.397957	-1.54691
15403	b1283	-0.064058	-0.261222		15403	b1283	-0.0663257	-0.261222		15403	b1283	-0.124456	-0.566971
15404	b1284	0.653057	2.64895		15404	b1284	0.57919	2.64895		15404	b1284	0.725819	2.94613
15405	b1285	-0.282949	-0.981279		15405	b1285	-0.397045	-0.981279		15405	b1285	-0.195463	-0.740706
15407	b1287	0.165614	0.37066		15407	b1287	0.0559973	0.37066		15407	b1287	-0.215676	-0.373334
15409	b1289	-0.293477	-0.648104		15409	b1289	-0.661436	-0.648104		15409	b1289	-0.489971	-1.20335
15414	b1294	-0.187481	-0.87203		15414	b1294	-0.10706	-0.87203		15414	b1294	-0.0114745	-0.0416747
15416	b1296	-0.0219893	-0.091978		15416	b1296	-0.486828	-0.091978		15416	b1296	0.0810726	0.247448
15417	b1297	-0.179929	-0.586057		15417	b1297	0.0778601	-0.586057		15417	b1297	-0.266946	-1.05302
15418	b1298	0.553981	0.717253		15418	b1298	0.479807	0.717253		15418	b1298	0.582014	1.09982
15419	b1299	0.234832	0.516867		15419	b1299	0.960468	0.516867		15419	b1299	0.057999	0.170194
15420	b1300	-0.0736223	-0.24392		15420	b1300	-0.26289	-0.24392		15420	b1300	-0.132032	-0.511719
15421	b1301	0.179334	0.618337		15421	b1301	0.0742384	0.618337		15421	b1301	0.00617088	0.0251888
15422	b1302	0.00314187	0.00790361		15422	b1302	-0.562189	0.00790361		15422	b1302	-0.462888	-1.17464
15423	b1303	0.442227	1.45278		15423	b1303	0.397078	1.45278		15423	b1303	0.165476	0.546987
15424	b1304	-1.47014	-2.23451		15424	b1304	-1.17148	-2.23451		15424	b1304	-1.35472	-2.25825
15425	b1305	-0.498276	-0.62709		15425	b1305	-0.227692	-0.62709		15425	b1305	0.299283	0.580424
15426	b1306	-0.120859	-0.204993		15426	b1306	-0.682516	-0.204993		15426	b1306	-0.019084	-0.0510362
15428	b1308	-0.194855	-0.563393		15428	b1308	-0.215039	-0.563393		15428	b1308	-0.122502	-0.323787
15429	b1309	-0.892847	-1.68143		15429	b1309	-0.261602	-1.68143		15429	b1309	-0.599652	-1.18456
15430	b1310	-0.0397988	-0.137042		15430	b1310	-0.707213	-0.137042		15430	b1310	-0.258468	-1.17698
15431	b1311	-0.033499	-0.117116		15431	b1311	-0.0554488	-0.117116		15431	b1311	-0.0607222	-0.24584
15432	b1312	0.251872	1.39515		15432	b1312	-0.00539981	1.39515		15432	b1312	-0.0750887	-0.391267
15433	b1313	0.179616	0.575056		15433	b1313	-0.153655	0.575056		15433	b1313	0.050691	0.159471
15434	b1314	-0.0598203	-0.276643		15434	b1314	0.175245	-0.276643		15434	b1314	-0.213258	-0.695155
15435	b1315	0.107429	0.351466		15435	b1315	-0.36469	0.351466		15435	b1315	0.11849	0.371299
15436	b1316	0.144625	0.896277		15436	b1316	0.0432314	0.896277		15436	b1316	-0.00629093	-0.0377264
15437	b1317	0.57651	1.84529		15437	b1317	0.313606	1.84529		15437	b1317	0.0473565	0.115141
15439	b1319	-0.303191	-1.24833		15439	b1319	-0.277301	-1.24833		15439	b1319	-0.184667	-0.898813
15440	b1320	0.344374	1.35374		15440	b1320	-0.228581	1.35374		15440	b1320	0.0208458	0.0777294
15441	b1321	-0.0182792	-0.061588		15441	b1321	-0.326025	-0.061588		15441	b1321	-0.100444	-0.379135
15442	b1322	-0.164285	-0.573901		15442	b1322	0.0642801	-0.573901		15442	b1322	0.055984	0.209121
15443	b1323	-0.462826	-1.03866		15443	b1323	-0.612359	-1.03866		15443	b1323	-1.21371	-2.8193
15444	b1324	0.116121	0.359765		15444	b1324	0.619435	0.359765		15444	b1324	-0.0616974	-0.185598
15445	b1325	0.322923	1.03632		15445	b1325	-0.0649986	1.03632		15445	b1325	0.0381873	0.136362
15446	b1326	-0.331022	-0.978579		15446	b1326	-0.322355	-0.978579		15446	b1326	0.0491899	0.203052
15447	b1327	0.21891	0.941681		15447	b1327	0.0701558	0.941681		15447	b1327	0.228194	1.13776
15448	b1328	-0.0372344	-0.125537		15448	b1328	-0.0395462	-0.125537		15448	b1328	-0.0618754	-0.240703
15449	b1329	-0.0269265	-0.126597		15449	b1329	-0.17775	-0.126597		15449	b1329	0.0471828	0.241451
15450	b1330	-0.550361	-1.07436		15450	b1330	-0.359158	-1.07436		15450	b1330	-0.355889	-0.860602
15453	b1333	0.156729	0.285295		15453	b1333	0.168305	0.285295		15453	b1333	0.220659	0.329166
15456	b1336	0.287602	0.79874		15456	b1336	0.298536	0.79874		15456	b1336	0.108088	0.340732
15457	b1337	0.4652	1.42257		15457	b1337	-0.363393	1.42257		15457	b1337	0.140159	0.453131
15458	b1338	0.0442353	0.173514		15458	b1338	-0.405564	0.173514		15458	b1338	0.0818934	0.388797
15459	b1339	0.516287	2.16353		15459	b1339	0.34488	2.16353		15459	b1339	0.244833	0.80185
15461	b1341	0.306502	1.53843		15461	b1341	-0.201832	1.53843		15461	b1341	0.346551	1.85632
15462	b1342	-0.00349555	-0.0191661		15462	b1342	-0.105693	-0.0191661		15462	b1342	-0.0891428	-0.439605
15463	b1343	-0.00191069	-0.00485282		15463	b1343	-0.248142	-0.00485282		15463	b1343	0.123043	0.487723
15464	b1344	-0.182957	-0.374529		15464	b1344	0.375551	-0.374529		15464	b1344	-0.0907565	-0.285158
15465	b1345	0.34014	1.43467		15465	b1345	-0.00768323	1.43467		15465	b1345	0.0607183	0.237997
15469	b1349	0.473192	2.14238		15469	b1349	0.260401	2.14238		15469	b1349	0.164541	0.612753
15470	b1350	0.11578	0.465121		15470	b1350	0.342886	0.465121		15470	b1350	0.366487	1.49739
15474	b1353	-0.112687	-0.479257		15474	b1353	0.261522	-0.479257		15474	b1353	-0.229506	-0.848509
15476	b4527	0.76738	1.52276		15476	b4527	-0.347936	1.52276		15476	b4527	0.520954	1.68807
15477	b1355	0.260508	0.681117		15477	b1355	0.525692	0.681117		15477	b1355	0.568843	1.72584
15481	b1359	-0.156256	-0.348056		15481	b1359	-0.30267	-0.348056		15481	b1359	-0.0457067	-0.137351
15482	b1360	0.236362	0.470755		15482	b1360	0.596327	0.470755		15482	b1360	0.14943	0.385302
15487	b1365	0.504132	2.90969		15487	b1365	0.297301	2.90969		15487	b1365	0.398986	2.50417
15488	b1366	-0.088923	-0.314755		15488	b1366	-0.388087	-0.314755		15488	b1366	-0.438941	-1.40412
15494	b1372	0.467741	2.35428		15494	b1372	0.483555	2.35428		15494	b1372	0.607983	2.72092
15498	b1376	0.0598613	0.318418		15498	b1376	-0.0619551	0.318418		15498	b1376	-0.0683286	-0.31614
15499	b1377	0.324835	1.06913		15499	b1377	-0.0281291	1.06913		15499	b1377	0.0335311	0.0718307
15500	b1378	-0.0567458	-0.257972		15500	b1378	-0.464841	-0.257972		15500	b1378	-0.31353	-1.57451
15501	b1379	-0.185828	-0.451075		15501	b1379	0.22693	-0.451075		15501	b1379	-0.0105711	-0.0268995
15503	b1381	0.0708332	0.447834		15503	b1381	0.159203	0.447834		15503	b1381	0.0422276	0.223653
15504	b1382	-0.705784	-1.19416		15504	b1382	-1.04561	-1.19416		15504	b1382	-1.04862	-1.71903
15506	b1384	0.082008	0.308788		15506	b1384	-0.00718473	0.308788		15506	b1384	-0.0678552	-0.229826
15507	b1385	0.122497	0.510242		15507	b1385	0.53276	0.510242		15507	b1385	0.215112	1.00306
15508	b1386	-0.218835	-0.933613		15508	b1386	-0.0744188	-0.933613		15508	b1386	-0.178004	-1.05776
15509	b1387	0.403978	1.79874		15509	b1387	0.118577	1.79874		15509	b1387	0.2926	1.33927
15510	b1388	0.00582361	0.0244457		15510	b1388	0.0998284	0.0244457		15510	b1388	-0.247984	-0.595859
15512	b1390	-0.110436	-0.289815		15512	b1390	0.0757633	-0.289815		15512	b1390	-0.01164	-0.0205537
15514	b1392	0.214101	0.979865		15514	b1392	0.0873602	0.979865		15514	b1392	0.502564	1.70721
15516	b1394	-0.118814	-0.285367		15516	b1394	-0.719069	-0.285367		15516	b1394	-0.106585	-0.308762
15517	b1395	-0.117704	-0.577136		15517	b1395	-0.275681	-0.577136		15517	b1395	0.0122664	0.0594883
15518	b1396	0.628829	1.73033		15518	b1396	0.398974	1.73033		15518	b1396	0.422615	1.13813
15519	b1397	-0.134376	-0.625917		15519	b1397	-0.0275682	-0.625917		15519	b1397	0.0884467	0.482422
15521	b1399	0.182501	0.461984		15521	b1399	0.0433365	0.461984		15521	b1399	0.529761	1.38563
15522	b1400	-0.545773	-1.31334		15522	b1400	-0.100624	-1.31334		15522	b1400	-0.336967	-0.956012
15528	b1406	0.328507	1.4863		15528	b1406	0.218695	1.4863		15528	b1406	0.308978	1.20239
15529	b1407	-0.33294	-0.718486		15529	b1407	-0.38171	-0.718486		15529	b1407	0.037914	0.115846
15530	b1408	-0.466963	-1.16163		15530	b1408	0.114421	-1.16163		15530	b1408	-0.361457	-1.08133
15532	b1410	0.154187	0.486887		15532	b1410	-0.166394	0.486887		15532	b1410	0.0486128	0.137565
15533	b1411	-0.0981867	-0.452952		15533	b1411	0.0461055	-0.452952		15533	b1411	0.0562941	0.232696
15534	b1412	-0.309192	-0.567576		15534	b1412	0.10956	-0.567576		15534	b1412	0.027247	0.0496896
15535	b1413	-0.138571	-0.751688		15535	b1413	-0.0508346	-0.751688		15535	b1413	-0.0361603	-0.214447
15536	b1414	-0.231947	-0.840946		15536	b1414	-0.102013	-0.840946		15536	b1414	-0.0998071	-0.331189
15537	b1415	-0.0488682	-0.145911		15537	b1415	0.169061	-0.145911		15537	b1415	0.0158415	0.0473535
15539	b1418	-0.275479	-0.524175		15539	b1418	-0.546271	-0.524175		15539	b1418	-0.0927908	-0.185408
15540	b1419	0.0976741	0.393225		15540	b1419	-0.0547167	0.393225		15540	b1419	-0.178847	-0.725796
15542	b1421	0.240625	0.832149		15542	b1421	0.124265	0.832149		15542	b1421	-0.0377417	-0.116624
15543	b1422	0.0138974	0.0643355		15543	b1422	0.0717647	0.0643355		15543	b1422	-0.105772	-0.554042
15544	b1423	0.255523	0.763825		15544	b1423	0.210875	0.763825		15544	b1423	0.00410829	0.0127763
15545	b1424	-0.207981	-0.676053		15545	b1424	-0.778601	-0.676053		15545	b1424	-0.342561	-1.21481
15548	b1427	0.221972	0.439205		15548	b1427	0.00338371	0.439205		15548	b1427	0.297904	0.619414
15549	b1428	-0.244238	-1.10751		15549	b1428	-0.0235365	-1.10751		15549	b1428	0.30232	1.45628
15551	b1430	0.0486228	0.169255		15551	b1430	0.439279	0.169255		15551	b1430	0.371314	1.07491
15552	b1431	0.707702	1.51447		15552	b1431	0.74255	1.51447		15552	b1431	0.293598	0.530967
15553	b1432	-0.00125126	-0.00606047		15553	b1432	0.0582392	-0.00606047		15553	b1432	0.366353	1.46081
15554	b1433	0.0913538	0.347194		15554	b1433	0.157583	0.347194		15554	b1433	0.0448462	0.140531
15556	b1435	-0.195316	-0.983378		15556	b1435	-0.117056	-0.983378		15556	b1435	-0.0476182	-0.244613
15558	b4532	0.153489	0.425537		15558	b4532	0.790458	0.425537		15558	b4532	0.490569	1.30111
15560	b1439	-0.0583148	-0.209912		15560	b1439	0.0351996	-0.209912		15560	b1439	0.0158146	0.0716084
15561	b1440	-0.0861263	-0.431236		15561	b1440	-0.143952	-0.431236		15561	b1440	0.0662953	0.330144
15562	b1441	-0.417637	-2.08884		15562	b1441	-0.18616	-2.08884		15562	b1441	-0.105214	-0.471719
15563	b1442	0.182432	0.751631		15563	b1442	0.025964	0.751631		15563	b1442	0.269135	0.90962
15564	b1443	0.0687728	0.293404		15564	b1443	-0.24237	0.293404		15564	b1443	-0.0525186	-0.247384
15565	b1444	-0.0642237	-0.295526		15565	b1444	0.133138	-0.295526		15565	b1444	-0.171856	-0.820254
15570	b1449	0.122969	0.638888		15570	b1449	-0.239135	0.638888		15570	b1449	-0.203429	-0.809738
15571	b1450	-0.0228619	-0.067167		15571	b1450	-0.151581	-0.067167		15571	b1450	-0.273899	-1.15843
15572	b1451	0.168931	0.794079		15572	b1451	0.26378	0.794079		15572	b1451	0.334843	1.73664
15573	b1452	-0.198565	-0.647503		15573	b1452	-0.00973533	-0.647503		15573	b1452	0.046792	0.180132
15574	b1453	-0.036859	-0.119876		15574	b1453	0.138691	-0.119876		15574	b1453	-0.0135169	-0.0415588
15577	b1456	0.127927	0.432735		15577	b1456	0.129956	0.432735		15577	b1456	-0.0517869	-0.219626
15582	b1461	-0.473587	-1.11356		15582	b1461	0.160394	-1.11356		15582	b1461	-0.255147	-0.470495
15583	b1462	0.164762	0.317034		15583	b1462	0.114136	0.317034		15583	b1462	0.650988	1.27689
15584	b1463	-0.261956	-1.08024		15584	b1463	0.056503	-1.08024		15584	b1463	0.126914	0.463876
15585	b1464	-0.116618	-0.40149		15585	b1464	-0.184651	-0.40149		15585	b1464	-0.105172	-0.398435
15586	b1465	-0.711534	-1.30804		15586	b1465	-1.20323	-1.30804		15586	b1465	-0.395913	-0.784804
15587	b1466	0.470797	2.49443		15587	b1466	0.552603	2.49443		15587	b1466	0.382686	1.69808
15588	b1467	-0.225837	-0.898151		15588	b1467	-0.226938	-0.898151		15588	b1467	-0.0551244	-0.308599
15589	b1468	-0.0583498	-0.369011		15589	b1468	-0.216011	-0.369011		15589	b1468	-0.0334078	-0.176485
15590	b1469	0.0504681	0.178338		15590	b1469	0.0166632	0.178338		15590	b1469	0.00974808	0.0268106
15594	b1473	-0.000944052	-0.00462656		15594	b1473	0.0466229	-0.00462656		15594	b1473	-0.225589	-1.20254
15595	b1474	0.0888105	0.508258		15595	b1474	0.020748	0.508258		15595	b1474	0.00595294	0.0245679
15596	b1475	-0.00262773	-0.0143984		15596	b1475	-0.199021	-0.0143984		15596	b1475	-0.145232	-0.534455
15599	b1478	0.108633	0.339685		15599	b1478	0.537278	0.339685		15599	b1478	-0.175953	-0.391252
15600	b1479	0.258174	1.12381		15600	b1479	0.110318	1.12381		15600	b1479	-0.161905	-0.791145
15602	b1481	-0.102232	-0.249737		15602	b1481	0.209834	-0.249737		15602	b1481	0.0432855	0.124175
15604	b1483	-0.103842	-0.306695		15604	b1483	0.331754	-0.306695		15604	b1483	0.134725	0.461007
15605	b1484	0.225875	0.798975		15605	b1484	0.414113	0.798975		15605	b1484	0.582311	2.10984
15608	b1487	0.426055	1.13741		15608	b1487	0.590952	1.13741		15608	b1487	0.35083	0.984417
15609	b1488	0.576867	1.23075		15609	b1488	0.788473	1.23075		15609	b1488	0.657144	1.61362
15610	b1489	-0.346148	-1.10288		15610	b1489	0.095439	-1.10288		15610	b1489	-0.074301	-0.24323
15611	b1490	-0.173271	-0.387798		15611	b1490	-0.0893276	-0.387798		15611	b1490	-0.165404	-0.368622
15612	b1491	0.341202	1.39592		15612	b1491	0.258393	1.39592		15612	b1491	0.338768	1.3883
15613	b1492	0.303742	1.90371		15613	b1492	0.181562	1.90371		15613	b1492	0.0235837	0.114457
15615	b1494	0.272235	1.51087		15615	b1494	0.159791	1.51087		15615	b1494	0.210269	1.08174
15616	b1495	-0.0847705	-0.389748		15616	b1495	0.147672	-0.389748		15616	b1495	-0.146595	-0.69706
15617	b1496	-0.584666	-1.93177		15617	b1496	-0.605804	-1.93177		15617	b1496	-0.732843	-2.34634
15619	b1498	-0.445486	-1.18936		15619	b1498	-0.243065	-1.18936		15619	b1498	-0.662266	-2.1199
15622	b1501	0.271908	1.13613		15622	b1501	0.0793013	1.13613		15622	b1501	0.161795	0.718526
15625	b1504	0.583635	2.20965		15625	b1504	0.488373	2.20965		15625	b1504	0.185106	0.451112
15628	b1507	0.236422	0.788379		15628	b1507	0.3818	0.788379		15628	b1507	0.361108	1.27931
15632	b1511	0.1301	0.586291		15632	b1511	0.265131	0.586291		15632	b1511	0.0355946	0.177618
15633	b1512	0.397285	0.9464		15633	b1512	0.498377	0.9464		15633	b1512	0.468259	1.03699
15634	b1513	-0.180044	-0.437788		15634	b1513	-0.0478496	-0.437788		15634	b1513	0.105566	0.306441
15636	b1515	-0.23487	-0.916582		15636	b1515	-0.26874	-0.916582		15636	b1515	0.127545	0.395303
15637	b1516	0.388884	0.976112		15637	b1516	0.292977	0.976112		15637	b1516	0.0270644	0.0744881
15638	b1517	0.0248975	0.0994692		15638	b1517	0.0593343	0.0994692		15638	b1517	-0.056688	-0.260117
15639	b1518	-0.605498	-1.13396		15639	b1518	-0.905436	-1.13396		15639	b1518	-0.479306	-0.729007
15640	b1519	0.156335	0.403343		15640	b1519	0.313917	0.403343		15640	b1519	0.379308	1.27217
15641	b1520	-0.342063	-0.844414		15641	b1520	-0.598586	-0.844414		15641	b1520	0.0427376	0.0836348
15643	b1522	-0.220166	-0.712341		15643	b1522	-0.143841	-0.712341		15643	b1522	-0.119156	-0.344054
15646	b1525	0.0746046	0.258854		15646	b1525	0.0994777	0.258854		15646	b1525	0.0803255	0.293981
15647	b1526	0.376718	1.45873		15647	b1526	-0.045044	1.45873		15647	b1526	-0.0520535	-0.180503
15649	b1528	0.0312041	0.0913937		15649	b1528	0.0617565	0.0913937		15649	b1528	-0.25065	-0.775306
15655	b1534	0.0750069	0.348967		15655	b1534	-0.0107277	0.348967		15655	b1534	-0.191515	-0.714884
15656	b1535	0.0903064	0.28158		15656	b1535	-0.0639396	0.28158		15656	b1535	0.0816774	0.252701
15659	b1537	0.038851	0.140451		15659	b1537	-0.269463	0.140451		15659	b1537	-0.00308887	-0.0104928
15660	b1538	-0.0126455	-0.0463192		15660	b1538	-0.268046	-0.0463192		15660	b1538	0.0702923	0.326106
15661	b1539	-0.40004	-1.58502		15661	b1539	-0.420045	-1.58502		15661	b1539	-0.152002	-0.357544
15664	b1542	0.631171	1.67909		15664	b1542	0.455595	1.67909		15664	b1542	0.450403	0.993297
15669	b1547	0.19973	0.783793		15669	b1547	-0.404073	0.783793		15669	b1547	0.0382532	0.133997
15681	b1559	0.450776	2.35424		15681	b1559	0.348415	2.35424		15681	b1559	0.0837689	0.426511
15682	b1560	0.0123664	0.0370316		15682	b1560	-0.205231	0.0370316		15682	b1560	0.0295099	0.0920338
15684	b1562	0.181547	0.403316		15684	b1562	0.542142	0.403316		15684	b1562	0.304374	0.697258
15687	b1565	0.0532808	0.135663		15687	b1565	-0.113913	0.135663		15687	b1565	-0.569486	-1.76941
15688	b1566	-0.770294	-1.56712		15688	b1566	-0.561574	-1.56712		15688	b1566	-0.739675	-1.61822
15691	b1569	-0.229481	-0.862085		15691	b1569	-1.22075	-0.862085		15691	b1569	-0.163564	-0.447721
15698	b1577	0.134368	0.574371		15698	b1577	0.156325	0.574371		15698	b1577	0.0662572	0.201667
15701	b1580	-0.0142075	-0.0443458		15701	b1580	0.0880125	-0.0443458		15701	b1580	-0.0274895	-0.060941
15702	b1581	-0.208611	-0.556013		15702	b1581	-0.357276	-0.556013		15702	b1581	-0.294928	-0.789948
15703	b1582	-0.600504	-0.915133		15703	b1582	0.107339	-0.915133		15703	b1582	-0.0761012	-0.201119
15705	b1584	0.030119	0.156622		15705	b1584	0.128554	0.156622		15705	b1584	0.0114348	0.0565299
15706	b1585	0.0934799	0.283999		15706	b1585	0.0128535	0.283999		15706	b1585	-0.442051	-1.30308
15707	b1586	0.194175	0.64108		15707	b1586	0.423217	0.64108		15707	b1586	0.154744	0.735166
15708	b1587	-0.192906	-1.08683		15708	b1587	-0.110134	-1.08683		15708	b1587	-0.18229	-1.01202
15709	b1588	0.412659	1.15389		15709	b1588	0.11764	1.15389		15709	b1588	0.263752	0.750769
15710	b1589	-0.339826	-0.9564		15710	b1589	-0.381814	-0.9564		15710	b1589	-0.0761769	-0.221426
15711	b1590	0.0167593	0.0716284		15711	b1590	0.280178	0.0716284		15711	b1590	0.228893	0.730861
15713	b1592	0.118242	0.432879		15713	b1592	-0.0245398	0.432879		15713	b1592	0.0400308	0.14095
15714	b1593	0.135138	0.424387		15714	b1593	0.300745	0.424387		15714	b1593	0.280514	0.585646
15717	b1596	-0.0362059	-0.159276		15717	b1596	0.0437769	-0.159276		15717	b1596	-0.0225386	-0.102154
15718	b1597	-0.177999	-0.456662		15718	b1597	-0.0733194	-0.456662		15718	b1597	0.199978	0.696071
15719	b1598	0.416169	2.00638		15719	b1598	0.201233	2.00638		15719	b1598	0.150305	0.592706
15722	b1601	0.490358	2.09968		15722	b1601	0.225609	2.09968		15722	b1601	0.370014	1.5488
15723	b1602	0.630506	1.73044		15723	b1602	0.222452	1.73044		15723	b1602	0.361333	0.977916
15724	b1603	0.00459376	0.0165543		15724	b1603	-0.578222	0.0165543		15724	b1603	0.102367	0.225392
15725	b1604	-0.0971055	-0.344967		15725	b1604	-0.432572	-0.344967		15725	b1604	-0.108252	-0.580556
15726	b1605	0.22863	1.12587		15726	b1605	0.430517	1.12587		15726	b1605	0.130035	0.609394
15727	b1606	0.380337	1.71146		15727	b1606	0.383794	1.71146		15727	b1606	0.410147	2.01242
15729	b1608	-0.29064	-0.661303		15729	b1608	-0.631688	-0.661303		15729	b1608	0.405084	0.910656
15730	b1609	-0.0285094	-0.1058		15730	b1609	-0.545454	-0.1058		15730	b1609	-0.307767	-0.986922
15731	b1610	-0.248062	-0.846282		15731	b1610	-0.14724	-0.846282		15731	b1610	-0.14038	-0.587069
15732	b1611	-0.0993284	-0.416243		15732	b1611	-0.0445607	-0.416243		15732	b1611	-0.00420549	-0.0151923
15735	b1614	-0.256764	-0.707035		15735	b1614	0.0468347	-0.707035		15735	b1614	0.0328754	0.101651
15736	b1615	-0.230929	-0.713329		15736	b1615	0.0613266	-0.713329		15736	b1615	-0.12549	-0.404866
15737	b1616	0.159882	0.732262		15737	b1616	-0.194319	0.732262		15737	b1616	-0.0974469	-0.449286
15738	b1617	0.150989	0.747142		15738	b1617	0.0352311	0.747142		15738	b1617	-0.0305506	-0.138765
15739	b1618	-0.0943202	-0.348155		15739	b1618	-0.766915	-0.348155		15739	b1618	-0.979113	-2.63463
15740	b1619	0.0839182	0.330963		15740	b1619	-0.0865785	0.330963		15740	b1619	0.0127019	0.0462849
15742	b1621	-0.0450738	-0.211776		15742	b1621	-0.30628	-0.211776		15742	b1621	0.00399496	0.0100937
15743	b1622	-0.334235	-1.20148		15743	b1622	0.057969	-1.20148		15743	b1622	0.0960728	0.403738
15744	b1623	-0.0916875	-0.388638		15744	b1623	-0.0884162	-0.388638		15744	b1623	0.202872	0.901205
15745	b1624	-0.231021	-0.962885		15745	b1624	-0.332077	-0.962885		15745	b1624	-0.232084	-1.13027
15746	b1625	-0.413732	-1.57815		15746	b1625	-0.429332	-1.57815		15746	b1625	-0.148362	-0.538105
15747	b1626	-0.333951	-1.50266		15747	b1626	-0.26704	-1.50266		15747	b1626	-0.510676	-1.86628
15748	b1627	0.198083	0.688898		15748	b1627	0.328548	0.688898		15748	b1627	-0.339162	-0.922689
15749	b1628	0.387537	0.515901		15749	b1628	0.10746	0.515901		15749	b1628	0.263118	0.485778
15750	b1629	0.315982	1.30061		15750	b1629	0.11694	1.30061		15750	b1629	-0.0648388	-0.290586
15751	b1630	0.291757	1.1216		15751	b1630	0.0398053	1.1216		15751	b1630	-0.0044951	-0.0186733
15753	b1632	0.123703	0.481638		15753	b1632	0.223055	0.481638		15753	b1632	0.108815	0.44072
15754	b1633	-0.450532	-0.952343		15754	b1633	-0.0225565	-0.952343		15754	b1633	0.172878	0.485919
15755	b1634	0.0502963	0.149401		15755	b1634	-0.273338	0.149401		15755	b1634	-0.24817	-0.72164
15756	b1635	0.222799	0.723675		15756	b1635	0.206621	0.723675		15756	b1635	0.219807	0.780109
15757	b1636	0.115483	0.326819		15757	b1636	-0.253313	0.326819		15757	b1636	-0.130893	-0.412508
15760	b1639	-0.310637	-0.837964		15760	b1639	-0.0375989	-0.837964		15760	b1639	-0.455557	-0.999131
15761	b1640	-0.0473164	-0.146318		15761	b1640	0.209578	-0.146318		15761	b1640	-0.0914585	-0.282476
15764	b1643	-0.9611	-2.32446		15764	b1643	-0.367709	-2.32446		15764	b1643	-0.227922	-0.58575
15765	b1644	-0.53803	-1.84214		15765	b1644	0.231215	-1.84214		15765	b1644	-0.18087	-0.542523
15766	b1645	-0.166065	-0.9632		15766	b1645	-0.275921	-0.9632		15766	b1645	-0.281884	-1.46977
15771	b1650	0.0332087	0.137703		15771	b1650	-0.162473	0.137703		15771	b1650	-0.413112	-1.68655
15774	b1653	-0.1042	-0.637028		15774	b1653	0.122313	-0.637028		15774	b1653	0.17072	0.917268
15777	b1656	0.194397	0.438021		15777	b1656	-0.0146786	0.438021		15777	b1656	0.300917	0.603627
15778	b1657	-0.241456	-0.819941		15778	b1657	-0.0240244	-0.819941		15778	b1657	0.179732	0.637166
15779	b1658	-0.554492	-2.11108		15779	b1658	-0.718595	-2.11108		15779	b1658	-0.314914	-1.12584
15780	b1659	-0.0479738	-0.0986584		15780	b1659	0.171369	-0.0986584		15780	b1659	-0.0890308	-0.14344
15782	b1661	0.273377	1.45384		15782	b1661	0.494179	1.45384		15782	b1661	0.41704	2.02576
15785	b1664	-0.110402	-0.374915		15785	b1664	-0.151978	-0.374915		15785	b1664	-0.311366	-1.25395
15786	b1667	0.29926	0.608482		15786	b1667	0.455052	0.608482		15786	b1667	0.307776	0.635516
15787	b1668	0.0871459	0.285786		15787	b1668	-0.336892	0.285786		15787	b1668	-0.0906919	-0.355498
15788	b1669	-0.144242	-0.325839		15788	b1669	-0.493868	-0.325839		15788	b1669	0.0162653	0.0379323
15789	b1670	-0.0661133	-0.154646		15789	b1670	-0.136627	-0.154646		15789	b1670	-0.329241	-0.800652
15790	b1671	-0.367085	-0.535362		15790	b1671	-0.253575	-0.535362		15790	b1671	0.326994	0.55904
15791	b1672	-0.185083	-0.735696		15791	b1672	0.00299089	-0.735696		15791	b1672	0.109796	0.442282
15792	b1673	0.121542	0.349616		15792	b1673	0.350061	0.349616		15792	b1673	0.167374	0.529674
15793	b1674	-0.163623	-0.692383		15793	b1674	-0.0599155	-0.692383		15793	b1674	0.151495	0.601347
15794	b1675	-0.0501071	-0.105325		15794	b1675	0.127772	-0.105325		15794	b1675	0.0212164	0.0256737
15795	b1676	-0.714751	-1.99297		15795	b1676	-1.0479	-1.99297		15795	b1676	-0.83562	-2.60064
15797	b1678	-0.355469	-1.71161		15797	b1678	-0.450396	-1.71161		15797	b1678	-0.548703	-2.56565
15798	b1679	-0.199184	-0.414592		15798	b1679	-0.320825	-0.414592		15798	b1679	-0.134798	-0.457716
15799	b1680	-0.192908	-0.789075		15799	b1680	0.0281914	-0.789075		15799	b1680	-0.0376571	-0.177941
15800	b1681	-0.184606	-0.892357		15800	b1681	-0.268618	-0.892357		15800	b1681	-0.110894	-0.47529
15801	b1682	-0.459684	-2.21211		15801	b1682	-0.456425	-2.21211		15801	b1682	-0.405436	-1.39886
15802	b1683	-0.303096	-1.42919		15802	b1683	-0.423536	-1.42919		15802	b1683	-0.282776	-1.49762
15806	b1687	-0.302586	-1.61883		15806	b1687	-0.254941	-1.61883		15806	b1687	-0.38497	-1.79583
15807	b1688	-0.185501	-0.840302		15807	b1688	-0.203702	-0.840302		15807	b1688	-0.418909	-1.63016
15812	b1693	-0.649246	-2.70555		15812	b1693	-0.529254	-2.70555		15812	b1693	-1.32643	-4.43172
15813	b1694	0.0913431	0.333128		15813	b1694	0.216169	0.333128		15813	b1694	0.0363309	0.110107
15814	b1695	-0.137618	-0.642794		15814	b1695	-0.257869	-0.642794		15814	b1695	-0.313963	-1.5628
15816	b1697	0.135521	0.689499		15816	b1697	0.131051	0.689499		15816	b1697	-0.0980538	-0.395466
15817	b1698	0.124938	0.33184		15817	b1698	0.371565	0.33184		15817	b1698	0.330803	0.857579
15818	b1699	-0.342387	-0.662985		15818	b1699	-0.00784523	-0.662985		15818	b1699	-0.169069	-0.614575
15820	b1701	-0.037697	-0.16159		15820	b1701	-0.105659	-0.16159		15820	b1701	0.235825	1.09238
15821	b1702	0.0856119	0.41574		15821	b1702	0.374911	0.41574		15821	b1702	-0.0454191	-0.236665
15822	b1703	-0.23399	-1.22166		15822	b1703	-0.145193	-1.22166		15822	b1703	0.230627	0.952245
15823	b1704	0.0813567	0.29683		15823	b1704	0.0695336	0.29683		15823	b1704	0.0462126	0.209819
15825	b1706	-0.317994	-1.18227		15825	b1706	-0.0971334	-1.18227		15825	b1706	-0.26624	-1.10346
15826	b1707	-0.116251	-0.31261		15826	b1707	-0.0331133	-0.31261		15826	b1707	-0.988334	-2.13361
15827	b1708	0.013254	0.0243175		15827	b1708	0.459632	0.0243175		15827	b1708	0.310476	1.02127
15829	b1710	0.437116	1.04385		15829	b1710	0.295165	1.04385		15829	b1710	0.239369	0.499359
15830	b1711	0.0535038	0.126447		15830	b1711	-0.111684	0.126447		15830	b1711	-0.2053	-0.583974
15840	b1722	-0.358238	-1.45571		15840	b1722	-0.228837	-1.45571		15840	b1722	-0.283614	-1.4884
15841	b1723	0.0652089	0.274466		15841	b1723	-0.06683	0.274466		15841	b1723	0.199133	0.855906
15843	b1725	-0.0587795	-0.231476		15843	b1725	0.306219	-0.231476		15843	b1725	0.381859	1.53838
15845	b1727	-1.03329	-2.37544		15845	b1727	-1.0459	-2.37544		15845	b1727	-0.462027	-1.26774
15846	b1728	0.266984	0.794778		15846	b1728	0.347669	0.794778		15846	b1728	0.370399	0.806888
15847	b1729	-0.673405	-1.5286		15847	b1729	-0.568245	-1.5286		15847	b1729	-0.632	-1.92976
15849	b1731	0.802894	1.72713		15849	b1731	0.441897	1.72713		15849	b1731	0.546863	1.05819
15851	b1733	0.097299	0.351085		15851	b1733	0.283657	0.351085		15851	b1733	0.236506	0.62481
15852	b1734	-0.197961	-0.644328		15852	b1734	-0.179245	-0.644328		15852	b1734	-0.215753	-0.854355
15855	b1737	0.048014	0.200307		15855	b1737	0.0404448	0.200307		15855	b1737	0.165473	0.633464
15856	b1738	0.207481	0.918357		15856	b1738	0.171862	0.918357		15856	b1738	0.290022	1.30344
15857	b1739	-0.818496	-1.87898		15857	b1739	-1.04167	-1.87898		15857	b1739	-0.332708	-0.645993
15859	b1741	0.131875	0.305051		15859	b1741	0.217152	0.305051		15859	b1741	0.189717	0.479901
15861	b1743	0.238496	1.31078		15861	b1743	0.187551	1.31078		15861	b1743	0.125376	0.400735
15862	b1744	-0.237012	-1.09101		15862	b1744	-0.266814	-1.09101		15862	b1744	-0.125486	-0.433361
15863	b1745	-0.141377	-0.70517		15863	b1745	-0.661586	-0.70517		15863	b1745	-0.398916	-1.51209
15864	b1746	0.0515946	0.191637		15864	b1746	-0.274002	0.191637		15864	b1746	-0.0288552	-0.116102
15865	b1747	-0.261857	-0.993417		15865	b1747	-0.202728	-0.993417		15865	b1747	-0.284659	-0.965846
15866	b1748	-0.170433	-0.796526		15866	b1748	0.207829	-0.796526		15866	b1748	0.142223	0.571494
15867	b1749	-0.24326	-0.936712		15867	b1749	-0.174223	-0.936712		15867	b1749	0.258175	0.888236
15868	b1750	0.0462881	0.178707		15868	b1750	-0.231626	0.178707		15868	b1750	-0.355435	-1.41484
15869	b1751	-0.442094	-1.15977		15869	b1751	-0.173433	-1.15977		15869	b1751	-0.460329	-1.30761
15870	b1752	0.415345	1.49367		15870	b1752	0.348546	1.49367		15870	b1752	-0.1084	-0.235249
15871	b1753	-0.946113	-1.85564		15871	b1753	-0.675928	-1.85564		15871	b1753	-0.262606	-0.615933
15873	b1755	-0.0507009	-0.208294		15873	b1755	-0.0913284	-0.208294		15873	b1755	-0.0914825	-0.308787
15874	b1756	-0.0996287	-0.443112		15874	b1756	0.29386	-0.443112		15874	b1756	0.545847	2.2556
15875	b1757	-0.105444	-0.296493		15875	b1757	-0.488463	-0.296493		15875	b1757	-0.0529954	-0.183984
15878	b1760	-0.526227	-1.27603		15878	b1760	-0.635671	-1.27603		15878	b1760	-0.385659	-1.73945
15879	b1761	-0.309224	-1.28624		15879	b1761	0.0145402	-1.28624		15879	b1761	-0.0544714	-0.255624
15881	b1763	-0.0835666	-0.372582		15881	b1763	-0.793152	-0.372582		15881	b1763	-0.202043	-0.630766
15882	b1764	-0.519909	-1.65424		15882	b1764	-0.274346	-1.65424		15882	b1764	-0.587199	-1.49364
15884	b1766	0.0543797	0.252737		15884	b1766	-0.152331	0.252737		15884	b1766	-0.0135169	-0.0534333
15885	b1767	0.109764	0.542778		15885	b1767	-0.0858552	0.542778		15885	b1767	0.140828	0.532431
15886	b1768	0.0842071	0.477799		15886	b1768	0.0527384	0.477799		15886	b1768	0.0159424	0.0770551
15887	b1769	0.132056	0.466988		15887	b1769	0.0382336	0.466988		15887	b1769	-0.352373	-0.734758
15888	b1770	-0.352474	-1.74188		15888	b1770	-0.298411	-1.74188		15888	b1770	-0.527099	-2.16888
15889	b1771	-0.148343	-0.715895		15889	b1771	-0.178038	-0.715895		15889	b1771	-0.233169	-1.1544
15890	b1772	-0.273799	-0.842127		15890	b1772	0.163176	-0.842127		15890	b1772	0.327062	0.929194
15892	b1774	-0.265042	-1.00904		15892	b1774	-0.462441	-1.00904		15892	b1774	-0.267297	-1.01327
15893	b1775	0.26009	1.57829		15893	b1775	0.16859	1.57829		15893	b1775	0.125794	0.730562
15894	b1776	0.310607	1.13242		15894	b1776	0.269048	1.13242		15894	b1776	0.212488	1.07765
15895	b1777	-0.871533	-1.52058		15895	b1777	-0.723984	-1.52058		15895	b1777	-0.143	-0.289367
15898	b1780	-0.591675	-2.51267		15898	b1780	-0.568979	-2.51267		15898	b1780	-0.446354	-1.57552
15899	b1781	0.408883	1.46552		15899	b1781	0.388991	1.46552		15899	b1781	0.123649	0.476889
15900	b1782	-0.251464	-0.792018		15900	b1782	0.189486	-0.792018		15900	b1782	0.0431632	0.136714
15901	b1783	0.240727	1.08193		15901	b1783	0.189872	1.08193		15901	b1783	0.235956	1.00126
15902	b1784	-0.108516	-0.417557		15902	b1784	0.0205139	-0.417557		15902	b1784	-0.207275	-0.933212
15904	b1786	0.0928994	0.641535		15904	b1786	-0.0817728	0.641535		15904	b1786	0.0864624	0.575483
15905	b1787	0.69299	2.8942		15905	b1787	0.251626	2.8942		15905	b1787	0.466437	2.05076
15907	b1789	0.22934	0.605659		15907	b1789	0.217671	0.605659		15907	b1789	-0.173468	-0.399252
15908	b1790	-0.0696791	-0.138038		15908	b1790	-0.191305	-0.138038		15908	b1790	0.248333	0.562375
15909	b1791	0.173833	0.640988		15909	b1791	0.282666	0.640988		15909	b1791	0.327428	1.27771
15910	b1792	0.315627	1.07648		15910	b1792	-0.86819	1.07648		15910	b1792	-0.21318	-0.512358
15911	b1793	-0.381051	-0.444677		15911	b1793	-0.374063	-0.444677		15911	b1793	-0.433687	-1.10524
15912	b1794	-0.117445	-0.414115		15912	b1794	-0.0522587	-0.414115		15912	b1794	-0.202264	-0.789978
15913	b1795	0.20332	0.534993		15913	b1795	0.142081	0.534993		15913	b1795	0.130821	0.310347
15914	b1796	-0.20697	-0.835707		15914	b1796	-0.508917	-0.835707		15914	b1796	0.00851434	0.0347813
15915	b1797	0.17955	0.891547		15915	b1797	0.047863	0.891547		15915	b1797	0.167039	0.724841
15916	b1798	-0.212861	-0.927197		15916	b1798	-0.353937	-0.927197		15916	b1798	-0.152445	-0.746324
15917	b1799	-0.871378	-2.11909		15917	b1799	-1.17998	-2.11909		15917	b1799	-0.795255	-1.84496
15918	b1800	-0.1086	-0.529202		15918	b1800	0.070038	-0.529202		15918	b1800	0.0576675	0.293229
15919	b1801	-0.114471	-0.509288		15919	b1801	-0.0563642	-0.509288		15919	b1801	-0.297285	-1.73477
15920	b1802	-0.536817	-1.93152		15920	b1802	-0.139044	-1.93152		15920	b1802	0.141977	0.416767
15921	b1803	0.329111	0.873723		15921	b1803	0.45246	0.873723		15921	b1803	-0.191175	-0.528249
15922	b1804	-0.685311	-2.05461		15922	b1804	-0.650696	-2.05461		15922	b1804	-0.459755	-1.17846
15923	b1805	-0.17544	-0.888178		15923	b1805	-0.159147	-0.888178		15923	b1805	-0.252336	-1.35695
15924	b1806	0.286028	1.08807		15924	b1806	0.351446	1.08807		15924	b1806	0.0525247	0.165158
15926	b1808	0.135686	0.560461		15926	b1808	0.049874	0.560461		15926	b1808	0.498862	2.36661
15927	b1809	-0.217826	-1.11739		15927	b1809	-0.315504	-1.11739		15927	b1809	-0.125017	-0.707308
15928	b1810	-0.192451	-0.89426		15928	b1810	-0.0927585	-0.89426		15928	b1810	-0.281873	-1.15458
15929	b1811	0.340883	0.718814		15929	b1811	0.449548	0.718814		15929	b1811	0.441415	1.14984
15930	b1812	0.107337	0.358036		15930	b1812	0.20427	0.358036		15930	b1812	0.477255	1.50426
15931	b1813	-0.342516	-1.6273		15931	b1813	-0.404905	-1.6273		15931	b1813	0.0597712	0.265327
15932	b1814	-0.45093	-0.925469		15932	b1814	-0.657838	-0.925469		15932	b1814	-0.219644	-0.416841
15933	b1815	0.21039	0.848976		15933	b1815	0.215328	0.848976		15933	b1815	-0.0410219	-0.152078
15934	b1816	0.156024	0.721449		15934	b1816	0.213256	0.721449		15934	b1816	0.248404	0.875541
15935	b1817	0.253447	1.2601		15935	b1817	0.405266	1.2601		15935	b1817	0.403534	1.73516
15937	b1819	-0.314247	-1.21641		15937	b1819	-0.278756	-1.21641		15937	b1819	-0.048339	-0.216208
15938	b1820	-0.0230954	-0.133022		15938	b1820	-0.103347	-0.133022		15938	b1820	-0.0309884	-0.161095
15939	b1821	-0.379817	-0.988976		15939	b1821	-0.53537	-0.988976		15939	b1821	-0.196396	-0.516802
15940	b1822	-0.0863098	-0.311493		15940	b1822	-0.108896	-0.311493		15940	b1822	0.00571576	0.0213346
15942	b1824	0.425752	1.02082		15942	b1824	0.612767	1.02082		15942	b1824	0.34694	1.14789
15945	b1827	-0.634484	-1.27235		15945	b1827	0.375663	-1.27235		15945	b1827	-0.114307	-0.299738
15946	b1828	0.477044	1.89068		15946	b1828	0.302698	1.89068		15946	b1828	0.205265	0.886356
15947	b1829	0.214168	0.872315		15947	b1829	0.533495	0.872315		15947	b1829	0.402956	1.25717
15948	b1830	-0.67895	-2.47153		15948	b1830	-0.8169	-2.47153		15948	b1830	-0.741785	-2.99834
15950	b1832	-0.598658	-2.32323		15950	b1832	-0.546379	-2.32323		15950	b1832	-0.597549	-2.37094
15951	b1833	-0.329802	-1.62057		15951	b1833	-0.0261857	-1.62057		15951	b1833	-0.0673412	-0.319397
15952	b1834	-0.0194454	-0.120601		15952	b1834	0.0616659	-0.120601		15952	b1834	0.0492264	0.313338
15953	b1835	-0.786803	-2.63357		15953	b1835	-0.30076	-2.63357		15953	b1835	-0.263327	-0.779336
15954	b1836	0.646891	1.14786		15954	b1836	0.265975	1.14786		15954	b1836	0.448924	1.07718
15956	b1838	-0.302224	-0.798697		15956	b1838	-0.149803	-0.798697		15956	b1838	-0.17125	-0.451437
15958	b1840	-0.393283	-1.60688		15958	b1840	0.112507	-1.60688		15958	b1840	0.141648	0.659947
15961	b1843	0.119829	0.458422		15961	b1843	0.0529411	0.458422		15961	b1843	0.511628	1.18602
15962	b1844	-0.241513	-0.791901		15962	b1844	-0.464488	-0.791901		15962	b1844	-0.261441	-1.08093
15963	b1845	-0.00131261	-0.00679638		15963	b1845	-0.193948	-0.00679638		15963	b1845	-0.13279	-0.708343
15964	b1846	-0.00425388	-0.0124192		15964	b1846	-0.0629818	-0.0124192		15964	b1846	-0.0300854	-0.0897753
15967	b1849	0.00948763	0.0383917		15967	b1849	-0.370575	0.0383917		15967	b1849	0.138932	0.481386
15969	b1851	-0.281814	-1.70537		15969	b1851	-0.298293	-1.70537		15969	b1851	-0.124233	-0.77211
15971	b1853	-0.604545	-1.34857		15971	b1853	0.364707	-1.34857		15971	b1853	-0.140065	-0.358095
15972	b1854	-0.123662	-0.517536		15972	b1854	-0.397455	-0.517536		15972	b1854	0.0665672	0.261951
15973	b1855	-1.09184	-1.76105		15973	b1855	-1.46924	-1.76105		15973	b1855	-0.34156	-0.810122
15974	b1856	-1.39071	-5.87039		15974	b1856	-1.21161	-5.87039		15974	b1856	-0.89282	-3.92576
15975	b1857	-0.0474083	-0.192539		15975	b1857	-0.0609252	-0.192539		15975	b1857	-0.21772	-0.788606
15976	b1858	-0.27931	-0.80686		15976	b1858	0.255813	-0.80686		15976	b1858	0.227551	1.01565
15977	b1859	0.205133	0.65868		15977	b1859	0.370368	0.65868		15977	b1859	0.242011	1.03231
15980	b1862	-0.443139	-1.06507		15980	b1862	-0.694724	-1.06507		15980	b1862	-0.482988	-1.20033
15982	b1864	-0.241155	-1.07006		15982	b1864	-0.124377	-1.07006		15982	b1864	-0.281599	-0.951654
15985	b1867	0.582156	1.81516		15985	b1867	0.437893	1.81516		15985	b1867	0.437967	1.42842
15986	b1868	-0.0151862	-0.0327843		15986	b1868	0.237302	-0.0327843		15986	b1868	0.239831	0.324185
15987	b1869	0.0270088	0.122458		15987	b1869	0.159011	0.122458		15987	b1869	0.411802	1.75442
15990	b1872	-0.298173	-1.23277		15990	b1872	-0.2394	-1.23277		15990	b1872	-0.25811	-1.17422
15991	b1873	-0.320726	-1.37596		15991	b1873	-0.475353	-1.37596		15991	b1873	-0.245613	-1.07012
15993	b1875	-0.0526451	-0.185115		15993	b1875	0.0888005	-0.185115		15993	b1875	-0.364451	-1.30475
15996	b1878	0.30665	0.990709		15996	b1878	-0.141803	0.990709		15996	b1878	0.13618	0.41613
15997	b1879	-0.16465	-0.861737		15997	b1879	0.0407518	-0.861737		15997	b1879	0.155046	0.859112
15998	b1880	0.0296964	0.145241		15998	b1880	0.143005	0.145241		15998	b1880	0.499498	2.20577
15999	b1881	0.183575	0.826892		15999	b1881	0.245447	0.826892		15999	b1881	0.353083	1.84957
16001	b1883	0.0404194	0.179656		16001	b1883	0.302761	0.179656		16001	b1883	-0.141307	-0.496229
16002	b1884	-0.0810012	-0.319192		16002	b1884	-0.191603	-0.319192		16002	b1884	-0.164702	-0.669366
16003	b1885	0.163858	0.681397		16003	b1885	0.238572	0.681397		16003	b1885	0.0841609	0.365448
16004	b1886	-0.0198571	-0.095532		16004	b1886	0.0830462	-0.095532		16004	b1886	-0.0577563	-0.287442
16005	b1887	-0.115441	-0.564168		16005	b1887	-0.0122046	-0.564168		16005	b1887	-0.0772114	-0.500092
16006	b1888	0.319651	1.39296		16006	b1888	0.184657	1.39296		16006	b1888	0.46958	1.94604
16007	b1889	-0.677143	-3.31994		16007	b1889	-0.609144	-3.31994		16007	b1889	-0.601859	-2.36928
16008	b1890	-0.533131	-1.54799		16008	b1890	-0.286777	-1.54799		16008	b1890	-0.239812	-0.820486
16009	b1891	-0.344566	-0.869818		16009	b1891	0.0357093	-0.869818		16009	b1891	-0.0245973	-0.0547453
16010	b1892	-0.283494	-0.97903		16010	b1892	-0.0105731	-0.97903		16010	b1892	-0.0201245	-0.101875
16013	b1895	0.0676483	0.256461		16013	b1895	0.140363	0.256461		16013	b1895	0.226879	0.899434
16014	b1896	-0.0795129	-0.579306		16014	b1896	0.0258342	-0.579306		16014	b1896	0.0461813	0.316694
16015	b1897	0.00515691	0.0214796		16015	b1897	0.115947	0.0214796		16015	b1897	0.276382	1.06158
16017	b1900	0.371924	1.22147		16017	b1900	0.249503	1.22147		16017	b1900	0.308854	1.15432
16018	b1901	0.234656	0.607306		16018	b1901	0.412632	0.607306		16018	b1901	0.676995	2.07496
16019	b1902	0.192114	0.600653		16019	b1902	0.436035	0.600653		16019	b1902	-0.0266371	-0.0661754
16021	b1904	-0.180989	-0.420561		16021	b1904	-0.233634	-0.420561		16021	b1904	0.0150117	0.0394154
16022	b1905	0.182469	0.809493		16022	b1905	0.0706527	0.809493		16022	b1905	0.157318	0.730876
16024	b1907	0.0417383	0.113403		16024	b1907	0.0196285	0.113403		16024	b1907	-0.287088	-0.712782
16025	b1908	-0.330735	-0.829562		16025	b1908	-0.302561	-0.829562		16025	b1908	-0.0929377	-0.353741
16027	b1913	0.0516078	0.216957		16027	b1913	-0.143341	0.216957		16027	b1913	-0.18641	-0.804543
16028	b1914	-0.221604	-0.902665		16028	b1914	-0.121975	-0.902665		16028	b1914	-0.126885	-0.504196
16029	b1915	-0.00126698	-0.00496384		16029	b1915	0.224305	-0.00496384		16029	b1915	0.138612	0.422468
16030	b1916	-0.0190934	-0.113234		16030	b1916	-0.088893	-0.113234		16030	b1916	-0.0622373	-0.368005
16031	b1917	0.160562	0.426482		16031	b1917	-0.2812	0.426482		16031	b1917	0.138803	0.427412
16032	b1918	0.53338	1.08027		16032	b1918	0.720434	1.08027		16032	b1918	0.45516	1.4291
16033	b1919	0.429228	1.54934		16033	b1919	0.247031	1.54934		16033	b1919	0.0675558	0.285155
16035	b1921	-0.303985	-0.657294		16035	b1921	-0.544243	-0.657294		16035	b1921	-0.230382	-0.496237
16036	b1922	-0.0926237	-0.465665		16036	b1922	-0.522364	-0.465665		16036	b1922	-0.141974	-0.734027
16037	b1923	0.090513	0.506684		16037	b1923	-0.0573536	0.506684		16037	b1923	0.128917	0.638397
16038	b1924	0.254714	0.655864		16038	b1924	0.33303	0.655864		16038	b1924	0.27346	0.756843
16039	b1925	0.0514175	0.147674		16039	b1925	-0.147041	0.147674		16039	b1925	0.11867	0.337222
16040	b1926	-0.00538523	-0.0072309		16040	b1926	0.638371	-0.0072309		16040	b1926	0.390874	0.673661
16041	b1927	-0.0438147	-0.208635		16041	b1927	-0.100501	-0.208635		16041	b1927	-0.130833	-0.499469
16042	b1928	0.273195	1.25686		16042	b1928	0.227115	1.25686		16042	b1928	-0.0360218	-0.117591
16043	b1929	0.0576377	0.275737		16043	b1929	-0.229371	0.275737		16043	b1929	-0.394096	-1.8889
16044	b1930	0.188799	1.08485		16044	b1930	-0.24292	1.08485		16044	b1930	-0.0945076	-0.514262
16046	b1932	0.298275	1.54575		16046	b1932	0.42405	1.54575		16046	b1932	0.356588	1.56052
16052	b1938	-0.278404	-1.40655		16052	b1938	-0.322191	-1.40655		16052	b1938	-0.260589	-1.53299
16053	b1939	-0.114019	-0.430136		16053	b1939	-0.0343857	-0.430136		16053	b1939	-0.202212	-0.677507
16054	b1940	0.127473	0.453243		16054	b1940	-0.165872	0.453243		16054	b1940	-0.111056	-0.544261
16055	b1941	0.0112948	0.0594353		16055	b1941	-0.0444879	0.0594353		16055	b1941	-0.00169151	-0.00804593
16057	b1943	0.33325	1.33232		16057	b1943	0.0770604	1.33232		16057	b1943	0.315418	1.43983
16058	b1944	0.0910847	0.319072		16058	b1944	-0.232414	0.319072		16058	b1944	-0.176993	-0.74117
16059	b1945	0.410999	2.36173		16059	b1945	0.148363	2.36173		16059	b1945	0.502414	2.47917
16060	b1946	-0.156505	-0.504064		16060	b1946	-0.0797881	-0.504064		16060	b1946	-0.396539	-0.90244
16062	b1948	0.164518	0.441239		16062	b1948	0.208987	0.441239		16062	b1948	0.377673	1.94278
16063	b1949	-0.583297	-1.03617		16063	b1949	-0.584147	-1.03617		16063	b1949	-0.413881	-0.438159
16066	b1952	-0.25919	-1.20998		16066	b1952	0.134418	-1.20998		16066	b1952	-0.0290684	-0.129122
16067	b1953	-0.473532	-1.03501		16067	b1953	-0.935328	-1.03501		16067	b1953	-0.392759	-0.704512
16068	b1955	0.0394286	0.092767		16068	b1955	-0.157376	0.092767		16068	b1955	-0.217242	-0.644856
16069	b1956	0.450596	2.07034		16069	b1956	0.344109	2.07034		16069	b1956	-0.0671158	-0.339661
16071	b1958	-0.327142	-1.24208		16071	b1958	0.203392	-1.24208		16071	b1958	-0.42412	-1.36824
16072	b1959	-0.164478	-0.570447		16072	b1959	-0.0331133	-0.570447		16072	b1959	-0.418219	-0.993478
16073	b1960	1.24809	2.53437		16073	b1960	0.929978	2.53437		16073	b1960	0.996804	2.58104
16075	b1962	0.504761	1.47745		16075	b1962	0.300358	1.47745		16075	b1962	0.648923	2.87732
16076	b1963	-0.0842429	-0.231425		16076	b1963	-0.261246	-0.231425		16076	b1963	-0.205299	-0.686195
16080	b1967	0.233029	1.24163		16080	b1967	0.149575	1.24163		16080	b1967	0.217605	1.10415
16082	b1969	-0.964925	-2.4834		16082	b1969	-1.1125	-2.4834		16082	b1969	-0.791388	-2.32441
16084	b1971	-0.355574	-1.38889		16084	b1971	-0.129257	-1.38889		16084	b1971	-0.0142158	-0.0528843
16085	b1972	0.108132	0.552304		16085	b1972	0.127954	0.552304		16085	b1972	0.117029	0.617772
16086	b1973	-0.690209	-1.44795		16086	b1973	-0.849086	-1.44795		16086	b1973	-0.582488	-1.85493
16087	b1974	0.176175	0.8365		16087	b1974	-0.0826007	0.8365		16087	b1974	-0.127116	-0.765728
16088	b1976	0.397735	0.828072		16088	b1976	0.329264	0.828072		16088	b1976	0.0121021	0.0250558
16089	b1978	0.0111238	0.0884393		16089	b1978	0.027611	0.0884393		16089	b1978	-0.0926835	-0.778181
16092	b1981	0.139377	0.455172		16092	b1981	0.0348739	0.455172		16092	b1981	-0.0994515	-0.364947
16093	b1982	-0.216413	-0.766272		16093	b1982	-0.435657	-0.766272		16093	b1982	-0.0358633	-0.170669
16094	b1983	-0.195232	-0.703236		16094	b1983	0.0286865	-0.703236		16094	b1983	0.263842	0.759756
16095	b1985	-0.472627	-2.43745		16095	b1985	-0.276161	-2.43745		16095	b1985	-0.529395	-2.1164
16096	b1987	-0.0275956	-0.119272		16096	b1987	-0.0446244	-0.119272		16096	b1987	0.0522055	0.18761
16097	b1988	0.536236	2.00957		16097	b1988	0.254485	2.00957		16097	b1988	0.0639031	0.145267
16098	b1990	0.0591504	0.310036		16098	b1990	0.0557603	0.310036		16098	b1990	-0.185327	-0.952575
16099	b1991	-0.318756	-1.52905		16099	b1991	-0.416793	-1.52905		16099	b1991	-0.780032	-3.32851
16101	b1993	-0.0483938	-0.206941		16101	b1993	-0.0324234	-0.206941		16101	b1993	-0.110431	-0.487528
16107	b1999	0.133051	0.550311		16107	b1999	-0.17635	0.550311		16107	b1999	-0.25924	-0.609586
16109	b2001	0.0712019	0.368942		16109	b2001	0.0828918	0.368942		16109	b2001	-0.0211255	-0.12299
16110	b2002	0.0191385	0.0800855		16110	b2002	-0.0452323	0.0800855		16110	b2002	0.261586	1.32201
16111	b2003	0.20976	0.609018		16111	b2003	-0.153476	0.609018		16111	b2003	0.127045	0.339483
16112	b2004	-0.353284	-1.4919		16112	b2004	-0.0590759	-1.4919		16112	b2004	-0.120446	-0.37147
16113	b2005	-0.263549	-0.720882		16113	b2005	-0.390699	-0.720882		16113	b2005	-0.0412618	-0.180224
16114	b2006	-0.186854	-0.42055		16114	b2006	0.198844	-0.42055		16114	b2006	-0.25614	-0.802025
16115	b2007	0.054556	0.149975		16115	b2007	0.254906	0.149975		16115	b2007	-0.428141	-0.670542
16116	b2008	0.308375	1.13083		16116	b2008	0.413771	1.13083		16116	b2008	0.0086115	0.0378777
16117	b2009	-0.125117	-0.35635		16117	b2009	-0.693723	-0.35635		16117	b2009	-0.103551	-0.30688
16118	b2010	0.00127028	0.00550515		16118	b2010	0.0541	0.00550515		16118	b2010	-0.0325857	-0.109482
16119	b2011	-0.280156	-1.44527		16119	b2011	-0.0351267	-1.44527		16119	b2011	-0.130638	-0.634512
16120	b2012	0.578058	0.986613		16120	b2012	0.584356	0.986613		16120	b2012	0.736024	1.95403
16121	b2013	0.100733	0.497835		16121	b2013	0.219579	0.497835		16121	b2013	0.26691	1.15227
16122	b2014	-0.0323391	-0.191702		16122	b2014	0.140597	-0.191702		16122	b2014	0.00795807	0.0434911
16123	b2015	0.517826	1.66926		16123	b2015	0.256539	1.66926		16123	b2015	0.427579	1.15834
16124	b2016	0.221732	1.08284		16124	b2016	0.0945793	1.08284		16124	b2016	0.0918444	0.412905
16127	b2019	-0.12792	-0.47231		16127	b2019	-0.0978072	-0.47231		16127	b2019	-0.0725819	-0.216253
16128	b2020	0.164219	0.721347		16128	b2020	0.0514898	0.721347		16128	b2020	0.129796	0.844475
16129	b2021	0.0992399	0.355408		16129	b2021	-0.091165	0.355408		16129	b2021	-0.294949	-1.16768
16130	b2022	0.42033	2.07951		16130	b2022	0.347256	2.07951		16130	b2022	0.358826	1.83185
16131	b2023	0.0198855	0.0782157		16131	b2023	0.120687	0.0782157		16131	b2023	-0.341119	-1.60292
16132	b2024	-0.0936583	-0.229905		16132	b2024	-0.506725	-0.229905		16132	b2024	-0.43578	-0.873291
16133	b2025	-0.298521	-0.791074		16133	b2025	-0.582104	-0.791074		16133	b2025	-0.679224	-2.02237
16134	b2026	0.370023	2.32414		16134	b2026	0.109062	2.32414		16134	b2026	0.221244	1.10364
16135	b2027	-0.417928	-1.22552		16135	b2027	-0.120426	-1.22552		16135	b2027	0.0627645	0.322396
16136	b2028	-0.172942	-1.03898		16136	b2028	-0.133966	-1.03898		16136	b2028	-0.243324	-1.28735
16137	b2029	0.0554756	0.225872		16137	b2029	0.150741	0.225872		16137	b2029	-0.0203165	-0.103291
16140	b2032	-0.182433	-0.962572		16140	b2032	-0.0639256	-0.962572		16140	b2032	-0.523736	-2.67529
16141	b2033	-0.370587	-1.73284		16141	b2033	-0.0704933	-1.73284		16141	b2033	-0.161525	-0.746175
16142	b2034	0.180245	1.26308		16142	b2034	0.173028	1.26308		16142	b2034	-0.00812175	-0.0497845
16143	b2035	-0.173697	-0.96907		16143	b2035	-0.0376536	-0.96907		16143	b2035	-0.0453647	-0.272959
16144	b2036	-0.187962	-1.14627		16144	b2036	-0.147551	-1.14627		16144	b2036	-0.0396542	-0.241052
16145	b2037	-0.368657	-1.65678		16145	b2037	-0.309688	-1.65678		16145	b2037	-0.613227	-2.93804
16146	b2038	0.131439	0.679273		16146	b2038	-0.253938	0.679273		16146	b2038	0.0768856	0.366679
16147	b2039	0.0775298	0.584818		16147	b2039	0.175835	0.584818		16147	b2039	0.0442728	0.317406
16148	b2040	0.248788	1.50058		16148	b2040	-0.004821	1.50058		16148	b2040	0.161087	0.951549
16149	b2041	0.0443941	0.329151		16149	b2041	0.101149	0.329151		16149	b2041	0.0461455	0.351907
16150	b2042	0.39309	1.75311		16150	b2042	0.401306	1.75311		16150	b2042	0.307048	1.6295
16151	b2043	0.0491646	0.283681		16151	b2043	0.0809445	0.283681		16151	b2043	0.0818476	0.443628
16152	b2044	-0.0732448	-0.223047		16152	b2044	-0.215786	-0.223047		16152	b2044	-0.0194848	-0.0501341
16153	b2045	0.333015	2.05715		16153	b2045	0.332145	2.05715		16153	b2045	0.208975	1.19207
16154	b2046	-0.435002	-2.13294		16154	b2046	-0.209807	-2.13294		16154	b2046	-0.196479	-0.968865
16155	b2047	0.167775	0.580309		16155	b2047	-0.0549538	0.580309		16155	b2047	0.198511	0.779007
16156	b2048	-0.0436055	-0.147166		16156	b2048	-0.479472	-0.147166		16156	b2048	-0.0120763	-0.0397758
16157	b2049	0.000648016	0.00241377		16157	b2049	0.0827448	0.00241377		16157	b2049	0.0304393	0.116938
16158	b2050	0.0298824	0.09809		16158	b2050	0.0393596	0.09809		16158	b2050	-0.0312442	-0.111936
16160	b2052	0.0682778	0.26163		16160	b2052	0.166213	0.26163		16160	b2052	-0.0404828	-0.188886
16161	b2053	0.183667	0.625711		16161	b2053	0.341984	0.625711		16161	b2053	0.270585	1.22139
16162	b2054	-0.00989592	-0.0302467		16162	b2054	-0.142779	-0.0302467		16162	b2054	-0.0764031	-0.213837
16164	b2056	-0.205689	-1.22218		16164	b2056	-0.028814	-1.22218		16164	b2056	-0.178956	-0.916251
16165	b2057	0.0458501	0.156417		16165	b2057	0.046472	0.156417		16165	b2057	0.252247	0.962302
16167	b2059	-0.329671	-1.58957		16167	b2059	0.0170433	-1.58957		16167	b2059	-0.326829	-1.16264
16168	b2060	0.045507	0.182742		16168	b2060	-0.292551	0.182742		16168	b2060	0.0458943	0.180208
16169	b2061	-0.62039	-1.13465		16169	b2061	-0.280635	-1.13465		16169	b2061	0.456372	0.993346
16170	b2062	6.78697e-05	0.000357449		16170	b2062	0.0416798	0.000357449		16170	b2062	0.202477	1.0449
16171	b2063	-0.180172	-0.851903		16171	b2063	0.120646	-0.851903		16171	b2063	-0.00405052	-0.0158777
16172	b2064	-0.00761926	-0.0432197		16172	b2064	0.0654707	-0.0432197		16172	b2064	-0.0685182	-0.392455
16174	b2066	0.461081	1.55976		16174	b2066	-0.193776	1.55976		16174	b2066	-0.018912	-0.0737204
16175	b2067	-0.171277	-1.0689		16175	b2067	-0.105652	-1.0689		16175	b2067	-0.117567	-0.748185
16176	b2068	-0.0300979	-0.133588		16176	b2068	-0.0772293	-0.133588		16176	b2068	0.174229	0.564482
16177	b2069	0.0935686	0.506299		16177	b2069	0.135746	0.506299		16177	b2069	0.316143	1.71676
16178	b2070	-0.0005412	-0.00292112		16178	b2070	-0.210906	-0.00292112		16178	b2070	-0.350905	-1.50873
16180	b2072	0.390676	2.0227		16180	b2072	0.434679	2.0227		16180	b2072	0.306748	1.16151
16181	b2073	0.110178	0.499936		16181	b2073	0.146668	0.499936		16181	b2073	0.203283	1.0174
16182	b2074	0.0592639	0.236525		16182	b2074	0.397229	0.236525		16182	b2074	0.0980231	0.47584
16183	b2075	-0.0214862	-0.144972		16183	b2075	0.0169311	-0.144972		16183	b2075	0.112693	0.825131
16184	b2076	-0.0202741	-0.0961976		16184	b2076	-0.0284029	-0.0961976		16184	b2076	0.185122	1.21061
16185	b2077	-0.35861	-1.89315		16185	b2077	-0.200035	-1.89315		16185	b2077	-0.0976936	-0.51236
16186	b2078	-0.020948	-0.0965697		16186	b2078	-0.197282	-0.0965697		16186	b2078	-0.100967	-0.578051
16187	b2079	0.231027	0.794761		16187	b2079	0.228535	0.794761		16187	b2079	0.400333	1.13621
16188	b2080	-0.00112954	-0.00203361		16188	b2080	-0.382766	-0.00203361		16188	b2080	0.358374	0.686587
16189	b2081	-0.0976397	-0.47052		16189	b2081	-0.11375	-0.47052		16189	b2081	0.143411	0.759463
16190	b2082	-0.552778	-1.64884		16190	b2082	-0.448076	-1.64884		16190	b2082	-0.605479	-1.55804
16193	b2085	-1.30038	-2.37452		16193	b2085	-1.86639	-2.37452		16193	b2085	-1.26011	-2.20895
16194	b2086	-0.405315	-2.32725		16194	b2086	-0.458409	-2.32725		16194	b2086	-0.267932	-1.29943
16198	b2091	-0.0692594	-0.344142		16198	b2091	0.103954	-0.344142		16198	b2091	0.112663	0.551659
16199	b2092	-0.0969657	-0.524133		16199	b2092	0.252574	-0.524133		16199	b2092	0.200685	1.0933
16200	b2093	0.169858	0.283236		16200	b2093	0.202912	0.283236		16200	b2093	0.428935	0.726503
16201	b2094	0.173796	0.709624		16201	b2094	0.353421	0.709624		16201	b2094	0.242276	1.28111
16202	b2095	-0.168099	-0.66572		16202	b2095	-0.235792	-0.66572		16202	b2095	0.0795162	0.357724
16203	b2096	0.518109	2.219		16203	b2096	0.230729	2.219		16203	b2096	0.275485	0.836089
16204	b2097	-0.123569	-0.543038		16204	b2097	0.0141983	-0.543038		16204	b2097	0.0761264	0.352316
16205	b2098	-0.450528	-1.87122		16205	b2098	-0.0432308	-1.87122		16205	b2098	0.0758675	0.330449
16206	b2099	-0.280996	-1.10469		16206	b2099	-0.613173	-1.10469		16206	b2099	-0.147807	-0.782941
16207	b2100	-0.100177	-0.324599		16207	b2100	-0.14552	-0.324599		16207	b2100	-0.253742	-1.17538
16208	b2101	-0.228673	-0.784217		16208	b2101	0.107022	-0.784217		16208	b2101	0.0729736	0.223873
16209	b2102	-0.119081	-0.454032		16209	b2102	-0.133057	-0.454032		16209	b2102	0.358566	1.33805
16210	b2103	0.0812703	0.353204		16210	b2103	-0.227021	0.353204		16210	b2103	0.0963074	0.383349
16211	b2104	-0.235261	-0.467341		16211	b2104	-0.428795	-0.467341		16211	b2104	0.187763	0.541092
16212	b2105	0.167315	0.558586		16212	b2105	0.176085	0.558586		16212	b2105	0.206951	0.952583
16213	b2106	-0.201457	-1.04138		16213	b2106	-0.229459	-1.04138		16213	b2106	0.0855169	0.447866
16214	b2107	0.0300273	0.209542		16214	b2107	0.0294848	0.209542		16214	b2107	0.0183893	0.125006
16216	b2109	-0.21244	-1.3829		16216	b2109	-0.0254859	-1.3829		16216	b2109	-0.218183	-1.5102
16219	b2112	-0.0355505	-0.204892		16219	b2112	-0.000154409	-0.204892		16219	b2112	0.186025	1.08539
16220	b2113	-0.398455	-1.21565		16220	b2113	-0.575333	-1.21565		16220	b2113	-0.413157	-1.78717
16225	b2118	0.0972332	0.70059		16225	b2118	-0.0902301	0.70059		16225	b2118	0.0224953	0.156768
16227	b2119	0.0334938	0.149112		16227	b2119	0.161878	0.149112		16227	b2119	0.124134	0.580589
16228	b2120	0.146729	0.776425		16228	b2120	-0.20852	0.776425		16228	b2120	0.061734	0.346106
16229	b2121	-0.0512774	-0.26522		16229	b2121	-0.0582674	-0.26522		16229	b2121	0.0953152	0.372913
16230	b2122	-0.118951	-0.595472		16230	b2122	0.0650736	-0.595472		16230	b2122	0.0734486	0.380165
16231	b2123	0.363906	1.31215		16231	b2123	0.404327	1.31215		16231	b2123	0.584911	1.13672
16232	b2124	-0.154361	-0.679546		16232	b2124	-0.182648	-0.679546		16232	b2124	-0.0429764	-0.185332
16233	b2125	-0.317289	-1.4071		16233	b2125	-0.483105	-1.4071		16233	b2125	-0.512524	-2.29139
16234	b2126	0.0819741	0.57118		16234	b2126	0.0415849	0.57118		16234	b2126	0.0422687	0.270381
16235	b2127	-0.0777636	-0.358643		16235	b2127	-0.231681	-0.358643		16235	b2127	-0.0880372	-0.358424
16236	b2128	-0.0417129	-0.140488		16236	b2128	0.223621	-0.140488		16236	b2128	0.231509	0.689989
16237	b2129	-0.0154286	-0.0687696		16237	b2129	0.299104	-0.0687696		16237	b2129	0.319016	1.64248
16238	b2130	-0.351434	-1.42358		16238	b2130	-0.26721	-1.42358		16238	b2130	-0.215111	-1.10331
16239	b2131	0.18012	0.802664		16239	b2131	-0.17938	0.802664		16239	b2131	-0.0135169	-0.0717439
16240	b2132	-0.28053	-1.86409		16240	b2132	-0.148941	-1.86409		16240	b2132	0.00753216	0.0486835
16241	b2133	-0.155148	-0.594732		16241	b2133	0.21361	-0.594732		16241	b2133	-0.0508885	-0.221132
16242	b2134	-0.319188	-1.73945		16242	b2134	0.0964951	-1.73945		16242	b2134	-0.154756	-0.90888
16243	b2135	0.268231	1.1228		16243	b2135	0.217763	1.1228		16243	b2135	0.119153	0.583142
16244	b2136	-0.0763547	-0.283688		16244	b2136	-0.427638	-0.283688		16244	b2136	-0.628853	-1.86861
16245	b2137	-0.261786	-0.882565		16245	b2137	-0.136564	-0.882565		16245	b2137	-0.214049	-0.81641
16248	b2139	-0.184575	-1.06089		16248	b2139	0.075145	-1.06089		16248	b2139	-0.131435	-0.788266
16249	b2140	-0.121167	-0.640025		16249	b2140	-0.109654	-0.640025		16249	b2140	-0.19457	-1.1347
16250	b2141	0.59912	1.20272		16250	b2141	0.623947	1.20272		16250	b2141	0.749194	2.25348
16251	b2142	0.13788	0.803074		16251	b2142	0.191161	0.803074		16251	b2142	0.0880462	0.428525
16252	b2143	-0.468784	-1.67907		16252	b2143	-0.367526	-1.67907		16252	b2143	-0.269678	-1.01756
16253	b2144	-0.111327	-0.757635		16253	b2144	-0.102953	-0.757635		16253	b2144	-0.0377942	-0.246974
16254	b2145	0.796786	1.33559		16254	b2145	0.657566	1.33559		16254	b2145	0.492416	0.965613
16255	b2146	-0.459085	-2.47775		16255	b2146	-0.435085	-2.47775		16255	b2146	-0.359618	-2.0717
16256	b2147	-0.240721	-1.33282		16256	b2147	0.0471177	-1.33282		16256	b2147	-0.0898412	-0.550445
16257	b2148	-0.0215181	-0.131629		16257	b2148	-0.00144695	-0.131629		16257	b2148	0.167754	1.00926
16258	b2149	-0.208065	-1.0653		16258	b2149	-0.193812	-1.0653		16258	b2149	-0.292374	-1.46398
16259	b2150	-0.18322	-0.543607		16259	b2150	-0.147369	-0.543607		16259	b2150	0.0162298	0.048284
16260	b2151	0.10658	0.455653		16260	b2151	-0.427746	0.455653		16260	b2151	-0.130508	-0.485079
16261	b2152	0.201405	0.701525		16261	b2152	0.312156	0.701525		16261	b2152	0.117142	0.465623
16263	b2154	0.311906	1.40474		16263	b2154	0.684949	1.40474		16263	b2154	0.210156	0.966752
16264	b2155	-0.149988	-0.732056		16264	b2155	-0.0732302	-0.732056		16264	b2155	-0.0925107	-0.367238
16265	b2156	-0.309727	-1.8311		16265	b2156	-0.17663	-1.8311		16265	b2156	-0.191827	-1.00736
16266	b2157	-0.216585	-0.75714		16266	b2157	-0.200819	-0.75714		16266	b2157	-0.108218	-0.388386
16267	b2158	-0.00525152	-0.0322399		16267	b2158	0.164034	-0.0322399		16267	b2158	0.154359	0.902885
16268	b2159	0.155962	0.760589		16268	b2159	-0.0564985	0.760589		16268	b2159	0.138479	0.679104
16269	b2160	0.418541	1.61129		16269	b2160	0.363806	1.61129		16269	b2160	0.431942	1.85992
16270	b2161	-0.0982924	-0.418883		16270	b2161	-0.244668	-0.418883		16270	b2161	-0.00279338	-0.00937874
16271	b2162	-0.0781493	-0.382037		16271	b2162	-0.081866	-0.382037		16271	b2162	-0.0831688	-0.343927
16272	b2163	0.228941	0.645324		16272	b2163	0.0228264	0.645324		16272	b2163	-0.0337088	-0.10239
16273	b2164	-0.18917	-0.952812		16273	b2164	-0.203205	-0.952812		16273	b2164	-0.0919117	-0.479967
16274	b2165	0.0230721	0.0570503		16274	b2165	-0.0742379	0.0570503		16274	b2165	-0.0906135	-0.282188
16275	b2166	0.0862405	0.480857		16275	b2166	-0.219898	0.480857		16275	b2166	0.024668	0.116261
16276	b2167	0.237613	1.4025		16276	b2167	0.188243	1.4025		16276	b2167	0.217631	1.29995
16278	b2169	0.0950433	0.415012		16278	b2169	0.0983931	0.415012		16278	b2169	0.145292	0.601673
16279	b2170	-0.10097	-0.446313		16279	b2170	-0.629898	-0.446313		16279	b2170	-0.11677	-0.396491
16280	b2171	0.146778	0.675484		16280	b2171	0.114097	0.675484		16280	b2171	0.0862292	0.401218
16281	b2172	0.16693	1.11415		16281	b2172	0.100805	1.11415		16281	b2172	-0.0218253	-0.133733
16282	b2173	-0.0731994	-0.322425		16282	b2173	-0.138009	-0.322425		16282	b2173	-0.18517	-0.947861
16283	b2174	0.0561987	0.272152		16283	b2174	-0.36562	0.272152		16283	b2174	-0.0633168	-0.298497
16285	b2176	-0.0274648	-0.153757		16285	b2176	-0.132391	-0.153757		16285	b2176	0.018011	0.0973416
16286	b2177	-0.0810683	-0.452742		16286	b2177	-0.227912	-0.452742		16286	b2177	-0.300504	-1.7016
16287	b2178	0.0151261	0.0520229		16287	b2178	0.276202	0.0520229		16287	b2178	0.31448	1.35473
16288	b2179	-0.244856	-0.882166		16288	b2179	-0.0502777	-0.882166		16288	b2179	-0.119767	-0.480282
16289	b2180	-0.191941	-1.10739		16289	b2180	-0.146932	-1.10739		16289	b2180	0.0190845	0.102265
16290	b2181	0.0573771	0.132146		16290	b2181	0.38048	0.132146		16290	b2181	0.54453	1.17194
16291	b2182	-0.0472675	-0.261415		16291	b2182	-0.287731	-0.261415		16291	b2182	-0.2097	-1.04423
16292	b2183	-0.635503	-1.7576		16292	b2183	-0.190739	-1.7576		16292	b2183	-0.0638803	-0.252195
16293	b2184	0.192887	0.987673		16293	b2184	0.00416875	0.987673		16293	b2184	0.186315	1.06053
16295	b2186	0.278017	1.96122		16295	b2186	0.402394	1.96122		16295	b2186	0.571107	3.72336
16296	b2187	-0.047838	-0.126554		16296	b2187	-0.203706	-0.126554		16296	b2187	0.0581664	0.166846
16297	b2188	-0.660265	-2.72307		16297	b2188	-0.260825	-2.72307		16297	b2188	-0.219256	-0.926524
16298	b2190	-0.0219893	-0.151304		16298	b2190	-0.0496125	-0.151304		16298	b2190	-0.0703376	-0.50281
16301	b2193	0.0404739	0.177112		16301	b2193	0.116274	0.177112		16301	b2193	0.0612991	0.299717
16302	b2194	0.0916726	0.439565		16302	b2194	0.154397	0.439565		16302	b2194	-0.147041	-0.777126
16303	b2195	-0.382125	-0.598126		16303	b2195	-0.0706175	-0.598126		16303	b2195	-0.167106	-0.280373
16304	b2196	0.222226	1.19684		16304	b2196	0.0381375	1.19684		16304	b2196	0.0422087	0.221227
16305	b2197	0.044604	0.163648		16305	b2197	0.0407898	0.163648		16305	b2197	0.273994	0.876324
16306	b2198	0.120296	0.283925		16306	b2198	0.280231	0.283925		16306	b2198	0.388128	0.994323
16307	b2199	0.104499	0.333653		16307	b2199	0.201209	0.333653		16307	b2199	0.422713	1.55239
16308	b2200	-0.172653	-0.623084		16308	b2200	0.0980707	-0.623084		16308	b2200	0.249563	0.897041
16309	b2201	-0.212471	-1.10917		16309	b2201	-0.15295	-1.10917		16309	b2201	-0.102709	-0.38555
16310	b2202	0.414832	1.38173		16310	b2202	0.319048	1.38173		16310	b2202	0.121021	0.310485
16311	b2203	-0.145636	-0.71537		16311	b2203	-0.292419	-0.71537		16311	b2203	0.0411929	0.137627
16312	b2204	0.0802099	0.255709		16312	b2204	-0.181461	0.255709		16312	b2204	-0.187609	-0.554389
16313	b2205	0.239214	1.01381		16313	b2205	0.0217624	1.01381		16313	b2205	0.34189	1.60346
16314	b2206	-0.127515	-0.849472		16314	b2206	-0.117462	-0.849472		16314	b2206	-0.263835	-1.7261
16315	b2207	0.599853	1.88814		16315	b2207	-0.164044	1.88814		16315	b2207	0.272771	0.659033
16316	b2208	-0.355035	-1.18298		16316	b2208	-0.414066	-1.18298		16316	b2208	-0.362122	-1.34755
16318	b2210	0.013286	0.0816498		16318	b2210	-0.0427966	0.0816498		16318	b2210	0.0492486	0.309171
16319	b2211	0.0933756	0.518646		16319	b2211	0.205083	0.518646		16319	b2211	0.227306	1.25376
16320	b2212	0.160318	0.678441		16320	b2212	0.19594	0.678441		16320	b2212	0.345129	1.49443
16321	b2213	0.420979	0.96914		16321	b2213	0.645691	0.96914		16321	b2213	0.120107	0.475342
16322	b2214	-0.0256219	-0.0958959		16322	b2214	-0.10514	-0.0958959		16322	b2214	-0.0204135	-0.0760211
16323	b2215	-0.613824	-2.08562		16323	b2215	-0.779341	-2.08562		16323	b2215	-0.601779	-2.04361
16324	b2216	-0.46768	-2.90986		16324	b2216	-0.332905	-2.90986		16324	b2216	-0.353587	-1.98271
16325	b2217	0.0730216	0.361915		16325	b2217	-0.110443	0.361915		16325	b2217	-0.0849751	-0.396443
16326	b2218	-0.106627	-0.74478		16326	b2218	-0.281326	-0.74478		16326	b2218	-0.289425	-1.77915
16327	b2219	0.0889522	0.639615		16327	b2219	-0.184859	0.639615		16327	b2219	-0.12393	-0.792323
16328	b2220	0.0348631	0.238861		16328	b2220	0.0429036	0.238861		16328	b2220	-0.096799	-0.638248
16329	b2221	0.244797	0.530077		16329	b2221	-0.150213	0.530077		16329	b2221	0.0473328	0.0919931
16330	b2222	-0.0769319	-0.266445		16330	b2222	-0.207122	-0.266445		16330	b2222	-0.104586	-0.483155
16331	b2223	-0.139226	-0.799323		16331	b2223	0.127552	-0.799323		16331	b2223	-0.0767862	-0.396964
16332	b2224	0.0826685	0.442456		16332	b2224	-0.115567	0.442456		16332	b2224	-0.113526	-0.510487
16333	b2225	0.0496745	0.178356		16333	b2225	0.012577	0.178356		16333	b2225	0.111402	0.424586
16334	b2226	0.15408	0.946662		16334	b2226	0.00832444	0.946662		16334	b2226	0.0459408	0.304584
16336	b2229	0.112267	0.394061		16336	b2229	0.594811	0.394061		16336	b2229	0.709474	2.83655
16337	b2230	0.0291403	0.168645		16337	b2230	0.123525	0.168645		16337	b2230	-0.122144	-0.642945
16340	b2233	-0.0383715	-0.272853		16340	b2233	0.0792936	-0.272853		16340	b2233	-0.0583578	-0.390529
16343	b2236	0.66881	2.84023		16343	b2236	0.902349	2.84023		16343	b2236	0.764102	2.18765
16344	b2237	-0.882885	-2.73336		16344	b2237	-0.202653	-2.73336		16344	b2237	-0.463419	-0.837738
16346	b2239	-0.138492	-0.685772		16346	b2239	-0.0696336	-0.685772		16346	b2239	-0.226967	-1.23115
16347	b2240	-0.0183567	-0.102757		16347	b2240	0.00750065	-0.102757		16347	b2240	0.0812665	0.500567
16348	b2241	-0.113519	-0.727771		16348	b2241	-0.0422345	-0.727771		16348	b2241	-0.138265	-1.02393
16349	b2242	0.126752	0.704082		16349	b2242	-0.156959	0.704082		16349	b2242	-0.0842546	-0.494376
16350	b2243	0.033785	0.139912		16350	b2243	0.19141	0.139912		16350	b2243	0.296761	1.36524
16351	b2244	-0.113458	-0.564361		16351	b2244	-0.265306	-0.564361		16351	b2244	-0.20754	-0.871849
16352	b2245	-0.0191213	-0.111668		16352	b2245	-0.160003	-0.111668		16352	b2245	0.047516	0.244282
16353	b2246	-0.147766	-0.65263		16353	b2246	0.224701	-0.65263		16353	b2246	0.131598	0.747774
16354	b2247	0.127953	0.730324		16354	b2247	0.273778	0.730324		16354	b2247	0.309946	1.83225
16356	b2249	0.0387696	0.240627		16356	b2249	0.209372	0.240627		16356	b2249	-0.146453	-0.854241
16357	b2250	-0.342356	-1.19726		16357	b2250	-0.779149	-1.19726		16357	b2250	-0.519477	-1.89834
16358	b2251	0.00548237	0.0219783		16358	b2251	0.163987	0.0219783		16358	b2251	0.0288223	0.104903
16360	b2253	-0.0924227	-0.516447		16360	b2253	0.0127235	-0.516447		16360	b2253	0.0304573	0.186637
16361	b2254	0.0903069	0.553333		16361	b2254	0.087918	0.553333		16361	b2254	0.082654	0.437368
16362	b2255	-0.00473929	-0.0316243		16362	b2255	0.17386	-0.0316243		16362	b2255	-0.0288544	-0.178859
16363	b2256	-0.0388618	-0.191359		16363	b2256	-0.193465	-0.191359		16363	b2256	-0.0400538	-0.245559
16364	b2257	-0.363419	-1.80258		16364	b2257	-0.180229	-1.80258		16364	b2257	-0.130611	-0.784769
16367	b2260	-0.0748133	-0.514205		16367	b2260	-0.155907	-0.514205		16367	b2260	0.0605212	0.346465
16368	b2261	-0.232479	-1.01251		16368	b2261	-0.230367	-1.01251		16368	b2261	-0.209749	-1.00622
16369	b2262	0.248922	0.738751		16369	b2262	0.331644	0.738751		16369	b2262	0.684553	2.59244
16370	b2263	-0.158527	-0.545806		16370	b2263	-0.539237	-0.545806		16370	b2263	-0.479364	-1.5278
16371	b2264	-0.330485	-1.57145		16371	b2264	-0.199	-1.57145		16371	b2264	-0.297899	-1.25311
16372	b2265	0.179896	1.25823		16372	b2265	0.0323842	1.25823		16372	b2265	0.126889	0.785627
16373	b2266	-0.432509	-1.82587		16373	b2266	0.0784876	-1.82587		16373	b2266	-0.331005	-1.46312
16374	b2267	-0.0838302	-0.383633		16374	b2267	-0.0368993	-0.383633		16374	b2267	0.129027	0.429515
16375	b2268	-0.241442	-1.34383		16375	b2268	-0.0978523	-1.34383		16375	b2268	0.00164189	0.0077831
16377	b2270	-0.256837	-1.67696		16377	b2270	-0.129861	-1.67696		16377	b2270	-0.194044	-1.26662
16378	b2271	-0.145369	-0.55153		16378	b2271	-0.246595	-0.55153		16378	b2271	-0.312803	-1.08246
16381	b2274	-0.261736	-0.793111		16381	b2274	0.080619	-0.793111		16381	b2274	-0.170337	-0.398674
16382	b2275	-0.105153	-0.413292		16382	b2275	-0.349696	-0.413292		16382	b2275	-0.270607	-1.14476
16385	b2278	-1.22803	-3.24474		16385	b2278	-1.04954	-3.24474		16385	b2278	-1.03098	-2.88607
16390	b2283	-0.747107	-1.97277		16390	b2283	-1.14063	-1.97277		16390	b2283	-0.462096	-1.19758
16393	b2286	-0.945667	-1.49232		16393	b2286	-0.0648861	-1.49232		16393	b2286	-0.98223	-2.58102
16396	b2289	-0.984456	-6.18279		16396	b2289	-1.05558	-6.18279		16396	b2289	-1.02124	-6.48242
16397	b2290	-0.342369	-2.03995		16397	b2290	-0.159419	-2.03995		16397	b2290	-0.0789016	-0.500873
16398	b2291	0.368998	0.794082		16398	b2291	0.226317	0.794082		16398	b2291	0.533121	1.17761
16399	b2292	-0.0536319	-0.307393		16399	b2292	0.0408168	-0.307393		16399	b2292	0.189465	1.08628
16400	b2293	-0.0397733	-0.10957		16400	b2293	-0.130614	-0.10957		16400	b2293	0.272221	0.826873
16401	b2294	0.171509	0.738995		16401	b2294	0.26234	0.738995		16401	b2294	0.74211	3.45369
16402	b2295	-0.288864	-1.22976		16402	b2295	-0.165387	-1.22976		16402	b2295	0.0126565	0.0538006
16405	b2298	-0.0419188	-0.216367		16405	b2298	0.193546	-0.216367		16405	b2298	0.0796776	0.401411
16406	b2299	-0.0578125	-0.236199		16406	b2299	-0.119992	-0.236199		16406	b2299	0.0441817	0.193775
16407	b2300	-0.133034	-0.387163		16407	b2300	0.00260327	-0.387163		16407	b2300	0.366733	1.08132
16408	b2301	-0.116393	-0.332761		16408	b2301	0.401137	-0.332761		16408	b2301	0.603103	1.87523
16409	b2302	-0.184313	-0.978789		16409	b2302	0.132884	-0.978789		16409	b2302	0.228822	1.23967
16410	b2303	0.0109743	0.0653559		16410	b2303	0.0609334	0.0653559		16410	b2303	0.113732	0.670715
16411	b2304	0.28864	1.59217		16411	b2304	0.0925458	1.59217		16411	b2304	0.126829	0.717113
16412	b2305	-0.164352	-1.00061		16412	b2305	-0.0516311	-1.00061		16412	b2305	0.108415	0.604227
16413	b2306	-0.024592	-0.0988093		16413	b2306	0.0903006	-0.0988093		16413	b2306	0.138882	0.579949
16414	b2307	0.159077	0.895606		16414	b2307	0.0285348	0.895606		16414	b2307	0.22096	1.16693
16415	b2308	-0.146065	-0.638575		16415	b2308	-0.0286294	-0.638575		16415	b2308	-0.110063	-0.64534
16416	b2309	0.0501892	0.162761		16416	b2309	-0.305261	0.162761		16416	b2309	-0.218311	-0.736223
16417	b2310	-0.183472	-0.834852		16417	b2310	0.195757	-0.834852		16417	b2310	-0.0086355	-0.0434454
16419	b2312	-1.30564	-3.00575		16419	b2312	-1.70342	-3.00575		16419	b2312	-2.83703	-4.70496
16420	b2313	-0.27571	-0.60098		16420	b2313	-0.768166	-0.60098		16420	b2313	-0.0407896	-0.104996
16421	b2314	-0.205014	-0.504759		16421	b2314	-0.417987	-0.504759		16421	b2314	0.216198	0.623473
16424	b2317	-0.405134	-1.13288		16424	b2317	0.163985	-1.13288		16424	b2317	0.229878	0.51969
16426	b2319	-0.372012	-1.48415		16426	b2319	-0.219069	-1.48415		16426	b2319	-0.173068	-0.52586
16427	b2320	-0.190727	-0.819501		16427	b2320	-0.106752	-0.819501		16427	b2320	-0.115272	-0.491963
16428	b2321	0.0965257	0.53979		16428	b2321	-0.215652	0.53979		16428	b2321	0.100697	0.549374
16429	b2322	0.0501651	0.294074		16429	b2322	0.263292	0.294074		16429	b2322	0.316683	1.35528
16431	b2324	-0.133222	-0.680754		16431	b2324	0.00211577	-0.680754		16431	b2324	-0.430404	-2.38384
16432	b2325	-0.715877	-2.02211		16432	b2325	-0.33563	-2.02211		16432	b2325	-0.53975	-1.56824
16433	b2326	0.432662	1.65573		16433	b2326	0.224954	1.65573		16433	b2326	0.330698	1.58085
16434	b2327	-0.163151	-0.733321		16434	b2327	-0.0171016	-0.733321		16434	b2327	-0.199256	-0.842769
16435	b2328	0.111305	0.602047		16435	b2328	-0.0557569	0.602047		16435	b2328	0.0672929	0.44355
16438	b2331	-0.0945347	-0.338143		16438	b2331	0.0472023	-0.338143		16438	b2331	0.0507472	0.172522
16439	b2332	-0.218549	-1.30791		16439	b2332	-0.13073	-1.30791		16439	b2332	-0.0536825	-0.330674
16440	b2333	-0.0985541	-0.580644		16440	b2333	0.0927152	-0.580644		16440	b2333	-0.0732598	-0.446965
16441	b2334	0.217709	0.932895		16441	b2334	0.556778	0.932895		16441	b2334	0.0385492	0.227414
16442	b2335	0.159741	0.90498		16442	b2335	0.101128	0.90498		16442	b2335	0.292078	1.57956
16443	b2336	0.192855	0.86864		16443	b2336	0.00604079	0.86864		16443	b2336	-0.200652	-1.00603
16445	b2339	0.169579	0.755971		16445	b2339	0.258825	0.755971		16445	b2339	0.0879937	0.320115
16446	b2340	-0.998642	-1.78798		16446	b2340	-1.75592	-1.78798		16446	b2340	-2.19536	-3.19784
16447	b2341	0.255581	1.60646		16447	b2341	0.509481	1.60646		16447	b2341	0.204537	1.10147
16448	b2342	0.334803	2.10095		16448	b2342	0.320083	2.10095		16448	b2342	0.641874	3.52128
16450	b2344	0.124104	0.642945		16450	b2344	0.165855	0.642945		16450	b2344	-0.111356	-0.684416
16452	b2346	0.250834	1.59978		16452	b2346	-0.0956805	1.59978		16452	b2346	-0.0905962	-0.412587
16453	b2347	0.0139734	0.0752308		16453	b2347	0.291354	0.0752308		16453	b2347	0.0972992	0.437648
16454	b2349	-0.0857928	-0.311874		16454	b2349	-0.439846	-0.311874		16454	b2349	-0.247157	-0.946229
16455	b2350	0.155863	0.616714		16455	b2350	-0.104868	0.616714		16455	b2350	-0.17092	-0.618889
16456	b2351	-0.0816672	-0.583147		16456	b2351	-0.0730685	-0.583147		16456	b2351	-0.054466	-0.375927
16458	b2353	0.184162	1.19232		16458	b2353	0.087944	1.19232		16458	b2353	0.0800127	0.523548
16459	b2354	-0.0677147	-0.266099		16459	b2354	-0.359599	-0.266099		16459	b2354	-0.259077	-0.980499
16460	b2355	0.0922285	0.564525		16460	b2355	-0.0359941	0.564525		16460	b2355	-0.040839	-0.247291
16461	b2356	-0.0126207	-0.0264127		16461	b2356	-0.323029	-0.0264127		16461	b2356	-0.360662	-0.823931
16462	b2357	-0.436721	-1.73944		16462	b2357	-0.287302	-1.73944		16462	b2357	-0.0858069	-0.272171
16463	b2358	0.195233	0.989027		16463	b2358	0.221982	0.989027		16463	b2358	0.421392	1.83304
16464	b2359	0.327753	1.1669		16464	b2359	0.0356464	1.1669		16464	b2359	0.203605	0.712466
16465	b2360	0.0717768	0.461033		16465	b2360	0.0559819	0.461033		16465	b2360	-0.0322931	-0.161951
16466	b2361	0.136158	0.907831		16466	b2361	0.190855	0.907831		16466	b2361	-0.0521861	-0.31675
16467	b2362	-0.21404	-0.698539		16467	b2362	-0.449851	-0.698539		16467	b2362	-0.42288	-1.27371
16469	b2364	0.0257214	0.121931		16469	b2364	0.313578	0.121931		16469	b2364	0.111053	0.561953
16470	b2365	0.306211	1.76667		16470	b2365	0.316214	1.76667		16470	b2365	0.315931	1.86315
16471	b2366	-0.126973	-0.538832		16471	b2366	-0.124097	-0.538832		16471	b2366	-0.525567	-1.99054
16472	b2367	-0.195744	-0.902007		16472	b2367	-0.0997769	-0.902007		16472	b2367	-0.358932	-1.56077
16473	b2368	0.0948962	0.548427		16473	b2368	-0.368907	0.548427		16473	b2368	-0.2744	-1.36909
16475	b2370	-0.0105449	-0.0651728		16475	b2370	-0.0952552	-0.0651728		16475	b2370	-0.017671	-0.101713
16476	b2371	-0.204274	-0.87353		16476	b2371	0.00367134	-0.87353		16476	b2371	-0.119033	-0.551722
16477	b2372	-0.158061	-0.631516		16477	b2372	-0.284348	-0.631516		16477	b2372	-0.23872	-0.998718
16478	b2373	-0.187578	-1.15393		16478	b2373	0.092337	-1.15393		16478	b2373	-0.164439	-1.06362
16479	b2374	0.130081	0.796755		16479	b2374	0.0674994	0.796755		16479	b2374	0.155383	0.931136
16482	b2377	0.209656	0.415033		16482	b2377	-0.0681321	0.415033		16482	b2377	-0.0252435	-0.0372065
16483	b2378	0.123024	0.548884		16483	b2378	0.20153	0.548884		16483	b2378	-0.0167665	-0.0744045
16484	b2379	0.259223	1.18496		16484	b2379	0.250057	1.18496		16484	b2379	0.00710614	0.0348279
16485	b2380	0.118558	0.659583		16485	b2380	0.109607	0.659583		16485	b2380	-0.0754785	-0.430544
16486	b2381	0.287128	0.991748		16486	b2381	-0.0394551	0.991748		16486	b2381	0.181529	0.608586
16487	b2382	0.122328	0.719026		16487	b2382	-0.0058399	0.719026		16487	b2382	0.00787125	0.0383527
16488	b2383	-0.0445268	-0.298244		16488	b2383	0.0741451	-0.298244		16488	b2383	-0.0230044	-0.141083
16489	b2384	-0.305079	-1.65067		16489	b2384	-0.390499	-1.65067		16489	b2384	-0.188254	-0.921376
16490	b2385	0.381533	2.16259		16490	b2385	0.490005	2.16259		16490	b2385	0.20961	0.840982
16491	b2386	0.00164079	0.0101746		16491	b2386	-0.0104748	0.0101746		16491	b2386	0.0543339	0.336604
16492	b2387	0.0870195	0.231628		16492	b2387	0.185341	0.231628		16492	b2387	0.143435	0.468534
16493	b2388	-0.0513656	-0.277832		16493	b2388	-0.177052	-0.277832		16493	b2388	0.0660158	0.34879
16494	b2389	0.245681	1.45254		16494	b2389	0.124293	1.45254		16494	b2389	0.261515	1.47243
16495	b2390	0.0980712	0.332546		16495	b2390	-0.199052	0.332546		16495	b2390	-0.0200858	-0.0580125
16497	b2392	0.0802475	0.363716		16497	b2392	-0.356759	0.363716		16497	b2392	-0.144664	-0.677384
16498	b2393	0.169063	0.692779		16498	b2393	0.0183836	0.692779		16498	b2393	0.198339	0.771471
16500	b2395	-0.0189548	-0.134914		16500	b2395	0.133998	-0.134914		16500	b2395	0.202917	1.41414
16501	b2398	0.406644	0.943965		16501	b2398	0.131396	0.943965		16501	b2398	0.0761395	0.165655
16502	b2399	-0.229709	-0.695369		16502	b2399	-0.381554	-0.695369		16502	b2399	0.00430444	0.0143361
16504	b2405	0.0209986	0.113614		16504	b2405	0.0917289	0.113614		16504	b2405	0.0134632	0.0827797
16505	b2406	-0.0413478	-0.255391		16505	b2406	0.104265	-0.255391		16505	b2406	0.0799333	0.4586
16506	b2407	0.283259	1.50085		16506	b2407	0.310059	1.50085		16506	b2407	0.439213	2.24751
16507	b2408	0.170991	0.922882		16507	b2408	0.0163718	0.922882		16507	b2408	0.264477	1.27539
16508	b2409	0.0542663	0.197762		16508	b2409	0.238423	0.197762		16508	b2409	0.363538	1.25891
16509	b2410	-0.0998483	-0.430089		16509	b2410	0.0706322	-0.430089		16509	b2410	0.00738101	0.0227439
16512	b2413	-0.0217145	-0.117703		16512	b2413	0.113021	-0.117703		16512	b2413	0.0492393	0.225347
16513	b2414	-1.37821	-7.00584		16513	b2414	-1.80323	-7.00584		16513	b2414	-1.79311	-7.34008
16517	b2418	-0.204313	-1.14031		16517	b2418	-0.236363	-1.14031		16517	b2418	-0.217449	-0.994877
16518	b2419	0.130815	0.3139		16518	b2419	-0.218614	0.3139		16518	b2419	-0.0283602	-0.0706131
16519	b2420	0.351335	1.21272		16519	b2420	0.13743	1.21272		16519	b2420	0.0744104	0.284296
16520	b2421	-0.53576	-1.28564		16520	b2421	0.0475256	-1.28564		16520	b2421	-0.665951	-1.49981
16521	b2422	-0.527633	-2.67338		16521	b2422	-0.239324	-2.67338		16521	b2422	-0.495636	-2.6586
16524	b2425	-0.0491918	-0.234602		16524	b2425	0.138069	-0.234602		16524	b2425	-0.219479	-1.06687
16526	b2427	-0.241551	-0.969112		16526	b2427	-0.0109716	-0.969112		16526	b2427	-0.267063	-0.925238
16527	b2428	-0.210624	-0.941655		16527	b2428	-0.137151	-0.941655		16527	b2428	-0.145252	-0.438912
16528	b2429	-0.080248	-0.412314		16528	b2429	-0.0837044	-0.412314		16528	b2429	0.0714157	0.329762
16529	b2430	0.134208	0.621902		16529	b2430	0.118568	0.621902		16529	b2430	0.0413385	0.229013
16530	b2431	-0.1376	-0.672413		16530	b2431	0.12047	-0.672413		16530	b2431	-0.160322	-0.721398
16533	b2434	0.439377	1.27958		16533	b2434	0.0329554	1.27958		16533	b2434	0.142601	0.422808
16534	b2435	-0.415974	-1.55082		16534	b2435	-0.348289	-1.55082		16534	b2435	-0.459332	-1.13543
16535	b2436	-0.168449	-0.786375		16535	b2436	-0.173673	-0.786375		16535	b2436	0.173425	0.623962
16536	b2437	0.224217	1.02601		16536	b2437	0.157488	1.02601		16536	b2437	0.214293	1.05536
16537	b2438	-0.14205	-0.694163		16537	b2438	-0.364669	-0.694163		16537	b2438	-0.15475	-0.826856
16538	b2439	0.0829179	0.369346		16538	b2439	-0.121375	0.369346		16538	b2439	-0.44297	-1.76714
16539	b2440	-0.0206243	-0.110603		16539	b2440	0.0336569	-0.110603		16539	b2440	0.0729198	0.354337
16540	b2441	0.22674	1.17907		16540	b2441	0.478505	1.17907		16540	b2441	0.395515	2.02696
16541	b2442	0.126882	0.461661		16541	b2442	0.430144	0.461661		16541	b2442	0.189769	0.539414
16542	b2443	-0.038323	-0.116816		16542	b2443	0.179444	-0.116816		16542	b2443	0.0803086	0.272041
16544	b2445	0.271037	0.689577		16544	b2445	-0.833234	0.689577		16544	b2445	-0.173701	-0.287773
16546	b2447	0.0257709	0.099872		16546	b2447	0.289348	0.099872		16546	b2447	0.188948	0.845804
16547	b2448	-0.0104581	-0.0307435		16547	b2448	-0.559284	-0.0307435		16547	b2448	-0.0915309	-0.302544
16548	b2449	-0.286538	-1.09586		16548	b2449	-0.259302	-1.09586		16548	b2449	-0.276474	-0.741057
16550	b2451	-0.0756098	-0.348064		16550	b2451	-0.0970446	-0.348064		16550	b2451	0.106733	0.503097
16551	b2452	-0.261995	-1.7733		16551	b2452	-0.0629359	-1.7733		16551	b2452	-0.40814	-2.00295
16552	b2453	-0.119152	-0.751337		16552	b2453	-0.152045	-0.751337		16552	b2453	-0.0806258	-0.454848
16553	b2454	-0.107076	-0.417355		16553	b2454	-0.157773	-0.417355		16553	b2454	-0.079552	-0.357517
16554	b2455	0.100128	0.414476		16554	b2455	-0.24278	0.414476		16554	b2455	-0.190621	-0.728797
16555	b2456	-0.0523285	-0.128373		16555	b2456	0.163883	-0.128373		16555	b2456	0.052443	0.198803
16556	b2457	0.403385	1.24052		16556	b2457	0.0869563	1.24052		16556	b2457	0.0501051	0.159326
16557	b2458	0.27054	1.44854		16557	b2458	-0.387197	1.44854		16557	b2458	0.219616	1.11763
16558	b2459	0.644598	3.46634		16558	b2459	0.268507	3.46634		16558	b2459	0.543674	2.45351
16559	b2460	0.14618	0.649009		16559	b2460	0.167029	0.649009		16559	b2460	0.0971544	0.495269
16560	b2461	0.0483714	0.302915		16560	b2461	0.0335502	0.302915		16560	b2461	-0.138616	-0.731454
16561	b2462	-0.0449896	-0.276007		16561	b2462	0.052264	-0.276007		16561	b2462	0.0393729	0.199179
16562	b2463	0.0681622	0.350124		16562	b2463	-0.125004	0.350124		16562	b2463	-0.00503985	-0.0275259
16563	b2464	0.03651	0.225097		16563	b2464	-0.31174	0.225097		16563	b2464	0.0446342	0.224111
16564	b2465	0.140291	0.899278		16564	b2465	0.244359	0.899278		16564	b2465	0.0893615	0.576423
16565	b2466	-0.545903	-2.20837		16565	b2466	-0.482928	-2.20837		16565	b2466	-0.785199	-3.40602
16566	b2467	-0.145124	-0.528568		16566	b2467	-0.269648	-0.528568		16566	b2467	-0.17674	-0.612023
16567	b2468	0.184058	0.869344		16567	b2468	0.0269618	0.869344		16567	b2468	0.0580671	0.259855
16568	b2469	-0.0964704	-0.549393		16568	b2469	-0.0371731	-0.549393		16568	b2469	0.057774	0.337676
16569	b2470	-0.0460699	-0.332116		16569	b2470	-0.1155	-0.332116		16569	b2470	-0.0418649	-0.305359
16570	b2471	0.620475	2.36471		16570	b2471	-0.139554	2.36471		16570	b2471	-0.162887	-0.518151
16572	b2473	-0.000779391	-0.00365285		16572	b2473	-0.0551132	-0.00365285		16572	b2473	0.107103	0.480195
16573	b2474	0.0256914	0.152091		16573	b2474	-0.101722	0.152091		16573	b2474	0.0742688	0.43463
16574	b2475	-0.236069	-0.978187		16574	b2475	-0.26063	-0.978187		16574	b2475	-0.29838	-1.4304
16576	b2477	-0.117558	-0.367047		16576	b2477	-0.682625	-0.367047		16576	b2477	0.197553	0.510427
16578	b2479	-1.89441	-5.29751		16578	b2479	-3.28422	-5.29751		16578	b2479	-3.46409	-6.35044
16579	b2480	-0.263193	-0.882462		16579	b2480	-0.11022	-0.882462		16579	b2480	0.00900739	0.0276923
16580	b2481	-0.220363	-0.673737		16580	b2481	-0.64034	-0.673737		16580	b2481	-0.100661	-0.328697
16581	b2482	-0.00399586	-0.0229636		16581	b2482	-0.148583	-0.0229636		16581	b2482	-0.00224935	-0.0125571
16582	b2483	0.0644196	0.285627		16582	b2483	-0.0248058	0.285627		16582	b2483	-0.036795	-0.187948
16583	b2484	-0.289365	-1.42935		16583	b2484	-0.0662946	-1.42935		16583	b2484	-0.0814615	-0.408534
16584	b2485	-0.120784	-0.512044		16584	b2485	0.0281147	-0.512044		16584	b2485	-0.13608	-0.63832
16585	b2486	0.154607	0.670073		16585	b2486	0.136601	0.670073		16585	b2486	0.0576702	0.291655
16586	b2487	-0.0353207	-0.186093		16586	b2487	-0.119377	-0.186093		16586	b2487	-0.142866	-0.884754
16587	b2488	-0.049351	-0.102682		16587	b2488	-0.345323	-0.102682		16587	b2488	0.225319	0.420353
16588	b2489	0.391622	1.97001		16588	b2489	0.297276	1.97001		16588	b2489	0.404102	1.84717
16589	b2490	0.0543803	0.0895855		16589	b2490	-0.257778	0.0895855		16589	b2490	-0.292414	-0.596099
16590	b2491	0.171679	0.766005		16590	b2491	0.0475214	0.766005		16590	b2491	0.162835	0.895422
16591	b2492	0.12901	0.659143		16591	b2492	0.32534	0.659143		16591	b2492	0.185662	0.893072
16592	b2493	-0.00276105	-0.0124258		16592	b2493	-0.200192	-0.0124258		16592	b2493	-0.135851	-0.64341
16593	b2494	0.261082	1.10818		16593	b2494	0.211188	1.10818		16593	b2494	0.123157	0.627438
16594	b2495	-0.401821	-1.63541		16594	b2495	-0.243602	-1.63541		16594	b2495	-0.12668	-0.38547
16596	b2497	0.0872873	0.541145		16596	b2497	0.216052	0.541145		16596	b2497	-0.177404	-1.05424
16598	b2499	-0.441086	-1.16316		16598	b2499	-0.842363	-1.16316		16598	b2499	-1.07264	-2.06019
16599	b2500	0.461053	1.55406		16599	b2500	0.528423	1.55406		16599	b2500	-0.311456	-0.704353
16600	b2501	-1.28841	-2.50371		16600	b2501	-1.27825	-2.50371		16600	b2501	-1.58492	-3.26244
16601	b2502	-0.824564	-4.6045		16601	b2502	-0.36241	-4.6045		16601	b2502	-0.35255	-2.28129
16602	b2503	0.178352	0.922923		16602	b2503	0.102224	0.922923		16602	b2503	0.269116	1.57802
16604	b2505	0.0498645	0.202013		16604	b2505	-0.079088	0.202013		16604	b2505	0.029999	0.119631
16608	b2509	0.155071	0.774503		16608	b2509	0.188324	0.774503		16608	b2509	0.419066	1.93416
16609	b2510	0.140568	0.33648		16609	b2510	-0.214706	0.33648		16609	b2510	-0.0380034	-0.110336
16611	b2512	-0.0614668	-0.205232		16611	b2512	0.292461	-0.205232		16611	b2512	-0.197059	-0.750206
16612	b2513	-0.40321	-1.73905		16612	b2513	-0.41792	-1.73905		16612	b2513	0.150458	0.507621
16615	b2516	-0.158603	-0.615151		16615	b2516	0.00603563	-0.615151		16615	b2516	0.0765399	0.344549
16616	b2517	-0.348624	-1.63321		16616	b2517	-0.082433	-1.63321		16616	b2517	-0.143497	-0.805166
16618	b2519	-0.121134	-0.733804		16618	b2519	-0.0234238	-0.733804		16618	b2519	0.0217768	0.133159
16619	b2520	0.0636575	0.509076		16619	b2520	0.00674633	0.509076		16619	b2520	0.0399271	0.296878
16620	b2521	-0.587615	-3.38357		16620	b2521	-0.249005	-3.38357		16620	b2521	-0.124965	-0.704708
16621	b2522	-0.0879496	-0.653668		16621	b2522	-0.0268438	-0.653668		16621	b2522	0.0316486	0.235759
16622	b2523	-0.426515	-1.76602		16622	b2523	-0.389263	-1.76602		16622	b2523	-0.159685	-0.92385
16631	b2532	-0.916718	-1.68713		16631	b2532	-0.54195	-1.68713		16631	b2532	-0.358504	-1.20942
16633	b2534	-0.192126	-0.992425		16633	b2534	-0.0299252	-0.992425		16633	b2534	0.100484	0.461092
16634	b2535	-0.0275948	-0.182429		16634	b2535	-0.166019	-0.182429		16634	b2535	-0.160529	-1.12017
16635	b2536	0.0401886	0.170858		16635	b2536	0.172114	0.170858		16635	b2536	0.0621695	0.283535
16636	b2537	-0.273506	-1.41202		16636	b2537	-0.127718	-1.41202		16636	b2537	0.0359678	0.197798
16637	b2538	-0.0108385	-0.0536941		16637	b2538	-0.131771	-0.0536941		16637	b2538	-0.174239	-0.81934
16638	b2539	0.00171753	0.00477444		16638	b2539	0.368759	0.00477444		16638	b2539	-0.0831682	-0.263614
16639	b2540	-0.473955	-1.82768		16639	b2540	-0.018529	-1.82768		16639	b2540	-0.0308271	-0.119173
16640	b2541	-0.292015	-1.20607		16640	b2541	-0.587255	-1.20607		16640	b2541	-0.286698	-0.905697
16641	b2542	0.000890492	0.00439266		16641	b2542	0.151141	0.00439266		16641	b2542	-0.0285396	-0.112952
16642	b2543	-0.200783	-0.810221		16642	b2543	-0.161151	-0.810221		16642	b2543	-0.247328	-1.14223
16643	b2544	0.0858003	0.403322		16643	b2544	0.0351788	0.403322		16643	b2544	0.078587	0.448296
16644	b2545	-0.233008	-0.990255		16644	b2545	-0.0348251	-0.990255		16644	b2545	-0.293048	-1.16353
16645	b2546	0.171091	0.847615		16645	b2546	-0.0446645	0.847615		16645	b2546	0.132973	0.579861
16646	b2547	0.031321	0.175232		16646	b2547	-0.373038	0.175232		16646	b2547	-0.18473	-0.831443
16647	b2548	-0.196739	-0.986441		16647	b2548	-0.437271	-0.986441		16647	b2548	-0.422442	-2.00223
16648	b2549	0.138686	0.997755		16648	b2549	0.138285	0.997755		16648	b2549	0.174457	1.06278
16649	b2550	-0.0866139	-0.383955		16649	b2550	0.185077	-0.383955		16649	b2550	0.0728828	0.391824
16651	b2552	0.175053	1.01018		16651	b2552	-0.0636201	1.01018		16651	b2552	0.208504	1.18908
16652	b2553	-0.725971	-2.26085		16652	b2553	-0.769309	-2.26085		16652	b2553	-0.182523	-0.510987
16653	b2554	0.110566	0.541409		16653	b2554	0.150159	0.541409		16653	b2554	0.0486081	0.249725
16654	b2555	0.413376	1.9537		16654	b2555	-0.0409807	1.9537		16654	b2555	0.0653064	0.372425
16655	b2556	0.143641	0.800245		16655	b2556	0.0970935	0.800245		16655	b2556	0.189782	1.00867
16657	b2558	-0.190485	-1.21066		16657	b2558	-0.0786565	-1.21066		16657	b2558	-0.122069	-0.824478
16659	b2560	0.164065	0.843251		16659	b2560	0.152876	0.843251		16659	b2560	0.133515	0.702523
16660	b2561	0.0505229	0.226696		16660	b2561	-0.05754	0.226696		16660	b2561	-0.0323682	-0.165713
16661	b2562	-0.0561759	-0.233139		16661	b2562	-0.25302	-0.233139		16661	b2562	-0.19154	-0.770882
16663	b2564	0.586674	1.73352		16663	b2564	-0.323579	1.73352		16663	b2564	-0.0714145	-0.210073
16664	b2565	0.0598365	0.25847		16664	b2565	-0.051879	0.25847		16664	b2565	-0.185065	-0.569654
16669	b2570	-0.181452	-0.725847		16669	b2570	0.0357896	-0.725847		16669	b2570	-0.272283	-0.964272
16670	b2571	0.0618822	0.247752		16670	b2571	-0.316011	0.247752		16670	b2571	-0.47656	-2.52698
16671	b2572	0.348933	1.26341		16671	b2572	0.152013	1.26341		16671	b2572	-0.0100493	-0.0388421
16673	b2574	-0.143309	-0.767728		16673	b2574	-0.0787117	-0.767728		16673	b2574	-0.136659	-0.796971
16674	b2575	-0.197473	-0.938394		16674	b2575	-0.168663	-0.938394		16674	b2575	-0.286369	-1.49753
16676	b2577	-0.389296	-1.23085		16676	b2577	-0.460588	-1.23085		16676	b2577	-0.458716	-1.46151
16677	b2578	-0.287579	-1.4747		16677	b2578	-0.253111	-1.4747		16677	b2578	-0.319187	-1.29723
16679	b2580	-0.194005	-0.835338		16679	b2580	-0.530125	-0.835338		16679	b2580	-0.164621	-0.767921
16680	b2581	-0.169445	-1.14935		16680	b2581	-0.236078	-1.14935		16680	b2581	-0.10582	-0.637361
16681	b2582	-0.26661	-0.420718		16681	b2582	-0.711091	-0.420718		16681	b2582	-0.215107	-0.216529
16682	b2583	-0.308118	-1.60644		16682	b2583	-0.40187	-1.60644		16682	b2583	-0.434459	-2.19004
16683	b2584	-0.092492	-0.585236		16683	b2584	-0.0771911	-0.585236		16683	b2584	-0.0483636	-0.345676
16685	b2586	-0.467065	-1.43055		16685	b2586	-0.403432	-1.43055		16685	b2586	-0.431172	-1.66314
16686	b2587	-0.0698401	-0.291455		16686	b2587	0.144901	-0.291455		16686	b2587	-0.0378053	-0.14541
16687	b2592	-0.123169	-0.83859		16687	b2592	-0.0795462	-0.83859		16687	b2592	-0.213697	-1.49342
16688	b2593	-0.11257	-0.605168		16688	b2593	0.0774961	-0.605168		16688	b2593	-0.129426	-0.687312
16692	b2597	0.0806136	0.159976		16692	b2597	-0.198616	0.159976		16692	b2597	-0.974126	-1.61911
16694	b2599	-0.247114	-1.53842		16694	b2599	-0.256868	-1.53842		16694	b2599	-0.107095	-0.568513
16695	b2600	-0.228672	-1.05672		16695	b2600	-0.308716	-1.05672		16695	b2600	-0.118455	-0.492835
16696	b2601	0.239107	1.35533		16696	b2601	0.115623	1.35533		16696	b2601	-0.1137	-0.588672
16697	b2602	-0.0844087	-0.395307		16697	b2602	-0.0517819	-0.395307		16697	b2602	-0.277183	-1.42472
16698	b2603	-0.303282	-1.66491		16698	b2603	0.00595976	-1.66491		16698	b2603	-0.317268	-1.62942
16699	b2604	-0.00903619	-0.038538		16699	b2604	-0.0331133	-0.038538		16699	b2604	-0.127801	-0.61646
16700	b2605	-0.359669	-1.67915		16700	b2605	-0.109891	-1.67915		16700	b2605	-0.335762	-1.59569
16706	b2611	-0.284861	-1.42813		16706	b2611	-0.274566	-1.42813		16706	b2611	-0.541425	-2.77591
16711	b2617	-0.387079	-0.932092		16711	b2617	-0.00267194	-0.932092		16711	b2617	-0.256788	-0.761325
16712	b2618	0.0552054	0.100942		16712	b2618	-0.154755	0.100942		16712	b2618	0.0341388	0.0616498
16715	b2622	0.300259	1.61651		16715	b2622	0.105682	1.61651		16715	b2622	0.0834408	0.368011
16716	b2623	-0.204913	-0.498877		16716	b2623	0.16257	-0.498877		16716	b2623	0.351576	1.11382
16717	b2624	-0.194211	-0.836905		16717	b2624	-0.107093	-0.836905		16717	b2624	-0.37593	-1.65087
16719	b2626	-0.147515	-0.607363		16719	b2626	-0.183051	-0.607363		16719	b2626	0.0146425	0.0579349
16720	b2627	-0.131658	-0.822273		16720	b2627	-0.141232	-0.822273		16720	b2627	-0.170192	-1.1005
16721	b2628	-0.0145346	-0.0841994		16721	b2628	-0.0582407	-0.0841994		16721	b2628	0.0270005	0.141766
16722	b2629	0.0597378	0.292949		16722	b2629	-0.151288	0.292949		16722	b2629	-0.271252	-0.988948
16723	b2630	-0.0496257	-0.226276		16723	b2630	-0.143263	-0.226276		16723	b2630	-0.121386	-0.577869
16726	b2633	0.210707	0.836938		16726	b2633	0.318498	0.836938		16726	b2633	0.320383	1.50827
16727	b2634	0.202512	0.399268		16727	b2634	0.442952	0.399268		16727	b2634	0.193993	0.420698
16728	b2636	0.223862	1.08114		16728	b2636	0.367922	1.08114		16728	b2636	0.242397	1.4061
16729	b2637	0.0178075	0.0270426		16729	b2637	0.0203732	0.0270426		16729	b2637	0.29506	0.579254
16730	b2638	-0.0142022	-0.0501768		16730	b2638	0.1297	-0.0501768		16730	b2638	0.330665	1.17492
16732	b2641	-0.262938	-1.54021		16732	b2641	-0.135215	-1.54021		16732	b2641	-0.0671639	-0.426264
16734	b2643	0.139751	0.655772		16734	b2643	0.234764	0.655772		16734	b2643	0.0749692	0.283832
16735	b2644	0.155684	0.598899		16735	b2644	0.281492	0.598899		16735	b2644	0.100213	0.319124
16736	b2645	-0.111885	-0.371396		16736	b2645	-0.215304	-0.371396		16736	b2645	-0.137925	-0.46057
16738	b2647	0.0467154	0.402453		16738	b2647	0.0162128	0.402453		16738	b2647	0.00942488	0.080506
16739	b2648	-0.172006	-0.714622		16739	b2648	0.0349148	-0.714622		16739	b2648	-0.014648	-0.0779706
16750	b2660	-0.262147	-1.25765		16750	b2660	-0.326937	-1.25765		16750	b2660	-0.176966	-0.978733
16751	b2661	0.169688	0.787178		16751	b2661	0.205202	0.787178		16751	b2661	0.162637	0.758883
16752	b2662	-0.0839683	-0.370014		16752	b2662	0.0399502	-0.370014		16752	b2662	-0.0468428	-0.222019
16753	b2663	-0.122544	-0.960579		16753	b2663	0.0189631	-0.960579		16753	b2663	-0.2154	-1.59136
16754	b2664	0.182483	0.679552		16754	b2664	0.129258	0.679552		16754	b2664	0.233837	0.784395
16755	b2665	-0.318822	-1.68848		16755	b2665	0.162954	-1.68848		16755	b2665	-0.175724	-0.668055
16756	b2666	-0.143719	-0.673577		16756	b2666	0.109464	-0.673577		16756	b2666	-0.300289	-1.09858
16757	b2667	-0.268165	-1.53882		16757	b2667	0.260733	-1.53882		16757	b2667	0.19796	1.1414
16758	b2668	-0.201447	-0.926314		16758	b2668	-0.124727	-0.926314		16758	b2668	-0.0175967	-0.0843256
16759	b2669	-0.0736599	-0.443888		16759	b2669	-0.0445513	-0.443888		16759	b2669	-0.231563	-1.4664
16760	b2670	-0.318043	-1.32339		16760	b2670	0.0635256	-1.32339		16760	b2670	-0.0604292	-0.287391
16761	b2671	-0.0712443	-0.242271		16761	b2671	-0.00390491	-0.242271		16761	b2671	0.110239	0.439503
16762	b2672	0.191037	0.433889		16762	b2672	0.74347	0.433889		16762	b2672	0.456393	1.07588
16763	b2673	-0.130289	-0.299155		16763	b2673	0.255526	-0.299155		16763	b2673	-0.143435	-0.210721
16764	b2674	-0.343748	-1.36907		16764	b2674	-0.314974	-1.36907		16764	b2674	0.124527	0.575865
16765	b2675	0.078173	0.529423		16765	b2675	-0.198022	0.529423		16765	b2675	0.0349422	0.218751
16766	b2676	0.412438	1.80743		16766	b2676	0.496115	1.80743		16766	b2676	0.565069	2.90042
16767	b2677	-0.706527	-5.44505		16767	b2677	-1.06833	-5.44505		16767	b2677	-0.984244	-7.17829
16768	b2678	-0.531924	-2.75429		16768	b2678	-1.28203	-2.75429		16768	b2678	-1.03159	-4.36388
16769	b2679	-0.408359	-1.11		16769	b2679	-0.794582	-1.11		16769	b2679	-0.81988	-2.20436
16771	b2682	0.0536629	0.172558		16771	b2682	0.453432	0.172558		16771	b2682	0.0332381	0.1421
16772	b2683	0.322028	1.39544		16772	b2683	0.50328	1.39544		16772	b2683	0.206847	0.881033
16773	b2684	-0.0977629	-0.220216		16773	b2684	-0.580869	-0.220216		16773	b2684	-0.886441	-2.57186
16774	b2685	0.0875617	0.386256		16774	b2685	0.110019	0.386256		16774	b2685	0.0978139	0.481989
16775	b2686	-0.140844	-0.647449		16775	b2686	-0.0856108	-0.647449		16775	b2686	0.0440346	0.233581
16776	b2687	-0.0826262	-0.495376		16776	b2687	-0.164889	-0.495376		16776	b2687	0.118984	0.600601
16777	b2688	-0.053549	-0.204623		16777	b2688	0.285195	-0.204623		16777	b2688	-0.0315102	-0.119593
16778	b2689	-0.172168	-0.402483		16778	b2689	-0.164538	-0.402483		16778	b2689	-0.370237	-0.988162
16779	b2690	-0.280174	-1.4877		16779	b2690	-0.118879	-1.4877		16779	b2690	-0.0305264	-0.139558
16784	b2700	-0.186646	-0.603901		16784	b2700	-0.173142	-0.603901		16784	b2700	0.293811	1.51452
16785	b2701	-0.220775	-1.18213		16785	b2701	-0.200081	-1.18213		16785	b2701	-0.103967	-0.533006
16788	b2704	0.0768703	0.212187		16788	b2704	-0.419167	0.212187		16788	b2704	-0.639506	-1.51265
16789	b2705	0.231104	1.19184		16789	b2705	0.197355	1.19184		16789	b2705	0.0779976	0.331499
16790	b2706	0.312348	1.08642		16790	b2706	0.0283224	1.08642		16790	b2706	-0.239008	-0.752988
16791	b2707	-0.137289	-0.487265		16791	b2707	-0.193912	-0.487265		16791	b2707	-0.100115	-0.345911
16792	b2708	-0.0977892	-0.469175		16792	b2708	-0.0990453	-0.469175		16792	b2708	-0.121267	-0.484134
16793	b2709	-0.23046	-1.06088		16793	b2709	-0.358779	-1.06088		16793	b2709	-0.293105	-1.34255
16794	b2710	0.150273	0.910669		16794	b2710	0.183487	0.910669		16794	b2710	0.201742	1.16526
16795	b2711	-0.12829	-0.617542		16795	b2711	-0.134873	-0.617542		16795	b2711	-0.237436	-1.12547
16796	b2712	-0.0430827	-0.244235		16796	b2712	-0.0798138	-0.244235		16796	b2712	0.0505787	0.291501
16797	b2713	0.160783	0.938669		16797	b2713	0.0181466	0.938669		16797	b2713	0.18551	0.994494
16798	b2714	-0.181689	-0.879078		16798	b2714	-0.264399	-0.879078		16798	b2714	0.0548706	0.293803
16800	b2716	-0.107267	-0.447774		16800	b2716	-0.167372	-0.447774		16800	b2716	-0.122145	-0.655658
16801	b2717	-0.0636824	-0.295779		16801	b2717	-0.0493958	-0.295779		16801	b2717	-0.114061	-0.590076
16802	b2718	0.107677	0.605274		16802	b2718	0.425113	0.605274		16802	b2718	0.176357	0.756561
16803	b2719	0.284781	1.27892		16803	b2719	0.252917	1.27892		16803	b2719	0.0115633	0.0489634
16804	b2720	-0.0496284	-0.233851		16804	b2720	-0.0493441	-0.233851		16804	b2720	-0.0533014	-0.258313
16805	b2721	-0.164706	-1.13413		16805	b2721	-0.194276	-1.13413		16805	b2721	-0.0135169	-0.0801923
16806	b2722	0.0246762	0.115476		16806	b2722	-0.0801869	0.115476		16806	b2722	-0.112367	-0.389489
16807	b2723	-0.251648	-1.14669		16807	b2723	-0.109121	-1.14669		16807	b2723	0.0264626	0.135377
16808	b2724	0.0385974	0.126007		16808	b2724	-0.00046151	0.126007		16808	b2724	0.160776	0.481437
16809	b2725	-0.0973099	-0.299608		16809	b2725	0.0335636	-0.299608		16809	b2725	0.0716064	0.218395
16810	b2726	-0.346428	-0.925984		16810	b2726	-0.581055	-0.925984		16810	b2726	-0.382735	-1.10558
16811	b2727	0.0413618	0.189048		16811	b2727	-0.0857696	0.189048		16811	b2727	-0.239101	-0.994448
16812	b2728	-0.138154	-0.484852		16812	b2728	-0.113036	-0.484852		16812	b2728	-0.0838675	-0.298462
16813	b2729	0.0690317	0.300649		16813	b2729	0.180093	0.300649		16813	b2729	0.175629	0.841295
16814	b2730	-0.107914	-0.575169		16814	b2730	-0.0993275	-0.575169		16814	b2730	0.0353711	0.149967
16815	b2731	0.0464544	0.314501		16815	b2731	0.13816	0.314501		16815	b2731	0.205547	1.31788
16816	b2732	0.0863663	0.392654		16816	b2732	-0.299999	0.392654		16816	b2732	0.137027	0.464728
16817	b2733	-0.0142742	-0.110594		16817	b2733	0.0393729	-0.110594		16817	b2733	-0.0700203	-0.510115
16818	b2734	-0.642488	-1.25393		16818	b2734	-0.136426	-1.25393		16818	b2734	-1.05676	-2.46934
16819	b2735	-0.740909	-3.20965		16819	b2735	-0.565497	-3.20965		16819	b2735	-0.285046	-0.900684
16820	b2736	0.0628885	0.220837		16820	b2736	-0.041547	0.220837		16820	b2736	0.0430542	0.17665
16821	b2737	-0.363706	-1.82228		16821	b2737	-0.280576	-1.82228		16821	b2737	0.0746405	0.365632
16822	b2738	0.000244078	0.000708777		16822	b2738	-0.114723	0.000708777		16822	b2738	0.13418	0.56892
16823	b2739	0.169273	1.03344		16823	b2739	0.0581055	1.03344		16823	b2739	0.0951152	0.549371
16824	b2740	0.0288871	0.173498		16824	b2740	0.30849	0.173498		16824	b2740	0.142049	0.79971
16825	b2741	0.110615	0.693689		16825	b2741	1.0271	0.693689		16825	b2741	0.85499	6.25311
16826	b2742	-0.0966448	-0.646975		16826	b2742	-0.0795755	-0.646975		16826	b2742	0.180193	1.09414
16827	b2743	0.0716712	0.201865		16827	b2743	-0.253453	0.201865		16827	b2743	-0.103716	-0.261294
16828	b2744	0.0481321	0.237387		16828	b2744	-0.000692804	0.237387		16828	b2744	0.125686	0.669287
16829	b2745	-0.00745195	-0.0409869		16829	b2745	0.0683252	-0.0409869		16829	b2745	0.0598688	0.359992
16833	b2749	0.00828346	0.0428542		16833	b2749	0.0159799	0.0428542		16833	b2749	0.0682367	0.41078
16834	b2750	0.207425	0.961152		16834	b2750	-0.137999	0.961152		16834	b2750	-0.19514	-0.803765
16835	b2751	0.268893	1.02201		16835	b2751	0.0474687	1.02201		16835	b2751	0.00501106	0.0193698
16836	b2752	-0.0768865	-0.298101		16836	b2752	0.207974	-0.298101		16836	b2752	-0.182789	-0.649747
16837	b2753	0.11593	0.866781		16837	b2753	0.0561024	0.866781		16837	b2753	0.0330961	0.217644
16838	b2754	-0.775825	-1.81427		16838	b2754	0.0177826	-1.81427		16838	b2754	-0.254185	-0.431204
16839	b2755	-0.0850245	-0.408037		16839	b2755	0.0357258	-0.408037		16839	b2755	-0.0423358	-0.222347
16840	b2756	0.112127	0.639748		16840	b2756	0.336533	0.639748		16840	b2756	0.115846	0.642127
16841	b2757	-0.168527	-1.14086		16841	b2757	0.00436173	-1.14086		16841	b2757	-0.0538225	-0.346768
16842	b2758	0.06075	0.357741		16842	b2758	0.3073	0.357741		16842	b2758	0.0562871	0.254092
16843	b2759	-0.216536	-1.03343		16843	b2759	-0.136986	-1.03343		16843	b2759	0.20791	0.905346
16844	b2760	-0.168773	-1.20641		16844	b2760	0.0648803	-1.20641		16844	b2760	-0.0862852	-0.601268
16845	b2761	-0.0500564	-0.40842		16845	b2761	0.0200329	-0.40842		16845	b2761	-0.0415419	-0.327395
16846	b2762	-0.214886	-0.995153		16846	b2762	-2.20745	-0.995153		16846	b2762	-0.948875	-4.54414
16847	b2763	-0.124176	-0.711351		16847	b2763	-0.989034	-0.711351		16847	b2763	-0.598853	-3.06209
16848	b2764	-0.0536996	-0.333454		16848	b2764	-0.701535	-0.333454		16848	b2764	-0.194046	-1.16744
16849	b2765	0.0551169	0.158754		16849	b2765	0.146675	0.158754		16849	b2765	0.0235759	0.0649393
16850	b2766	0.026218	0.138084		16850	b2766	0.147614	0.138084		16850	b2766	0.141158	0.836796
16851	b2767	-0.241392	-0.831135		16851	b2767	-0.0903265	-0.831135		16851	b2767	-0.114357	-0.341133
16852	b2768	-0.384492	-1.61227		16852	b2768	-0.456073	-1.61227		16852	b2768	-0.487235	-1.28884
16853	b2769	-0.409384	-1.33857		16853	b2769	-0.551701	-1.33857		16853	b2769	-0.0556372	-0.209435
16854	b2770	-0.0361489	-0.140023		16854	b2770	0.179905	-0.140023		16854	b2770	0.148751	0.808057
16855	b2771	0.188257	0.923222		16855	b2771	-0.0133975	0.923222		16855	b2771	0.187014	0.986698
16858	b2774	-0.566845	-1.39793		16858	b2774	0.24128	-1.39793		16858	b2774	0.210025	0.350689
16859	b2775	-0.0253357	-0.159144		16859	b2775	-0.0228906	-0.159144		16859	b2775	0.0111316	0.0728311
16860	b2776	-0.0519685	-0.288764		16860	b2776	0.0287526	-0.288764		16860	b2776	-0.0201408	-0.112971
16861	b2777	0.136669	0.780852		16861	b2777	0.213137	0.780852		16861	b2777	0.0750907	0.48766
16862	b2778	-0.27953	-0.796729		16862	b2778	-0.705516	-0.796729		16862	b2778	-0.00414435	-0.0161291
16865	b2781	-0.0133411	-0.0513041		16865	b2781	-0.145787	-0.0513041		16865	b2781	-0.117443	-0.597026
16866	b2782	-0.40854	-0.879595		16866	b2782	-0.0983424	-0.879595		16866	b2782	-0.0572725	-0.135367
16867	b2783	-0.502059	-0.742308		16867	b2783	-0.534881	-0.742308		16867	b2783	-0.190751	-0.422916
16868	b2784	-0.862253	-4.12091		16868	b2784	-1.37811	-4.12091		16868	b2784	-1.65125	-7.56338
16869	b2785	-0.262162	-1.47289		16869	b2785	-0.208793	-1.47289		16869	b2785	-0.348152	-1.74426
16870	b2786	-0.144955	-1.27151		16870	b2786	-0.19549	-1.27151		16870	b2786	-0.21341	-1.85446
16871	b2787	0.332834	2.24399		16871	b2787	0.0970312	2.24399		16871	b2787	0.189576	0.903131
16872	b2788	-0.0196225	-0.105232		16872	b2788	-0.0437869	-0.105232		16872	b2788	-0.056292	-0.333277
16873	b2789	0.206092	1.45946		16873	b2789	0.156298	1.45946		16873	b2789	0.0883469	0.620019
16874	b2790	0.643592	2.11809		16874	b2790	0.179608	2.11809		16874	b2790	0.215516	0.648471
16875	b2791	0.0308065	0.170319		16875	b2791	-0.0404236	0.170319		16875	b2791	0.189821	1.1782
16876	b2792	-0.294121	-0.567197		16876	b2792	0.518757	-0.567197		16876	b2792	0.0424925	0.0799064
16877	b2793	0.054522	0.325907		16877	b2793	0.140568	0.325907		16877	b2793	0.00531398	0.0315026
16878	b2794	-0.195547	-1.00188		16878	b2794	0.155274	-1.00188		16878	b2794	0.134044	0.817025
16879	b2795	-0.0584965	-0.393545		16879	b2795	0.0727909	-0.393545		16879	b2795	0.119454	0.816005
16880	b2796	0.149957	1.06627		16880	b2796	0.16662	1.06627		16880	b2796	0.21974	1.56005
16881	b2797	0.246104	1.74734		16881	b2797	0.196488	1.74734		16881	b2797	0.2799	2.06212
16882	b2798	0.262808	0.907386		16882	b2798	0.297943	0.907386		16882	b2798	0.317509	1.01469
16883	b2799	0.190331	1.04101		16883	b2799	0.0868191	1.04101		16883	b2799	0.219486	1.30068
16884	b2800	-0.407447	-2.04601		16884	b2800	-0.0670076	-2.04601		16884	b2800	-0.0651561	-0.33648
16885	b2801	-0.144291	-0.892368		16885	b2801	0.130553	-0.892368		16885	b2801	-0.156737	-0.973547
16886	b2802	0.184509	1.07822		16886	b2802	0.0575622	1.07822		16886	b2802	0.133106	0.8822
16887	b2803	0.392504	1.94678		16887	b2803	0.12221	1.94678		16887	b2803	0.256695	1.39324
16889	b2805	-0.250421	-1.09115		16889	b2805	0.0619195	-1.09115		16889	b2805	-0.0884124	-0.546606
16890	b2806	-0.0692874	-0.400229		16890	b2806	0.12705	-0.400229		16890	b2806	0.108391	0.530485
16891	b2807	0.43383	1.67855		16891	b2807	-0.0704682	1.67855		16891	b2807	-0.0942233	-0.350541
16893	b2809	0.104243	0.317004		16893	b2809	-0.431602	0.317004		16893	b2809	0.711024	1.73577
16894	b2810	-0.259909	-1.36473		16894	b2810	-0.284045	-1.36473		16894	b2810	0.017415	0.0733562
16895	b2811	-0.587478	-2.04671		16895	b2811	-1.10697	-2.04671		16895	b2811	-0.591388	-1.52018
16896	b2812	-0.354096	-1.74139		16896	b2812	-0.143841	-1.74139		16896	b2812	0.0133126	0.0659653
16897	b2813	0.0966546	0.605878		16897	b2813	0.0758401	0.605878		16897	b2813	0.0143761	0.0870323
16898	b2817	-0.398253	-1.93004		16898	b2817	-0.0580936	-1.93004		16898	b2817	-0.103011	-0.563888
16899	b2818	0.128236	0.694256		16899	b2818	-0.0169679	0.694256		16899	b2818	0.228162	1.1035
16900	b2819	-0.000321554	-0.00195642		16900	b2819	0.00838293	-0.00195642		16900	b2819	0.114351	0.617062
16902	b2821	0.057451	0.408484		16902	b2821	-0.0752608	0.408484		16902	b2821	0.0253996	0.177833
16904	b2823	0.891558	3.7503		16904	b2823	0.446778	3.7503		16904	b2823	0.842993	2.31249
16905	b2824	-0.101148	-0.373848		16905	b2824	0.346822	-0.373848		16905	b2824	0.461855	1.21924
16906	b2825	-0.151319	-0.627034		16906	b2825	0.0311647	-0.627034		16906	b2825	-0.0974693	-0.446418
16907	b2826	-0.09352	-0.571403		16907	b2826	0.0203603	-0.571403		16907	b2826	0.280234	1.61219
16910	b2829	0.286435	2.29985		16910	b2829	0.706073	2.29985		16910	b2829	0.641393	4.93425
16912	b2831	0.111775	0.473233		16912	b2831	0.14158	0.473233		16912	b2831	-0.290001	-1.17149
16913	b2832	0.18115	0.851385		16913	b2832	0.0209726	0.851385		16913	b2832	0.215435	0.969539
16914	b2833	0.0635916	0.378827		16914	b2833	0.330821	0.378827		16914	b2833	0.17366	0.872119
16915	b2834	0.051443	0.316531		16915	b2834	-0.146878	0.316531		16915	b2834	-0.247453	-1.26315
16916	b2835	0.299995	1.79404		16916	b2835	0.190329	1.79404		16916	b2835	0.251435	1.41571
16917	b2836	-0.00591976	-0.0406516		16917	b2836	0.0145307	-0.0406516		16917	b2836	-0.134428	-0.881539
16918	b2837	-0.450971	-2.247		16918	b2837	-0.265582	-2.247		16918	b2837	-0.200765	-1.01173
16919	b2838	0.0913295	0.580169		16919	b2838	-0.119452	0.580169		16919	b2838	-0.0999196	-0.647409
16920	b2839	0.323692	1.39328		16920	b2839	0.190587	1.39328		16920	b2839	-0.0934087	-0.348634
16921	b2840	0.223358	0.703232		16921	b2840	0.427917	0.703232		16921	b2840	0.0954103	0.334488
16922	b2841	0.281074	1.68343		16922	b2841	0.246	1.68343		16922	b2841	0.190037	1.11199
16923	b2842	0.06448	0.469745		16923	b2842	0.0265743	0.469745		16923	b2842	0.0360398	0.240929
16924	b2843	0.000524162	0.00283461		16924	b2843	-0.0244165	0.00283461		16924	b2843	0.0421455	0.260129
16925	b2844	0.329026	2.27217		16925	b2844	0.158088	2.27217		16925	b2844	-0.0185954	-0.105459
16926	b2845	0.15196	1.17539		16926	b2845	0.186117	1.17539		16926	b2845	0.0532622	0.41829
16944	b2863	0.23696	1.69646		16944	b2863	0.147919	1.69646		16944	b2863	0.066565	0.474013
16945	b2865	0.0302093	0.187135		16945	b2865	-0.083758	0.187135		16945	b2865	-0.0249476	-0.144957
16946	b2866	0.345291	2.2456		16946	b2866	0.175621	2.2456		16946	b2866	0.215925	1.44894
16947	b2867	-0.101256	-0.317011		16947	b2867	0.242385	-0.317011		16947	b2867	-0.0497868	-0.1712
16948	b2868	0.274005	1.1565		16948	b2868	0.268414	1.1565		16948	b2868	0.332685	1.30406
16949	b2869	0.249387	1.93912		16949	b2869	0.17187	1.93912		16949	b2869	0.139119	1.01465
16951	b2871	-0.131795	-0.770041		16951	b2871	-0.123582	-0.770041		16951	b2871	-0.215521	-1.03413
[truncated: 1,301 more rows]

## Sheet: Filtered fitness alone
RB-TnSeq analysis of E. coli growth alone on 10% cheese curd agar, pH7
160 genes have been highlighted as important for E. coli's growth on 10% cheese curd agar. Here are the gene fitness value and associated t-score for each day for each of these 160 genes. Unsignificant fitness values are displayed with a gray font. To be significant a fitness values must be negative and associated to an absolute t-score value greater than 3
				Day 1		Day 2		Day 3
bNumber	gene_name	gene product	KEGG module	Fitness value	t-score	Fitness value	t-score	Fitness value	t-score
b3816	corA	Ni2+/Co2+/Mg2+ transporter		-2.27218	-10.7803	-2.36446	-9.28645	-2.79221	-11.1053
b3960	argH	argininosuccinate lyase	Amino acid metabolism	-0.827394	-6.05738	-1.86601	-9.30354	-1.99443	-10.4739
b2913	serA	phosphoglycerate dehydrogenase	Energy metabolism / Amino acid metabolism	-1.53641	-8.02039	-1.84671	-7.3932	-2.78182	-9.45529
b4388	serB	phosphoserine phosphatase	Energy metabolism / Amino acid metabolism	-2.40577	-8.85615	-2.22266	-6.31987	-3.41406	-9.21068
b0401	brnQ	branched chain amino acid transporter BrnQ		-2.41893	-10.1061	-2.09216	-9.63026	-2.01831	-9.1039
b2784	relA	GDP/GTP pyrophosphokinase	Nucleotides metabolism	-0.862253	-4.12091	-1.37811	-6.73286	-1.65125	-7.56338
b3005	exbD	Ton complex subunit ExbD		-1.45532	-4.91528	-1.31407	-4.04423	-2.28314	-7.49516
b2414	cysK	O-acetylserine sulfhydrylase A	Energy metabolism	-1.37821	-7.00584	-1.80323	-7.97694	-1.79311	-7.34008
b2677	proV	glycine betaine ABC transporter ATP binding subunit ProV	Membrane transport	-0.706527	-5.44505	-1.06833	-7.98023	-0.984244	-7.17829
b3849	trkH	K+ transporter		-0.894549	-4.56273	-0.809348	-4.24917	-1.31106	-7.05899
b0592	fepB	ferric enterobactin ABC transporter periplasmic binding protein	Membrane transport	-1.10877	-4.61619	-1.35205	-5.44548	-1.77509	-6.86327
b0584	fepA	ferric enterobactin outer membrane transporter	Signal transduction	-0.953028	-5.39691	-1.06041	-6.58017	-1.10472	-6.70489
b3803	hemX	conserved protein HemX	Metabolism of cofactors and vitamins	-0.866887	-4.96384	-1.08932	-6.3288	-0.993473	-6.51587
b2289	lrhA	DNA-binding transcriptional dual regulator LrhA		-0.984456	-6.18279	-1.05558	-6.45851	-1.02124	-6.48242
b2479	gcvR	putative transcriptional regulator GcvR	Biofilm formation	-1.89441	-5.29751	-3.28422	-5.6766	-3.46409	-6.35044
b3871	bipA	ribosome-dependent GTPase, ribosome assembly factor		-1.17358	-6.85574	-1.69874	-8.44453	-1.06049	-6.26761
b0311	betA	choline dehydrogenase		-1.16435	-6.90233	-0.745773	-4.26541	-0.933741	-6.10003
b3779	gpp	guanosine-5'-triphosphate,3'-diphosphate phosphatase	Nucleotides metabolism	-0.791902	-5.30598	-0.515587	-3.71418	-0.853323	-6.07569
b0907	serC	phosphoserine/phosphohydroxythreonine aminotransferase	Energy metabolism / Amino acid metabolism/ Metabolism of cofactors and vitamins	-1.42597	-4.27962	-1.56509	-4.98071	-2.53509	-5.98641
b0585	fes	enterochelin esterase		-1.91374	-4.651	-1.98285	-4.77944	-2.34856	-5.69295
b4313	fimE	regulator for fimA		-1.18028	-6.41362	-0.871954	-4.34697	-1.05758	-5.50485
b3781	trxA	thioredoxin 1		-2.21302	-5.9633	-2.1897	-3.45582	-2.34773	-5.42524
b0590	fepD	ferric enterobactin ABC transporter membrane subunit FebD	Membrane transport	-1.02336	-4.31734	-1.82349	-6.32519	-1.17269	-5.3752
b0619	dpiB	sensory histidine kinase DpiB		-1.17066	-5.63676	-1.18792	-5.55298	-1.20904	-5.3183
b3006	exbB	Ton complex subunit ExbB		-1.41993	-7.40233	-0.850261	-3.89552	-1.35074	-5.25392
b0149	mrcB	peptidoglycan glycosyltransferase / peptidoglycan DD-transpeptidase MrcB	Glycan biosynthesis and metabolism	-1.94928	-8.48945	-0.909236	-4.66237	-1.01506	-4.97965
b0759	galE	UDP-glucose 4-epimerase	Carbohydrate metabolism	-1.52655	-5.13953	-2.02532	-7.35837	-1.89618	-4.91202
b3652	recG	RecG DNA helicase	Replication and repair	-2.09959	-8.30757	-1.06935	-4.9223	-1.30679	-4.87218
b0588	fepC	ferric enterobactin ABC transporter ATP binding subunit	Membrane transport	-0.797163	-3.35651	-1.42016	-5.75538	-1.08598	-4.8017
b0314	betT	betaine aldehyde dehydrogenase		-0.861623	-4.83573	-0.664659	-3.96938	-0.762261	-4.59241
b2906	ubiI	2-octaprenylphenol hydroxylase	Metabolism of cofactors and vitamins	-1.76371	-5.05431	-1.05652	-3.14716	-1.38568	-4.42685
b0589	fepG	ferric enterobactin ABC transporter membrane subunit FepG	Membrane transport	-0.758271	-3.59492	-1.21334	-4.31291	-1.49183	-4.36586
b1856	mepM	peptidoglycan DD-endopeptidase		-1.39071	-5.87039	-1.21161	-5.85879	-0.89282	-3.92576
b0400	phoR	sensory histidine kinase PhoR		-0.696208	-3.02848	-0.974016	-4.40502	-0.765459	-3.01777
b3626	waaJ	UDP-glucose:(glucosyl)LPS alpha;-1,2-glucosyltransferase		-1.50068	-3.45657	-1.84	-3.46627	-1.26117	-2.9049
b3414	nfuA	iron-sulfur cluster insertion protein NfuA		-2.69851	-4.80486	-2.41114	-3.17394	-3.24123	-2.86601
b0428	cyoE	heme O synthase	Metabolism of cofactors and vitamins	-0.874532	-3.53818	-1.18738	-3.83339	-0.534509	-2.41502
b3387	dam	DNA adenine methyltransferase	Replication and repair	-0.969253	-5.71072	-0.707138	-3.77081	-0.370431	-2.13975
b0431	cyoB	cytochrome bo3 ubiquinol oxidase subunit I	Energy metabolism	-0.753041	-4.7816	-0.659384	-3.48782	-0.31227	-1.81114
b3210	arcB	sensory histidine kinase ArcB	Signal transduction	-1.15004	-3.50669	-1.16534	-3.27362	-0.407758	-1.63944
b3346	yheO	putative DNA-binding transcriptional regulator YheO		-0.511528	-3.41127	-0.652756	-3.25231	-0.164018	-0.8961
b3794	rffM	UDP-N-acetyl-D-mannosaminuronic acid transferase		-1.0058	-3.76971	-1.21572	-4.37363	-0.024763	-0.111202
b1232	purU	formyltetrahydrofolate deformylase	Carbohydrate metabolism / Metabolism of cofactors and vitamins	-1.15133	-3.98325	-0.520247	-2.24779	-1.32287	-5.14375
b0019	nhaA	Na+:H+ antiporter NhaA		-4.09118	-10.3913	-0.472402	-2.57271	-5.23033	-5.08751
b2312	purF	amidophosphoribosyltransferase	Nucleotides metabolism / Amino acids metabolism	-1.30564	-3.00575	-1.70342	-2.91914	-2.83703	-4.70496
b0676	nagC	DNA-binding transcriptional dual regulator NagC		-0.964893	-3.95566	-0.211784	-0.801773	-0.947507	-4.42194
b3398	yrfF	inner membrane protein - inhibits the Rcs signaling pathway		-2.88265	-5.21064	-2.05172	-2.59184	-1.8353	-4.2711
b0660	ybeZ	PhoH-like protein		-1.08782	-3.1712	-0.507526	-1.91294	-1.11228	-4.15362
b3617	kbl	2-amino-3-ketobutyrate CoA ligase	Amino acid metabolism	-0.79424	-3.08473	-0.520913	-2.39683	-0.97803	-3.76272
b3162	deaD	DEAD-box RNA helicase	Folding, sorting and degradation	-2.21975	-3.55004	-1.65891	-2.43468	-2.42651	-3.73558
b3032	cpdA	cAMP phosphodiesterase	Nucleotides metabolism	-0.703992	-3.37654	-0.334012	-1.94272	-0.728496	-3.63636
b0197	metQ	L-methionine/D-methionine ABC transporter membrane anchored binding protein	Membrane transport	-0.571683	-3.13709	-0.229783	-1.09016	-0.731351	-3.60279
b3965	trmA	tRNA m5U54 methyltransferase		-0.651651	-3.53575	-0.525143	-2.79535	-0.591225	-3.23201
b0141	yadN	putative fimbrial protein YadN		-0.789492	-3.0102	-0.734456	-2.73179	-0.842731	-3.19048
b3469	zntA	Zn2+/Cd2+>/Pb2+ exporting P-type ATPase		-1.4966	-3.85009	-0.933577	-2.11684	-1.3223	-3.07458
b3649	rpoZ	RNA polymerase subunit omega	Transcription / Nucleotides metabolism	-2.22941	-3.88303	-2.00453	-2.06007	-2.12071	-3.06003
b4174	hflK	regulator of FtsH protease		-0.813148	-3.89317	-0.707056	-2.98334	-0.553361	-2.71368
b1889	motB	motility protein B	Cell motility	-0.677143	-3.31994	-0.609144	-2.93731	-0.601859	-2.36928
b3630	waaP	lipopolysaccharide core heptose (I) kinase	Glycan biosynthesis and metabolism	-1.78205	-5.09463	-0.72455	-2.44175	-0.970625	-2.90541
b2278	nuoL	NADH:quinone oxidoreductase subunit L	Energy metabolism	-1.22803	-3.24474	-1.04954	-2.73229	-1.03098	-2.88607
b4480	hdfR	DNA-binding transcriptional dual regulator HdfR		-1.77087	-4.43207	-1.0713	-2.73487	-1.09879	-2.85389
b3631	waaG	lipopolysaccharide glucosyltransferase I	Glycan biosynthesis and metabolism	-0.60684	-3.06073	-0.457464	-2.23629	-0.659147	-2.80995
b4390	nadR	DNA-binding transcriptional repressor/NMN adenylyltransferase NadR	Metabolism of cofactors and vitamins	-0.560401	-3.14211	-0.317103	-1.60796	-0.486368	-2.50462
b2502	ppx	exopolyphosphatase	Nucleotides metabolism	-0.824564	-4.6045	-0.36241	-2.07271	-0.35255	-2.28129
b0632	dacA	D-alanyl-D-alanine carboxypeptidase DacA	Glycan biosynthesis and metabolism	-0.811008	-3.16208	-0.530725	-2.06914	-0.638977	-2.2687
b4208	cycA	serine/alanine/glycine/cycloserine:H<sup>+</sup>symporter		-0.643084	-4.00464	-0.489373	-2.88767	-0.350357	-2.15478
b3810	yigA	conserved protein YigA		-0.459251	-3.13621	-0.3834	-2.53573	-0.309172	-2.14981
b3996	nudC	NADH pyrophosphatase	Metabolism of cofactors and vitamins	-0.488871	-3.3047	-0.349672	-2.2951	-0.344627	-2.06111
b0092	ddlB	D-alanine ligase B	Glycan biosynthesis and metabolism / Metabolism of other amino acids	-0.936389	-3.62017	-0.068714	-0.308178	-0.393946	-1.96081
b4180	rlmB	23S rRNA 2'-O-ribose G2251 methyltransferase		-1.60585	-4.43943	-0.597448	-1.55436	-0.620853	-1.8708
b0046	kefF	regulator of KefC-mediated potassium transport and quinone oxidoreductase		-0.454309	-3.02602	-0.444031	-2.68209	-0.382056	-1.85926
b0427	yajR	putative major facilitator superfamily transport protein YajR		-0.625441	-3.53938	-0.60381	-2.82593	-0.281875	-1.69071
b4175	hflC	regulator of FtsH protease		-0.687987	-3.18728	-0.591635	-2.32718	-0.3781	-1.45699
b0432	cyoA	cytochrome bo3 ubiquinol oxidase subunit II	Energy metabolism	-0.567938	-3.28465	-0.419363	-2.36931	-0.237819	-1.38371
b3260	dusB	tRNA-dihydrouridine synthase B		-1.50272	-3.04964	-0.713245	-1.49591	-0.475698	-1.01982
b2735	ygbI	putative DeoR-type DNA-binding transcriptional regulator YgbI		-0.740909	-3.20965	-0.565497	-2.09808	-0.285046	-0.900684
b4111	proP	osmolyte:H+ symporter		-0.907601	-6.03269	0.0106744	0.0665154	-0.129692	-0.861544
b1109	ndh	NADH:quinone oxidoreductase II	Energy metabolism	-1.16709	-3.3841	-0.60485	-1.30793	-0.216463	-0.766806
b0460	hha	haemolysin expression modulating protein		-1.72656	-3.56462	-0.981813	-2.60435	-0.230772	-0.765429
b2521	mstA	3-mercaptopyruvate sulfurtransferase		-0.587615	-3.38357	-0.249005	-1.45179	-0.124965	-0.704708
b3753	rbsR	DNA-binding transcriptional dual regulator RbsR		-0.681465	-4.62066	-0.406333	-2.86659	-0.054881	-0.401369
b1072	flgA	flagellar basal body P-ring formation protein FlgA	Cell motility	-0.713903	-3.11067	0.255715	0.968158	-0.0551671	-0.177984
b1038	csgF	curli assembly component		-1.51354	-3.05014	-0.464528	-0.747779	0.0142381	0.0410377
b1233	ychJ	NTF2-like domain-containing protein YchJ		-0.83081	-3.13788	-0.0210642	-0.068343	0.193387	0.608812
b3181	greA	transcription elongation factor GreA		-1.13419	-3.99636	0.789346	3.18838	0.261676	0.843727
b2924	mscS	small conductance mechanosensitive channel MscS		-0.658306	-4.31688	-0.0767705	-0.49255	0.384806	2.49717
b4214	cysQ	3'(2'),5'-biphosphate nucleotidase	Energy metabolism	-0.211426	-1.34519	-3.92432	-13.8499	-0.820275	-4.82491
b2762	cysH	phosphoadenosine phosphosulfate reductase	Energy metabolism	-0.214886	-0.995153	-2.20745	-6.84842	-0.948875	-4.54414
b3802	hemY	putative protoheme IX synthesis protein		-0.347282	-2.47606	-0.843275	-5.33848	-0.461229	-3.24109
b2678	proW	glycine betaine ABC transporter membrane subunit ProW	Membrane transport	-0.531924	-2.75429	-1.28203	-4.84438	-1.03159	-4.36388
b3172	argG	argininosuccinate synthetase	Amino acid metabolism	-0.429402	-2.35444	-0.877697	-4.63858	-1.36855	-6.79736
b0212	gloB	hydroxyacylglutathione hydrolase GloB	Carbohydrate metabolism	-0.603465	-1.2786	-1.67576	-4.11957	-1.10691	-3.09895
b2763	cysI	sulfite reductase, hemoprotein subunit	Energy metabolism	-0.124176	-0.711351	-0.989034	-4.0876	-0.598853	-3.06209
b0364	yaiS	conserved protein YaiS		-0.313774	-0.963859	-2.22081	-3.91633	-2.0689	-4.93194
b3766	ilvL	ilvXGMEDA operon leader peptide		-0.87499	-2.12025	-1.50456	-3.9018	-1.1955	-3.40561
b0004	thrC	threonine synthase	Amino acid metabolism / Metabolism of cofactors and vitamins	-0.511263	-2.56689	-0.749114	-3.89268	-1.17542	-4.91111
b2501	ppk	polyphosphate kinase	Energy metabolism / Folding sorting and degradation	-1.28841	-2.50371	-1.27825	-3.68664	-1.58492	-3.26244
b3726	pstA	phosphate ABC transporter membrane subunit PstA	Membrane transport	-0.699714	-2.12747	-1.31483	-3.38271	-1.05765	-3.14206
b1192	ldcA	murein L,D-carboxypeptidase		-1.64523	-2.64778	-4.89881	-3.36492	-3.93441	-5.54328
b0723	sdhA	succinate:quinone oxidoreductase, FAD binding protein	Carbohydrate metabolism / Energy metabolism	-0.407231	-2.28005	-0.679355	-3.11087	-0.636007	-3.38634
b1830	prc	tail-specific protease		-0.67895	-2.47153	-0.8169	-3.14946	-0.741785	-2.99834
b3516	gadX	DNA-binding transcriptional dual regulator GadX		-0.269286	-1.95134	-0.489431	-3.08826	-0.479868	-2.89808
b4472	yhdP	AsmA2 domain-containing protein		-0.305037	-2.41518	-0.455342	-3.66207	-0.329483	-2.76757
b0430	cyoC	cytochrome bo3 ubiquinol oxidase subunit III	Energy metabolism	-0.771686	-2.21815	-1.46915	-3.91067	-1.00084	-2.72514
b3205	rapZ	RNase adaptor protein		-0.942381	-2.15393	-1.88742	-3.09296	-1.28974	-2.55592
b3366	nirD	nitrite reductase subunit NirD	Energy metabolism	-0.726675	-2.95481	-0.661306	-3.04015	-0.599353	-2.4266
b3349	slyD	FKBP-type peptidyl-prolyl cis-trans isomerase SlyD		-0.452159	-1.91882	-0.957992	-3.70838	-0.513185	-2.34638
b3247	rng	RNase G		-0.466814	-2.39654	-0.763453	-3.5022	-0.522115	-2.30525
b2085	yegR	uncharacterized protein YegR		-1.30038	-2.37452	-1.86639	-3.54694	-1.26011	-2.20895
b0758	galT	galactose-1-phosphate uridylyltransferase	Carbohydrate metabolism	-1.3084	-1.92759	-2.21265	-4.50868	-1.51037	-2.18624
b3232	zapE	cell division factor ZapE with ATPase activity		-0.199796	-1.18635	-0.519542	-3.18852	-0.342868	-2.04815
b0532	sfmD	putative fimbrial usher protein SfmD		-0.100086	-0.682329	-0.44191	-3.16558	-0.279689	-1.99847
b0484	copA	soluble Cu+ chaperone // "Cu+ exporting P-type ATPase"		-0.0639722	-0.440786	-0.464586	-3.2425	-0.268494	-1.8735
b3785	wzzE	enterobacterial common antigen polysaccharide co-polymerase		-0.287922	-2.19214	-0.388498	-3.02135	-0.257166	-1.84678
b1799	dmlR	DNA-binding transcriptional regulator DmlR		-0.871378	-2.11909	-1.17998	-3.63125	-0.795255	-1.84496
b4481	rffT	4-acetamidp-4,6-dideoxy-D-galactose transferase		-0.665925	-2.38138	-1.83058	-4.57903	-0.594714	-1.81374
b3429	glgA	glycogen synthase	Carbohydrate metabolism / Biofilm formation	-0.0131857	-0.098663	-0.451788	-3.1524	-0.252702	-1.79709
b1780	yeaD	conserved protein YeaD		-0.591675	-2.51267	-0.568979	-3.01632	-0.446354	-1.57552
b4209	ytfE	iron-sulfur cluster repair protein YtfE		-0.202785	-1.13128	-0.680398	-3.35596	-0.339101	-1.5424
b1745	astB	N-succinylarginine dihydrolase	Amino acid metabolism	-0.141377	-0.70517	-0.661586	-3.15607	-0.398916	-1.51209
b0478	ybaL	putative monovalent cation:proton antiporter-2 family transporter YbaL		-0.234738	-1.51021	-0.535479	-3.03821	-0.241976	-1.41729
b3259	prmA	methyltransferase for 5S ribosomal subunit protein L11		-0.345293	-0.971166	-1.15811	-3.26737	-0.4166	-1.22207
b1424	opgD	glucan biosynthesis protein D		-0.207981	-0.676053	-0.778601	-3.28735	-0.342561	-1.21481
b2764	cysJ	sulfite reductase, flavoprotein subunit	Energy metabolism	-0.0536996	-0.333454	-0.701535	-4.29241	-0.194046	-1.16744
b3787	wecC	UDP-N-acetyl-D-mannosamine dehydrogenase	Carbohydrate metabolism	-0.22694	-1.30305	-0.742726	-3.61677	-0.174454	-0.995052
b2099	yegU	putative ADP-ribosylglycohydrolase YegU		-0.280996	-1.10469	-0.613173	-3.19493	-0.147807	-0.782941
b4454	rdlD	antisense regulatory RNA RdlD		-0.457245	-1.54368	-0.907732	-3.50652	-0.13192	-0.603052
b1569	dicC	Qin prophage; DNA-binding transcriptional regulator for DicB		-0.229481	-0.862085	-1.22075	-4.09574	-0.163564	-0.447721
b4641	yoeH			-0.657689	-2.38749	-0.820307	-3.20721	-0.103107	-0.43208
b3368	cysG	siroheme synthase subunit	Metabolism of cofactors and vitamins	0.0988184	0.751434	-0.581085	-4.19475	0.00787319	0.057907
b3784	rfe	UDP-N-acetylglucosamine ; undecaprenyl-phosphate N-acetylglucosaminephosphotransferase		-0.168514	-1.10152	-0.555644	-3.45434	0.125718	0.819022
b2340	sixA	phosphohistidine phosphatase		-0.998642	-1.78798	-1.75592	-2.91798	-2.19536	-3.19784
b3289	rsmB	16S rRNA m5C967 methyltransferase		-0.507076	-2.77917	-0.508807	-2.74868	-0.791608	-4.30754
b2466	ypfG	DUF1176 domain-containing protein YpfG		-0.545903	-2.20837	-0.482928	-2.64963	-0.785199	-3.40602
b0033	carB	carbamoyl phosphate synthetase subunit beta	Nucleotides metabolism / Amino acids metabolism	-0.0739643	-0.53939	-0.33045	-2.54782	-0.44835	-3.26046
b3773	ilvY	DNA-binding transcriptional dual regulator IlvY		-0.353764	-2.3601	-0.386176	-2.49734	-0.567925	-3.68047
b0243	proA	glutamate-5-semialdehyde dehydrogenase	Amino acid metabolism / Biosynthesis of other secondary metabolites	-0.291995	-1.41733	-0.462044	-2.21625	-0.723769	-3.52804
b3772	ilvA	threonine deaminase	Amino acid metabolism	-0.195913	-1.51196	-0.308565	-2.14921	-0.656928	-4.67543
b3389	aroB	3-dehydroquinate synthase	Amino acid metabolism	-0.51798	-2.8441	-0.400887	-2.1053	-0.769532	-3.87183
b4654	yjdQ			-0.492916	-2.19212	-0.566215	-2.02722	-0.775643	-3.06634
b3966	btuB	cobalamin/cobinamide outer membrane transporter		-0.255613	-1.91203	-0.264812	-1.9303	-0.485749	-3.79887
b1991	cobT	nicotinate-nucleotide ; dimethylbenzimidazole phosphoribosyltransferase	Metabolism of cofactors and vitamins	-0.318756	-1.52905	-0.416793	-1.74825	-0.780032	-3.32851
b1693	aroD	3-dehydroquinate dehydratase	Amino acid metabolism	-0.649246	-2.70555	-0.529254	-1.74218	-1.32643	-4.43172
b0928	aspC	aspartate aminotransferase	Amino acid metabolism / Biosynthesis of other secondary metabolites	-0.470488	-1.67489	-0.539441	-1.64602	-1.20135	-3.85097
b0061	araD	L-ribulose-5-phosphate 4-epimerase AraD	Carbohydrate metabolism	-0.458046	-2.13303	-0.369291	-1.56005	-0.634703	-3.20855
b0078	ilvH	acetolactate synthase / acetohydroxybutanoate synthase, regulatory subunit	Amino acid metabolism	-0.340043	-2.14088	-0.316264	-1.50687	-0.96503	-4.78445
b0406	tgt	tRNA-guanine transglycosylase		-1.03542	-2.13314	-0.74351	-1.40377	-1.42397	-3.59113
b3939	metB	O-succinylhomoserine(thiol)-lyase / O-succinylhomoserine lyase	Energy metabolism / Amino acid metabolism / Metabolism of other amino acids	-0.179961	-1.11003	-0.206661	-1.36708	-0.769029	-5.07214
b0226	dinJ	antitoxin/DNA-binding transcriptional repressor DinJ		-0.146467	-0.474963	-0.738741	-1.35665	-1.20144	-3.35945
b3008	metC	cystathionine-beta-lyase / L-cysteine desulfhydrase	Amino acid metabolism / Metabolism of other amino acids	-0.176636	-1.04798	-0.231717	-1.22241	-0.773201	-4.28124
b0826	moeB	molybdopterin-synthase adenylyltransferase	Folding, sorting and degradation	-0.406361	-1.94038	-0.224994	-0.945504	-0.688738	-3.47528
b2557	purL	phosphoribosylformylglycinamide synthetase	Nucleotides metabolism	-0.0828819	-0.376518	-0.20761	-0.904268	-0.933052	-3.54268
b0693	speF	ornithine decarboxylase, degradative	Amino acid metabolism / Metabolism of other amino acids	-0.461233	-2.57997	-0.143195	-0.85967	-0.557142	-3.2955
b4005	purD	phosphoribosylamine-glycine ligase	Nucleotides metabolism	-0.658359	-2.71739	-0.159064	-0.593456	-1.22688	-3.77192
b0002	thrA	fused aspartate kinase/homoserine dehydrogenase 1	Amino acid metabolism / Biosynthesis of other secondary metabolites	-0.0988911	-0.686283	-0.0835042	-0.578983	-0.717416	-4.82435
b0077	ilvI	acetolactate synthase / acetohydroxybutanoate synthase, catalytic subunit	Amino acid metabolism / Metabolism of cofactors and vitamins	-0.171552	-0.960192	-0.0788917	-0.440164	-0.702072	-4.17466
b3771	ilvD	dihydroxy-acid dehydratase	Amino acid metabolism / Metabolism of cofactors and vitamins	-0.30448	-2.24691	0.00536397	0.0374483	-0.817596	-5.78127
b3770	ilvE	branched-chain-amino-acid aminotransferase	Amino acid metabolism	-0.186611	-1.1756	0.0191062	0.123998	-0.861821	-5.03208
b0312	betB	betaine aldehyde dehydrogenase	Amino acid metabolism	-0.653585	-2.95699	-0.456449	-2.64646	-0.700324	-3.25326
b3774	ilvC	ketol-acid reductoisomerase (NADP+)	Amino acid metabolism / Metabolism of cofactors and vitamins	-0.208615	-1.48701	-0.240724	-1.7657	-1.10167	-7.71734
