# Supplementary material for: Changes in the genetic requirements for microbial interactions with increasing community complexity
Source: eLife journal article supplement (doi:10.7554/elife.37072), 2018-09-13
Supplement: supp [file elife_poa_e37072_Figure_4_source_data_1.xlsx]

## Sheet: Raw data 
Raw data - Differential expression analysis, log of FC and adjusted p-values - Pairwise conditions versus growth alone and Community versus alone, Day1 day2 and day 3
with H. alvei versus growth alone																with G. candidum versus growth alone																with P. camemberti versus growth alone																with community versus growth alone
Day1					Day2					Day3						Day1					Day2					Day3						Day1					Day2					Day3						Day1
Gene name	bNumber	log2FC	adj-pvalue		Gene name	bNumber	log2FC	adj-pvalue		Gene name	bNumber	log2FC	adj-pvalue			Gene name	bNumber	log2FC	adj-pvalue		Gene name	bNumber	log2FC	adj-pvalue		Gene name	bNumber	log2FC	adj-pvalue			Gene name	bNumber	log2FC	adj-pvalue		Gene name	bNumber	log2FC	adj-pvalue		Gene name	bNumber	log2FC	adj-pvalue			Gene name	bNumber
aaaD		-2.40403	0.397871		aaaD		-1.66498	0.614902		aaaD		-0.887459	NA			aaaD		-1.88999	0.461087		aaaD		0.516179	0.857268		aaaD		1.22292	NA			aaaD		-1.51013	0.526954		aaaD		0.617933	NA		aaaD		1.12516	NA			aaaD
aaaE	b1149	0.251692	0.85977		aaaE	b1149	3.06142	0.00145086		aaaE	b1149	0.707166	0.518388			aaaE	b1149	-0.205193	0.867991		aaaE	b1149	1.95635	0.0716776		aaaE	b1149	1.28985	0.236989			aaaE	b1149	-0.73237	0.514629		aaaE	b1149	1.33721	0.261137		aaaE	b1149	-1.20675	0.29291			aaaE	b1149
aaeA	b3241	-0.559781	0.550529		aaeA	b3241	0.875172	0.217572		aaeA	b3241	-0.758965	0.22443			aaeA	b3241	-0.651573	0.373712		aaeA	b3241	0.560795	0.459097		aaeA	b3241	0.300092	0.720278			aaeA	b3241	-0.318406	0.682327		aaeA	b3241	0.0876542	0.930107		aaeA	b3241	-0.926414	0.14969			aaeA	b3241
aaeB	b3240	0.501616	0.42648		aaeB	b3240	0.514432	0.386214		aaeB	b3240	-0.270379	0.611197			aaeB	b3240	0.412675	0.446209		aaeB	b3240	0.61856	0.246541		aaeB	b3240	0.322536	0.58322			aaeB	b3240	-0.122418	0.852598		aaeB	b3240	0.26231	0.692302		aaeB	b3240	-0.714844	0.131392			aaeB	b3240
aaeR	b3243	0.256536	0.748928		aaeR	b3243	-0.0302403	0.976106		aaeR	b3243	-0.401182	0.547089			aaeR	b3243	0.396645	0.53167		aaeR	b3243	-0.158961	0.856461		aaeR	b3243	-0.27487	0.735829			aaeR	b3243	-0.511639	0.439832		aaeR	b3243	-0.100204	0.913048		aaeR	b3243	-0.339127	0.635058			aaeR	b3243
aaeX	b3242	0.410002	0.799019		aaeX	b3242	0.75352	0.451724		aaeX	b3242	0.931397	0.286211			aaeX	b3242	-0.414753	0.76567		aaeX	b3242	0.528326	0.602353		aaeX	b3242	0.340295	0.823856			aaeX	b3242	0.169545	0.898254		aaeX	b3242	0.757238	0.413001		aaeX	b3242	0.669648	0.5004			aaeX	b3242
aas	b2836	0.263548	0.628107		aas	b2836	0.624742	0.218691		aas	b2836	-0.276846	0.60508			aas	b2836	-0.0250439	0.970285		aas	b2836	0.475589	0.362442		aas	b2836	0.0561397	0.936561			aas	b2836	0.228469	0.678668		aas	b2836	0.531982	0.313565		aas	b2836	-0.260385	0.631708			aas	b2836
aat	b0885	1.47115	0.0151067		aat	b0885	0.48878	0.542511		aat	b0885	-0.617837	0.344898			aat	b0885	1.29125	0.0231805		aat	b0885	0.858554	0.200585		aat	b0885	0.535468	0.47282			aat	b0885	0.821998	0.191886		aat	b0885	0.154755	0.868662		aat	b0885	-0.059948	0.944904			aat	b0885
abgA	b1338	0.624231	0.594524		abgA	b1338	-0.581159	0.667283		abgA	b1338	-0.088133	0.948085			abgA	b1338	0.555556	0.581071		abgA	b1338	0.544546	0.633301		abgA	b1338	0.962123	0.346219			abgA	b1338	0.446103	0.67858		abgA	b1338	1.66964	0.0474079		abgA	b1338	0.589025	0.559193			abgA	b1338
abgB	b1337	-0.631642	0.403202		abgB	b1337	-0.143642	0.882658		abgB	b1337	-1.00628	0.0859197			abgB	b1337	-0.679258	0.284602		abgB	b1337	0.0996271	0.919016		abgB	b1337	-0.78629	0.282759			abgB	b1337	-0.91819	0.130605		abgB	b1337	0.607519	0.397796		abgB	b1337	-0.832836	0.181326			abgB	b1337
abgR	b1339	0.488579	0.557004		abgR	b1339	-0.703181	0.382126		abgR	b1339	-1.56758	0.00890366			abgR	b1339	0.180105	0.828596		abgR	b1339	1.57577	0.0107401		abgR	b1339	-0.454165	0.576483			abgR	b1339	0.818988	0.223687		abgR	b1339	2.1061	0.000229497		abgR	b1339	0.639331	0.345258			abgR	b1339
abgT	b1336	0.134466	0.904839		abgT	b1336	0.0259834	0.98413		abgT	b1336	-0.241044	0.783485			abgT	b1336	-0.840455	0.302194		abgT	b1336	0.0337947	0.978099		abgT	b1336	0.468345	0.619302			abgT	b1336	-0.309152	0.723568		abgT	b1336	0.840018	0.250121		abgT	b1336	-0.0920717	0.924562			abgT	b1336
abrB	b0715	0.523825	0.463593		abrB	b0715	-0.348458	0.674594		abrB	b0715	-0.20807	0.773835			abrB	b0715	0.395333	0.532224		abrB	b0715	-0.491885	0.482623		abrB	b0715	-0.477843	0.573829			abrB	b0715	0.353215	0.594044		abrB	b0715	-0.207406	0.802203		abrB	b0715	-0.383549	0.582942			abrB	b0715
accA	b0185	0.881814	0.00048112		accA	b0185	0.217194	0.555408		accA	b0185	-0.0684193	0.858414			accA	b0185	0.811474	0.000892288		accA	b0185	0.428776	0.16172		accA	b0185	0.257377	0.442623			accA	b0185	0.756474	0.00247471		accA	b0185	0.385103	0.223976		accA	b0185	-0.224761	0.485187			accA	b0185
accB	b3255	2.11315	0.000977341		accB	b3255	1.17608	0.130131		accB	b3255	2.05778	0.00177986			accB	b3255	1.98483	0.00148399		accB	b3255	1.2336	0.10209		accB	b3255	1.82807	0.00910848			accB	b3255	1.8693	0.00385771		accB	b3255	0.384547	0.71019		accB	b3255	1.62611	0.0159134			accB	b3255
accC	b3256	1.59712	0.0398975		accC	b3256	1.03204	0.26793		accC	b3256	1.62326	0.0377459			accC	b3256	1.61436	0.0288607		accC	b3256	1.00714	0.267287		accC	b3256	1.71047	0.0345448			accC	b3256	1.32824	0.0959569		accC	b3256	-0.115532	0.930107		accC	b3256	1.17715	0.152979			accC	b3256
accD	b2316	1.08255	0.041762		accD	b2316	0.212143	0.785216		accD	b2316	0.0044574	0.99558			accD	b2316	1.76902	0.000194684		accD	b2316	0.55914	0.385708		accD	b2316	0.120844	0.8787			accD	b2316	1.32065	0.00921828		accD	b2316	0.16782	0.846168		accD	b2316	1.11468	0.033076			accD	b2316
aceA	b4015	0.427217	0.578663		aceA	b4015	0.863019	0.243248		aceA	b4015	1.80046	0.00256237			aceA	b4015	1.114	0.0648298		aceA	b4015	0.673537	0.37318		aceA	b4015	2.7315	2.45564e-06			aceA	b4015	1.02568	0.111458		aceA	b4015	1.73166	0.00540021		aceA	b4015	2.35997	3.25015e-05			aceA	b4015
aceB	b4014	0.707103	0.343599		aceB	b4014	1.13141	0.122065		aceB	b4014	1.89576	0.00239801			aceB	b4014	1.47199	0.0161649		aceB	b4014	1.10268	0.127702		aceB	b4014	2.341	0.000175765			aceB	b4014	1.15488	0.0827222		aceB	b4014	1.85968	0.00397777		aceB	b4014	2.71065	3.964e-06			aceB	b4014
aceE	b0114	0.0355417	0.961055		aceE	b0114	-0.241064	0.756912		aceE	b0114	1.79645	0.000438255			aceE	b0114	0.981457	0.0614358		aceE	b0114	-0.917479	0.127858		aceE	b0114	2.08819	4.83433e-05			aceE	b0114	0.316003	0.649046		aceE	b0114	0.193314	0.827209		aceE	b0114	2.00662	5.07159e-05			aceE	b0114
aceF	b0115	0.266927	0.754778		aceF	b0115	0.193779	0.843239		aceF	b0115	1.7423	0.00401349			aceF	b0115	1.32653	0.025722		aceF	b0115	-0.741468	0.318111		aceF	b0115	1.50861	0.0184061			aceF	b0115	0.540103	0.472233		aceF	b0115	0.12371	0.905539		aceF	b0115	1.54111	0.0113667			aceF	b0115
aceK	b4016	0.533562	0.416416		aceK	b4016	0.769452	0.243753		aceK	b4016	1.18017	0.0338752			aceK	b4016	0.945369	0.0816496		aceK	b4016	0.622517	0.35313		aceK	b4016	1.33834	0.0185087			aceK	b4016	0.799026	0.178038		aceK	b4016	0.972973	0.116005		aceK	b4016	1.56118	0.00308281			aceK	b4016
ackA	b2296	0.613918	0.199272		ackA	b2296	-0.0524608	0.94261		ackA	b2296	0.43209	0.396078			ackA	b2296	0.335852	0.486108		ackA	b2296	0.603548	0.232027		ackA	b2296	1.51099	0.000342534			ackA	b2296	0.381697	0.464429		ackA	b2296	-0.325323	0.595488		ackA	b2296	0.637831	0.172797			ackA	b2296
acnA	b1276	-0.703545	0.24064		acnA	b1276	0.518745	0.456271		acnA	b1276	1.70765	0.000861323			acnA	b1276	-0.978002	0.0616785		acnA	b1276	-0.153159	0.857268		acnA	b1276	1.45537	0.00752334			acnA	b1276	-0.299733	0.667186		acnA	b1276	1.12952	0.050213		acnA	b1276	1.30116	0.0132625			acnA	b1276
acnB	b0118	0.0929478	0.905397		acnB	b0118	0.343415	0.642705		acnB	b0118	1.90216	0.000125938			acnB	b0118	0.449021	0.435199		acnB	b0118	-1.25321	0.022643		acnB	b0118	1.40865	0.0088277			acnB	b0118	0.381157	0.5616		acnB	b0118	0.514451	0.456645		acnB	b0118	2.01762	3.19581e-05			acnB	b0118
acpH	b0404	-0.654333	0.210326		acpH	b0404	0.443158	0.462406		acpH	b0404	-0.101811	0.878806			acpH	b0404	-0.962076	0.0289773		acpH	b0404	-0.178907	0.800464		acpH	b0404	-0.0854781	0.913992			acpH	b0404	-1.17574	0.00572142		acpH	b0404	-0.252067	0.714766		acpH	b0404	-0.3179	0.589746			acpH	b0404
acpP	b1094	0.329631	0.54671		acpP	b1094	0.157135	0.812793		acpP	b1094	-0.043985	0.951541			acpP	b1094	0.648516	0.144491		acpP	b1094	0.366087	0.517702		acpP	b1094	-0.580114	0.254146			acpP	b1094	0.458524	0.370075		acpP	b1094	-1.16212	0.00970289		acpP	b1094	-0.755052	0.101249			acpP	b1094
acpS	b2563	2.08328	0.000191038		acpS	b2563	1.01747	0.161247		acpS	b2563	1.24923	0.0494592			acpS	b2563	1.39991	0.0127659		acpS	b2563	0.425325	0.611734		acpS	b2563	-0.567185	0.699672			acpS	b2563	1.22847	0.02898		acpS	b2563	0.931369	0.160328		acpS	b2563	1.66301	0.00729214			acpS	b2563
acpT	b3475	1.25777	0.00623733		acpT	b3475	0.791138	0.136074		acpT	b3475	0.275046	0.638032			acpT	b3475	1.12388	0.010399		acpT	b3475	0.291151	0.649382		acpT	b3475	-0.331679	0.62043			acpT	b3475	1.18089	0.00725356		acpT	b3475	0.172255	0.815588		acpT	b3475	-0.022589	0.975234			acpT	b3475
acrA	b0463	0.949904	0.0986028		acrA	b0463	0.10192	0.909941		acrA	b0463	0.0681037	0.940336			acrA	b0463	0.957105	0.0749947		acrA	b0463	0.910886	0.139166		acrA	b0463	0.497784	0.465149			acrA	b0463	1.1034	0.045328		acrA	b0463	0.0991	0.916434		acrA	b0463	-0.151058	0.843776			acrA	b0463
acrB	b0462	-0.15491	0.827622		acrB	b0462	-0.558668	0.369769		acrB	b0462	-0.481315	0.408736			acrB	b0462	-0.57454	0.268284		acrB	b0462	0.283404	0.681932		acrB	b0462	-0.325159	0.615063			acrB	b0462	-0.207139	0.758203		acrB	b0462	-0.766187	0.184229		acrB	b0462	-0.995576	0.0471785			acrB	b0462
acrD	b2470	0.447845	0.365756		acrD	b2470	-0.196781	0.748545		acrD	b2470	-0.117919	0.83817			acrD	b2470	-0.155168	0.764336		acrD	b2470	0.866791	0.0428814		acrD	b2470	0.81945	0.0666839			acrD	b2470	-0.400276	0.397753		acrD	b2470	0.0649933	0.922505		acrD	b2470	-0.39662	0.414429			acrD	b2470
acrE	b3265	-1.19111	0.557383		acrE	b3265	-0.62521	0.722071		acrE	b3265	-0.397536	0.783744			acrE	b3265	0.486101	0.731426		acrE	b3265	0.255663	0.884502		acrE	b3265	-0.477819	0.791672			acrE	b3265	-1.00726	0.483865		acrE	b3265	0.216986	0.902899		acrE	b3265	-0.607895	0.670746			acrE	b3265
acrF	b3266	0.20929	0.805275		acrF	b3266	-0.309741	0.690376		acrF	b3266	-0.956511	0.0692087			acrF	b3266	0.213676	0.755255		acrF	b3266	-0.129697	0.880032		acrF	b3266	-0.876096	0.183833			acrF	b3266	-0.118055	0.879564		acrF	b3266	-0.298415	0.698016		acrF	b3266	-0.956521	0.0804895			acrF	b3266
acrR	b0464	0.89605	0.25128		acrR	b0464	1.19138	0.0739975		acrR	b0464	0.799798	0.219851			acrR	b0464	1.27777	0.0398856		acrR	b0464	1.67907	0.00596084		acrR	b0464	1.2305	0.0657928			acrR	b0464	1.5681	0.0083998		acrR	b0464	0.995666	0.138656		acrR	b0464	0.874696	0.177365			acrR	b0464
acrS	b3264	5.9366	0.0126669		acrS	b3264	1.38638	0.663274		acrS	b3264	0.694404	NA			acrS	b3264	5.22684	0.024076		acrS	b3264	1.80161	0.498713		acrS	b3264	1.0296	NA			acrS	b3264	4.59471	0.0591499		acrS	b3264	-1.43368	NA		acrS	b3264	3.39847	NA			acrS	b3264
acrZ	b0762	-0.331475	0.818315		acrZ	b0762	-1.81947	0.0815377		acrZ	b0762	-1.57686	0.106717			acrZ	b0762	-1.02831	0.333252		acrZ	b0762	0.000859843	0.999059		acrZ	b0762	-0.911425	0.441953			acrZ	b0762	-0.430209	0.737799		acrZ	b0762	-1.53422	0.141343		acrZ	b0762	0.202966	0.879149			acrZ	b0762
acs	b4069	-0.485148	0.733057		acs	b4069	-0.620746	0.68405		acs	b4069	2.46838	0.020577			acs	b4069	-2.53189	0.0111227		acs	b4069	0.106991	0.95665		acs	b4069	4.75127	2.22275e-06			acs	b4069	0.381992	0.7891		acs	b4069	-1.82687	0.128082		acs	b4069	4.40287	6.07594e-06			acs	b4069
actP	b4067	-1.47857	0.206972		actP	b4067	-1.35642	0.305467		actP	b4067	0.282423	0.855823			actP	b4067	-3.70244	0.000162115		actP	b4067	-1.20095	0.356598		actP	b4067	1.87221	0.111501			actP	b4067	-0.49763	0.728153		actP	b4067	-2.28763	0.0462554		actP	b4067	2.05919	0.0577719			actP	b4067
acuI	b3253	-0.396258	0.496946		acuI	b3253	-0.974972	0.070653		acuI	b3253	-0.520166	0.331057			acuI	b3253	-1.12626	0.0122078		acuI	b3253	-0.290601	0.657754		acuI	b3253	-0.549714	0.357719			acuI	b3253	-0.598333	0.238373		acuI	b3253	0.0215258	0.978421		acuI	b3253	-0.278482	0.647043			acuI	b3253
ada	b2213	-1.42196	0.00904908		ada	b2213	-1.05511	0.0817668		ada	b2213	-1.05436	0.0566406			ada	b2213	-1.54344	0.0023663		ada	b2213	-1.18262	0.0432924		ada	b2213	-0.145111	0.859993			ada	b2213	-1.77904	0.000440582		ada	b2213	-1.29349	0.0213496		ada	b2213	-1.66074	0.00143803			ada	b2213
add	b1623	0.133357	0.861792		add	b1623	0.47826	0.487993		add	b1623	1.35415	0.0101515			add	b1623	0.0853209	0.902546		add	b1623	0.511185	0.438903		add	b1623	1.71892	0.00143663			add	b1623	-0.243831	0.730318		add	b1623	0.692757	0.27397		add	b1623	1.69994	0.000735631			add	b1623
ade	b3665	-0.0220959	0.979159		ade	b3665	0.920091	0.255567		ade	b3665	0.904886	0.196223			ade	b3665	-0.421412	0.586483		ade	b3665	0.479179	0.597346		ade	b3665	0.458161	0.638149			ade	b3665	-0.195156	0.825032		ade	b3665	0.305678	0.768391		ade	b3665	-0.0262534	0.977529			ade	b3665
adhE	b1241	-1.05285	0.0191889		adhE	b1241	-1.70058	9.51323e-05		adhE	b1241	-0.506271	0.332019			adhE	b1241	-0.848794	0.0553321		adhE	b1241	-1.74654	6.94981e-05		adhE	b1241	0.395471	0.479857			adhE	b1241	-0.688705	0.155875		adhE	b1241	-1.40702	0.00165911		adhE	b1241	-0.377933	0.488423			adhE	b1241
adhP	b1478	-1.53246	0.00012627		adhP	b1478	-1.01686	0.0244831		adhP	b1478	-0.306937	0.565884			adhP	b1478	-1.10353	0.00617668		adhP	b1478	-0.793722	0.0955534		adhP	b1478	-0.0683711	0.921063			adhP	b1478	-1.15724	0.00498952		adhP	b1478	-0.474972	0.388276		adhP	b1478	0.341431	0.513884			adhP	b1478
adiA	b4117	0.034718	0.964484		adiA	b4117	0.816764	0.190328		adiA	b4117	-0.152914	0.829452			adiA	b4117	0.288911	0.653871		adiA	b4117	0.484323	0.473299		adiA	b4117	0.863214	0.140384			adiA	b4117	-0.399486	0.53781		adiA	b4117	0.487935	0.471829		adiA	b4117	-0.373144	0.565733			adiA	b4117
adiC	b4115	0.0207873	0.983619		adiC	b4115	-1.26495	0.201091		adiC	b4115	-0.373734	0.701535			adiC	b4115	-0.418906	0.667958		adiC	b4115	-0.0977051	0.938952		adiC	b4115	1.64509	0.037639			adiC	b4115	-0.482127	0.607198		adiC	b4115	-0.74706	0.413274		adiC	b4115	-0.468883	0.644798			adiC	b4115
adiY	b4116	-3.82629	0.0847606		adiY	b4116	-2.53998	0.143829		adiY	b4116	-6.58854	0.00253807			adiY	b4116	-6.03321	0.00414082		adiY	b4116	0.443253	0.834751		adiY	b4116	-0.624096	0.751113			adiY	b4116	-4.12643	0.0127667		adiY	b4116	-4.4101	0.00531975		adiY	b4116	-3.47784	0.0284292			adiY	b4116
adk	b0474	0.435611	0.366963		adk	b0474	0.0911449	0.890208		adk	b0474	0.504697	0.273701			adk	b0474	1.24491	0.000910597		adk	b0474	-0.378131	0.466573		adk	b0474	-0.504521	0.304686			adk	b0474	1.02568	0.00952388		adk	b0474	-0.156299	0.812579		adk	b0474	1.03793	0.00920808			adk	b0474
aegA	b2468	0.532658	0.387085		aegA	b2468	-0.323929	0.633281		aegA	b2468	-0.980538	0.0352485			aegA	b2468	0.326763	0.569531		aegA	b2468	-0.485974	0.418867		aegA	b2468	-1.72705	0.00456125			aegA	b2468	0.350242	0.552596		aegA	b2468	-0.566255	0.323116		aegA	b2468	-0.683581	0.181326			aegA	b2468
aer	b3072	0.233367	0.698324		aer	b3072	0.428762	0.452906		aer	b3072	0.32322	0.561815			aer	b3072	0.124143	0.825927		aer	b3072	-0.871621	0.0808283		aer	b3072	0.00978914	0.991			aer	b3072	0.0481778	0.943912		aer	b3072	-0.524955	0.336722		aer	b3072	0.505241	0.332514			aer	b3072
aes	b0476	-1.61438	0.0286147		aes	b0476	-0.185508	0.856346		aes	b0476	-0.538232	0.488759			aes	b0476	-1.71517	0.00797245		aes	b0476	-1.04118	0.171358		aes	b0476	-1.16237	0.201142			aes	b0476	-1.64608	0.00791971		aes	b0476	-1.11366	0.123426		aes	b0476	-0.558427	0.486188			aes	b0476
afuB	b0263	-1.46287	0.561552		afuB	b0263	-0.21516	0.920047		afuB	b0263	-0.200775	NA			afuB	b0263	-2.38559	0.269506		afuB	b0263	-1.26696	0.456508		afuB	b0263	-1.98489	NA			afuB	b0263	-0.654757	0.729806		afuB	b0263	-1.3116	0.430269		afuB	b0263	-0.486191	0.789307			afuB	b0263
afuC	b0262	0.726391	0.442415		afuC	b0262	0.857204	0.348383		afuC	b0262	-0.0426791	0.973397			afuC	b0262	1.25554	0.0873876		afuC	b0262	-0.169399	0.889721		afuC	b0262	0.68347	0.484088			afuC	b0262	0.564824	0.534314		afuC	b0262	-0.392156	0.726999		afuC	b0262	-0.154628	0.890078			afuC	b0262
agaA	b3135	-0.686238	0.569634		agaA	b3135	0.111988	0.938943		agaA	b3135	-1.98603	0.0143075			agaA	b3135	-1.87171	0.0621421		agaA	b3135	0.0839583	0.957068		agaA	b3135	0.367846	0.739877			agaA	b3135	-0.52684	0.583343		agaA	b3135	-0.336426	0.796418		agaA	b3135	-0.688462	0.460631			agaA	b3135
agaB	b3138	-1.19333	NA		agaB	b3138	0.964655	NA		agaB	b3138	3.3709	NA			agaB	b3138	-2.04472	NA		agaB	b3138	2.2164	NA		agaB	b3138	1.95924	NA			agaB	b3138	-1.33426	NA		agaB	b3138	1.92664	NA		agaB	b3138	2.77343	NA			agaB	b3138
agaC	b3139	-2.51179	0.327021		agaC	b3139	0.252492	NA		agaC	b3139	0.558365	NA			agaC	b3139	-1.98756	0.382862		agaC	b3139	0.454046	NA		agaC	b3139	0.315949	NA			agaC	b3139	0.212875	0.92179		agaC	b3139	0.559733	NA		agaC	b3139	0.554569	NA			agaC	b3139
agaD	b3140	1.22153	0.411067		agaD	b3140	0.854359	0.63906		agaD	b3140	0.166521	0.918551			agaD	b3140	0.366322	0.819038		agaD	b3140	0.501667	0.788728		agaD	b3140	-1.23126	0.545936			agaD	b3140	0.921111	0.499152		agaD	b3140	0.495562	0.796327		agaD	b3140	-1.12774	0.437398			agaD	b3140
agaI	b3141	3.26962	0.0576003		agaI	b3141	0.905649	0.742813		agaI	b3141	-1.95767	NA			agaI	b3141	0.755782	0.749711		agaI	b3141	1.41223	0.526092		agaI	b3141	1.40186	NA			agaI	b3141	1.85047	0.324335		agaI	b3141	1.42704	NA		agaI	b3141	0.392134	NA			agaI	b3141
agaR	b3131	0.97856	0.00751551		agaR	b3131	-0.112249	0.847155		agaR	b3131	0.0704624	0.897701			agaR	b3131	1.3313	4.17917e-05		agaR	b3131	-0.0166408	0.982222		agaR	b3131	-0.89909	0.0443914			agaR	b3131	0.946253	0.00564104		agaR	b3131	-0.15978	0.776874		agaR	b3131	0.0498322	0.926398			agaR	b3131
agaS	b3136	0.769853	0.447379		agaS	b3136	-2.11803	0.0593314		agaS	b3136	-1.30403	0.112993			agaS	b3136	-0.341025	0.750164		agaS	b3136	-0.989488	0.309278		agaS	b3136	-1.6945	0.184215			agaS	b3136	-0.473313	0.644443		agaS	b3136	-0.529829	0.62496		agaS	b3136	-1.19924	0.180106			agaS	b3136
agaV	b3133	-1.65437	0.361873		agaV	b3133	-2.16041	0.303836		agaV	b3133	-1.07928	0.493374			agaV	b3133	-2.35569	0.12346		agaV	b3133	-0.873477	0.624779		agaV	b3133	-0.190779	0.940491			agaV	b3133	-0.749263	0.615211		agaV	b3133	-0.189574	0.926347		agaV	b3133	-0.797764	0.649743			agaV	b3133
agaW	b3134	-0.225252	0.903977		agaW	b3134	-1.61674	0.562812		agaW	b3134	0.20689	0.905662			agaW	b3134	-0.990952	0.469888		agaW	b3134	1.44559	0.344163		agaW	b3134	1.12696	NA			agaW	b3134	-0.356569	0.804862		agaW	b3134	0.145704	0.950189		agaW	b3134	-0.741211	0.650998			agaW	b3134
agp	b1002	-1.74001	0.000346614		agp	b1002	-0.229959	0.762263		agp	b1002	1.00933	0.0624373			agp	b1002	-2.22572	1.55702e-06		agp	b1002	-1.54996	0.00429146		agp	b1002	0.413989	0.549819			agp	b1002	-1.76166	0.000236518		agp	b1002	-0.625557	0.335843		agp	b1002	0.984759	0.0709472			agp	b1002
agrA	b4712	-1.567	0.572809		agrA	b4712	1.07857	0.487993		agrA	b4712	-0.0937909	0.962076			agrA	b4712	-2.4184	0.306125		agrA	b4712	0.82215	0.602517		agrA	b4712	0.296073	NA			agrA	b4712	0.17775	0.941155		agrA	b4712	0.23636	0.902939		agrA	b4712	1.61571	0.206398			agrA	b4712
agrB	b4713	-0.408208	NA		agrB	b4713	2.21794	NA		agrB	b4713	-3.38609	NA			agrB	b4713	-1.25961	NA		agrB	b4713	1.10176	NA		agrB	b4713	1.65094	NA			agrB	b4713	1.26107	NA		agrB	b4713	-0.373708	NA		agrB	b4713	-0.190623	NA			agrB	b4713
ahpC	b0605	-0.920572	0.0248172		ahpC	b0605	-0.283408	0.620753		ahpC	b0605	-0.0320091	0.96168			ahpC	b0605	-0.407236	0.357125		ahpC	b0605	-0.399086	0.441442		ahpC	b0605	-1.03782	0.014955			ahpC	b0605	-1.20068	0.00206848		ahpC	b0605	-0.205437	0.750844		ahpC	b0605	-0.260135	0.619004			ahpC	b0605
ahpF	b0606	-0.349754	0.591968		ahpF	b0606	-0.0969353	0.909764		ahpF	b0606	-0.658456	0.256491			ahpF	b0606	0.440145	0.438119		ahpF	b0606	0.34921	0.621321		ahpF	b0606	-0.621231	0.309034			ahpF	b0606	0.0218739	0.981099		ahpF	b0606	0.636466	0.323116		ahpF	b0606	-0.912992	0.0917062			ahpF	b0606
ahr	b4269	-1.33722	0.00340643		ahr	b4269	-0.639421	0.26793		ahr	b4269	-0.599808	0.254241			ahr	b4269	-1.50442	0.000489334		ahr	b4269	-0.25564	0.703759		ahr	b4269	-0.19807	0.762897			ahr	b4269	-1.10429	0.016102		ahr	b4269	0.423687	0.503277		ahr	b4269	-0.218621	0.725379			ahr	b4269
aidB	b4187	0.593407	0.362096		aidB	b4187	0.418999	0.584642		aidB	b4187	0.143659	0.859371			aidB	b4187	0.331126	0.610653		aidB	b4187	0.723985	0.272941		aidB	b4187	0.0985402	0.91002			aidB	b4187	0.580117	0.372225		aidB	b4187	0.458976	0.554261		aidB	b4187	-0.745386	0.223723			aidB	b4187
ais	b2252	2.52284	0.0797375		ais	b2252	2.15008	0.332518		ais	b2252	0.993933	0.448661			ais	b2252	-1.31206	0.581534		ais	b2252	3.66395	0.0344738		ais	b2252	1.33238	0.365863			ais	b2252	0.941571	0.579867		ais	b2252	3.49591	0.0424324		ais	b2252	-1.14534	0.485947			ais	b2252
alaA	b2290	1.40622	0.0152186		alaA	b2290	0.769583	0.261827		alaA	b2290	0.680501	0.274274			alaA	b2290	0.753875	0.211353		alaA	b2290	1.13819	0.0619041		alaA	b2290	0.225858	0.785337			alaA	b2290	1.03097	0.0762265		alaA	b2290	2.16316	3.49004e-05		alaA	b2290	1.34375	0.0131808			alaA	b2290
alaC	b2379	-0.146649	0.800167		alaC	b2379	-0.69927	0.124465		alaC	b2379	0.5528	0.200593			alaC	b2379	-0.381959	0.374556		alaC	b2379	-0.489887	0.302545		alaC	b2379	0.748089	0.0951933			alaC	b2379	-0.114843	0.833191		alaC	b2379	1.16819	0.00217855		alaC	b2379	0.771221	0.0573284			alaC	b2379
alaE	b2670	-0.537578	0.761996		alaE	b2670	-2.71401	0.0367231		alaE	b2670	-1.31999	0.344036			alaE	b2670	-1.04996	0.455358		alaE	b2670	-0.562864	0.753507		alaE	b2670	-0.305721	0.868094			alaE	b2670	-1.30572	0.364851		alaE	b2670	-4.46814	0.000155574		alaE	b2670	-0.674787	0.666918			alaE	b2670
alaS	b2697	0.334646	0.50242		alaS	b2697	0.0768117	0.909689		alaS	b2697	0.257969	0.620504			alaS	b2697	0.895612	0.0206863		alaS	b2697	0.557782	0.240782		alaS	b2697	0.6907	0.127447			alaS	b2697	0.505191	0.264688		alaS	b2697	0.511241	0.311254		alaS	b2697	0.543106	0.223897			alaS	b2697
alaT	b3853	1.967	0.56629		alaT	b3853	6.48147	0.00567755		alaT	b3853	3.83435	0.0477482			alaT	b3853	3.35022	0.165311		alaT	b3853	5.89245	0.0145414		alaT	b3853	4.24736	0.0392784			alaT	b3853	3.55042	0.144575		alaT	b3853	4.3436	0.0949671		alaT	b3853	3.45674	0.0843789			alaT	b3853
alaU	b3276	3.36059	0.267483		alaU	b3276	6.79627	0.00165605		alaU	b3276	3.42861	0.0608847			alaU	b3276	5.41879	0.010293		alaU	b3276	5.931	0.00856617		alaU	b3276	4.29671	0.024029			alaU	b3276	5.32133	0.0128876		alaU	b3276	4.60641	0.0531136		alaU	b3276	4.55233	0.00853372			alaU	b3276
alaV	b0203	1.9046	0.597598		alaV	b0203	6.54051	0.00439291		alaV	b0203	1.88468	0.302144			alaV	b0203	4.76688	0.0386256		alaV	b0203	6.18477	0.00834884		alaV	b0203	2.12956	0.293618			alaV	b0203	5.40561	0.0155485		alaV	b0203	3.87377	0.1464		alaV	b0203	3.04793	0.0619734			alaV	b0203
alaW	b2397	2.39503	1.64056e-05		alaW	b2397	2.54174	6.25792e-06		alaW	b2397	1.20397	0.0446215			alaW	b2397	3.28259	2.20062e-10		alaW	b2397	2.56999	5.40898e-06		alaW	b2397	1.81854	0.00235719			alaW	b2397	2.40723	7.5497e-06		alaW	b2397	0.420633	0.62949		alaW	b2397	1.24429	0.0372473			alaW	b2397
alaX	b2396	1.96195	0.0583647		alaX	b2396	1.88449	0.0346477		alaX	b2396	1.32504	0.141627			alaX	b2396	2.81963	0.000716308		alaX	b2396	0.503124	0.681932		alaX	b2396	1.15214	0.333243			alaX	b2396	1.94402	0.0303795		alaX	b2396	-0.174978	0.904916		alaX	b2396	0.919129	0.373906			alaX	b2396
aldA	b1415	-1.02888	0.412093		aldA	b1415	-0.742986	0.616604		aldA	b1415	2.74217	0.00935598			aldA	b1415	-2.27247	0.02566		aldA	b1415	0.0376102	0.985006		aldA	b1415	3.17181	0.0028695			aldA	b1415	-0.469284	0.745963		aldA	b1415	-1.43383	0.26888		aldA	b1415	4.40659	6.08921e-06			aldA	b1415
aldB	b3588	-1.33503	0.1626		aldB	b3588	0.175406	0.905041		aldB	b3588	2.18103	0.0130682			aldB	b3588	-2.68174	0.000923894		aldB	b3588	-0.176001	0.903896		aldB	b3588	2.88995	0.000885236			aldB	b3588	-1.3819	0.140335		aldB	b3588	-1.43298	0.157682		aldB	b3588	2.6893	0.00134899			aldB	b3588
alkA	b2068	-0.0717795	0.915676		alkA	b2068	0.241776	0.714526		alkA	b2068	-0.397603	0.455301			alkA	b2068	-0.863096	0.0520694		alkA	b2068	0.395076	0.492931		alkA	b2068	0.0230779	0.980531			alkA	b2068	-0.780192	0.080905		alkA	b2068	0.636339	0.22225		alkA	b2068	0.26932	0.643148			alkA	b2068
alkB	b2212	-0.317387	0.774272		alkB	b2212	0.124853	0.916308		alkB	b2212	0.220645	0.811663			alkB	b2212	-0.654554	0.427124		alkB	b2212	0.588598	0.500148		alkB	b2212	0.79866	0.341043			alkB	b2212	-0.426659	0.628147		alkB	b2212	-0.130531	0.908942		alkB	b2212	-1.5393	0.0445646			alkB	b2212
allA	b0505	0.269039	0.860478		allA	b0505	-0.362388	0.8216		allA	b0505	-0.297862	0.805255			allA	b0505	-0.0431137	0.979189		allA	b0505	0.182343	0.906082		allA	b0505	1.62777	0.0880888			allA	b0505	0.171955	0.896295		allA	b0505	0.203056	0.890919		allA	b0505	-0.854826	0.448975			allA	b0505
allB	b0512	0.4233	0.717226		allB	b0512	0.194861	0.881265		allB	b0512	-1.21399	0.127566			allB	b0512	-0.142735	0.899781		allB	b0512	0.556631	0.581672		allB	b0512	1.34266	0.0956449			allB	b0512	-0.199283	0.854861		allB	b0512	-0.363197	0.761393		allB	b0512	-0.151827	0.888579			allB	b0512
allC	b0516	0.422384	0.691965		allC	b0516	-0.369202	0.75284		allC	b0516	0.425914	0.645214			allC	b0516	0.699617	0.372797		allC	b0516	0.254835	0.81925		allC	b0516	0.422003	0.725149			allC	b0516	0.841944	0.272099		allC	b0516	0.656093	0.476279		allC	b0516	0.219147	0.837201			allC	b0516
allD	b0517	2.96187	0.416622		allD	b0517	-1.51288	NA		allD	b0517	-1.6083	NA			allD	b0517	3.13429	0.318482		allD	b0517	1.08905	NA		allD	b0517	0.937762	NA			allD	b0517	3.2252	0.325319		allD	b0517	0.942492	NA		allD	b0517	1.1949	NA			allD	b0517
allE	b0515	-1.47026	0.0948112		allE	b0515	-1.10039	0.31707		allE	b0515	-0.203689	0.850013			allE	b0515	-2.76488	0.000854467		allE	b0515	-1.01817	0.278941		allE	b0515	0.342804	0.774274			allE	b0515	-1.59492	0.0198469		allE	b0515	0.0982791	0.936872		allE	b0515	-0.195077	0.86274			allE	b0515
allR	b0506	-0.0496976	0.941613		allR	b0506	-0.781133	0.170939		allR	b0506	-1.2945	0.00620244			allR	b0506	0.0391505	0.95475		allR	b0506	-0.277222	0.682712		allR	b0506	-0.350591	0.571086			allR	b0506	-0.174428	0.789876		allR	b0506	-1.0264	0.0491863		allR	b0506	-1.16069	0.0149919			allR	b0506
allS	b0504	-1.50593	0.336645		allS	b0504	0.501199	0.742352		allS	b0504	-0.16124	0.903613			allS	b0504	-2.11624	0.0997132		allS	b0504	0.855968	0.49086		allS	b0504	0.808262	0.474904			allS	b0504	-0.0714499	0.959444		allS	b0504	1.51351	0.147244		allS	b0504	0.135684	0.915833			allS	b0504
alpA	b2624	1.90384	NA		alpA	b2624	0.964644	NA		alpA	b2624	-0.415372	NA			alpA	b2624	2.97749	NA		alpA	b2624	2.44789	NA		alpA	b2624	1.95922	NA			alpA	b2624	2.37364	NA		alpA	b2624	-0.42261	NA		alpA	b2624	0.441826	NA			alpA	b2624
alr	b4053	0.528377	0.339715		alr	b4053	0.806466	0.148323		alr	b4053	0.476144	0.397014			alr	b4053	0.484135	0.328179		alr	b4053	0.875692	0.0988675		alr	b4053	0.977679	0.083689			alr	b4053	0.583451	0.242104		alr	b4053	0.439803	0.482697		alr	b4053	0.640972	0.235135			alr	b4053
alsA	b4087	1.82926	0.202865		alsA	b4087	-0.201734	0.928071		alsA	b4087	1.30694	0.371101			alsA	b4087	0.447185	0.792221		alsA	b4087	1.01158	0.526092		alsA	b4087	2.35968	0.101304			alsA	b4087	0.182132	0.926089		alsA	b4087	0.487307	0.80216		alsA	b4087	1.1942	0.438016			alsA	b4087
alsB	b4088	-1.26064	0.542006		alsB	b4088	-0.95956	0.569087		alsB	b4088	-1.27891	0.424294			alsB	b4088	-0.0285774	0.989894		alsB	b4088	-1.938	0.168912		alsB	b4088	-0.306501	NA			alsB	b4088	0.566762	0.687794		alsB	b4088	-0.654991	0.678076		alsB	b4088	1.28343	0.337686			alsB	b4088
alsC	b4086	0.855161	0.59898		alsC	b4086	-0.123921	0.946394		alsC	b4086	1.48497	0.179312			alsC	b4086	1.77084	0.0984784		alsC	b4086	-0.112685	0.951188		alsC	b4086	1.13332	0.465149			alsC	b4086	1.15457	0.334383		alsC	b4086	0.444619	0.762969		alsC	b4086	1.25408	0.29616			alsC	b4086
alsE	b4085	0.0920085	0.949047		alsE	b4085	-0.0759285	0.968084		alsE	b4085	-0.823174	0.406289			alsE	b4085	0.0567366	0.968123		alsE	b4085	0.11142	0.945304		alsE	b4085	0.427981	0.738847			alsE	b4085	0.428445	0.685613		alsE	b4085	0.534776	0.670656		alsE	b4085	-0.611448	0.584972			alsE	b4085
alsK	b4084	0.143184	0.88421		alsK	b4084	-0.919839	0.275019		alsK	b4084	-1.17877	0.0523083			alsK	b4084	-0.57697	0.420648		alsK	b4084	-0.765984	0.31728		alsK	b4084	-0.800839	0.347755			alsK	b4084	-0.250269	0.754996		alsK	b4084	-0.307776	0.740668		alsK	b4084	-1.10448	0.0923058			alsK	b4084
alsR	b4089	-0.411492	0.623296		alsR	b4089	0.536457	0.537303		alsR	b4089	0.708385	0.325123			alsR	b4089	-0.748213	0.259146		alsR	b4089	0.1762	0.865669		alsR	b4089	0.151975	0.900148			alsR	b4089	-0.722665	0.279157		alsR	b4089	0.380693	0.674086		alsR	b4089	1.60081	0.00913505			alsR	b4089
alx	b3088	0.141813	0.877891		alx	b3088	0.135558	0.880374		alx	b3088	0.322037	0.648765			alx	b3088	0.256126	0.712074		alx	b3088	0.492238	0.472367		alx	b3088	1.21584	0.0535739			alx	b3088	-0.0719799	0.932672		alx	b3088	-0.385268	0.612313		alx	b3088	0.339232	0.645029			alx	b3088
amiA	b2435	0.335587	0.52927		amiA	b2435	0.0508219	0.941485		amiA	b2435	-0.366588	0.449013			amiA	b2435	0.309023	0.50661		amiA	b2435	-0.1635	0.79071		amiA	b2435	-0.0109292	0.991			amiA	b2435	0.491715	0.270998		amiA	b2435	-0.91953	0.0320896		amiA	b2435	-0.388207	0.436687			amiA	b2435
amiB	b4169	0.465824	0.183148		amiB	b4169	-0.0719723	0.886421		amiB	b4169	-0.353733	0.316929			amiB	b4169	-0.0868525	0.830218		amiB	b4169	-0.129142	0.783		amiB	b4169	-0.218839	0.599844			amiB	b4169	0.112484	0.7891		amiB	b4169	-0.621708	0.0662166		amiB	b4169	-0.708569	0.0238265			amiB	b4169
amiC	b2817	1.36115	3.73413e-05		amiC	b2817	1.32547	0.000147026		amiC	b2817	1.25836	0.000177478			amiC	b2817	1.62412	1.70848e-07		amiC	b2817	1.14991	0.00154783		amiC	b2817	0.872836	0.0280273			amiC	b2817	1.4267	6.3205e-06		amiC	b2817	1.23706	0.000338408		amiC	b2817	0.96066	0.0063772			amiC	b2817
amiD	b0867	-0.782664	0.106239		amiD	b0867	-0.511026	0.380359		amiD	b0867	-0.432512	0.420452			amiD	b0867	-1.37397	0.00106156		amiD	b0867	-0.595657	0.275147		amiD	b0867	-0.210875	0.744999			amiD	b0867	-0.94255	0.0359831		amiD	b0867	0.137797	0.855011		amiD	b0867	-0.278829	0.636431			amiD	b0867
amn	b1982	-0.585697	0.226689		amn	b1982	0.316609	0.585874		amn	b1982	1.58342	0.000132791			amn	b1982	-0.586875	0.173676		amn	b1982	-0.971477	0.03736		amn	b1982	0.56174	0.347561			amn	b1982	-0.826774	0.0491458		amn	b1982	0.739346	0.112276		amn	b1982	1.57305	0.000154147			amn	b1982
ampC	b4150	0.783967	0.269611		ampC	b4150	0.526425	0.511935		ampC	b4150	-0.402261	0.565855			ampC	b4150	0.591473	0.350274		ampC	b4150	0.776812	0.248208		ampC	b4150	0.0921521	0.935022			ampC	b4150	0.743952	0.211408		ampC	b4150	0.768748	0.248862		ampC	b4150	0.6935	0.262665			ampC	b4150
ampD	b0110	-0.891654	0.101831		ampD	b0110	-0.505827	0.402427		ampD	b0110	0.538474	0.32704			ampD	b0110	-0.47658	0.346059		ampD	b0110	-1.23519	0.0140341		ampD	b0110	0.85203	0.153814			ampD	b0110	-0.381428	0.485982		ampD	b0110	-0.619438	0.260302		ampD	b0110	0.757112	0.149923			ampD	b0110
ampE	b0111	-0.836846	0.0852283		ampE	b0111	-0.74605	0.148477		ampE	b0111	0.070098	0.918149			ampE	b0111	-1.37342	0.00105549		ampE	b0111	-1.38897	0.00236695		ampE	b0111	0.285911	0.66212			ampE	b0111	-1.08268	0.00904253		ampE	b0111	-0.428874	0.439083		ampE	b0111	0.312097	0.5809			ampE	b0111
ampG	b0433	0.642144	0.458187		ampG	b0433	0.589618	0.528742		ampG	b0433	0.316034	0.73765			ampG	b0433	0.6027	0.433733		ampG	b0433	1.18626	0.126156		ampG	b0433	0.577168	0.540905			ampG	b0433	0.32222	0.730908		ampG	b0433	0.286565	0.793862		ampG	b0433	0.813313	0.301253			ampG	b0433
ampH	b0376	-0.110152	0.945802		ampH	b0376	-0.26409	0.888739		ampH	b0376	0.71508	0.631342			ampH	b0376	-1.38379	0.252878		ampH	b0376	0.883077	0.558939		ampH	b0376	1.26857	0.372108			ampH	b0376	-0.590555	0.691605		ampH	b0376	0.171877	0.930107		ampH	b0376	1.77135	0.152979			ampH	b0376
amtB	b0451	-0.187889	0.926376		amtB	b0451	-4.81313	0.000456644		amtB	b0451	-4.54397	0.000704271			amtB	b0451	0.170781	0.934745		amtB	b0451	-0.556341	0.790629		amtB	b0451	-2.13284	0.177514			amtB	b0451	-0.386193	0.846512		amtB	b0451	1.347	0.470163		amtB	b0451	-1.0964	0.520796			amtB	b0451
amyA	b1927	-0.87918	0.080537		amyA	b1927	-0.596401	0.329371		amyA	b1927	-1.5538	0.00104416			amyA	b1927	-1.57773	0.000357967		amyA	b1927	-0.732111	0.198829		amyA	b1927	-0.68002	0.246694			amyA	b1927	-0.770462	0.130078		amyA	b1927	0.182292	0.817539		amyA	b1927	-0.325624	0.600632			amyA	b1927
anmK	b1640	0.0255431	0.964294		anmK	b1640	-0.360429	0.53165		anmK	b1640	-0.183267	0.750869			anmK	b1640	-0.0389674	0.948447		anmK	b1640	-0.101296	0.883547		anmK	b1640	-0.698137	0.200495			anmK	b1640	0.00997306	0.990566		anmK	b1640	-0.337578	0.562464		anmK	b1640	-0.447077	0.371776			anmK	b1640
ansA	b1767	0.954652	0.0315343		ansA	b1767	0.597264	0.266176		ansA	b1767	0.461306	0.32312			ansA	b1767	0.893109	0.0274457		ansA	b1767	1.12084	0.0106064		ansA	b1767	0.761256	0.127676			ansA	b1767	1.00723	0.01018		ansA	b1767	1.41002	0.000387613		ansA	b1767	0.290251	0.585504			ansA	b1767
ansB	b2957	-1.16225	0.0174184		ansB	b2957	-0.468237	0.456382		ansB	b2957	0.173935	0.794062			ansB	b2957	-1.66099	0.000171735		ansB	b2957	-0.0538731	0.951103		ansB	b2957	0.195001	0.777824			ansB	b2957	-1.32003	0.00321061		ansB	b2957	-0.571089	0.33436		ansB	b2957	-0.153922	0.818464			ansB	b2957
ansP	b1453	-0.880651	0.271661		ansP	b1453	-0.657241	0.39774		ansP	b1453	-0.121528	0.889206			ansP	b1453	-1.15385	0.0742578		ansP	b1453	-0.50205	0.502645		ansP	b1453	-0.0457421	0.972735			ansP	b1453	-1.40658	0.0172265		ansP	b1453	0.201796	0.822141		ansP	b1453	0.755764	0.2331			ansP	b1453
apaG	b0050	0.406166	0.387632		apaG	b0050	0.725934	0.0990847		apaG	b0050	-0.121423	0.815406			apaG	b0050	0.862175	0.0165974		apaG	b0050	0.660192	0.135118		apaG	b0050	-0.302211	0.562883			apaG	b0050	0.37769	0.388056		apaG	b0050	0.419074	0.390969		apaG	b0050	-0.510217	0.226338			apaG	b0050
apaH	b0049	0.433434	0.306709		apaH	b0049	0.524969	0.223632		apaH	b0049	0.260535	0.536587			apaH	b0049	0.60129	0.0841156		apaH	b0049	0.970666	0.00789393		apaH	b0049	0.500972	0.235959			apaH	b0049	0.729622	0.0332688		apaH	b0049	0.695424	0.0692368		apaH	b0049	0.254422	0.559963			apaH	b0049
apbE	b2214	0.292985	0.815494		apbE	b2214	0.340793	0.761602		apbE	b2214	0.476313	0.631308			apbE	b2214	0.638793	0.479842		apbE	b2214	1.07881	0.221352		apbE	b2214	1.27529	0.159178			apbE	b2214	0.421502	0.681942		apbE	b2214	-0.982294	0.303993		apbE	b2214	0.0197199	0.986976			apbE	b2214
aphA	b4055	0.0472362	0.963547		aphA	b4055	0.301857	0.786071		aphA	b4055	2.43339	0.00135611			aphA	b4055	0.376573	0.672736		aphA	b4055	-0.991851	0.283455		aphA	b4055	-0.17211	0.913126			aphA	b4055	0.263582	0.791724		aphA	b4055	-1.13855	0.202633		aphA	b4055	2.99569	4.04167e-05			aphA	b4055
appA	b0980	1.04843	0.0430958		appA	b0980	0.146305	0.855545		appA	b0980	0.472179	0.399005			appA	b0980	0.524337	0.330361		appA	b0980	0.0744874	0.932472		appA	b0980	0.906089	0.100294			appA	b0980	0.328662	0.594603		appA	b0980	0.440754	0.496359		appA	b0980	-0.351136	0.577055			appA	b0980
appY	b0564	-1.59234	0.324656		appY	b0564	-2.98962	0.0270137		appY	b0564	-3.79162	0.000409114			appY	b0564	-5.91623	0.00244704		appY	b0564	-1.29639	0.345381		appY	b0564	-2.49383	0.0503365			appY	b0564	-3.26174	0.0128876		appY	b0564	-3.48857	0.00335177		appY	b0564	-3.80345	0.000678206			appY	b0564
apt	b0469	3.21226	0.0001584		apt	b0469	1.69012	0.0954357		apt	b0469	0.844901	0.42935			apt	b0469	3.64123	7.87338e-06		apt	b0469	2.62682	0.00425921		apt	b0469	1.46227	0.151613			apt	b0469	3.16134	0.000184049		apt	b0469	1.47276	0.15492		apt	b0469	0.821853	0.443671			apt	b0469
aqpZ	b0875	-1.52396	0.0154536		aqpZ	b0875	-2.12552	0.000388077		aqpZ	b0875	-2.05441	0.00012126			aqpZ	b0875	-2.17116	0.000139695		aqpZ	b0875	-0.253794	0.767006		aqpZ	b0875	-1.55952	0.0110507			aqpZ	b0875	-2.06487	0.000153766		aqpZ	b0875	-1.03587	0.102727		aqpZ	b0875	-2.1324	7.5015e-05			aqpZ	b0875
araC	b0064	-2.70097	5.75641e-06		araC	b0064	-1.49444	0.0325674		araC	b0064	0.370675	0.655			araC	b0064	-3.55841	4.41242e-10		araC	b0064	-1.98788	0.00316868		araC	b0064	0.786199	0.332557			araC	b0064	-2.76272	5.29175e-07		araC	b0064	-1.47069	0.025459		araC	b0064	1.36643	0.0344234			araC	b0064
araD	b0061	0.447709	0.860696		araD	b0061	-4.16852	0.108267		araD	b0061	-0.779239	NA			araD	b0061	0.0281681	0.992362		araD	b0061	-0.566509	0.816695		araD	b0061	2.71292	NA			araD	b0061	-1.41797	0.497021		araD	b0061	-0.404881	0.871129		araD	b0061	-0.302973	0.906572			araD	b0061
araE	b2841	-0.252513	0.760039		araE	b2841	-0.615526	0.394881		araE	b2841	-1.14068	0.0395382			araE	b2841	-0.686679	0.263691		araE	b2841	-0.422523	0.573646		araE	b2841	-1.37912	0.0211781			araE	b2841	-0.216502	0.778813		araE	b2841	-0.87028	0.178248		araE	b2841	-2.02915	0.000107006			araE	b2841
araF	b1901	-1.22179	0.266051		araF	b1901	-0.144616	0.924285		araF	b1901	0.0112805	0.99558			araF	b1901	-2.01546	0.0302925		araF	b1901	0.536697	0.663396		araF	b1901	0.329709	0.809407			araF	b1901	-1.25735	0.17962		araF	b1901	-0.305358	0.833708		araF	b1901	-0.353296	0.776545			araF	b1901
araG	b1900	0.0683581	0.926135		araG	b1900	-0.171808	0.812063		araG	b1900	-0.233469	0.694341			araG	b1900	-0.505636	0.34895		araG	b1900	-0.127492	0.865739		araG	b1900	-0.417215	0.533762			araG	b1900	-0.342603	0.551826		araG	b1900	-0.0684509	0.929785		araG	b1900	-0.399571	0.481921			araG	b1900
araH	b4460	-0.677921	0.300324		araH	b4460	-0.812077	0.202389		araH	b4460	-1.36786	0.00407558			araH	b4460	-1.13619	0.0313063		araH	b4460	0.164323	0.83226		araH	b4460	-0.80665	0.202213			araH	b4460	-1.18199	0.0171583		araH	b4460	0.216079	0.777927		araH	b4460	-1.33923	0.00745827			araH	b4460
araJ	b0396	-0.986845	0.101441		araJ	b0396	-0.109314	0.897712		araJ	b0396	-0.575848	0.302114			araJ	b0396	-2.45844	1.01311e-05		araJ	b0396	-0.242829	0.74999		araJ	b0396	-0.610244	0.365863			araJ	b0396	-0.894125	0.0786082		araJ	b0396	-0.211747	0.787329		araJ	b0396	-0.700624	0.207784			araJ	b0396
arcA	b4401	0.813481	0.169728		arcA	b4401	-0.16175	0.849856		arcA	b4401	0.133882	0.866789			arcA	b4401	0.484167	0.415137		arcA	b4401	-0.223599	0.784161		arcA	b4401	0.21468	0.777506			arcA	b4401	0.866725	0.13211		arcA	b4401	-0.449354	0.551072		arcA	b4401	-0.0700698	0.930423			arcA	b4401
arcB	b3210	-0.466491	0.292704		arcB	b3210	-0.535248	0.241685		arcB	b3210	-0.127048	0.811663			arcB	b3210	-0.31215	0.456366		arcB	b3210	-1.12789	0.00397834		arcB	b3210	-0.254255	0.63767			arcB	b3210	-0.474205	0.254236		arcB	b3210	-0.712717	0.0860375		arcB	b3210	0.0585344	0.919022			arcB	b3210
arcZ	b4450	0.188929	0.857377		arcZ	b4450	0.398353	0.690521		arcZ	b4450	-0.0406839	0.972132			arcZ	b4450	0.526792	0.483085		arcZ	b4450	-0.493539	0.611468		arcZ	b4450	-0.89374	0.40706			arcZ	b4450	0.263624	0.769669		arcZ	b4450	-0.245275	0.827009		arcZ	b4450	0.0829628	0.938011			arcZ	b4450
arfA	b4550	-2.49321	0.0074769		arfA	b4550	-1.50795	0.184071		arfA	b4550	-1.41627	0.166139			arfA	b4550	-4.06743	3.19047e-06		arfA	b4550	-1.44672	0.192232		arfA	b4550	-1.8685	0.086819			arfA	b4550	-2.60679	0.0035801		arfA	b4550	-0.971331	0.430418		arfA	b4550	-0.986127	0.366754			arfA	b4550
arfB	b0191	-0.12408	0.883596		arfB	b0191	-0.29728	0.710406		arfB	b0191	-0.5183	0.407013			arfB	b0191	-0.795576	0.165113		arfB	b0191	-0.161845	0.851909		arfB	b0191	-0.599597	0.385274			arfB	b0191	-0.578091	0.351557		arfB	b0191	-0.16715	0.850276		arfB	b0191	-0.512299	0.422426			arfB	b0191
argA	b2818	-1.16756	0.126773		argA	b2818	-1.2408	0.127637		argA	b2818	-2.64543	7.72531e-05			argA	b2818	-1.93471	0.00365654		argA	b2818	-1.68599	0.0251138		argA	b2818	-2.30335	0.00142001			argA	b2818	-0.748362	0.362046		argA	b2818	-1.11337	0.176903		argA	b2818	-3.01579	5.03748e-06			argA	b2818
argB	b3959	0.563606	0.550529		argB	b3959	-0.602721	0.560638		argB	b3959	-1.23504	0.127053			argB	b3959	0.140551	0.888447		argB	b3959	-1.56216	0.0606537		argB	b3959	-1.40127	0.0999544			argB	b3959	0.767478	0.386246		argB	b3959	-1.0477	0.255917		argB	b3959	-2.03568	0.00663898			argB	b3959
argC	b3958	-1.1442	0.203941		argC	b3958	-0.298628	0.802205		argC	b3958	-1.95697	0.0145328			argC	b3958	-2.28664	0.00254535		argC	b3958	-2.6609	0.00122645		argC	b3958	-1.92942	0.0264121			argC	b3958	-0.662239	0.496912		argC	b3958	-1.14753	0.235292		argC	b3958	-2.93366	0.000142363			argC	b3958
argD	b3359	-0.5556	0.46426		argD	b3359	-0.398969	0.655341		argD	b3359	-1.76582	0.00365336			argD	b3359	-1.87794	0.0013675		argD	b3359	-0.305911	0.740483		argD	b3359	-1.38668	0.0398123			argD	b3359	-0.428256	0.587394		argD	b3359	-0.499111	0.568467		argD	b3359	-2.52102	1.6788e-05			argD	b3359
argE	b3957	-0.117002	0.891213		argE	b3957	0.305834	0.711466		argE	b3957	-0.0823457	0.927164			argE	b3957	-0.403353	0.537688		argE	b3957	-0.997195	0.127427		argE	b3957	-0.450615	0.54564			argE	b3957	-0.396835	0.582395		argE	b3957	-0.0437173	0.965579		argE	b3957	-0.320909	0.668001			argE	b3957
argF	b0273	-1.08307	0.313963		argF	b0273	-0.793908	0.524328		argF	b0273	-1.85848	0.0524473			argF	b0273	-2.85915	0.000955596		argF	b0273	-2.10298	0.0360114		argF	b0273	-0.841437	0.471247			argF	b0273	-0.0248558	0.989248		argF	b0273	-0.76157	0.557983		argF	b0273	-2.73158	0.00274389			argF	b0273
argG	b3172	-0.390764	0.563403		argG	b3172	-0.312649	0.688045		argG	b3172	-0.700083	0.248324			argG	b3172	-1.09284	0.036999		argG	b3172	-1.14296	0.0506033		argG	b3172	-0.794003	0.20611			argG	b3172	-0.0707492	0.932672		argG	b3172	-0.461359	0.530604		argG	b3172	-0.594628	0.336266			argG	b3172
argH	b3960	0.0461437	0.964015		argH	b3960	-0.870641	0.360188		argH	b3960	-1.78455	0.0186594			argH	b3960	-0.234715	0.807081		argH	b3960	-1.55077	0.0607119		argH	b3960	-1.5397	0.0599348			argH	b3960	0.727724	0.418303		argH	b3960	-1.29429	0.133821		argH	b3960	-2.06265	0.00524768			argH	b3960
argI	b4254	-1.36654	0.245287		argI	b4254	-0.925045	0.505468		argI	b4254	-1.96398	0.0724407			argI	b4254	-3.84725	7.53096e-05		argI	b4254	-2.35576	0.0383968		argI	b4254	-0.8236	0.540905			argI	b4254	-0.419384	0.769456		argI	b4254	-0.797437	0.588199		argI	b4254	-5.03101	8.60846e-06			argI	b4254
argK	b2918	1.43277	0.187127		argK	b2918	-0.607718	0.699534		argK	b2918	0.0784904	0.954382			argK	b2918	-0.509086	0.710935		argK	b2918	0.234145	0.876273		argK	b2918	0.488256	0.72981			argK	b2918	0.548513	0.640052		argK	b2918	0.779541	0.507479		argK	b2918	0.263096	0.835322			argK	b2918
argO	b2923	0.0299775	0.967295		argO	b2923	-0.35918	0.584642		argO	b2923	-0.2696	0.644819			argO	b2923	0.971109	0.043129		argO	b2923	-0.20017	0.776672		argO	b2923	-0.386292	0.560749			argO	b2923	0.289916	0.641842		argO	b2923	0.545179	0.327573		argO	b2923	-1.00383	0.0419262			argO	b2923
argP	b2916	1.22486	0.0789466		argP	b2916	0.36984	0.701046		argP	b2916	0.0838559	0.939892			argP	b2916	1.74679	0.00504858		argP	b2916	0.0974854	0.933889		argP	b2916	-1.41924	0.0644876			argP	b2916	1.08551	0.121582		argP	b2916	0.500443	0.597357		argP	b2916	-0.0743964	0.941993			argP	b2916
argQ	b2691	5.35131	7.52633e-06		argQ	b2691	3.19297	0.0154494		argQ	b2691	0.201027	0.911049			argQ	b2691	2.49952	0.0586786		argQ	b2691	3.34004	0.010788		argQ	b2691	2.1713	0.0857781			argQ	b2691	4.14708	0.000669508		argQ	b2691	1.42417	0.384699		argQ	b2691	-0.284566	0.869662			argQ	b2691
argR	b3237	-1.0991	0.0125666		argR	b3237	-0.00760664	0.99387		argR	b3237	-0.485647	0.325637			argR	b3237	-1.49875	0.000192998		argR	b3237	-0.00992707	0.991934		argR	b3237	-1.04302	0.0281746			argR	b3237	-1.20746	0.00332251		argR	b3237	-0.954971	0.0403949		argR	b3237	-1.41577	0.000654792			argR	b3237
argS	b1876	1.1233	0.0592206		argS	b1876	1.01578	0.121935		argS	b1876	0.676341	0.305824			argS	b1876	1.63384	0.00215516		argS	b1876	1.42751	0.0176436		argS	b1876	1.39959	0.019493			argS	b1876	1.04477	0.0783773		argS	b1876	0.660074	0.365531		argS	b1876	0.732933	0.252031			argS	b1876
argT	b2310	-0.333269	0.739866		argT	b2310	-2.22347	0.00306896		argT	b2310	-2.21725	0.00194583			argT	b2310	-1.23575	0.0911483		argT	b2310	0.657255	0.480677		argT	b2310	-0.760815	0.401619			argT	b2310	0.422256	0.655632		argT	b2310	1.83902	0.0143817		argT	b2310	1.0463	0.186779			argT	b2310
argU	b0536	-3.40811	0.119964		argU	b0536	1.31672	0.318084		argU	b0536	0.622676	0.626361			argU	b0536	-2.87637	0.139571		argU	b0536	1.41551	0.248367		argU	b0536	-1.42929	0.47416			argU	b0536	-1.51473	0.279157		argU	b0536	1.398	0.255917		argU	b0536	0.381556	0.789307			argU	b0536
argV	b2694	3.13898	0.00376103		argV	b2694	3.27646	0.00332407		argV	b2694	2.21917	0.0496966			argV	b2694	1.46488	0.215493		argV	b2694	3.45	0.00196975		argV	b2694	2.90555	0.010544			argV	b2694	2.40758	0.0313787		argV	b2694	1.80573	0.157089		argV	b2694	2.32384	0.0367739			argV	b2694
argW	b2348	-0.541001	NA		argW	b2348	1.52218	NA		argW	b2348	-0.212987	NA			argW	b2348	-1.3924	NA		argW	b2348	-0.13842	NA		argW	b2348	1.16964	NA			argW	b2348	-2.58418	NA		argW	b2348	-1.35723	NA		argW	b2348	-1.54013	NA			argW	b2348
argX	b3796	1.30803	0.0915774		argX	b3796	1.05461	0.225526		argX	b3796	-0.74915	0.376459			argX	b3796	0.5908	0.472783		argX	b3796	1.77576	0.0194864		argX	b3796	-0.709101	0.431344			argX	b3796	0.732119	0.396451		argX	b3796	0.359898	0.755764		argX	b3796	-0.145887	0.890078			argX	b3796
argY	b2693	4.04681	5.98988e-07		argY	b2693	5.1422	3.75551e-10		argY	b2693	4.09453	7.74181e-07			argY	b2693	2.93313	0.000334633		argY	b2693	3.87733	5.62617e-06		argY	b2693	4.77806	1.44266e-08			argY	b2693	3.12403	0.0001657		argY	b2693	2.01015	0.0361646		argY	b2693	2.76968	0.00128211			argY	b2693
argZ	b2692	3.31002	0.000200437		argZ	b2692	3.42075	0.000131978		argZ	b2692	2.73429	0.00281802			argZ	b2692	4.40072	1.45611e-07		argZ	b2692	2.98555	0.00131661		argZ	b2692	3.7881	2.66556e-05			argZ	b2692	2.82126	0.00163992		argZ	b2692	1.40473	0.202633		argZ	b2692	2.34771	0.0118843			argZ	b2692
ariR	b1166	-2.44068	0.00225262		ariR	b1166	3.30152	0.000920657		ariR	b1166	1.50398	0.142135			ariR	b1166	-4.38631	6.23224e-09		ariR	b1166	4.25744	7.06788e-06		ariR	b1166	2.92361	0.00278391			ariR	b1166	-2.07265	0.00935511		ariR	b1166	3.73366	8.65969e-05		ariR	b1166	-1.19748	0.387893			ariR	b1166
arnA	b2255	0.161622	0.788726		arnA	b2255	0.684228	0.167888		arnA	b2255	1.0001	0.0175199			arnA	b2255	-0.129327	0.808516		arnA	b2255	0.398829	0.462361		arnA	b2255	0.180793	0.77307			arnA	b2255	0.671161	0.124989		arnA	b2255	0.810878	0.0803511		arnA	b2255	0.104777	0.867721			arnA	b2255
arnB	b2253	1.15344	0.0868331		arnB	b2253	2.23767	0.000473072		arnB	b2253	1.59883	0.0121946			arnB	b2253	0.390025	0.60349		arnB	b2253	2.49061	9.26321e-05		arnB	b2253	1.2219	0.0874205			arnB	b2253	1.35205	0.0342081		arnB	b2253	2.70709	1.05414e-05		arnB	b2253	0.827062	0.248366			arnB	b2253
arnC	b2254	0.0477431	0.957552		arnC	b2254	1.96868	0.00166648		arnC	b2254	2.07616	0.00054315			arnC	b2254	-0.560015	0.43528		arnC	b2254	1.2935	0.0619041		arnC	b2254	0.967309	0.229621			arnC	b2254	0.473905	0.529869		arnC	b2254	2.06885	0.00065305		arnC	b2254	0.830884	0.252031			arnC	b2254
arnD	b2256	1.03807	0.0315104		arnD	b2256	1.36544	0.00652208		arnD	b2256	0.856921	0.083156			arnD	b2256	0.195932	0.742676		arnD	b2256	0.463718	0.471171		arnD	b2256	0.420326	0.53398			arnD	b2256	0.984332	0.0313787		arnD	b2256	0.9599	0.0690916		arnD	b2256	-0.272624	0.68153			arnD	b2256
arnE	b4544	0.847556	0.307065		arnE	b4544	2.24131	0.00745233		arnE	b4544	0.531506	0.526333			arnE	b4544	0.313238	0.714055		arnE	b4544	1.16764	0.232509		arnE	b4544	-0.485722	0.713987			arnE	b4544	0.683334	0.364235		arnE	b4544	2.14145	0.00698539		arnE	b4544	-0.474182	0.632097			arnE	b4544
arnF	b2258	-0.482029	0.617392		arnF	b2258	0.721614	0.497595		arnF	b2258	1.13818	0.151866			arnF	b2258	-1.63795	0.0313306		arnF	b2258	1.18681	0.176486		arnF	b2258	0.0353682	0.985601			arnF	b2258	-0.921384	0.218711		arnF	b2258	0.992319	0.273888		arnF	b2258	0.919234	0.288232			arnF	b2258
arnT	b2257	-0.27431	0.642553		arnT	b2257	0.480632	0.422998		arnT	b2257	0.692025	0.160536			arnT	b2257	-0.906937	0.0386835		arnT	b2257	0.081456	0.917459		arnT	b2257	0.698388	0.236989			arnT	b2257	-0.442183	0.377743		arnT	b2257	0.550154	0.322807		arnT	b2257	-0.0903314	0.900428			arnT	b2257
aroA	b0908	1.13531	0.0684177		aroA	b0908	0.492736	0.547399		aroA	b0908	0.437319	0.550313			aroA	b0908	1.15501	0.0468861		aroA	b0908	0.905826	0.191266		aroA	b0908	0.15794	0.866134			aroA	b0908	1.27561	0.0309062		aroA	b0908	2.26379	6.55006e-05		aroA	b0908	0.973076	0.122738			aroA	b0908
aroB	b3389	0.790507	0.0369172		aroB	b3389	0.370074	0.445246		aroB	b3389	0.0245442	0.968902			aroB	b3389	0.575307	0.124526		aroB	b3389	0.370562	0.432537		aroB	b3389	0.0249432	0.973033			aroB	b3389	0.823997	0.0253041		aroB	b3389	0.253991	0.639807		aroB	b3389	-0.0825166	0.879149			aroB	b3389
aroC	b2329	1.12198	0.0266081		aroC	b2329	0.207806	0.784806		aroC	b2329	0.736827	0.184848			aroC	b2329	1.45656	0.00172364		aroC	b2329	0.180782	0.815854		aroC	b2329	0.193228	0.796257			aroC	b2329	0.958683	0.0620638		aroC	b2329	0.441952	0.521567		aroC	b2329	0.391734	0.534645			aroC	b2329
aroD	b1693	0.00918253	0.989574		aroD	b1693	0.57571	0.471144		aroD	b1693	1.25506	0.0214623			aroD	b1693	0.639515	0.242928		aroD	b1693	0.703523	0.301147		aroD	b1693	-0.276177	0.827692			aroD	b1693	0.54759	0.329532		aroD	b1693	1.35026	0.0134325		aroD	b1693	1.87963	0.000277684			aroD	b1693
aroE	b3281	-0.876122	0.15837		aroE	b3281	-0.652313	0.33315		aroE	b3281	-0.629397	0.289374			aroE	b3281	-0.977909	0.0712335		aroE	b3281	-0.591114	0.373034		aroE	b3281	-0.635928	0.328312			aroE	b3281	-0.446461	0.487532		aroE	b3281	-0.512508	0.462663		aroE	b3281	-0.870314	0.122073			aroE	b3281
aroF	b2601	-0.0402939	0.957552		aroF	b2601	-0.278289	0.7261		aroF	b2601	-0.969454	0.0878292			aroF	b2601	-0.510102	0.396733		aroF	b2601	-0.143419	0.87209		aroF	b2601	-1.92387	0.000348776			aroF	b2601	-0.460889	0.490312		aroF	b2601	0.710375	0.290464		aroF	b2601	-1.89207	0.000196877			aroF	b2601
aroG	b0754	1.48625	0.000313194		aroG	b0754	0.872402	0.0736932		aroG	b0754	0.820049	0.0787273			aroG	b0754	2.48144	5.93302e-11		aroG	b0754	-0.379288	0.515824		aroG	b0754	-0.14566	0.846076			aroG	b0754	1.78131	6.36586e-06		aroG	b0754	1.02049	0.0258884		aroG	b0754	1.85473	5.64509e-06			aroG	b0754
aroH	b1704	-0.264728	0.815785		aroH	b1704	0.335834	0.762263		aroH	b1704	0.954595	0.277006			aroH	b1704	-0.282032	0.769095		aroH	b1704	0.244153	0.836304		aroH	b1704	2.64926	0.000492403			aroH	b1704	-0.403682	0.687794		aroH	b1704	-0.599829	0.572423		aroH	b1704	1.11091	0.189573			aroH	b1704
aroK	b3390	1.64557	5.07158e-06		aroK	b3390	0.636378	0.165953		aroK	b3390	0.34018	0.468403			aroK	b3390	1.639	2.87265e-06		aroK	b3390	0.713804	0.10209		aroK	b3390	0.0412059	0.951344			aroK	b3390	1.43642	6.90854e-05		aroK	b3390	-0.135536	0.833763		aroK	b3390	0.037877	0.950055			aroK	b3390
aroL	b0388	-0.504852	0.462344		aroL	b0388	-0.299278	0.697287		aroL	b0388	-0.121296	0.87733			aroL	b0388	0.0924156	0.899543		aroL	b0388	-1.05741	0.0734157		aroL	b0388	-0.919982	0.134587			aroL	b0388	-0.7821	0.183319		aroL	b0388	0.108255	0.902939		aroL	b0388	-0.817428	0.156382			aroL	b0388
aroM	b0390	0.441063	0.59061		aroM	b0390	1.42776	0.0361052		aroM	b0390	1.27113	0.0513187			aroM	b0390	-0.0860859	0.925867		aroM	b0390	1.32898	0.0540672		aroM	b0390	1.17266	0.0956449			aroM	b0390	0.789861	0.269173		aroM	b0390	-0.523729	0.558631		aroM	b0390	1.07593	0.108431			aroM	b0390
aroP	b0112	-0.960405	0.076349		aroP	b0112	-0.284435	0.692033		aroP	b0112	-0.535767	0.330458			aroP	b0112	-1.34949	0.00464396		aroP	b0112	0.595295	0.310889		aroP	b0112	-1.82993	0.000248648			aroP	b0112	-1.15003	0.0172671		aroP	b0112	0.879346	0.104486		aroP	b0112	-1.25663	0.00812613			aroP	b0112
arpA	b4017	1.24916	0.243571		arpA	b4017	1.46265	0.13856		arpA	b4017	1.96338	0.0220895			arpA	b4017	1.79598	0.0346997		arpA	b4017	0.67795	0.556064		arpA	b4017	2.52518	0.00541977			arpA	b4017	1.8312	0.0311369		arpA	b4017	2.118	0.0120624		arpA	b4017	2.96298	0.000211747			arpA	b4017
arrS	b4704	-0.619222	0.56394		arrS	b4704	-0.597383	0.605967		arrS	b4704	-2.19787	0.00715948			arrS	b4704	-1.6225	0.0541297		arrS	b4704	0.708158	0.505997		arrS	b4704	-1.61362	0.0735578			arrS	b4704	-1.9852	0.0176572		arrS	b4704	-1.88558	0.0332231		arrS	b4704	-2.51342	0.00150059			arrS	b4704
arsB	b3502	-0.334517	0.750227		arsB	b3502	-0.290328	0.793859		arsB	b3502	-0.0257073	0.982646			arsB	b3502	-1.12437	0.144033		arsB	b3502	0.702537	0.418226		arsB	b3502	0.23393	0.846076			arsB	b3502	-1.46167	0.040238		arsB	b3502	0.348093	0.740775		arsB	b3502	0.149469	0.885978			arsB	b3502
arsC	b3503	0.656333	0.626222		arsC	b3503	-1.19964	0.577485		arsC	b3503	-0.233719	0.858642			arsC	b3503	0.752929	0.483796		arsC	b3503	2.09679	0.0539331		arsC	b3503	1.28346	0.244248			arsC	b3503	0.755891	0.490435		arsC	b3503	2.35298	0.0199783		arsC	b3503	0.73833	0.497531			arsC	b3503
arsR	b3501	-0.71992	0.752025		arsR	b3501	1.10115	0.47946		arsR	b3501	1.53774	0.305824			arsR	b3501	0.837822	0.54029		arsR	b3501	0.425846	0.813342		arsR	b3501	0.667654	0.792826			arsR	b3501	0.458246	0.769669		arsR	b3501	0.924598	0.550741		arsR	b3501	2.28891	0.09727			arsR	b3501
artI	b0863	0.279514	0.666242		artI	b0863	0.0145814	0.988182		artI	b0863	0.206084	0.766829			artI	b0863	0.315874	0.575962		artI	b0863	-1.91761	0.000108983		artI	b0863	-1.00714	0.100613			artI	b0863	0.253315	0.694543		artI	b0863	-1.23597	0.0152951		artI	b0863	0.387405	0.532457			artI	b0863
artJ	b0860	-2.185	0.00040784		artJ	b0860	0.215876	0.827011		artJ	b0860	-0.927335	0.186777			artJ	b0860	-2.6458	5.97139e-06		artJ	b0860	-1.78208	0.00880203		artJ	b0860	-1.0232	0.190331			artJ	b0860	-1.71825	0.00451981		artJ	b0860	-0.389788	0.678914		artJ	b0860	-1.82546	0.0050233			artJ	b0860
artM	b0861	-0.394801	0.617392		artM	b0861	-0.168776	0.861554		artM	b0861	-0.303981	0.712453			artM	b0861	-0.693846	0.286313		artM	b0861	-1.38718	0.0364805		artM	b0861	-0.47448	0.576483			artM	b0861	-0.415919	0.588545		artM	b0861	-1.16566	0.0833958		artM	b0861	0.185509	0.828769			artM	b0861
artP	b0864	0.287143	0.69152		artP	b0864	1.05825	0.0755893		artP	b0864	1.12699	0.0433617			artP	b0864	0.317525	0.613379		artP	b0864	-0.518559	0.459876		artP	b0864	0.675238	0.315718			artP	b0864	0.202797	0.783208		artP	b0864	0.0886425	0.922409		artP	b0864	1.41181	0.00857783			artP	b0864
artQ	b0862	0.723616	0.0926672		artQ	b0862	0.589033	0.226848		artQ	b0862	0.341017	0.502633			artQ	b0862	0.70412	0.0780381		artQ	b0862	-1.37518	0.00140784		artQ	b0862	-0.11986	0.864942			artQ	b0862	0.308273	0.536036		artQ	b0862	-1.10069	0.00864723		artQ	b0862	0.188902	0.742739			artQ	b0862
ascB	b2716	-1.04998	0.0732854		ascB	b2716	-0.940474	0.122815		ascB	b2716	-0.932133	0.0679958			ascB	b2716	-1.16661	0.0217097		ascB	b2716	-0.151635	0.849976		ascB	b2716	-0.373131	0.591963			ascB	b2716	-0.944337	0.0616241		ascB	b2716	-0.413634	0.540455		ascB	b2716	-0.647642	0.246444			ascB	b2716
ascF	b2715	0.501749	0.486769		ascF	b2715	-0.286065	0.735946		ascF	b2715	0.533835	0.416226			ascF	b2715	-0.143505	0.850823		ascF	b2715	-0.171866	0.847951		ascF	b2715	0.183928	0.853064			ascF	b2715	0.291038	0.681942		ascF	b2715	0.329252	0.678914		ascF	b2715	1.06132	0.0675963			ascF	b2715
ascG	b2714	0.735839	0.280503		ascG	b2714	0.129899	0.894446		ascG	b2714	0.159832	0.8547			ascG	b2714	0.765779	0.196595		ascG	b2714	-1.68014	0.0126629		ascG	b2714	0.35023	0.709211			ascG	b2714	1.07165	0.058921		ascG	b2714	-0.520769	0.507479		ascG	b2714	0.422451	0.584972			ascG	b2714
asd	b3433	1.1329	0.0308251		asd	b3433	0.353465	0.630203		asd	b3433	-1.14338	0.0304751			asd	b3433	0.90807	0.0780836		asd	b3433	-0.726628	0.236389		asd	b3433	-1.81772	0.000428467			asd	b3433	0.670945	0.247435		asd	b3433	0.120853	0.889921		asd	b3433	-1.27468	0.0132391			asd	b3433
aslA	b3801	0.134385	0.869633		aslA	b3801	0.0273428	0.978525		aslA	b3801	-1.15759	0.0197942			aslA	b3801	-1.06925	0.0593696		aslA	b3801	0.0634827	0.946332		aslA	b3801	0.0713228	0.935022			aslA	b3801	-0.551076	0.349765		aslA	b3801	0.103408	0.902939		aslA	b3801	-1.0301	0.05054			aslA	b3801
aslB	b3800	-0.377604	0.770174		aslB	b3800	0.961532	0.372203		aslB	b3800	0.373347	0.739199			aslB	b3800	-2.14875	0.0350475		aslB	b3800	1.25437	0.192336		aslB	b3800	0.696527	0.556586			aslB	b3800	-0.00838955	0.9961		aslB	b3800	0.369305	0.77965		aslB	b3800	0.486485	0.659185			aslB	b3800
asmA	b2064	0.405122	0.330619		asmA	b2064	0.0742244	0.899852		asmA	b2064	0.0310611	0.955447			asmA	b2064	0.837488	0.011896		asmA	b2064	0.117053	0.832838		asmA	b2064	0.176061	0.72981			asmA	b2064	0.470823	0.218873		asmA	b2064	0.230647	0.651696		asmA	b2064	0.174417	0.713525			asmA	b2064
asnA	b3744	2.09913	0.00406317		asnA	b3744	-0.437481	0.688045		asnA	b3744	0.788543	0.370476			asnA	b3744	1.91146	0.00744259		asnA	b3744	-1.71893	0.0320534		asnA	b3744	1.28227	0.124769			asnA	b3744	2.4537	0.000555781		asnA	b3744	-2.85537	8.65204e-05		asnA	b3744	-3.83527	4.22798e-08			asnA	b3744
asnB	b0674	1.09173	0.274978		asnB	b0674	-2.61255	0.00306782		asnB	b0674	-2.8065	0.000828388			asnB	b0674	1.00823	0.276363		asnB	b0674	1.31392	0.192493		asnB	b0674	0.474292	0.688999			asnB	b0674	1.13995	0.240807		asnB	b0674	1.58434	0.106173		asnB	b0674	-3.88775	1.14909e-06			asnB	b0674
asnC	b3743	-2.54871	0.0777759		asnC	b3743	-1.57786	0.243413		asnC	b3743	0.523233	0.727934			asnC	b3743	-1.93315	0.0936382		asnC	b3743	-2.33167	0.0607119		asnC	b3743	1.33964	0.344903			asnC	b3743	-1.43568	0.212552		asnC	b3743	-2.65689	0.0208078		asnC	b3743	0.616558	0.681955			asnC	b3743
asnS	b0930	0.161334	0.80882		asnS	b0930	-0.212829	0.75232		asnS	b0930	-0.073992	0.918227			asnS	b0930	0.768698	0.0953603		asnS	b0930	-0.187749	0.787409		asnS	b0930	-0.568493	0.299778			asnS	b0930	0.562124	0.282067		asnS	b0930	-0.43262	0.48712		asnS	b0930	-0.12278	0.852805			asnS	b0930
asnT	b1977	0.796232	0.761996		asnT	b1977	-2.22461	0.456062		asnT	b1977	1.14565	NA			asnT	b1977	0.618299	0.781381		asnT	b1977	0.0899274	0.977455		asnT	b1977	1.8936	NA			asnT	b1977	1.12595	0.590046		asnT	b1977	-1.21163	NA		asnT	b1977	2.59222	NA			asnT	b1977
asnU	b1986	-1.17124	0.698866		asnU	b1986	1.50484	0.328818		asnU	b1986	0.105188	0.951541			asnU	b1986	-0.641293	0.814431		asnU	b1986	3.30587	0.00507918		asnU	b1986	0.681884	0.667566			asnU	b1986	1.30001	0.481243		asnU	b1986	3.01091	0.0096875		asnU	b1986	0.373366	0.803917			asnU	b1986
asnV	b1989	0.756822	0.799641		asnV	b1989	1.27121	0.630667		asnV	b1989	1.82638	NA			asnV	b1989	0.114735	0.971404		asnV	b1989	2.79535	0.151167		asnV	b1989	2.8152	NA			asnV	b1989	-0.894802	0.743736		asnV	b1989	0.730857	NA		asnV	b1989	0.275191	NA			asnV	b1989
asnW	b1984	3.45062	0.320509		asnW	b1984	1.521	0.613562		asnW	b1984	1.00007	NA			asnW	b1984	3.77068	0.193439		asnW	b1984	1.25252	0.678395		asnW	b1984	0.773954	NA			asnW	b1984	2.30445	0.512906		asnW	b1984	-1.42301	NA		asnW	b1984	-1.20912	NA			asnW	b1984
aspA	b4139	-1.34981	0.0228885		aspA	b4139	-0.891844	0.2051		aspA	b4139	0.419576	0.571073			aspA	b4139	-1.84339	0.000743748		aspA	b4139	-2.01777	0.000662186		aspA	b4139	-0.078175	0.936834			aspA	b4139	-1.36366	0.0201681		aspA	b4139	-2.5119	8.13184e-06		aspA	b4139	0.943069	0.137266			aspA	b4139
aspC	b0928	1.30984	0.000530854		aspC	b0928	0.843814	0.0579445		aspC	b0928	0.882853	0.0329835			aspC	b0928	1.6576	3.24414e-06		aspC	b0928	0.686154	0.136749		aspC	b0928	1.14765	0.00813974			aspC	b0928	1.70608	2.01562e-06		aspC	b0928	1.12051	0.00599323		aspC	b0928	1.93237	1.82845e-07			aspC	b0928
aspS	b1866	0.0732947	0.915893		aspS	b1866	-0.367395	0.569087		aspS	b1866	0.385586	0.502633			aspS	b1866	0.50879	0.31015		aspS	b1866	-0.154486	0.832959		aspS	b1866	0.355376	0.553278			aspS	b1866	0.0325869	0.965288		aspS	b1866	-0.0704292	0.930197		aspS	b1866	0.448812	0.420496			aspS	b1866
aspT	b3760	-1.87948	0.056894		aspT	b3760	-0.860495	0.44053		aspT	b3760	-2.12698	0.0124873			aspT	b3760	-3.20231	0.000459579		aspT	b3760	-0.108808	0.943488		aspT	b3760	-1.57533	0.0976566			aspT	b3760	-1.63393	0.0711394		aspT	b3760	-2.76844	0.00119505		aspT	b3760	-2.75027	0.000792709			aspT	b3760
aspU	b0206	-1.14331	0.31004		aspU	b0206	-0.966935	0.412254		aspU	b0206	-2.07138	0.0243297			aspU	b0206	-3.49635	0.000396991		aspU	b0206	-0.20857	0.888105		aspU	b0206	-1.75616	0.0830594			aspU	b0206	-1.58862	0.104973		aspU	b0206	-2.88468	0.00161529		aspU	b0206	-2.73101	0.00200227			aspU	b0206
aspV	b0216	-2.14326	0.385802		aspV	b0216	1.04609	0.442357		aspV	b0216	-1.32851	0.187475			aspV	b0216	-2.99466	0.163358		aspV	b0216	2.25613	0.0298072		aspV	b0216	0.00665187	0.995903			aspV	b0216	-0.0480074	0.983226		aspV	b0216	-0.635178	0.693153		aspV	b0216	-0.238799	0.856217			aspV	b0216
asr	b1597	-0.0340615	0.977489		asr	b1597	0.196829	0.911924		asr	b1597	-1.70946	0.0619093			asr	b1597	-0.69059	0.497058		asr	b1597	0.9863	0.397512		asr	b1597	-2.09227	0.218233			asr	b1597	-0.833043	0.386863		asr	b1597	1.86114	0.048355		asr	b1597	-0.487452	0.659185			asr	b1597
astA	b1747	-1.1311	0.30724		astA	b1747	-4.03857	7.5018e-06		astA	b1747	-2.25396	0.0166684			astA	b1747	-1.31749	0.1771		astA	b1747	-1.28131	0.241259		astA	b1747	-0.258694	0.855807			astA	b1747	-0.772023	0.500454		astA	b1747	0.874487	0.48382		astA	b1747	1.91212	0.0429284			astA	b1747
astB	b1745	-1.46871	0.153662		astB	b1745	-3.67248	4.04815e-05		astB	b1745	-2.78	0.00214579			astB	b1745	-1.707	0.0649903		astB	b1745	-1.62123	0.118282		astB	b1745	-0.873815	0.449945			astB	b1745	-0.777194	0.492796		astB	b1745	0.69954	0.594779		astB	b1745	0.920254	0.393991			astB	b1745
astC	b1748	-0.259293	0.858191		astC	b1748	-3.33626	0.000476391		astC	b1748	-2.13566	0.0311272			astC	b1748	-0.238385	0.85304		astC	b1748	-0.993486	0.418226		astC	b1748	-0.195619	0.898527			astC	b1748	0.262809	0.849329		astC	b1748	1.01875	0.421701		astC	b1748	2.25616	0.0195742			astC	b1748
astD	b1746	-0.974803	0.356328		astD	b1746	-4.12767	1.09912e-06		astD	b1746	-2.40653	0.00675464			astD	b1746	-1.46563	0.104992		astD	b1746	-1.68352	0.0891344		astD	b1746	-0.688589	0.546063			astD	b1746	-0.768255	0.483865		astD	b1746	0.449232	0.750592		astD	b1746	1.13241	0.253933			astD	b1746
astE	b1744	-0.395851	0.785057		astE	b1744	-5.56312	2.37296e-08		astE	b1744	-3.49505	0.000304022			astE	b1744	-1.33152	0.210449		astE	b1744	-1.94864	0.0727335		astE	b1744	-1.13229	0.349344			astE	b1744	-0.0238491	0.990596		astE	b1744	-0.122178	0.944401		astE	b1744	0.444586	0.738123			astE	b1744
atoA	b2222	-0.292221	0.899657		atoA	b2222	-0.378256	0.880374		atoA	b2222	-0.998272	0.529311			atoA	b2222	-0.991957	0.572484		atoA	b2222	-0.532046	0.808337		atoA	b2222	1.34795	NA			atoA	b2222	-0.492443	0.785993		atoA	b2222	-0.596359	0.787741		atoA	b2222	-1.7922	0.276216			atoA	b2222
atoB	b2224	0.470376	0.661872		atoB	b2224	-1.6946	0.0937927		atoB	b2224	-2.11497	0.00197213			atoB	b2224	-0.559284	0.560587		atoB	b2224	-0.102442	0.936287		atoB	b2224	-0.35288	0.729331			atoB	b2224	-0.23722	0.816813		atoB	b2224	-0.250656	0.827209		atoB	b2224	-1.56189	0.0322241			atoB	b2224
atoC	b2220	-0.0253818	0.980083		atoC	b2220	-0.151936	0.919948		atoC	b2220	0.831168	0.411747			atoC	b2220	-0.72147	0.441236		atoC	b2220	-0.703096	0.545102		atoC	b2220	1.07334	0.365863			atoC	b2220	-0.747283	0.425404		atoC	b2220	0.421527	0.735849		atoC	b2220	1.02493	0.303021			atoC	b2220
atoD	b2221	0.708635	0.679342		atoD	b2221	-1.92095	0.266176		atoD	b2221	-2.03001	0.0671133			atoD	b2221	1.29972	0.282736		atoD	b2221	0.428839	0.787409		atoD	b2221	0.568737	0.690646			atoD	b2221	0.198943	0.905409		atoD	b2221	-1.0709	0.457428		atoD	b2221	-1.23606	0.30891			atoD	b2221
atoE	b2223	0.200229	0.903977		atoE	b2223	1.05796	0.394881		atoE	b2223	-0.98501	0.332019			atoE	b2223	0.854001	0.414322		atoE	b2223	0.919499	0.451078		atoE	b2223	1.175	0.253015			atoE	b2223	0.290025	0.823117		atoE	b2223	0.773116	0.547387		atoE	b2223	-0.863209	0.43187			atoE	b2223
atoS	b2219	-0.207645	0.81922		atoS	b2219	-0.456463	0.607434		atoS	b2219	-0.340215	0.633093			atoS	b2219	-1.45188	0.0219763		atoS	b2219	0.667124	0.343675		atoS	b2219	0.74418	0.278782			atoS	b2219	-0.707409	0.262669		atoS	b2219	0.348145	0.675616		atoS	b2219	-0.292945	0.699135			atoS	b2219
atpA	b3734	2.09345	0.000977341		atpA	b3734	1.51237	0.0346477		atpA	b3734	2.43621	0.000130436			atpA	b3734	1.95376	0.00164298		atpA	b3734	-0.231011	0.822868		atpA	b3734	1.62113	0.0197118			atpA	b3734	1.76697	0.00652711		atpA	b3734	-0.549834	0.558159		atpA	b3734	2.24274	0.000384559			atpA	b3734
atpB	b3738	0.887819	0.249795		atpB	b3738	0.842928	0.322769		atpB	b3738	1.68113	0.0139875			atpB	b3738	0.700976	0.341747		atpB	b3738	0.00139989	0.998888		atpB	b3738	1.16356	0.127447			atpB	b3738	0.801061	0.304268		atpB	b3738	-0.643437	0.484212		atpB	b3738	1.91185	0.00399633			atpB	b3738
atpC	b3731	-0.174706	0.828047		atpC	b3731	0.588717	0.410315		atpC	b3731	1.51497	0.00594467			atpC	b3731	-0.165652	0.814431		atpC	b3731	-0.833216	0.198455		atpC	b3731	0.212505	0.79168			atpC	b3731	0.167467	0.831043		atpC	b3731	-1.82986	0.000899459		atpC	b3731	1.25021	0.0259307			atpC	b3731
atpD	b3732	0.556974	0.50276		atpD	b3732	0.488246	0.603291		atpD	b3732	1.87534	0.00482856			atpD	b3732	0.747504	0.300415		atpD	b3732	-0.329652	0.742442		atpD	b3732	1.40943	0.0521248			atpD	b3732	0.744919	0.339378		atpD	b3732	-0.813198	0.340394		atpD	b3732	2.01204	0.00190878			atpD	b3732
atpE	b3737	-0.815703	0.342221		atpE	b3737	-0.0573146	0.966822		atpE	b3737	1.45756	0.0561206			atpE	b3737	-0.821115	0.295284		atpE	b3737	-0.285729	0.797716		atpE	b3737	1.21133	0.146299			atpE	b3737	-0.479078	0.610649		atpE	b3737	-0.638277	0.525935		atpE	b3737	2.22876	0.00158701			atpE	b3737
atpF	b3736	0.905848	0.197902		atpF	b3736	0.252468	0.788458		atpF	b3736	1.6336	0.0101515			atpF	b3736	0.949673	0.140374		atpF	b3736	-0.377406	0.671877		atpF	b3736	1.16017	0.0992585			atpF	b3736	1.23062	0.0588706		atpF	b3736	-0.97535	0.195027		atpF	b3736	2.08758	0.000516788			atpF	b3736
atpG	b3733	1.79459	0.00715198		atpG	b3733	1.59686	0.0278244		atpG	b3733	2.61659	5.53666e-05			atpG	b3733	1.84539	0.00394255		atpG	b3733	-0.0481493	0.970066		atpG	b3733	1.35366	0.0709246			atpG	b3733	1.71336	0.010523		atpG	b3733	-0.593697	0.526704		atpG	b3733	2.31052	0.00036011			atpG	b3733
atpH	b3735	3.01343	1.23812e-07		atpH	b3735	1.9048	0.00266703		atpH	b3735	2.77229	2.37733e-06			atpH	b3735	3.60182	5.94363e-11		atpH	b3735	0.19396	0.846018		atpH	b3735	1.71468	0.00847465			atpH	b3735	3.26606	5.74193e-09		atpH	b3735	-0.266881	0.791993		atpH	b3735	2.60458	7.50119e-06			atpH	b3735
atpI	b3739	0.683186	0.422449		atpI	b3739	0.0496481	0.970067		atpI	b3739	1.02947	0.184012			atpI	b3739	1.03587	0.149578		atpI	b3739	0.163176	0.886744		atpI	b3739	0.503981	0.583913			atpI	b3739	0.892776	0.258238		atpI	b3739	-0.567092	0.568777		atpI	b3739	1.79077	0.00990949			atpI	b3739
avtA	b3572	1.45914	0.0136013		avtA	b3572	0.874023	0.213562		avtA	b3572	0.602132	0.383539			avtA	b3572	1.3344	0.0186209		avtA	b3572	0.529191	0.484573		avtA	b3572	0.899964	0.192871			avtA	b3572	1.67306	0.00287719		avtA	b3572	1.6604	0.00488442		avtA	b3572	1.29132	0.0292749			avtA	b3572
azoR	b1412	0.347403	0.649659		azoR	b1412	0.678102	0.340499		azoR	b1412	0.428889	0.53887			azoR	b1412	0.81289	0.140785		azoR	b1412	0.212067	0.806937		azoR	b1412	0.014723	0.991			azoR	b1412	0.1082	0.892431		azoR	b1412	1.45016	0.00795339		azoR	b1412	0.930416	0.129281			azoR	b1412
azuC	b4663	0.843902	0.741606		azuC	b4663	2.83458	0.0127991		azuC	b4663	-0.284763	0.876742			azuC	b4663	3.12825	0.0251138		azuC	b4663	0.452584	0.792224		azuC	b4663	0.0815345	0.975733			azuC	b4663	-1.31592	0.590503		azuC	b4663	0.670247	0.687879		azuC	b4663	0.836577	0.588668			azuC	b4663
bacA	b3057	-1.32331	0.0252429		bacA	b3057	-0.715532	0.293272		bacA	b3057	-0.619148	0.304103			bacA	b3057	-0.867196	0.110975		bacA	b3057	-0.266427	0.7367		bacA	b3057	-0.8288	0.225299			bacA	b3057	-0.908149	0.0959569		bacA	b3057	-0.393766	0.597357		bacA	b3057	-0.413109	0.531947			bacA	b3057
baeR	b2079	0.291754	0.656542		baeR	b2079	0.073941	0.927884		baeR	b2079	0.0831123	0.909465			baeR	b2079	0.830655	0.0702692		baeR	b2079	0.247987	0.719248		baeR	b2079	0.465454	0.453667			baeR	b2079	0.409654	0.456822		baeR	b2079	0.8166	0.111858		baeR	b2079	0.160255	0.806502			baeR	b2079
baeS	b2078	0.0684984	0.923372		baeS	b2078	0.245097	0.733261		baeS	b2078	0.139267	0.842385			baeS	b2078	-0.779862	0.117502		baeS	b2078	-0.35265	0.599812		baeS	b2078	0.0750524	0.936228			baeS	b2078	-0.681054	0.170569		baeS	b2078	0.0456173	0.957051		baeS	b2078	-0.449798	0.464903			baeS	b2078
bamA	b0177	-0.0148313	0.974261		bamA	b0177	0.590426	0.147313		bamA	b0177	0.822716	0.0195265			bamA	b0177	-0.1813	0.667958		bamA	b0177	0.22645	0.638188		bamA	b0177	0.527028	0.192871			bamA	b0177	-0.172087	0.716818		bamA	b0177	0.0626799	0.91722		bamA	b0177	1.0051	0.00299327			bamA	b0177
bamB	b2512	-0.1109	0.844984		bamB	b2512	-0.178017	0.75275		bamB	b2512	-1.15191	0.00209651			bamB	b2512	-0.358271	0.396912		bamB	b2512	0.0786442	0.90219		bamB	b2512	-1.12007	0.00423081			bamB	b2512	-0.181064	0.733105		bamB	b2512	-0.530297	0.262152		bamB	b2512	-1.15179	0.00183612			bamB	b2512
bamC	b2477	1.29093	0.000392686		bamC	b2477	0.279848	0.603291		bamC	b2477	0.181126	0.731082			bamC	b2477	1.47295	2.57612e-05		bamC	b2477	-0.339585	0.496888		bamC	b2477	-0.608848	0.173555			bamC	b2477	1.10202	0.00290776		bamC	b2477	-0.345051	0.514603		bamC	b2477	-0.355181	0.443017			bamC	b2477
bamD	b2595	0.305476	0.486731		bamD	b2595	-0.541357	0.192274		bamD	b2595	-0.356106	0.381592			bamD	b2595	0.638496	0.0647459		bamD	b2595	-0.631963	0.108664		bamD	b2595	-0.526607	0.205368			bamD	b2595	0.248166	0.57392		bamD	b2595	-0.602946	0.127081		bamD	b2595	-0.190502	0.676662			bamD	b2595
bamE	b2617	0.101363	0.825658		bamE	b2617	-0.794083	0.00902651		bamE	b2617	-0.16569	0.659402			bamE	b2617	0.153543	0.674288		bamE	b2617	-1.16372	5.17386e-05		bamE	b2617	-0.69481	0.0529248			bamE	b2617	-0.117306	0.772144		bamE	b2617	-0.88473	0.00170136		bamE	b2617	0.126963	0.751162			bamE	b2617
barA	b2786	0.321064	0.609207		barA	b2786	0.376336	0.559348		barA	b2786	0.411189	0.458321			barA	b2786	0.29156	0.596568		barA	b2786	0.648533	0.232439		barA	b2786	0.53001	0.392646			barA	b2786	0.351006	0.533601		barA	b2786	0.275673	0.685764		barA	b2786	0.508817	0.349971			barA	b2786
basR	b4113	-0.202801	0.777717		basR	b4113	-0.251188	0.748432		basR	b4113	-0.0463449	0.953859			basR	b4113	-0.966111	0.0526355		basR	b4113	0.0753068	0.93371		basR	b4113	-0.171778	0.844394			basR	b4113	-0.620526	0.241757		basR	b4113	0.226013	0.775113		basR	b4113	-0.042768	0.95908			basR	b4113
basS	b4112	-0.376829	0.51286		basS	b4112	0.478392	0.417244		basS	b4112	0.266344	0.648765			basS	b4112	-0.727025	0.109902		basS	b4112	0.131823	0.857348		basS	b4112	0.646274	0.267366			basS	b4112	-0.476892	0.334717		basS	b4112	0.604095	0.259254		basS	b4112	0.475842	0.377876			basS	b4112
bax	b3570	-0.290336	0.444239		bax	b3570	0.922591	0.00313878		bax	b3570	-0.88836	0.00305741			bax	b3570	0.70926	0.0162234		bax	b3570	0.484536	0.175238		bax	b3570	-1.66093	2.25632e-08			bax	b3570	0.360185	0.305767		bax	b3570	-0.105903	0.836624		bax	b3570	-1.2785	6.7958e-06			bax	b3570
bcp	b2480	1.57442	0.00210188		bcp	b2480	-0.650219	0.332569		bcp	b2480	-0.253579	0.724521			bcp	b2480	1.44005	0.00349092		bcp	b2480	-1.1764	0.0439129		bcp	b2480	-0.756128	0.275471			bcp	b2480	1.4089	0.00526521		bcp	b2480	0.062019	0.947962		bcp	b2480	0.546218	0.377126			bcp	b2480
bcr	b2182	0.0541013	0.936579		bcr	b2182	-0.218433	0.748611		bcr	b2182	-0.29417	0.614507			bcr	b2182	0.181393	0.754335		bcr	b2182	0.590119	0.281598		bcr	b2182	0.0468193	0.952416			bcr	b2182	0.354911	0.534716		bcr	b2182	-0.206444	0.777957		bcr	b2182	-0.518896	0.324363			bcr	b2182
bcsA	b3533	1.16206	0.0920937		bcsA	b3533	0.164341	0.875394		bcsA	b3533	-0.404437	0.602838			bcsA	b3533	1.09074	0.0834378		bcsA	b3533	0.237003	0.806377		bcsA	b3533	-0.0341741	0.977838			bcsA	b3533	1.0434	0.108589		bcsA	b3533	0.103511	0.920969		bcsA	b3533	-0.831205	0.239844			bcsA	b3533
bcsB	b3532	0.669645	0.308733		bcsB	b3532	0.533176	0.501879		bcsB	b3532	0.220462	0.784308			bcsB	b3532	0.378621	0.552815		bcsB	b3532	0.311706	0.715481		bcsB	b3532	1.07276	0.116899			bcsB	b3532	0.610232	0.324335		bcsB	b3532	0.332967	0.700296		bcsB	b3532	-0.137906	0.876732			bcsB	b3532
bcsC	b3530	0.236071	0.753147		bcsC	b3530	0.1193	0.893677		bcsC	b3530	-0.683951	0.260825			bcsC	b3530	-0.406471	0.50661		bcsC	b3530	0.631912	0.338539		bcsC	b3530	0.0150846	0.988419			bcsC	b3530	0.0561411	0.946815		bcsC	b3530	0.401778	0.603032		bcsC	b3530	-0.804962	0.170192			bcsC	b3530
bcsE	b3536	0.592165	0.19697		bcsE	b3536	0.895779	0.0511659		bcsE	b3536	0.418614	0.392074			bcsE	b3536	0.04367	0.94265		bcsE	b3536	0.541435	0.285297		bcsE	b3536	0.200664	0.738215			bcsE	b3536	0.0996725	0.863696		bcsE	b3536	1.00357	0.0209985		bcsE	b3536	-0.0107648	0.986976			bcsE	b3536
bcsF	b3537	1.73851	0.18518		bcsF	b3537	1.34805	0.387277		bcsF	b3537	0.234447	0.882014			bcsF	b3537	-0.121267	0.948682		bcsF	b3537	-0.417145	0.839018		bcsF	b3537	0.641013	NA			bcsF	b3537	0.85731	0.534924		bcsF	b3537	1.0793	0.487441		bcsF	b3537	-2.33281	0.148736			bcsF	b3537
bcsG	b3538	1.9495	2.1973e-05		bcsG	b3538	0.466015	0.493809		bcsG	b3538	0.216069	0.751777			bcsG	b3538	1.1079	0.0202685		bcsG	b3538	-0.0451334	0.96486		bcsG	b3538	-0.588766	0.386921			bcsG	b3538	1.55689	0.000712803		bcsG	b3538	0.472385	0.480913		bcsG	b3538	-0.423483	0.497741			bcsG	b3538
bcsQ	b3534	1.98571	0.000367552		bcsQ	b3534	1.39161	0.0259377		bcsQ	b3534	0.343149	0.630678			bcsQ	b3534	1.15131	0.0480174		bcsQ	b3534	1.11142	0.0908971		bcsQ	b3534	0.357953	0.659895			bcsQ	b3534	1.62442	0.00287387		bcsQ	b3534	0.952303	0.151039		bcsQ	b3534	-0.23524	0.764215			bcsQ	b3534
bcsZ	b3531	-0.0450532	0.966887		bcsZ	b3531	-0.225341	0.87267		bcsZ	b3531	-0.0876974	0.946431			bcsZ	b3531	-0.295867	0.762202		bcsZ	b3531	0.554513	0.601351		bcsZ	b3531	0.0360809	0.984476			bcsZ	b3531	0.0783367	0.944928		bcsZ	b3531	-0.0216211	0.986085		bcsZ	b3531	-0.0762863	0.952007			bcsZ	b3531
bdcA	b4249	0.98645	0.175108		bdcA	b4249	-0.292756	0.749479		bdcA	b4249	0.0245106	0.982126			bdcA	b4249	0.64168	0.350274		bdcA	b4249	-0.613724	0.43114		bdcA	b4249	0.399465	0.692164			bdcA	b4249	0.267957	0.747933		bdcA	b4249	-0.147987	0.876272		bdcA	b4249	0.139284	0.883517			bdcA	b4249
bdcR	b4251	0.812721	0.54671		bdcR	b4251	-1.54957	0.318084		bdcR	b4251	-0.3113	0.810423			bdcR	b4251	-0.0420975	0.981279		bdcR	b4251	0.305617	0.835879		bdcR	b4251	-2.58903	0.237299			bdcR	b4251	0.384023	0.769669		bdcR	b4251	0.830323	0.485835		bdcR	b4251	-0.00977499	0.994946			bdcR	b4251
bdm	b1481	-2.21118	0.0165863		bdm	b1481	-1.14684	0.329266		bdm	b1481	-1.74682	0.0745765			bdm	b1481	-1.97058	0.0262244		bdm	b1481	-1.02398	0.378396		bdm	b1481	-1.69019	0.133594			bdm	b1481	-0.369378	0.769669		bdm	b1481	-0.0776858	0.964059		bdm	b1481	-1.18778	0.258499			bdm	b1481
beeE	b1151	-2.81319	0.260986		beeE	b1151	3.77228	0.0506682		beeE	b1151	-0.285593	NA			beeE	b1151	-1.2637	0.540407		beeE	b1151	2.24798	0.309278		beeE	b1151	0.108955	NA			beeE	b1151	-0.0588529	0.981364		beeE	b1151	2.39721	0.272122		beeE	b1151	-0.809434	0.684077			beeE	b1151
bepA	b2494	-0.532593	0.270212		bepA	b2494	0.413487	0.456891		bepA	b2494	0.162937	0.783485			bepA	b2494	-0.827399	0.0431511		bepA	b2494	-0.0575911	0.939546		bepA	b2494	-0.131958	0.843892			bepA	b2494	-0.832436	0.0481043		bepA	b2494	0.37316	0.51368		bepA	b2494	0.171075	0.766959			bepA	b2494
betA	b0311	0.995697	0.403994		betA	b0311	1.75778	0.142612		betA	b0311	2.58437	0.015766			betA	b0311	0.312933	0.807081		betA	b0311	0.741551	0.600508		betA	b0311	2.43639	0.0364536			betA	b0311	-0.105361	0.946815		betA	b0311	0.357054	0.835324		betA	b0311	2.5444	0.0173859			betA	b0311
betB	b0312	0.793056	0.517552		betB	b0312	1.09206	0.393311		betB	b0312	1.39651	0.213212			betB	b0312	0.241342	0.853184		betB	b0312	0.239353	0.883547		betB	b0312	1.57369	0.175198			betB	b0312	-0.106767	0.946399		betB	b0312	-0.156947	0.928076		betB	b0312	2.17327	0.0327587			betB	b0312
betI	b0313	1.06823	0.329677		betI	b0313	1.11137	0.360188		betI	b0313	1.56042	0.142122			betI	b0313	0.495043	0.662994		betI	b0313	0.207248	0.897903		betI	b0313	1.40465	0.236989			betI	b0313	0.135758	0.926089		betI	b0313	-0.671467	0.634577		betI	b0313	3.13639	0.000769286			betI	b0313
betT	b0314	-0.201276	0.875179		betT	b0314	0.261345	0.849035		betT	b0314	-0.345729	0.776248			betT	b0314	-0.573557	0.561535		betT	b0314	0.135184	0.928824		betT	b0314	0.0730926	0.963324			betT	b0314	-0.750487	0.4735		betT	b0314	-0.28543	0.843601		betT	b0314	0.248432	0.837824			betT	b0314
bfd	b3337	0.958884	0.161785		bfd	b3337	1.52304	0.00721693		bfd	b3337	0.381586	0.544673			bfd	b3337	0.576441	0.378428		bfd	b3337	1.64852	0.00300993		bfd	b3337	0.355035	0.639037			bfd	b3337	0.781246	0.201094		bfd	b3337	1.9644	0.000123011		bfd	b3337	0.902775	0.0958238			bfd	b3337
bfr	b3336	-1.14583	0.0608025		bfr	b3336	1.19896	0.0593332		bfr	b3336	0.0129738	0.989625			bfr	b3336	-1.83066	0.000765728		bfr	b3336	2.02866	0.000380706		bfr	b3336	0.064208	0.947033			bfr	b3336	-0.593513	0.378525		bfr	b3336	0.92815	0.165982		bfr	b3336	-0.370194	0.612958			bfr	b3336
bglA	b2901	-0.623555	0.153105		bglA	b2901	-1.18061	0.00276483		bglA	b2901	0.0555159	0.9275			bglA	b2901	-0.0455086	0.935514		bglA	b2901	-0.888201	0.029993		bglA	b2901	0.525571	0.268083			bglA	b2901	-0.316099	0.492796		bglA	b2901	-0.225678	0.688394		bglA	b2901	0.665213	0.104581			bglA	b2901
bglB	b3721	0.525869	0.835209		bglB	b3721	0.892801	0.711466		bglB	b3721	-0.845358	NA			bglB	b3721	0.123837	0.95959		bglB	b3721	0.463696	0.862506		bglB	b3721	1.07144	NA			bglB	b3721	0.837707	0.671283		bglB	b3721	0.359981	NA		bglB	b3721	0.581319	NA			bglB	b3721
bglF	b3722	2.03172	0.000218132		bglF	b3722	2.60489	2.17463e-06		bglF	b3722	1.94095	0.00046029			bglF	b3722	2.36022	2.64972e-06		bglF	b3722	1.89892	0.00146003		bglF	b3722	2.09063	0.000830135			bglF	b3722	1.45819	0.00696346		bglF	b3722	2.52556	2.8128e-06		bglF	b3722	2.02537	0.000276169			bglF	b3722
bglG	b3723	2.30673	0.452171		bglG	b3723	3.02122	NA		bglG	b3723	2.70347	NA			bglG	b3723	-0.759955	0.841319		bglG	b3723	2.42584	NA		bglG	b3723	3.07386	NA			bglG	b3723	1.33477	0.680568		bglG	b3723	0.981871	NA		bglG	b3723	2.37207	NA			bglG	b3723
bglH	b3720	0.0798674	0.975022		bglH	b3720	0.931109	NA		bglH	b3720	0.574542	NA			bglH	b3720	-0.18536	0.943549		bglH	b3720	2.89211	NA		bglH	b3720	0.948491	NA			bglH	b3720	0.996019	0.609721		bglH	b3720	2.12973	NA		bglH	b3720	0.4437	NA			bglH	b3720
bglJ	b4366	1.80407	0.00155867		bglJ	b4366	1.97902	0.000468731		bglJ	b4366	1.02079	0.0882723			bglJ	b4366	1.81681	0.000715243		bglJ	b4366	1.28432	0.0408052		bglJ	b4366	-0.518303	0.551723			bglJ	b4366	1.6647	0.00238103		bglJ	b4366	1.54901	0.00795339		bglJ	b4366	0.702646	0.282801			bglJ	b4366
bglX	b2132	0.343487	0.429155		bglX	b2132	-1.11962	0.0027028		bglX	b2132	-0.720627	0.0477482			bglX	b2132	0.487299	0.18013		bglX	b2132	-0.2675	0.575318		bglX	b2132	-0.49509	0.264695			bglX	b2132	0.633455	0.0786082		bglX	b2132	-0.0246932	0.968759		bglX	b2132	-0.206484	0.656636			bglX	b2132
bhsA	b1112	-1.77333	0.207301		bhsA	b1112	-0.973916	0.287879		bhsA	b1112	-2.23123	0.00130993			bhsA	b1112	-1.59958	0.122758		bhsA	b1112	0.259139	0.805167		bhsA	b1112	-0.362681	0.721862			bhsA	b1112	-0.952546	0.304287		bhsA	b1112	-1.13974	0.15708		bhsA	b1112	-2.06716	0.00493227			bhsA	b1112
bioA	b0774	-2.4709	0.0247457		bioA	b0774	-0.327992	0.828141		bioA	b0774	0.440956	0.743205			bioA	b0774	2.66891	0.00331807		bioA	b0774	-1.36473	0.233113		bioA	b0774	1.09069	0.358958			bioA	b0774	-3.0094	0.00195893		bioA	b0774	-4.02242	1.89175e-05		bioA	b0774	1.60131	0.124928			bioA	b0774
bioB	b0775	-2.63336	0.00846415		bioB	b0775	-1.13676	0.322403		bioB	b0775	-0.279678	0.836164			bioB	b0775	2.2079	0.011522		bioB	b0775	-1.72212	0.0940466		bioB	b0775	-0.268229	0.850626			bioB	b0775	-3.96312	1.09374e-05		bioB	b0775	-3.33329	0.000212787		bioB	b0775	1.38667	0.163938			bioB	b0775
bioC	b0777	-4.12434	0.00300496		bioC	b0777	-0.0417492	0.983891		bioC	b0777	0.897156	0.502456			bioC	b0777	1.66235	0.123227		bioC	b0777	-1.19279	0.374742		bioC	b0777	0.786414	0.590003			bioC	b0777	-3.51885	0.00108477		bioC	b0777	-3.22874	0.00356163		bioC	b0777	2.51807	0.0200457			bioC	b0777
bioD	b0778	-2.54727	0.0752677		bioD	b0778	1.50761	0.143829		bioD	b0778	1.32583	0.200925			bioD	b0778	2.74886	0.000827159		bioD	b0778	-0.0603162	0.971024		bioD	b0778	0.918671	0.479784			bioD	b0778	-2.72834	0.0074112		bioD	b0778	-1.29044	0.246734		bioD	b0778	3.25202	0.000185437			bioD	b0778
bioF	b0776	-3.42246	0.00106391		bioF	b0776	-0.561423	0.692033		bioF	b0776	-0.145416	0.925885			bioF	b0776	1.82584	0.0584556		bioF	b0776	-1.65469	0.138749		bioF	b0776	-0.0649327	0.973294			bioF	b0776	-3.9884	2.45273e-05		bioF	b0776	-4.00175	2.43717e-05		bioF	b0776	1.52291	0.150792			bioF	b0776
bioH	b3412	0.975635	0.0521121		bioH	b3412	0.815165	0.147402		bioH	b3412	0.757335	0.132447			bioH	b3412	1.54416	0.000243792		bioH	b3412	1.00696	0.0500914		bioH	b3412	1.12734	0.038039			bioH	b3412	1.26102	0.00361502		bioH	b3412	1.17504	0.0134652		bioH	b3412	1.4353	0.00150045			bioH	b3412
birA	b3973	0.365089	0.614146		birA	b3973	0.6273	0.308091		birA	b3973	0.165308	0.805729			birA	b3973	0.607406	0.27157		birA	b3973	0.821028	0.138721		birA	b3973	0.597612	0.324766			birA	b3973	0.761416	0.152843		birA	b3973	0.17828	0.822637		birA	b3973	-0.277577	0.669194			birA	b3973
bisC	b3551	0.0460239	0.915732		bisC	b3551	-0.705695	0.0254092		bisC	b3551	-0.915512	0.000704271			bisC	b3551	0.425116	0.131653		bisC	b3551	-0.412965	0.224114		bisC	b3551	-1.02945	0.00193163			bisC	b3551	0.376091	0.2085		bisC	b3551	-0.206848	0.603032		bisC	b3551	-0.754501	0.00822504			bisC	b3551
blc	b4149	-2.22031	3.33305e-08		blc	b4149	-0.946676	0.044085		blc	b4149	-1.49529	0.000235326			blc	b4149	-2.61468	8.2503e-12		blc	b4149	-1.24216	0.00581021		blc	b4149	-1.29886	0.00447338			blc	b4149	-2.02698	9.75861e-08		blc	b4149	-0.824408	0.0817096		blc	b4149	-1.20345	0.00418664			blc	b4149
blr	b4409	1.93156	0.0265696		blr	b4409	2.67349	0.000666649		blr	b4409	2.22608	0.00162471			blr	b4409	2.75086	0.000128101		blr	b4409	3.87073	6.60684e-08		blr	b4409	2.29934	0.00380667			blr	b4409	1.98409	0.00892907		blr	b4409	2.60066	0.000640877		blr	b4409	1.3344	0.0993825			blr	b4409
bluF	b1163	0.303389	0.736788		bluF	b1163	1.5019	0.01552		bluF	b1163	1.06428	0.0860963			bluF	b1163	0.244149	0.754133		bluF	b1163	0.581837	0.45263		bluF	b1163	0.406057	0.644522			bluF	b1163	0.318711	0.687794		bluF	b1163	1.69385	0.00396944		bluF	b1163	1.40767	0.0173436			bluF	b1163
bluR	b1162	-1.17502	0.0194208		bluR	b1162	-0.0205972	0.982441		bluR	b1162	-0.397221	0.529037			bluR	b1162	-0.896073	0.0678453		bluR	b1162	0.101029	0.90411		bluR	b1162	-0.631237	0.342561			bluR	b1162	-0.779653	0.139981		bluR	b1162	0.571695	0.367236		bluR	b1162	-0.0122578	0.98759			bluR	b1162
bolA	b0435	-3.44966	3.32934e-06		bolA	b0435	-1.48556	0.103154		bolA	b0435	-2.48306	0.0015306			bolA	b0435	-4.38709	6.90242e-10		bolA	b0435	-0.94979	0.332993		bolA	b0435	-2.53319	0.00164405			bolA	b0435	-3.85146	1.07898e-07		bolA	b0435	-1.85655	0.0304456		bolA	b0435	-2.24239	0.00427075			bolA	b0435
borD	b0557	-0.730162	0.785057		borD	b0557	-1.85462	0.438634		borD	b0557	-4.29094	0.00663451			borD	b0557	-1.38837	0.499715		borD	b0557	1.22306	0.48205		borD	b0557	-0.443429	NA			borD	b0557	-1.0466	0.588787		borD	b0557	-3.09822	0.132468		borD	b0557	-4.43112	0.0125738			borD	b0557
brnQ	b0401	-1.01966	0.244563		brnQ	b0401	-1.17995	0.185794		brnQ	b0401	-1.36926	0.0810716			brnQ	b0401	-1.15804	0.134822		brnQ	b0401	-0.289496	0.798633		brnQ	b0401	0.127388	0.913943			brnQ	b0401	-0.749675	0.401718		brnQ	b0401	-1.00436	0.275923		brnQ	b0401	-1.61592	0.0327587			brnQ	b0401
bsmA	b4189	-5.42757	4.74812e-12		bsmA	b4189	-1.62563	0.0990847		bsmA	b4189	0.821627	0.431665			bsmA	b4189	-6.20636	5.31916e-16		bsmA	b4189	-1.30486	0.200122		bsmA	b4189	1.29811	0.198849			bsmA	b4189	-5.71772	7.12294e-14		bsmA	b4189	-3.27342	0.000116497		bsmA	b4189	1.17201	0.226215			bsmA	b4189
bssR	b0836	-2.76237	4.57081e-05		bssR	b0836	-3.59431	2.85935e-08		bssR	b0836	-3.27475	3.57836e-07			bssR	b0836	-2.82145	1.22958e-05		bssR	b0836	-2.07539	0.00351478		bssR	b0836	-2.23893	0.00122982			bssR	b0836	-3.25926	3.04234e-07		bssR	b0836	-3.28918	5.18662e-07		bssR	b0836	-3.52575	2.53871e-08			bssR	b0836
bssS	b1060	-4.67042	1.02576e-11		bssS	b1060	-4.26371	7.60138e-10		bssS	b1060	-4.44912	3.23095e-11			bssS	b1060	-5.00395	5.82652e-14		bssS	b1060	-2.15296	0.00511636		bssS	b1060	-4.14589	5.11395e-09			bssS	b1060	-5.60349	1.60742e-17		bssS	b1060	-4.44962	6.19699e-11		bssS	b1060	-5.20179	8.46125e-15			bssS	b1060
btuB	b3966	-0.971033	0.0993236		btuB	b3966	-1.35242	0.0101044		btuB	b3966	-1.13932	0.0160482			btuB	b3966	-0.698931	0.176461		btuB	b3966	-0.371513	0.550269		btuB	b3966	-0.446169	0.493371			btuB	b3966	-0.782439	0.118458		btuB	b3966	-0.694521	0.204777		btuB	b3966	-0.466225	0.409829			btuB	b3966
btuC	b1711	-0.793976	0.153662		btuC	b1711	-0.500692	0.391078		btuC	b1711	-1.1526	0.00628484			btuC	b1711	-1.03908	0.0251102		btuC	b1711	0.0179075	0.983438		btuC	b1711	-0.543815	0.332557			btuC	b1711	-1.05979	0.0157637		btuC	b1711	-0.206254	0.761393		btuC	b1711	-1.27198	0.00342582			btuC	b1711
btuD	b1709	1.43648	0.0117699		btuD	b1709	0.904957	0.188411		btuD	b1709	0.374753	0.611197			btuD	b1709	2.22939	1.77267e-05		btuD	b1709	0.590195	0.422055		btuD	b1709	0.234551	0.774269			btuD	b1709	2.05361	0.000131272		btuD	b1709	1.39561	0.0210901		btuD	b1709	0.035636	0.968964			btuD	b1709
btuE	b1710	-0.817422	0.193722		btuE	b1710	0.193236	0.825086		btuE	b1710	-0.527648	0.429675			btuE	b1710	-0.463506	0.459888		btuE	b1710	0.387936	0.61464		btuE	b1710	-0.457109	0.521384			btuE	b1710	-0.124595	0.879564		btuE	b1710	1.34223	0.0223033		btuE	b1710	-0.0311303	0.972618			btuE	b1710
btuF	b0158	0.577727	0.453051		btuF	b0158	0.306851	0.722165		btuF	b0158	0.329722	0.668819			btuF	b0158	1.0255	0.0784712		btuF	b0158	-0.243655	0.787409		btuF	b0158	0.381386	0.685138			btuF	b0158	0.107664	0.900796		btuF	b0158	-0.315182	0.721238		btuF	b0158	0.041914	0.967346			btuF	b0158
btuR	b1270	-0.589275	0.312115		btuR	b1270	-0.103795	0.895797		btuR	b1270	0.300722	0.613187			btuR	b1270	-0.926793	0.052027		btuR	b1270	0.325892	0.611435		btuR	b1270	0.0370934	0.972355			btuR	b1270	-0.928939	0.0469975		btuR	b1270	0.178149	0.810943		btuR	b1270	0.401635	0.487908			btuR	b1270
cadA	b4131	0.352624	0.805275		cadA	b4131	1.18954	0.202699		cadA	b4131	-0.0833782	0.946796			cadA	b4131	0.619822	0.539634		cadA	b4131	0.510998	0.641307		cadA	b4131	2.25929	0.00218808			cadA	b4131	1.21157	0.16077		cadA	b4131	0.120495	0.928384		cadA	b4131	0.0481081	0.968222			cadA	b4131
cadB	b4132	1.80789	0.313517		cadB	b4132	0.430558	0.865197		cadB	b4132	-0.413691	0.834289			cadB	b4132	0.928453	0.609767		cadB	b4132	1.6347	0.3558		cadB	b4132	4.57019	0.000252649			cadB	b4132	0.528994	0.793851		cadB	b4132	0.584817	0.80216		cadB	b4132	-1.24106	0.501274			cadB	b4132
cadC	b4133	0.5897	0.571345		cadC	b4133	-0.131299	0.920047		cadC	b4133	-0.950391	0.258631			cadC	b4133	-1.15033	0.22155		cadC	b4133	0.489135	0.641307		cadC	b4133	-1.33969	0.20242			cadC	b4133	-0.654632	0.496912		cadC	b4133	-0.611651	0.570204		cadC	b4133	-2.16456	0.00926424			cadC	b4133
caiA	b0039	-0.115791	0.896456		caiA	b0039	-0.165065	0.838498		caiA	b0039	0.271421	0.691868			caiA	b0039	0.528235	0.357125		caiA	b0039	-1.00379	0.0835055		caiA	b0039	0.0244556	0.983396			caiA	b0039	0.70056	0.205034		caiA	b0039	-0.995813	0.0722055		caiA	b0039	-0.0527639	0.950055			caiA	b0039
caiB	b0038	-0.270153	0.85977		caiB	b0038	0.0271878	0.988182		caiB	b0038	0.430103	0.720248			caiB	b0038	-0.165496	0.896617		caiB	b0038	-0.817718	0.508592		caiB	b0038	0.300437	0.84127			caiB	b0038	-0.181185	0.893286		caiB	b0038	0.258081	0.860103		caiB	b0038	-0.0945841	0.94673			caiB	b0038
caiC	b0037	0.514876	0.588636		caiC	b0037	-0.0713266	0.955606		caiC	b0037	-1.05173	0.112766			caiC	b0037	0.049804	0.963381		caiC	b0037	-0.150588	0.887404		caiC	b0037	-0.57258	0.571086			caiC	b0037	0.549164	0.470818		caiC	b0037	-0.509569	0.572348		caiC	b0037	-1.54184	0.0322241			caiC	b0037
caiD	b0036	0.0194229	0.988909		caiD	b0036	0.564805	0.736025		caiD	b0036	0.0655356	0.974304			caiD	b0036	0.418126	0.755978		caiD	b0036	-0.924291	0.567771		caiD	b0036	0.920338	0.587415			caiD	b0036	0.0100666	0.996115		caiD	b0036	-0.16133	0.933197		caiD	b0036	0.421263	0.797972			caiD	b0036
caiE	b0035	-0.0790706	0.949047		caiE	b0035	-1.81187	0.0838094		caiE	b0035	-1.15424	0.199916			caiE	b0035	-0.462474	0.643612		caiE	b0035	-1.20701	0.232061		caiE	b0035	-1.38029	0.23143			caiE	b0035	-0.24524	0.829258		caiE	b0035	-2.41136	0.00694152		caiE	b0035	-2.05432	0.0238265			caiE	b0035
caiF	b0034	-1.26943	0.27638		caiF	b0034	-1.30562	0.285122		caiF	b0034	-1.49757	0.14572			caiF	b0034	-1.87188	0.0585572		caiF	b0034	-1.77774	0.113512		caiF	b0034	-1.2941	0.308768			caiF	b0034	-1.9904	0.0400407		caiF	b0034	-2.44554	0.0163921		caiF	b0034	-1.43847	0.181112			caiF	b0034
caiT	b0040	-0.026467	0.988798		caiT	b0040	-0.713098	0.7261		caiT	b0040	-0.806357	0.673395			caiT	b0040	0.59355	0.725854		caiT	b0040	-0.846395	0.644582		caiT	b0040	0.677877	0.760829			caiT	b0040	0.244903	0.900251		caiT	b0040	-0.174091	0.935937		caiT	b0040	0.220875	0.918427			caiT	b0040
can	b0126	0.615147	0.119591		can	b0126	0.536288	0.210729		can	b0126	1.07322	0.00225706			can	b0126	1.23359	0.000168995		can	b0126	0.291386	0.535139		can	b0126	0.670078	0.110479			can	b0126	0.741	0.0410545		can	b0126	0.388278	0.399543		can	b0126	1.2892	0.000151019			can	b0126
carA	b0032	0.306681	0.851696		carA	b0032	1.29254	0.340499		carA	b0032	1.11048	0.399005			carA	b0032	3.50764	0.000477605		carA	b0032	-3.10483	0.00699124		carA	b0032	1.63804	0.20611			carA	b0032	0.294813	0.849697		carA	b0032	-1.73021	0.173291		carA	b0032	3.64726	0.000479952			carA	b0032
carB	b0033	0.359619	0.805843		carB	b0033	0.036606	0.985098		carB	b0033	-0.0489912	0.979356			carB	b0033	3.67459	6.67151e-05		carB	b0033	-4.38469	7.06788e-06		carB	b0033	0.398331	0.782692			carB	b0033	0.998905	0.408413		carB	b0033	-3.10835	0.00211889		carB	b0033	2.38681	0.0182199			carB	b0033
casA	b2760	1.4324	0.194092		casA	b2760	0.948002	0.475063		casA	b2760	-0.213631	0.87733			casA	b2760	0.383191	0.760724		casA	b2760	1.47408	0.190275		casA	b2760	-1.07247	0.495474			casA	b2760	0.671349	0.573576		casA	b2760	0.790601	0.554261		casA	b2760	-1.51656	0.19889			casA	b2760
casB	b2759	-0.795278	0.791167		casB	b2759	1.36773	NA		casB	b2759	1.40151	NA			casB	b2759	-0.753469	0.747752		casB	b2759	1.57918	NA		casB	b2759	1.87323	NA			casB	b2759	0.66505	0.737575		casB	b2759	1.3086	NA		casB	b2759	0.0578979	NA			casB	b2759
casC	b2758	0.0271653	0.980083		casC	b2758	0.816228	0.505647		casC	b2758	0.797307	0.39736			casC	b2758	-0.399062	0.706093		casC	b2758	0.268726	0.851336		casC	b2758	-0.279343	0.87337			casC	b2758	0.348198	0.736575		casC	b2758	1.12637	0.267621		casC	b2758	0.331624	0.778723			casC	b2758
casD	b2757	0.264774	0.886212		casD	b2757	-1.31439	0.394245		casD	b2757	0.0158921	0.994263			casD	b2757	-0.878227	0.554846		casD	b2757	-0.0795507	0.967531		casD	b2757	-0.0158773	0.993777			casD	b2757	0.131517	0.937308		casD	b2757	0.0698074	0.968759		casD	b2757	0.33876	0.824962			casD	b2757
casE	b2756	-0.98752	0.504361		casE	b2756	-0.602513	0.711466		casE	b2756	-1.39975	0.194625			casE	b2756	-0.823234	0.486632		casE	b2756	-0.126634	0.94502		casE	b2756	-2.27467	0.204904			casE	b2756	-1.06221	0.349239		casE	b2756	0.108133	0.950189		casE	b2756	-1.04263	0.377983			casE	b2756
cbdA	b0978	1.08623	0.22435		cbdA	b0978	-0.293854	0.800814		cbdA	b0978	0.680264	0.436641			cbdA	b0978	-0.324104	0.749813		cbdA	b0978	0.344935	0.764959		cbdA	b0978	1.16999	0.164211			cbdA	b0978	0.285809	0.787177		cbdA	b0978	0.221035	0.859054		cbdA	b0978	-0.41939	0.666918			cbdA	b0978
cbdB	b0979	-0.574871	0.588636		cbdB	b0979	0.034597	0.980658		cbdB	b0979	0.37905	0.691868			cbdB	b0979	0.128312	0.900927		cbdB	b0979	-0.0607768	0.967053		cbdB	b0979	0.640981	0.489758			cbdB	b0979	-0.090824	0.938671		cbdB	b0979	-0.0642259	0.961563		cbdB	b0979	-0.000526212	0.999535			cbdB	b0979
cbdX	b4592	-2.75089	0.226477		cbdX	b4592	-0.635954	0.68405		cbdX	b4592	0.773809	0.468403			cbdX	b4592	-2.21573	0.268832		cbdX	b4592	-0.314549	0.834107		cbdX	b4592	1.27389	0.268426			cbdX	b4592	-0.654525	0.671283		cbdX	b4592	0.58037	0.651696		cbdX	b4592	-0.217802	0.879773			cbdX	b4592
cbeA	b2004	0.905035	0.346503		cbeA	b2004	0.259385	0.84098		cbeA	b2004	-0.0374545	0.977774			cbeA	b2004	0.345093	0.72971		cbeA	b2004	-0.024708	0.988538		cbeA	b2004	-0.855005	0.471923			cbeA	b2004	0.587935	0.533601		cbeA	b2004	-0.227288	0.859987		cbeA	b2004	-0.590367	0.551365			cbeA	b2004
cbl	b1987	-0.994253	0.458065		cbl	b1987	-1.22815	0.366996		cbl	b1987	-3.61849	0.00039354			cbl	b1987	-0.756785	0.543535		cbl	b1987	2.30746	0.0435959		cbl	b1987	-1.2318	0.330759			cbl	b1987	-0.819015	0.541829		cbl	b1987	3.05329	0.00452737		cbl	b1987	-0.103659	0.94947			cbl	b1987
cbpA	b1000	-1.23729	0.047561		cbpA	b1000	-0.84232	0.252643		cbpA	b1000	-0.344494	0.664187			cbpA	b1000	-1.80993	0.00133948		cbpA	b1000	-0.770578	0.288237		cbpA	b1000	-0.560528	0.458401			cbpA	b1000	-1.38594	0.0215428		cbpA	b1000	-0.410273	0.644136		cbpA	b1000	-0.715503	0.295864			cbpA	b1000
cbpM	b0999	-0.861612	0.199009		cbpM	b0999	0.242543	0.785216		cbpM	b0999	-0.208984	0.803624			cbpM	b0999	-0.940743	0.120057		cbpM	b0999	-0.582041	0.443723		cbpM	b0999	-0.363916	0.651419			cbpM	b0999	-0.926052	0.147326		cbpM	b0999	-0.483718	0.563266		cbpM	b0999	-1.32416	0.0277631			cbpM	b0999
cbrA	b3690	0.0442243	0.968552		cbrA	b3690	0.225188	0.860672		cbrA	b3690	0.814434	0.386989			cbrA	b3690	0.0428354	0.973415		cbrA	b3690	0.569276	0.577037		cbrA	b3690	1.04658	0.351883			cbrA	b3690	-1.18538	0.177146		cbrA	b3690	-0.00789694	0.994384		cbrA	b3690	0.636201	0.545739			cbrA	b3690
cbrB	b3716	0.279214	0.868375		cbrB	b3716	0.768888	0.577437		cbrB	b3716	-1.00212	0.466104			cbrB	b3716	-0.685407	0.615735		cbrB	b3716	-0.0211047	0.993238		cbrB	b3716	0.875037	0.570691			cbrB	b3716	-0.997685	0.428528		cbrB	b3716	0.250949	0.87394		cbrB	b3716	0.670101	0.621898			cbrB	b3716
cbrC	b3717	-3.03477	0.104576		cbrC	b3717	-1.27699	0.308091		cbrC	b3717	0.0592021	0.962256			cbrC	b3717	-0.819686	0.425825		cbrC	b3717	0.0784004	0.957736		cbrC	b3717	0.784156	0.479055			cbrC	b3717	-0.834131	0.379495		cbrC	b3717	-0.583517	0.602926		cbrC	b3717	-0.0552542	0.967346			cbrC	b3717
cbtA	b2005	-0.667407	0.628107		cbtA	b2005	-0.633836	0.647054		cbtA	b2005	-2.2722	0.00945781			cbtA	b2005	-4.46425	0.0110244		cbtA	b2005	0.973206	0.379031		cbtA	b2005	-2.68196	0.0204866			cbtA	b2005	-2.15477	0.0357164		cbtA	b2005	-1.77817	0.0953396		cbtA	b2005	-2.50469	0.00623634			cbtA	b2005
cca	b3056	0.00856859	0.986584		cca	b3056	-0.338497	0.571414		cca	b3056	-1.15479	0.00675206			cca	b3056	-0.149077	0.783781		cca	b3056	-0.1497	0.823345		cca	b3056	-1.21466	0.00655723			cca	b3056	0.0418273	0.95169		cca	b3056	-0.685315	0.17547		cca	b3056	-1.75317	1.23649e-05			cca	b3056
ccmA	b2201	0.292055	0.800167		ccmA	b2201	-1.00883	0.257272		ccmA	b2201	-1.06857	0.163228			ccmA	b2201	0.428081	0.633437		ccmA	b2201	-0.08343	0.94892		ccmA	b2201	-0.724861	0.436396			ccmA	b2201	-0.0637498	0.957739		ccmA	b2201	-1.87086	0.0117481		ccmA	b2201	-1.43791	0.0560629			ccmA	b2201
ccmB	b2200	1.52061	0.122835		ccmB	b2200	0.16194	0.909689		ccmB	b2200	0.484664	0.642658			ccmB	b2200	1.77777	0.0308369		ccmB	b2200	1.04321	0.267162		ccmB	b2200	0.81591	0.484511			ccmB	b2200	1.27621	0.150218		ccmB	b2200	-0.229303	0.862133		ccmB	b2200	0.690978	0.495701			ccmB	b2200
ccmC	b2199	1.14746	0.35621		ccmC	b2199	0.93108	0.526757		ccmC	b2199	-0.58047	0.665281			ccmC	b2199	0.606375	0.620214		ccmC	b2199	2.31208	0.0344738		ccmC	b2199	1.41936	0.240602			ccmC	b2199	0.935047	0.423588		ccmC	b2199	0.327877	0.852608		ccmC	b2199	-0.25528	0.869796			ccmC	b2199
ccmD	b2198	-1.3121	0.641317		ccmD	b2198	0.791139	0.739599		ccmD	b2198	1.40393	NA			ccmD	b2198	-0.213128	0.932826		ccmD	b2198	0.871278	0.69952		ccmD	b2198	-1.48395	NA			ccmD	b2198	0.12789	0.959444		ccmD	b2198	-0.458105	NA		ccmD	b2198	0.636781	NA			ccmD	b2198
ccmE	b2197	0.216139	0.899393		ccmE	b2197	-1.07693	0.440079		ccmE	b2197	-1.02177	0.419966			ccmE	b2197	0.619655	0.610653		ccmE	b2197	-0.202922	0.90219		ccmE	b2197	-0.45744	0.802235			ccmE	b2197	0.619834	0.629813		ccmE	b2197	-1.39083	0.255917		ccmE	b2197	-0.962033	0.48311			ccmE	b2197
ccmF	b2196	0.605744	0.450845		ccmF	b2196	-1.1065	0.239396		ccmF	b2196	-0.828035	0.271769			ccmF	b2196	-0.272522	0.74357		ccmF	b2196	0.816131	0.303018		ccmF	b2196	0.0449427	0.975469			ccmF	b2196	0.397629	0.618294		ccmF	b2196	-0.288314	0.786373		ccmF	b2196	-0.767991	0.337586			ccmF	b2196
ccmH	b2194	0.303275	0.731293		ccmH	b2194	0.966182	0.194374		ccmH	b2194	-0.543773	0.45255			ccmH	b2194	-0.116575	0.889955		ccmH	b2194	0.911011	0.213419		ccmH	b2194	-0.285503	0.754048			ccmH	b2194	-0.137579	0.877966		ccmH	b2194	-0.401104	0.665904		ccmH	b2194	-1.30102	0.0476144			ccmH	b2194
cdaR	b0162	-0.852092	0.210974		cdaR	b0162	0.0818377	0.93513		cdaR	b0162	0.911282	0.147872			cdaR	b0162	-0.85593	0.150526		cdaR	b0162	-0.334968	0.69617		cdaR	b0162	0.404627	0.642077			cdaR	b0162	-0.252977	0.744186		cdaR	b0162	-0.284057	0.759779		cdaR	b0162	0.656938	0.338537			cdaR	b0162
cdd	b2143	-0.122206	0.878957		cdd	b2143	-1.43998	0.006595		cdd	b2143	-0.854102	0.109023			cdd	b2143	0.193292	0.764238		cdd	b2143	-0.420519	0.521586		cdd	b2143	-0.43772	0.493371			cdd	b2143	-0.0135414	0.989248		cdd	b2143	-1.35603	0.00855332		cdd	b2143	-0.260972	0.694403			cdd	b2143
cdh	b3918	-0.112291	0.916947		cdh	b3918	0.978072	0.202423		cdh	b3918	1.51895	0.0143075			cdh	b3918	-0.249181	0.769623		cdh	b3918	0.953011	0.198945		cdh	b3918	1.91866	0.00415353			cdh	b3918	-0.156105	0.8609		cdh	b3918	1.26219	0.0600897		cdh	b3918	1.13217	0.0943907			cdh	b3918
cdsA	b0175	0.776082	0.148323		cdsA	b0175	1.31656	0.00980379		cdsA	b0175	0.74508	0.162137			cdsA	b0175	0.653734	0.199163		cdsA	b0175	1.30576	0.01066		cdsA	b0175	0.928349	0.0880571			cdsA	b0175	0.31346	0.618294		cdsA	b0175	0.543983	0.390439		cdsA	b0175	0.407243	0.497741			cdsA	b0175
cedA	b1731	1.94801	0.151834		cedA	b1731	0.877998	0.524328		cedA	b1731	0.873597	0.370476			cedA	b1731	2.14324	0.0563928		cedA	b1731	2.64022	0.00510718		cedA	b1731	0.989794	0.387359			cedA	b1731	2.43269	0.0222427		cedA	b1731	1.08932	0.356671		cedA	b1731	0.640184	0.557982			cedA	b1731
cfa	b1661	-1.38842	0.00506412		cfa	b1661	-0.90819	0.117487		cfa	b1661	-1.14551	0.0262056			cfa	b1661	-1.98158	1.69744e-05		cfa	b1661	-1.24896	0.0193591		cfa	b1661	-1.52937	0.00279215			cfa	b1661	-1.92438	4.55209e-05		cfa	b1661	-0.638171	0.317995		cfa	b1661	-1.56353	0.00128849			cfa	b1661
chaA	b1216	-0.634055	0.446062		chaA	b1216	-0.319802	0.744132		chaA	b1216	0.613869	0.441246			chaA	b1216	-0.920559	0.19038		chaA	b1216	0.958615	0.214462		chaA	b1216	1.13957	0.130397			chaA	b1216	-0.90648	0.216795		chaA	b1216	0.225903	0.836624		chaA	b1216	0.804761	0.284309			chaA	b1216
chaB	b1217	-3.45732	8.05592e-05		chaB	b1217	-1.0333	0.35888		chaB	b1217	-1.01678	0.31548			chaB	b1217	-4.71485	3.40234e-08		chaB	b1217	-0.687154	0.560016		chaB	b1217	-1.91402	0.050545			chaB	b1217	-3.17433	0.000122204		chaB	b1217	0.281234	0.847597		chaB	b1217	-0.852879	0.412688			chaB	b1217
chaC	b1218	0.107534	0.916947		chaC	b1218	-1.2494	0.122717		chaC	b1218	-2.07825	0.00211904			chaC	b1218	0.396894	0.631509		chaC	b1218	1.06476	0.186633		chaC	b1218	-1.19601	0.125603			chaC	b1218	0.470372	0.596379		chaC	b1218	1.48563	0.0485163		chaC	b1218	-1.17907	0.108331			chaC	b1218
chbA	b1736	-1.82465	0.187241		chbA	b1736	-1.5854	0.186193		chbA	b1736	-3.82923	0.000109855			chbA	b1736	-0.685963	0.483085		chbA	b1736	0.591754	0.552094		chbA	b1736	-1.45906	0.223679			chbA	b1736	-0.893035	0.324931		chbA	b1736	-0.7481	0.469076		chbA	b1736	-0.942322	0.27979			chbA	b1736
chbB	b1738	-3.80113	0.000261053		chbB	b1738	-1.71192	0.0937802		chbB	b1738	-1.61496	0.0519921			chbB	b1738	-4.24721	5.74679e-06		chbB	b1738	-0.161593	0.905079		chbB	b1738	-2.14249	0.0486973			chbB	b1738	-2.96825	0.000105131		chbB	b1738	-1.30063	0.171282		chbB	b1738	-0.561382	0.582791			chbB	b1738
chbC	b1737	-0.642551	0.572112		chbC	b1737	0.123032	0.934097		chbC	b1737	-0.308702	0.78828			chbC	b1737	-1.08194	0.240843		chbC	b1737	1.10466	0.274973		chbC	b1737	0.226141	0.863151			chbC	b1737	-0.66156	0.514379		chbC	b1737	-0.180136	0.901315		chbC	b1737	-0.560239	0.599806			chbC	b1737
chbF	b1734	-1.61841	0.099195		chbF	b1734	-1.2957	0.106658		chbF	b1734	-1.01399	0.155283			chbF	b1734	-2.02066	0.0125646		chbF	b1734	-0.719991	0.347805		chbF	b1734	0.450234	0.63996			chbF	b1734	-0.893261	0.195656		chbF	b1734	-0.516485	0.523985		chbF	b1734	0.178991	0.843776			chbF	b1734
chbG	b1733	-0.720305	0.353153		chbG	b1733	-0.653925	0.364847		chbG	b1733	-0.626774	0.297931			chbG	b1733	-0.814254	0.194963		chbG	b1733	-0.682717	0.307885		chbG	b1733	-0.936858	0.207614			chbG	b1733	-0.509026	0.43699		chbG	b1733	-0.114285	0.896336		chbG	b1733	-0.920162	0.120911			chbG	b1733
chbR	b1735	0.474985	0.672006		chbR	b1735	-2.02749	0.0367867		chbR	b1735	-1.43623	0.0582068			chbR	b1735	0.189992	0.858636		chbR	b1735	0.135791	0.914259		chbR	b1735	-1.64808	0.0973287			chbR	b1735	0.6122	0.511587		chbR	b1735	-1.2616	0.144678		chbR	b1735	-1.39017	0.08235			chbR	b1735
cheA	b1888	1.13609	0.120032		cheA	b1888	0.366667	0.722064		cheA	b1888	-0.159003	0.867005			cheA	b1888	0.0101343	0.993405		cheA	b1888	0.0849267	0.944847		cheA	b1888	-1.2998	0.301791			cheA	b1888	0.685342	0.334358		cheA	b1888	-0.000139059	0.999815		cheA	b1888	-0.972657	0.238162			cheA	b1888
cheB	b1883	1.10831	0.452415		cheB	b1883	0.999973	0.571414		cheB	b1883	-0.250725	0.890422			cheB	b1883	-1.00995	0.527423		cheB	b1883	0.578029	0.764714		cheB	b1883	1.6227	0.253743			cheB	b1883	1.24608	0.32861		cheB	b1883	-0.0402043	0.984641		cheB	b1883	-0.418801	0.815021			cheB	b1883
cheR	b1884	1.47002	0.210326		cheR	b1884	0.247277	0.892776		cheR	b1884	0.758947	0.564664			cheR	b1884	0.211225	0.884935		cheR	b1884	0.707012	0.616952		cheR	b1884	2.07703	0.0915929			cheR	b1884	0.67253	0.590046		cheR	b1884	0.626522	0.669166		cheR	b1884	0.566395	0.703701			cheR	b1884
cheW	b1887	1.25317	0.370192		cheW	b1887	0.472445	0.799856		cheW	b1887	0.494195	0.768777			cheW	b1887	0.764546	0.568788		cheW	b1887	0.688729	0.676149		cheW	b1887	1.34579	0.420459			cheW	b1887	0.508626	0.737795		cheW	b1887	0.829347	0.604776		cheW	b1887	0.564242	0.741918			cheW	b1887
cheY	b1882	-0.273809	0.873815		cheY	b1882	-0.676918	0.699168		cheY	b1882	-2.17306	0.0914317			cheY	b1882	0.182643	0.891955		cheY	b1882	-0.180528	0.919926		cheY	b1882	-2.14993	0.353211			cheY	b1882	0.668468	0.569156		cheY	b1882	0.961026	0.45137		cheY	b1882	-0.144277	0.928923			cheY	b1882
cheZ	b1881	-0.284501	0.818315		cheZ	b1881	0.38798	0.717197		cheZ	b1881	-0.237776	0.798208			cheZ	b1881	0.9188	0.192317		cheZ	b1881	0.355184	0.729991		cheZ	b1881	-0.552206	0.635282			cheZ	b1881	0.65447	0.394378		cheZ	b1881	0.501584	0.60072		cheZ	b1881	-0.508989	0.567232			cheZ	b1881
chiA	b3338	1.26513	0.00679406		chiA	b3338	0.162973	0.8216		chiA	b3338	-0.578113	0.261075			chiA	b3338	0.709762	0.14174		chiA	b3338	0.718974	0.17848		chiA	b3338	-0.649795	0.236169			chiA	b3338	0.815662	0.0940327		chiA	b3338	-0.34853	0.597357		chiA	b3338	-1.1793	0.00990949			chiA	b3338
chiP	b0681	-1.25966	0.272604		chiP	b0681	-0.285238	0.8216		chiP	b0681	-0.259879	0.810423			chiP	b0681	-2.33343	0.0218145		chiP	b0681	-0.258281	0.830604		chiP	b0681	0.332669	0.797354			chiP	b0681	-0.605705	0.49864		chiP	b0681	-0.404913	0.724914		chiP	b0681	0.779592	0.378827			chiP	b0681
chiQ	b0682	-1.77932	0.193321		chiQ	b0682	-0.836663	0.393311		chiQ	b0682	-0.650476	0.443295			chiQ	b0682	0.077232	0.946735		chiQ	b0682	-0.664784	0.477971		chiQ	b0682	-0.678928	0.540905			chiQ	b0682	-0.988892	0.269114		chiQ	b0682	-1.37506	0.08728		chiQ	b0682	-0.396504	0.68153			chiQ	b0682
chiX	b4585	-0.639355	0.666495		chiX	b4585	0.443716	0.713679		chiX	b4585	-2.80975	0.000149273			chiX	b4585	-0.642093	0.575761		chiX	b4585	-0.433459	0.7277		chiX	b4585	-6.88078	0.000257897			chiX	b4585	-0.939755	0.374588		chiX	b4585	-0.193886	0.88695		chiX	b4585	-1.76138	0.0236089			chiX	b4585
cho	b1741	0.0615564	0.956954		cho	b1741	0.230566	0.809373		cho	b1741	-0.102326	0.918551			cho	b1741	0.480596	0.554846		cho	b1741	-0.0596646	0.962096		cho	b1741	0.747074	0.388167			cho	b1741	-0.239788	0.799127		cho	b1741	-0.283302	0.772557		cho	b1741	0.253514	0.779808			cho	b1741
chpB	b4225	-1.8657	0.0430958		chpB	b4225	-1.77728	0.0990847		chpB	b4225	-1.54887	0.0440684			chpB	b4225	-2.56077	0.00182545		chpB	b4225	-0.603362	0.561276		chpB	b4225	-1.62697	0.149261			chpB	b4225	-2.16731	0.00247471		chpB	b4225	-0.29467	0.803968		chpB	b4225	-1.15868	0.169971			chpB	b4225
chpS	b4224	-3.65626	3.72019e-06		chpS	b4224	-3.17935	0.00031416		chpS	b4224	-2.35328	0.000640492			chpS	b4224	-3.1194	2.07595e-06		chpS	b4224	-1.57132	0.041493		chpS	b4224	-2.12868	0.0258834			chpS	b4224	-3.36796	4.76112e-08		chpS	b4224	-1.48166	0.0439784		chpS	b4224	-1.2985	0.0812164			chpS	b4224
chrR	b3713	-0.37676	0.616676		chrR	b3713	-0.953213	0.167888		chrR	b3713	0.0519814	0.955447			chrR	b3713	0.012528	0.990795		chrR	b3713	-0.210817	0.813071		chrR	b3713	-0.147539	0.87337			chrR	b3713	-0.369801	0.620531		chrR	b3713	0.854652	0.219575		chrR	b3713	0.905764	0.152701			chrR	b3713
cirA	b2155	-0.113346	0.904409		cirA	b2155	-0.351352	0.699056		cirA	b2155	0.461447	0.55901			cirA	b2155	1.24725	0.0399982		cirA	b2155	-1.80457	0.00581455		cirA	b2155	0.230135	0.806673			cirA	b2155	0.984137	0.14002		cirA	b2155	-0.702132	0.383031		cirA	b2155	1.13404	0.087853			cirA	b2155
citA	b0619	-0.302905	0.733057		citA	b0619	-1.10593	0.0988812		citA	b0619	-1.05988	0.0593911			citA	b0619	0.384844	0.569531		citA	b0619	0.628097	0.354457		citA	b0619	-0.704439	0.301791			citA	b0619	0.36285	0.617523		citA	b0619	0.474062	0.524408		citA	b0619	-0.702236	0.250847			citA	b0619
citB	b0620	0.0299716	0.976644		citB	b0620	-0.0223856	0.985098		citB	b0620	-0.500553	0.474672			citB	b0620	-1.17761	0.168344		citB	b0620	0.510008	0.50494		citB	b0620	-0.417678	0.648494			citB	b0620	-0.554451	0.498364		citB	b0620	-0.176645	0.855162		citB	b0620	-0.864382	0.203031			citB	b0620
citC	b0618	1.51975	0.431275		citC	b0618	-1.94595	0.20779		citC	b0618	-0.516869	0.738468			citC	b0618	1.2235	0.472495		citC	b0618	0.0730897	0.971024		citC	b0618	0.390702	0.829893			citC	b0618	1.3665	0.412703		citC	b0618	-0.651288	0.692989		citC	b0618	-1.88144	0.190777			citC	b0618
citD	b0617	0.492641	0.811964		citD	b0617	-2.3397	0.189646		citD	b0617	0.0419886	NA			citD	b0617	0.0103431	0.996321		citD	b0617	-1.25658	0.412564		citD	b0617	-1.42666	NA			citD	b0617	-0.325338	0.857475		citD	b0617	-0.990403	0.524408		citD	b0617	0.198286	0.919022			citD	b0617
citE	b0616	0.582596	0.683338		citE	b0616	-0.734231	0.595538		citE	b0616	-0.0827662	0.954184			citE	b0616	0.891256	0.406793		citE	b0616	0.192415	0.898993		citE	b0616	-0.20515	0.901204			citE	b0616	0.91588	0.408084		citE	b0616	0.418971	0.765451		citE	b0616	0.119593	0.930423			citE	b0616
citF	b0615	1.04531	0.54268		citF	b0615	-1.30599	0.420304		citF	b0615	-0.027812	0.989625			citF	b0615	0.242865	0.894316		citF	b0615	-1.14158	0.471871		citF	b0615	-0.557425	0.771504			citF	b0615	0.238301	0.901356		citF	b0615	-1.58729	0.290704		citF	b0615	-0.854193	0.597906			citF	b0615
citG	b0613	-0.172582	0.949637		citG	b0613	-1.21623	0.592893		citG	b0613	-0.102002	NA			citG	b0613	0.290606	0.894515		citG	b0613	-0.136729	0.963371		citG	b0613	0.488243	NA			citG	b0613	0.280096	0.902141		citG	b0613	-0.293781	0.902939		citG	b0613	-0.321519	0.885361			citG	b0613
citT	b0612	1.02879	0.304257		citT	b0612	-0.747828	0.528834		citT	b0612	-0.72651	0.403886			citT	b0612	-0.0675435	0.958414		citT	b0612	0.44939	0.677149		citT	b0612	-0.162535	0.902011			citT	b0612	-0.469546	0.664657		citT	b0612	-0.0873145	0.949494		citT	b0612	-1.04004	0.238162			citT	b0612
citX	b0614	0.55822	0.683338		citX	b0614	-0.975745	0.402887		citX	b0614	-0.943999	0.339173			citX	b0614	1.58735	0.0836243		citX	b0614	-0.559923	0.645904		citX	b0614	-1.60589	0.153814			citX	b0614	1.58388	0.0914832		citX	b0614	-1.84248	0.0581383		citX	b0614	-0.825389	0.42456			citX	b0614
clcA	b0155	-0.912459	0.0205737		clcA	b0155	-1.03485	0.0106643		clcA	b0155	-1.29189	0.000346257			clcA	b0155	-2.09043	2.85636e-09		clcA	b0155	-0.428929	0.365312		clcA	b0155	-1.29753	0.000997472			clcA	b0155	-1.22827	0.000605771		clcA	b0155	-0.82942	0.0432112		clcA	b0155	-1.77473	5.37062e-07			clcA	b0155
clcB	b1592	-1.8829	0.0106767		clcB	b1592	-2.94611	1.00639e-05		clcB	b1592	-2.10273	0.00139062			clcB	b1592	-1.96051	0.00338445		clcB	b1592	-1.77386	0.0121984		clcB	b1592	-1.4252	0.0630919			clcB	b1592	-2.67569	3.84237e-05		clcB	b1592	-2.98162	3.32944e-06		clcB	b1592	-2.78751	2.32525e-05			clcB	b1592
clpA	b0882	-0.682836	0.229417		clpA	b0882	-0.726721	0.232614		clpA	b0882	-0.274537	0.681465			clpA	b0882	-0.415413	0.461341		clpA	b0882	-0.676891	0.259839		clpA	b0882	-0.785255	0.171327			clpA	b0882	-0.531396	0.369712		clpA	b0882	0.18022	0.830074		clpA	b0882	0.0699082	0.926645			clpA	b0882
clpB	b2592	-2.05064	2.36258e-05		clpB	b2592	-1.37627	0.0107069		clpB	b2592	-1.57428	0.00183554			clpB	b2592	-1.58287	0.00103695		clpB	b2592	-0.714948	0.242905		clpB	b2592	-0.933633	0.103393			clpB	b2592	-1.96401	4.83633e-05		clpB	b2592	-1.67729	0.00115463		clpB	b2592	-1.98351	4.04167e-05			clpB	b2592
clpP	b0437	-0.639438	0.0775441		clpP	b0437	-0.554458	0.169213		clpP	b0437	-0.598852	0.0979498			clpP	b0437	0.029036	0.952479		clpP	b0437	-0.559492	0.15295		clpP	b0437	-0.869729	0.016293			clpP	b0437	-0.227535	0.602159		clpP	b0437	-0.722328	0.0517005		clpP	b0437	-0.444518	0.241847			clpP	b0437
clpS	b0881	-1.03349	0.152388		clpS	b0881	-0.758763	0.363608		clpS	b0881	-0.454187	0.58387			clpS	b0881	-0.70291	0.320703		clpS	b0881	0.0978845	0.932472		clpS	b0881	-1.25479	0.0865591			clpS	b0881	-0.636945	0.416514		clpS	b0881	0.601101	0.499142		clpS	b0881	0.294465	0.740008			clpS	b0881
clpX	b0438	-0.115164	0.828989		clpX	b0438	0.0349563	0.958936		clpX	b0438	-0.471763	0.257625			clpX	b0438	-0.261838	0.535438		clpX	b0438	-0.540541	0.208663		clpX	b0438	-0.798856	0.0417789			clpX	b0438	-0.198548	0.682327		clpX	b0438	-1.16994	0.00135101		clpX	b0438	-1.28102	0.000211747			clpX	b0438
clsA	b1249	-1.42057	2.56702e-05		clsA	b1249	-0.913801	0.012587		clsA	b1249	-0.482111	0.205856			clsA	b1249	-1.48223	2.99025e-06		clsA	b1249	-0.853766	0.0209124		clsA	b1249	-1.19894	0.00143663			clsA	b1249	-1.50457	1.50379e-06		clsA	b1249	0.250263	0.610054		clsA	b1249	-0.472639	0.219288			clsA	b1249
clsB	b0789	-0.665048	0.180202		clsB	b0789	-0.840225	0.0981581		clsB	b0789	-1.86701	4.4649e-06			clsB	b0789	-0.812786	0.0621421		clsB	b0789	-1.53073	0.000865722		clsB	b0789	-2.13896	2.38852e-06			clsB	b0789	-0.285739	0.606866		clsB	b0789	-0.553755	0.31333		clsB	b0789	-2.24258	4.27818e-08			clsB	b0789
clsC	b1046	0.102099	0.865022		clsC	b1046	0.553745	0.275019		clsC	b1046	-0.518224	0.249599			clsC	b1046	-0.563233	0.179448		clsC	b1046	0.389747	0.461343		clsC	b1046	-0.159886	0.798825			clsC	b1046	-0.492903	0.262669		clsC	b1046	0.698558	0.12406		clsC	b1046	-0.655228	0.142127			clsC	b1046
cmk	b0910	-0.315018	0.541535		cmk	b0910	-1.02257	0.0150938		cmk	b0910	-0.893217	0.0283104			cmk	b0910	0.158536	0.753213		cmk	b0910	0.130714	0.834994		cmk	b0910	0.0456772	0.946387			cmk	b0910	0.0984174	0.864213		cmk	b0910	-0.720618	0.112276		cmk	b0910	-0.170063	0.755151			cmk	b0910
cmoA	b1870	2.1863	0.000202723		cmoA	b1870	0.617513	0.440288		cmoA	b1870	0.725621	0.295751			cmoA	b1870	2.00761	0.000417557		cmoA	b1870	1.21325	0.0671826		cmoA	b1870	1.53826	0.0182353			cmoA	b1870	2.06398	0.000299488		cmoA	b1870	0.569763	0.478836		cmoA	b1870	1.02963	0.112068			cmoA	b1870
cmoB	b1871	1.11223	0.0773377		cmoB	b1871	0.114023	0.910083		cmoB	b1871	0.145213	0.868398			cmoB	b1871	0.40936	0.553185		cmoB	b1871	0.858676	0.224559		cmoB	b1871	0.657304	0.377184			cmoB	b1871	0.777785	0.234869		cmoB	b1871	0.106714	0.91722		cmoB	b1871	-0.29772	0.714642			cmoB	b1871
cmtA	b2933	0.645344	0.742152		cmtA	b2933	2.08725	0.239396		cmtA	b2933	-0.395806	NA			cmtA	b2933	-0.0780893	0.972045		cmtA	b2933	1.7552	0.315759		cmtA	b2933	1.56473	NA			cmtA	b2933	-0.0490127	0.982587		cmtA	b2933	1.05448	0.611756		cmtA	b2933	-0.696161	0.696619			cmtA	b2933
cmtB	b2934	1.81267	NA		cmtB	b2934	2.22206	NA		cmtB	b2934	2.04648	NA			cmtB	b2934	-0.339646	NA		cmtB	b2934	-1.06546	NA		cmtB	b2934	1.95927	NA			cmtB	b2934	1.03179	NA		cmtB	b2934	0.543584	NA		cmtB	b2934	0.441837	NA			cmtB	b2934
cnu	b1625	2.15918	0.00851285		cnu	b1625	0.912081	0.290461		cnu	b1625	0.658192	0.412149			cnu	b1625	1.14399	0.19233		cnu	b1625	1.03029	0.202694		cnu	b1625	0.668751	0.456522			cnu	b1625	0.904083	0.328206		cnu	b1625	0.815086	0.343477		cnu	b1625	-0.206934	0.834961			cnu	b1625
coaA	b3974	0.799516	0.22435		coaA	b3974	0.17902	0.846371		coaA	b3974	0.697784	0.252321			coaA	b3974	0.254698	0.716766		coaA	b3974	0.675601	0.310889		coaA	b3974	0.628534	0.398692			coaA	b3974	0.540866	0.39568		coaA	b3974	0.768209	0.235292		coaA	b3974	1.09086	0.0522625			coaA	b3974
coaD	b3634	-0.830835	0.10929		coaD	b3634	-0.41318	0.463451		coaD	b3634	-0.497166	0.244148			coaD	b3634	-1.09042	0.0111466		coaD	b3634	0.501351	0.29082		coaD	b3634	0.236541	0.675628			coaD	b3634	-0.426128	0.349239		coaD	b3634	-0.540494	0.265091		coaD	b3634	-1.14923	0.00411457			coaD	b3634
coaE	b0103	-0.0533703	0.940278		coaE	b0103	0.266457	0.681539		coaE	b0103	0.0619772	0.916845			coaE	b0103	0.143379	0.800032		coaE	b0103	1.24841	0.00278708		coaE	b0103	-0.133233	0.844507			coaE	b0103	0.463076	0.320447		coaE	b0103	1.21528	0.00211889		coaE	b0103	-0.0140121	0.979901			coaE	b0103
cobB	b1120	-0.299563	0.52927		cobB	b1120	-0.298371	0.581365		cobB	b1120	-0.641865	0.110719			cobB	b1120	-0.174246	0.70254		cobB	b1120	-0.537935	0.244981		cobB	b1120	-0.803209	0.083689			cobB	b1120	-0.279547	0.543211		cobB	b1120	-0.130698	0.834472		cobB	b1120	-0.833068	0.0352637			cobB	b1120
cobC	b0638	1.80884	0.00396345		cobC	b0638	1.34277	0.0706239		cobC	b0638	0.303657	0.719107			cobC	b0638	1.84991	0.00134677		cobC	b0638	0.893465	0.261988		cobC	b0638	1.34767	0.063993			cobC	b0638	1.37164	0.024136		cobC	b0638	1.014	0.175626		cobC	b0638	0.375978	0.657211			cobC	b0638
cobS	b1992	0.439221	0.73183		cobS	b1992	-0.142607	0.928905		cobS	b1992	0.746952	0.503873			cobS	b1992	0.0150941	0.9926		cobS	b1992	0.852227	0.468491		cobS	b1992	0.497628	0.728163			cobS	b1992	0.37058	0.758203		cobS	b1992	1.43957	0.159695		cobS	b1992	0.943483	0.384023			cobS	b1992
cobT	b1991	1.07459	0.0638889		cobT	b1991	0.140073	0.887775		cobT	b1991	0.483593	0.455301			cobT	b1991	0.914763	0.0854928		cobT	b1991	0.611634	0.380224		cobT	b1991	0.53871	0.502282			cobT	b1991	1.00449	0.054209		cobT	b1991	1.44781	0.00717051		cobT	b1991	0.947047	0.102999			cobT	b1991
cobU	b1993	1.07337	0.18169		cobU	b1993	-0.32097	0.762038		cobU	b1993	-0.00714584	0.99558			cobU	b1993	0.881664	0.230068		cobU	b1993	-0.0699494	0.957364		cobU	b1993	0.25583	0.8325			cobU	b1993	1.00341	0.167452		cobU	b1993	0.163491	0.884378		cobU	b1993	-0.011499	0.992589			cobU	b1993
codA	b0337	0.698082	0.411067		codA	b0337	0.339118	0.738841		codA	b0337	-0.41025	0.653208			codA	b0337	2.41703	0.000151374		codA	b0337	-1.17407	0.142066		codA	b0337	-0.138378	0.902011			codA	b0337	0.464343	0.605646		codA	b0337	-0.50284	0.615488		codA	b0337	0.662945	0.427372			codA	b0337
codB	b0336	0.484775	0.715364		codB	b0336	-0.157424	0.917277		codB	b0336	-0.311488	0.814301			codB	b0336	2.28061	0.00973044		codB	b0336	-2.31056	0.0164822		codB	b0336	0.0558785	0.975733			codB	b0336	0.0447738	0.977865		codB	b0336	-0.904215	0.447143		codB	b0336	2.22766	0.0146873			codB	b0336
cof	b0446	0.0856918	0.900345		cof	b0446	-0.451669	0.427458		cof	b0446	-1.35871	0.000785741			cof	b0446	-0.536473	0.261723		cof	b0446	-0.266528	0.655852		cof	b0446	-1.42324	0.00423081			cof	b0446	-0.344454	0.512906		cof	b0446	-1.26409	0.00334723		cof	b0446	-1.46975	0.000399988			cof	b0446
cohE	b1145	-0.844509	0.327536		cohE	b1145	-0.871657	0.329761		cohE	b1145	-0.00578175	0.99558			cohE	b1145	-1.53489	0.0313259		cohE	b1145	-0.129426	0.912217		cohE	b1145	-1.48319	0.113511			cohE	b1145	-0.52847	0.531975		cohE	b1145	-0.617123	0.506023		cohE	b1145	0.0645292	0.952879			cohE	b1145
copA	b0484	-0.217357	0.731789		copA	b0484	-0.608324	0.28952		copA	b0484	-0.584227	0.268069			copA	b0484	0.839592	0.0667893		copA	b0484	-0.194271	0.781493		copA	b0484	-0.155916	0.820427			copA	b0484	-0.0526238	0.943162		copA	b0484	0.421863	0.503836		copA	b0484	-0.307239	0.60308			copA	b0484
corA	b3816	0.336586	0.594524		corA	b3816	0.0963265	0.907234		corA	b3816	0.374546	0.534389			corA	b3816	0.467076	0.383104		corA	b3816	1.25701	0.0135454		corA	b3816	1.55593	0.00140324			corA	b3816	0.606454	0.269735		corA	b3816	0.23305	0.764263		corA	b3816	0.386605	0.520796			corA	b3816
cpdA	b3032	0.42241	0.241496		cpdA	b3032	0.142124	0.759385		cpdA	b3032	0.485893	0.152912			cpdA	b3032	0.735673	0.0132653		cpdA	b3032	-0.194842	0.65974		cpdA	b3032	0.510339	0.176759			cpdA	b3032	0.569661	0.0747399		cpdA	b3032	-0.0112465	0.983459		cpdA	b3032	0.523784	0.122539			cpdA	b3032
cpdB	b4213	-0.586509	0.23737		cpdB	b4213	-0.261785	0.677449		cpdB	b4213	-0.0512079	0.939573			cpdB	b4213	-0.729929	0.0780381		cpdB	b4213	-0.580949	0.250878		cpdB	b4213	-0.535418	0.358501			cpdB	b4213	-0.196681	0.706945		cpdB	b4213	-0.284098	0.629146		cpdB	b4213	0.29848	0.561277			cpdB	b4213
cpsB	b2049	1.25983	0.264665		cpsB	b2049	1.05402	0.388652		cpsB	b2049	1.57956	0.132169			cpsB	b2049	0.100373	0.944889		cpsB	b2049	2.56318	0.00699124		cpsB	b2049	1.50254	0.232765			cpsB	b2049	1.44172	0.143858		cpsB	b2049	1.52855	0.147376		cpsB	b2049	1.67264	0.113853			cpsB	b2049
cpsG	b2048	2.13485	0.0091248		cpsG	b2048	2.15662	0.0120718		cpsG	b2048	0.745308	0.429676			cpsG	b2048	0.629103	0.527423		cpsG	b2048	2.3285	0.00572984		cpsG	b2048	1.63706	0.0764797			cpsG	b2048	1.06309	0.231356		cpsG	b2048	1.38654	0.135982		cpsG	b2048	-0.524346	0.652082			cpsG	b2048
cptA	b2896	-0.297806	0.719629		cptA	b2896	0.579802	0.435786		cptA	b2896	0.766971	0.234126			cptA	b2896	-0.595644	0.353907		cptA	b2896	0.328169	0.685035		cptA	b2896	0.305072	0.734289			cptA	b2896	-0.956944	0.112613		cptA	b2896	0.155175	0.866494		cptA	b2896	0.852894	0.182065			cptA	b2896
cpxA	b3911	0.466164	0.226477		cpxA	b3911	-0.115131	0.829501		cpxA	b3911	-0.0893108	0.858134			cpxA	b3911	0.796623	0.0137923		cpxA	b3911	-0.643243	0.0943631		cpxA	b3911	-0.18328	0.705446			cpxA	b3911	0.401187	0.297761		cpxA	b3911	-0.409588	0.339951		cpxA	b3911	-0.353542	0.377908			cpxA	b3911
cpxP	b4484	0.411016	0.623456		cpxP	b4484	-1.28351	0.0700626		cpxP	b4484	-1.00679	0.144347			cpxP	b4484	0.771044	0.259358		cpxP	b4484	0.114134	0.915241		cpxP	b4484	0.0342571	0.976893			cpxP	b4484	-0.286689	0.747933		cpxP	b4484	-1.47786	0.0291834		cpxP	b4484	-1.20749	0.0682205			cpxP	b4484
cpxR	b3912	-1.08636	0.0036297		cpxR	b3912	-0.572587	0.201598		cpxR	b3912	-0.189785	0.701655			cpxR	b3912	-1.30868	0.000151374		cpxR	b3912	-0.466763	0.302545		cpxR	b3912	0.223839	0.670997			cpxR	b3912	-0.981211	0.00591361		cpxR	b3912	-0.202038	0.721875		cpxR	b3912	0.134037	0.794221			cpxR	b3912
cra	b0080	-0.0838728	0.892134		cra	b0080	-0.167126	0.785216		cra	b0080	0.317796	0.518372			cra	b0080	-0.48288	0.262785		cra	b0080	-0.103833	0.875563		cra	b0080	-0.106592	0.869479			cra	b0080	-0.300373	0.544917		cra	b0080	-0.0325844	0.964983		cra	b0080	0.261794	0.612874			cra	b0080
creA	b4397	-1.14113	0.045881		creA	b4397	-0.412246	0.585874		creA	b4397	0.350532	0.537947			creA	b4397	-2.0195	7.82537e-05		creA	b4397	0.744087	0.176515		creA	b4397	0.347254	0.639037			creA	b4397	-0.835048	0.0675134		creA	b4397	0.414941	0.512306		creA	b4397	0.384982	0.513586			creA	b4397
creB	b4398	-0.599512	0.526735		creB	b4398	-0.406697	0.711466		creB	b4398	-0.990322	0.203105			creB	b4398	0.326077	0.685665		creB	b4398	0.641605	0.465799		creB	b4398	0.210679	0.858792			creB	b4398	0.631967	0.400512		creB	b4398	0.336776	0.74996		creB	b4398	0.0740124	0.944441			creB	b4398
creC	b4399	0.156026	0.83667		creC	b4399	0.34191	0.651481		creC	b4399	-0.368201	0.52084			creC	b4399	0.095296	0.882306		creC	b4399	1.07844	0.0407453		creC	b4399	0.216076	0.774269			creC	b4399	0.0125394	0.989248		creC	b4399	0.788629	0.150442		creC	b4399	-0.288201	0.649799			creC	b4399
creD	b4400	0.137085	0.884804		creD	b4400	-0.660465	0.428398		creD	b4400	-0.237222	0.746054			creD	b4400	-1.89819	0.00708829		creD	b4400	0.186425	0.836608		creD	b4400	0.0486275	0.964555			creD	b4400	-0.512777	0.456925		creD	b4400	0.0748147	0.939494		creD	b4400	-0.615562	0.342177			creD	b4400
crfC	b4109	0.339451	0.697546		crfC	b4109	0.352425	0.7184		crfC	b4109	0.243206	0.795074			crfC	b4109	-0.29142	0.710935		crfC	b4109	0.131955	0.905079		crfC	b4109	0.564695	0.553329			crfC	b4109	0.223355	0.7891		crfC	b4109	0.301597	0.767272		crfC	b4109	0.324562	0.721911			crfC	b4109
crl	b0240	1.01386	0.141592		crl	b0240	0.79795	0.317542		crl	b0240	1.65663	0.0106915			crl	b0240	2.96172	1.53181e-07		crl	b0240	0.107556	0.921105		crl	b0240	1.74188	0.0107053			crl	b0240	2.2045	0.000202533		crl	b0240	0.751439	0.352773		crl	b0240	3.30253	1.94339e-08			crl	b0240
croE	b1146	0.647272	0.606742		croE	b1146	1.91454	0.104474		croE	b1146	0.975076	0.366229			croE	b1146	-0.87396	0.467398		croE	b1146	1.3009	0.301964		croE	b1146	0.708331	0.639037			croE	b1146	0.433706	0.713118		croE	b1146	1.99207	0.06712		croE	b1146	-0.113471	0.942807			croE	b1146
crp	b3357	-0.128423	0.860696		crp	b3357	-0.0675108	0.93513		crp	b3357	0.690291	0.212655			crp	b3357	0.0539198	0.941444		crp	b3357	-1.15518	0.0298072		crp	b3357	-0.246737	0.726552			crp	b3357	-0.148578	0.832531		crp	b3357	-0.026296	0.975411		crp	b3357	0.729813	0.179248			crp	b3357
crr	b2417	-1.04756	0.0173381		crr	b2417	-0.577682	0.290191		crr	b2417	-1.00206	0.0247478			crr	b2417	-1.14715	0.00588077		crr	b2417	-0.449333	0.421002		crr	b2417	-1.69271	8.35554e-05			crr	b2417	-1.00993	0.0214954		crr	b2417	-1.30567	0.00332485		crr	b2417	-1.56403	0.000156707			crr	b2417
csdA	b2810	0.843078	0.0559736		csdA	b2810	0.436155	0.40541		csdA	b2810	-0.0570646	0.93			csdA	b2810	1.29316	0.000687929		csdA	b2810	-0.252069	0.660719		csdA	b2810	0.193749	0.739785			csdA	b2810	0.787575	0.0608175		csdA	b2810	-0.13419	0.842235		csdA	b2810	-0.110547	0.850642			csdA	b2810
csdE	b2811	1.06476	0.0545065		csdE	b2811	-0.229713	0.776431		csdE	b2811	-0.551629	0.364194			csdE	b2811	1.02678	0.0463733		csdE	b2811	-0.0387345	0.969791		csdE	b2811	-0.486023	0.490015			csdE	b2811	0.897272	0.097996		csdE	b2811	-0.628338	0.346196		csdE	b2811	-1.29412	0.0176064			csdE	b2811
csgA	b1042	-0.236629	0.854907		csgA	b1042	0.00313425	0.998365		csgA	b1042	-0.681385	0.501165			csgA	b1042	-2.98051	0.00669291		csgA	b1042	2.5281	0.00380543		csgA	b1042	-1.72976	0.243839			csgA	b1042	-1.27628	0.143863		csgA	b1042	0.830042	0.47656		csgA	b1042	-1.09258	0.283038			csgA	b1042
csgB	b1041	-0.912242	0.63589		csgB	b1041	-4.30268	0.0629971		csgB	b1041	-1.33967	0.347794			csgB	b1041	-3.29979	0.0914469		csgB	b1041	2.12526	0.090428		csgB	b1041	-1.2194	0.571086			csgB	b1041	-2.2585	0.113534		csgB	b1041	-0.0324107	0.986085		csgB	b1041	-0.913666	0.569064			csgB	b1041
csgC	b1043	0.265121	0.934068		csgC	b1043	0.906511	NA		csgC	b1043	-2.39659	NA			csgC	b1043	0.305001	0.914925		csgC	b1043	1.62655	NA		csgC	b1043	-3.04678	NA			csgC	b1043	0.89661	0.691619		csgC	b1043	0.00685036	NA		csgC	b1043	-1.12034	NA			csgC	b1043
csgD	b1040	2.09298	0.000158263		csgD	b1040	0.95513	0.1669		csgD	b1040	0.475419	0.493374			csgD	b1040	0.286647	0.70967		csgD	b1040	1.45868	0.0146671		csgD	b1040	-2.48185	0.0490875			csgD	b1040	-0.0490717	0.959444		csgD	b1040	1.3776	0.0174306		csgD	b1040	0.79395	0.215119			csgD	b1040
csgE	b1039	3.36686	0.000730561		csgE	b1039	2.49389	0.0325193		csgE	b1039	1.63646	0.119072			csgE	b1039	1.85187	0.0914469		csgE	b1039	2.10127	0.0790984		csgE	b1039	-1.05648	0.690646			csgE	b1039	1.98777	0.0590796		csgE	b1039	2.3986	0.0299511		csgE	b1039	0.706275	0.611755			csgE	b1039
csgF	b1038	4.12933	0.00222768		csgF	b1038	1.25804	0.442654		csgF	b1038	-0.842197	0.604856			csgF	b1038	2.06647	0.176555		csgF	b1038	1.08456	0.498356		csgF	b1038	-3.07588	0.205628			csgF	b1038	0.474528	0.826709		csgF	b1038	1.00568	0.547335		csgF	b1038	-0.0573185	0.975234			csgF	b1038
csgG	b1037	0.671469	0.438536		csgG	b1037	-0.302309	0.774942		csgG	b1037	-1.08019	0.127787			csgG	b1037	-0.346846	0.695142		csgG	b1037	0.39217	0.685331		csgG	b1037	-1.45382	0.0824849			csgG	b1037	-0.907482	0.248719		csgG	b1037	-0.424744	0.674086		csgG	b1037	-1.27561	0.0737314			csgG	b1037
csiD	b2659	0.0896548	0.950343		csiD	b2659	-1.51632	0.210828		csiD	b2659	-0.931	0.445319			csiD	b2659	-0.926944	0.405577		csiD	b2659	-0.394759	0.797075		csiD	b2659	-0.0309975	0.988106			csiD	b2659	0.769689	0.54266		csiD	b2659	2.19812	0.0445094		csiD	b2659	1.27186	0.259758			csiD	b2659
csiE	b2535	-2.91169	2.89856e-07		csiE	b2535	-0.0457671	0.968084		csiE	b2535	0.292044	0.726718			csiE	b2535	-3.86819	1.36544e-12		csiE	b2535	-0.956413	0.18414		csiE	b2535	0.368707	0.660773			csiE	b2535	-3.28822	1.97958e-09		csiE	b2535	-1.14275	0.0981849		csiE	b2535	0.756154	0.271957			csiE	b2535
csiR	b2664	-2.19484	2.26231e-05		csiR	b2664	0.0767249	0.932999		csiR	b2664	-0.130365	0.87148			csiR	b2664	-2.52909	3.45337e-07		csiR	b2664	-0.403813	0.58171		csiR	b2664	-0.79297	0.213989			csiR	b2664	-1.66594	0.00133466		csiR	b2664	0.274696	0.750627		csiR	b2664	-0.546367	0.394352			csiR	b2664
cspA	b3556	0.645042	0.51452		cspA	b3556	0.899208	0.341308		cspA	b3556	2.19664	0.00349957			cspA	b3556	1.18243	0.132531		cspA	b3556	1.24012	0.149207		cspA	b3556	2.43663	0.00163561			cspA	b3556	1.00181	0.241556		cspA	b3556	-0.584325	0.587101		cspA	b3556	2.08868	0.0055527			cspA	b3556
cspB	b1557	0.438243	0.7107		cspB	b1557	1.9217	0.025749		cspB	b1557	2.14092	0.00753431			cspB	b1557	-0.196752	0.863113		cspB	b1557	2.46518	0.00283183		cspB	b1557	0.616533	0.564294			cspB	b1557	-1.32343	0.158679		cspB	b1557	0.0921218	0.950189		cspB	b1557	1.20987	0.171271			cspB	b1557
cspC	b1823	2.32238	9.70926e-05		cspC	b1823	1.70147	0.0102564		cspC	b1823	0.796387	0.275278			cspC	b1823	2.97824	1.73947e-07		cspC	b1823	1.2396	0.0797854		cspC	b1823	-0.175975	0.855823			cspC	b1823	2.38292	5.98407e-05		cspC	b1823	0.0508281	0.965569		cspC	b1823	-0.0566285	0.95587			cspC	b1823
cspD	b0880	-3.41489	7.73658e-06		cspD	b0880	-2.01137	0.0205048		cspD	b0880	-0.653525	0.518777			cspD	b0880	-4.55279	4.76876e-10		cspD	b0880	-1.17072	0.225906		cspD	b0880	-0.982783	0.314601			cspD	b0880	-3.83788	2.16961e-07		cspD	b0880	-2.27192	0.00695644		cspD	b0880	0.0575987	0.965719			cspD	b0880
cspE	b0623	-0.983996	0.126191		cspE	b0623	-1.75559	0.00380264		cspE	b0623	-1.59987	0.00678478			cspE	b0623	-0.125745	0.873796		cspE	b0623	-0.576476	0.447821		cspE	b0623	-1.41456	0.0236867			cspE	b0623	-0.435296	0.565317		cspE	b0623	-2.30395	6.34028e-05		cspE	b0623	-0.721925	0.281691			cspE	b0623
cspF	b1558	1.41082	0.195587		cspF	b1558	0.768709	0.465401		cspF	b1558	1.02531	0.201978			cspF	b1558	0.0223033	0.990795		cspF	b1558	2.29438	0.00279781		cspF	b1558	1.49021	0.0761262			cspF	b1558	0.751583	0.48819		cspF	b1558	0.958022	0.311254		cspF	b1558	1.45164	0.0544427			cspF	b1558
cspG	b0990	-0.636755	0.50557		cspG	b0990	0.57041	0.526757		cspG	b0990	1.4181	0.0405299			cspG	b0990	0.432415	0.594476		cspG	b0990	0.889386	0.262368		cspG	b0990	0.882317	0.298073			cspG	b0990	-0.926154	0.232397		cspG	b0990	-0.682459	0.440405		cspG	b0990	1.08241	0.142886			cspG	b0990
cspH	b0989	3.25848	0.313187		cspH	b0989	2.17731	NA		cspH	b0989	0.54108	NA			cspH	b0989	1.05325	0.769937		cspH	b0989	2.17065	NA		cspH	b0989	-1.84233	NA			cspH	b0989	-0.138525	0.977865		cspH	b0989	0.288916	NA		cspH	b0989	0.0614144	NA			cspH	b0989
cspI	b1552	0.461157	0.775997		cspI	b1552	0.814594	0.560707		cspI	b1552	1.56571	0.151047			cspI	b1552	1.42784	0.195942		cspI	b1552	2.62041	0.0125278		cspI	b1552	1.95652	0.0794661			cspI	b1552	-0.237844	0.881175		cspI	b1552	-0.291027	0.863971		cspI	b1552	1.3539	0.226691			cspI	b1552
csrA	b2696	-2.85187	0.000119929		csrA	b2696	-1.85472	0.0262533		csrA	b2696	-1.6413	0.0412552			csrA	b2696	-3.45472	1.17039e-06		csrA	b2696	-1.44309	0.100309		csrA	b2696	-1.40152	0.108266			csrA	b2696	-2.53288	0.000617205		csrA	b2696	-1.80717	0.0300478		csrA	b2696	-1.26885	0.129689			csrA	b2696
csrB	b4408	-3.00057	4.77582e-06		csrB	b4408	-1.78443	0.0161849		csrB	b4408	-1.38986	0.0596206			csrB	b4408	-1.24329	0.0780836		csrB	b4408	0.439068	0.655991		csrB	b4408	-0.645441	0.465488			csrB	b4408	-2.66605	5.43816e-05		csrB	b4408	-1.6185	0.0329562		csrB	b4408	-0.770528	0.345258			csrB	b4408
csrC	b4457	-3.32557	0.000877755		csrC	b4457	-2.00435	0.0869607		csrC	b4457	-2.66823	0.0105619			csrC	b4457	-2.27847	0.02417		csrC	b4457	0.236129	0.889721		csrC	b4457	-3.96843	8.98543e-05			csrC	b4457	-4.34372	6.2285e-06		csrC	b4457	-1.75869	0.14294		csrC	b4457	-3.89211	6.30521e-05			csrC	b4457
csrD	b3252	-0.043445	0.931231		csrD	b3252	0.203924	0.688045		csrD	b3252	-0.193109	0.670156			csrD	b3252	-0.341194	0.36749		csrD	b3252	0.0155756	0.983029		csrD	b3252	-0.318284	0.477456			csrD	b3252	-0.535074	0.149408		csrD	b3252	0.178413	0.743971		csrD	b3252	-0.105947	0.828343			csrD	b3252
cstA	b0598	-1.23852	0.143339		cstA	b0598	-1.09963	0.249132		cstA	b0598	1.23361	0.147111			cstA	b0598	-1.95375	0.00827018		cstA	b0598	-0.931176	0.329476		cstA	b0598	1.74918	0.0365765			cstA	b0598	-0.885772	0.324652		cstA	b0598	-0.924224	0.352898		cstA	b0598	2.6857	0.000278479			cstA	b0598
cueO	b0123	0.345121	0.54268		cueO	b0123	-0.170073	0.804567		cueO	b0123	-0.109351	0.868398			cueO	b0123	-0.123447	0.832148		cueO	b0123	0.401291	0.492049		cueO	b0123	0.530911	0.320949			cueO	b0123	0.538873	0.288414		cueO	b0123	0.821643	0.104486		cueO	b0123	-0.0515149	0.940796			cueO	b0123
cueR	b0487	1.02004	0.0825144		cueR	b0487	0.033708	0.973302		cueR	b0487	-0.193357	0.805988			cueR	b0487	0.986367	0.074901		cueR	b0487	0.0201947	0.985006		cueR	b0487	-0.310503	0.687273			cueR	b0487	0.641333	0.31523		cueR	b0487	-0.0282382	0.976326		cueR	b0487	-0.73219	0.237871			cueR	b0487
curA	b1449	-0.706059	0.286606		curA	b1449	0.786892	0.259329		curA	b1449	0.701718	0.280875			curA	b1449	-0.365244	0.582909		curA	b1449	0.786969	0.243303		curA	b1449	0.635864	0.356941			curA	b1449	0.161385	0.841335		curA	b1449	1.32035	0.0290632		curA	b1449	0.728118	0.251445			curA	b1449
cusA	b0575	0.236843	0.741179		cusA	b0575	-0.361162	0.635781		cusA	b0575	-0.737737	0.136893			cusA	b0575	-0.420767	0.463986		cusA	b0575	0.21187	0.777735		cusA	b0575	-0.450338	0.501762			cusA	b0575	-0.0818273	0.905695		cusA	b0575	0.238401	0.751054		cusA	b0575	-1.33238	0.00717819			cusA	b0575
cusB	b0574	1.90847	0.278016		cusB	b0574	2.16744	0.222795		cusB	b0574	0.925058	0.625337			cusB	b0574	0.766374	0.687102		cusB	b0574	1.67212	0.364502		cusB	b0574	2.04442	0.253015			cusB	b0574	1.10303	0.545705		cusB	b0574	1.57433	0.406371		cusB	b0574	-0.705383	0.760027			cusB	b0574
cusC	b0572	0.599709	0.761996		cusC	b0572	2.98099	0.0196945		cusC	b0572	-0.00926876	0.996481			cusC	b0572	0.360942	0.837395		cusC	b0572	0.134513	0.95665		cusC	b0572	0.869449	0.656379			cusC	b0572	0.547423	0.752297		cusC	b0572	0.124221	0.956737		cusC	b0572	-1.93296	0.310935			cusC	b0572
cusF	b0573	3.89138	NA		cusF	b0573	-2.45222	NA		cusF	b0573	-2.63992	NA			cusF	b0573	1.05311	NA		cusF	b0573	0.296384	NA		cusF	b0573	-0.265264	NA			cusF	b0573	3.10923	NA		cusF	b0573	-0.165526	NA		cusF	b0573	0.486212	NA			cusF	b0573
cusR	b0571	1.2559	0.0266081		cusR	b0571	0.813922	0.22161		cusR	b0571	0.262419	0.716519			cusR	b0571	1.27451	0.0151336		cusR	b0571	1.0437	0.0871643		cusR	b0571	0.145655	0.868507			cusR	b0571	1.01485	0.0689466		cusR	b0571	0.662755	0.333079		cusR	b0571	0.547984	0.386738			cusR	b0571
cusS	b0570	0.581848	0.416622		cusS	b0570	0.27495	0.744132		cusS	b0570	0.272444	0.681883			cusS	b0570	1.70414	0.000420098		cusS	b0570	1.58996	0.00305637		cusS	b0570	0.728754	0.261889			cusS	b0570	1.03789	0.0491458		cusS	b0570	1.17067	0.0332781		cusS	b0570	0.293402	0.667034			cusS	b0570
cutA	b4137	0.0943928	0.916866		cutA	b4137	0.379272	0.593619		cutA	b4137	1.16925	0.0227409			cutA	b4137	0.00687242	0.994848		cutA	b4137	-0.210324	0.788307		cutA	b4137	0.319861	0.699412			cutA	b4137	-0.675826	0.279063		cutA	b4137	0.731561	0.211392		cutA	b4137	1.22528	0.0182562			cutA	b4137
cutC	b1874	-1.90434	0.00294504		cutC	b1874	-2.09599	0.00124634		cutC	b1874	-2.97279	7.74181e-07			cutC	b1874	-1.68785	0.00649223		cutC	b1874	-1.67358	0.0140961		cutC	b1874	-2.98413	1.56221e-06			cutC	b1874	-2.2868	0.000188303		cutC	b1874	-2.80468	5.65917e-06		cutC	b1874	-2.81294	2.5103e-06			cutC	b1874
cvpA	b2313	1.83565	9.61316e-05		cvpA	b2313	1.32569	0.0106668		cvpA	b2313	0.132583	0.855823			cvpA	b2313	2.22482	6.95801e-07		cvpA	b2313	0.670009	0.263458		cvpA	b2313	-0.0649422	0.939743			cvpA	b2313	1.58849	0.000754267		cvpA	b2313	0.301047	0.689202		cvpA	b2313	-0.261446	0.693494			cvpA	b2313
cvrA	b1191	-0.0898755	0.900128		cvrA	b1191	0.24105	0.715736		cvrA	b1191	-0.545153	0.295116			cvrA	b1191	0.252406	0.640619		cvrA	b1191	-0.170806	0.806377		cvrA	b1191	-0.440389	0.488305			cvrA	b1191	0.059703	0.932528		cvrA	b1191	-0.263568	0.694798		cvrA	b1191	-0.141879	0.826945			cvrA	b1191
cyaA	b3806	0.602969	0.112409		cyaA	b3806	0.701818	0.0706945		cyaA	b3806	0.220935	0.62596			cyaA	b3806	1.17741	0.000249587		cyaA	b3806	0.0343096	0.9597		cyaA	b3806	0.142697	0.777506			cyaA	b3806	0.719935	0.0431344		cyaA	b3806	0.220072	0.671152		cyaA	b3806	-0.0603779	0.908894			cyaA	b3806
cyaR	b4438	0.709078	0.812856		cyaR	b4438	-0.295271	0.920047		cyaR	b4438	-1.88027	NA			cyaR	b4438	-0.869015	0.756815		cyaR	b4438	1.7198	0.357821		cyaR	b4438	4.781	NA			cyaR	b4438	-3.5337	0.171127		cyaR	b4438	-1.64389	NA		cyaR	b4438	2.42016	NA			cyaR	b4438
cyaY	b3807	0.663921	0.313187		cyaY	b3807	0.418592	0.587962		cyaY	b3807	0.580828	0.364504			cyaY	b3807	1.0158	0.058157		cyaY	b3807	0.298665	0.709102		cyaY	b3807	0.286353	0.734266			cyaY	b3807	1.11484	0.0390501		cyaY	b3807	0.191415	0.831866		cyaY	b3807	0.822953	0.173337			cyaY	b3807
cybB	b1418	-1.40819	0.0767962		cybB	b1418	-1.1251	0.181312		cybB	b1418	-0.624078	0.408867			cybB	b1418	-0.101853	0.902059		cybB	b1418	-0.152694	0.882449		cybB	b1418	-0.455323	0.675628			cybB	b1418	-0.456239	0.535253		cybB	b1418	1.03083	0.122719		cybB	b1418	0.391466	0.633046			cybB	b1418
cybC	b4236	0.710604	0.222491		cybC	b4236	-0.74972	0.207622		cybC	b4236	-0.581068	0.27754			cybC	b4236	1.23051	0.00765685		cybC	b4236	-0.751741	0.188439		cybC	b4236	-0.904407	0.131761			cybC	b4236	1.18704	0.0111024		cybC	b4236	-0.842435	0.118451		cybC	b4236	-0.739293	0.159671			cybC	b4236
cycA	b4208	-0.0441058	0.942723		cycA	b4208	-1.04816	0.0237473		cycA	b4208	-0.444966	0.38302			cycA	b4208	-0.725276	0.095027		cycA	b4208	-0.491164	0.357821		cycA	b4208	0.0472312	0.949439			cycA	b4208	0.378246	0.47095		cycA	b4208	0.458397	0.416504		cycA	b4208	0.666715	0.152979			cycA	b4208
cydA	b0733	-0.86576	0.229636		cydA	b0733	-1.34919	0.0548073		cydA	b0733	-1.94692	0.00178298			cydA	b0733	-0.981866	0.130458		cydA	b0733	-1.18788	0.097152		cydA	b0733	-1.61703	0.0152345			cydA	b0733	-1.60045	0.0109783		cydA	b0733	-1.76112	0.00732368		cydA	b0733	-2.35607	8.26983e-05			cydA	b0733
cydB	b0734	-0.592036	0.399005		cydB	b0734	-1.36095	0.0315691		cydB	b0734	-1.5653	0.00774792			cydB	b0734	-0.821383	0.178866		cydB	b0734	-1.23934	0.0540762		cydB	b0734	-1.53564	0.0122477			cydB	b0734	-1.53236	0.00797699		cydB	b0734	-1.70227	0.00456959		cydB	b0734	-2.06046	0.000214739			cydB	b0734
cydC	b0886	-0.115482	0.915732		cydC	b0886	-0.334323	0.756264		cydC	b0886	0.2323	0.824939			cydC	b0886	0.0124541	0.992362		cydC	b0886	0.44495	0.659306		cydC	b0886	0.726216	0.432835			cydC	b0886	-0.6163	0.487724		cydC	b0886	-0.811085	0.387011		cydC	b0886	0.0815246	0.942807			cydC	b0886
cydD	b0887	0.982491	0.219399		cydD	b0887	-0.308168	0.763849		cydD	b0887	0.282276	0.769148			cydD	b0887	0.936794	0.196595		cydD	b0887	0.779918	0.353884		cydD	b0887	1.20655	0.123154			cydD	b0887	0.445072	0.617523		cydD	b0887	-0.389154	0.710798		cydD	b0887	0.180848	0.858342			cydD	b0887
cydX	b4515	-1.29556	0.165368		cydX	b4515	-1.02158	0.327164		cydX	b4515	-1.87927	0.0214192			cydX	b4515	-2.09331	0.00960261		cydX	b4515	0.0451195	0.97663		cydX	b4515	-1.44177	0.123604			cydX	b4515	-1.4632	0.0850872		cydX	b4515	-0.762963	0.487308		cydX	b4515	-1.74196	0.0360073			cydX	b4515
cynR	b0338	1.2653	0.158497		cynR	b0338	0.509131	0.680828		cynR	b0338	0.907692	0.378305			cynR	b0338	0.979244	0.242443		cynR	b0338	-0.890079	0.432537		cynR	b0338	0.688694	0.639037			cynR	b0338	0.684268	0.464983		cynR	b0338	-0.86454	0.440181		cynR	b0338	0.533931	0.664856			cynR	b0338
cynS	b0340	-0.111914	0.927362		cynS	b0340	-1.85566	0.128543		cynS	b0340	0.247574	0.81245			cynS	b0340	-1.36683	0.135361		cynS	b0340	-0.710216	0.498713		cynS	b0340	-0.375597	0.783125			cynS	b0340	-0.793469	0.370452		cynS	b0340	-0.41569	0.725096		cynS	b0340	-0.968513	0.313769			cynS	b0340
cynT	b0339	1.24296	0.143877		cynT	b0339	-0.527993	0.647083		cynT	b0339	0.24	0.819042			cynT	b0339	0.780672	0.34385		cynT	b0339	-0.0395695	0.977557		cynT	b0339	0.477873	0.687029			cynT	b0339	0.265677	0.791964		cynT	b0339	-0.537076	0.60726		cynT	b0339	-0.293853	0.7897			cynT	b0339
cynX	b0341	-0.345501	0.814616		cynX	b0341	0.159284	0.920047		cynX	b0341	-0.0154472	0.992538			cynX	b0341	1.32615	0.12346		cynX	b0341	1.08965	0.310952		cynX	b0341	-0.647345	0.659634			cynX	b0341	0.785162	0.436214		cynX	b0341	-0.068497	0.965845		cynX	b0341	0.196901	0.878749			cynX	b0341
cyoA	b0432	2.18371	9.94261e-07		cyoA	b0432	2.02702	1.34895e-05		cyoA	b0432	4.05664	8.9799e-21			cyoA	b0432	2.09747	1.71723e-06		cyoA	b0432	0.0978921	0.904462		cyoA	b0432	1.87388	0.000172681			cyoA	b0432	1.83767	4.98231e-05		cyoA	b0432	1.75099	0.000235093		cyoA	b0432	3.50707	5.31447e-15			cyoA	b0432
cyoB	b0431	0.855118	0.0648319		cyoB	b0431	0.678886	0.201598		cyoB	b0431	3.16144	3.29502e-15			cyoB	b0431	0.474666	0.322998		cyoB	b0431	-0.819064	0.103226		cyoB	b0431	1.85654	2.54863e-05			cyoB	b0431	0.677064	0.159732		cyoB	b0431	0.960401	0.0474322		cyoB	b0431	2.79792	5.87326e-12			cyoB	b0431
cyoC	b0430	0.825043	0.115117		cyoC	b0430	0.905733	0.102743		cyoC	b0430	3.14635	3.63779e-12			cyoC	b0430	0.569178	0.27145		cyoC	b0430	-1.06318	0.0483554		cyoC	b0430	1.05906	0.0709911			cyoC	b0430	0.480712	0.408742		cyoC	b0430	0.350798	0.620824		cyoC	b0430	2.34462	5.37062e-07			cyoC	b0430
cyoD	b0429	-1.32244	0.00324321		cyoD	b0429	-0.784067	0.151572		cyoD	b0429	1.46861	0.00164568			cyoD	b0429	-1.17431	0.00697889		cyoD	b0429	-1.73148	0.000239552		cyoD	b0429	-0.0473355	0.962582			cyoD	b0429	-0.759439	0.115341		cyoD	b0429	-0.015765	0.983897		cyoD	b0429	1.95531	1.14584e-05			cyoD	b0429
cyoE	b0428	-1.12904	0.00686757		cyoE	b0428	-0.799205	0.0972091		cyoE	b0428	0.680508	0.139729			cyoE	b0428	-1.38314	0.000433749		cyoE	b0428	-1.61265	0.000129876		cyoE	b0428	-1.12656	0.0139598			cyoE	b0428	-0.871429	0.0443268		cyoE	b0428	0.117291	0.867381		cyoE	b0428	0.375372	0.465869			cyoE	b0428
cysA	b2422	1.00484	0.120032		cysA	b2422	0.878647	0.226077		cysA	b2422	2.20554	0.000189858			cysA	b2422	0.458618	0.499715		cysA	b2422	-1.36253	0.0412279		cysA	b2422	1.60788	0.015401			cysA	b2422	0.948111	0.140554		cysA	b2422	0.809604	0.276831		cysA	b2422	3.06564	5.30948e-08			cysA	b2422
cysB	b1275	-1.58722	0.00623733		cysB	b1275	0.463848	0.514803		cysB	b1275	1.49568	0.00650459			cysB	b1275	-0.98293	0.0691643		cysB	b1275	-1.26155	0.0339005		cysB	b1275	1.05642	0.118783			cysB	b1275	-1.3736	0.0083496		cysB	b1275	0.266007	0.748564		cysB	b1275	2.62355	2.18712e-07			cysB	b1275
cysC	b2750	0.482007	0.51991		cysC	b2750	2.85174	6.00567e-07		cysC	b2750	2.37674	5.90484e-05			cysC	b2750	0.756941	0.220277		cysC	b2750	-0.0214944	0.987006		cysC	b2750	0.612202	0.5			cysC	b2750	1.6126	0.0039042		cysC	b2750	1.97682	0.00102514		cysC	b2750	2.85751	6.74204e-07			cysC	b2750
cysD	b2752	-1.20672	0.150218		cysD	b2752	0.456914	0.684282		cysD	b2752	2.76101	0.000224764			cysD	b2752	-0.841191	0.306125		cysD	b2752	-0.974105	0.3001		cysD	b2752	2.46172	0.00193163			cysD	b2752	-0.51835	0.596782		cysD	b2752	1.51062	0.0776424		cysD	b2752	4.39479	4.90556e-10			cysD	b2752
cysE	b3607	0.613217	0.124306		cysE	b3607	0.424911	0.347549		cysE	b3607	0.604768	0.109087			cysE	b3607	0.79204	0.0227232		cysE	b3607	-0.192424	0.71379		cysE	b3607	0.205945	0.690932			cysE	b3607	0.535484	0.162534		cysE	b3607	0.355922	0.447143		cysE	b3607	0.431325	0.287823			cysE	b3607
cysG	b3368	1.3553	4.19518e-06		cysG	b3368	0.258469	0.551348		cysG	b3368	0.862265	0.00399612			cysG	b3368	1.35482	1.08989e-06		cysG	b3368	0.624484	0.0669439		cysG	b3368	0.397408	0.33986			cysG	b3368	1.05666	0.000201472		cysG	b3368	0.517925	0.133821		cysG	b3368	0.565703	0.0883702			cysG	b3368
cysH	b2762	0.511355	0.50808		cysH	b2762	0.588261	0.471086		cysH	b2762	2.72074	8.0229e-06			cysH	b2762	0.467797	0.503694		cysH	b2762	-2.5875	9.32489e-05		cysH	b2762	1.71654	0.0177729			cysH	b2762	1.1828	0.0595411		cysH	b2762	0.501611	0.560918		cysH	b2762	3.57235	1.2801e-09			cysH	b2762
cysI	b2763	1.07018	0.106239		cysI	b2763	1.38075	0.0404897		cysI	b2763	3.24942	3.78792e-08			cysI	b2763	0.869534	0.175518		cysI	b2763	-1.07172	0.139816		cysI	b2763	2.43051	0.000139803			cysI	b2763	1.56004	0.0104546		cysI	b2763	1.18504	0.0910008		cysI	b2763	3.91361	1.12205e-11			cysI	b2763
cysJ	b2764	0.243813	0.803179		cysJ	b2764	1.77697	0.0115484		cysJ	b2764	3.38276	1.63432e-07			cysJ	b2764	0.208572	0.808516		cysJ	b2764	-0.72612	0.402388		cysJ	b2764	2.75359	5.68694e-05			cysJ	b2764	0.720672	0.360123		cysJ	b2764	1.62414	0.0223033		cysJ	b2764	4.72792	2.42902e-14			cysJ	b2764
cysK	b2414	-0.575318	0.38825		cysK	b2414	0.783926	0.253318		cysK	b2414	2.60908	6.703e-07			cysK	b2414	0.108583	0.885504		cysK	b2414	-1.04086	0.100575		cysK	b2414	1.01631	0.108731			cysK	b2414	-0.114991	0.891799		cysK	b2414	1.25756	0.0381479		cysK	b2414	3.29108	1.05254e-10			cysK	b2414
cysM	b2421	1.77579	5.26839e-07		cysM	b2421	0.965666	0.0237473		cysM	b2421	1.81699	1.04723e-06			cysM	b2421	1.6469	1.58371e-06		cysM	b2421	0.240702	0.677603		cysM	b2421	0.440836	0.459584			cysM	b2421	2.04889	1.1004e-09		cysM	b2421	0.999984	0.0135696		cysM	b2421	1.88169	4.7261e-07			cysM	b2421
cysN	b2751	-0.685326	0.38825		cysN	b2751	0.332076	0.736385		cysN	b2751	1.53655	0.0251083			cysN	b2751	0.0395606	0.970285		cysN	b2751	-1.12386	0.146339		cysN	b2751	1.60964	0.0242927			cysN	b2751	0.429962	0.618444		cysN	b2751	0.956059	0.243416		cysN	b2751	2.85776	4.45876e-06			cysN	b2751
cysP	b2425	-0.53158	0.577396		cysP	b2425	1.23602	0.169213		cysP	b2425	2.89051	0.000120726			cysP	b2425	-1.06355	0.1719		cysP	b2425	-0.189492	0.882179		cysP	b2425	2.47169	0.00231857			cysP	b2425	-0.447864	0.648679		cysP	b2425	2.313	0.00228962		cysP	b2425	4.49467	2.31065e-10			cysP	b2425
cysQ	b4214	-0.349273	0.622759		cysQ	b4214	-0.721001	0.297863		cysQ	b4214	-1.11082	0.0523083			cysQ	b4214	-0.581736	0.330381		cysQ	b4214	-0.785218	0.232027		cysQ	b4214	-1.39004	0.0182353			cysQ	b4214	0.00780562	0.993922		cysQ	b4214	-1.12538	0.0669165		cysQ	b4214	-1.42888	0.0093992			cysQ	b4214
cysS	b0526	0.853525	0.0725762		cysS	b0526	0.251178	0.699355		cysS	b0526	0.087598	0.899033			cysS	b0526	1.12178	0.00799374		cysS	b0526	0.973842	0.0413138		cysS	b0526	0.261424	0.675628			cysS	b0526	0.872506	0.0550669		cysS	b0526	0.430513	0.466556		cysS	b0526	-0.169711	0.781583			cysS	b0526
cysT	b1910	4.85839	2.49978e-14		cysT	b1910	3.79638	7.31619e-09		cysT	b1910	1.73719	0.0137671			cysT	b1910	5.81753	8.5202e-21		cysT	b1910	3.86211	4.51527e-09		cysT	b1910	2.33511	0.000838364			cysT	b1910	4.8038	2.12104e-14		cysT	b1910	1.55645	0.0443455		cysT	b1910	1.74159	0.0126029			cysT	b1910
cysU	b2424	-0.0906576	0.915676		cysU	b2424	0.658585	0.375576		cysU	b2424	2.53758	1.74117e-05			cysU	b2424	-0.628561	0.302194		cysU	b2424	-0.293846	0.739985		cysU	b2424	1.82016	0.00997376			cysU	b2424	0.137882	0.863637		cysU	b2424	1.47346	0.0128303		cysU	b2424	3.98411	1.65204e-12			cysU	b2424
cysW	b2423	0.0339951	0.959932		cysW	b2423	0.900866	0.104957		cysW	b2423	2.26592	2.37733e-06			cysW	b2423	-0.106837	0.866496		cysW	b2423	-1.41126	0.00890647		cysW	b2423	1.43653	0.0130567			cysW	b2423	0.366396	0.538347		cysW	b2423	1.05831	0.0435946		cysW	b2423	2.98658	1.30868e-10			cysW	b2423
cysZ	b2413	-0.54541	0.683153		cysZ	b2413	-0.865143	0.494676		cysZ	b2413	-0.926081	0.405619			cysZ	b2413	-1.38886	0.179522		cysZ	b2413	1.47349	0.169775		cysZ	b2413	0.926696	0.422773			cysZ	b2413	-1.26705	0.235846		cysZ	b2413	-0.607637	0.660135		cysZ	b2413	-0.833597	0.46256			cysZ	b2413
cytR	b3934	0.0435121	0.953513		cytR	b3934	-7.70456e-05	0.99986		cytR	b3934	1.09261	0.0487679			cytR	b3934	-0.528143	0.3552		cytR	b3934	-0.462309	0.518062		cytR	b3934	0.285986	0.735485			cytR	b3934	-0.625276	0.284663		cytR	b3934	-1.77183	0.00132508		cytR	b3934	1.10157	0.0492834			cytR	b3934
dacA	b0632	1.77551	0.0300532		dacA	b0632	1.21724	0.203701		dacA	b0632	1.10089	0.223587			dacA	b0632	2.60621	0.000441855		dacA	b0632	1.76355	0.0412279		dacA	b0632	1.86098	0.0298032			dacA	b0632	1.95169	0.0140997		dacA	b0632	0.265441	0.843601		dacA	b0632	0.841425	0.372809			dacA	b0632
dacB	b3182	1.08834	0.0266166		dacB	b3182	0.959109	0.0699745		dacB	b3182	-0.0382917	0.96019			dacB	b3182	0.862113	0.0663725		dacB	b3182	0.350949	0.591845		dacB	b3182	0.528625	0.398662			dacB	b3182	0.785155	0.105869		dacB	b3182	-0.207247	0.786728		dacB	b3182	0.178936	0.788182			dacB	b3182
dacC	b0839	-1.06556	0.0260726		dacC	b0839	-1.1121	0.0360588		dacC	b0839	-0.804801	0.120837			dacC	b0839	-1.38865	0.00159096		dacC	b0839	-0.305812	0.647303		dacC	b0839	-0.417346	0.514582			dacC	b0839	-0.594721	0.260111		dacC	b0839	0.651498	0.263813		dacC	b0839	0.0728567	0.919413			dacC	b0839
dacD	b2010	-0.720826	0.351254		dacD	b2010	-0.0418533	0.968084		dacD	b2010	-0.566898	0.366498			dacD	b2010	0.283602	0.679511		dacD	b2010	0.87082	0.160413		dacD	b2010	0.0922183	0.921478			dacD	b2010	-0.333127	0.641842		dacD	b2010	0.406071	0.592533		dacD	b2010	-0.326373	0.647326			dacD	b2010
dadA	b1189	0.436972	0.746362		dadA	b1189	0.704994	0.607434		dadA	b1189	4.22856	4.4649e-06			dadA	b1189	-0.0577513	0.970285		dadA	b1189	-1.74357	0.117942		dadA	b1189	3.56025	0.000236452			dadA	b1189	0.623082	0.621691		dadA	b1189	-1.70104	0.131664		dadA	b1189	4.26839	2.61476e-06			dadA	b1189
dadX	b1190	-0.346893	0.812355		dadX	b1190	-0.00166952	0.999332		dadX	b1190	2.4342	0.0173458			dadX	b1190	-1.08617	0.317986		dadX	b1190	-1.9216	0.0932671		dadX	b1190	1.73048	0.129545			dadX	b1190	-0.239122	0.86988		dadX	b1190	-1.86854	0.103417		dadX	b1190	2.67237	0.007569			dadX	b1190
dam	b3387	0.686731	0.237197		dam	b3387	0.752397	0.20345		dam	b3387	0.746868	0.159825			dam	b3387	0.0399616	0.957228		dam	b3387	0.714092	0.219662		dam	b3387	0.532848	0.414034			dam	b3387	0.582147	0.293921		dam	b3387	0.460581	0.482416		dam	b3387	0.634701	0.253518			dam	b3387
damX	b3388	0.812562	0.0153242		damX	b3388	0.195405	0.690376		damX	b3388	0.0712862	0.890163			damX	b3388	0.609175	0.0667848		damX	b3388	-0.165264	0.743577		damX	b3388	-0.0192237	0.975733			damX	b3388	0.610461	0.0793951		damX	b3388	-0.465094	0.26065		damX	b3388	-0.448198	0.233702			damX	b3388
dapA	b2478	0.519654	0.260628		dapA	b2478	-0.0256145	0.973302		dapA	b2478	0.245064	0.640637			dapA	b2478	0.281436	0.544678		dapA	b2478	-0.33495	0.525198		dapA	b2478	-0.404372	0.428294			dapA	b2478	0.0482921	0.94037		dapA	b2478	-0.144733	0.829074		dapA	b2478	0.225005	0.670268			dapA	b2478
dapB	b0031	0.57748	0.375367		dapB	b0031	0.0364464	0.972898		dapB	b0031	-4.64762	1.07463e-22			dapB	b0031	0.841416	0.127007		dapB	b0031	0.674779	0.316996		dapB	b0031	-3.24847	4.65381e-10			dapB	b0031	1.11966	0.0413978		dapB	b0031	0.550991	0.450355		dapB	b0031	-3.68503	3.36865e-14			dapB	b0031
dapD	b0166	0.647304	0.196223		dapD	b0166	-1.18304	0.0121427		dapD	b0166	-1.57143	0.000224764			dapD	b0166	0.756978	0.0894363		dapD	b0166	-1.13473	0.0172384		dapD	b0166	-2.14503	2.84963e-06			dapD	b0166	0.35871	0.515588		dapD	b0166	-0.417111	0.487308		dapD	b0166	-1.21249	0.00601971			dapD	b0166
dapE	b2472	-2.31433	6.19003e-05		dapE	b2472	-2.27046	0.000132377		dapE	b2472	-2.68133	1.60799e-06			dapE	b2472	-2.45969	8.38947e-06		dapE	b2472	-2.12295	0.000468097		dapE	b2472	-2.7523	3.22576e-06			dapE	b2472	-2.58052	2.84954e-06		dapE	b2472	-2.2967	8.377e-05		dapE	b2472	-3.00744	5.56195e-08			dapE	b2472
dapF	b3809	1.32248	0.000206275		dapF	b3809	0.51964	0.243315		dapF	b3809	0.852404	0.0200091			dapF	b3809	1.6857	2.53785e-07		dapF	b3809	0.233944	0.646052		dapF	b3809	0.429438	0.383985			dapF	b3809	1.76508	4.4613e-08		dapF	b3809	0.44628	0.320375		dapF	b3809	1.22513	0.000439668			dapF	b3809
dauA	b1206	-2.60241	2.54772e-06		dauA	b1206	-0.226949	0.79622		dauA	b1206	0.102354	0.911049			dauA	b1206	-3.00691	1.25631e-08		dauA	b1206	0.189784	0.836087		dauA	b1206	0.671208	0.345532			dauA	b1206	-3.10526	3.19679e-09		dauA	b1206	-0.590636	0.444585		dauA	b1206	-0.417019	0.579065			dauA	b1206
dbpA	b1343	1.90298	3.68595e-06		dbpA	b1343	1.07785	0.0211607		dbpA	b1343	1.22526	0.00545284			dbpA	b1343	1.80039	6.79435e-06		dbpA	b1343	0.250174	0.692944		dbpA	b1343	1.28645	0.00633199			dbpA	b1343	1.90847	2.01562e-06		dbpA	b1343	0.964403	0.0424324		dbpA	b1343	1.09053	0.014993			dbpA	b1343
dcd	b2065	-0.0318945	0.952792		dcd	b2065	-0.618461	0.166655		dcd	b2065	0.134858	0.799903			dcd	b2065	0.237188	0.589332		dcd	b2065	-0.307865	0.533947		dcd	b2065	-0.163709	0.764876			dcd	b2065	0.14409	0.780999		dcd	b2065	-0.230158	0.682014		dcd	b2065	-0.151471	0.770924			dcd	b2065
dcm	b1961	0.651417	0.328536		dcm	b1961	-0.110457	0.906504		dcm	b1961	-0.651674	0.309344			dcm	b1961	0.924535	0.0979594		dcm	b1961	0.21167	0.802402		dcm	b1961	-0.3682	0.642077			dcm	b1961	0.460051	0.497218		dcm	b1961	-0.188035	0.836624		dcm	b1961	-0.487306	0.476238			dcm	b1961
dcp	b1538	-0.381833	0.491452		dcp	b1538	-0.229467	0.726991		dcp	b1538	-0.0578717	0.937978			dcp	b1538	-0.616803	0.18065		dcp	b1538	-0.164887	0.809501		dcp	b1538	0.130572	0.8513			dcp	b1538	-0.340163	0.535465		dcp	b1538	0.53694	0.335818		dcp	b1538	0.222372	0.708617			dcp	b1538
dcrB	b3472	0.67429	0.279478		dcrB	b3472	-0.227557	0.774435		dcrB	b3472	-0.209087	0.783424			dcrB	b3472	0.727954	0.192173		dcrB	b3472	-0.558862	0.409092		dcrB	b3472	-0.022516	0.983396			dcrB	b3472	0.251412	0.733105		dcrB	b3472	-1.14336	0.048355		dcrB	b3472	-0.162576	0.828648			dcrB	b3472
dctA	b3528	0.8636	0.456134		dctA	b3528	0.835318	0.522224		dctA	b3528	1.12572	0.312287			dctA	b3528	0.644334	0.559202		dctA	b3528	0.415834	0.777735		dctA	b3528	1.85673	0.079782			dctA	b3528	1.32925	0.205778		dctA	b3528	0.075224	0.965569		dctA	b3528	3.12374	0.00060727			dctA	b3528
dctR	b3507	3.71028	1.64753e-11		dctR	b3507	1.84021	0.00181548		dctR	b3507	1.34025	0.0197942			dctR	b3507	3.23678	2.28797e-09		dctR	b3507	1.24446	0.0544728		dctR	b3507	1.08456	0.110467			dctR	b3507	2.70997	8.96753e-07		dctR	b3507	1.85984	0.00115463		dctR	b3507	0.85642	0.180921			dctR	b3507
dcuA	b4138	-1.39688	0.00318942		dcuA	b4138	-1.30027	0.0101676		dcuA	b4138	-0.297733	0.636536			dcuA	b4138	-1.82008	3.88052e-05		dcuA	b4138	-2.02784	2.01863e-05		dcuA	b4138	-0.436387	0.484978			dcuA	b4138	-1.85213	3.36363e-05		dcuA	b4138	-1.80121	0.000123011		dcuA	b4138	-0.109705	0.878356			dcuA	b4138
dcuB	b4123	0.0579155	0.964044		dcuB	b4123	-2.14493	0.0317575		dcuB	b4123	-2.02925	0.0190116			dcuB	b4123	-0.588841	0.589262		dcuB	b4123	-1.90554	0.0417005		dcuB	b4123	-2.59463	0.0616786			dcuB	b4123	-1.36555	0.160947		dcuB	b4123	-1.67766	0.0616869		dcuB	b4123	-0.929178	0.342453			dcuB	b4123
dcuC	b0621	-1.406	0.119735		dcuC	b0621	-2.37952	0.00110616		dcuC	b0621	-0.591639	0.502633			dcuC	b0621	-2.09267	0.00748772		dcuC	b0621	-2.21479	0.00227951		dcuC	b0621	-0.303325	0.795442			dcuC	b0621	-2.27275	0.0015725		dcuC	b0621	-2.49477	0.000212787		dcuC	b0621	-0.45463	0.636985			dcuC	b0621
dcuD	b3227	-1.68361	0.226593		dcuD	b3227	1.55699	0.0451213		dcuD	b3227	1.28859	0.0992908			dcuD	b3227	0.32381	0.737639		dcuD	b3227	0.426296	0.683355		dcuD	b3227	0.786527	0.488012			dcuD	b3227	-0.428174	0.664067		dcuD	b3227	0.683695	0.468189		dcuD	b3227	1.06016	0.214254			dcuD	b3227
dcuR	b4124	-1.45377	0.0673713		dcuR	b4124	0.0263741	0.981923		dcuR	b4124	0.596565	0.432594			dcuR	b4124	-0.642371	0.362779		dcuR	b4124	-1.31707	0.0664206		dcuR	b4124	0.694051	0.431981			dcuR	b4124	-1.16282	0.0742805		dcuR	b4124	-0.477048	0.577418		dcuR	b4124	1.25767	0.0575702			dcuR	b4124
dcuS	b4125	-0.625498	0.395588		dcuS	b4125	-0.0797763	0.933391		dcuS	b4125	1.07952	0.0760468			dcuS	b4125	-0.285708	0.686338		dcuS	b4125	-0.527367	0.477971		dcuS	b4125	0.465786	0.578658			dcuS	b4125	-0.126261	0.879089		dcuS	b4125	-0.646987	0.367336		dcuS	b4125	1.61423	0.00464517			dcuS	b4125
dcyD	b1919	-0.692086	0.248107		dcyD	b1919	-0.345501	0.651892		dcyD	b1919	-0.273711	0.69551			dcyD	b1919	-0.407492	0.486632		dcyD	b1919	0.0360473	0.970963		dcyD	b1919	-0.164439	0.841482			dcyD	b1919	-0.158202	0.829811		dcyD	b1919	0.754279	0.234983		dcyD	b1919	0.106277	0.890913			dcyD	b1919
ddlA	b0381	0.344424	0.397932		ddlA	b0381	-0.06548	0.907769		ddlA	b0381	0.22272	0.599458			ddlA	b0381	0.16682	0.684641		ddlA	b0381	-0.342818	0.424515		ddlA	b0381	-0.791715	0.0458855			ddlA	b0381	-0.027582	0.959444		ddlA	b0381	-0.109494	0.843601		ddlA	b0381	-0.0697859	0.888816			ddlA	b0381
ddlB	b0092	-0.880378	0.0080542		ddlB	b0092	-0.0261396	0.966822		ddlB	b0092	0.739322	0.0277707			ddlB	b0092	-0.759216	0.0162786		ddlB	b0092	-0.145299	0.775291		ddlB	b0092	0.328435	0.451246			ddlB	b0092	-0.609169	0.0694409		ddlB	b0092	-0.397063	0.340029		ddlB	b0092	0.444936	0.232421			ddlB	b0092
ddpA	b1487	0.378085	0.569634		ddpA	b1487	-0.624303	0.390581		ddpA	b1487	0.427579	0.518388			ddpA	b1487	-0.79948	0.14174		ddpA	b1487	1.4694	0.00622617		ddpA	b1487	1.37865	0.0191549			ddpA	b1487	0.729722	0.180093		ddpA	b1487	3.08963	2.15619e-11		ddpA	b1487	2.16302	9.58162e-06			ddpA	b1487
ddpB	b1486	0.44797	0.582139		ddpB	b1486	-0.901767	0.314749		ddpB	b1486	0.328722	0.695949			ddpB	b1486	-2.1384	0.00353133		ddpB	b1486	0.560042	0.488216		ddpB	b1486	0.851516	0.306497			ddpB	b1486	0.608499	0.380347		ddpB	b1486	2.17365	0.000155574		ddpB	b1486	1.40065	0.0275984			ddpB	b1486
ddpC	b1485	-0.314693	0.703939		ddpC	b1485	-0.460198	0.593619		ddpC	b1485	-0.170548	0.841557			ddpC	b1485	-0.824818	0.182131		ddpC	b1485	0.340704	0.673496		ddpC	b1485	1.00411	0.15157			ddpC	b1485	0.0474616	0.956603		ddpC	b1485	1.7651	0.000970921		ddpC	b1485	1.05053	0.0787843			ddpC	b1485
ddpD	b1484	-0.491218	0.526295		ddpD	b1484	0.0783645	0.937447		ddpD	b1484	-0.187583	0.822981			ddpD	b1484	-1.29442	0.0321759		ddpD	b1484	-0.259814	0.776623		ddpD	b1484	0.0474277	0.970306			ddpD	b1484	0.19448	0.804305		ddpD	b1484	1.53491	0.00836073		ddpD	b1484	0.4091	0.585504			ddpD	b1484
ddpF	b1483	-2.5936	1.10456e-06		ddpF	b1483	-2.01378	0.000396624		ddpF	b1483	-1.62744	0.00420021			ddpF	b1483	-1.12213	0.047668		ddpF	b1483	-1.37232	0.0251138		ddpF	b1483	-1.57683	0.00867452			ddpF	b1483	-1.20979	0.0386376		ddpF	b1483	-0.956569	0.151087		ddpF	b1483	-0.518691	0.453412			ddpF	b1483
ddpX	b1488	-0.192015	0.860696		ddpX	b1488	-1.0006	0.318084		ddpX	b1488	0.87364	0.233007			ddpX	b1488	0.161773	0.853332		ddpX	b1488	2.46742	6.11636e-05		ddpX	b1488	1.38066	0.0781495			ddpX	b1488	0.691728	0.330813		ddpX	b1488	4.04685	5.53944e-13		ddpX	b1488	2.81942	1.53223e-06			ddpX	b1488
deaD	b3162	1.00508	0.187385		deaD	b3162	0.37312	0.710562		deaD	b3162	0.487475	0.572523			deaD	b3162	1.00071	0.155357		deaD	b3162	0.990797	0.219527		deaD	b3162	0.274588	0.776433			deaD	b3162	0.308511	0.745679		deaD	b3162	-0.713733	0.430799		deaD	b3162	-1.19459	0.0996912			deaD	b3162
dedA	b2317	0.597554	0.241662		dedA	b2317	0.771894	0.103948		dedA	b2317	0.34823	0.485299			dedA	b2317	0.934931	0.0243738		dedA	b2317	1.15648	0.00730871		dedA	b2317	0.424904	0.421055			dedA	b2317	0.583196	0.209421		dedA	b2317	0.622934	0.20569		dedA	b2317	0.174149	0.758888			dedA	b2317
dedD	b2314	0.0145517	0.97779		dedD	b2314	-0.964618	0.0241453		dedD	b2314	-0.954475	0.0156405			dedD	b2314	0.448776	0.285088		dedD	b2314	-0.030556	0.967531		dedD	b2314	-0.230009	0.677869			dedD	b2314	0.283916	0.56832		dedD	b2314	-0.563593	0.238047		dedD	b2314	-0.700897	0.0938735			dedD	b2314
def	b3287	-2.35828	1.75107e-09		def	b3287	-1.94771	1.37875e-06		def	b3287	-2.14398	3.44946e-08			def	b3287	-2.09058	3.40234e-08		def	b3287	-1.5947	0.000137755		def	b3287	-1.98907	1.56221e-06			def	b3287	-2.14746	1.35414e-08		def	b3287	-1.92134	1.54035e-06		def	b3287	-1.93172	7.06282e-07			def	b3287
degP	b0161	-0.279549	0.704492		degP	b0161	0.675896	0.326896		degP	b0161	0.895627	0.129445			degP	b0161	-0.191627	0.778857		degP	b0161	0.407917	0.581199		degP	b0161	0.714053	0.276096			degP	b0161	-0.511475	0.435147		degP	b0161	0.284078	0.742539		degP	b0161	0.810355	0.17723			degP	b0161
degQ	b3234	0.072712	0.91382		degQ	b3234	-0.336291	0.585874		degQ	b3234	-0.00322663	0.996481			degQ	b3234	-0.533744	0.256173		degQ	b3234	-0.480097	0.390067		degQ	b3234	-0.390273	0.498855			degQ	b3234	-0.0683662	0.919658		degQ	b3234	-0.0156659	0.983459		degQ	b3234	-0.304944	0.590652			degQ	b3234
degS	b3235	-0.0629165	0.925484		degS	b3235	-0.377986	0.513064		degS	b3235	0.162367	0.783485			degS	b3235	0.0145522	0.984154		degS	b3235	-0.10197	0.882449		degS	b3235	0.19455	0.774269			degS	b3235	-0.0551284	0.932528		degS	b3235	-0.642389	0.182308		degS	b3235	0.300256	0.583737			degS	b3235
deoA	b4382	2.20989	6.97656e-09		deoA	b4382	2.11607	6.86088e-08		deoA	b4382	1.5666	9.74131e-05			deoA	b4382	1.64484	1.73019e-05		deoA	b4382	0.112463	0.87209		deoA	b4382	0.644189	0.187578			deoA	b4382	1.99555	1.52103e-07		deoA	b4382	-0.281844	0.651696		deoA	b4382	-0.00382103	0.995656			deoA	b4382
deoB	b4383	0.492829	0.38981		deoB	b4383	-0.0772148	0.923473		deoB	b4383	0.0864695	0.910557			deoB	b4383	0.224728	0.704532		deoB	b4383	-0.455711	0.463343		deoB	b4383	0.453146	0.451246			deoB	b4383	0.430685	0.465489		deoB	b4383	-0.765635	0.178124		deoB	b4383	-0.459293	0.426149			deoB	b4383
deoC	b4381	-0.978685	0.126191		deoC	b4381	-0.970016	0.155718		deoC	b4381	-0.407658	0.573002			deoC	b4381	-0.812994	0.177777		deoC	b4381	-0.527256	0.480222		deoC	b4381	0.829833	0.213967			deoC	b4381	-1.3429	0.0202064		deoC	b4381	-0.577979	0.451207		deoC	b4381	-0.883869	0.160594			deoC	b4381
deoD	b4384	-0.701037	0.158767		deoD	b4384	-1.04469	0.0314512		deoD	b4384	-0.325339	0.56527			deoD	b4384	-1.03471	0.017291		deoD	b4384	-1.05811	0.0283619		deoD	b4384	-0.041391	0.958604			deoD	b4384	-0.470068	0.374663		deoD	b4384	-1.24724	0.00700446		deoD	b4384	-0.367687	0.507663			deoD	b4384
deoR	b0840	-0.797769	0.133715		deoR	b0840	-1.0162	0.0419929		deoR	b0840	-0.877622	0.0550635			deoR	b0840	-0.756226	0.103097		deoR	b0840	-0.485503	0.381055		deoR	b0840	-0.963449	0.0880888			deoR	b0840	-0.701877	0.135115		deoR	b0840	-0.433951	0.44966		deoR	b0840	-0.41603	0.438213			deoR	b0840
der	b2511	-0.123953	0.78468		der	b2511	-0.0864453	0.862264		der	b2511	-0.4829	0.147043			der	b2511	-0.383345	0.246114		der	b2511	0.338535	0.379307		der	b2511	-0.203206	0.626522			der	b2511	0.015518	0.9766		der	b2511	-0.209083	0.644402		der	b2511	-0.395679	0.251393			der	b2511
dfp	b3639	-0.659447	0.425291		dfp	b3639	-0.757739	0.347697		dfp	b3639	0.0456831	0.966146			dfp	b3639	-0.547753	0.456274		dfp	b3639	0.270103	0.777355		dfp	b3639	0.502088	0.540905			dfp	b3639	-0.952888	0.172653		dfp	b3639	0.153113	0.884548		dfp	b3639	0.379236	0.644584			dfp	b3639
dgcZ	b1535	-0.895678	0.359127		dgcZ	b1535	-0.670371	0.512161		dgcZ	b1535	-1.43352	0.0666433			dgcZ	b1535	-0.581591	0.516281		dgcZ	b1535	1.0991	0.208663		dgcZ	b1535	-0.163581	0.888867			dgcZ	b1535	-0.940012	0.282678		dgcZ	b1535	-1.7233	0.0340011		dgcZ	b1535	-2.03938	0.00697821			dgcZ	b1535
dgkA	b4042	-0.262582	0.677365		dgkA	b4042	-0.197664	0.776583		dgkA	b4042	-1.10075	0.0111798			dgkA	b4042	0.0439687	0.943549		dgkA	b4042	-0.0569992	0.944271		dgkA	b4042	-0.869241	0.146495			dgkA	b4042	-0.236004	0.667505		dgkA	b4042	0.0376322	0.961563		dgkA	b4042	-0.686694	0.156505			dgkA	b4042
dgoA	b4477	-1.00703	0.320393		dgoA	b4477	2.75683	0.000133068		dgoA	b4477	2.77781	0.000138674			dgoA	b4477	-0.795668	0.353907		dgoA	b4477	2.62033	0.000382485		dgoA	b4477	3.98255	4.58768e-08			dgoA	b4477	-1.29414	0.1057		dgoA	b4477	-0.043765	0.974569		dgoA	b4477	0.66416	0.511306			dgoA	b4477
dgoD	b4478	-0.214189	0.851945		dgoD	b4478	2.86994	0.000103825		dgoD	b4478	1.85177	0.0112536			dgoD	b4478	0.083745	0.939027		dgoD	b4478	3.36079	3.37424e-06		dgoD	b4478	2.94103	3.25296e-05			dgoD	b4478	0.341713	0.733105		dgoD	b4478	1.39908	0.104639		dgoD	b4478	-0.24315	0.822909			dgoD	b4478
dgoK	b3693	-1.60063	0.0120024		dgoK	b3693	1.98779	0.000300585		dgoK	b3693	2.20917	4.80612e-05			dgoK	b3693	-1.81359	0.00140616		dgoK	b3693	1.57003	0.00709716		dgoK	b3693	2.69741	1.38519e-06			dgoK	b3693	-1.44813	0.00936565		dgoK	b3693	-1.20226	0.0600897		dgoK	b3693	-0.300565	0.718956			dgoK	b3693
dgoR	b4479	-1.9936	0.00694308		dgoR	b4479	1.34574	0.0852506		dgoR	b4479	2.55403	0.000156209			dgoR	b4479	-1.27443	0.0690254		dgoR	b4479	1.75922	0.0158996		dgoR	b4479	3.11298	5.14738e-06			dgoR	b4479	-1.2687	0.0783773		dgoR	b4479	-0.666144	0.482416		dgoR	b4479	0.368992	0.706807			dgoR	b4479
dgoT	b3691	-1.40689	0.127223		dgoT	b3691	0.664469	0.515923		dgoT	b3691	0.324589	0.739818			dgoT	b3691	-2.10168	0.00848601		dgoT	b3691	0.67033	0.489439		dgoT	b3691	2.01718	0.0063494			dgoT	b3691	-1.22271	0.105408		dgoT	b3691	-0.42398	0.714427		dgoT	b3691	-1.11859	0.201372			dgoT	b3691
dgt	b0160	0.0393302	0.953739		dgt	b0160	0.309211	0.674594		dgt	b0160	0.188162	0.78369			dgt	b0160	0.0682147	0.916655		dgt	b0160	0.239644	0.747157		dgt	b0160	0.148121	0.864942			dgt	b0160	0.121156	0.849751		dgt	b0160	1.18156	0.0151822		dgt	b0160	0.555191	0.330736			dgt	b0160
dhaK	b1200	-0.993847	0.381064		dhaK	b1200	-2.90797	0.00312234		dhaK	b1200	-0.939886	0.406298			dhaK	b1200	-0.948617	0.357825		dhaK	b1200	0.011966	0.996022		dhaK	b1200	1.27856	0.246694			dhaK	b1200	0.457913	0.721637		dhaK	b1200	-1.41161	0.209176		dhaK	b1200	3.81005	1.14584e-05			dhaK	b1200
dhaL	b1199	-0.488281	0.690964		dhaL	b1199	-2.4391	0.011582		dhaL	b1199	-1.31262	0.194501			dhaL	b1199	-0.409709	0.710636		dhaL	b1199	-0.406253	0.764961		dhaL	b1199	1.37436	0.186285			dhaL	b1199	0.342828	0.781262		dhaL	b1199	-1.19978	0.276395		dhaL	b1199	3.22665	0.000114519			dhaL	b1199
dhaM	b1198	-1.21242	0.191719		dhaM	b1198	-2.70783	0.00121137		dhaM	b1198	-1.7293	0.0415723			dhaM	b1198	-0.618197	0.507574		dhaM	b1198	-0.636801	0.558641		dhaM	b1198	0.0495768	0.975469			dhaM	b1198	-0.0203958	0.990464		dhaM	b1198	-1.76942	0.0468685		dhaM	b1198	2.19776	0.00609456			dhaM	b1198
dhaR	b1201	-0.650159	0.206972		dhaR	b1201	-0.110721	0.871237		dhaR	b1201	0.433114	0.363458			dhaR	b1201	-0.638146	0.139941		dhaR	b1201	-0.500523	0.325802		dhaR	b1201	-0.284966	0.688245			dhaR	b1201	0.0614701	0.917875		dhaR	b1201	0.211076	0.727989		dhaR	b1201	0.487395	0.307478			dhaR	b1201
diaA	b3149	-0.790233	0.0367319		diaA	b3149	-0.29017	0.570823		diaA	b3149	-0.0230553	0.970025			diaA	b3149	-0.521865	0.153606		diaA	b3149	0.0108392	0.989004		diaA	b3149	-0.337746	0.521384			diaA	b3149	-0.990018	0.00355086		diaA	b3149	-0.409111	0.373976		diaA	b3149	0.479398	0.244332			diaA	b3149
dicA	b1570	-0.537599	0.577149		dicA	b1570	-0.0403043	0.975783		dicA	b1570	-0.655875	0.446858			dicA	b1570	-0.300213	0.734542		dicA	b1570	0.150659	0.897903		dicA	b1570	-0.269671	0.826099			dicA	b1570	-0.943416	0.220243		dicA	b1570	0.426327	0.674813		dicA	b1570	0.328485	0.734495			dicA	b1570
dicB	b1575	4.87416	NA		dicB	b1575	1.17231	NA		dicB	b1575	1.02152	NA			dicB	b1575	2.37292	NA		dicB	b1575	1.4997	NA		dicB	b1575	1.95927	NA			dicB	b1575	-0.138644	NA		dicB	b1575	0.594791	NA		dicB	b1575	2.52768	NA			dicB	b1575
dicC	b1569	-1.7669	NA		dicC	b1569	-1.4786	NA		dicC	b1569	-1.22403	NA			dicC	b1569	-0.551801	NA		dicC	b1569	0.640111	NA		dicC	b1569	-0.28697	NA			dicC	b1569	-2.12591	NA		dicC	b1569	1.13466	NA		dicC	b1569	-1.80441	NA			dicC	b1569
dicF	b1574	0.515869	NA		dicF	b1574	-0.522621	NA		dicF	b1574	-1.4434	NA			dicF	b1574	-0.335521	NA		dicF	b1574	0.733267	NA		dicF	b1574	-0.504808	NA			dicF	b1574	0.44033	NA		dicF	b1574	-0.496114	NA		dicF	b1574	-2.02223	NA			dicF	b1574
dinB	b0231	-0.542478	0.556995		dinB	b0231	0.440352	0.615889		dinB	b0231	-0.598052	0.415144			dinB	b0231	-0.808579	0.266635		dinB	b0231	-0.640744	0.436103		dinB	b0231	-0.284624	0.779069			dinB	b0231	-1.07846	0.109535		dinB	b0231	-0.700899	0.375741		dinB	b0231	-0.91427	0.210127			dinB	b0231
dinD	b3645	0.210639	0.862419		dinD	b3645	-0.133382	0.927951		dinD	b3645	0.605902	0.511965			dinD	b3645	-0.0342988	0.9793		dinD	b3645	1.17182	0.187442		dinD	b3645	1.45988	0.11169			dinD	b3645	-0.483197	0.609118		dinD	b3645	0.16342	0.900508		dinD	b3645	0.517256	0.608427			dinD	b3645
dinF	b4044	-0.437743	0.617346		dinF	b4044	-0.514492	0.560293		dinF	b4044	-0.313467	0.710457			dinF	b4044	-0.420228	0.579785		dinF	b4044	-0.710305	0.37318		dinF	b4044	-0.647283	0.467263			dinF	b4044	-0.798797	0.263511		dinF	b4044	-0.644305	0.430799		dinF	b4044	-0.548986	0.487317			dinF	b4044
dinG	b0799	-0.146805	0.821667		dinG	b0799	0.0617242	0.93193		dinG	b0799	0.504925	0.318186			dinG	b0799	0.213614	0.684641		dinG	b0799	-0.547119	0.303018		dinG	b0799	0.615135	0.26057			dinG	b0799	-0.539585	0.264278		dinG	b0799	-0.700905	0.1583		dinG	b0799	0.199106	0.744708			dinG	b0799
dinI	b1061	-0.98496	0.440336		dinI	b1061	-0.510199	0.682016		dinI	b1061	-0.853337	0.381095			dinI	b1061	-1.50163	0.146267		dinI	b1061	-0.345562	0.786319		dinI	b1061	-0.421446	0.737643			dinI	b1061	-1.8667	0.0506398		dinI	b1061	-1.29912	0.186511		dinI	b1061	-1.04351	0.285603			dinI	b1061
dinJ	b0226	-3.055	4.58185e-10		dinJ	b0226	-1.29231	0.0121349		dinJ	b0226	-1.32189	0.00605651			dinJ	b0226	-3.41222	1.54302e-13		dinJ	b0226	-0.783062	0.166834		dinJ	b0226	-1.67212	0.00090623			dinJ	b0226	-3.49377	2.413e-15		dinJ	b0226	-1.25465	0.0132342		dinJ	b0226	-1.44933	0.00220491			dinJ	b0226
dinQ	b4613	-0.0860734	0.930135		dinQ	b4613	1.1122	0.0579445		dinQ	b4613	1.15796	0.0411166			dinQ	b4613	-0.662476	0.354133		dinQ	b4613	-0.331542	0.675472		dinQ	b4613	0.318638	0.746392			dinQ	b4613	0.00528622	0.996115		dinQ	b4613	-1.00107	0.112992		dinQ	b4613	0.945389	0.126465			dinQ	b4613
djlA	b0055	0.413278	0.527387		djlA	b0055	-0.0153198	0.987226		djlA	b0055	0.042073	0.954489			djlA	b0055	0.789127	0.106444		djlA	b0055	0.241971	0.722516		djlA	b0055	-0.260653	0.730152			djlA	b0055	0.667306	0.193338		djlA	b0055	-0.210429	0.775496		djlA	b0055	0.509152	0.349971			djlA	b0055
djlB	b0646	1.43197	0.412791		djlB	b0646	1.50896	0.327164		djlB	b0646	1.66196	0.257307			djlB	b0646	0.869194	0.602419		djlB	b0646	1.32153	0.379307		djlB	b0646	0.68784	NA			djlB	b0646	0.0254616	0.993626		djlB	b0646	1.01011	0.534326		djlB	b0646	1.61173	0.289486			djlB	b0646
djlC	b0649	0.639085	0.582139		djlC	b0649	-0.66277	0.550538		djlC	b0649	-0.419948	0.639769			djlC	b0649	0.958643	0.271087		djlC	b0649	0.509144	0.611435		djlC	b0649	-0.373981	0.734013			djlC	b0649	1.36923	0.0849394		djlC	b0649	0.390803	0.719512		djlC	b0649	-0.787869	0.352054			djlC	b0649
dkgA	b3012	-1.66872	0.00811421		dkgA	b3012	-0.849736	0.28099		dkgA	b3012	0.0258067	0.981916			dkgA	b3012	-1.22983	0.0504869		dkgA	b3012	-1.08395	0.136572		dkgA	b3012	0.312136	0.723726			dkgA	b3012	-1.22366	0.0624659		dkgA	b3012	0.175055	0.867704		dkgA	b3012	0.238644	0.785397			dkgA	b3012
dkgB	b0207	-1.53203	0.117763		dkgB	b0207	0.176571	0.884394		dkgB	b0207	0.189074	0.852876			dkgB	b0207	-2.64831	0.00308021		dkgB	b0207	0.878775	0.309278		dkgB	b0207	0.628879	0.504017			dkgB	b0207	-2.46686	0.00100867		dkgB	b0207	-0.105068	0.932469		dkgB	b0207	0.571662	0.507663			dkgB	b0207
dksA	b0145	-0.530943	0.326912		dksA	b0145	-0.488818	0.416774		dksA	b0145	-0.814468	0.0984782			dksA	b0145	-0.181363	0.75353		dksA	b0145	-0.275213	0.673999		dksA	b0145	-0.694445	0.194948			dksA	b0145	0.0388595	0.959444		dksA	b0145	-1.04927	0.0348616		dksA	b0145	-0.900991	0.0604142			dksA	b0145
dld	b2133	-0.740438	0.0519897		dld	b2133	-0.315921	0.524328		dld	b2133	0.0089578	0.988986			dld	b2133	-0.859472	0.0139085		dld	b2133	-0.634976	0.130531		dld	b2133	-0.457901	0.321147			dld	b2133	-0.712366	0.0555824		dld	b2133	-0.0641866	0.91722		dld	b2133	0.345259	0.434238			dld	b2133
dmlA	b1800	-0.125728	0.888908		dmlA	b1800	-1.70639	0.00513952		dmlA	b1800	-0.216835	0.783744			dmlA	b1800	-0.998693	0.0992293		dmlA	b1800	-0.81542	0.210643		dmlA	b1800	-0.00962366	0.991795			dmlA	b1800	-1.19819	0.0376456		dmlA	b1800	-1.84192	0.000781016		dmlA	b1800	-1.09603	0.0911967			dmlA	b1800
dmlR	b1799	-1.84742	0.0194208		dmlR	b1799	0.590347	0.59655		dmlR	b1799	0.841168	0.369806			dmlR	b1799	-2.3023	0.00154625		dmlR	b1799	0.304259	0.804844		dmlR	b1799	0.901668	0.376775			dmlR	b1799	-1.37935	0.0827222		dmlR	b1799	-0.136062	0.918982		dmlR	b1799	2.4058	0.00157894			dmlR	b1799
dmsA	b0894	-1.0526	0.123475		dmsA	b0894	-2.79059	2.55852e-07		dmsA	b0894	-2.07308	9.07222e-05			dmsA	b0894	-1.62251	0.00557445		dmsA	b0894	-2.25945	3.48655e-05		dmsA	b0894	-1.50301	0.0182904			dmsA	b0894	-1.20715	0.0359582		dmsA	b0894	-2.68532	1.68323e-07		dmsA	b0894	-2.05468	0.000160282			dmsA	b0894
dmsB	b0895	-1.75089	0.149706		dmsB	b0895	-3.17466	0.000544095		dmsB	b0895	-3.07928	0.000135736			dmsB	b0895	-1.20596	0.208697		dmsB	b0895	-2.14188	0.0123755		dmsB	b0895	-0.61365	0.570194			dmsB	b0895	-2.16882	0.0148971		dmsB	b0895	-2.16385	0.00695644		dmsB	b0895	-2.65455	0.00171849			dmsB	b0895
dmsC	b0896	-0.292217	0.698782		dmsC	b0896	-1.59138	0.00430199		dmsC	b0896	-1.20441	0.0194571			dmsC	b0896	-0.93196	0.0926557		dmsC	b0896	-1.40296	0.0116783		dmsC	b0896	-1.29788	0.0371643			dmsC	b0896	-1.2077	0.022076		dmsC	b0896	-1.08853	0.0487713		dmsC	b0896	-1.06404	0.0477238			dmsC	b0896
dmsD	b1591	1.56109	0.0019093		dmsD	b1591	-0.126755	0.884643		dmsD	b1591	0.77111	0.156771			dmsD	b1591	2.17892	7.19975e-07		dmsD	b1591	0.402278	0.545912		dmsD	b1591	0.831578	0.214757			dmsD	b1591	1.8656	2.72766e-05		dmsD	b1591	0.452512	0.489993		dmsD	b1591	0.65963	0.259926			dmsD	b1591
dnaA	b3702	1.44758	0.000133093		dnaA	b3702	0.111785	0.862107		dnaA	b3702	-0.356735	0.461452			dnaA	b3702	1.13948	0.00251619		dnaA	b3702	0.607969	0.192738		dnaA	b3702	-0.392581	0.429847			dnaA	b3702	1.27496	0.000827543		dnaA	b3702	-0.173155	0.787913		dnaA	b3702	-0.937173	0.0196861			dnaA	b3702
dnaB	b4052	1.1177	0.0306664		dnaB	b4052	0.978622	0.0869607		dnaB	b4052	0.379704	0.550313			dnaB	b4052	2.09627	3.85075e-06		dnaB	b4052	0.77618	0.191264		dnaB	b4052	0.855685	0.149261			dnaB	b4052	1.35379	0.00559752		dnaB	b4052	0.369258	0.614027		dnaB	b4052	0.947888	0.0772692			dnaB	b4052
dnaC	b4361	1.19702	0.0123748		dnaC	b4361	0.596062	0.325771		dnaC	b4361	0.559567	0.289173			dnaC	b4361	1.14851	0.00979277		dnaC	b4361	1.06265	0.0352763		dnaC	b4361	0.99714	0.0631119			dnaC	b4361	0.917158	0.0495923		dnaC	b4361	1.1648	0.014274		dnaC	b4361	0.577095	0.278269			dnaC	b4361
dnaE	b0184	0.940276	0.000264387		dnaE	b0184	1.08536	3.78107e-05		dnaE	b0184	0.392818	0.191847			dnaE	b0184	1.16139	2.15017e-06		dnaE	b0184	0.972297	0.000349764		dnaE	b0184	0.232474	0.502661			dnaE	b0184	0.969263	0.000137213		dnaE	b0184	0.426805	0.184229		dnaE	b0184	-0.00725966	0.986407			dnaE	b0184
dnaG	b3066	-0.380328	0.513297		dnaG	b3066	0.123618	0.87073		dnaG	b3066	-0.206704	0.748613			dnaG	b3066	-0.0591482	0.931251		dnaG	b3066	0.806432	0.127427		dnaG	b3066	-0.259596	0.685776			dnaG	b3066	-0.351962	0.546382		dnaG	b3066	-0.840953	0.112992		dnaG	b3066	-0.777462	0.118122			dnaG	b3066
dnaJ	b0015	0.0543514	0.940278		dnaJ	b0015	-0.512481	0.443145		dnaJ	b0015	-0.665825	0.247749			dnaJ	b0015	0.324045	0.588097		dnaJ	b0015	0.482285	0.461343		dnaJ	b0015	-0.101151	0.899813			dnaJ	b0015	0.358633	0.581972		dnaJ	b0015	-0.33635	0.653662		dnaJ	b0015	-0.76123	0.170196			dnaJ	b0015
dnaK	b0014	-0.796983	0.160588		dnaK	b0014	-0.297088	0.692172		dnaK	b0014	-0.917672	0.0954791			dnaK	b0014	0.264015	0.674288		dnaK	b0014	-0.375008	0.593409		dnaK	b0014	-0.928376	0.105252			dnaK	b0014	-0.572682	0.341089		dnaK	b0014	-1.67266	0.00118637		dnaK	b0014	-1.5444	0.00192738			dnaK	b0014
dnaN	b3701	1.37017	0.00387679		dnaN	b3701	0.0347739	0.969707		dnaN	b3701	-0.356876	0.554553			dnaN	b3701	1.49912	0.000905574		dnaN	b3701	0.220016	0.765144		dnaN	b3701	0.00571607	0.993777			dnaN	b3701	1.46177	0.00163039		dnaN	b3701	-0.596853	0.330687		dnaN	b3701	-0.953449	0.0577719			dnaN	b3701
dnaQ	b0215	1.45926	3.46599e-06		dnaQ	b0215	1.46066	3.5755e-06		dnaQ	b0215	0.0931222	0.841348			dnaQ	b0215	1.52011	2.30699e-07		dnaQ	b0215	1.10785	0.000959076		dnaQ	b0215	0.346624	0.41111			dnaQ	b0215	1.50378	1.74572e-07		dnaQ	b0215	0.945848	0.00396944		dnaQ	b0215	-0.107291	0.814783			dnaQ	b0215
dnaT	b4362	0.032486	0.96415		dnaT	b4362	0.323516	0.668623		dnaT	b4362	0.167182	0.815406			dnaT	b4362	-0.721577	0.195942		dnaT	b4362	0.510868	0.434942		dnaT	b4362	0.0368014	0.972735			dnaT	b4362	-0.833944	0.12776		dnaT	b4362	0.47122	0.488418		dnaT	b4362	0.283254	0.671742			dnaT	b4362
dnaX	b0470	1.33193	0.00207609		dnaX	b0470	0.666681	0.213562		dnaX	b0470	0.722502	0.134824			dnaX	b0470	1.67319	3.8729e-05		dnaX	b0470	0.501835	0.363579		dnaX	b0470	0.616784	0.242017			dnaX	b0470	1.39963	0.000956746		dnaX	b0470	-0.111395	0.882988		dnaX	b0470	0.490104	0.34348			dnaX	b0470
dosC	b1490	-2.1116	0.000825315		dosC	b1490	-0.48098	0.607434		dosC	b1490	-0.481934	0.553574			dosC	b1490	-2.77093	3.34086e-06		dosC	b1490	-0.349162	0.717892		dosC	b1490	-0.369224	0.68863			dosC	b1490	-2.16029	0.000414418		dosC	b1490	0.57904	0.519137		dosC	b1490	-0.828949	0.263019			dosC	b1490
dosP	b1489	-0.165576	0.860696		dosP	b1489	0.668217	0.431595		dosP	b1489	-0.336861	0.691868			dosP	b1489	-0.428408	0.559202		dosP	b1489	-0.259531	0.797075		dosP	b1489	-0.0422821	0.973886			dosP	b1489	0.121677	0.897208		dosP	b1489	1.05554	0.154335		dosP	b1489	-0.8444	0.246687			dosP	b1489
dppA	b3544	-0.24309	0.80504		dppA	b3544	0.823879	0.335814		dppA	b3544	3.50091	2.72122e-08			dppA	b3544	-0.593598	0.432198		dppA	b3544	-0.698734	0.418867		dppA	b3544	2.12596	0.00195091			dppA	b3544	0.289366	0.758038		dppA	b3544	0.203142	0.859054		dppA	b3544	4.02599	6.41546e-11			dppA	b3544
dppB	b3543	0.7826	0.399361		dppB	b3543	1.33766	0.146063		dppB	b3543	4.04946	2.77266e-07			dppB	b3543	0.254014	0.798732		dppB	b3543	-0.76472	0.462448		dppB	b3543	2.50309	0.00585492			dppB	b3543	1.47845	0.0653353		dppB	b3543	0.307839	0.812012		dppB	b3543	4.84988	2.31065e-10			dppB	b3543
dppC	b3542	0.401452	0.683953		dppC	b3542	0.658899	0.509586		dppC	b3542	2.53236	0.000670953			dppC	b3542	0.408488	0.643645		dppC	b3542	-1.02987	0.253483		dppC	b3542	1.13189	0.235257			dppC	b3542	1.1166	0.161622		dppC	b3542	-0.373422	0.753962		dppC	b3542	3.75303	9.13129e-08			dppC	b3542
dppD	b3541	0.0870301	0.936518		dppD	b3541	0.272018	0.818662		dppD	b3541	3.01747	7.05474e-05			dppD	b3541	0.30795	0.747428		dppD	b3541	-2.04425	0.0138867		dppD	b3541	1.69589	0.0615303			dppD	b3541	1.0765	0.198263		dppD	b3541	-0.405741	0.736443		dppD	b3541	4.02318	3.25557e-08			dppD	b3541
dppF	b3540	0.121546	0.915676		dppF	b3540	0.374591	0.738841		dppF	b3540	2.43163	0.00144205			dppF	b3540	-0.175881	0.860829		dppF	b3540	-1.39144	0.113957		dppF	b3540	1.0052	0.301791			dppF	b3540	0.882679	0.311119		dppF	b3540	-0.53076	0.635081		dppF	b3540	3.02295	3.5376e-05			dppF	b3540
dps	b0812	-2.18506	1.77344e-05		dps	b0812	-1.07162	0.0815045		dps	b0812	0.0914745	0.915964			dps	b0812	-2.15573	1.46625e-05		dps	b0812	-1.87095	0.000662813		dps	b0812	-0.907216	0.141872			dps	b0812	-2.26247	7.28702e-06		dps	b0812	-1.40136	0.0142216		dps	b0812	0.347999	0.621938			dps	b0812
dsbA	b3860	-0.100973	0.90827		dsbA	b3860	-1.40981	0.023125		dsbA	b3860	-1.05716	0.079851			dsbA	b3860	0.354393	0.599528		dsbA	b3860	0.570301	0.432566		dsbA	b3860	-0.361341	0.644806			dsbA	b3860	0.329904	0.659544		dsbA	b3860	-0.97282	0.139411		dsbA	b3860	-0.858962	0.172595			dsbA	b3860
dsbB	b1185	-2.86645	0.000149728		dsbB	b1185	-1.3397	0.0325193		dsbB	b1185	-0.867371	0.151586			dsbB	b1185	-1.22988	0.036999		dsbB	b1185	-0.143002	0.875563		dsbB	b1185	0.190013	0.824525			dsbB	b1185	-1.4303	0.0116683		dsbB	b1185	-0.43035	0.582505		dsbB	b1185	-0.254189	0.738123			dsbB	b1185
dsbC	b2893	-0.398095	0.356426		dsbC	b2893	0.162435	0.752295		dsbC	b2893	-0.0395872	0.94544			dsbC	b2893	0.324306	0.389523		dsbC	b2893	0.0909135	0.874091		dsbC	b2893	-0.301554	0.527059			dsbC	b2893	0.113894	0.808985		dsbC	b2893	0.0418903	0.945833		dsbC	b2893	0.225686	0.61086			dsbC	b2893
dsbD	b4136	0.475274	0.249764		dsbD	b4136	0.0764863	0.893677		dsbD	b4136	0.819994	0.0208162			dsbD	b4136	1.16583	0.000222359		dsbD	b4136	-1.05156	0.00452575		dsbD	b4136	0.481578	0.302804			dsbD	b4136	0.41337	0.287498		dsbD	b4136	0.0658084	0.909145		dsbD	b4136	0.905722	0.0109247			dsbD	b4136
dsbE	b2195	-0.157555	0.915732		dsbE	b2195	-0.0147631	0.99387		dsbE	b2195	-0.170486	0.905607			dsbE	b2195	0.454579	0.672015		dsbE	b2195	0.832132	0.468412		dsbE	b2195	0.544832	0.694486			dsbE	b2195	0.13277	0.919658		dsbE	b2195	-0.34784	0.812591		dsbE	b2195	-0.470366	0.717113			dsbE	b2195
dsbG	b0604	-0.436818	0.587997		dsbG	b0604	-0.431694	0.63845		dsbG	b0604	0.778635	0.288106			dsbG	b0604	-1.11585	0.074727		dsbG	b0604	-0.846299	0.273489		dsbG	b0604	0.0808984	0.950204			dsbG	b0604	-0.532949	0.465171		dsbG	b0604	-0.123022	0.905506		dsbG	b0604	0.861494	0.236073			dsbG	b0604
dsdA	b2366	0.939873	0.0946496		dsdA	b2366	-0.241927	0.753454		dsdA	b2366	-0.194062	0.76131			dsdA	b2366	-0.129476	0.856843		dsdA	b2366	0.321305	0.627738		dsdA	b2366	0.302319	0.679086			dsdA	b2366	0.352149	0.559416		dsdA	b2366	0.136377	0.85956		dsdA	b2366	-0.363626	0.553123			dsdA	b2366
dsdC	b2364	-0.96436	0.317896		dsdC	b2364	-0.735619	0.484886		dsdC	b2364	0.913162	0.310704			dsdC	b2364	-0.916675	0.242875		dsdC	b2364	-0.480299	0.633502		dsdC	b2364	1.32682	0.20242			dsdC	b2364	-0.743364	0.341066		dsdC	b2364	-0.835624	0.353771		dsdC	b2364	0.759227	0.442092			dsdC	b2364
dsdX	b2365	-0.973292	0.39125		dsdX	b2365	0.00630202	0.995826		dsdX	b2365	-0.213518	0.810153			dsdX	b2365	-0.760693	0.381532		dsdX	b2365	1.04753	0.17798		dsdX	b2365	-0.605389	0.570194			dsdX	b2365	-0.291356	0.751632		dsdX	b2365	0.963229	0.214766		dsdX	b2365	-0.404278	0.641557			dsdX	b2365
dsrA	b1954	-2.27912	0.000586381		dsrA	b1954	-1.54325	0.0298581		dsrA	b1954	-2.06109	0.00126112			dsrA	b1954	-2.03264	0.00122352		dsrA	b1954	-1.50187	0.0352763		dsrA	b1954	-2.36229	0.000400222			dsrA	b1954	-1.89912	0.00290776		dsrA	b1954	-2.58827	5.29027e-05		dsrA	b1954	-2.72695	9.48667e-06			dsrA	b1954
dsrB	b1952	-1.45596	0.0725922		dsrB	b1952	-0.484175	0.644047		dsrB	b1952	-1.06304	0.177917			dsrB	b1952	-1.90573	0.00846504		dsrB	b1952	-0.0110843	0.995235		dsrB	b1952	-0.89284	0.306497			dsrB	b1952	-1.93403	0.00702311		dsrB	b1952	-0.953035	0.292262		dsrB	b1952	-1.50718	0.0429284			dsrB	b1952
dtd	b3887	-0.696995	0.220312		dtd	b3887	-0.51883	0.435786		dtd	b3887	-0.382909	0.533304			dtd	b3887	-0.779999	0.117824		dtd	b3887	-1.62316	0.00270285		dtd	b3887	-1.6224	0.0114391			dtd	b3887	-0.146801	0.829811		dtd	b3887	-0.166879	0.838396		dtd	b3887	0.352334	0.576894			dtd	b3887
dtpA	b1634	-0.471502	0.703348		dtpA	b1634	-0.522365	0.693535		dtpA	b1634	0.0114246	0.99558			dtpA	b1634	-0.647052	0.53998		dtpA	b1634	-1.16601	0.288319		dtpA	b1634	0.112705	0.942289			dtpA	b1634	-0.569767	0.631098		dtpA	b1634	-3.30238	0.000233058		dtpA	b1634	-1.26773	0.210127			dtpA	b1634
dtpB	b3496	-1.15668	0.0212494		dtpB	b3496	-0.904651	0.0920986		dtpB	b3496	-0.505452	0.350404			dtpB	b3496	-0.899918	0.0574614		dtpB	b3496	-1.37609	0.00569268		dtpB	b3496	-0.729911	0.187939			dtpB	b3496	-1.41139	0.00179473		dtpB	b3496	-1.29838	0.00695644		dtpB	b3496	-0.966003	0.0447092			dtpB	b3496
dtpC	b4130	-1.16669	0.273796		dtpC	b4130	-0.032815	0.981041		dtpC	b4130	-0.0722979	0.949949			dtpC	b4130	0.109441	0.912878		dtpC	b4130	-0.273775	0.803157		dtpC	b4130	0.0795098	0.952393			dtpC	b4130	-0.368869	0.685613		dtpC	b4130	0.0969231	0.934848		dtpC	b4130	-0.645019	0.461043			dtpC	b4130
dtpD	b0709	1.47712	5.44606e-05		dtpD	b0709	1.02885	0.00953657		dtpD	b0709	-0.327461	0.462597			dtpD	b0709	0.616268	0.12188		dtpD	b0709	-0.216462	0.704407		dtpD	b0709	-0.253262	0.64748			dtpD	b0709	0.524718	0.208227		dtpD	b0709	-0.36616	0.47823		dtpD	b0709	-1.83584	1.59158e-06			dtpD	b0709
dusA	b4049	0.438566	0.410801		dusA	b4049	0.32088	0.571414		dusA	b4049	0.598886	0.179603			dusA	b4049	0.68518	0.106455		dusA	b4049	-0.0706888	0.919926		dusA	b4049	0.412815	0.460074			dusA	b4049	0.37046	0.457974		dusA	b4049	-0.282245	0.631672		dusA	b4049	0.167928	0.770924			dusA	b4049
dusB	b3260	1.73018	0.0335999		dusB	b3260	0.756976	0.474614		dusB	b3260	0.762477	0.426214			dusB	b3260	1.72443	0.026399		dusB	b3260	1.78045	0.0383148		dusB	b3260	0.997073	0.289911			dusB	b3260	1.58044	0.055264		dusB	b3260	-1.28683	0.168719		dusB	b3260	-0.121816	0.919413			dusB	b3260
dusC	b2140	0.868126	0.24064		dusC	b2140	0.478511	0.583513		dusC	b2140	0.778896	0.244664			dusC	b2140	0.897782	0.16121		dusC	b2140	1.7338	0.00528253		dusC	b2140	1.41583	0.0307665			dusC	b2140	1.15848	0.0614587		dusC	b2140	0.655836	0.40108		dusC	b2140	0.461254	0.54472			dusC	b2140
dut	b3640	0.939649	0.221297		dut	b3640	0.74045	0.389933		dut	b3640	0.699286	0.372173			dut	b3640	1.1578	0.0809296		dut	b3640	1.02101	0.189413		dut	b3640	0.773816	0.360362			dut	b3640	1.00847	0.156713		dut	b3640	0.61883	0.489402		dut	b3640	0.813153	0.285602			dut	b3640
dxr	b0173	0.629225	0.255267		dxr	b0173	-0.117112	0.883014		dxr	b0173	-0.959658	0.050089			dxr	b0173	0.890312	0.0599716		dxr	b0173	1.03341	0.045048		dxr	b0173	-0.58432	0.308768			dxr	b0173	0.826366	0.097996		dxr	b0173	-0.454841	0.481645		dxr	b0173	-1.36229	0.00360364			dxr	b0173
dxs	b0420	1.0267	0.00251683		dxs	b0420	1.04193	0.00323655		dxs	b0420	0.00209806	0.997032			dxs	b0420	1.40031	8.09161e-06		dxs	b0420	1.26323	0.00024158		dxs	b0420	0.171853	0.723222			dxs	b0420	1.15922	0.00037404		dxs	b0420	0.456113	0.29333		dxs	b0420	-0.228121	0.606801			dxs	b0420
eaeH	b0297	2.5829	NA		eaeH	b0297	0.775426	NA		eaeH	b0297	0.0423162	NA			eaeH	b0297	-0.31633	NA		eaeH	b0297	-1.13174	NA		eaeH	b0297	0.484528	NA			eaeH	b0297	-1.69747	NA		eaeH	b0297	-0.99562	NA		eaeH	b0297	-0.564289	NA			eaeH	b0297
eamA	b1533	-0.535045	0.364302		eamA	b1533	0.803111	0.164329		eamA	b1533	0.400998	0.463278			eamA	b1533	-1.48798	0.00164758		eamA	b1533	1.10374	0.0288813		eamA	b1533	-0.0256349	0.980537			eamA	b1533	-0.861381	0.0591499		eamA	b1533	2.08848	9.10624e-07		eamA	b1533	0.782316	0.109965			eamA	b1533
eamB	b2578	-1.97102	0.0221599		eamB	b2578	-2.00774	0.0100213		eamB	b2578	-1.99938	0.00178298			eamB	b2578	-2.65721	0.000628053		eamB	b2578	-0.617272	0.480901		eamB	b2578	-2.99485	0.000241257			eamB	b2578	-1.67676	0.0149733		eamB	b2578	-2.02349	0.00353015		eamB	b2578	-2.56474	8.36179e-05			eamB	b2578
ebgA	b3076	-0.139922	0.877891		ebgA	b3076	0.327126	0.736025		ebgA	b3076	0.378548	0.623578			ebgA	b3076	-0.698422	0.266292		ebgA	b3076	0.576393	0.476587		ebgA	b3076	1.3358	0.0532092			ebgA	b3076	-0.741945	0.231356		ebgA	b3076	0.479607	0.574654		ebgA	b3076	0.648365	0.363114			ebgA	b3076
ebgC	b3077	-0.858776	0.77702		ebgC	b3077	-1.35191	NA		ebgC	b3077	-1.21046	NA			ebgC	b3077	-1.81188	0.459521		ebgC	b3077	0.220388	NA		ebgC	b3077	0.793804	NA			ebgC	b3077	0.946285	0.629431		ebgC	b3077	-2.75435	NA		ebgC	b3077	-1.25387	NA			ebgC	b3077
ebgR	b3075	-0.861219	0.371103		ebgR	b3075	-0.58801	0.542402		ebgR	b3075	0.819678	0.339173			ebgR	b3075	0.121901	0.899781		ebgR	b3075	-1.31893	0.103622		ebgR	b3075	1.07411	0.258718			ebgR	b3075	-0.385892	0.676973		ebgR	b3075	-1.37598	0.0742073		ebgR	b3075	0.56094	0.562203			ebgR	b3075
ecnA	b4410	2.07921	0.0506207		ecnA	b4410	0.789587	0.591012		ecnA	b4410	0.937788	0.319209			ecnA	b4410	1.60014	0.113735		ecnA	b4410	2.54417	0.00771858		ecnA	b4410	0.552796	0.687939			ecnA	b4410	1.04183	0.352303		ecnA	b4410	1.23996	0.281508		ecnA	b4410	0.749023	0.467394			ecnA	b4410
ecnB	b4411	-2.06718	0.00313072		ecnB	b4411	-1.43058	0.0752397		ecnB	b4411	-2.10043	0.00299548			ecnB	b4411	-2.2645	0.000711107		ecnB	b4411	-0.600087	0.522203		ecnB	b4411	-2.61427	0.000229195			ecnB	b4411	-1.51426	0.0389639		ecnB	b4411	-2.17343	0.00277097		ecnB	b4411	-2.03772	0.00369838			ecnB	b4411
eco	b2209	0.360299	0.644016		eco	b2209	-0.560861	0.481735		eco	b2209	-0.776066	0.252321			eco	b2209	1.01622	0.0879479		eco	b2209	-1.21853	0.0664206		eco	b2209	-1.54335	0.0158014			eco	b2209	0.174463	0.836482		eco	b2209	-2.41764	2.86929e-05		eco	b2209	-1.52957	0.0104153			eco	b2209
ecpA	b0293	1.11561	0.158767		ecpA	b0293	1.53755	0.0378609		ecpA	b0293	-0.0368973	0.973611			ecpA	b0293	0.348793	0.68955		ecpA	b0293	0.942092	0.248574		ecpA	b0293	-1.08451	0.368841			ecpA	b0293	0.362398	0.675185		ecpA	b0293	0.923637	0.255917		ecpA	b0293	-0.227592	0.81314			ecpA	b0293
ecpB	b0292	-0.308563	0.908388		ecpB	b0292	-0.209315	NA		ecpB	b0292	-1.41457	NA			ecpB	b0292	0.122027	0.95475		ecpB	b0292	0.32053	NA		ecpB	b0292	-1.07464	NA			ecpB	b0292	-0.20662	0.922516		ecpB	b0292	-0.424859	NA		ecpB	b0292	-2.72489	NA			ecpB	b0292
ecpC	b0291	1.16223	0.0540184		ecpC	b0291	0.0703967	0.938665		ecpC	b0291	0.10529	0.892082			ecpC	b0291	0.880838	0.121833		ecpC	b0291	0.243852	0.763688		ecpC	b0291	0.822341	0.182228			ecpC	b0291	0.201379	0.7891		ecpC	b0291	0.121184	0.888602		ecpC	b0291	-0.250852	0.722943			ecpC	b0291
ecpD	b0290	-0.0889543	0.907874		ecpD	b0290	1.09248	0.0269104		ecpD	b0290	0.722935	0.136044			ecpD	b0290	-0.993875	0.0481884		ecpD	b0290	0.566838	0.317611		ecpD	b0290	0.715354	0.189177			ecpD	b0290	-0.769319	0.125426		ecpD	b0290	0.164291	0.830031		ecpD	b0290	0.0201141	0.975234			ecpD	b0290
ecpE	b0289	-0.373512	0.678195		ecpE	b0289	1.10882	0.0960263		ecpE	b0289	-0.14338	0.8547			ecpE	b0289	-0.550753	0.420912		ecpE	b0289	0.842984	0.218217		ecpE	b0289	-0.514723	0.558744			ecpE	b0289	-0.208177	0.783208		ecpE	b0289	0.766947	0.267545		ecpE	b0289	-1.21413	0.0533413			ecpE	b0289
ecpR	b0294	3.32388	NA		ecpR	b0294	2.23319	NA		ecpR	b0294	-4.15105	NA			ecpR	b0294	-0.494733	NA		ecpR	b0294	1.55052	NA		ecpR	b0294	-0.161033	NA			ecpR	b0294	-1.68651	NA		ecpR	b0294	-0.400424	NA		ecpR	b0294	-3.29383	NA			ecpR	b0294
eda	b1850	-0.703513	0.312627		eda	b1850	-1.82734	0.00264263		eda	b1850	-0.60933	0.384624			eda	b1850	-0.0147062	0.989375		eda	b1850	-0.717205	0.316996		eda	b1850	0.363699	0.654887			eda	b1850	0.0188222	0.98695		eda	b1850	-0.734714	0.321118		eda	b1850	0.101934	0.908894			eda	b1850
edd	b1851	0.30115	0.664365		edd	b1851	-1.29738	0.0170137		edd	b1851	-0.0521211	0.951541			edd	b1851	0.938154	0.0657118		edd	b1851	-0.677663	0.269146		edd	b1851	0.832656	0.164211			edd	b1851	0.591944	0.31523		edd	b1851	-0.926322	0.109258		edd	b1851	0.660985	0.253071			edd	b1851
efeB	b1019	0.447364	0.53382		efeB	b1019	-0.399262	0.685885		efeB	b1019	-0.456581	0.53887			efeB	b1019	0.745125	0.189415		efeB	b1019	0.295926	0.747157		efeB	b1019	0.102072	0.930224			efeB	b1019	1.46366	0.00402379		efeB	b1019	0.399816	0.642742		efeB	b1019	0.257315	0.756096			efeB	b1019
efeO	b1018	1.08582	0.023631		efeO	b1018	0.19616	0.818809		efeO	b1018	1.26943	0.0247306			efeO	b1018	1.24457	0.00420765		efeO	b1018	-0.118304	0.895396		efeO	b1018	1.16773	0.114797			efeO	b1018	1.68206	6.65765e-05		efeO	b1018	0.167363	0.8447		efeO	b1018	1.61494	0.00365582			efeO	b1018
efp	b4147	-0.560379	0.451492		efp	b4147	0.291058	0.743769		efp	b4147	0.636269	0.370476			efp	b4147	-0.0212796	0.983396		efp	b4147	1.15953	0.0827957		efp	b4147	1.06301	0.115936			efp	b4147	-0.0461605	0.962523		efp	b4147	0.442304	0.611685		efp	b4147	1.15261	0.0660346			efp	b4147
elaA	b2267	-1.90219	0.00478849		elaA	b2267	-1.73163	0.0160621		elaA	b2267	-0.150854	0.879649			elaA	b2267	-1.75267	0.00567729		elaA	b2267	-1.00214	0.20115		elaA	b2267	-0.0300859	0.982718			elaA	b2267	-1.38926	0.0364738		elaA	b2267	-0.609431	0.494073		elaA	b2267	0.147667	0.880453			elaA	b2267
elaB	b2266	-2.12609	0.000521143		elaB	b2266	-1.82943	0.00599229		elaB	b2266	-1.97574	0.00174797			elaB	b2266	-1.31454	0.0378974		elaB	b2266	-1.40193	0.0447904		elaB	b2266	-1.58715	0.0185087			elaB	b2266	-1.18559	0.0785421		elaB	b2266	-1.43383	0.0404616		elaB	b2266	-1.23321	0.0665247			elaB	b2266
elaD	b2269	-2.43869	NA		elaD	b2269	-1.88205	NA		elaD	b2269	0.238965	NA			elaD	b2269	0.770302	NA		elaD	b2269	-1.15153	NA		elaD	b2269	-1.40914	NA			elaD	b2269	-0.303198	NA		elaD	b2269	-0.0612063	NA		elaD	b2269	0.793012	NA			elaD	b2269
elbB	b3209	-1.84287	0.00658553		elbB	b3209	-1.11779	0.165686		elbB	b3209	0.30231	0.744067			elbB	b3209	-1.52729	0.0169862		elbB	b3209	-1.40968	0.061362		elbB	b3209	-0.130417	0.91002			elbB	b3209	-1.26809	0.0595021		elbB	b3209	-0.446282	0.644402		elbB	b3209	0.130912	0.897311			elbB	b3209
elfA	b0938	-0.166846	0.926051		elfA	b0938	2.16358	0.0955992		elfA	b0938	0.421364	0.796638			elfA	b0938	-1.36855	0.33602		elfA	b0938	1.46691	0.29328		elfA	b0938	-1.03312	NA			elfA	b0938	-1.22902	0.33252		elfA	b0938	1.6018	0.238047		elfA	b0938	0.799088	0.596			elfA	b0938
elfC	b0940	1.73109	0.0716693		elfC	b0940	0.0200721	0.990537		elfC	b0940	0.0804394	0.951541			elfC	b0940	0.691225	0.515685		elfC	b0940	1.10991	0.246324		elfC	b0940	0.330411	0.80084			elfC	b0940	1.43511	0.110643		elfC	b0940	0.841608	0.417489		elfC	b0940	0.565674	0.586013			elfC	b0940
elfD	b0939	0.703569	0.861792		elfD	b0939	2.5069	0.410415		elfD	b0939	0.276298	NA			elfD	b0939	-0.133803	0.976754		elfD	b0939	1.82691	0.568465		elfD	b0939	1.47205	NA			elfD	b0939	1.47852	0.624883		elfD	b0939	1.13369	NA		elfD	b0939	0.447472	NA			elfD	b0939
elfG	b0941	0.725896	0.445306		elfG	b0941	0.885069	0.384687		elfG	b0941	0.30926	0.747724			elfG	b0941	-0.727007	0.436778		elfG	b0941	0.671492	0.505785		elfG	b0941	-0.930688	0.451246			elfG	b0941	-0.0879011	0.938671		elfG	b0941	1.11735	0.203251		elfG	b0941	-0.178322	0.871024			elfG	b0941
emrA	b2685	0.348973	0.644016		emrA	b2685	0.872375	0.195813		emrA	b2685	-0.322128	0.655631			emrA	b2685	0.187359	0.796243		emrA	b2685	0.123495	0.89709		emrA	b2685	-0.222043	0.78996			emrA	b2685	0.0998751	0.90511		emrA	b2685	0.186574	0.843601		emrA	b2685	-0.897917	0.144989			emrA	b2685
emrB	b2686	0.532477	0.235709		emrB	b2686	0.269522	0.621982		emrB	b2686	-0.588821	0.139575			emrB	b2686	0.269682	0.542617		emrB	b2686	0.500614	0.272976		emrB	b2686	0.43311	0.350869			emrB	b2686	0.279871	0.5467		emrB	b2686	0.00215888	0.996253		emrB	b2686	-0.490465	0.246444			emrB	b2686
emrD	b3673	-0.0858066	0.953513		emrD	b3673	-0.207315	0.899831		emrD	b3673	0.10309	0.951541			emrD	b3673	0.0201743	0.990795		emrD	b3673	0.11617	0.948616		emrD	b3673	1.34804	0.261565			emrD	b3673	-0.198866	0.894		emrD	b3673	-2.42497	0.021399		emrD	b3673	2.2308	0.0260156			emrD	b3673
emrE	b0543	-2.5579	0.243233		emrE	b0543	-2.57204	0.0944602		emrE	b0543	-1.90685	0.0870884			emrE	b0543	-2.26086	0.172753		emrE	b0543	-0.108605	0.957364		emrE	b0543	-1.65082	0.244248			emrE	b0543	-1.58971	0.252368		emrE	b0543	-3.59132	0.00695644		emrE	b0543	-1.89745	0.104486			emrE	b0543
emrK	b2368	-0.864906	0.728064		emrK	b2368	0.44064	0.858055		emrK	b2368	-0.706628	NA			emrK	b2368	-1.37878	0.478632		emrK	b2368	1.06501	0.580885		emrK	b2368	0.0322313	NA			emrK	b2368	-1.57455	0.377976		emrK	b2368	0.678441	0.761393		emrK	b2368	-0.40806	0.842298			emrK	b2368
emrY	b2367	0.260471	0.938936		emrY	b2367	0.964674	NA		emrY	b2367	0.386961	NA			emrY	b2367	-1.94328	0.493561		emrY	b2367	4.60532	NA		emrY	b2367	0.832179	NA			emrY	b2367	1.54482	0.499511		emrY	b2367	3.81898	NA		emrY	b2367	1.20027	NA			emrY	b2367
emtA	b1193	-1.00844	0.0442032		emtA	b1193	-0.160309	0.829011		emtA	b1193	-0.343971	0.540903			emtA	b1193	-1.25684	0.00467083		emtA	b1193	0.443262	0.453658		emtA	b1193	-0.544959	0.37886			emtA	b1193	-1.50167	0.000468974		emtA	b1193	0.282812	0.674813		emtA	b1193	-0.402534	0.47814			emtA	b1193
endA	b2945	-1.5632	0.146773		endA	b2945	-1.33551	0.220118		endA	b2945	-1.33427	0.0989721			endA	b2945	-2.34799	0.0120291		endA	b2945	-0.111949	0.932472		endA	b2945	-0.207013	0.875638			endA	b2945	-2.07011	0.00726432		endA	b2945	-0.681326	0.49511		endA	b2945	-1.06099	0.232963			endA	b2945
eno	b2779	0.984858	0.0636196		eno	b2779	0.605546	0.34715		eno	b2779	0.27815	0.681465			eno	b2779	1.27766	0.00852751		eno	b2779	0.845446	0.147403		eno	b2779	0.465523	0.465488			eno	b2779	1.02976	0.0492299		eno	b2779	0.144402	0.864837		eno	b2779	-0.0903475	0.906835			eno	b2779
entA	b0596	-0.146824	0.847985		entA	b0596	-0.996022	0.0931814		entA	b0596	0.474594	0.45965			entA	b0596	0.807061	0.125071		entA	b0596	-2.15019	3.58548e-05		entA	b0596	0.276193	0.717745			entA	b0596	0.161169	0.827225		entA	b0596	-0.563036	0.408171		entA	b0596	1.29371	0.0142899			entA	b0596
entB	b0595	-0.87846	0.1804		entB	b0595	-1.19752	0.0695261		entB	b0595	0.62618	0.376459			entB	b0595	0.50179	0.442489		entB	b0595	-2.71808	2.33457e-06		entB	b0595	0.418287	0.609169			entB	b0595	-0.171603	0.836482		entB	b0595	-0.672205	0.374215		entB	b0595	1.79091	0.00191797			entB	b0595
entC	b0593	0.806556	0.336035		entC	b0593	0.454598	0.661514		entC	b0593	1.23577	0.109408			entC	b0593	1.95175	0.00364		entC	b0593	-1.24617	0.129407		entC	b0593	1.73949	0.0224887			entC	b0593	1.09272	0.158288		entC	b0593	0.192323	0.871166		entC	b0593	2.01243	0.00436622			entC	b0593
entD	b0583	-0.472849	0.714059		entD	b0583	0.149098	0.919263		entD	b0583	1.52672	0.116688			entD	b0583	-0.0959481	0.942099		entD	b0583	-1.35633	0.203083		entD	b0583	0.0737067	0.973187			entD	b0583	0.420555	0.719682		entD	b0583	-0.385052	0.779843		entD	b0583	2.37878	0.00807348			entD	b0583
entE	b0594	-0.147143	0.883292		entE	b0594	-0.550852	0.542511		entE	b0594	0.72473	0.352848			entE	b0594	0.987828	0.142735		entE	b0594	-2.19559	0.00118381		entE	b0594	0.270164	0.777824			entE	b0594	0.37343	0.668259		entE	b0594	-0.571458	0.531006		entE	b0594	1.24101	0.0749078			entE	b0594
entF	b0586	-0.374188	0.569634		entF	b0586	-0.601464	0.368767		entF	b0586	0.109095	0.894776			entF	b0586	0.601774	0.272917		entF	b0586	-1.75675	0.00118381		entF	b0586	-0.319912	0.682686			entF	b0586	0.31964	0.633745		entF	b0586	-0.256533	0.757742		entF	b0586	1.39562	0.00764414			entF	b0586
entH	b0597	0.0437043	0.957342		entH	b0597	-0.621418	0.425736		entH	b0597	0.893782	0.192826			entH	b0597	1.04314	0.0702692		entH	b0597	-2.39378	0.000129876		entH	b0597	0.455159	0.618933			entH	b0597	0.524326	0.456822		entH	b0597	-0.164848	0.864837		entH	b0597	2.13493	0.000244252			entH	b0597
entS	b0591	0.151846	0.853656		entS	b0591	-0.155558	0.858948		entS	b0591	0.60623	0.343913			entS	b0591	0.449008	0.460963		entS	b0591	-0.654424	0.332338		entS	b0591	0.976082	0.125968			entS	b0591	0.450639	0.496159		entS	b0591	-0.72423	0.280672		entS	b0591	0.809047	0.182187			entS	b0591
envC	b3613	2.31965	8.1785e-08		envC	b3613	1.11023	0.0266486		envC	b3613	0.66493	0.196757			envC	b3613	2.70698	5.3369e-11		envC	b3613	0.882391	0.0945817		envC	b3613	0.443352	0.467149			envC	b3613	2.44608	5.12449e-09		envC	b3613	0.918375	0.0767367		envC	b3613	0.538085	0.314352			envC	b3613
envY	b0566	-0.434544	0.828047		envY	b0566	-0.707502	0.699534		envY	b0566	0.640092	0.589277			envY	b0566	-1.90042	0.255342		envY	b0566	0.454144	0.768982		envY	b0566	-0.437284	NA			envY	b0566	-0.261825	0.857578		envY	b0566	0.860642	0.514438		envY	b0566	-1.0995	0.421799			envY	b0566
envZ	b3404	0.0174169	0.975058		envZ	b3404	-0.155354	0.814355		envZ	b3404	-0.700901	0.124881			envZ	b3404	0.000287734	0.999664		envZ	b3404	0.542987	0.289551		envZ	b3404	0.323474	0.560908			envZ	b3404	0.461549	0.341727		envZ	b3404	-0.36354	0.536084		envZ	b3404	-0.606834	0.200286			envZ	b3404
epd	b2927	0.162072	0.76025		epd	b2927	0.422891	0.376571		epd	b2927	0.648044	0.10447			epd	b2927	-0.102294	0.834613		epd	b2927	-0.125232	0.831862		epd	b2927	-0.344609	0.47416			epd	b2927	0.111389	0.833458		epd	b2927	-0.730185	0.0808418		epd	b2927	-0.000994647	0.998492			epd	b2927
epmA	b4155	0.680042	0.352815		epmA	b4155	0.26677	0.762263		epmA	b4155	-1.41399	0.017118			epmA	b4155	0.617906	0.351713		epmA	b4155	1.30802	0.0410036		epmA	b4155	-1.58281	0.0138055			epmA	b4155	0.750882	0.269173		epmA	b4155	-0.594338	0.455036		epmA	b4155	-1.53191	0.0093992			epmA	b4155
epmB	b4146	1.41389	0.00723749		epmB	b4146	1.39882	0.00652208		epmB	b4146	0.964309	0.0639005			epmB	b4146	1.83748	6.48087e-05		epmB	b4146	0.897083	0.114714		epmB	b4146	1.71318	0.00125519			epmB	b4146	1.67895	0.000287525		epmB	b4146	1.18085	0.0204028		epmB	b4146	1.51734	0.00178772			epmB	b4146
epmC	b2326	0.859287	0.48874		epmC	b2326	-0.656282	0.655511		epmC	b2326	-1.44515	0.191059			epmC	b2326	1.96525	0.0432581		epmC	b2326	1.26161	0.292118		epmC	b2326	-0.13857	0.934634			epmC	b2326	1.32735	0.226803		epmC	b2326	-0.643213	0.664828		epmC	b2326	-1.35832	0.226215			epmC	b2326
eptA	b4114	-0.676073	0.369834		eptA	b4114	-0.0712788	0.951495		eptA	b4114	-0.554285	0.451349			eptA	b4114	-2.04641	0.000973217		eptA	b4114	0.210781	0.833766		eptA	b4114	-1.74392	0.0549713			eptA	b4114	-1.11197	0.0719267		eptA	b4114	-0.0103972	0.992401		eptA	b4114	-0.602277	0.42853			eptA	b4114
eptB	b3546	0.0220279	0.977489		eptB	b3546	0.612979	0.417567		eptB	b3546	0.241908	0.764904			eptB	b3546	-0.410817	0.547123		eptB	b3546	0.708964	0.314325		eptB	b3546	0.271026	0.742291			eptB	b3546	-0.468809	0.517106		eptB	b3546	-0.3858	0.651696		eptB	b3546	0.789941	0.218176			eptB	b3546
eptC	b3955	0.906232	0.0297617		eptC	b3955	0.321615	0.559348		eptC	b3955	0.196492	0.704143			eptC	b3955	0.848359	0.028676		eptC	b3955	0.529321	0.261664		eptC	b3955	0.0353615	0.963782			eptC	b3955	0.588423	0.163363		eptC	b3955	0.344143	0.51741		eptC	b3955	-0.0653794	0.912388			eptC	b3955
era	b2566	0.787899	0.080424		era	b2566	0.548324	0.302924		era	b2566	0.0773572	0.909465			era	b2566	1.16476	0.00347403		era	b2566	0.823171	0.0822015		era	b2566	0.397829	0.45959			era	b2566	0.962608	0.0228208		era	b2566	0.257224	0.688663		era	b2566	-0.26947	0.624857			era	b2566
erpA	b0156	-0.57831	0.196552		erpA	b0156	-1.20727	0.00149459		erpA	b0156	-0.807968	0.0306418			erpA	b0156	-0.35101	0.402577		erpA	b0156	-0.549316	0.206169		erpA	b0156	-0.273746	0.580061			erpA	b0156	-0.653835	0.0944705		erpA	b0156	-0.66311	0.107686		erpA	b0156	-0.311299	0.488459			erpA	b0156
essD	b0554	2.12636	0.376013		essD	b0554	-2.09278	NA		essD	b0554	0.282425	NA			essD	b0554	-2.0065	0.483454		essD	b0554	1.58648	NA		essD	b0554	-0.551938	NA			essD	b0554	-0.550352	0.857475		essD	b0554	1.31678	NA		essD	b0554	-0.62009	NA			essD	b0554
essQ	b1556	1.9046	NA		essQ	b1556	-0.466061	NA		essQ	b1556	0.740341	NA			essQ	b1556	3.69862	NA		essQ	b1556	1.68259	NA		essQ	b1556	1.5064	NA			essQ	b1556	2.50563	NA		essQ	b1556	1.24996	NA		essQ	b1556	-1.41157	NA			essQ	b1556
etk	b0981	-0.404146	0.43728		etk	b0981	-0.420091	0.419475		etk	b0981	-1.00065	0.0072505			etk	b0981	-0.233407	0.622176		etk	b0981	-0.342471	0.501553		etk	b0981	-1.15778	0.00895136			etk	b0981	-0.658674	0.107365		etk	b0981	-0.287765	0.597357		etk	b0981	-0.784584	0.0458448			etk	b0981
etp	b0982	-1.56502	0.501653		etp	b0982	1.28524	0.322255		etp	b0982	-0.0816746	0.962551			etp	b0982	-0.516077	0.760183		etp	b0982	0.203197	0.911468		etp	b0982	1.14848	0.428366			etp	b0982	0.517546	0.7285		etp	b0982	0.72603	0.615488		etp	b0982	-0.00180194	0.998915			etp	b0982
eutA	b2451	-0.0298661	0.972965		eutA	b2451	-0.25003	0.805694		eutA	b2451	-1.28091	0.0450908			eutA	b2451	-0.199858	0.809049		eutA	b2451	-0.359758	0.70468		eutA	b2451	-0.243217	0.798825			eutA	b2451	0.00145584	0.998685		eutA	b2451	-0.366466	0.705532		eutA	b2451	-1.61175	0.014397			eutA	b2451
eutB	b2441	0.28186	0.617392		eutB	b2441	-0.329714	0.583227		eutB	b2441	0.0717471	0.915964			eutB	b2441	0.298867	0.552179		eutB	b2441	-0.290182	0.627565		eutB	b2441	-0.298097	0.609169			eutB	b2441	-0.197444	0.743317		eutB	b2441	-0.279606	0.660739		eutB	b2441	-0.177601	0.764336			eutB	b2441
eutC	b2440	-1.08338	0.189677		eutC	b2440	-1.30163	0.104961		eutC	b2440	-1.08111	0.121396			eutC	b2440	-0.582865	0.424577		eutC	b2440	-0.695075	0.399677		eutC	b2440	-0.436414	0.666757			eutC	b2440	-0.825982	0.23856		eutC	b2440	-0.717277	0.372987		eutC	b2440	-0.621094	0.435627			eutC	b2440
eutD	b2458	-0.139756	0.896456		eutD	b2458	-0.725255	0.501879		eutD	b2458	0.53761	0.561815			eutD	b2458	-1.60309	0.0294415		eutD	b2458	-0.338072	0.764961		eutD	b2458	0.17038	0.908023			eutD	b2458	-1.28756	0.0673058		eutD	b2458	-1.03283	0.252726		eutD	b2458	-0.494079	0.650855			eutD	b2458
eutE	b2455	0.806193	0.432331		eutE	b2455	0.689303	0.599016		eutE	b2455	0.110556	0.942814			eutE	b2455	-1.07517	0.264817		eutE	b2455	-0.376547	0.799266		eutE	b2455	-0.0468128	0.983396			eutE	b2455	-0.17046	0.889965		eutE	b2455	0.243732	0.870048		eutE	b2455	-0.756307	0.565733			eutE	b2455
eutG	b2453	-0.671548	0.51991		eutG	b2453	-0.0966957	0.949363		eutG	b2453	0.00737281	0.99558			eutG	b2453	-1.958	0.0203596		eutG	b2453	-0.5238	0.664981		eutG	b2453	-0.336178	0.83017			eutG	b2453	-1.3418	0.0984345		eutG	b2453	-0.385061	0.770397		eutG	b2453	-0.498907	0.670463			eutG	b2453
eutH	b2452	-0.664388	0.342221		eutH	b2452	-0.842879	0.240278		eutH	b2452	-1.41126	0.0106915			eutH	b2452	-0.869829	0.135152		eutH	b2452	-0.710611	0.308755		eutH	b2452	-0.29558	0.71528			eutH	b2452	-0.675263	0.272213		eutH	b2452	-0.873521	0.180258		eutH	b2452	-1.86562	0.00102643			eutH	b2452
eutJ	b2454	-0.5603	0.703375		eutJ	b2454	-0.79827	0.685129		eutJ	b2454	-2.02465	0.149723			eutJ	b2454	-2.51067	0.0386256		eutJ	b2454	0.329633	0.857432		eutJ	b2454	-3.42324	0.138116			eutJ	b2454	-1.25134	0.271995		eutJ	b2454	-0.309388	0.867704		eutJ	b2454	-0.617876	0.699745			eutJ	b2454
eutK	b2438	0.433797	0.611375		eutK	b2438	-0.559178	0.559615		eutK	b2438	-0.325601	0.681883			eutK	b2438	0.3334	0.661412		eutK	b2438	-0.111925	0.917946		eutK	b2438	-0.0355474	0.978631			eutK	b2438	0.392644	0.606866		eutK	b2438	-0.0402322	0.97063		eutK	b2438	-0.53764	0.48964			eutK	b2438
eutL	b2439	-1.40773	0.151697		eutL	b2439	-1.01437	0.326445		eutL	b2439	-1.13392	0.117678			eutL	b2439	-0.652674	0.402577		eutL	b2439	-0.0948799	0.939186		eutL	b2439	-0.791231	0.467263			eutL	b2439	-1.58202	0.0219427		eutL	b2439	-0.0550126	0.964432		eutL	b2439	-0.729458	0.372933			eutL	b2439
eutM	b2457	-1.1568	0.244779		eutM	b2457	-2.6333	0.0717351		eutM	b2457	1.46641	0.159843			eutM	b2457	-4.36741	0.000203414		eutM	b2457	-0.185335	0.898474		eutM	b2457	1.13198	0.434089			eutM	b2457	-2.80683	0.000455905		eutM	b2457	-0.870587	0.447703		eutM	b2457	0.885035	0.479398			eutM	b2457
eutN	b2456	-0.221173	0.926549		eutN	b2456	-1.06205	NA		eutN	b2456	-0.381864	NA			eutN	b2456	-1.86613	0.34385		eutN	b2456	-3.20815	NA		eutN	b2456	2.14428	NA			eutN	b2456	0.0810129	0.974945		eutN	b2456	-0.0492931	NA		eutN	b2456	-0.522991	NA			eutN	b2456
eutP	b2461	-1.48804	0.274608		eutP	b2461	-1.89266	0.21781		eutP	b2461	-1.03885	0.413342			eutP	b2461	-3.08754	0.0184499		eutP	b2461	-2.34408	0.0673849		eutP	b2461	-3.69185	NA			eutP	b2461	-1.54734	0.134698		eutP	b2461	-0.837509	0.537112		eutP	b2461	-0.0549338	0.973702			eutP	b2461
eutQ	b2460	-0.936301	0.441072		eutQ	b2460	-1.78092	0.205125		eutQ	b2460	0.754591	0.543876			eutQ	b2460	-2.07046	0.0428123		eutQ	b2460	-0.734239	0.571274		eutQ	b2460	-1.65232	0.495527			eutQ	b2460	-0.965442	0.338093		eutQ	b2460	-0.11881	0.940386		eutQ	b2460	0.369212	0.806502			eutQ	b2460
eutR	b2437	-0.572777	0.452663		eutR	b2437	-0.0637492	0.945814		eutR	b2437	0.16901	0.810423			eutR	b2437	-0.010872	0.990795		eutR	b2437	-0.110431	0.898845		eutR	b2437	-1.44727	0.0976566			eutR	b2437	-0.221655	0.748495		eutR	b2437	-0.345363	0.642274		eutR	b2437	-0.617834	0.325192			eutR	b2437
eutS	b2462	-2.05189	0.340445		eutS	b2462	-1.01832	0.660426		eutS	b2462	1.75042	NA			eutS	b2462	-3.82997	0.0650862		eutS	b2462	-2.47456	0.208663		eutS	b2462	1.95714	NA			eutS	b2462	-0.899945	0.619614		eutS	b2462	-1.79622	0.356105		eutS	b2462	1.64515	0.50033			eutS	b2462
eutT	b2459	-0.437774	0.644016		eutT	b2459	-1.43208	0.166655		eutT	b2459	-0.386914	0.691509			eutT	b2459	-1.15557	0.110413		eutT	b2459	-0.798916	0.380623		eutT	b2459	-0.329252	0.820026			eutT	b2459	-0.866667	0.222982		eutT	b2459	-1.01278	0.241603		eutT	b2459	-0.383965	0.714118			eutT	b2459
evgA	b2369	0.75358	0.233195		evgA	b2369	2.73913	2.06577e-07		evgA	b2369	1.17648	0.0253992			evgA	b2369	0.217525	0.749813		evgA	b2369	1.96369	0.000651639		evgA	b2369	0.888263	0.195644			evgA	b2369	0.8438	0.114766		evgA	b2369	2.5144	1.55599e-06		evgA	b2369	1.33245	0.0113293			evgA	b2369
evgS	b2370	0.0685152	0.940278		evgS	b2370	0.942292	0.190218		evgS	b2370	0.991081	0.129801			evgS	b2370	0.305112	0.684493		evgS	b2370	0.0528983	0.96486		evgS	b2370	0.648756	0.433496			evgS	b2370	0.0874727	0.92604		evgS	b2370	0.659412	0.390878		evgS	b2370	0.34046	0.684077			evgS	b2370
exbB	b3006	1.10001	0.032999		exbB	b3006	0.121714	0.883014		exbB	b3006	0.766645	0.166139			exbB	b3006	1.01749	0.0403486		exbB	b3006	-0.493864	0.444514		exbB	b3006	0.155297	0.83951			exbB	b3006	0.721373	0.194659		exbB	b3006	-0.725545	0.240156		exbB	b3006	0.757173	0.169971			exbB	b3006
exbD	b3005	1.15012	0.0468348		exbD	b3005	-0.285189	0.7261		exbD	b3005	-0.25802	0.736094			exbD	b3005	2.37092	2.43116e-06		exbD	b3005	-1.04249	0.0954519		exbD	b3005	-0.793927	0.226295			exbD	b3005	1.61335	0.00264793		exbD	b3005	-1.29201	0.0292524		exbD	b3005	-0.0458716	0.95934			exbD	b3005
exoD		-1.58878	0.604269		exoD		-2.67786	0.338659		exoD		0.622018	NA			exoD		1.83315	0.33113		exoD		-0.44289	0.865669		exoD		0.546866	NA			exoD		1.67434	0.403453		exoD		-0.812797	NA		exoD		1.2831	NA			exoD
exoX	b1844	0.289746	0.552723		exoX	b1844	0.239333	0.647054		exoX	b1844	0.408561	0.320783			exoX	b1844	0.455578	0.244678		exoX	b1844	0.061209	0.921246		exoX	b1844	-0.245099	0.637531			exoX	b1844	0.173457	0.7285		exoX	b1844	0.563937	0.174591		exoX	b1844	-0.0852715	0.873494			exoX	b1844
exuR	b3094	-0.150076	0.809811		exuR	b3094	-1.0649	0.0121505		exuR	b3094	-1.15636	0.00233748			exuR	b3094	0.126814	0.807081		exuR	b3094	-0.459412	0.344163		exuR	b3094	-0.888133	0.0522268			exuR	b3094	-0.585822	0.178916		exuR	b3094	-1.19883	0.00212933		exuR	b3094	-0.716661	0.0833358			exuR	b3094
exuT	b3093	-1.48171	0.00686757		exuT	b3093	-1.28698	0.0214759		exuT	b3093	-2.00138	3.45439e-05			exuT	b3093	-2.07741	3.4717e-05		exuT	b3093	-0.858504	0.151441		exuT	b3093	-0.765207	0.200882			exuT	b3093	-1.77604	0.000323806		exuT	b3093	-1.03259	0.0709984		exuT	b3093	-2.22723	3.63382e-06			exuT	b3093
eyeA	b4690	1.34615	0.25451		eyeA	b4690	0.847108	0.463332		eyeA	b4690	-0.944269	0.278772			eyeA	b4690	1.47371	0.122231		eyeA	b4690	0.95918	0.347755		eyeA	b4690	0.34055	0.774269			eyeA	b4690	0.75928	0.496912		eyeA	b4690	0.426172	0.742248		eyeA	b4690	-1.25628	0.173337			eyeA	b4690
fabA	b0954	-0.046256	0.946023		fabA	b0954	-0.335461	0.618759		fabA	b0954	-0.424212	0.461452			fabA	b0954	-0.0991838	0.87686		fabA	b0954	0.546979	0.35056		fabA	b0954	-0.482853	0.414034			fabA	b0954	0.145716	0.829811		fabA	b0954	-0.133918	0.865025		fabA	b0954	-0.625256	0.238162			fabA	b0954
fabB	b2323	1.55103	0.0001139		fabB	b2323	0.244779	0.694177		fabB	b2323	0.729156	0.112543			fabB	b2323	1.60158	4.12515e-05		fabB	b2323	-0.0486425	0.951188		fabB	b2323	0.541029	0.286037			fabB	b2323	1.24154	0.00264044		fabB	b2323	0.207095	0.763008		fabB	b2323	0.661887	0.154674			fabB	b2323
fabD	b1092	0.754835	0.146598		fabD	b1092	0.459194	0.465337		fabD	b1092	1.05754	0.0296106			fabD	b1092	1.07295	0.0191993		fabD	b1092	0.737563	0.181849		fabD	b1092	0.934522	0.0744591			fabD	b1092	0.846828	0.0889713		fabD	b1092	0.0325578	0.97007		fabD	b1092	0.527661	0.337531			fabD	b1092
fabF	b1095	0.401181	0.428		fabF	b1095	-0.0363086	0.963761		fabF	b1095	-0.619929	0.178713			fabF	b1095	0.61266	0.153889		fabF	b1095	0.361828	0.504535		fabF	b1095	-0.401472	0.439724			fabF	b1095	0.622636	0.171746		fabF	b1095	-0.789217	0.0941285		fabF	b1095	-0.917112	0.0306063			fabF	b1095
fabG	b1093	-0.368346	0.459327		fabG	b1093	0.40383	0.455044		fabG	b1093	0.450678	0.347377			fabG	b1093	-0.154642	0.763807		fabG	b1093	0.762656	0.097152		fabG	b1093	0.340345	0.510623			fabG	b1093	-0.0882914	0.885233		fabG	b1093	-0.596938	0.232907		fabG	b1093	0.227604	0.671614			fabG	b1093
fabH	b1091	1.43476	0.000173798		fabH	b1091	0.0310928	0.96787		fabH	b1091	0.497087	0.285634			fabH	b1091	2.25432	2.85952e-10		fabH	b1091	0.861741	0.0505136		fabH	b1091	0.857415	0.0506177			fabH	b1091	1.66833	7.20803e-06		fabH	b1091	0.241724	0.693092		fabH	b1091	0.332154	0.505383			fabH	b1091
fabI	b1288	0.142861	0.814208		fabI	b1288	-0.557612	0.277323		fabI	b1288	0.0155906	0.982646			fabI	b1288	0.351306	0.448081		fabI	b1288	-0.663531	0.168232		fabI	b1288	0.311648	0.564507			fabI	b1288	0.150187	0.791724		fabI	b1288	-0.409907	0.459095		fabI	b1288	0.139343	0.812465			fabI	b1288
fabR	b3963	-2.37692	3.53746e-07		fabR	b3963	-1.35354	0.00632919		fabR	b3963	-1.20114	0.0109379			fabR	b3963	-1.88189	1.46625e-05		fabR	b3963	-1.64839	0.000663591		fabR	b3963	-1.13396	0.0358074			fabR	b3963	-2.32581	4.25222e-08		fabR	b3963	-1.73764	0.000148789		fabR	b3963	-0.70585	0.173438			fabR	b3963
fabZ	b0180	-0.636679	0.311524		fabZ	b0180	-0.244414	0.756912		fabZ	b0180	0.297071	0.674221			fabZ	b0180	-1.29878	0.0118861		fabZ	b0180	0.296652	0.697922		fabZ	b0180	-0.282789	0.705933			fabZ	b0180	-0.836138	0.147281		fabZ	b0180	-0.432256	0.569876		fabZ	b0180	0.0132799	0.986976			fabZ	b0180
fadA	b3845	-1.9555	0.0134287		fadA	b3845	0.0255872	0.987226		fadA	b3845	-0.410285	0.695512			fadA	b3845	-2.77667	0.000141979		fadA	b3845	0.488338	0.656796		fadA	b3845	2.31395	0.00341462			fadA	b3845	-1.57607	0.0483073		fadA	b3845	-0.332863	0.793807		fadA	b3845	0.264597	0.811233			fadA	b3845
fadB	b3846	-2.3965	0.0956912		fadB	b3846	-0.76043	0.699681		fadB	b3846	1.55133	0.326544			fadB	b3846	-2.90549	0.027165		fadB	b3846	1.8905	0.234071		fadB	b3846	5.6736	1.30602e-05			fadB	b3846	-1.17	0.477816		fadB	b3846	-0.813151	0.691614		fadB	b3846	2.86336	0.0380907			fadB	b3846
fadD	b1805	-1.61241	0.0350825		fadD	b1805	-0.405746	0.711404		fadD	b1805	-0.21846	0.841487			fadD	b1805	-1.43403	0.0484561		fadD	b1805	1.28678	0.122895		fadD	b1805	2.00559	0.00804024			fadD	b1805	-0.963155	0.235929		fadD	b1805	-0.359749	0.760889		fadD	b1805	0.973538	0.233238			fadD	b1805
fadE	b0221	-2.12533	0.0288352		fadE	b0221	-0.627362	0.649745		fadE	b0221	-0.557407	0.655003			fadE	b0221	-2.91215	0.00112514		fadE	b0221	2.03232	0.0505136		fadE	b0221	3.94793	1.61187e-05			fadE	b0221	-1.09052	0.324335		fadE	b0221	-0.29489	0.855011		fadE	b0221	0.464518	0.71752			fadE	b0221
fadH	b3081	-2.33127	0.0272707		fadH	b3081	-0.695881	0.648933		fadH	b3081	2.49377	0.0204668			fadH	b3081	-3.75342	0.000100715		fadH	b3081	1.78288	0.133297		fadH	b3081	5.49589	3.92706e-08			fadH	b3081	-2.01915	0.0586337		fadH	b3081	-1.59143	0.209501		fadH	b3081	3.25568	0.00145453			fadH	b3081
fadI	b2342	-2.39143	0.00542327		fadI	b2342	-1.14375	0.297058		fadI	b2342	0.534368	0.631756			fadI	b2342	-3.29752	4.08738e-05		fadI	b2342	1.25287	0.208663		fadI	b2342	2.78482	0.0011274			fadI	b2342	-1.46503	0.0980222		fadI	b2342	-0.243655	0.864148		fadI	b2342	1.52351	0.0923899			fadI	b2342
fadJ	b2341	-1.8968	0.020616		fadJ	b2341	-0.917179	0.385652		fadJ	b2341	-0.147501	0.909878			fadJ	b2341	-2.85469	0.000140428		fadJ	b2341	0.548389	0.626216		fadJ	b2341	2.20624	0.00840053			fadJ	b2341	-1.19261	0.172115		fadJ	b2341	-0.642921	0.576235		fadJ	b2341	1.15481	0.195766			fadJ	b2341
fadK	b1701	0.0830977	0.939799		fadK	b1701	-0.0420304	0.975088		fadK	b1701	0.0685265	0.951541			fadK	b1701	0.17895	0.849807		fadK	b1701	0.130061	0.914259		fadK	b1701	0.556686	0.560749			fadK	b1701	-0.271253	0.77616		fadK	b1701	1.23205	0.0974977		fadK	b1701	0.119434	0.908894			fadK	b1701
fadL	b2344	-0.986877	0.309219		fadL	b2344	-0.406129	0.742352		fadL	b2344	0.299488	0.799928			fadL	b2344	-1.26573	0.134334		fadL	b2344	0.902584	0.382439		fadL	b2344	2.65404	0.00140324			fadL	b2344	-0.308725	0.786629		fadL	b2344	-0.534448	0.665068		fadL	b2344	1.72647	0.0421565			fadL	b2344
fadM	b0443	-3.04963	0.000175403		fadM	b0443	-0.644046	0.577485		fadM	b0443	-0.520576	0.619267			fadM	b0443	-3.17943	3.12937e-05		fadM	b0443	1.05606	0.278509		fadM	b0443	1.71921	0.0482465			fadM	b0443	-2.97991	9.09064e-05		fadM	b0443	0.170029	0.902899		fadM	b0443	-0.330415	0.767066			fadM	b0443
fadR	b1187	-1.25032	0.0211417		fadR	b1187	0.0737196	0.933391		fadR	b1187	0.233169	0.745402			fadR	b1187	-1.57456	0.0014424		fadR	b1187	0.389592	0.58104		fadR	b1187	0.415456	0.543822			fadR	b1187	-1.78271	0.000282754		fadR	b1187	-0.0234653	0.978972		fadR	b1187	-0.0415793	0.961694			fadR	b1187
fau	b2912	-0.471096	0.563403		fau	b2912	-1.36041	0.0107069		fau	b2912	-0.386661	0.536682			fau	b2912	-0.347686	0.610653		fau	b2912	-1.54231	0.00319897		fau	b2912	0.254172	0.734289			fau	b2912	-0.537088	0.408365		fau	b2912	-2.27073	1.82604e-06		fau	b2912	-0.809174	0.162293			fau	b2912
fbaA	b2925	0.188112	0.718503		fbaA	b2925	0.150587	0.793859		fbaA	b2925	0.784808	0.048573			fbaA	b2925	0.842538	0.0236024		fbaA	b2925	-0.417939	0.382802		fbaA	b2925	0.521308	0.245797			fbaA	b2925	0.468402	0.284663		fbaA	b2925	-0.0283583	0.967892		fbaA	b2925	0.544998	0.197293			fbaA	b2925
fbaB	b2097	-0.652225	0.241496		fbaB	b2097	-0.03314	0.970823		fbaB	b2097	0.566105	0.321703			fbaB	b2097	-1.36845	0.00297293		fbaB	b2097	-1.49227	0.00305637		fbaB	b2097	-1.23468	0.0170598			fbaB	b2097	-0.862103	0.0947973		fbaB	b2097	-0.645254	0.294053		fbaB	b2097	0.263582	0.686071			fbaB	b2097
fbp	b4232	0.895423	0.0416424		fbp	b4232	0.595075	0.250835		fbp	b4232	0.972969	0.0248688			fbp	b4232	0.804471	0.0555665		fbp	b4232	-0.568183	0.271825		fbp	b4232	0.980722	0.0361175			fbp	b4232	0.917853	0.0312028		fbp	b4232	0.603381	0.241845		fbp	b4232	0.850926	0.0556515			fbp	b4232
fdhD	b3895	0.451427	0.51991		fdhD	b3895	-0.377978	0.625322		fdhD	b3895	-0.837774	0.129977			fdhD	b3895	0.202447	0.764475		fdhD	b3895	0.627308	0.31728		fdhD	b3895	0.887273	0.132364			fdhD	b3895	0.289377	0.671033		fdhD	b3895	0.29991	0.695165		fdhD	b3895	-0.417924	0.518616			fdhD	b3895
fdhE	b3891	0.303822	0.531486		fdhE	b3891	0.803257	0.0481682		fdhE	b3891	1.41438	7.05916e-05			fdhE	b3891	0.450903	0.258014		fdhE	b3891	-0.0880318	0.886943		fdhE	b3891	0.854897	0.0486839			fdhE	b3891	0.606766	0.121012		fdhE	b3891	0.154183	0.796268		fdhE	b3891	0.89856	0.0194277			fdhE	b3891
fdhF	b4079	0.925978	0.364302		fdhF	b4079	-1.7007	0.0759969		fdhF	b4079	-2.82405	0.000634092			fdhF	b4079	0.122689	0.920926		fdhF	b4079	-1.19116	0.239532		fdhF	b4079	-2.93097	0.000627468			fdhF	b4079	0.38623	0.745774		fdhF	b4079	-2.0432	0.0241659		fdhF	b4079	-3.5434	8.85809e-06			fdhF	b4079
fdnG	b1474	0.195468	0.886574		fdnG	b1474	-0.690089	0.583227		fdnG	b1474	-0.97552	0.343712			fdnG	b1474	-0.3005	0.796102		fdnG	b1474	2.23275	0.0154547		fdnG	b1474	1.37338	0.171327			fdnG	b1474	0.186563	0.888266		fdnG	b1474	-0.568503	0.665276		fdnG	b1474	-1.87587	0.0447092			fdnG	b1474
fdnH	b1475	0.676961	0.576194		fdnH	b1475	-0.113543	0.944463		fdnH	b1475	-0.32444	0.798208			fdnH	b1475	0.0930533	0.945466		fdnH	b1475	1.17576	0.278509		fdnH	b1475	1.29595	0.212485			fdnH	b1475	-0.196249	0.885691		fdnH	b1475	-0.010854	0.994181		fdnH	b1475	-1.44112	0.160594			fdnH	b1475
fdnI	b1476	0.272651	0.786507		fdnI	b1476	-0.0180282	0.989034		fdnI	b1476	-0.874229	0.205545			fdnI	b1476	-0.367935	0.660743		fdnI	b1476	0.828158	0.29288		fdnI	b1476	-0.641821	0.434089			fdnI	b1476	-0.634569	0.425404		fdnI	b1476	-0.906426	0.268738		fdnI	b1476	-1.7084	0.00815887			fdnI	b1476
fdoG	b3894	0.530864	0.468506		fdoG	b3894	1.59357	0.0109243		fdoG	b3894	2.40325	2.4421e-05			fdoG	b3894	-0.449034	0.512994		fdoG	b3894	0.323744	0.709102		fdoG	b3894	2.43869	2.65227e-05			fdoG	b3894	0.0430882	0.964303		fdoG	b3894	0.64411	0.415867		fdoG	b3894	1.36351	0.0251744			fdoG	b3894
fdoH	b3893	-0.452154	0.498294		fdoH	b3893	1.22834	0.033946		fdoH	b3893	1.95043	0.000158305			fdoH	b3893	-1.32996	0.00986206		fdoH	b3893	0.203332	0.805167		fdoH	b3893	1.6169	0.00338651			fdoH	b3893	-0.632733	0.304275		fdoH	b3893	0.182374	0.839537		fdoH	b3893	0.444302	0.507745			fdoH	b3893
fdoI	b3892	-0.56905	0.288018		fdoI	b3892	0.554388	0.339145		fdoI	b3892	1.05976	0.0232484			fdoI	b3892	-1.07234	0.0153166		fdoI	b3892	-0.0696454	0.932472		fdoI	b3892	0.63447	0.261565			fdoI	b3892	-0.755278	0.115511		fdoI	b3892	0.120306	0.875018		fdoI	b3892	0.441119	0.432399			fdoI	b3892
fdrA	b0518	-0.58736	0.797964		fdrA	b0518	0.564232	0.731287		fdrA	b0518	0.736879	0.496762			fdrA	b0518	0.225838	0.886046		fdrA	b0518	0.528881	0.729636		fdrA	b0518	-0.196049	NA			fdrA	b0518	0.617958	0.639769		fdrA	b0518	0.646483	0.660238		fdrA	b0518	-0.487129	0.719335			fdrA	b0518
fdx	b2525	0.580266	0.50003		fdx	b2525	0.199662	0.855545		fdx	b2525	0.483359	0.582336			fdx	b2525	1.79292	0.00492746		fdx	b2525	0.960856	0.231841		fdx	b2525	2.12159	0.0026309			fdx	b2525	0.909335	0.223978		fdx	b2525	0.00571614	0.995079		fdx	b2525	2.34704	0.00030994			fdx	b2525
feaB	b1385	-0.373372	0.560492		feaB	b1385	-0.640223	0.33848		feaB	b1385	0.640871	0.258515			feaB	b1385	-0.590981	0.263253		feaB	b1385	-0.211602	0.787409		feaB	b1385	0.296706	0.690751			feaB	b1385	-0.224316	0.737799		feaB	b1385	0.0191139	0.982376		feaB	b1385	0.258456	0.704986			feaB	b1385
feaR	b1384	1.055	0.120032		feaR	b1384	0.00855133	0.99411		feaR	b1384	-0.369008	0.632313			feaR	b1384	-0.00626457	0.995936		feaR	b1384	1.94625	0.000626585		feaR	b1384	0.604911	0.469068			feaR	b1384	1.50525	0.00545082		feaR	b1384	2.51287	1.43773e-06		feaR	b1384	2.30308	8.34889e-06			feaR	b1384
fecA	b4291	-0.0471656	0.949047		fecA	b4291	0.0248606	0.978245		fecA	b4291	0.427715	0.466907			fecA	b4291	0.580251	0.247051		fecA	b4291	-0.942579	0.0847115		fecA	b4291	0.407546	0.567807			fecA	b4291	-0.17808	0.784102		fecA	b4291	-0.929018	0.0762812		fecA	b4291	0.550481	0.338179			fecA	b4291
fecB	b4290	0.841216	0.231646		fecB	b4290	0.453589	0.594048		fecB	b4290	0.0586647	0.95259			fecB	b4290	0.475209	0.489377		fecB	b4290	-0.361123	0.682712		fecB	b4290	-0.114186	0.918607			fecB	b4290	0.06343	0.946595		fecB	b4290	-0.53004	0.523985		fecB	b4290	-0.544212	0.485622			fecB	b4290
fecC	b4289	0.778082	0.486837		fecC	b4289	1.3152	0.254427		fecC	b4289	0.412278	0.737725			fecC	b4289	0.964427	0.302194		fecC	b4289	0.697212	0.591411		fecC	b4289	1.4022	0.200358			fecC	b4289	0.483242	0.668259		fecC	b4289	0.584669	0.670665		fecC	b4289	0.233285	0.86492			fecC	b4289
fecD	b4288	-0.248914	0.839333		fecD	b4288	0.54721	0.60308		fecD	b4288	0.230211	0.81245			fecD	b4288	0.454631	0.585981		fecD	b4288	0.184703	0.879552		fecD	b4288	0.880923	0.336855			fecD	b4288	-0.424418	0.64143		fecD	b4288	-0.0399618	0.974956		fecD	b4288	0.299574	0.758888			fecD	b4288
fecE	b4287	1.07831	0.312115		fecE	b4287	-0.296386	0.840778		fecE	b4287	-0.757937	0.47026			fecE	b4287	0.394488	0.72599		fecE	b4287	-0.064883	0.969791		fecE	b4287	-0.139746	0.930792			fecE	b4287	0.569254	0.607198		fecE	b4287	-0.0920225	0.952638		fecE	b4287	-0.336424	0.781583			fecE	b4287
fecI	b4293	1.97297	5.00489e-07		fecI	b4293	-0.0904297	0.894955		fecI	b4293	0.0175657	0.981076			fecI	b4293	2.00562	8.325e-08		fecI	b4293	-1.29703	0.00324619		fecI	b4293	-0.340859	0.579059			fecI	b4293	1.62324	2.39215e-05		fecI	b4293	-1.30669	0.00147394		fecI	b4293	0.383096	0.449919			fecI	b4293
fecR	b4292	2.17697	3.8286e-05		fecR	b4292	0.2412	0.770112		fecR	b4292	-0.0298674	0.976686			fecR	b4292	2.54121	3.45337e-07		fecR	b4292	-1.32869	0.0344251		fecR	b4292	-0.350483	0.694486			fecR	b4292	2.06469	5.98407e-05		fecR	b4292	-1.08432	0.0803511		fecR	b4292	0.337102	0.651396			fecR	b4292
feoA	b3408	-2.53029	0.0172612		feoA	b3408	-1.97349	0.0720907		feoA	b3408	-1.3345	0.22443			feoA	b3408	-2.00067	0.0429198		feoA	b3408	-1.37099	0.235658		feoA	b3408	-0.381445	0.786151			feoA	b3408	-2.94613	0.0021858		feoA	b3408	-3.22868	0.000992187		feoA	b3408	-2.19436	0.0299584			feoA	b3408
feoB	b3409	-1.69636	0.0669556		feoB	b3409	-2.71948	0.00239366		feoB	b3409	-1.88665	0.037699			feoB	b3409	-1.42094	0.112445		feoB	b3409	-2.49507	0.00647556		feoB	b3409	-1.13077	0.276729			feoB	b3409	-2.01573	0.0227345		feoB	b3409	-4.13202	8.17854e-07		feoB	b3409	-3.15029	0.000157715			feoB	b3409
feoC	b3410	-0.654173	0.550827		feoC	b3410	-3.39268	1.78819e-05		feoC	b3410	-1.77029	0.0133662			feoC	b3410	0.639624	0.442286		feoC	b3410	-1.95873	0.00995475		feoC	b3410	-1.38031	0.117305			feoC	b3410	-0.189179	0.857475		feoC	b3410	-3.4978	6.69784e-07		feoC	b3410	-2.50906	0.00063142			feoC	b3410
fepA	b0584	0.715846	0.258279		fepA	b0584	0.372922	0.638255		fepA	b0584	1.38432	0.0135777			fepA	b0584	1.52854	0.00325238		fepA	b0584	-0.99884	0.114577		fepA	b0584	0.464141	0.518984			fepA	b0584	1.06281	0.0627549		fepA	b0584	0.176571	0.850006		fepA	b0584	2.26257	1.18109e-05			fepA	b0584
fepB	b0592	1.50005	0.000537112		fepB	b0592	0.856188	0.0931814		fepB	b0592	1.31527	0.00350951			fepB	b0592	1.95432	1.37673e-06		fepB	b0592	-0.613167	0.271825		fepB	b0592	0.564079	0.345532			fepB	b0592	1.54555	0.0002407		fepB	b0592	0.300387	0.649336		fepB	b0592	1.52595	0.000502525			fepB	b0592
fepC	b0588	1.57802	0.0716693		fepC	b0588	0.846814	0.460879		fepC	b0588	3.05088	0.0021312			fepC	b0588	1.83019	0.0202922		fepC	b0588	-1.24607	0.273144		fepC	b0588	1.05981	0.52746			fepC	b0588	2.02556	0.0106138		fepC	b0588	0.0982534	0.949595		fepC	b0588	2.06006	0.0623705			fepC	b0588
fepD	b0590	-0.0894232	0.889818		fepD	b0590	0.120576	0.847787		fepD	b0590	0.94233	0.0183948			fepD	b0590	0.328832	0.460458		fepD	b0590	-1.35375	0.00140784		fepD	b0590	0.255861	0.691393			fepD	b0590	-0.141892	0.789876		fepD	b0590	-0.785187	0.0689444		fepD	b0590	0.304933	0.562737			fepD	b0590
fepE	b0587	1.69702	0.20964		fepE	b0587	0.275821	0.907234		fepE	b0587	0.778383	0.639359			fepE	b0587	0.870289	0.529882		fepE	b0587	-0.222781	0.92299		fepE	b0587	0.1643	NA			fepE	b0587	-0.557569	0.744195		fepE	b0587	-0.783908	0.708114		fepE	b0587	-0.191986	0.930317			fepE	b0587
fepG	b0589	-0.164729	0.863813		fepG	b0589	0.506	0.562812		fepG	b0589	1.04668	0.151586			fepG	b0589	0.312453	0.674288		fepG	b0589	-1.17188	0.129407		fepG	b0589	0.267414	0.833311			fepG	b0589	0.264137	0.748495		fepG	b0589	-0.245487	0.809537		fepG	b0589	1.01001	0.185532			fepG	b0589
fes	b0585	0.0427677	0.956995		fes	b0585	-0.890884	0.200381		fes	b0585	0.398859	0.591749			fes	b0585	0.876136	0.123316		fes	b0585	-1.46286	0.0188864		fes	b0585	-0.587267	0.490755			fes	b0585	0.529978	0.431519		fes	b0585	-0.0774509	0.938101		fes	b0585	1.84301	0.000891265			fes	b0585
fetA	b0490	-0.0554389	0.959932		fetA	b0490	0.390235	0.688371		fetA	b0490	0.258306	0.776415			fetA	b0490	-0.429752	0.628343		fetA	b0490	0.282615	0.776623		fetA	b0490	0.0596545	0.970306			fetA	b0490	-0.121348	0.901356		fetA	b0490	0.321289	0.744953		fetA	b0490	0.415696	0.632097			fetA	b0490
fetB	b0491	0.562928	0.486837		fetB	b0491	0.346206	0.690521		fetB	b0491	-0.235765	0.755389			fetB	b0491	-0.484371	0.531807		fetB	b0491	0.591074	0.418867		fetB	b0491	-0.871362	0.304686			fetB	b0491	-0.348539	0.655632		fetB	b0491	0.601153	0.40423		fetB	b0491	-0.0262865	0.975234			fetB	b0491
ffh	b2610	0.655327	0.128857		ffh	b2610	0.17076	0.772912		ffh	b2610	0.282795	0.571073			ffh	b2610	1.16303	0.0017015		ffh	b2610	-0.476705	0.325234		ffh	b2610	-0.0164508	0.983396			ffh	b2610	0.440774	0.339002		ffh	b2610	-0.979123	0.0187816		ffh	b2610	-0.177549	0.743108			ffh	b2610
ffs	b0455	-1.55116	0.31004		ffs	b0455	-0.653014	0.735862		ffs	b0455	-6.32313	2.44562e-07			ffs	b0455	-4.06309	0.000923399		ffs	b0455	-3.23522	0.0198197		ffs	b0455	-2.76373	0.0502906			ffs	b0455	-1.86553	0.196386		ffs	b0455	-2.78913	0.0523072		ffs	b0455	-2.33319	0.0922767			ffs	b0455
fhlA	b2731	0.0436845	0.946023		fhlA	b2731	0.136624	0.847787		fhlA	b2731	-0.812138	0.0716938			fhlA	b2731	-0.499052	0.296237		fhlA	b2731	-0.217478	0.745971		fhlA	b2731	-0.774106	0.152314			fhlA	b2731	-0.191095	0.745963		fhlA	b2731	-0.0175308	0.981322		fhlA	b2731	-1.0891	0.014373			fhlA	b2731
fhuA	b0150	-0.0918027	0.839862		fhuA	b0150	-0.235637	0.580198		fhuA	b0150	-0.279561	0.450728			fhuA	b0150	-0.122607	0.749813		fhuA	b0150	-0.933758	0.00323147		fhuA	b0150	-0.70013	0.0427335			fhuA	b0150	-0.281842	0.447248		fhuA	b0150	-0.498674	0.159935		fhuA	b0150	0.121602	0.774538			fhuA	b0150
fhuB	b0153	0.630863	0.226647		fhuB	b0153	-0.510916	0.401288		fhuB	b0153	0.387233	0.509937			fhuB	b0153	0.54582	0.259108		fhuB	b0153	-0.754333	0.169232		fhuB	b0153	0.213722	0.774303			fhuB	b0153	0.62997	0.204239		fhuB	b0153	-0.540197	0.356241		fhuB	b0153	0.725771	0.167428			fhuB	b0153
fhuC	b0151	1.32401	0.00213494		fhuC	b0151	-0.936068	0.0714413		fhuC	b0151	0.0761906	0.916002			fhuC	b0151	1.95379	5.40628e-07		fhuC	b0151	-0.565726	0.30204		fhuC	b0151	-0.165708	0.840591			fhuC	b0151	1.55131	0.000121816		fhuC	b0151	-0.436254	0.452745		fhuC	b0151	0.944675	0.0454705			fhuC	b0151
fhuD	b0152	0.372953	0.588636		fhuD	b0152	0.0782351	0.927896		fhuD	b0152	0.765074	0.212803			fhuD	b0152	0.736894	0.155567		fhuD	b0152	-0.323449	0.652958		fhuD	b0152	1.14739	0.0969945			fhuD	b0152	0.561707	0.323074		fhuD	b0152	-0.145707	0.85956		fhuD	b0152	1.44111	0.00877642			fhuD	b0152
fhuE	b1102	0.109635	0.87338		fhuE	b1102	0.449777	0.462835		fhuE	b1102	1.11995	0.0169711			fhuE	b1102	0.321073	0.540165		fhuE	b1102	-0.0906683	0.908642		fhuE	b1102	0.380051	0.551262			fhuE	b1102	0.195497	0.753341		fhuE	b1102	0.966962	0.0529437		fhuE	b1102	1.48362	0.000897428			fhuE	b1102
fhuF	b4367	2.05095	8.07915e-07		fhuF	b4367	1.77429	5.0047e-05		fhuF	b4367	1.26909	0.00459416			fhuF	b4367	2.1823	6.21077e-08		fhuF	b4367	0.770662	0.13816		fhuF	b4367	0.556388	0.311448			fhuF	b4367	1.74159	3.23973e-05		fhuF	b4367	1.21057	0.00960393		fhuF	b4367	1.19709	0.00767898			fhuF	b4367
fic	b3361	-2.12129	5.159e-05		fic	b3361	-1.44051	0.0142416		fic	b3361	-1.45138	0.00840182			fic	b3361	-1.89293	0.000194239		fic	b3361	-0.14396	0.874091		fic	b3361	-0.530335	0.446063			fic	b3361	-1.56826	0.00296583		fic	b3361	-0.128413	0.889837		fic	b3361	-0.521979	0.428711			fic	b3361
fieF	b3915	-1.06195	0.0447127		fieF	b3915	-0.348644	0.612478		fieF	b3915	-0.489899	0.392074			fieF	b3915	-1.78095	0.000150602		fieF	b3915	0.123903	0.875987		fieF	b3915	-0.233806	0.732089			fieF	b3915	-1.31621	0.00580163		fieF	b3915	-0.143678	0.859054		fieF	b3915	-0.234889	0.717582			fieF	b3915
fimA	b4314	1.42816	0.0153087		fimA	b4314	0.900435	0.222792		fimA	b4314	1.43397	0.0262019			fimA	b4314	0.724597	0.245884		fimA	b4314	-0.139476	0.892898		fimA	b4314	1.12916	0.148012			fimA	b4314	1.41379	0.015026		fimA	b4314	-0.370941	0.688933		fimA	b4314	1.6902	0.00760247			fimA	b4314
fimB	b4312	-0.140109	0.951601		fimB	b4312	-3.79281	0.126091		fimB	b4312	1.18184	NA			fimB	b4312	-0.837097	0.663931		fimB	b4312	-0.919014	0.644501		fimB	b4312	3.80597	NA			fimB	b4312	-2.42873	0.19208		fimB	b4312	0.757101	NA		fimB	b4312	2.19663	NA			fimB	b4312
fimC	b4316	2.68898	0.121267		fimC	b4316	2.66518	0.201459		fimC	b4316	1.09437	NA			fimC	b4316	2.31524	0.146267		fimC	b4316	1.66105	0.462475		fimC	b4316	1.06827	NA			fimC	b4316	2.25432	0.160815		fimC	b4316	1.59157	0.496359		fimC	b4316	0.331248	0.889746			fimC	b4316
fimD	b4317	1.16689	0.397233		fimD	b4317	0.322477	0.86808		fimD	b4317	0.418838	0.783485			fimD	b4317	0.353464	0.810815		fimD	b4317	1.03819	0.477766		fimD	b4317	0.938797	0.525174			fimD	b4317	0.744547	0.591331		fimD	b4317	0.481012	0.787913		fimD	b4317	0.347992	0.824737			fimD	b4317
fimE	b4313	-0.258612	0.916947		fimE	b4313	-0.554753	0.742352		fimE	b4313	-0.918283	0.476787			fimE	b4313	-1.9828	0.349264		fimE	b4313	1.10123	0.369577		fimE	b4313	1.16764	0.372108			fimE	b4313	-0.0586939	0.977865		fimE	b4313	-0.82882	0.572348		fimE	b4313	0.155378	0.92016			fimE	b4313
fimF	b4318	0.759735	0.751331		fimF	b4318	-1.35751	0.587962		fimF	b4318	-0.473536	NA			fimF	b4318	-0.446728	0.852567		fimF	b4318	-0.948111	0.657754		fimF	b4318	0.129439	NA			fimF	b4318	-0.166593	0.946399		fimF	b4318	0.0694145	NA		fimF	b4318	-1.10143	NA			fimF	b4318
fimG	b4319	0.840685	0.715279		fimG	b4319	-0.0443875	0.988096		fimG	b4319	0.744952	0.532331			fimG	b4319	2.53366	0.0403486		fimG	b4319	1.87128	0.134508		fimG	b4319	0.894171	NA			fimG	b4319	1.7877	0.184579		fimG	b4319	1.44701	0.280577		fimG	b4319	0.225995	0.884329			fimG	b4319
fimH	b4320	-0.534696	0.667377		fimH	b4320	-0.173128	0.899817		fimH	b4320	-1.35824	0.0957674			fimH	b4320	-1.16212	0.228248		fimH	b4320	-0.193647	0.883547		fimH	b4320	-0.775081	0.462469			fimH	b4320	-0.712662	0.474037		fimH	b4320	0.0123629	0.992749		fimH	b4320	-1.3554	0.109888			fimH	b4320
fimI	b4315	1.40382	0.349663		fimI	b4315	2.56316	0.0838548		fimI	b4315	3.93601	0.0113901			fimI	b4315	1.30491	0.308505		fimI	b4315	2.96679	0.0295046		fimI	b4315	1.02408	0.743971			fimI	b4315	1.90534	0.0952739		fimI	b4315	2.40078	0.0910792		fimI	b4315	3.92951	0.0120015			fimI	b4315
fis	b3261	-0.883747	0.455832		fis	b3261	-1.53163	0.177246		fis	b3261	-1.0674	0.335559			fis	b3261	-1.30423	0.19755		fis	b3261	1.14329	0.319549		fis	b3261	0.0279544	0.988231			fis	b3261	-1.2922	0.224393		fis	b3261	-1.96838	0.061011		fis	b3261	-0.826284	0.47326			fis	b3261
fiu	b0805	0.634859	0.307065		fiu	b0805	0.299302	0.710562		fiu	b0805	0.727085	0.248777			fiu	b0805	0.793166	0.145096		fiu	b0805	-1.09505	0.0825626		fiu	b0805	0.0627364	0.951406			fiu	b0805	1.30663	0.0129967		fiu	b0805	-0.280411	0.745422		fiu	b0805	1.06545	0.0677849			fiu	b0805
fixA	b0041	1.69106	0.469171		fixA	b0041	1.9625	0.585874		fixA	b0041	-4.70147	NA			fixA	b0041	1.0068	0.660743		fixA	b0041	3.33942	0.233238		fixA	b0041	-0.851407	NA			fixA	b0041	1.38464	0.526238		fixA	b0041	2.56766	NA		fixA	b0041	-0.433563	NA			fixA	b0041
fixB	b0042	-0.0811907	0.967208		fixB	b0042	-0.21669	0.930664		fixB	b0042	-0.220068	NA			fixB	b0042	0.665416	0.671046		fixB	b0042	0.368236	0.866606		fixB	b0042	-2.98506	NA			fixB	b0042	0.448957	0.790098		fixB	b0042	0.734642	0.706469		fixB	b0042	-1.24502	0.494965			fixB	b0042
fixC	b0043	0.701243	0.702667		fixC	b0043	0.908342	0.641958		fixC	b0043	-0.14231	0.944634			fixC	b0043	-0.357338	0.846992		fixC	b0043	1.18298	0.477766		fixC	b0043	0.830781	0.654056			fixC	b0043	1.25485	0.349781		fixC	b0043	0.60059	0.770333		fixC	b0043	-0.245579	0.899469			fixC	b0043
fixX	b0044	1.15928	NA		fixX	b0044	-0.172421	NA		fixX	b0044	-1.44048	NA			fixX	b0044	-1.55653	NA		fixX	b0044	-2.07197	NA		fixX	b0044	-0.502326	NA			fixX	b0044	-0.752022	NA		fixX	b0044	-0.387249	NA		fixX	b0044	-0.168744	NA			fixX	b0044
fklB	b4207	0.142771	0.827622		fklB	b4207	-0.590258	0.292432		fklB	b4207	0.559529	0.278603			fklB	b4207	0.749138	0.0936471		fklB	b4207	-0.335283	0.579872		fklB	b4207	0.680985	0.199558			fklB	b4207	0.397195	0.465171		fklB	b4207	0.356271	0.572348		fklB	b4207	1.09901	0.0143637			fklB	b4207
fkpA	b3347	0.400929	0.536388		fkpA	b3347	0.324942	0.666636		fkpA	b3347	0.122291	0.874204			fkpA	b3347	0.984897	0.0535243		fkpA	b3347	-0.0196692	0.984568		fkpA	b3347	-0.45355	0.488305			fkpA	b3347	0.308983	0.647401		fkpA	b3347	-0.76459	0.221937		fkpA	b3347	-0.129291	0.864754			fkpA	b3347
fkpB	b0028	0.900686	0.0993335		fkpB	b0028	0.134738	0.871176		fkpB	b0028	-0.293314	0.651798			fkpB	b0028	1.49495	0.00136609		fkpB	b0028	1.19644	0.0246774		fkpB	b0028	0.0926068	0.909612			fkpB	b0028	1.16066	0.0195878		fkpB	b0028	0.10427	0.902939		fkpB	b0028	-0.0921684	0.902468			fkpB	b0028
flc		-1.60555	0.0545065		flc		-2.43399	0.00380153		flc		-2.06291	0.00164589			flc		-1.82022	0.0116825		flc		-1.00373	0.227661		flc		-1.4066	0.0856119			flc		-1.51288	0.0286671		flc		-1.28371	0.0938545		flc		-1.53585	0.0264842			flc
fldA	b0684	0.621129	0.254919		fldA	b0684	0.190223	0.786071		fldA	b0684	0.448068	0.426009			fldA	b0684	1.11842	0.012587		fldA	b0684	0.742671	0.168232		fldA	b0684	0.638859	0.261565			fldA	b0684	1.05172	0.0240729		fldA	b0684	0.538567	0.363464		fldA	b0684	1.31448	0.00418664			fldA	b0684
fldB	b2895	0.0800943	0.90827		fldB	b2895	-0.76822	0.133047		fldB	b2895	0.0365655	0.958591			fldB	b2895	0.104466	0.859464		fldB	b2895	-0.531049	0.317262		fldB	b2895	-0.00401328	0.995903			fldB	b2895	-0.115502	0.852598		fldB	b2895	-0.528242	0.331346		fldB	b2895	0.0365292	0.95934			fldB	b2895
flgA	b1072	0.267627	0.830766		flgA	b1072	-1.3099	0.273439		flgA	b1072	-0.346354	0.755389			flgA	b1072	0.000475061	0.999664		flgA	b1072	-0.328012	0.794968		flgA	b1072	-0.0550977	0.975733			flgA	b1072	0.784327	0.378228		flgA	b1072	0.243362	0.85241		flgA	b1072	0.451323	0.669194			flgA	b1072
flgB	b1073	1.39406	0.453082		flgB	b1073	3.1857	0.237794		flgB	b1073	1.25537	0.589277			flgB	b1073	2.67921	0.0428123		flgB	b1073	2.97314	0.250878		flgB	b1073	1.94731	NA			flgB	b1073	3.60515	0.00402578		flgB	b1073	0.59736	0.884542		flgB	b1073	1.57346	0.494102			flgB	b1073
flgC	b1074	-0.670234	0.761651		flgC	b1074	-0.881898	0.756912		flgC	b1074	-0.783469	0.750869			flgC	b1074	0.422037	0.816018		flgC	b1074	-0.399602	0.885112		flgC	b1074	-0.434172	NA			flgC	b1074	1.0863	0.524963		flgC	b1074	-0.4584	0.864837		flgC	b1074	0.737812	0.750504			flgC	b1074
flgD	b1075	-0.0690903	0.957552		flgD	b1075	-0.552029	0.744844		flgD	b1075	0.492765	0.68123			flgD	b1075	1.58386	0.053208		flgD	b1075	0.345752	0.820003		flgD	b1075	0.193694	0.913126			flgD	b1075	1.77411	0.0301665		flgD	b1075	0.244789	0.876272		flgD	b1075	0.423797	0.741918			flgD	b1075
flgE	b1076	0.537966	0.50759		flgE	b1076	-0.209177	0.858055		flgE	b1076	0.722349	0.332921			flgE	b1076	1.01233	0.0931892		flgE	b1076	0.268029	0.790568		flgE	b1076	1.46846	0.0534124			flgE	b1076	1.82893	0.000749753		flgE	b1076	0.652012	0.430799		flgE	b1076	0.252057	0.791617			flgE	b1076
flgF	b1077	-0.435401	0.73514		flgF	b1077	0.311092	0.834314		flgF	b1077	-0.770314	0.49191			flgF	b1077	1.90643	0.0106345		flgF	b1077	0.305608	0.829038		flgF	b1077	0.399013	0.785046			flgF	b1077	2.44316	0.000769046		flgF	b1077	0.582099	0.644136		flgF	b1077	0.454134	0.70251			flgF	b1077
flgG	b1078	-0.0805879	0.949047		flgG	b1078	0.992339	0.349578		flgG	b1078	0.999547	0.279189			flgG	b1078	1.0198	0.190943		flgG	b1078	0.514855	0.65869		flgG	b1078	1.30425	0.220888			flgG	b1078	1.27391	0.0912112		flgG	b1078	0.545545	0.644136		flgG	b1078	0.586319	0.592982			flgG	b1078
flgH	b1079	0.508808	0.75913		flgH	b1079	0.369755	0.838118		flgH	b1079	0.0233546	0.98954			flgH	b1079	2.15537	0.0227232		flgH	b1079	0.502254	0.755258		flgH	b1079	-0.163209	0.940491			flgH	b1079	2.25077	0.0166075		flgH	b1079	-0.0349059	0.984298		flgH	b1079	0.283278	0.845984			flgH	b1079
flgI	b1080	-0.477342	0.737474		flgI	b1080	1.35812	0.209564		flgI	b1080	0.378374	0.736094			flgI	b1080	1.15534	0.155605		flgI	b1080	1.23813	0.233238		flgI	b1080	0.921331	0.431678			flgI	b1080	2.23423	0.00157939		flgI	b1080	1.41763	0.144481		flgI	b1080	0.320628	0.788182			flgI	b1080
flgJ	b1081	0.217966	0.896456		flgJ	b1081	0.833992	0.557132		flgJ	b1081	-0.00508434	0.997032			flgJ	b1081	0.210216	0.878696		flgJ	b1081	1.2121	0.312623		flgJ	b1081	0.736139	0.599692			flgJ	b1081	1.30351	0.200828		flgJ	b1081	0.914561	0.483856		flgJ	b1081	0.343493	0.803824			flgJ	b1081
flgK	b1082	0.268054	0.720011		flgK	b1082	-0.25793	0.762263		flgK	b1082	-0.193672	0.780608			flgK	b1082	0.868695	0.0822145		flgK	b1082	0.254849	0.751942		flgK	b1082	0.277333	0.713257			flgK	b1082	1.10061	0.022076		flgK	b1082	0.589433	0.362995		flgK	b1082	-0.211427	0.762022			flgK	b1082
flgL	b1083	-0.594184	0.482856		flgL	b1083	-0.541695	0.528497		flgL	b1083	-1.02872	0.107056			flgL	b1083	-0.366368	0.628275		flgL	b1083	-0.227588	0.810482		flgL	b1083	-1.13788	0.137928			flgL	b1083	-0.413154	0.597103		flgL	b1083	-0.293761	0.760646		flgL	b1083	-0.984989	0.138275			flgL	b1083
flgM	b1071	1.08959	0.152388		flgM	b1071	2.47254	0.000181275		flgM	b1071	2.4109	0.000409114			flgM	b1071	0.984427	0.14585		flgM	b1071	1.21913	0.12563		flgM	b1071	1.17551	0.253015			flgM	b1071	0.750648	0.304515		flgM	b1071	1.69984	0.0142899		flgM	b1071	2.34456	0.00072252			flgM	b1071
flgN	b1070	1.14977	0.175546		flgN	b1070	2.25654	0.00243509		flgN	b1070	1.98175	0.00334659			flgN	b1070	2.32889	0.000153233		flgN	b1070	2.32761	0.00146003		flgN	b1070	1.06058	0.289951			flgN	b1070	1.72191	0.00754458		flgN	b1070	2.06174	0.00397777		flgN	b1070	1.36548	0.0709042			flgN	b1070
flhA	b1879	-0.17781	0.868992		flhA	b1879	-0.868504	0.360188		flhA	b1879	-0.673145	0.376459			flhA	b1879	0.462919	0.542269		flhA	b1879	0.162022	0.883547		flhA	b1879	0.0715256	0.952393			flhA	b1879	0.372299	0.655632		flhA	b1879	0.407703	0.672584		flhA	b1879	-0.443188	0.60308			flhA	b1879
flhB	b1880	-0.257257	0.902081		flhB	b1880	-0.561298	0.731287		flhB	b1880	-0.315809	0.810043			flhB	b1880	1.37947	0.205553		flhB	b1880	-0.413258	0.790455		flhB	b1880	0.316878	0.837424			flhB	b1880	1.39039	0.201715		flhB	b1880	-0.654455	0.653662		flhB	b1880	-0.922661	0.443017			flhB	b1880
flhC	b1891	1.04424	0.397233		flhC	b1891	0.103657	0.950253		flhC	b1891	0.903625	0.424948			flhC	b1891	0.61691	0.602419		flhC	b1891	-0.54515	0.688161		flhC	b1891	0.812685	0.55312			flhC	b1891	0.85867	0.457001		flhC	b1891	-0.691919	0.602926		flhC	b1891	2.08047	0.0290809			flhC	b1891
flhD	b1892	2.00782	0.0515218		flhD	b1892	0.41582	0.779976		flhD	b1892	1.09387	0.33293			flhD	b1892	2.44639	0.00716864		flhD	b1892	0.181791	0.914259		flhD	b1892	0.218019	0.907262			flhD	b1892	1.63271	0.104367		flhD	b1892	-0.285238	0.85956		flhD	b1892	2.38239	0.0130711			flhD	b1892
flhE	b1878	1.61512	0.405707		flhE	b1878	1.75933	0.31707		flhE	b1878	-0.879322	NA			flhE	b1878	2.63362	0.0593696		flhE	b1878	1.65714	0.317611		flhE	b1878	0.448367	NA			flhE	b1878	1.86943	0.224999		flhE	b1878	0.704155	0.745819		flhE	b1878	-0.432583	0.828343			flhE	b1878
fliA	b1922	-0.645332	0.573303		fliA	b1922	-0.281532	0.866958		fliA	b1922	0.408865	0.682316			fliA	b1922	0.706031	0.35626		fliA	b1922	0.82055	0.441697		fliA	b1922	-0.0476022	0.98119			fliA	b1922	1.33254	0.0461586		fliA	b1922	1.08653	0.267621		fliA	b1922	-0.726608	0.509715			fliA	b1922
fliC	b1923	-0.368768	0.527387		fliC	b1923	-0.113286	0.880374		fliC	b1923	-1.31841	0.00278645			fliC	b1923	-0.685528	0.146867		fliC	b1923	0.26266	0.682712		fliC	b1923	-1.5952	0.000492403			fliC	b1923	-0.281666	0.632525		fliC	b1923	-0.442714	0.467269		fliC	b1923	-2.00106	1.90072e-06			fliC	b1923
fliD	b1924	1.21982	0.270734		fliD	b1924	0.449587	0.726991		fliD	b1924	1.26514	0.170975			fliD	b1924	0.237589	0.853332		fliD	b1924	1.00943	0.332307		fliD	b1924	1.11283	0.312344			fliD	b1924	1.60297	0.0762265		fliD	b1924	0.95688	0.366502		fliD	b1924	0.816146	0.435299			fliD	b1924
fliE	b1937	0.692885	0.720011		fliE	b1937	1.12736	0.526757		fliE	b1937	0.990763	NA			fliE	b1937	1.0075	0.472174		fliE	b1937	0.768328	0.667404		fliE	b1937	-0.362383	NA			fliE	b1937	0.21304	0.905409		fliE	b1937	0.0121676	0.994951		fliE	b1937	1.68296	0.240636			fliE	b1937
fliF	b1938	0.564144	0.644016		fliF	b1938	0.963805	0.469825		fliF	b1938	0.235415	0.8547			fliF	b1938	2.07607	0.00563794		fliF	b1938	0.445995	0.764961		fliF	b1938	-0.540402	0.767791			fliF	b1938	1.95063	0.0100979		fliF	b1938	0.762646	0.5588		fliF	b1938	0.515959	0.662841			fliF	b1938
fliG	b1939	0.0953445	0.948296		fliG	b1939	1.98531	0.0439188		fliG	b1939	-0.170363	0.89321			fliG	b1939	1.80823	0.02417		fliG	b1939	0.732308	0.559096		fliG	b1939	0.652942	0.579413			fliG	b1939	2.27691	0.00296583		fliG	b1939	1.42128	0.166413		fliG	b1939	0.516392	0.631439			fliG	b1939
fliH	b1940	1.05405	0.208706		fliH	b1940	1.00083	0.316034		fliH	b1940	0.218032	0.837481			fliH	b1940	0.272134	0.770838		fliH	b1940	0.424148	0.713293		fliH	b1940	0.362771	0.751113			fliH	b1940	0.726477	0.378525		fliH	b1940	0.784268	0.430572		fliH	b1940	0.26714	0.794857			fliH	b1940
fliI	b1941	0.709134	0.542006		fliI	b1941	0.373035	0.775015		fliI	b1941	-0.634349	0.520895			fliI	b1941	1.30672	0.114926		fliI	b1941	0.293685	0.820918		fliI	b1941	-0.260471	0.863665			fliI	b1941	1.66625	0.0325922		fliI	b1941	-0.043414	0.975411		fliI	b1941	-0.35897	0.752435			fliI	b1941
fliJ	b1942	0.707503	0.758311		fliJ	b1942	-2.05547	0.514803		fliJ	b1942	-0.576246	NA			fliJ	b1942	0.916634	0.598798		fliJ	b1942	1.50672	0.483701		fliJ	b1942	1.00905	NA			fliJ	b1942	1.84604	0.215268		fliJ	b1942	-0.00051021	NA		fliJ	b1942	0.191048	NA			fliJ	b1942
fliK	b1943	1.97881	0.0601757		fliK	b1943	0.673731	0.577575		fliK	b1943	-0.956828	0.287113			fliK	b1943	0.512489	0.698764		fliK	b1943	1.02945	0.310596		fliK	b1943	-0.491628	0.695535			fliK	b1943	1.91731	0.0387735		fliK	b1943	0.734184	0.511336		fliK	b1943	-1.47821	0.106594			fliK	b1943
fliL	b1944	0.251933	0.89709		fliL	b1944	0.0856622	0.973302		fliL	b1944	0.334105	0.846768			fliL	b1944	0.540627	0.704532		fliL	b1944	0.847833	0.611004		fliL	b1944	1.25393	NA			fliL	b1944	1.46798	0.209703		fliL	b1944	0.574462	0.760646		fliL	b1944	-3.05105	0.127018			fliL	b1944
fliM	b1945	0.0970166	0.932028		fliM	b1945	0.776982	0.442987		fliM	b1945	-0.158693	0.882014			fliM	b1945	-0.0790426	0.943378		fliM	b1945	1.01503	0.262368		fliM	b1945	0.86762	0.329826			fliM	b1945	0.436224	0.637233		fliM	b1945	1.31861	0.112896		fliM	b1945	-0.198541	0.850617			fliM	b1945
fliN	b1946	-0.524854	0.842885		fliN	b1946	-0.648447	0.816048		fliN	b1946	1.67926	NA			fliN	b1946	0.846599	0.602636		fliN	b1946	-0.875559	0.702934		fliN	b1946	2.64107	NA			fliN	b1946	1.11895	0.479788		fliN	b1946	-0.64908	NA		fliN	b1946	-0.0391809	NA			fliN	b1946
fliO	b1947	1.55486	0.53919		fliO	b1947	-3.48942	0.234127		fliO	b1947	2.16192	NA			fliO	b1947	1.06842	0.652519		fliO	b1947	-2.72147	0.270595		fliO	b1947	2.08629	NA			fliO	b1947	1.86232	0.386921		fliO	b1947	-1.83196	NA		fliO	b1947	1.99274	NA			fliO	b1947
fliP	b1948	1.08214	0.576194		fliP	b1948	1.85951	0.274364		fliP	b1948	-0.387682	0.859371			fliP	b1948	1.37657	0.370375		fliP	b1948	0.685004	0.750676		fliP	b1948	-2.27236	NA			fliP	b1948	1.16465	0.485113		fliP	b1948	0.0563094	0.981655		fliP	b1948	-0.114114	0.96421			fliP	b1948
fliQ	b1949	-1.01414	0.793973		fliQ	b1949	1.61431	0.594149		fliQ	b1949	2.55605	NA			fliQ	b1949	2.012	0.400236		fliQ	b1949	1.55158	0.595888		fliQ	b1949	3.05953	NA			fliQ	b1949	0.670528	0.829811		fliQ	b1949	1.45779	NA		fliQ	b1949	0.936629	NA			fliQ	b1949
fliR	b1950	1.86187	0.153662		fliR	b1950	-1.4347	0.503721		fliR	b1950	0.699635	0.593229			fliR	b1950	1.94818	0.0780381		fliR	b1950	1.2175	0.345116		fliR	b1950	1.81512	0.151988			fliR	b1950	1.97799	0.0698363		fliR	b1950	0.89793	0.524408		fliR	b1950	-0.0351459	0.983668			fliR	b1950
fliS	b1925	2.15691	0.259056		fliS	b1925	2.18745	0.33848		fliS	b1925	-0.395798	NA			fliS	b1925	1.33208	0.480097		fliS	b1925	1.57742	0.505793		fliS	b1925	-0.209182	NA			fliS	b1925	1.05747	0.609721		fliS	b1925	0.607644	0.843601		fliS	b1925	-0.716318	0.758888			fliS	b1925
fliT	b1926	-1.64677	0.50276		fliT	b1926	-0.0751646	0.980658		fliT	b1926	-0.00415316	NA			fliT	b1926	-1.33888	0.475503		fliT	b1926	1.35104	0.43672		fliT	b1926	-0.0677423	NA			fliT	b1926	-0.0194428	0.993922		fliT	b1926	-0.650133	NA		fliT	b1926	-0.0400304	NA			fliT	b1926
fliY	b1920	-1.48053	0.0518224		fliY	b1920	-0.447252	0.680828		fliY	b1920	-0.484807	0.611197			fliY	b1920	-1.72504	0.0145503		fliY	b1920	-0.623935	0.519758		fliY	b1920	-0.665501	0.483694			fliY	b1920	-0.686957	0.439832		fliY	b1920	0.797256	0.408661		fliY	b1920	0.616398	0.495078			fliY	b1920
fliZ	b1921	0.356258	0.758311		fliZ	b1921	0.566687	0.606787		fliZ	b1921	0.180919	0.868231			fliZ	b1921	0.32278	0.731012		fliZ	b1921	0.299406	0.794962		fliZ	b1921	-1.57139	0.357714			fliZ	b1921	1.07937	0.133796		fliZ	b1921	0.903473	0.30762		fliZ	b1921	0.698417	0.436932			fliZ	b1921
flk	b2321	1.22595	0.0738472		flk	b2321	0.815306	0.300122		flk	b2321	0.389117	0.633222			flk	b2321	0.913151	0.16854		flk	b2321	0.946077	0.198455		flk	b2321	1.16894	0.106247			flk	b2321	0.952962	0.160947		flk	b2321	0.464286	0.604148		flk	b2321	0.85343	0.225091			flk	b2321
flu	b2000	0.522826	0.364302		flu	b2000	0.420907	0.515424		flu	b2000	0.162086	0.810423			flu	b2000	1.21477	0.00716864		flu	b2000	-0.00567484	0.996815		flu	b2000	0.102162	0.897125			flu	b2000	0.434546	0.451202		flu	b2000	0.201131	0.793807		flu	b2000	-0.546364	0.332897			flu	b2000
flxA	b1566	-1.51058	0.485519		flxA	b1566	0.529833	0.835099		flxA	b1566	-0.194003	NA			flxA	b1566	-2.50419	0.182064		flxA	b1566	-1.71248	0.445951		flxA	b1566	-0.610438	NA			flxA	b1566	-2.10811	0.185442		flxA	b1566	0.19897	NA		flxA	b1566	-1.03306	NA			flxA	b1566
fmt	b3288	-0.176545	0.723331		fmt	b3288	-0.0632147	0.918367		fmt	b3288	-0.46458	0.255203			fmt	b3288	-0.613442	0.092884		fmt	b3288	-0.261565	0.599812		fmt	b3288	-0.20525	0.685098			fmt	b3288	-0.537746	0.168301		fmt	b3288	-0.168889	0.771572		fmt	b3288	-0.778325	0.0352679			fmt	b3288
fnr	b1334	0.646448	0.133563		fnr	b1334	0.0707162	0.915523		fnr	b1334	0.7885	0.0534372			fnr	b1334	0.675392	0.0875195		fnr	b1334	-0.733747	0.0981934		fnr	b1334	0.488963	0.300685			fnr	b1334	0.184542	0.736104		fnr	b1334	-0.597504	0.204007		fnr	b1334	0.296018	0.549708			fnr	b1334
fnrS	b4699	-3.55741	0.0752677		fnrS	b4699	-3.54877	0.0104007		fnrS	b4699	-3.69732	0.00158202			fnrS	b4699	-5.77497	0.00264209		fnrS	b4699	-2.68805	0.0254463		fnrS	b4699	-2.65431	0.0987926			fnrS	b4699	-5.58725	0.00260328		fnrS	b4699	-4.08296	0.000531602		fnrS	b4699	-5.0325	0.00128444			fnrS	b4699
focA	b0904	-1.7082	0.00953292		focA	b0904	-2.37345	0.000231781		focA	b0904	-2.03383	0.00149517			focA	b0904	-2.44144	6.13679e-05		focA	b0904	-1.55834	0.0255709		focA	b0904	-1.31295	0.0666839			focA	b0904	-1.85536	0.00355086		focA	b0904	-2.74643	1.19025e-05		focA	b0904	-2.05504	0.00110355			focA	b0904
focB	b2492	0.501531	0.596664		focB	b2492	-0.854709	0.298221		focB	b2492	0.0114599	0.990955			focB	b2492	-1.49088	0.112664		focB	b2492	0.0778573	0.938952		focB	b2492	-1.36653	0.214184			focB	b2492	-0.296979	0.738196		focB	b2492	0.0304406	0.974956		focB	b2492	-0.114635	0.897311			focB	b2492
folA	b0048	-0.377079	0.550529		folA	b0048	0.961281	0.089541		folA	b0048	0.310257	0.629883			folA	b0048	-0.28585	0.623596		folA	b0048	1.84907	0.000156285		folA	b0048	1.49979	0.00311034			folA	b0048	-0.680008	0.204923		folA	b0048	0.0131075	0.98697		folA	b0048	0.498761	0.397943			folA	b0048
folB	b3058	-0.143885	0.890896		folB	b3058	-0.446328	0.627217		folB	b3058	-0.0100206	0.993024			folB	b3058	0.101374	0.90614		folB	b3058	0.547238	0.476587		folB	b3058	0.3485	0.710769			folB	b3058	0.133414	0.878317		folB	b3058	0.00830615	0.993728		folB	b3058	0.0464613	0.963484			folB	b3058
folC	b2315	0.421619	0.394368		folC	b2315	-1.20917	0.00552675		folC	b2315	-1.15517	0.00402626			folC	b2315	1.27195	0.000695416		folC	b2315	0.349237	0.508592		folC	b2315	-0.245392	0.670997			folC	b2315	0.956878	0.0166406		folC	b2315	-0.52975	0.29595		folC	b2315	-0.690195	0.115501			folC	b2315
folD	b0529	1.31789	0.00265797		folD	b0529	0.0594729	0.935481		folD	b0529	0.0126445	0.987314			folD	b0529	2.6257	1.54115e-11		folD	b0529	-0.542234	0.311183		folD	b0529	-0.363116	0.535566			folD	b0529	1.47313	0.000430792		folD	b0529	-0.233253	0.732582		folD	b0529	-0.344659	0.533348			folD	b0529
folE	b2153	0.668489	0.271511		folE	b2153	1.19988	0.0341249		folE	b2153	0.675127	0.25641			folE	b2153	1.02723	0.0443164		folE	b2153	1.2437	0.0263428		folE	b2153	0.622988	0.342561			folE	b2153	0.402827	0.534529		folE	b2153	1.3148	0.015344		folE	b2153	1.32079	0.0111771			folE	b2153
folK	b0142	2.77169	0.0117324		folK	b0142	2.43243	0.073043		folK	b0142	2.52395	0.0515174			folK	b0142	2.89049	0.00377868		folK	b0142	2.1644	0.110829		folK	b0142	2.03015	0.244734			folK	b0142	2.71491	0.00725306		folK	b0142	2.33065	0.0718258		folK	b0142	0.370974	0.866025			folK	b0142
folM	b1606	0.496609	0.364302		folM	b1606	1.35411	0.00511973		folM	b1606	0.758389	0.115402			folM	b1606	-0.23485	0.675903		folM	b1606	1.91721	1.83217e-05		folM	b1606	0.765637	0.171327			folM	b1606	-0.0517006	0.941712		folM	b1606	1.77494	5.29027e-05		folM	b1606	0.670002	0.184774			folM	b1606
folP	b3177	1.25621	0.00753081		folP	b3177	0.290687	0.680828		folP	b3177	0.916302	0.0711629			folP	b3177	1.85449	1.12981e-05		folP	b3177	0.496416	0.412564		folP	b3177	1.19606	0.0279287			folP	b3177	1.6805	0.000105131		folP	b3177	-0.31056	0.656325		folP	b3177	1.12674	0.0227228			folP	b3177
folX	b2303	-1.90611	0.0123236		folX	b2303	-0.794177	0.409177		folX	b2303	-1.04138	0.201502			folX	b2303	-1.68495	0.0191964		folX	b2303	-0.46332	0.652438		folX	b2303	-1.19433	0.171327			folX	b2303	-1.19406	0.126622		folX	b2303	-0.482156	0.655858		folX	b2303	-0.756276	0.381018			folX	b2303
fpr	b3924	-1.47283	0.0003272		fpr	b3924	-0.670372	0.172131		fpr	b3924	-0.535402	0.249822			fpr	b3924	-0.870116	0.0301417		fpr	b3924	-0.905099	0.044637		fpr	b3924	-0.577419	0.264738			fpr	b3924	-1.31016	0.000669508		fpr	b3924	0.632316	0.182308		fpr	b3924	-0.0652601	0.915833			fpr	b3924
frc	b2374	0.387232	0.783464		frc	b2374	0.862311	0.549576		frc	b2374	0.365018	0.79904			frc	b2374	0.295232	0.804041		frc	b2374	2.87652	0.00333925		frc	b2374	3.40642	0.000409986			frc	b2374	0.971612	0.336091		frc	b2374	1.52548	0.175626		frc	b2374	0.700302	0.596979			frc	b2374
frdA	b4154	-1.41901	0.00204017		frdA	b4154	-2.44742	2.37296e-08		frdA	b4154	-1.30161	0.00517192			frdA	b4154	-1.02632	0.02417		frdA	b4154	-2.83939	1.03098e-10		frdA	b4154	-0.842129	0.118562			frdA	b4154	-0.645551	0.210037		frdA	b4154	-2.6084	1.15451e-09		frdA	b4154	-0.372078	0.522442			frdA	b4154
frdB	b4153	-0.54755	0.306446		frdB	b4153	-1.65808	0.000187734		frdB	b4153	-0.541654	0.299267			frdB	b4153	-0.251688	0.635735		frdB	b4153	-2.69189	5.00135e-10		frdB	b4153	-0.909798	0.111339			frdB	b4153	-0.109968	0.8609		frdB	b4153	-2.57661	3.22643e-10		frdB	b4153	0.0801328	0.907504			frdB	b4153
frdC	b4152	-1.57517	0.00795889		frdC	b4152	-0.948885	0.14866		frdC	b4152	-0.795362	0.209049			frdC	b4152	-1.64078	0.00238872		frdC	b4152	-2.76255	1.18979e-06		frdC	b4152	-0.966777	0.198866			frdC	b4152	-0.950885	0.100611		frdC	b4152	-2.45261	4.77431e-06		frdC	b4152	-0.351039	0.640114			frdC	b4152
frdD	b4151	-1.32759	0.0709027		frdD	b4151	-1.62041	0.0238683		frdD	b4151	-0.97152	0.190933			frdD	b4151	-2.25513	0.000566805		frdD	b4151	-2.72955	7.42258e-05		frdD	b4151	-0.576357	0.541531			frdD	b4151	-1.47452	0.0241631		frdD	b4151	-2.25086	0.000544023		frdD	b4151	-0.622701	0.449011			frdD	b4151
fre	b3844	-0.482107	0.233555		fre	b3844	-0.279725	0.554607		fre	b3844	-0.275085	0.504227			fre	b3844	-0.629292	0.0667497		fre	b3844	-0.760744	0.0431519		fre	b3844	-0.606027	0.149942			fre	b3844	-0.774089	0.0209369		fre	b3844	-0.0907382	0.869359		fre	b3844	-0.0797626	0.873494			fre	b3844
frlA	b3370	1.49956	0.374532		frlA	b3370	0.752201	0.651481		frlA	b3370	-0.221343	0.908066			frlA	b3370	1.362	0.348195		frlA	b3370	0.132384	0.951103		frlA	b3370	-1.29961	NA			frlA	b3370	1.18465	0.43332		frlA	b3370	0.737172	0.644136		frlA	b3370	-0.221669	0.908894			frlA	b3370
frlB	b3371	-0.512794	0.697567		frlB	b3371	-0.917612	0.496694		frlB	b3371	-0.848089	0.415947			frlB	b3371	-1.43475	0.157801		frlB	b3371	-0.188174	0.90219		frlB	b3371	-0.0167572	0.991708			frlB	b3371	-0.148631	0.90642		frlB	b3371	0.516405	0.693056		frlB	b3371	-0.328535	0.789307			frlB	b3371
frlC	b4474	-1.18255	0.267264		frlC	b4474	-0.399426	0.736025		frlC	b4474	-0.512895	0.546717			frlC	b4474	-1.35332	0.110889		frlC	b4474	-0.453844	0.673496		frlC	b4474	-0.869032	0.422022			frlC	b4474	0.11447	0.911515		frlC	b4474	0.0115852	0.992645		frlC	b4474	-0.87014	0.297923			frlC	b4474
frlD	b3374	0.772349	0.317896		frlD	b3374	-0.00290023	0.998168		frlD	b3374	-0.312543	0.705497			frlD	b3374	0.462471	0.531463		frlD	b3374	-0.22977	0.82446		frlD	b3374	-0.641892	0.490755			frlD	b3374	0.426757	0.590046		frlD	b3374	-0.298713	0.771572		frlD	b3374	-1.25634	0.0779864			frlD	b3374
frlR	b3375	0.839472	0.121829		frlR	b3375	0.569487	0.382636		frlR	b3375	-0.0686291	0.928625			frlR	b3375	0.387596	0.483454		frlR	b3375	0.363273	0.595888		frlR	b3375	0.0982674	0.912173			frlR	b3375	0.127469	0.849329		frlR	b3375	0.944534	0.0741749		frlR	b3375	-0.052366	0.94493			frlR	b3375
frmA	b0356	-0.670634	0.231477		frmA	b0356	-0.257439	0.726991		frmA	b0356	-0.206771	0.763903			frmA	b0356	-0.899502	0.0639526		frmA	b0356	-0.540546	0.394655		frmA	b0356	0.114931	0.886062			frmA	b0356	-0.227068	0.733105		frmA	b0356	-0.213488	0.787509		frmA	b0356	-0.277308	0.67294			frmA	b0356
frmB	b0355	0.175158	0.776923		frmB	b0355	0.796933	0.0834177		frmB	b0355	0.83064	0.0479667			frmB	b0355	0.0121517	0.986965		frmB	b0355	-0.0369666	0.96486		frmB	b0355	0.503006	0.379373			frmB	b0355	0.297499	0.545291		frmB	b0355	-0.0476282	0.948772		frmB	b0355	0.69993	0.119198			frmB	b0355
frmR	b0357	-0.546552	0.433267		frmR	b0357	-1.15725	0.112047		frmR	b0357	-0.495209	0.483436			frmR	b0357	-0.992954	0.0785354		frmR	b0357	-0.846857	0.233866		frmR	b0357	-0.906949	0.289238			frmR	b0357	-0.407818	0.546849		frmR	b0357	-0.748701	0.29595		frmR	b0357	-0.72883	0.294555			frmR	b0357
frr	b0172	-0.273387	0.633446		frr	b0172	-1.13768	0.0139297		frr	b0172	-1.52284	0.000323809			frr	b0172	0.178663	0.747391		frr	b0172	-0.774399	0.122365		frr	b0172	-1.42289	0.00134999			frr	b0172	0.0135452	0.988118		frr	b0172	-1.82837	1.50443e-05		frr	b0172	-1.70403	3.70979e-05			frr	b0172
frsA	b0239	0.127055	0.851945		frsA	b0239	-0.197088	0.762651		frsA	b0239	0.232459	0.694341			frsA	b0239	0.62155	0.177209		frsA	b0239	-0.396741	0.48965		frsA	b0239	0.386912	0.511308			frsA	b0239	0.0509589	0.942539		frsA	b0239	-0.294904	0.645218		frsA	b0239	0.390835	0.471912			frsA	b0239
fruA	b2167	-1.00321	0.0094235		fruA	b2167	-1.33848	0.000530509		fruA	b2167	-0.442741	0.327597			fruA	b2167	-1.41254	7.58019e-05		fruA	b2167	-0.717493	0.101914		fruA	b2167	0.189883	0.725951			fruA	b2167	-0.943537	0.0142881		fruA	b2167	-1.24588	0.00131017		fruA	b2167	-0.362827	0.436563			fruA	b2167
fruB	b2169	-2.97225	4.20259e-05		fruB	b2169	-2.88072	0.0001468		fruB	b2169	0.21595	0.851982			fruB	b2169	-2.60123	0.000250262		fruB	b2169	-1.84013	0.0249865		fruB	b2169	2.13883	0.00776328			fruB	b2169	-2.6647	0.000235229		fruB	b2169	-4.69279	4.5446e-11		fruB	b2169	2.81644	0.000111634			fruB	b2169
fruK	b2168	-1.29017	0.00196433		fruK	b2168	-1.26908	0.00382813		fruK	b2168	0.524048	0.287113			fruK	b2168	-1.5731	5.96441e-05		fruK	b2168	-0.549554	0.28422		fruK	b2168	0.974789	0.0341522			fruK	b2168	-1.12463	0.0066985		fruK	b2168	-1.17136	0.00752903		fruK	b2168	0.843827	0.0569187			fruK	b2168
frvA	b3900	-0.424724	NA		frvA	b3900	2.80075	NA		frvA	b3900	1.21384	NA			frvA	b3900	-1.27612	NA		frvA	b3900	1.86974	NA		frvA	b3900	1.95294	NA			frvA	b3900	0.471501	NA		frvA	b3900	2.40946	NA		frvA	b3900	0.991464	NA			frvA	b3900
frvB	b3899	-0.950927	0.403994		frvB	b3899	-0.484164	0.734837		frvB	b3899	-0.765486	0.494937			frvB	b3899	-2.03547	0.0336031		frvB	b3899	-0.250589	0.867385		frvB	b3899	-0.0324995	0.988106			frvB	b3899	-2.28644	0.00970265		frvB	b3899	-0.91354	0.448531		frvB	b3899	-0.417022	0.746021			frvB	b3899
frvR	b3897	1.2335	0.347808		frvR	b3897	0.555019	0.69754		frvR	b3897	0.938667	0.458296			frvR	b3897	0.39559	0.77851		frvR	b3897	-0.155771	0.927876		frvR	b3897	0.804124	0.654887			frvR	b3897	0.656884	0.609721		frvR	b3897	-0.415437	0.787391		frvR	b3897	1.16596	0.353156			frvR	b3897
frvX	b3898	-0.190304	0.879931		frvX	b3898	-2.00973	0.0569247		frvX	b3898	-0.839331	0.341279			frvX	b3898	-0.967399	0.276581		frvX	b3898	0.244777	0.830818		frvX	b3898	0.705855	0.482912			frvX	b3898	-0.700208	0.433304		frvX	b3898	-0.72367	0.456444		frvX	b3898	-0.59971	0.544079			frvX	b3898
frwA	b3947	-0.0684246	0.956995		frwA	b3947	-0.196788	0.899852		frwA	b3947	-0.821895	0.459218			frwA	b3947	-1.49379	0.122475		frwA	b3947	-0.424839	0.76283		frwA	b3947	1.12769	0.312344			frwA	b3947	-0.12516	0.92246		frwA	b3947	-0.208698	0.887605		frwA	b3947	-0.18122	0.896014			frwA	b3947
frwB	b3950	-0.277615	0.90827		frwB	b3950	3.82037	0.157005		frwB	b3950	0.819881	NA			frwB	b3950	-1.4292	0.437546		frwB	b3950	2.96527	0.28812		frwB	b3950	0.87885	NA			frwB	b3950	-0.802056	0.677027		frwB	b3950	3.29141	0.230954		frwB	b3950	1.186	0.585513			frwB	b3950
frwC	b3949	-2.00095	0.217535		frwC	b3949	-2.70866	0.28233		frwC	b3949	1.03602	0.518388			frwC	b3949	-3.76188	0.0223221		frwC	b3949	0.119182	0.963532		frwC	b3949	1.08072	NA			frwC	b3949	-2.63428	0.0347384		frwC	b3949	-0.7976	0.679337		frwC	b3949	0.815685	0.647326			frwC	b3949
frwD	b3953	1.03756	0.381816		frwD	b3953	1.27752	0.320022		frwD	b3953	0.00555284	0.997032			frwD	b3953	-0.564316	0.66807		frwD	b3953	0.320183	0.848257		frwD	b3953	1.04502	0.482945			frwD	b3953	-0.895412	0.460654		frwD	b3953	0.677936	0.640122		frwD	b3953	0.733627	0.585513			frwD	b3953
fryA	b2383	0.108234	0.90827		fryA	b2383	-0.0483497	0.966161		fryA	b2383	-0.121981	0.890065			fryA	b2383	-0.127664	0.872884		fryA	b2383	0.372069	0.647303		fryA	b2383	-0.145215	0.886109			fryA	b2383	-0.248068	0.753341		fryA	b2383	-0.296182	0.745809		fryA	b2383	-0.0272794	0.975234			fryA	b2383
fryB	b2387	0.151821	0.951162		fryB	b2387	-1.99857	0.520314		fryB	b2387	1.1866	NA			fryB	b2387	-2.97046	0.205553		fryB	b2387	-0.0491224	0.989454		fryB	b2387	1.67176	NA			fryB	b2387	-1.0812	0.612362		fryB	b2387	-0.664036	0.815522		fryB	b2387	2.23637	0.283038			fryB	b2387
fryC	b2386	-0.57623	0.679186		fryC	b2386	-0.953678	0.487993		fryC	b2386	-0.18871	0.903793			fryC	b2386	-4.36488	0.0127133		fryC	b2386	-0.334962	0.813897		fryC	b2386	1.59905	0.167878			fryC	b2386	-1.2421	0.220862		fryC	b2386	-0.591035	0.654476		fryC	b2386	0.639442	0.612007			fryC	b2386
fsaA	b0825	-0.932173	0.25182		fsaA	b0825	0.44826	0.594466		fsaA	b0825	-0.299942	0.697464			fsaA	b0825	-0.379903	0.599586		fsaA	b0825	0.067649	0.952173		fsaA	b0825	0.695873	0.350375			fsaA	b0825	-0.732462	0.269173		fsaA	b0825	0.299742	0.742248		fsaA	b0825	-0.0619735	0.945001			fsaA	b0825
fsaB	b3946	-2.86571	0.0622155		fsaB	b3946	0.3361	0.820611		fsaB	b3946	-0.49834	0.701655			fsaB	b3946	-0.987515	0.319862		fsaB	b3946	0.00836564	0.997654		fsaB	b3946	0.582912	0.705376			fsaB	b3946	-0.947188	0.327747		fsaB	b3946	-0.183552	0.904792		fsaB	b3946	1.00849	0.35083			fsaB	b3946
fsr	b0479	0.11959	0.885039		fsr	b0479	-0.395833	0.596519		fsr	b0479	-0.194682	0.790987			fsr	b0479	-0.514619	0.385137		fsr	b0479	-0.823217	0.188648		fsr	b0479	-0.28655	0.734289			fsr	b0479	-0.461307	0.457001		fsr	b0479	0.0323456	0.970932		fsr	b0479	0.35597	0.5941			fsr	b0479
ftnA	b1905	-0.695305	0.613953		ftnA	b1905	0.382251	0.786071		ftnA	b1905	-0.503981	0.688435			ftnA	b1905	-0.410772	0.733955		ftnA	b1905	1.72891	0.0838902		ftnA	b1905	0.131464	0.942289			ftnA	b1905	-0.611053	0.605646		ftnA	b1905	0.291289	0.847597		ftnA	b1905	0.216331	0.877572			ftnA	b1905
ftnB	b1902	-1.22784	0.0905224		ftnB	b1902	-1.36288	0.069101		ftnB	b1902	0.348365	0.66632			ftnB	b1902	-2.17635	0.000715243		ftnB	b1902	-0.713854	0.353687		ftnB	b1902	0.644155	0.446719			ftnB	b1902	-1.80631	0.00209774		ftnB	b1902	-1.10817	0.105976		ftnB	b1902	0.0999813	0.917649			ftnB	b1902
ftsA	b0094	-0.0167069	0.978548		ftsA	b0094	0.0597205	0.942812		ftsA	b0094	0.201376	0.768697			ftsA	b0094	0.572835	0.267675		ftsA	b0094	0.530229	0.382808		ftsA	b0094	-0.107296	0.888275			ftsA	b0094	0.797697	0.122911		ftsA	b0094	0.333942	0.642742		ftsA	b0094	0.468439	0.421322			ftsA	b0094
ftsB	b2748	1.11082	0.0154729		ftsB	b2748	1.02243	0.0400217		ftsB	b2748	0.585569	0.248366			ftsB	b2748	1.41699	0.000647982		ftsB	b2748	1.2552	0.00834884		ftsB	b2748	0.388671	0.52318			ftsB	b2748	0.863595	0.059649		ftsB	b2748	0.388588	0.536721		ftsB	b2748	0.069445	0.919413			ftsB	b2748
ftsE	b3463	0.21633	0.614489		ftsE	b3463	-0.402615	0.337452		ftsE	b3463	-0.2262	0.582808			ftsE	b3463	0.620671	0.0541297		ftsE	b3463	-0.267688	0.539317		ftsE	b3463	-0.26921	0.540905			ftsE	b3463	0.38097	0.304287		ftsE	b3463	-0.364155	0.387011		ftsE	b3463	-0.582039	0.097875			ftsE	b3463
ftsH	b3178	0.371105	0.440336		ftsH	b3178	-0.413136	0.423582		ftsH	b3178	-0.987632	0.0133355			ftsH	b3178	0.372556	0.392216		ftsH	b3178	-0.224374	0.68997		ftsH	b3178	-1.00467	0.0152345			ftsH	b3178	0.220214	0.675483		ftsH	b3178	-1.07081	0.00887286		ftsH	b3178	-1.62802	9.48667e-06			ftsH	b3178
ftsI	b0084	-0.693184	0.226593		ftsI	b0084	-0.41248	0.54666		ftsI	b0084	-0.1762	0.802755			ftsI	b0084	-0.738562	0.151002		ftsI	b0084	0.536008	0.387889		ftsI	b0084	-0.418924	0.50891			ftsI	b0084	-0.329094	0.606866		ftsI	b0084	-0.88227	0.121547		ftsI	b0084	-0.335633	0.597041			ftsI	b0084
ftsK	b0890	-0.913505	0.000117506		ftsK	b0890	-0.474606	0.0943427		ftsK	b0890	-0.501319	0.0526023			ftsK	b0890	-0.508232	0.0372663		ftsK	b0890	-0.762825	0.00314836		ftsK	b0890	-0.844711	0.00116438			ftsK	b0890	-0.831576	0.000389609		ftsK	b0890	-0.803273	0.00120065		ftsK	b0890	-0.750635	0.00205568			ftsK	b0890
ftsL	b0083	0.859837	0.0825144		ftsL	b0083	0.760224	0.151896		ftsL	b0083	0.514723	0.31715			ftsL	b0083	1.35895	0.00128836		ftsL	b0083	0.647284	0.226901		ftsL	b0083	-0.0992654	0.894086			ftsL	b0083	0.958337	0.0354127		ftsL	b0083	-0.472226	0.428966		ftsL	b0083	0.0734369	0.913705			ftsL	b0083
ftsN	b3933	1.36067	0.000428745		ftsN	b3933	1.11999	0.00827147		ftsN	b3933	0.546612	0.229393			ftsN	b3933	1.14265	0.00263299		ftsN	b3933	0.794086	0.0818174		ftsN	b3933	0.539119	0.269844			ftsN	b3933	1.05083	0.00764694		ftsN	b3933	0.512434	0.317397		ftsN	b3933	0.115064	0.843166			ftsN	b3933
ftsP	b3017	1.20166	0.000496666		ftsP	b3017	1.163	0.00172474		ftsP	b3017	1.12226	0.00177986			ftsP	b3017	1.33086	4.17917e-05		ftsP	b3017	1.13907	0.00242993		ftsP	b3017	1.07255	0.00898122			ftsP	b3017	1.01913	0.0027137		ftsP	b3017	1.0769	0.00309948		ftsP	b3017	1.41425	4.82113e-05			ftsP	b3017
ftsQ	b0093	0.128184	0.826988		ftsQ	b0093	-0.205595	0.728994		ftsQ	b0093	0.309215	0.534389			ftsQ	b0093	0.483833	0.250522		ftsQ	b0093	0.271204	0.626227		ftsQ	b0093	0.193994	0.734266			ftsQ	b0093	0.517142	0.242532		ftsQ	b0093	-0.463848	0.364795		ftsQ	b0093	0.162653	0.76837			ftsQ	b0093
ftsW	b0089	-0.240419	0.667377		ftsW	b0089	0.21716	0.718068		ftsW	b0089	1.12334	0.0051469			ftsW	b0089	-0.0991537	0.853332		ftsW	b0089	0.257071	0.651484		ftsW	b0089	0.767703	0.106599			ftsW	b0089	-0.219101	0.679813		ftsW	b0089	-0.300923	0.606753		ftsW	b0089	0.784339	0.068044			ftsW	b0089
ftsX	b3462	-0.668004	0.0537796		ftsX	b3462	-0.594472	0.117741		ftsX	b3462	-0.504643	0.147658			ftsX	b3462	-0.694049	0.0283179		ftsX	b3462	-0.308185	0.465065		ftsX	b3462	-0.442494	0.271819			ftsX	b3462	-0.621541	0.0582631		ftsX	b3462	-0.370403	0.366463		ftsX	b3462	-0.71413	0.0322241			ftsX	b3462
ftsY	b3464	0.286649	0.468892		ftsY	b3464	-0.127959	0.787456		ftsY	b3464	0.154734	0.713883			ftsY	b3464	1.5199	4.70797e-08		ftsY	b3464	0.35385	0.362442		ftsY	b3464	0.0859793	0.863665			ftsY	b3464	1.14613	7.74245e-05		ftsY	b3464	0.130202	0.795995		ftsY	b3464	0.19039	0.643548			ftsY	b3464
ftsZ	b0095	-0.0304856	0.960851		ftsZ	b0095	-0.182506	0.785515		ftsZ	b0095	0.272971	0.639582			ftsZ	b0095	-0.239153	0.657982		ftsZ	b0095	-0.00162575	0.998583		ftsZ	b0095	0.0930797	0.894941			ftsZ	b0095	0.096087	0.885233		ftsZ	b0095	0.41475	0.495168		ftsZ	b0095	0.41456	0.438415			ftsZ	b0095
fucA	b2800	-2.16672	0.0602391		fucA	b2800	-3.10809	0.0211531		fucA	b2800	-1.24874	0.206246			fucA	b2800	-1.28257	0.152931		fucA	b2800	-1.72517	0.0858013		fucA	b2800	0.742041	0.522174			fucA	b2800	-0.870774	0.34348		fucA	b2800	-2.18173	0.0193008		fucA	b2800	0.239558	0.843719			fucA	b2800
fucI	b2802	0.595669	0.456432		fucI	b2802	0.75111	0.366466		fucI	b2802	0.472923	0.55335			fucI	b2802	-0.513393	0.498674		fucI	b2802	0.513704	0.55553		fucI	b2802	0.646712	0.453729			fucI	b2802	-0.184232	0.837174		fucI	b2802	-0.115805	0.91722		fucI	b2802	-0.236176	0.800052			fucI	b2802
fucK	b2803	-0.992271	0.181221		fucK	b2803	0.198482	0.831958		fucK	b2803	-0.47251	0.474701			fucK	b2803	-1.47079	0.0159928		fucK	b2803	-0.518936	0.499397		fucK	b2803	-0.309131	0.73612			fucK	b2803	-0.760659	0.19651		fucK	b2803	0.25156	0.775328		fucK	b2803	-0.489906	0.484832			fucK	b2803
fucO	b2799	-1.89684	0.0020152		fucO	b2799	-1.60495	0.0145036		fucO	b2799	-0.361229	0.628255			fucO	b2799	-2.87118	7.43047e-07		fucO	b2799	-1.51923	0.0176436		fucO	b2799	-0.44883	0.595333			fucO	b2799	-1.85779	0.000545343		fucO	b2799	-1.441	0.0171756		fucO	b2799	-0.00831558	0.993079			fucO	b2799
fucP	b2801	0.560015	0.724839		fucP	b2801	-0.129189	0.94261		fucP	b2801	-0.344283	0.810153			fucP	b2801	-0.880081	0.543891		fucP	b2801	-0.265951	0.874377		fucP	b2801	-1.07644	0.542808			fucP	b2801	-1.12477	0.405261		fucP	b2801	-1.24828	0.340171		fucP	b2801	0.395611	0.777515			fucP	b2801
fucR	b2805	-0.655685	0.383996		fucR	b2805	0.373049	0.686148		fucR	b2805	1.21346	0.0669544			fucR	b2805	-1.4162	0.0206331		fucR	b2805	-0.0761227	0.948464		fucR	b2805	-0.358026	0.746392			fucR	b2805	-1.0041	0.115147		fucR	b2805	-0.205119	0.843601		fucR	b2805	1.6204	0.0106761			fucR	b2805
fucU	b2804	-0.642914	0.427794		fucU	b2804	0.598651	0.494676		fucU	b2804	-1.27543	0.0296106			fucU	b2804	-1.62687	0.0130884		fucU	b2804	0.850819	0.254473		fucU	b2804	-0.81238	0.317894			fucU	b2804	-0.69031	0.288475		fucU	b2804	0.758854	0.319634		fucU	b2804	-0.870339	0.180223			fucU	b2804
fumA	b1612	-0.0329029	0.968665		fumA	b1612	0.573813	0.516755		fumA	b1612	1.56539	0.0194005			fumA	b1612	-0.744529	0.29091		fumA	b1612	-0.586598	0.494288		fumA	b1612	0.61345	0.471923			fumA	b1612	0.0245352	0.983226		fumA	b1612	-0.0647465	0.957051		fumA	b1612	2.05286	0.0012468			fumA	b1612
fumB	b4122	0.744314	0.347278		fumB	b4122	-0.819738	0.33848		fumB	b4122	-0.491089	0.522636			fumB	b4122	0.188275	0.824243		fumB	b4122	-0.268387	0.774321		fumB	b4122	0.589314	0.498329			fumB	b4122	0.134759	0.880622		fumB	b4122	0.148149	0.876272		fumB	b4122	0.0584896	0.953642			fumB	b4122
fumC	b1611	0.692667	0.302578		fumC	b1611	1.1258	0.0801349		fumC	b1611	1.89806	0.00139489			fumC	b1611	0.748292	0.210963		fumC	b1611	-0.951095	0.166121		fumC	b1611	1.34319	0.059824			fumC	b1611	0.624052	0.345422		fumC	b1611	0.583893	0.440643		fumC	b1611	2.87997	2.47164e-07			fumC	b1611
fur	b0683	-0.585589	0.198222		fur	b0683	-0.217703	0.707869		fur	b0683	0.273125	0.588205			fur	b0683	-0.327867	0.465423		fur	b0683	-1.31007	0.00122645		fur	b0683	-1.11941	0.0106969			fur	b0683	-0.481607	0.287413		fur	b0683	-1.01083	0.0142168		fur	b0683	0.224578	0.667967			fur	b0683
fusA	b3340	1.29019	0.0178239		fusA	b3340	0.658247	0.336367		fusA	b3340	0.702685	0.257082			fusA	b3340	1.64173	0.00120465		fusA	b3340	0.777267	0.226661		fusA	b3340	0.933716	0.124925			fusA	b3340	1.5049	0.00428234		fusA	b3340	-0.228831	0.795648		fusA	b3340	0.36336	0.601774			fusA	b3340
fxsA	b4140	-3.36234	3.6273e-05		fxsA	b4140	-2.90994	7.83338e-05		fxsA	b4140	-3.63878	6.97497e-08			fxsA	b4140	-2.87343	6.10435e-05		fxsA	b4140	-1.4085	0.0831824		fxsA	b4140	-3.06934	3.08123e-05			fxsA	b4140	-3.45414	6.13464e-07		fxsA	b4140	-2.70455	0.000146372		fxsA	b4140	-3.65005	8.17973e-08			fxsA	b4140
gabD	b2661	-0.0596644	0.950343		gabD	b2661	-0.796057	0.350859		gabD	b2661	0.128727	0.905417			gabD	b2661	-0.331762	0.686499		gabD	b2661	-0.638025	0.462448		gabD	b2661	0.157086	0.8787			gabD	b2661	0.202136	0.833191		gabD	b2661	1.0402	0.195115		gabD	b2661	0.343019	0.70235			gabD	b2661
gabP	b2663	-1.55193	0.0350996		gabP	b2663	-1.62037	0.0352948		gabP	b2663	-0.125867	0.911049			gabP	b2663	-2.0515	0.00231002		gabP	b2663	-1.15632	0.158977		gabP	b2663	-0.0450327	0.974292			gabP	b2663	-0.960409	0.222982		gabP	b2663	0.797556	0.384699		gabP	b2663	-0.216913	0.828343			gabP	b2663
gabT	b2662	-0.214981	0.81857		gabT	b2662	-0.89518	0.254941		gabT	b2662	0.219306	0.810423			gabT	b2662	-0.316651	0.686367		gabT	b2662	-0.612018	0.460005		gabT	b2662	0.101996	0.922391			gabT	b2662	0.489067	0.544562		gabT	b2662	1.15094	0.117423		gabT	b2662	0.12832	0.892058			gabT	b2662
gadA	b3517	1.00174	0.0690993		gadA	b3517	0.212034	0.787595		gadA	b3517	0.704716	0.237328			gadA	b3517	0.788322	0.14351		gadA	b3517	-0.163623	0.845831		gadA	b3517	1.23389	0.0258834			gadA	b3517	0.226101	0.755953		gadA	b3517	0.324591	0.684266		gadA	b3517	0.175678	0.813022			gadA	b3517
gadB	b1493	0.678902	0.231516		gadB	b1493	0.103337	0.902906		gadB	b1493	0.747714	0.177205			gadB	b1493	0.676767	0.196527		gadB	b1493	-0.445305	0.492931		gadB	b1493	1.01222	0.0634303			gadB	b1493	0.00460502	0.996115		gadB	b1493	0.194959	0.813127		gadB	b1493	0.318216	0.623507			gadB	b1493
gadC	b1492	0.166533	0.818315		gadC	b1492	-0.28702	0.690643		gadC	b1492	0.16168	0.82046			gadC	b1492	-0.461631	0.3977		gadC	b1492	-1.04142	0.0544785		gadC	b1492	-0.00785236	0.991732			gadC	b1492	-0.885711	0.0892008		gadC	b1492	-0.263183	0.736443		gadC	b1492	-0.476588	0.42151			gadC	b1492
gadE	b3512	0.653654	0.395671		gadE	b3512	0.798532	0.326159		gadE	b3512	-0.263563	0.772261			gadE	b3512	0.584378	0.413882		gadE	b3512	1.10768	0.132429		gadE	b3512	-0.764098	0.320801			gadE	b3512	0.511495	0.525958		gadE	b3512	-0.1535	0.888602		gadE	b3512	-1.08816	0.113588			gadE	b3512
gadW	b3515	-1.55115	0.0062192		gadW	b3515	0.367984	0.646792		gadW	b3515	-0.169234	0.835068			gadW	b3515	-2.01805	0.000118801		gadW	b3515	0.327359	0.678387		gadW	b3515	-0.213161	0.791829			gadW	b3515	-1.45252	0.00758877		gadW	b3515	0.430431	0.586516		gadW	b3515	-0.709977	0.255872			gadW	b3515
gadX	b3516	-2.26899	0.00157724		gadX	b3516	0.0592935	0.966081		gadX	b3516	-0.59121	0.516877			gadX	b3516	-2.90689	1.73684e-05		gadX	b3516	0.375332	0.728615		gadX	b3516	-0.953661	0.269844			gadX	b3516	-2.02694	0.00451981		gadX	b3516	-0.0850602	0.949595		gadX	b3516	-0.691524	0.432542			gadX	b3516
gadY	b4452	-1.54912	0.13389		gadY	b4452	-1.5752	0.127928		gadY	b4452	-2.60989	0.00184084			gadY	b4452	-2.65484	0.00369814		gadY	b4452	1.43219	0.1395		gadY	b4452	0.062862	0.970306			gadY	b4452	-2.32178	0.00790515		gadY	b4452	-0.798106	0.492228		gadY	b4452	-1.90799	0.0290809			gadY	b4452
galE	b0759	0.485872	0.555901		galE	b0759	0.786011	0.333251		galE	b0759	0.649833	0.40053			galE	b0759	0.650031	0.354133		galE	b0759	0.549046	0.514282		galE	b0759	0.661467	0.428366			galE	b0759	0.330427	0.701579		galE	b0759	0.576678	0.513626		galE	b0759	1.23303	0.0692273			galE	b0759
galK	b0757	-1.1505	0.0020152		galK	b0757	-0.714372	0.0916052		galK	b0757	-0.833576	0.0262019			galK	b0757	-1.33471	0.000117265		galK	b0757	-0.339733	0.479836		galK	b0757	-1.09694	0.00560702			galK	b0757	-1.27065	0.000269607		galK	b0757	-0.451448	0.33436		galK	b0757	-0.866777	0.0204469			galK	b0757
galM	b0756	0.424037	0.26558		galM	b0756	0.533689	0.177417		galM	b0756	0.6825	0.0451419			galM	b0756	0.351881	0.322998		galM	b0756	0.197368	0.676889		galM	b0756	0.304971	0.479784			galM	b0756	0.660712	0.0482286		galM	b0756	0.669861	0.0664094		galM	b0756	0.55535	0.118059			galM	b0756
galP	b2943	-1.3528	0.0104801		galP	b2943	-2.15315	3.52982e-05		galP	b2943	-3.9945	2.2756e-18			galP	b2943	-1.0602	0.0366292		galP	b2943	-1.15375	0.0407453		galP	b2943	-2.86131	2.26428e-08			galP	b2943	-0.673124	0.235846		galP	b2943	-1.78564	0.000446644		galP	b2943	-3.07598	6.53986e-11			galP	b2943
galR	b2837	1.1265	0.0505301		galR	b2837	0.738245	0.27954		galR	b2837	0.242656	0.744961			galR	b2837	1.27886	0.0137923		galR	b2837	0.147026	0.874091		galR	b2837	-0.480301	0.547162			galR	b2837	1.3759	0.0083496		galR	b2837	-0.155593	0.864465		galR	b2837	0.0239861	0.975234			galR	b2837
galS	b2151	0.143322	0.92147		galS	b2151	0.108602	0.953837		galS	b2151	1.92359	0.0661882			galS	b2151	-0.114214	0.935921		galS	b2151	0.568903	0.686347		galS	b2151	1.47761	0.251016			galS	b2151	0.622022	0.600638		galS	b2151	0.172195	0.91722		galS	b2151	3.24143	0.000627506			galS	b2151
galT	b0758	0.203414	0.82854		galT	b0758	0.242281	0.799856		galT	b0758	0.686217	0.353672			galT	b0758	0.851977	0.189935		galT	b0758	0.256123	0.788728		galT	b0758	0.757343	0.342561			galT	b0758	0.547993	0.469846		galT	b0758	0.395012	0.669166		galT	b0758	1.15055	0.0854048			galT	b0758
galU	b1236	-0.92891	0.265419		galU	b1236	-1.50555	0.061671		galU	b1236	-2.53085	0.000237746			galU	b1236	-0.997717	0.183624		galU	b1236	1.0421	0.217138		galU	b1236	-1.08972	0.189065			galU	b1236	-0.335452	0.736575		galU	b1236	-0.749617	0.430572		galU	b1236	-1.93831	0.00625068			galU	b1236
gapA	b1779	0.307507	0.535285		gapA	b1779	-0.868813	0.0437537		gapA	b1779	0.533236	0.234037			gapA	b1779	0.828401	0.0322488		gapA	b1779	-1.3673	0.000581555		gapA	b1779	0.495449	0.290558			gapA	b1779	0.743744	0.0709546		gapA	b1779	-1.29226	0.00106799		gapA	b1779	0.910456	0.0225175			gapA	b1779
garD	b3128	-1.00772	0.255784		garD	b3128	-1.19041	0.22287		garD	b3128	0.335995	0.745738			garD	b3128	-1.89426	0.0111107		garD	b3128	-0.411468	0.712084		garD	b3128	0.80867	0.404342			garD	b3128	-0.577803	0.523805		garD	b3128	-0.987514	0.29685		garD	b3128	0.434465	0.664856			garD	b3128
garK	b3124	-0.231719	0.720011		garK	b3124	-0.454856	0.469825		garK	b3124	-0.990285	0.0178975			garK	b3124	-0.970859	0.0355165		garK	b3124	-0.478159	0.406228		garK	b3124	-0.730494	0.19356			garK	b3124	-0.00415827	0.996115		garK	b3124	0.192375	0.777279		garK	b3124	-0.838386	0.0609396			garK	b3124
garL	b3126	0.636211	0.604471		garL	b3126	-0.434104	0.77322		garL	b3126	-1.01187	0.386649			garL	b3126	-1.10228	0.341107		garL	b3126	-0.900581	0.476587		garL	b3126	1.43046	0.205845			garL	b3126	-0.516726	0.663593		garL	b3126	-0.274441	0.85506		garL	b3126	0.0654812	0.967346			garL	b3126
garP	b3127	-0.248531	0.9205		garP	b3127	-1.4317	0.573386		garP	b3127	1.17455	NA			garP	b3127	-2.14321	0.276		garP	b3127	-1.24888	0.595888		garP	b3127	1.95796	NA			garP	b3127	-1.27528	0.523431		garP	b3127	-1.66158	NA		garP	b3127	1.92854	NA			garP	b3127
garR	b3125	-0.648958	0.36761		garR	b3125	-0.532852	0.537681		garR	b3125	-0.417586	0.564992			garR	b3125	-0.939573	0.117824		garR	b3125	0.0509226	0.965242		garR	b3125	0.256778	0.767521			garR	b3125	-0.462642	0.506842		garR	b3125	0.202661	0.834472		garR	b3125	-0.560029	0.435299			garR	b3125
gatA	b2094	-0.0265843	0.986832		gatA	b2094	1.69183	0.336685		gatA	b2094	6.32604	2.70695e-06			gatA	b2094	-0.283217	0.880314		gatA	b2094	-1.54259	0.379012		gatA	b2094	3.64445	0.0162032			gatA	b2094	0.27404	0.896295		gatA	b2094	-3.07971	0.0443455		gatA	b2094	6.54392	7.599e-07			gatA	b2094
gatB	b2093	-1.57085	0.360728		gatB	b2093	1.47022	0.442056		gatB	b2093	5.83177	4.45124e-05			gatB	b2093	-2.36948	0.108708		gatB	b2093	-1.62529	0.374071		gatB	b2093	2.56179	0.137288			gatB	b2093	-1.29593	0.468056		gatB	b2093	-3.95027	0.00970289		gatB	b2093	6.05527	1.48041e-05			gatB	b2093
gatC	b2092	-0.879819	0.594524		gatC	b2092	0.703859	0.711466		gatC	b2092	5.48128	8.64517e-06			gatC	b2092	-0.850307	0.573397		gatC	b2092	-2.22117	0.135242		gatC	b2092	2.993	0.0321203			gatC	b2092	-0.331418	0.857941		gatC	b2092	-4.36752	0.000755713		gatC	b2092	6.04987	5.12686e-07			gatC	b2092
gatD	b2091	-0.9733	0.58017		gatD	b2091	1.23446	0.507698		gatD	b2091	5.00882	0.000192416			gatD	b2091	-1.89209	0.190943		gatD	b2091	-1.7231	0.309278		gatD	b2091	2.6585	0.0863627			gatD	b2091	-0.977786	0.582793		gatD	b2091	-3.84909	0.00760681		gatD	b2091	5.42875	3.43724e-05			gatD	b2091
gatR	b2087	0.688816	0.457539		gatR	b2087	2.16131	0.00652208		gatR	b2087	1.77761	0.0214192			gatR	b2087	0.475448	0.59241		gatR	b2087	0.555257	0.609461		gatR	b2087	0.0156125	0.991481			gatR	b2087	0.907406	0.287104		gatR	b2087	-0.0286963	0.983459		gatR	b2087	1.91695	0.012053			gatR	b2087
gatY	b2096	-0.562743	0.625613		gatY	b2096	-0.539784	0.681324		gatY	b2096	3.78905	7.24923e-06			gatY	b2096	-0.0685022	0.958414		gatY	b2096	-2.1643	0.0231246		gatY	b2096	2.11178	0.0258834			gatY	b2096	-0.241665	0.849751		gatY	b2096	-3.54091	4.60974e-05		gatY	b2096	4.09042	7.35627e-07			gatY	b2096
gatZ	b2095	-0.238858	0.861792		gatZ	b2095	0.435499	0.75232		gatZ	b2095	4.72613	5.93112e-08			gatZ	b2095	-0.556314	0.614585		gatZ	b2095	-1.48214	0.172151		gatZ	b2095	2.79414	0.00338651			gatZ	b2095	-0.375887	0.772999		gatZ	b2095	-2.87124	0.00228962		gatZ	b2095	5.05634	3.02036e-09			gatZ	b2095
gcd	b0124	0.0677748	0.930135		gcd	b0124	0.300506	0.699534		gcd	b0124	1.05295	0.0599539			gcd	b0124	-0.498549	0.3977		gcd	b0124	-0.0313961	0.97548		gcd	b0124	0.847902	0.167878			gcd	b0124	0.337598	0.627351		gcd	b0124	0.651664	0.338716		gcd	b0124	0.817744	0.162518			gcd	b0124
gcl	b0507	-0.586222	0.536388		gcl	b0507	0.662803	0.496411		gcl	b0507	-0.591147	0.485363			gcl	b0507	-0.659211	0.409158		gcl	b0507	1.08262	0.19705		gcl	b0507	1.21381	0.120305			gcl	b0507	-0.683654	0.411712		gcl	b0507	0.756675	0.413932		gcl	b0507	-0.57227	0.513181			gcl	b0507
gcvA	b2808	-0.716279	0.27638		gcvA	b2808	-0.841463	0.142676		gcvA	b2808	-1.43081	0.00155649			gcvA	b2808	-0.395166	0.4967		gcvA	b2808	-0.926493	0.0870157		gcvA	b2808	-1.37937	0.0130666			gcvA	b2808	-0.376813	0.533172		gcvA	b2808	-0.638549	0.262783		gcvA	b2808	-1.08076	0.0238265			gcvA	b2808
gcvB	b4443	-1.94269	0.222572		gcvB	b4443	-1.83115	0.294798		gcvB	b4443	-3.5854	0.0107546			gcvB	b4443	-1.66846	0.262491		gcvB	b4443	1.37388	0.439289		gcvB	b4443	0.175565	0.940491			gcvB	b4443	-1.77194	0.262285		gcvB	b4443	-1.94286	0.259649		gcvB	b4443	-0.467541	0.811604			gcvB	b4443
gcvH	b2904	0.658026	0.359874		gcvH	b2904	0.590808	0.433627		gcvH	b2904	-0.87904	0.155574			gcvH	b2904	1.80769	0.000853878		gcvH	b2904	-0.477963	0.535025		gcvH	b2904	-1.85425	0.00290623			gcvH	b2904	1.5178	0.00737457		gcvH	b2904	-0.755439	0.29595		gcvH	b2904	-0.455656	0.518142			gcvH	b2904
gcvP	b2903	0.642257	0.369213		gcvP	b2903	0.836538	0.250835		gcvP	b2903	-0.654615	0.346218			gcvP	b2903	1.66027	0.003179		gcvP	b2903	-0.01058	0.994354		gcvP	b2903	-1.30728	0.0434596			gcvP	b2903	1.40825	0.0181605		gcvP	b2903	0.0845469	0.935937		gcvP	b2903	-0.14692	0.866333			gcvP	b2903
gcvR	b2479	-0.835472	0.120735		gcvR	b2479	-0.797504	0.15605		gcvR	b2479	-2.18906	3.86142e-07			gcvR	b2479	-0.824961	0.0868436		gcvR	b2479	-0.789658	0.148474		gcvR	b2479	-2.54905	1.73409e-07			gcvR	b2479	-0.804609	0.103714		gcvR	b2479	0.238572	0.744752		gcvR	b2479	-1.62844	0.000227782			gcvR	b2479
gcvT	b2905	0.504302	0.513297		gcvT	b2905	-0.104654	0.918367		gcvT	b2905	-1.6618	0.00498924			gcvT	b2905	1.76509	0.00183508		gcvT	b2905	-0.617091	0.422055		gcvT	b2905	-2.03063	0.000864913			gcvT	b2905	1.43619	0.017001		gcvT	b2905	-0.8464	0.252164		gcvT	b2905	-0.949597	0.142343			gcvT	b2905
gdhA	b1761	0.394632	0.50808		gdhA	b1761	-0.304493	0.667048		gdhA	b1761	-1.32829	0.0051469			gdhA	b1761	0.886389	0.0618744		gdhA	b1761	0.159927	0.833458		gdhA	b1761	-1.46525	0.00306526			gdhA	b1761	0.848117	0.0912138		gdhA	b1761	1.6836	0.000357413		gdhA	b1761	-0.723503	0.167428			gdhA	b1761
gfcA	b0987	0.290201	0.853758		gfcA	b0987	2.18623	0.0170476		gfcA	b0987	1.58183	0.0830816			gfcA	b0987	0.904234	0.376038		gfcA	b0987	1.71044	0.0802337		gfcA	b0987	2.03605	0.0365765			gfcA	b0987	0.325495	0.793751		gfcA	b0987	0.559084	0.669166		gfcA	b0987	0.0835529	0.956094			gfcA	b0987
gfcB	b0986	2.97107	0.036447		gfcB	b0986	0.920505	0.613562		gfcB	b0986	0.672609	0.675326			gfcB	b0986	0.937634	0.607109		gfcB	b0986	1.45755	0.315759		gfcB	b0986	1.18163	NA			gfcB	b0986	0.122579	0.959444		gfcB	b0986	0.438479	0.827209		gfcB	b0986	0.597873	0.731522			gfcB	b0986
gfcC	b0985	0.268439	0.930078		gfcC	b0985	-0.154567	0.945162		gfcC	b0985	0.397434	0.799903			gfcC	b0985	1.98474	0.223346		gfcC	b0985	1.22163	0.378932		gfcC	b0985	0.83294	0.625718			gfcC	b0985	0.992044	0.615211		gfcC	b0985	0.588245	0.731141		gfcC	b0985	0.0468805	0.977529			gfcC	b0985
gfcD	b0984	1.10207	0.109819		gfcD	b0984	0.920082	0.186609		gfcD	b0984	0.364551	0.615332			gfcD	b0984	0.385221	0.607155		gfcD	b0984	0.610808	0.409092		gfcD	b0984	1.02277	0.141207			gfcD	b0984	0.230292	0.780999		gfcD	b0984	0.784376	0.253152		gfcD	b0984	-0.037333	0.968874			gfcD	b0984
gfcE	b0983	-0.8723	0.611646		gfcE	b0983	1.26853	0.314749		gfcE	b0983	0.205258	0.879949			gfcE	b0983	-0.205567	0.886512		gfcE	b0983	1.23521	0.301964		gfcE	b0983	1.33273	0.23484			gfcE	b0983	0.505914	0.685613		gfcE	b0983	1.72389	0.105864		gfcE	b0983	0.819206	0.459076			gfcE	b0983
ggt	b3447	-0.167111	0.824162		ggt	b3447	0.463669	0.505468		ggt	b3447	-0.0865642	0.915764			ggt	b3447	-0.00280015	0.997218		ggt	b3447	0.0538715	0.95665		ggt	b3447	-0.357773	0.606949			ggt	b3447	0.416535	0.514379		ggt	b3447	0.80705	0.186515		ggt	b3447	0.516155	0.398584			ggt	b3447
ghrA	b1033	-1.09028	0.0378176		ghrA	b1033	0.0634946	0.938157		ghrA	b1033	0.767554	0.1508			ghrA	b1033	-0.527247	0.313078		ghrA	b1033	-0.628019	0.295255		ghrA	b1033	0.107508	0.901437			ghrA	b1033	-0.8738	0.078987		ghrA	b1033	1.08975	0.0318508		ghrA	b1033	1.4912	0.00168506			ghrA	b1033
ghrB	b3553	0.961953	0.126083		ghrB	b3553	0.0523402	0.962567		ghrB	b3553	0.477092	0.514816			ghrB	b3553	1.19736	0.0345236		ghrB	b3553	-0.656264	0.374742		ghrB	b3553	0.221683	0.805662			ghrB	b3553	0.534335	0.446836		ghrB	b3553	0.6715	0.366463		ghrB	b3553	1.08795	0.0804895			ghrB	b3553
glcA	b2975	1.02429	0.121384		glcA	b2975	-0.414331	0.680828		glcA	b2975	-1.08377	0.0720114			glcA	b2975	-0.619744	0.391462		glcA	b2975	0.552828	0.482623		glcA	b2975	0.146745	0.876558			glcA	b2975	0.475586	0.497493		glcA	b2975	0.390692	0.652438		glcA	b2975	-1.39723	0.026863			glcA	b2975
glcB	b2976	0.245827	0.703348		glcB	b2976	-0.296403	0.677449		glcB	b2976	-0.712025	0.174653			glcB	b2976	0.322242	0.554758		glcB	b2976	-0.226878	0.756848		glcB	b2976	0.47741	0.426015			glcB	b2976	0.658944	0.201715		glcB	b2976	-0.199087	0.796268		glcB	b2976	-0.121295	0.862981			glcB	b2976
glcC	b2980	0.384102	0.678881		glcC	b2980	1.87246	0.00796431		glcC	b2980	2.66636	4.34151e-05			glcC	b2980	-0.788256	0.302194		glcC	b2980	1.01742	0.211835		glcC	b2980	1.91311	0.0136088			glcC	b2980	0.51946	0.519832		glcC	b2980	1.8171	0.00808447		glcC	b2980	2.46641	0.00017945			glcC	b2980
glcD	b2979	1.54209	0.103837		glcD	b2979	0.473451	0.724022		glcD	b2979	-0.34853	0.755213			glcD	b2979	0.49431	0.648189		glcD	b2979	0.778369	0.491342		glcD	b2979	3.2494	1.31395e-05			glcD	b2979	0.498253	0.651686		glcD	b2979	0.776082	0.496656		glcD	b2979	-0.357135	0.756124			glcD	b2979
glcE	b4468	0.828404	0.438081		glcE	b4468	0.0368467	0.982441		glcE	b4468	1.60989	0.105695			glcE	b4468	0.506159	0.607109		glcE	b4468	0.109222	0.941832		glcE	b4468	4.0439	5.07337e-06			glcE	b4468	0.752621	0.409511		glcE	b4468	0.102674	0.942905		glcE	b4468	1.23317	0.270906			glcE	b4468
glcF	b4467	-0.390919	0.584015		glcF	b4467	0.00963734	0.99387		glcF	b4467	-0.58429	0.35698			glcF	b4467	-1.14	0.0379177		glcF	b4467	-0.159682	0.861178		glcF	b4467	0.135063	0.876342			glcF	b4467	-0.471128	0.469846		glcF	b4467	-0.24537	0.779872		glcF	b4467	-0.218065	0.772685			glcF	b4467
glcG	b2977	0.544831	0.508643		glcG	b2977	0.28683	0.778837		glcG	b2977	-0.248502	0.783548			glcG	b2977	0.132642	0.878957		glcG	b2977	-0.720319	0.420619		glcG	b2977	0.757424	0.357418			glcG	b2977	1.06842	0.0965104		glcG	b2977	-0.316836	0.763008		glcG	b2977	-0.468731	0.585097			glcG	b2977
gldA	b3945	-1.41422	0.00211729		gldA	b3945	-2.57445	3.24936e-09		gldA	b3945	-1.08153	0.0160326			gldA	b3945	-0.884309	0.0374839		gldA	b3945	-2.50381	2.08517e-09		gldA	b3945	-1.24151	0.0398123			gldA	b3945	-0.647291	0.149706		gldA	b3945	-2.70056	9.45522e-12		gldA	b3945	-0.666617	0.184701			gldA	b3945
glf	b2036	-2.4763	0.000325527		glf	b2036	-0.65391	0.490485		glf	b2036	-0.603135	0.480019			glf	b2036	-2.89906	8.80112e-06		glf	b2036	0.891991	0.288319		glf	b2036	-0.028753	0.983396			glf	b2036	-2.1937	0.000939395		glf	b2036	-0.571656	0.564234		glf	b2036	-0.170312	0.869281			glf	b2036
glgA	b3429	1.08197	0.0648319		glgA	b3429	0.477162	0.530429		glgA	b3429	-0.275988	0.717897			glgA	b3429	0.38449	0.553367		glgA	b3429	-0.0915264	0.924606		glgA	b3429	-0.491867	0.484558			glgA	b3429	0.640243	0.325319		glgA	b3429	-0.0630502	0.950483		glgA	b3429	-1.00212	0.0922767			glgA	b3429
glgB	b3432	-0.577705	0.262977		glgB	b3432	0.0229044	0.978684		glgB	b3432	-0.457691	0.392278			glgB	b3432	-0.742755	0.101833		glgB	b3432	-0.901475	0.0718605		glgB	b3432	-0.593138	0.264084			glgB	b3432	-0.601989	0.228903		glgB	b3432	-0.232671	0.744752		glgB	b3432	-0.62325	0.211173			glgB	b3432
glgC	b3430	-0.364385	0.607247		glgC	b3430	-0.392112	0.617559		glgC	b3430	-0.531473	0.424871			glgC	b3430	-1.14959	0.0343876		glgC	b3430	-0.772383	0.241259		glgC	b3430	-0.263921	0.732138			glgC	b3430	-0.714867	0.251212		glgC	b3430	-0.530441	0.480553		glgC	b3430	-0.689175	0.270709			glgC	b3430
glgP	b3428	0.229384	0.695758		glgP	b3428	0.397053	0.49533		glgP	b3428	-0.179467	0.769405			glgP	b3428	-0.375181	0.440178		glgP	b3428	-0.323166	0.582177		glgP	b3428	-0.74117	0.13184			glgP	b3428	-0.0170516	0.982587		glgP	b3428	-0.351184	0.571743		glgP	b3428	-0.84018	0.0639801			glgP	b3428
glgS	b3049	-4.07009	9.56877e-06		glgS	b3049	-1.43171	0.193327		glgS	b3049	-2.04449	0.028076			glgS	b3049	-5.06661	1.26143e-08		glgS	b3049	0.385562	0.78091		glgS	b3049	-0.794192	0.488012			glgS	b3049	-4.67091	3.50059e-08		glgS	b3049	-0.981109	0.413816		glgS	b3049	-1.86348	0.0471241			glgS	b3049
glgX	b3431	-0.237373	0.648322		glgX	b3431	0.0787653	0.906504		glgX	b3431	-0.288743	0.56165			glgX	b3431	-0.520914	0.209213		glgX	b3431	-0.682737	0.132837		glgX	b3431	-0.486616	0.304686			glgX	b3431	-0.287266	0.569156		glgX	b3431	-0.49877	0.319292		glgX	b3431	-0.726085	0.0824032			glgX	b3431
glk	b2388	-1.15338	0.0387453		glk	b2388	-1.01299	0.0935709		glk	b2388	0.134599	0.861528			glk	b2388	-1.31326	0.0101232		glk	b2388	0.108139	0.901966		glk	b2388	0.665709	0.289911			glk	b2388	-1.03587	0.0552566		glk	b2388	-1.55043	0.00376166		glk	b2388	0.250346	0.723061			glk	b2388
glmM	b3176	-0.802787	0.00523314		glmM	b3176	-0.523464	0.114596		glmM	b3176	-0.435682	0.160093			glmM	b3176	-0.376236	0.204793		glmM	b3176	-0.39141	0.254192		glmM	b3176	-0.1679	0.685098			glmM	b3176	-0.526721	0.0698363		glmM	b3176	-0.447674	0.177891		glmM	b3176	-0.135296	0.726189			glmM	b3176
glmS	b3729	0.70278	0.0584396		glmS	b3729	0.452181	0.317222		glmS	b3729	0.199037	0.673719			glmS	b3729	0.163415	0.70967		glmS	b3729	0.34248	0.459951		glmS	b3729	0.455462	0.288969			glmS	b3729	0.518406	0.182481		glmS	b3729	0.260865	0.614669		glmS	b3729	-0.304005	0.48964			glmS	b3729
glmU	b3730	0.0140032	0.9745		glmU	b3730	0.06993	0.901509		glmU	b3730	-0.475845	0.196075			glmU	b3730	-0.10733	0.800032		glmU	b3730	0.70894	0.0510718		glmU	b3730	-0.295581	0.486148			glmU	b3730	0.298823	0.457299		glmU	b3730	0.327069	0.463384		glmU	b3730	-0.522013	0.149668			glmU	b3730
glmY	b4441	2.32164	0.00098039		glmY	b4441	0.95622	0.297863		glmY	b4441	-1.7436	0.0193367			glmY	b4441	1.20227	0.106881		glmY	b4441	0.811643	0.375997		glmY	b4441	-3.29961	2.77985e-06			glmY	b4441	1.7941	0.0142527		glmY	b4441	-2.88897	5.29027e-05		glmY	b4441	-2.42166	0.00053945			glmY	b4441
glmZ	b4456	0.128493	0.879549		glmZ	b4456	0.0526313	0.958573		glmZ	b4456	0.144674	0.857243			glmZ	b4456	-0.523018	0.397953		glmZ	b4456	-0.147491	0.868787		glmZ	b4456	-1.61082	0.00520243			glmZ	b4456	-0.0794766	0.926446		glmZ	b4456	-1.2976	0.0254831		glmZ	b4456	-0.760042	0.208603			glmZ	b4456
glnA	b3870	0.0548545	0.9607		glnA	b3870	-1.95519	0.0205		glnA	b3870	-2.08656	0.00890366			glnA	b3870	0.620862	0.490872		glnA	b3870	-1.05371	0.26894		glnA	b3870	-0.989174	0.29384			glnA	b3870	0.446082	0.6731		glnA	b3870	0.256749	0.847714		glnA	b3870	0.340699	0.754178			glnA	b3870
glnB	b2553	0.246877	0.703939		glnB	b2553	0.22129	0.744844		glnB	b2553	-0.128204	0.850013			glnB	b2553	0.729964	0.117824		glnB	b2553	0.0262111	0.976173		glnB	b2553	-0.594223	0.335097			glnB	b2553	0.398818	0.473367		glnB	b2553	-0.327285	0.620824		glnB	b2553	-0.181442	0.777889			glnB	b2553
glnD	b0167	0.346453	0.548693		glnD	b0167	-0.684462	0.199471		glnD	b0167	-1.38202	0.0013733			glnD	b0167	0.446554	0.36311		glnD	b0167	-0.252685	0.688161		glnD	b0167	-0.734607	0.152314			glnD	b0167	-0.231673	0.700498		glnD	b0167	0.343419	0.584075		glnD	b0167	-0.94897	0.0360073			glnD	b0167
glnE	b3053	0.368947	0.379642		glnE	b3053	0.159571	0.763609		glnE	b3053	0.475632	0.236296			glnE	b3053	0.33256	0.386919		glnE	b3053	0.0814866	0.890307		glnE	b3053	0.365605	0.432747			glnE	b3053	0.27944	0.519832		glnE	b3053	0.612374	0.13037		glnE	b3053	0.419231	0.306733			glnE	b3053
glnG	b3868	-0.653194	0.527387		glnG	b3868	-2.43354	0.00380264		glnG	b3868	-1.94111	0.0198283			glnG	b3868	-0.417034	0.678183		glnG	b3868	-1.11686	0.252847		glnG	b3868	-1.08582	0.263716			glnG	b3868	-0.622154	0.546539		glnG	b3868	-0.0858499	0.954372		glnG	b3868	-0.759764	0.440847			glnG	b3868
glnH	b0811	-1.211	0.174426		glnH	b0811	-2.52618	0.00177893		glnH	b0811	-3.03603	6.99739e-05			glnH	b0811	-1.21139	0.14006		glnH	b0811	-1.73533	0.0452568		glnH	b0811	-2.99156	0.000168891			glnH	b0811	-1.23813	0.154046		glnH	b0811	-0.417148	0.742248		glnH	b0811	-0.823491	0.379181			glnH	b0811
glnK	b0450	2.63128	0.243644		glnK	b0450	-4.33166	0.0185069		glnK	b0450	-4.93183	0.00384722			glnK	b0450	2.8199	0.156397		glnK	b0450	0.383081	0.892463		glnK	b0450	-1.98452	0.335837			glnK	b0450	0.893033	0.744886		glnK	b0450	2.3431	0.268549		glnK	b0450	0.0177321	0.994946			glnK	b0450
glnL	b3869	0.342532	0.757049		glnL	b3869	-2.0076	0.015307		glnL	b3869	-1.34719	0.110361			glnL	b3869	0.062335	0.957056		glnL	b3869	-0.432605	0.698848		glnL	b3869	-0.778943	0.434089			glnL	b3869	-0.0327924	0.981452		glnL	b3869	0.341936	0.786892		glnL	b3869	0.197465	0.863728			glnL	b3869
glnP	b0810	-0.575863	0.560415		glnP	b0810	-2.16826	0.00511973		glnP	b0810	-2.26057	0.0019853			glnP	b0810	-0.730786	0.385793		glnP	b0810	-1.14437	0.189272		glnP	b0810	-1.87714	0.0187256			glnP	b0810	-0.647327	0.487532		glnP	b0810	0.1947	0.875498		glnP	b0810	-0.30571	0.763839			glnP	b0810
glnQ	b0809	1.80773	0.0377481		glnQ	b0809	-1.37623	0.169068		glnQ	b0809	-2.00788	0.0189282			glnQ	b0809	2.0717	0.0105103		glnQ	b0809	-0.779427	0.473964		glnQ	b0809	-1.94964	0.0341063			glnQ	b0809	1.84073	0.0313787		glnQ	b0809	0.283261	0.840785		glnQ	b0809	-0.202881	0.870354			glnQ	b0809
glnS	b0680	1.10008	0.0270598		glnS	b0680	0.267462	0.709989		glnS	b0680	-0.0270114	0.975425			glnS	b0680	1.57923	0.00047958		glnS	b0680	0.711656	0.215337		glnS	b0680	0.0292932	0.975616			glnS	b0680	1.00563	0.04417		glnS	b0680	0.453432	0.494073		glnS	b0680	-0.0517232	0.944904			glnS	b0680
glnU	b0670	3.1048	9.94261e-07		glnU	b0670	1.73738	0.0160853		glnU	b0670	0.519772	0.540903			glnU	b0670	3.41244	2.6895e-08		glnU	b0670	2.10373	0.00278708		glnU	b0670	1.62044	0.0251947			glnU	b0670	2.498	0.000109947		glnU	b0670	0.31977	0.773619		glnU	b0670	0.44541	0.614216			glnU	b0670
glnV	b0665	0.0541575	0.960851		glnV	b0665	0.800603	0.433095		glnV	b0665	-0.782088	0.39736			glnV	b0665	-0.695151	0.432463		glnV	b0665	1.0203	0.273886		glnV	b0665	-0.343658	0.750288			glnV	b0665	-0.999992	0.261542		glnV	b0665	-1.87956	0.0244293		glnV	b0665	-1.84698	0.0189441			glnV	b0665
glnW	b0668	3.55958	1.39248e-08		glnW	b0668	1.43126	0.0579445		glnW	b0668	0.745352	0.348112			glnW	b0668	4.06945	1.75573e-11		glnW	b0668	1.91973	0.00673342		glnW	b0668	1.39665	0.0616786			glnW	b0668	2.89769	4.44393e-06		glnW	b0668	0.192991	0.864837		glnW	b0668	0.293751	0.754667			glnW	b0668
glnX	b0664	-0.807429	0.362096		glnX	b0664	0.953889	0.266041		glnX	b0664	-1.19499	0.104711			glnX	b0664	-1.29907	0.0780381		glnX	b0664	0.616943	0.495677		glnX	b0664	-1.47901	0.0578828			glnX	b0664	-1.19111	0.114007		glnX	b0664	-2.46896	0.000609735		glnX	b0664	-2.10655	0.00200777			glnX	b0664
gloA	b1651	-0.771021	0.219353		gloA	b1651	-0.245967	0.762263		gloA	b1651	0.324032	0.646117			gloA	b1651	-0.552835	0.344087		gloA	b1651	0.10003	0.914259		gloA	b1651	0.296551	0.710769			gloA	b1651	-0.147845	0.844615		gloA	b1651	0.889678	0.147376		gloA	b1651	0.689777	0.259851			gloA	b1651
gloB	b0212	-1.24228	0.0386205		gloB	b0212	0.409956	0.584642		gloB	b0212	0.172728	0.818822			gloB	b0212	-1.08601	0.042805		gloB	b0212	0.978948	0.100015		gloB	b0212	0.622616	0.360447			gloB	b0212	-0.890829	0.103463		gloB	b0212	0.784446	0.208003		gloB	b0212	0.899298	0.109965			gloB	b0212
glpA	b2241	-7.49093	2.57494e-18		glpA	b2241	-6.92642	1.77605e-18		glpA	b2241	-2.3275	0.00448665			glpA	b2241	-3.45318	1.78976e-06		glpA	b2241	-5.05969	2.25173e-11		glpA	b2241	-0.580637	0.598156			glpA	b2241	-6.16172	5.9043e-18		glpA	b2241	-4.97586	1.40348e-11		glpA	b2241	1.49006	0.0773913			glpA	b2241
glpB	b2242	-6.58647	8.50378e-11		glpB	b2242	-5.25645	2.12451e-09		glpB	b2242	-1.19009	0.241398			glpB	b2242	-2.25517	0.00548253		glpB	b2242	-4.60713	4.79075e-08		glpB	b2242	-0.630656	0.624168			glpB	b2242	-4.73021	1.5074e-09		glpB	b2242	-3.91503	1.82604e-06		glpB	b2242	2.24107	0.0093992			glpB	b2242
glpC	b2243	-4.71667	1.34584e-06		glpC	b2243	-3.43598	5.63532e-05		glpC	b2243	-0.372048	0.755213			glpC	b2243	-1.94291	0.0151296		glpC	b2243	-3.08376	0.000309327		glpC	b2243	-0.575548	0.661396			glpC	b2243	-4.18922	6.65408e-08		glpC	b2243	-2.65899	0.00122017		glpC	b2243	1.92855	0.0227382			glpC	b2243
glpD	b3426	-3.45837	1.09214e-09		glpD	b3426	-0.503478	0.559303		glpD	b3426	0.6155	0.409144			glpD	b3426	1.37534	0.021794		glpD	b3426	-0.719339	0.349141		glpD	b3426	1.17543	0.0895659			glpD	b3426	-1.55593	0.0108913		glpD	b3426	3.23157	1.9102e-08		glpD	b3426	3.93005	2.56637e-12			glpD	b3426
glpE	b3425	0.443437	0.647289		glpE	b3425	0.567386	0.560843		glpE	b3425	1.71483	0.0216867			glpE	b3425	1.30975	0.0520165		glpE	b3425	0.185184	0.874091		glpE	b3425	1.18014	0.236989			glpE	b3425	0.405403	0.647525		glpE	b3425	1.81671	0.00824878		glpE	b3425	2.88881	2.60556e-05			glpE	b3425
glpF	b3927	-5.25937	4.74812e-12		glpF	b3927	-1.31122	0.172951		glpF	b3927	1.52871	0.0734125			glpF	b3927	-1.98394	0.0092717		glpF	b3927	-2.66204	0.00156713		glpF	b3927	1.25031	0.188967			glpF	b3927	-2.93896	8.52232e-05		glpF	b3927	-0.479414	0.693092		glpF	b3927	4.61892	2.46476e-10			glpF	b3927
glpG	b3424	-0.289116	0.713008		glpG	b3424	-0.0196865	0.985178		glpG	b3424	-0.406062	0.53657			glpG	b3424	-0.00305729	0.997218		glpG	b3424	0.747351	0.237472		glpG	b3424	0.184913	0.822158			glpG	b3424	9.61392e-05	0.999952		glpG	b3424	1.04264	0.0750551		glpG	b3424	0.217942	0.76423			glpG	b3424
glpK	b3926	-3.95549	8.62477e-08		glpK	b3926	-0.149788	0.910083		glpK	b3926	1.77515	0.0302129			glpK	b3926	0.321023	0.747428		glpK	b3926	-2.0056	0.0188864		glpK	b3926	0.717829	0.479784			glpK	b3926	-1.10873	0.206821		glpK	b3926	0.114907	0.934848		glpK	b3926	4.61014	1.72455e-10			glpK	b3926
glpQ	b2239	-1.63386	0.0132099		glpQ	b2239	-1.26795	0.0878215		glpQ	b2239	-0.877287	0.231051			glpQ	b2239	0.340859	0.662568		glpQ	b2239	-0.850351	0.279119		glpQ	b2239	-0.892865	0.25398			glpQ	b2239	-0.751261	0.312201		glpQ	b2239	-0.803067	0.328282		glpQ	b2239	1.03265	0.138737			glpQ	b2239
glpR	b3423	0.740938	0.159224		glpR	b3423	0.666091	0.223809		glpR	b3423	0.00435951	0.99558			glpR	b3423	0.855115	0.0569506		glpR	b3423	0.236279	0.725187		glpR	b3423	-0.0849724	0.916006			glpR	b3423	0.615401	0.204239		glpR	b3423	0.873884	0.070919		glpR	b3423	-0.0416566	0.953654			glpR	b3423
glpT	b2240	-3.76801	1.24333e-05		glpT	b2240	-3.64525	5.36485e-05		glpT	b2240	-0.275756	0.839241			glpT	b2240	-1.624	0.0702754		glpT	b2240	-3.24302	0.000444148		glpT	b2240	-0.238304	0.868507			glpT	b2240	-2.7038	0.00176423		glpT	b2240	-2.48871	0.00754337		glpT	b2240	2.84495	0.00107707			glpT	b2240
glpX	b3925	-0.48121	0.563619		glpX	b3925	-0.342877	0.718452		glpX	b3925	-0.0870058	0.934841			glpX	b3925	0.685883	0.324465		glpX	b3925	-0.734118	0.363395		glpX	b3925	0.161827	0.872979			glpX	b3925	0.0652416	0.949387		glpX	b3925	-0.701925	0.405171		glpX	b3925	1.56528	0.0144647			glpX	b3925
glrK	b2556	-0.0602759	0.915893		glrK	b2556	-0.555847	0.2091		glrK	b2556	-0.809048	0.0273261			glrK	b2556	-0.698751	0.0645724		glrK	b2556	-0.427318	0.344333		glrK	b2556	-1.11872	0.00410054			glrK	b2556	-0.580269	0.143526		glrK	b2556	-0.620728	0.135705		glrK	b2556	-1.18657	0.00070469			glrK	b2556
glrR	b2554	0.416288	0.520658		glrR	b2554	0.0970723	0.909689		glrR	b2554	0.214898	0.758848			glrR	b2554	0.75133	0.140034		glrR	b2554	0.235531	0.758947		glrR	b2554	0.478505	0.48409			glrR	b2554	0.600831	0.281515		glrR	b2554	0.25606	0.742539		glrR	b2554	0.257	0.709697			glrR	b2554
glsA	b0485	0.734247	0.334709		glsA	b0485	1.17513	0.114271		glsA	b0485	0.77471	0.302144			glsA	b0485	0.207784	0.801561		glsA	b0485	1.14952	0.118282		glsA	b0485	1.37818	0.0486839			glsA	b0485	0.162448	0.8609		glsA	b0485	1.22515	0.0941285		glsA	b0485	0.224534	0.804081			glsA	b0485
glsB	b1524	2.09128	2.26231e-05		glsB	b1524	1.0408	0.0852506		glsB	b1524	0.885992	0.109322			glsB	b1524	2.75181	1.12309e-09		glsB	b1524	1.39024	0.0118907		glsB	b1524	0.63576	0.370931			glsB	b1524	1.60543	0.000956746		glsB	b1524	1.66783	0.00106799		glsB	b1524	0.963917	0.0840157			glsB	b1524
gltA	b0720	-1.17228	0.0470545		gltA	b0720	-0.525007	0.490485		gltA	b0720	0.913702	0.140354			gltA	b0720	-1.09035	0.0536248		gltA	b0720	-0.792672	0.241919		gltA	b0720	-0.0391157	0.972735			gltA	b0720	-0.931491	0.125812		gltA	b0720	0.634595	0.390878		gltA	b0720	1.45004	0.010572			gltA	b0720
gltB	b3212	0.158045	0.82854		gltB	b3212	0.164819	0.835099		gltB	b3212	-0.362003	0.565744			gltB	b3212	0.727347	0.157341		gltB	b3212	-0.811485	0.160977		gltB	b3212	-0.767952	0.183695			gltB	b3212	0.243361	0.72396		gltB	b3212	0.668014	0.283758		gltB	b3212	0.511237	0.38296			gltB	b3212
gltD	b3213	0.0423804	0.954058		gltD	b3213	0.312782	0.688045		gltD	b3213	-0.351307	0.608393			gltD	b3213	0.729106	0.187574		gltD	b3213	-0.912325	0.137401		gltD	b3213	-0.855199	0.167414			gltD	b3213	0.173871	0.815759		gltD	b3213	0.352686	0.653662		gltD	b3213	0.148648	0.843845			gltD	b3213
gltF	b3214	-0.661942	0.683338		gltF	b3214	-0.158875	0.94587		gltF	b3214	1.18098	0.372761			gltF	b3214	-0.42078	0.752321		gltF	b3214	2.01558	0.10209		gltF	b3214	1.01198	0.570572			gltF	b3214	-0.587178	0.650448		gltF	b3214	0.973703	0.519725		gltF	b3214	0.508103	0.762588			gltF	b3214
gltI	b0655	0.612147	0.438536		gltI	b0655	-0.818036	0.318084		gltI	b0655	-0.467887	0.568164			gltI	b0655	0.352427	0.654345		gltI	b0655	0.0430721	0.971024		gltI	b0655	-0.568017	0.490755			gltI	b0655	0.633225	0.416986		gltI	b0655	1.56032	0.0227785		gltI	b0655	0.720765	0.336732			gltI	b0655
gltJ	b0654	1.11052	0.123518		gltJ	b0654	0.209991	0.827011		gltJ	b0654	0.815406	0.260728			gltJ	b0654	1.06081	0.101256		gltJ	b0654	0.0930848	0.932028		gltJ	b0654	0.521396	0.583003			gltJ	b0654	1.38342	0.026062		gltJ	b0654	1.27511	0.0474079		gltJ	b0654	2.20707	0.000214739			gltJ	b0654
gltK	b0653	-0.531951	0.584015		gltK	b0653	-0.749915	0.380359		gltK	b0653	-0.33905	0.724939			gltK	b0653	-0.420718	0.615216		gltK	b0653	-1.12164	0.144775		gltK	b0653	0.215775	0.859885			gltK	b0653	-0.165068	0.863216		gltK	b0653	0.652622	0.436883		gltK	b0653	1.93251	0.00359717			gltK	b0653
gltL	b0652	-0.367933	0.611375		gltL	b0652	-0.287392	0.687026		gltL	b0652	0.622071	0.304103			gltL	b0652	-0.411844	0.48379		gltL	b0652	-0.726725	0.205565		gltL	b0652	0.879638	0.214461			gltL	b0652	0.0245628	0.97643		gltL	b0652	0.886611	0.0785457		gltL	b0652	1.98687	3.77266e-05			gltL	b0652
gltP	b4077	-0.578572	0.379642		gltP	b4077	-0.259059	0.74552		gltP	b4077	0.096293	0.910856			gltP	b4077	0.148302	0.830218		gltP	b4077	-0.65343	0.329245		gltP	b4077	-0.649812	0.37886			gltP	b4077	-0.213144	0.772144		gltP	b4077	-0.828487	0.194119		gltP	b4077	0.205831	0.785397			gltP	b4077
gltS	b3653	-0.356301	0.462686		gltS	b3653	-0.264898	0.639829		gltS	b3653	-0.0268981	0.968489			gltS	b3653	-0.318957	0.466057		gltS	b3653	-0.917731	0.0333935		gltS	b3653	-0.348942	0.510722			gltS	b3653	-0.754314	0.0577786		gltS	b3653	-0.344222	0.519137		gltS	b3653	-0.0024173	0.997151			gltS	b3653
gltT	b3969	4.50756	4.81676e-12		gltT	b3969	4.26812	9.79427e-12		gltT	b3969	1.945	0.00186846			gltT	b3969	5.45172	2.73526e-18		gltT	b3969	3.34597	3.30566e-07		gltT	b3969	2.44077	0.000168891			gltT	b3969	4.94097	3.11511e-15		gltT	b3969	1.88339	0.00860061		gltT	b3969	1.58255	0.0150524			gltT	b3969
gltU	b3757	2.88836	0.000512522		gltU	b3757	3.43931	3.78107e-05		gltU	b3757	0.545656	0.611483			gltU	b3757	4.45953	5.53964e-09		gltU	b3757	3.43967	4.68256e-05		gltU	b3757	1.49769	0.110998			gltU	b3757	4.0859	1.40641e-07		gltU	b3757	1.47106	0.142454		gltU	b3757	0.861663	0.380193			gltU	b3757
gltV	b4008	3.78985	9.63137e-07		gltV	b4008	3.63243	1.02558e-06		gltV	b4008	0.937116	0.27754			gltV	b4008	5.20148	5.93322e-13		gltV	b4008	3.57467	1.89489e-06		gltV	b4008	1.46533	0.0839612			gltV	b4008	5.07079	2.78291e-12		gltV	b4008	1.50495	0.0926376		gltV	b4008	1.25644	0.120386			gltV	b4008
gltW	b2590	3.45234	3.04419e-09		gltW	b2590	4.22629	3.72372e-12		gltW	b2590	1.71412	0.00317543			gltW	b2590	4.48642	2.35654e-16		gltW	b2590	3.63502	5.64146e-09		gltW	b2590	2.23271	0.000204327			gltW	b2590	4.02827	2.19058e-13		gltW	b2590	2.27774	0.000640877		gltW	b2590	1.07957	0.0929123			gltW	b2590
gltX	b2400	-0.188041	0.732787		gltX	b2400	0.00433827	0.994748		gltX	b2400	0.111815	0.849745			gltX	b2400	0.495061	0.237023		gltX	b2400	0.648453	0.154173		gltX	b2400	0.630075	0.166493			gltX	b2400	0.35482	0.462528		gltX	b2400	0.0166951	0.980809		gltX	b2400	0.119626	0.829545			gltX	b2400
gluQ	b0144	0.790368	0.0497122		gluQ	b0144	0.553228	0.228125		gluQ	b0144	0.380895	0.35698			gluQ	b0144	-0.310339	0.489837		gluQ	b0144	0.871227	0.0273227		gluQ	b0144	0.111885	0.855823			gluQ	b0144	0.514087	0.191886		gluQ	b0144	0.026683	0.968126		gluQ	b0144	-0.492632	0.244509			gluQ	b0144
glvC	b3683	0.688073	0.596664		glvC	b3683	1.21643	0.322822		glvC	b3683	0.386508	0.757436			glvC	b3683	-1.17142	0.372483		glvC	b3683	0.687604	0.602585		glvC	b3683	0.932254	0.479857			glvC	b3683	0.446814	0.705095		glvC	b3683	1.02802	0.384699		glvC	b3683	0.419708	0.745698			glvC	b3683
glvG	b3681	0.161336	0.906748		glvG	b3681	-1.17721	0.271457		glvG	b3681	-1.30622	0.131975			glvG	b3681	-0.818269	0.426255		glvG	b3681	-0.487035	0.650211		glvG	b3681	-0.313781	0.821968			glvG	b3681	-0.251564	0.820002		glvG	b3681	-0.919289	0.335664		glvG	b3681	-0.104747	0.930317			glvG	b3681
glxK	b0514	1.63946	0.00461518		glxK	b0514	0.20045	0.852407		glxK	b0514	-0.941817	0.154374			glxK	b0514	0.675404	0.290201		glxK	b0514	0.781143	0.310952		glxK	b0514	0.464568	0.577176			glxK	b0514	1.24976	0.0303344		glxK	b0514	0.650981	0.420792		glxK	b0514	-1.02368	0.143536			glxK	b0514
glxR	b0509	-1.27229	0.432331		glxR	b0509	-2.49715	0.321996		glxR	b0509	0.401128	0.794062			glxR	b0509	-1.22663	0.348034		glxR	b0509	1.0685	0.485296		glxR	b0509	1.99913	0.100915			glxR	b0509	-0.858178	0.522681		glxR	b0509	0.092038	0.965579		glxR	b0509	-0.852246	0.576973			glxR	b0509
glyA	b2551	0.612809	0.333318		glyA	b2551	0.543841	0.441527		glyA	b2551	1.19802	0.0303103			glyA	b2551	1.60266	0.00143192		glyA	b2551	-1.1051	0.0633561		glyA	b2551	0.426555	0.540197			glyA	b2551	0.488911	0.457476		glyA	b2551	-0.288396	0.732679		glyA	b2551	1.51601	0.00413876			glyA	b2551
glyQ	b3560	2.09033	1.19346e-05		glyQ	b3560	0.569069	0.387277		glyQ	b3560	0.114882	0.880487			glyQ	b3560	1.7494	0.000206951		glyQ	b3560	1.17103	0.032669		glyQ	b3560	0.459148	0.479784			glyQ	b3560	2.38367	2.31465e-07		glyQ	b3560	0.983885	0.0844603		glyQ	b3560	0.591853	0.308038			glyQ	b3560
glyS	b3559	1.26477	0.00113499		glyS	b3559	0.479971	0.350878		glyS	b3559	-0.249616	0.637127			glyS	b3559	1.43545	0.000111459		glyS	b3559	0.778598	0.0856526		glyS	b3559	-0.0161329	0.983801			glyS	b3559	1.60235	1.88929e-05		glyS	b3559	0.429085	0.421701		glyS	b3559	-0.0500296	0.935331			glyS	b3559
glyT	b3978	4.56798	1.35341e-13		glyT	b3978	2.80079	3.22456e-05		glyT	b3978	2.15913	0.00156033			glyT	b3978	5.08673	3.94224e-17		glyT	b3978	2.48474	0.000361786		glyT	b3978	3.51012	1.23792e-07			glyT	b3978	3.94004	2.10867e-10		glyT	b3978	1.15766	0.154335		glyT	b3978	1.61959	0.0229499			glyT	b3978
glyU	b2864	5.27708	0.00836231		glyU	b2864	3.34199	0.0687577		glyU	b2864	-0.597517	0.726732			glyU	b2864	2.65857	0.255011		glyU	b2864	1.5205	0.494075		glyU	b2864	-0.185075	NA			glyU	b2864	-0.129249	0.9766		glyU	b2864	2.1935	0.280577		glyU	b2864	0.473755	0.778979			glyU	b2864
glyV	b4163	2.50208	6.98181e-05		glyV	b4163	3.68536	2.68165e-09		glyV	b4163	2.02457	0.00177986			glyV	b4163	3.00182	6.2705e-07		glyV	b4163	3.93968	1.45725e-10		glyV	b4163	1.33983	0.0656099			glyV	b4163	2.3578	0.000177237		glyV	b4163	1.98791	0.00340059		glyV	b4163	1.40987	0.0372158			glyV	b4163
glyW	b1911	3.52468	0.000371713		glyW	b1911	3.9585	0.000103825		glyW	b1911	3.00399	0.00352207			glyW	b1911	3.55263	0.000231618		glyW	b1911	3.90764	0.000155321		glyW	b1911	2.66877	0.0142276			glyW	b1911	3.47795	0.000453139		glyW	b1911	1.91978	0.106406		glyW	b1911	2.81983	0.00609456			glyW	b1911
glyX	b4164	4.89799	3.55917e-14		glyX	b4164	3.94183	2.68165e-09		glyX	b4164	2.4528	0.000212258			glyX	b4164	4.96728	5.56763e-15		glyX	b4164	3.61585	6.62134e-08		glyX	b4164	2.28057	0.00130696			glyX	b4164	4.15245	1.53293e-10		glyX	b4164	2.13452	0.00336385		glyX	b4164	1.55389	0.0290809			glyX	b4164
glyY	b4165	5.61744	5.55821e-10		glyY	b4165	4.04252	8.19941e-07		glyY	b4165	2.54959	0.00065499			glyY	b4165	4.90813	4.42284e-08		glyY	b4165	3.52692	3.51025e-05		glyY	b4165	2.25164	0.00896154			glyY	b4165	4.79052	9.75861e-08		glyY	b4165	2.01516	0.0328412		glyY	b4165	1.19268	0.184851			glyY	b4165
gmd	b2053	2.18128	0.00888565		gmd	b2053	3.5312	2.73359e-05		gmd	b2053	3.5066	1.73201e-05			gmd	b2053	2.22489	0.00398802		gmd	b2053	4.36358	6.25948e-08		gmd	b2053	2.89862	0.00164405			gmd	b2053	1.79836	0.0272145		gmd	b2053	3.16103	0.000179018		gmd	b2053	1.85975	0.0454705			gmd	b2053
gmhA	b0222	-0.0354154	0.940907		gmhA	b0222	-0.366996	0.389993		gmhA	b0222	0.350383	0.364015			gmhA	b0222	0.0486645	0.916619		gmhA	b0222	-0.395838	0.32969		gmhA	b0222	-0.391197	0.368841			gmhA	b0222	-0.302719	0.4442		gmhA	b0222	-0.158722	0.760646		gmhA	b0222	0.328538	0.404222			gmhA	b0222
gmhB	b0200	0.179149	0.81934		gmhB	b0200	-0.163025	0.847787		gmhB	b0200	0.519055	0.407905			gmhB	b0200	0.241414	0.708366		gmhB	b0200	-0.429446	0.54269		gmhB	b0200	-0.646971	0.384956			gmhB	b0200	-0.151985	0.836482		gmhB	b0200	-0.089058	0.918982		gmhB	b0200	0.55971	0.369238			gmhB	b0200
gmk	b3648	0.266236	0.437621		gmk	b3648	0.333029	0.329761		gmk	b3648	0.0456152	0.914507			gmk	b3648	0.273763	0.363711		gmk	b3648	0.186265	0.620408		gmk	b3648	-0.238344	0.499429			gmk	b3648	0.100471	0.7891		gmk	b3648	-0.0836125	0.855011		gmk	b3648	0.0502976	0.900985			gmk	b3648
gmr	b1285	-0.165819	0.820825		gmr	b1285	0.148304	0.861468		gmr	b1285	-0.313076	0.636536			gmr	b1285	-0.956028	0.0541297		gmr	b1285	0.894216	0.129589		gmr	b1285	0.233208	0.750132			gmr	b1285	-0.168422	0.807653		gmr	b1285	1.32174	0.012403		gmr	b1285	-0.214085	0.761831			gmr	b1285
gnd	b2029	-0.49402	0.365756		gnd	b2029	0.148024	0.841634		gnd	b2029	0.558758	0.296342			gnd	b2029	0.507353	0.306125		gnd	b2029	0.0483338	0.956302		gnd	b2029	0.447929	0.442623			gnd	b2029	0.290424	0.627351		gnd	b2029	0.12928	0.866022		gnd	b2029	0.812436	0.0979838			gnd	b2029
gnsA	b4517	5.38881	0.0926258		gnsA	b4517	5.19295	NA		gnsA	b4517	0.327824	NA			gnsA	b4517	1.05322	0.808516		gnsA	b4517	2.5571	NA		gnsA	b4517	-0.320003	NA			gnsA	b4517	3.834	0.254488		gnsA	b4517	3.79357	NA		gnsA	b4517	-0.578481	NA			gnsA	b4517
gnsB	b1550	-1.8799	0.347278		gnsB	b1550	-0.479567	0.846898		gnsB	b1550	-1.8505	0.253142			gnsB	b1550	-5.31611	0.0102436		gnsB	b1550	2.57781	0.0797854		gnsB	b1550	0.125412	0.962877			gnsB	b1550	-2.94463	0.0565419		gnsB	b1550	-0.330035	0.888327		gnsB	b1550	0.844297	0.615706			gnsB	b1550
gntK	b3437	-0.107401	0.936518		gntK	b3437	-3.31935	0.000175147		gntK	b3437	-0.824065	0.419141			gntK	b3437	0.0470178	0.973821		gntK	b3437	-2.56998	0.00395514		gntK	b3437	-1.25664	0.264695			gntK	b3437	-0.0821847	0.952492		gntK	b3437	-3.8376	3.32944e-06		gntK	b3437	0.410942	0.718093			gntK	b3437
gntP	b4321	-0.106415	0.92147		gntP	b4321	-0.651091	0.540549		gntP	b4321	-0.386958	0.652058			gntP	b4321	-0.238298	0.781463		gntP	b4321	0.405539	0.668904		gntP	b4321	-0.107106	0.936561			gntP	b4321	-0.366381	0.662032		gntP	b4321	-0.448974	0.651696		gntP	b4321	-1.01113	0.217315			gntP	b4321
gntR	b3438	-0.917569	0.100085		gntR	b3438	0.190971	0.80618		gntR	b3438	-0.234807	0.736094			gntR	b3438	-1.13497	0.0229579		gntR	b3438	0.224464	0.775291		gntR	b3438	-0.216813	0.772874			gntR	b3438	-1.04	0.0439304		gntR	b3438	-0.0773753	0.930107		gntR	b3438	-0.373205	0.565733			gntR	b3438
gntT	b3415	-0.565201	0.336997		gntT	b3415	-0.430943	0.526757		gntT	b3415	-0.0108056	0.990232			gntT	b3415	-0.89514	0.0700068		gntT	b3415	-0.386543	0.565524		gntT	b3415	0.326598	0.630647			gntT	b3415	-0.554423	0.325538		gntT	b3415	-0.817664	0.154588		gntT	b3415	0.25481	0.698931			gntT	b3415
gntU	b4476	1.13663	0.183124		gntU	b4476	-0.900487	0.33848		gntU	b4476	0.20988	0.846836			gntU	b4476	0.670747	0.427003		gntU	b4476	-1.10057	0.210395		gntU	b4476	0.0658594	0.963042			gntU	b4476	0.848017	0.323413		gntU	b4476	-1.90348	0.0134652		gntU	b4476	0.323408	0.749653			gntU	b4476
gntX	b3413	0.0899349	0.886785		gntX	b3413	0.191317	0.744844		gntX	b3413	-0.252274	0.608319			gntX	b3413	0.399862	0.356665		gntX	b3413	0.490172	0.303018		gntX	b3413	-0.32613	0.546349			gntX	b3413	0.248115	0.619774		gntX	b3413	-0.00111182	0.998593		gntX	b3413	-0.229813	0.654744			gntX	b3413
gor	b3500	-0.006478	0.986215		gor	b3500	-0.31052	0.434404		gor	b3500	0.0864135	0.84673			gor	b3500	0.565687	0.0539794		gor	b3500	-0.551127	0.109477		gor	b3500	-0.00831984	0.990532			gor	b3500	0.23947	0.512725		gor	b3500	-0.220644	0.604776		gor	b3500	0.0379045	0.934983			gor	b3500
gph	b3385	2.02599	6.99023e-05		gph	b3385	1.08898	0.0754012		gph	b3385	0.907293	0.12568			gph	b3385	2.19789	6.83475e-06		gph	b3385	0.349279	0.650599		gph	b3385	0.314061	0.701164			gph	b3385	1.96136	9.92468e-05		gph	b3385	0.666882	0.333994		gph	b3385	0.633077	0.322169			gph	b3385
gpmA	b0755	-0.743638	0.094482		gpmA	b0755	-1.53326	0.00018071		gpmA	b0755	-0.303145	0.564664			gpmA	b0755	0.401887	0.378428		gpmA	b0755	-0.72198	0.129194		gpmA	b0755	-0.45077	0.376506			gpmA	b0755	0.125334	0.833191		gpmA	b0755	-0.66676	0.174591		gpmA	b0755	0.413537	0.403465			gpmA	b0755
gpmM	b3612	-0.688561	0.356972		gpmM	b3612	-1.8566	0.00392436		gpmM	b3612	-0.976295	0.153985			gpmM	b3612	0.228601	0.771991		gpmM	b3612	-0.549591	0.498356		gpmM	b3612	0.33051	0.704345			gpmM	b3612	-0.28155	0.745963		gpmM	b3612	-1.96175	0.00180772		gpmM	b3612	-0.563747	0.456184			gpmM	b3612
gpp	b3779	0.629312	0.0708923		gpp	b3779	0.663679	0.0619502		gpp	b3779	0.742125	0.0214192			gpp	b3779	1.0394	0.000463041		gpp	b3779	0.239694	0.58171		gpp	b3779	0.657491	0.0764989			gpp	b3779	0.764031	0.0151836		gpp	b3779	0.298088	0.487308		gpp	b3779	0.538233	0.121863			gpp	b3779
gpr	b3001	-3.56099	9.94261e-07		gpr	b3001	-1.65258	0.0579445		gpr	b3001	0.49053	0.633527			gpr	b3001	-3.35175	2.07258e-06		gpr	b3001	-1.96582	0.0188864		gpr	b3001	-0.05928	0.971032			gpr	b3001	-2.81968	0.000105972		gpr	b3001	-2.51272	0.00132508		gpr	b3001	1.91969	0.0144637			gpr	b3001
gpsA	b3608	0.152449	0.805275		gpsA	b3608	-0.249461	0.688045		gpsA	b3608	0.107979	0.863271			gpsA	b3608	0.415557	0.370375		gpsA	b3608	-1.37584	0.00156713		gpsA	b3608	-0.260599	0.656572			gpsA	b3608	0.508666	0.293921		gpsA	b3608	-0.639967	0.208999		gpsA	b3608	-0.164832	0.778952			gpsA	b3608
gpt	b0238	1.25644	0.336997		gpt	b0238	-0.613487	0.704046		gpt	b0238	0.248207	0.880639			gpt	b0238	1.27322	0.281868		gpt	b0238	1.44131	0.271825		gpt	b0238	1.40325	0.283085			gpt	b0238	0.646758	0.655632		gpt	b0238	-0.809784	0.611685		gpt	b0238	0.873396	0.521592			gpt	b0238
grcA	b2579	-5.51273	5.75889e-05		grcA	b2579	-6.11054	9.75567e-06		grcA	b2579	-6.99089	1.89417e-07			grcA	b2579	-3.58371	0.00922672		grcA	b2579	-3.22639	0.036965		grcA	b2579	-3.73606	0.0123648			grcA	b2579	-5.18605	0.000132521		grcA	b2579	-7.06776	1.78144e-07		grcA	b2579	-6.98297	1.34402e-07			grcA	b2579
greA	b3181	-0.629574	0.516936		greA	b3181	-0.308697	0.785515		greA	b3181	-0.246126	0.819545			greA	b3181	-0.755909	0.368857		greA	b3181	0.718054	0.459951		greA	b3181	-0.902016	0.323163			greA	b3181	-0.741718	0.41666		greA	b3181	-0.858658	0.377991		greA	b3181	-0.250198	0.814148			greA	b3181
greB	b3406	-0.249625	0.721289		greB	b3406	0.831571	0.0988812		greB	b3406	-0.189076	0.755389			greB	b3406	0.170987	0.764475		greB	b3406	0.076825	0.920876		greB	b3406	-0.221896	0.766706			greB	b3406	-0.104076	0.868505		greB	b3406	-0.325385	0.610054		greB	b3406	-0.421374	0.450995			greB	b3406
groL	b4143	-0.987197	0.0167586		groL	b4143	-0.249907	0.680008		groL	b4143	-0.529999	0.258631			groL	b4143	-0.0166104	0.980787		groL	b4143	0.133067	0.836608		groL	b4143	-0.174683	0.761946			groL	b4143	-0.536926	0.244921		groL	b4143	-0.668565	0.164844		groL	b4143	-0.351904	0.48311			groL	b4143
groS	b4142	-1.81983	5.75889e-05		groS	b4142	-0.989284	0.0590222		groS	b4142	-0.970877	0.0464045			groS	b4142	-0.506777	0.320703		groS	b4142	0.415595	0.494288		groS	b4142	-0.256512	0.69351			groS	b4142	-0.779205	0.119992		groS	b4142	-0.655579	0.258893		groS	b4142	-0.00297993	0.997151			groS	b4142
grpE	b2614	-2.35716	1.19492e-05		grpE	b2614	-1.99425	0.000364962		grpE	b2614	-2.29454	1.58528e-05			grpE	b2614	-0.364378	0.580352		grpE	b2614	-0.372479	0.633359		grpE	b2614	-1.40906	0.0172119			grpE	b2614	-0.810667	0.189908		grpE	b2614	-1.68975	0.00298994		grpE	b2614	-1.61334	0.00327744			grpE	b2614
grxA	b0849	-2.63167	0.0696002		grxA	b0849	-1.65331	0.222373		grxA	b0849	-0.984406	0.44229			grxA	b0849	-1.16683	0.323444		grxA	b0849	0.220329	0.897912		grxA	b0849	-0.831921	0.603734			grxA	b0849	-2.15223	0.0535629		grxA	b0849	-0.286877	0.865025		grxA	b0849	-0.635534	0.656051			grxA	b0849
grxB	b1064	-0.925756	0.0830936		grxB	b1064	-0.110911	0.893677		grxB	b1064	1.70473	0.000489261			grxB	b1064	0.153313	0.810817		grxB	b1064	-1.76525	0.000516689		grxB	b1064	0.49257	0.449173			grxB	b1064	-0.584418	0.31249		grxB	b1064	0.30861	0.684266		grxB	b1064	2.17597	3.49014e-06			grxB	b1064
grxC	b3610	-0.821004	0.15485		grxC	b3610	-0.648943	0.318084		grxC	b3610	0.11593	0.880487			grxC	b3610	-1.34007	0.00705362		grxC	b3610	-0.472662	0.478512		grxC	b3610	-0.357053	0.606949			grxC	b3610	-0.558197	0.351793		grxC	b3610	-0.0727056	0.935937		grxC	b3610	0.494154	0.421787			grxC	b3610
grxD	b1654	-0.178804	0.741179		grxD	b1654	-0.00358439	0.995646		grxD	b1654	-0.0663407	0.910557			grxD	b1654	-0.282513	0.520479		grxD	b1654	0.628427	0.140112		grxD	b1654	-0.0356412	0.957269			grxD	b1654	-0.00832872	0.991908		grxD	b1654	-0.258253	0.636499		grxD	b1654	-0.723877	0.0654664			grxD	b1654
gshA	b2688	-0.500939	0.42648		gshA	b2688	-1.07113	0.0643648		gshA	b2688	-3.36968	3.58057e-13			gshA	b2688	0.0562639	0.941975		gshA	b2688	-0.229707	0.772048		gshA	b2688	-2.62161	1.04322e-07			gshA	b2688	0.210914	0.769669		gshA	b2688	-0.630542	0.339951		gshA	b2688	-2.92042	5.20453e-10			gshA	b2688
gshB	b2947	-0.0278241	0.956768		gshB	b2947	-0.508913	0.237464		gshB	b2947	0.16964	0.714973			gshB	b2947	0.154323	0.720285		gshB	b2947	-0.655895	0.0993584		gshB	b2947	0.197748	0.69753			gshB	b2947	0.195986	0.662992		gshB	b2947	0.00719996	0.989752		gshB	b2947	0.273687	0.527252			gshB	b2947
gsiA	b0829	-0.0454483	0.943304		gsiA	b0829	0.130443	0.858055		gsiA	b0829	0.398659	0.469953			gsiA	b0829	-0.0250121	0.971997		gsiA	b0829	-0.469125	0.421997		gsiA	b0829	0.359237	0.557002			gsiA	b0829	0.291581	0.609118		gsiA	b0829	1.15975	0.0123186		gsiA	b0829	1.0169	0.0273099			gsiA	b0829
gsiB	b0830	0.268863	0.595207		gsiB	b0830	0.0362689	0.962567		gsiB	b0830	0.553086	0.227309			gsiB	b0830	0.0811605	0.87826		gsiB	b0830	-0.85016	0.064534		gsiB	b0830	0.286198	0.629162			gsiB	b0830	0.259329	0.605646		gsiB	b0830	0.93712	0.0255257		gsiB	b0830	1.01854	0.0126029			gsiB	b0830
gsiC	b0831	-0.260872	0.758311		gsiC	b0831	0.257136	0.778959		gsiC	b0831	0.569162	0.43255			gsiC	b0831	-0.431087	0.523301		gsiC	b0831	0.0083756	0.995641		gsiC	b0831	0.485635	0.576483			gsiC	b0831	-0.106669	0.900796		gsiC	b0831	0.935949	0.172818		gsiC	b0831	0.860084	0.205893			gsiC	b0831
gsiD	b0832	0.483097	0.499414		gsiD	b0832	-0.25065	0.807842		gsiD	b0832	-0.0288773	0.979602			gsiD	b0832	-0.730589	0.245281		gsiD	b0832	-1.2433	0.106454		gsiD	b0832	-3.32162	0.0919563			gsiD	b0832	-0.214261	0.776399		gsiD	b0832	-0.0247107	0.98099		gsiD	b0832	0.499985	0.527881			gsiD	b0832
gsk	b0477	0.306105	0.713899		gsk	b0477	0.700714	0.355433		gsk	b0477	0.663235	0.343913			gsk	b0477	0.981555	0.104108		gsk	b0477	0.873603	0.21353		gsk	b0477	0.781504	0.286037			gsk	b0477	0.452432	0.544908		gsk	b0477	0.264611	0.784109		gsk	b0477	0.69359	0.314352			gsk	b0477
gspA	b3323	2.27413	0.0347149		gspA	b3323	0.927356	0.502034		gspA	b3323	-0.827688	0.436759			gspA	b3323	0.938663	0.442719		gspA	b3323	1.38467	0.232509		gspA	b3323	-0.780835	0.582438			gspA	b3323	0.972218	0.426091		gspA	b3323	1.30532	0.264597		gspA	b3323	-0.900932	0.423379			gspA	b3323
gspB	b3322	-1.32932	0.4021		gspB	b3322	0.226413	0.902239		gspB	b3322	-1.40688	0.137104			gspB	b3322	-1.32695	0.2694		gspB	b3322	0.757358	0.561709		gspB	b3322	-2.22555	0.189502			gspB	b3322	-1.68943	0.110488		gspB	b3322	1.10884	0.345956		gspB	b3322	-0.979296	0.351788			gspB	b3322
gspC	b3324	2.3622	0.119977		gspC	b3324	0.660204	0.704046		gspC	b3324	0.271591	0.859371			gspC	b3324	-0.189899	0.941329		gspC	b3324	0.566351	0.745797		gspC	b3324	0.112286	0.957269			gspC	b3324	1.7927	0.213122		gspC	b3324	1.40502	0.305728		gspC	b3324	0.161668	0.92016			gspC	b3324
gspD	b3325	0.176059	0.883151		gspD	b3325	0.523034	0.606332		gspD	b3325	-0.329417	0.722113			gspD	b3325	0.428016	0.606335		gspD	b3325	0.568394	0.533976		gspD	b3325	0.366789	0.737643			gspD	b3325	-0.079471	0.941155		gspD	b3325	0.80075	0.339951		gspD	b3325	0.322399	0.728642			gspD	b3325
gspE	b3326	0.27124	0.870377		gspE	b3326	0.41783	0.764559		gspE	b3326	-0.0619054	0.967069			gspE	b3326	0.582398	0.609144		gspE	b3326	0.693413	0.556107		gspE	b3326	-1.35908	0.465406			gspE	b3326	1.02607	0.303101		gspE	b3326	0.114823	0.941051		gspE	b3326	0.277297	0.82693			gspE	b3326
gspF	b3327	0.286377	0.799751		gspF	b3327	-0.699463	0.440288		gspF	b3327	0.0281226	0.980246			gspF	b3327	-0.160143	0.870167		gspF	b3327	-0.511531	0.543099		gspF	b3327	0.0971381	0.942289			gspF	b3327	0.110684	0.909605		gspF	b3327	-0.189985	0.850276		gspF	b3327	0.204304	0.825946			gspF	b3327
gspG	b3328	-0.135509	0.953731		gspG	b3328	-1.06093	NA		gspG	b3328	-1.25587	NA			gspG	b3328	-1.33641	0.495798		gspG	b3328	0.338279	NA		gspG	b3328	-0.467337	NA			gspG	b3328	-2.29618	0.218873		gspG	b3328	1.19142	NA		gspG	b3328	-0.755481	NA			gspG	b3328
gspH	b3329	0.0846486	0.967901		gspH	b3329	0.51408	0.846109		gspH	b3329	0.1032	NA			gspH	b3329	-0.472104	0.817244		gspH	b3329	-0.128952	0.967531		gspH	b3329	0.558455	NA			gspH	b3329	-0.661131	0.745202		gspH	b3329	-1.04269	0.677408		gspH	b3329	2.08293	0.218791			gspH	b3329
gspI	b3330	0.71233	0.809326		gspI	b3330	-0.638416	NA		gspI	b3330	-1.09425	NA			gspI	b3330	-0.104028	0.974796		gspI	b3330	-0.197174	NA		gspI	b3330	-2.73855	NA			gspI	b3330	0.295571	0.909173		gspI	b3330	-0.0486169	NA		gspI	b3330	-1.71446	NA			gspI	b3330
gspJ	b3331	1.3531	0.226361		gspJ	b3331	-0.42022	0.785266		gspJ	b3331	0.0429365	0.979602			gspJ	b3331	1.17081	0.231433		gspJ	b3331	0.18827	0.897912		gspJ	b3331	0.742485	0.599844			gspJ	b3331	0.29215	0.819319		gspJ	b3331	0.271181	0.847597		gspJ	b3331	0.253058	0.853473			gspJ	b3331
gspK	b3332	0.168305	0.896456		gspK	b3332	-0.574756	0.585874		gspK	b3332	-0.069294	0.951541			gspK	b3332	0.0288988	0.982485		gspK	b3332	-0.288454	0.786069		gspK	b3332	-0.24949	0.8448			gspK	b3332	-0.611058	0.507658		gspK	b3332	-0.32873	0.757742		gspK	b3332	-1.01715	0.227278			gspK	b3332
gspL	b3333	0.73739	0.37582		gspL	b3333	0.395558	0.68405		gspL	b3333	0.373955	0.634123			gspL	b3333	0.677981	0.343242		gspL	b3333	0.483011	0.575318		gspL	b3333	-0.564885	0.593306			gspL	b3333	0.115638	0.902797		gspL	b3333	0.678875	0.390969		gspL	b3333	0.829011	0.225892			gspL	b3333
gspM	b3334	-1.44269	0.487824		gspM	b3334	0.00457213	0.998181		gspM	b3334	-0.651759	0.624269			gspM	b3334	-1.49061	0.348195		gspM	b3334	0.2726	0.880412		gspM	b3334	-1.13517	0.450312			gspM	b3334	-0.410034	0.796373		gspM	b3334	-0.80685	0.611866		gspM	b3334	-1.47479	0.227278			gspM	b3334
gspO	b3335	-0.621458	0.364302		gspO	b3335	1.47983	0.0099994		gspO	b3335	0.597561	0.342407			gspO	b3335	-1.78124	0.00123748		gspO	b3335	1.13911	0.0611788		gspO	b3335	-0.0929341	0.918607			gspO	b3335	-1.33738	0.0151014		gspO	b3335	0.657551	0.345956		gspO	b3335	-0.599866	0.348559			gspO	b3335
gss	b2988	0.577162	0.131186		gss	b2988	-0.0807986	0.883648		gss	b2988	-0.274971	0.53657			gss	b2988	0.990804	0.00159335		gss	b2988	-0.938336	0.00948647		gss	b2988	0.0636492	0.925047			gss	b2988	0.777371	0.018284		gss	b2988	-0.252757	0.591848		gss	b2988	1.1499	0.00060766			gss	b2988
gstA	b1635	-1.47829	0.0015703		gstA	b1635	-0.0129427	0.988885		gstA	b1635	0.65378	0.22443			gstA	b1635	-1.82005	3.33359e-05		gstA	b1635	0.231747	0.747157		gstA	b1635	1.43109	0.0034397			gstA	b1635	-1.34562	0.00323936		gstA	b1635	1.29154	0.00808447		gstA	b1635	1.52687	0.000827513			gstA	b1635
gstB	b0838	0.921069	0.0153242		gstB	b0838	0.864267	0.0382653		gstB	b0838	0.952305	0.0133445			gstB	b0838	0.927002	0.00990674		gstB	b0838	0.606258	0.178271		gstB	b0838	1.02641	0.0133776			gstB	b0838	0.614572	0.123539		gstB	b0838	1.32425	0.000393909		gstB	b0838	0.903127	0.0201836			gstB	b0838
gtrA	b2350	1.71613	0.0283209		gtrA	b2350	2.5604	0.000551336		gtrA	b2350	2.21842	0.00100146			gtrA	b2350	1.4902	0.0381663		gtrA	b2350	2.61207	0.000380706		gtrA	b2350	1.43665	0.131031			gtrA	b2350	2.15956	0.000727487		gtrA	b2350	3.31057	9.10559e-07		gtrA	b2350	2.7576	2.56582e-05			gtrA	b2350
gtrB	b2351	2.54641	0.000102058		gtrB	b2351	2.38787	0.000982022		gtrB	b2351	2.31387	0.000727349			gtrB	b2351	2.26521	0.000348074		gtrB	b2351	2.10276	0.00518268		gtrB	b2351	1.37561	0.141736			gtrB	b2351	2.23351	0.000419949		gtrB	b2351	2.22276	0.00164581		gtrB	b2351	1.87849	0.00970034			gtrB	b2351
gtrS	b2352	-0.42123	0.754149		gtrS	b2352	2.87151	0.00199493		gtrS	b2352	-0.180832	0.890065			gtrS	b2352	-1.15949	0.250418		gtrS	b2352	1.52854	0.165632		gtrS	b2352	-1.69463	0.341048			gtrS	b2352	-0.431678	0.687883		gtrS	b2352	0.439346	0.777279		gtrS	b2352	0.718109	0.488459			gtrS	b2352
guaA	b2507	1.2278	0.0330834		guaA	b2507	0.116333	0.902906		guaA	b2507	1.45593	0.0107406			guaA	b2507	1.89221	0.000281271		guaA	b2507	0.112535	0.905079		guaA	b2507	2.17087	9.32475e-05			guaA	b2507	0.766916	0.221217		guaA	b2507	0.206134	0.827209		guaA	b2507	1.50507	0.00742431			guaA	b2507
guaB	b2508	1.90717	0.00831863		guaB	b2508	1.45813	0.0751159		guaB	b2508	2.17726	0.00262628			guaB	b2508	2.89624	1.29415e-05		guaB	b2508	1.12529	0.188648		guaB	b2508	3.01841	2.13915e-05			guaB	b2508	1.37432	0.0712346		guaB	b2508	1.54626	0.0542761		guaB	b2508	2.19817	0.00200227			guaB	b2508
guaC	b0104	0.24286	0.805512		guaC	b0104	-0.389854	0.692172		guaC	b0104	0.325124	0.725502			guaC	b0104	0.639284	0.38838		guaC	b0104	0.0390684	0.975501		guaC	b0104	0.418031	0.654056			guaC	b0104	1.04354	0.152508		guaC	b0104	0.505795	0.603032		guaC	b0104	1.07262	0.142887			guaC	b0104
guaD	b2883	0.692598	0.571792		guaD	b2883	0.039802	0.981041		guaD	b2883	-0.464925	0.690547			guaD	b2883	0.723238	0.486817		guaD	b2883	1.11882	0.280139		guaD	b2883	0.0379865	0.983396			guaD	b2883	0.551002	0.636678		guaD	b2883	2.7293	0.00119505		guaD	b2883	0.707671	0.509331			guaD	b2883
gudD	b2787	-0.255246	0.695474		gudD	b2787	-0.152529	0.846371		gudD	b2787	-1.05077	0.0190116			gudD	b2787	-0.224444	0.686259		gudD	b2787	0.292175	0.651057		gudD	b2787	-0.914429	0.121003			gudD	b2787	-0.288087	0.606866		gudD	b2787	0.194402	0.787768		gudD	b2787	-1.05132	0.0254918			gudD	b2787
gudP	b2789	-1.11593	0.336997		gudP	b2789	0.241001	0.855545		gudP	b2789	-0.0560093	0.968489			gudP	b2789	-1.93894	0.0471428		gudP	b2789	-0.408144	0.741328		gudP	b2789	0.318591	0.833311			gudP	b2789	-1.94212	0.0212046		gudP	b2789	0.0769647	0.956737		gudP	b2789	-0.00719979	0.995817			gudP	b2789
gudX	b2788	0.0977956	0.935264		gudX	b2788	-0.621195	0.571178		gudX	b2788	-0.372319	0.714807			gudX	b2788	-0.493672	0.606335		gudX	b2788	-0.34571	0.765144		gudX	b2788	0.742415	0.461214			gudX	b2788	-0.300485	0.772999		gudX	b2788	-0.281752	0.813127		gudX	b2788	0.0822104	0.944441			gudX	b2788
gyrA	b2231	1.25276	0.000190028		gyrA	b2231	1.05454	0.00367299		gyrA	b2231	0.819574	0.02328			gyrA	b2231	1.78187	1.97087e-08		gyrA	b2231	0.300311	0.517702		gyrA	b2231	0.354967	0.422773			gyrA	b2231	1.5802	1.08447e-06		gyrA	b2231	-0.0906027	0.878824		gyrA	b2231	0.154764	0.751292			gyrA	b2231
gyrB	b3699	0.364152	0.50808		gyrB	b3699	-0.220546	0.735563		gyrB	b3699	0.0476076	0.94997			gyrB	b3699	0.63258	0.165326		gyrB	b3699	-0.0888382	0.90422		gyrB	b3699	-0.046822	0.950458			gyrB	b3699	0.544836	0.279467		gyrB	b3699	-0.741184	0.147376		gyrB	b3699	-0.542449	0.278269			gyrB	b3699
hcaB	b2541	-0.790326	0.375367		hcaB	b2541	-0.237565	0.796001		hcaB	b2541	-0.528943	0.436702			hcaB	b2541	-0.611506	0.405528		hcaB	b2541	0.113769	0.909842		hcaB	b2541	-0.167206	0.860619			hcaB	b2541	-0.37618	0.632525		hcaB	b2541	-0.224275	0.812579		hcaB	b2541	-0.700218	0.296121			hcaB	b2541
hcaC	b2540	0.235238	0.869633		hcaC	b2540	-3.04622	0.0106668		hcaC	b2540	-0.806715	0.376063			hcaC	b2540	-0.0932218	0.943549		hcaC	b2540	-0.495975	0.657025		hcaC	b2540	-0.212063	0.872231			hcaC	b2540	-0.478786	0.673981		hcaC	b2540	-0.343006	0.780256		hcaC	b2540	-0.409382	0.696921			hcaC	b2540
hcaD	b2542	0.606154	0.375367		hcaD	b2542	-0.815776	0.245726		hcaD	b2542	-0.702525	0.241398			hcaD	b2542	-0.491129	0.456274		hcaD	b2542	-0.223373	0.790447		hcaD	b2542	-0.578593	0.421239			hcaD	b2542	-0.123277	0.879421		hcaD	b2542	-0.375086	0.63414		hcaD	b2542	-1.02446	0.075731			hcaD	b2542
hcaE	b2538	0.344966	0.582935		hcaE	b2538	-0.862584	0.119381		hcaE	b2538	-0.913513	0.059141			hcaE	b2538	-0.197193	0.748069		hcaE	b2538	-0.243913	0.72565		hcaE	b2538	-0.750451	0.175873			hcaE	b2538	-0.176673	0.788837		hcaE	b2538	0.0466222	0.95672		hcaE	b2538	-0.706197	0.167658			hcaE	b2538
hcaF	b2539	0.415706	0.728064		hcaF	b2539	-0.312108	0.753454		hcaF	b2539	-0.682771	0.342354			hcaF	b2539	0.0341453	0.980373		hcaF	b2539	0.0678403	0.955542		hcaF	b2539	-0.167849	0.87524			hcaF	b2539	0.228245	0.825032		hcaF	b2539	0.112009	0.917082		hcaF	b2539	-0.214998	0.806638			hcaF	b2539
hcaR	b2537	-0.295687	0.842885		hcaR	b2537	0.366892	0.818264		hcaR	b2537	3.54929	0.000462688			hcaR	b2537	-1.02078	0.357825		hcaR	b2537	1.74076	0.135257		hcaR	b2537	3.45062	0.00116802			hcaR	b2537	0.267655	0.851981		hcaR	b2537	0.379542	0.823264		hcaR	b2537	4.79836	6.77879e-07			hcaR	b2537
hcaT	b2536	-2.28658	0.00155867		hcaT	b2536	-0.457331	0.669661		hcaT	b2536	-0.120735	0.916002			hcaT	b2536	-2.81375	3.33359e-05		hcaT	b2536	-0.841424	0.354697		hcaT	b2536	0.778045	0.387359			hcaT	b2536	-2.35589	0.000604855		hcaT	b2536	-1.04288	0.241603		hcaT	b2536	0.343243	0.727498			hcaT	b2536
hchA	b1967	-1.8271	0.00134869		hchA	b1967	-0.896589	0.188641		hchA	b1967	-0.244084	0.758541			hchA	b1967	-2.09094	9.53548e-05		hchA	b1967	-1.58246	0.00838187		hchA	b1967	-0.352445	0.655547			hchA	b1967	-1.41254	0.0124905		hchA	b1967	-0.881584	0.192189		hchA	b1967	-0.341303	0.648274			hchA	b1967
hcp	b0873	0.0896191	0.943201		hcp	b0873	-2.59725	0.00498584		hcp	b0873	-2.02112	0.00779131			hcp	b0873	-0.838694	0.392407		hcp	b0873	-1.42649	0.10209		hcp	b0873	-0.617046	0.55312			hcp	b0873	-1.24898	0.167901		hcp	b0873	-1.96586	0.0124066		hcp	b0873	-1.76359	0.0284292			hcp	b0873
hcr	b0872	-0.760895	0.55967		hcr	b0872	-2.33564	0.0141284		hcr	b0872	-1.89049	0.0131683			hcr	b0872	-1.05011	0.302832		hcr	b0872	-1.98252	0.0189906		hcr	b0872	-1.38521	0.19536			hcr	b0872	-1.19643	0.195473		hcr	b0872	-1.59223	0.0485113		hcr	b0872	-3.26415	0.000366676			hcr	b0872
hda	b2496	0.714705	0.307908		hda	b2496	-0.305429	0.721225		hda	b2496	-0.373393	0.623243			hda	b2496	1.11632	0.0534335		hda	b2496	-0.287476	0.74073		hda	b2496	-0.788207	0.313738			hda	b2496	0.664188	0.322069		hda	b2496	-0.954814	0.153409		hda	b2496	-0.3667	0.63726			hda	b2496
hdeA	b3510	0.44529	0.356566		hdeA	b3510	-0.00481538	0.994418		hdeA	b3510	0.122073	0.841487			hdeA	b3510	0.589579	0.163335		hdeA	b3510	0.685489	0.143816		hdeA	b3510	-0.359137	0.484558			hdeA	b3510	-0.00799492	0.993174		hdeA	b3510	0.901652	0.0431809		hdeA	b3510	0.966511	0.0187883			hdeA	b3510
hdeB	b3509	-0.78524	0.231702		hdeB	b3509	-0.0587675	0.955917		hdeB	b3509	0.836537	0.192901			hdeB	b3509	-0.862582	0.145442		hdeB	b3509	0.131624	0.889653		hdeB	b3509	0.500357	0.4904			hdeB	b3509	-1.01107	0.0965104		hdeB	b3509	1.11854	0.0838275		hdeB	b3509	1.35788	0.0191109			hdeB	b3509
hdeD	b3511	-1.05132	0.0340326		hdeD	b3511	-0.699889	0.226717		hdeD	b3511	-0.630815	0.244148			hdeD	b3511	-1.57765	0.000434773		hdeD	b3511	-0.175495	0.810709		hdeD	b3511	-0.347225	0.577238			hdeD	b3511	-1.6209	0.000353128		hdeD	b3511	-0.127662	0.871834		hdeD	b3511	-0.2476	0.696953			hdeD	b3511
hdfR	b4480	-0.68421	0.221525		hdfR	b4480	0.401871	0.544489		hdfR	b4480	0.519334	0.353432			hdfR	b4480	0.00975191	0.990795		hdfR	b4480	-0.44005	0.492931		hdfR	b4480	-0.0635443	0.945697			hdfR	b4480	-0.485467	0.369929		hdfR	b4480	0.34127	0.61645		hdfR	b4480	0.921826	0.0675388			hdfR	b4480
hdhA	b1619	-1.33738	0.0100605		hdhA	b1619	0.267185	0.72894		hdhA	b1619	1.08451	0.0460599			hdhA	b1619	-1.74803	0.000300093		hdhA	b1619	-0.44641	0.515127		hdhA	b1619	-0.450211	0.512516			hdhA	b1619	-0.848874	0.127224		hdhA	b1619	0.0480527	0.959718		hdhA	b1619	0.465843	0.465107			hdhA	b1619
helD	b0962	-0.876582	0.00323564		helD	b0962	-0.725461	0.0195496		helD	b0962	-0.466387	0.122688			helD	b0962	-0.248378	0.424061		helD	b0962	-0.838407	0.00512733		helD	b0962	-0.4147	0.27812			helD	b0962	-0.253752	0.437809		helD	b0962	-0.0813018	0.859054		helD	b0962	-0.311928	0.352822			helD	b0962
hemA	b1210	0.926875	0.0489136		hemA	b1210	2.0263	1.92339e-06		hemA	b1210	1.83732	1.48573e-05			hemA	b1210	0.954565	0.0295821		hemA	b1210	1.68129	0.000156347		hemA	b1210	1.42079	0.00226662			hemA	b1210	0.894207	0.0515027		hemA	b1210	1.21747	0.00842428		hemA	b1210	1.12285	0.0131808			hemA	b1210
hemB	b0369	0.953681	0.0939068		hemB	b0369	0.299903	0.693535		hemB	b0369	1.32764	0.012435			hemB	b0369	2.10436	9.14694e-06		hemB	b0369	-0.0147201	0.989454		hemB	b0369	1.65523	0.00231857			hemB	b0369	1.32557	0.00987294		hemB	b0369	0.0380703	0.967946		hemB	b0369	1.18331	0.0284613			hemB	b0369
hemC	b3805	0.377553	0.4021		hemC	b3805	0.412916	0.388657		hemC	b3805	0.935103	0.0137671			hemC	b3805	0.47198	0.227722		hemC	b3805	-0.355262	0.466479		hemC	b3805	0.724803	0.10202			hemC	b3805	0.138734	0.785993		hemC	b3805	-0.086236	0.890119		hemC	b3805	0.896707	0.01951			hemC	b3805
hemD	b3804	-0.160927	0.805275		hemD	b3804	0.138363	0.847787		hemD	b3804	0.480341	0.362252			hemD	b3804	-0.135202	0.810817		hemD	b3804	0.152034	0.829038		hemD	b3804	0.320305	0.61278			hemD	b3804	-0.166941	0.783208		hemD	b3804	0.171664	0.812591		hemD	b3804	0.606912	0.228873			hemD	b3804
hemE	b3997	0.902592	0.000602567		hemE	b3997	0.285814	0.429812		hemE	b3997	0.499923	0.0839473			hemE	b3997	1.01644	4.15454e-05		hemE	b3997	-0.201267	0.597715		hemE	b3997	0.345721	0.319388			hemE	b3997	0.930887	0.000240981		hemE	b3997	0.46864	0.132468		hemE	b3997	0.65869	0.0172421			hemE	b3997
hemF	b2436	0.429611	0.552723		hemF	b2436	-0.000197712	0.99986		hemF	b2436	-0.97954	0.0648882			hemF	b2436	-0.174284	0.808516		hemF	b2436	0.152418	0.852883		hemF	b2436	0.0694416	0.941609			hemF	b2436	0.659077	0.240962		hemF	b2436	-0.330229	0.654476		hemF	b2436	-0.327896	0.621898			hemF	b2436
hemG	b3850	1.43075	0.00350738		hemG	b3850	0.777	0.202389		hemG	b3850	0.792613	0.132169			hemG	b3850	1.67195	0.000204522		hemG	b3850	0.289492	0.69257		hemG	b3850	0.473188	0.479857			hemG	b3850	1.19658	0.0125877		hemG	b3850	1.0467	0.0513289		hemG	b3850	0.468621	0.435299			hemG	b3850
hemH	b0475	-1.38778	0.00206001		hemH	b0475	-0.395645	0.543183		hemH	b0475	-0.77765	0.11833			hemH	b0475	-1.23892	0.00275872		hemH	b0475	-0.620242	0.272046		hemH	b0475	-0.801359	0.228555			hemH	b0475	-0.986221	0.0201385		hemH	b0475	-0.141237	0.850276		hemH	b0475	-0.505538	0.365896			hemH	b0475
hemL	b0154	-0.213545	0.683338		hemL	b0154	-0.466484	0.337452		hemL	b0154	-0.569343	0.17586			hemL	b0154	0.480019	0.232634		hemL	b0154	-0.479444	0.306439		hemL	b0154	-0.197002	0.718725			hemL	b0154	0.269719	0.577768		hemL	b0154	-0.625833	0.157312		hemL	b0154	-0.48633	0.261911			hemL	b0154
hemN	b3867	0.242805	0.651682		hemN	b3867	0.382585	0.462835		hemN	b3867	0.165546	0.757162			hemN	b3867	0.33927	0.442286		hemN	b3867	0.302207	0.567771		hemN	b3867	0.32996	0.514432			hemN	b3867	0.198525	0.704653		hemN	b3867	0.457687	0.352898		hemN	b3867	-0.12941	0.814783			hemN	b3867
hemX	b3803	0.244659	0.6542		hemX	b3803	0.440371	0.419395		hemX	b3803	0.721018	0.107866			hemX	b3803	0.0322974	0.957289		hemX	b3803	-0.271811	0.643482		hemX	b3803	0.221112	0.717183			hemX	b3803	0.385036	0.438757		hemX	b3803	0.188745	0.777957		hemX	b3803	0.543763	0.251514			hemX	b3803
hemY	b3802	0.0596533	0.909898		hemY	b3802	0.14183	0.78807		hemY	b3802	0.249004	0.574311			hemY	b3802	0.199817	0.629448		hemY	b3802	-0.304365	0.51037		hemY	b3802	0.169898	0.738564			hemY	b3802	0.500225	0.186253		hemY	b3802	-0.175027	0.75511		hemY	b3802	0.173377	0.71752			hemY	b3802
hflC	b4175	1.435	6.56239e-07		hflC	b4175	0.517286	0.164329		hflC	b4175	-0.405049	0.255652			hflC	b4175	1.60333	8.66271e-09		hflC	b4175	0.248681	0.552333		hflC	b4175	-0.668653	0.0529248			hflC	b4175	1.42354	5.30515e-07		hflC	b4175	-0.49522	0.182308		hflC	b4175	-1.0587	0.000428281			hflC	b4175
hflD	b1132	0.915969	0.247116		hflD	b1132	1.06074	0.191099		hflD	b1132	1.10443	0.139618			hflD	b1132	1.23346	0.0705756		hflD	b1132	0.398277	0.681932		hflD	b1132	1.32928	0.0879873			hflD	b1132	0.602104	0.472233		hflD	b1132	-0.164368	0.887032		hflD	b1132	1.06575	0.159623			hflD	b1132
hflK	b4174	1.43814	1.07852e-05		hflK	b4174	0.934877	0.0108692		hflK	b4174	0.0557878	0.919309			hflK	b4174	1.51328	1.85173e-06		hflK	b4174	0.458324	0.278509		hflK	b4174	-0.169983	0.72981			hflK	b4174	1.28388	9.64949e-05		hflK	b4174	0.107781	0.85506		hflK	b4174	-0.393593	0.332897			hflK	b4174
hflX	b4173	0.419373	0.33686		hflX	b4173	0.616099	0.157069		hflX	b4173	-0.0294766	0.961191			hflX	b4173	0.0545144	0.916832		hflX	b4173	0.410067	0.374494		hflX	b4173	-0.728364	0.0753223			hflX	b4173	0.137647	0.788825		hflX	b4173	-0.207103	0.717543		hflX	b4173	-0.663835	0.0900677			hflX	b4173
hfq	b4172	-1.63677	0.000466868		hfq	b4172	-0.874204	0.120949		hfq	b4172	-0.898148	0.0827891			hfq	b4172	-2.22159	5.745e-07		hfq	b4172	-0.625921	0.288319		hfq	b4172	-1.65133	0.00082356			hfq	b4172	-1.98838	1.09202e-05		hfq	b4172	-1.20163	0.0196441		hfq	b4172	-0.997267	0.047081			hfq	b4172
hha	b0460	-2.23338	0.051363		hha	b0460	-1.31599	0.201459		hha	b0460	-0.396095	0.731378			hha	b0460	-1.2499	0.19479		hha	b0460	-0.0720285	0.96486		hha	b0460	-0.0463334	0.977477			hha	b0460	-1.75368	0.0569798		hha	b0460	0.197622	0.88836		hha	b0460	0.528593	0.627387			hha	b0460
hicA	b4532	-0.156841	0.892077		hicA	b4532	-1.16604	0.205964		hicA	b4532	0.0494975	0.966433			hicA	b4532	0.996606	0.154585		hicA	b4532	0.407339	0.674326		hicA	b4532	0.422461	0.685098			hicA	b4532	1.02669	0.152843		hicA	b4532	-0.849641	0.330529		hicA	b4532	-0.313215	0.751292			hicA	b4532
hicB	b1438	-0.190087	0.878957		hicB	b1438	-1.72549	0.0814835		hicB	b1438	-0.40206	0.688667			hicB	b1438	-0.0912153	0.935751		hicB	b1438	0.0565308	0.967531		hicB	b1438	-0.0139624	0.991732			hicB	b1438	-0.423194	0.659023		hicB	b1438	-0.867661	0.348204		hicB	b1438	-0.179493	0.87611			hicB	b1438
higA	b3082	-1.33553	0.169954		higA	b3082	-0.143065	0.928071		higA	b3082	0.144013	0.912661			higA	b3082	-2.79049	0.00180544		higA	b3082	1.20024	0.227767		higA	b3082	2.50856	0.00269443			higA	b3082	-1.5752	0.0443268		higA	b3082	0.803237	0.467269		higA	b3082	1.15689	0.206355			higA	b3082
higB	b3083	-1.23468	0.649702		higB	b3083	-0.728879	0.79041		higB	b3083	0.604743	NA			higB	b3083	-2.17609	0.343382		higB	b3083	1.47549	0.427705		higB	b3083	1.62057	NA			higB	b3083	-0.0563757	0.982587		higB	b3083	1.47124	0.430799		higB	b3083	1.2319	0.498391			higB	b3083
hinT	b1103	-1.19269	0.0113601		hinT	b1103	-0.824263	0.142612		hinT	b1103	-0.500011	0.367574			hinT	b1103	-1.61566	0.000193982		hinT	b1103	-0.703695	0.210643		hinT	b1103	-1.17439	0.03239			hinT	b1103	-1.05869	0.0223744		hinT	b1103	-0.171004	0.827209		hinT	b1103	-0.578874	0.284955			hinT	b1103
hipA	b1507	-1.69555	0.00358846		hipA	b1507	-0.637987	0.402576		hipA	b1507	-0.254008	0.735264			hipA	b1507	-1.58475	0.00251619		hipA	b1507	-0.426643	0.580885		hipA	b1507	-1.16974	0.126218			hipA	b1507	-1.03696	0.0570907		hipA	b1507	0.427524	0.577149		hipA	b1507	0.0892318	0.914492			hipA	b1507
hipB	b1508	-1.85412	0.00387679		hipB	b1508	-1.06941	0.195069		hipB	b1508	-0.161205	0.863553			hipB	b1508	-2.48687	2.31393e-05		hipB	b1508	-2.03702	0.00459818		hipB	b1508	-0.999296	0.37886			hipB	b1508	-1.80035	0.000880365		hipB	b1508	-0.241589	0.80216		hipB	b1508	-0.336998	0.712341			hipB	b1508
hisA	b2024	-0.574353	0.388314		hisA	b2024	-0.139287	0.877715		hisA	b2024	-0.0878361	0.916845			hisA	b2024	-0.421307	0.486108		hisA	b2024	-0.612155	0.374742		hisA	b2024	-0.740654	0.330759			hisA	b2024	-0.381672	0.565587		hisA	b2024	0.505081	0.47656		hisA	b2024	-0.127405	0.8756			hisA	b2024
hisB	b2022	-0.367299	0.576507		hisB	b2022	0.517632	0.435786		hisB	b2022	0.402924	0.518372			hisB	b2022	-0.010131	0.990795		hisB	b2022	-0.0423009	0.966388		hisB	b2022	0.338735	0.636583			hisB	b2022	-0.178963	0.792447		hisB	b2022	0.672745	0.276016		hisB	b2022	0.745331	0.180223			hisB	b2022
hisC	b2021	-0.496723	0.484247		hisC	b2021	0.332644	0.688045		hisC	b2021	0.443853	0.528893			hisC	b2021	-0.433433	0.497925		hisC	b2021	-0.0561171	0.959614		hisC	b2021	0.743862	0.283987			hisC	b2021	-0.719871	0.250958		hisC	b2021	0.591837	0.420486		hisC	b2021	0.620836	0.348119			hisC	b2021
hisD	b2020	-0.787031	0.148548		hisD	b2020	-0.196639	0.785266		hisD	b2020	0.124342	0.859371			hisD	b2020	-0.594624	0.244078		hisD	b2020	-0.871617	0.113512		hisD	b2020	0.0734134	0.929836			hisD	b2020	-0.915333	0.0624659		hisD	b2020	0.121422	0.876968		hisD	b2020	0.552052	0.312022			hisD	b2020
hisF	b2025	-0.75334	0.226477		hisF	b2025	0.563079	0.39873		hisF	b2025	0.100752	0.901359			hisF	b2025	0.0528137	0.943378		hisF	b2025	-0.29134	0.701772		hisF	b2025	-0.39222	0.609169			hisF	b2025	0.0150601	0.988376		hisF	b2025	0.361937	0.62593		hisF	b2025	0.575009	0.337586			hisF	b2025
hisG	b2019	-0.152469	0.857417		hisG	b2019	-0.161016	0.852814		hisG	b2019	0.0596013	0.948085			hisG	b2019	0.263831	0.692713		hisG	b2019	-0.162602	0.851909		hisG	b2019	-0.12447	0.88887			hisG	b2019	0.0267777	0.977154		hisG	b2019	0.350046	0.655107		hisG	b2019	0.586255	0.348704			hisG	b2019
hisH	b2023	-0.303257	0.687653		hisH	b2023	0.169321	0.847787		hisH	b2023	-0.258313	0.726951			hisH	b2023	-0.367137	0.557602		hisH	b2023	-0.538667	0.459951		hisH	b2023	-1.35142	0.0849027			hisH	b2023	-0.526039	0.402307		hisH	b2023	0.187667	0.832186		hisH	b2023	-0.12278	0.880453			hisH	b2023
hisI	b2026	-0.891417	0.125638		hisI	b2026	0.377092	0.592893		hisI	b2026	0.168755	0.810423			hisI	b2026	-0.795803	0.12346		hisI	b2026	0.0883173	0.918566		hisI	b2026	-0.227061	0.771504			hisI	b2026	-0.744093	0.160692		hisI	b2026	0.285842	0.705397		hisI	b2026	-0.0067125	0.993696			hisI	b2026
hisJ	b2309	0.266375	0.805747		hisJ	b2309	-1.19792	0.182909		hisJ	b2309	-1.32489	0.0985581			hisJ	b2309	-1.13093	0.142346		hisJ	b2309	0.28841	0.800481		hisJ	b2309	-0.903416	0.328312			hisJ	b2309	0.33783	0.744864		hisJ	b2309	1.29572	0.13037		hisJ	b2309	0.593354	0.520796			hisJ	b2309
hisL	b2018	2.25472	0.026506		hisL	b2018	1.6091	0.167091		hisL	b2018	-0.982108	0.399012			hisL	b2018	0.860326	0.447102		hisL	b2018	2.07998	0.0525673		hisL	b2018	-2.51009	0.0190317			hisL	b2018	1.52321	0.159249		hisL	b2018	-1.25259	0.320128		hisL	b2018	-1.18819	0.284955			hisL	b2018
hisM	b2307	0.580325	0.545144		hisM	b2307	-0.582007	0.566128		hisM	b2307	0.437616	0.63811			hisM	b2307	-1.48531	0.092884		hisM	b2307	-0.507516	0.600373		hisM	b2307	0.842912	0.392214			hisM	b2307	0.582666	0.490364		hisM	b2307	1.57918	0.0213601		hisM	b2307	1.35489	0.0699387			hisM	b2307
hisP	b2306	2.10555	2.99028e-05		hisP	b2306	0.272406	0.738841		hisP	b2306	0.543237	0.466319			hisP	b2306	0.973089	0.0765387		hisP	b2306	0.0982997	0.914493		hisP	b2306	0.375392	0.738564			hisP	b2306	2.57373	1.58848e-08		hisP	b2306	1.57684	0.00156429		hisP	b2306	1.45253	0.0180974			hisP	b2306
hisQ	b2308	0.717732	0.357848		hisQ	b2308	-0.496924	0.595852		hisQ	b2308	-0.52417	0.533304			hisQ	b2308	-0.370708	0.644374		hisQ	b2308	0.839093	0.273489		hisQ	b2308	0.442611	0.655547			hisQ	b2308	1.27113	0.0486495		hisQ	b2308	2.14412	0.00052354		hisQ	b2308	1.38435	0.0393536			hisQ	b2308
hisR	b3797	0.780678	0.50808		hisR	b3797	0.756219	0.54666		hisR	b3797	-0.786591	0.480668			hisR	b3797	-0.20721	0.869649		hisR	b3797	1.34928	0.208663		hisR	b3797	-0.415176	0.742936			hisR	b3797	-0.0355426	0.983118		hisR	b3797	-0.829516	0.511184		hisR	b3797	-0.561678	0.635934			hisR	b3797
hisS	b2514	0.492032	0.356328		hisS	b2514	0.0210167	0.980658		hisS	b2514	-0.00267567	0.997032			hisS	b2514	0.859273	0.0536248		hisS	b2514	0.693439	0.187862		hisS	b2514	0.579012	0.283757			hisS	b2514	0.655426	0.182481		hisS	b2514	0.196491	0.787391		hisS	b2514	0.773043	0.107779			hisS	b2514
hiuH	b1970	-1.67124	0.188845		hiuH	b1970	0.627768	0.670093		hiuH	b1970	1.65438	0.174561			hiuH	b1970	-2.71119	0.0157927		hiuH	b1970	-0.568056	0.705525		hiuH	b1970	-0.414488	0.868145			hiuH	b1970	-2.3336	0.0234638		hiuH	b1970	0.219787	0.89607		hiuH	b1970	1.88312	0.118182			hiuH	b1970
hldD	b3619	0.0290175	0.951601		hldD	b3619	-0.248985	0.580756		hldD	b3619	0.435634	0.233007			hldD	b3619	0.858585	0.00530369		hldD	b3619	-0.432281	0.267822		hldD	b3619	0.62955	0.0856119			hldD	b3619	0.306018	0.43383		hldD	b3619	-0.283414	0.522714		hldD	b3619	0.46289	0.197643			hldD	b3619
hldE	b3052	0.830314	0.00168872		hldE	b3052	0.166494	0.684857		hldE	b3052	0.55643	0.0526454			hldE	b3052	1.07335	1.01507e-05		hldE	b3052	0.109097	0.79795		hldE	b3052	0.676238	0.0344304			hldE	b3052	0.994404	5.91302e-05		hldE	b3052	0.219098	0.570204		hldE	b3052	0.401614	0.201522			hldE	b3052
hlyE	b1182	-6.31598	0.00173189		hlyE	b1182	-4.87098	0.00522073		hlyE	b1182	-2.95705	0.01682			hlyE	b1182	-3.97501	0.00377459		hlyE	b1182	-3.59865	0.00699124		hlyE	b1182	-1.16411	0.467396			hlyE	b1182	-3.6855	0.00196577		hlyE	b1182	-3.34396	0.00634129		hlyE	b1182	-2.42095	0.0648972			hlyE	b1182
hmp	b2552	0.197768	0.861792		hmp	b2552	0.619325	0.516755		hmp	b2552	-0.0774218	0.948085			hmp	b2552	0.8249	0.286313		hmp	b2552	-0.114794	0.927529		hmp	b2552	-0.59753	0.546349			hmp	b2552	0.476187	0.603463		hmp	b2552	-0.114683	0.92447		hmp	b2552	1.62177	0.0197899			hmp	b2552
hns	b1237	-0.239121	0.75913		hns	b1237	-0.0493854	0.962567		hns	b1237	-0.428175	0.536682			hns	b1237	-0.667685	0.259146		hns	b1237	0.311565	0.693371		hns	b1237	-1.34927	0.0208794			hns	b1237	-0.420084	0.548425		hns	b1237	-1.14758	0.062975		hns	b1237	-1.25021	0.0264624			hns	b1237
hofB	b0107	0.346991	0.682645		hofB	b0107	0.336018	0.646792		hofB	b0107	0.345135	0.568164			hofB	b0107	0.929949	0.0906629		hofB	b0107	-0.437769	0.516242		hofB	b0107	-0.311878	0.70858			hofB	b0107	0.107109	0.89437		hofB	b0107	0.158334	0.8447		hofB	b0107	-0.24634	0.72189			hofB	b0107
hofC	b0106	-0.412535	0.715531		hofC	b0106	0.684127	0.467077		hofC	b0106	0.93316	0.227571			hofC	b0106	-0.394585	0.670064		hofC	b0106	0.106264	0.933646		hofC	b0106	0.310377	0.790439			hofC	b0106	-0.35789	0.706289		hofC	b0106	0.271892	0.809059		hofC	b0106	0.753123	0.363435			hofC	b0106
hofM	b3395	-0.672752	0.510321		hofM	b3395	-0.901072	0.315297		hofM	b3395	-0.92767	0.218965			hofM	b3395	-0.520139	0.536475		hofM	b3395	-1.01066	0.210395		hofM	b3395	0.0353797	0.980531			hofM	b3395	-0.726091	0.361171		hofM	b3395	-0.806141	0.323116		hofM	b3395	-0.84826	0.294847			hofM	b3395
hofN	b3394	2.28928	0.0720306		hofN	b3394	0.66021	0.688045		hofN	b3394	0.88195	0.536372			hofN	b3394	0.770254	0.610653		hofN	b3394	-0.919453	0.568669		hofN	b3394	1.46404	0.348613			hofN	b3394	-0.097757	0.961969		hofN	b3394	0.434576	0.799707		hofN	b3394	1.59861	0.211121			hofN	b3394
hofO	b3393	0.776202	0.791487		hofO	b3393	0.754567	0.785515		hofO	b3393	0.71891	NA			hofO	b3393	0.351915	0.893931		hofO	b3393	-1.72956	0.511501		hofO	b3393	-0.929099	NA			hofO	b3393	0.410643	0.879089		hofO	b3393	-0.169205	NA		hofO	b3393	2.24901	NA			hofO	b3393
hofP	b3392	-0.986798	0.775997		hofP	b3392	-1.37858	NA		hofP	b3392	-2.58687	NA			hofP	b3392	0.889818	0.712074		hofP	b3392	-2.02521	NA		hofP	b3392	-2.6444	NA			hofP	b3392	-0.572516	0.839836		hofP	b3392	-1.92141	NA		hofP	b3392	-1.70153	NA			hofP	b3392
hofQ	b3391	-0.468768	0.703375		hofQ	b3391	-0.860859	0.484886		hofQ	b3391	0.577944	0.531127			hofQ	b3391	0.463355	0.590882		hofQ	b3391	-0.00461078	0.997881		hofQ	b3391	0.836045	0.450908			hofQ	b3391	0.252383	0.791284		hofQ	b3391	0.29222	0.802203		hofQ	b3391	0.883258	0.310935			hofQ	b3391
hokB	b4428	-1.26072	0.321094		hokB	b4428	-2.65637	0.0528882		hokB	b4428	-1.31597	0.225201			hokB	b4428	-2.5337	0.024328		hokB	b4428	-0.848676	0.492931		hokB	b4428	-1.5959	0.316948			hokB	b4428	-3.22894	0.00184791		hokB	b4428	-2.7826	0.00977596		hokB	b4428	-0.471751	0.71752			hokB	b4428
hokD	b1562	-0.412987	0.633344		hokD	b1562	0.74241	0.369179		hokD	b1562	-1.40296	0.0316259			hokD	b1562	-0.543931	0.460406		hokD	b1562	1.40126	0.0447904		hokD	b1562	-0.647927	0.41752			hokD	b1562	-0.942598	0.184855		hokD	b1562	-1.05513	0.166413		hokD	b1562	-2.41273	8.07438e-05			hokD	b1562
hokE	b4415	-1.37608	0.526295		hokE	b4415	-1.30309	0.596367		hokE	b4415	0.376947	NA			hokE	b4415	-2.06367	0.249684		hokE	b4415	-0.538985	0.803473		hokE	b4415	-0.426424	NA			hokE	b4415	-2.47039	0.117748		hokE	b4415	-1.0204	NA		hokE	b4415	-0.431738	NA			hokE	b4415
holA	b0640	1.2383	0.000385726		holA	b0640	1.12049	0.00264263		holA	b0640	0.394064	0.346631			holA	b0640	1.1061	0.0010049		holA	b0640	0.829241	0.0364548		holA	b0640	0.360678	0.460987			holA	b0640	0.94279	0.00655041		holA	b0640	0.698897	0.0833791		holA	b0640	0.149666	0.767379			holA	b0640
holB	b1099	0.511438	0.369264		holB	b1099	0.526334	0.382636		holB	b1099	0.529838	0.325637			holB	b1099	0.799772	0.0875195		holB	b1099	0.829975	0.117107		holB	b1099	0.3245	0.620602			holB	b1099	0.311028	0.60105		holB	b1099	0.405364	0.524408		holB	b1099	0.170164	0.794221			holB	b1099
holC	b4259	0.856595	0.0717123		holC	b4259	0.87682	0.0869607		holC	b4259	0.70886	0.150237			holC	b4259	0.812629	0.0681531		holC	b4259	0.536984	0.338909		holC	b4259	0.687668	0.21249			holC	b4259	1.04956	0.01742		holC	b4259	0.2544	0.714766		holC	b4259	0.572324	0.268654			holC	b4259
holD	b4372	2.51401	3.32934e-06		holD	b4372	1.2404	0.0508753		holD	b4372	0.478166	0.497289			holD	b4372	2.31016	1.21394e-05		holD	b4372	0.918716	0.173393		holD	b4372	0.168926	0.851608			holD	b4372	1.78869	0.00121882		holD	b4372	0.171678	0.85956		holD	b4372	-0.51941	0.46186			holD	b4372
holE	b1842	0.292612	0.704492		holE	b1842	0.653508	0.297406		holE	b1842	0.178574	0.78434			holE	b1842	1.16889	0.0135583		holE	b1842	0.642862	0.274754		holE	b1842	-0.167812	0.844507			holE	b1842	0.33741	0.588948		holE	b1842	0.552027	0.362907		holE	b1842	0.203963	0.756623			holE	b1842
hpf	b3203	-0.70134	0.107183		hpf	b3203	0.909119	0.0345816		hpf	b3203	1.12801	0.00401349			hpf	b3203	-0.495521	0.238856		hpf	b3203	0.715702	0.113957		hpf	b3203	0.244002	0.670997			hpf	b3203	-0.766958	0.0595765		hpf	b3203	1.21801	0.00212808		hpf	b3203	1.02328	0.00995494			hpf	b3203
hpt	b0125	-1.52549	0.00125528		hpt	b0125	-1.18515	0.0160621		hpt	b0125	-0.361486	0.525316			hpt	b0125	-0.76726	0.10221		hpt	b0125	-0.0103011	0.992208		hpt	b0125	-0.212051	0.746471			hpt	b0125	-1.04716	0.0227157		hpt	b0125	-0.475347	0.430354		hpt	b0125	-0.144684	0.824472			hpt	b0125
hrpA	b1413	-0.358425	0.246053		hrpA	b1413	-0.42554	0.184071		hrpA	b1413	-0.249727	0.42935			hrpA	b1413	0.249397	0.381897		hrpA	b1413	-0.402652	0.198455		hrpA	b1413	-0.311537	0.371764			hrpA	b1413	0.0893861	0.801984		hrpA	b1413	-0.451747	0.132116		hrpA	b1413	-0.337712	0.265695			hrpA	b1413
hrpB	b0148	0.853832	0.00340643		hrpB	b0148	0.138995	0.738014		hrpB	b0148	-0.164297	0.653666			hrpB	b0148	0.885526	0.000955237		hrpB	b0148	-0.159116	0.692723		hrpB	b0148	0.160093	0.706367			hrpB	b0148	0.867475	0.00115491		hrpB	b0148	-0.35491	0.305822		hrpB	b0148	4.00968e-05	0.999863			hrpB	b0148
hscA	b2526	1.47368	0.0537682		hscA	b2526	0.911811	0.326365		hscA	b2526	0.522239	0.574316			hscA	b2526	2.33701	0.000628458		hscA	b2526	1.37222	0.0971525		hscA	b2526	1.869	0.0152355			hscA	b2526	1.90013	0.00851635		hscA	b2526	0.887236	0.344296		hscA	b2526	1.86247	0.0109168			hscA	b2526
hscB	b2527	2.13089	8.82203e-05		hscB	b2527	1.25829	0.0405618		hscB	b2527	1.12348	0.0600226			hscB	b2527	3.86782	6.01805e-15		hscB	b2527	1.13601	0.0711268		hscB	b2527	2.26578	5.84122e-05			hscB	b2527	2.96026	5.98777e-09		hscB	b2527	1.19869	0.051553		hscB	b2527	2.52952	1.53223e-06			hscB	b2527
hscC	b0650	1.67019	0.0328848		hscC	b0650	0.681286	0.47681		hscC	b0650	-0.111323	0.914275			hscC	b0650	1.14548	0.133229		hscC	b0650	0.077297	0.954648		hscC	b0650	-0.535221	0.648621			hscC	b0650	0.997745	0.198263		hscC	b0650	0.736515	0.394146		hscC	b0650	0.112087	0.911981			hscC	b0650
hsdM	b4349	0.765785	0.167406		hsdM	b4349	0.665793	0.25138		hsdM	b4349	0.323691	0.545334			hsdM	b4349	0.631564	0.205553		hsdM	b4349	1.49352	0.00118192		hsdM	b4349	1.21212	0.00941098			hsdM	b4349	0.664126	0.178927		hsdM	b4349	0.575215	0.311254		hsdM	b4349	-0.106179	0.873464			hsdM	b4349
hsdR	b4350	-0.618592	0.303477		hsdR	b4350	-0.534871	0.435786		hsdR	b4350	-0.0875385	0.911049			hsdR	b4350	-0.406282	0.460699		hsdR	b4350	-0.529517	0.419135		hsdR	b4350	-0.192959	0.820726			hsdR	b4350	-0.37615	0.52853		hsdR	b4350	-0.44107	0.51741		hsdR	b4350	-0.314455	0.644402			hsdR	b4350
hsdS	b4348	1.9722	0.00902585		hsdS	b4348	1.93807	0.00715788		hsdS	b4348	1.01883	0.105152			hsdS	b4348	1.35116	0.0700312		hsdS	b4348	1.82141	0.0104841		hsdS	b4348	0.903351	0.278782			hsdS	b4348	1.07099	0.15953		hsdS	b4348	0.689281	0.456188		hsdS	b4348	0.0795687	0.936271			hsdS	b4348
hslJ	b1379	-0.0500679	0.94424		hslJ	b1379	0.454216	0.487993		hslJ	b1379	-0.731408	0.17323			hslJ	b1379	-0.909967	0.07002		hslJ	b1379	1.23599	0.016773		hslJ	b1379	-0.281356	0.677394			hslJ	b1379	-0.901032	0.0820591		hslJ	b1379	0.110638	0.894357		hslJ	b1379	-0.628137	0.251445			hslJ	b1379
hslO	b3401	-0.328389	0.517156		hslO	b3401	-0.934887	0.0296844		hslO	b3401	-1.1154	0.00418655			hslO	b3401	-0.150112	0.764336		hslO	b3401	0.170699	0.777735		hslO	b3401	-0.313626	0.537018			hslO	b3401	-0.0839744	0.887958		hslO	b3401	-0.733425	0.102149		hslO	b3401	-1.12693	0.00360244			hslO	b3401
hslR	b3400	-1.54798	0.000242664		hslR	b3400	-0.925326	0.0289893		hslR	b3400	-1.3262	0.000323809			hslR	b3400	-0.970724	0.013276		hslR	b3400	0.0192278	0.979567		hslR	b3400	-0.867218	0.041386			hslR	b3400	-1.36306	0.000291024		hslR	b3400	-0.747017	0.0844603		hslR	b3400	-1.22961	0.000941542			hslR	b3400
hslU	b3931	-0.153261	0.861792		hslU	b3931	-0.409164	0.625431		hslU	b3931	-0.931268	0.148476			hslU	b3931	0.603966	0.350274		hslU	b3931	0.0504833	0.96486		hslU	b3931	-0.70484	0.317848			hslU	b3931	-0.0448572	0.963		hslU	b3931	-1.06499	0.116005		hslU	b3931	-1.3938	0.0191223			hslU	b3931
hslV	b3932	-1.78542	0.00117348		hslV	b3932	-1.3695	0.018975		hslV	b3932	-1.75738	0.000979854			hslV	b3932	-1.79556	0.00058526		hslV	b3932	-0.498238	0.482552		hslV	b3932	-1.38066	0.0168813			hslV	b3932	-1.64688	0.00196466		hslV	b3932	-1.75289	0.00140467		hslV	b3932	-2.12475	3.70979e-05			hslV	b3932
hspQ	b0966	-2.18021	3.53746e-07		hspQ	b0966	-1.93531	9.86774e-06		hspQ	b0966	-2.00114	2.53834e-06			hspQ	b0966	-2.61535	1.79515e-10		hspQ	b0966	-0.858673	0.0925446		hspQ	b0966	-0.704353	0.175873			hspQ	b0966	-2.50701	1.07067e-09		hspQ	b0966	-1.6252	0.000275543		hspQ	b0966	-2.55762	6.38806e-10			hspQ	b0966
hsrA	b3754	-1.05044	0.0615274		hsrA	b3754	-0.374268	0.59655		hsrA	b3754	0.329211	0.593314			hsrA	b3754	-1.07515	0.0261124		hsrA	b3754	-0.895865	0.118055		hsrA	b3754	-0.12195	0.898978			hsrA	b3754	-1.02691	0.0272862		hsrA	b3754	-0.618926	0.297796		hsrA	b3754	0.223756	0.746699			hsrA	b3754
htpG	b0473	-1.09951	0.0381604		htpG	b0473	-0.726649	0.245209		htpG	b0473	-1.23724	0.0167801			htpG	b0473	-0.204941	0.749813		htpG	b0473	-0.29798	0.681932		htpG	b0473	-0.506059	0.426903			htpG	b0473	-0.887895	0.101028		htpG	b0473	-1.35738	0.0106255		htpG	b0473	-1.26847	0.0130392			htpG	b0473
htpX	b1829	-1.01545	0.0492968		htpX	b1829	-1.79842	0.000242156		htpX	b1829	-1.24422	0.0124916			htpX	b1829	-0.695675	0.176391		htpX	b1829	0.283458	0.685605		htpX	b1829	0.071201	0.931358			htpX	b1829	-0.99938	0.0493983		htpX	b1829	-0.674915	0.269947		htpX	b1829	-0.685766	0.210911			htpX	b1829
htrE	b0139	1.29177	0.346567		htrE	b0139	0.286297	0.883354		htrE	b0139	-1.16579	0.331057			htrE	b0139	0.0178762	0.993405		htrE	b0139	1.51309	0.232263		htrE	b0139	-0.122756	0.950458			htrE	b0139	0.331103	0.829972		htrE	b0139	0.671594	0.671152		htrE	b0139	-2.20062	0.0936829			htrE	b0139
hupA	b4000	-0.406079	0.556393		hupA	b4000	-0.752951	0.265961		hupA	b4000	-0.177996	0.822544			hupA	b4000	-0.426662	0.488451		hupA	b4000	-0.623393	0.357821		hupA	b4000	-0.0588337	0.951172			hupA	b4000	-0.280784	0.701833		hupA	b4000	-0.426634	0.584842		hupA	b4000	1.15565	0.0396264			hupA	b4000
hupB	b0440	-1.48712	0.0290669		hupB	b0440	-0.101711	0.927896		hupB	b0440	0.403442	0.646012			hupB	b0440	-2.38568	0.000112597		hupB	b0440	-0.0183547	0.989632		hupB	b0440	-0.426795	0.639272			hupB	b0440	-1.492	0.0272821		hupB	b0440	-0.970249	0.238047		hupB	b0440	0.84124	0.265385			hupB	b0440
hyaA	b0972	-0.0526337	0.974261		hyaA	b0972	1.26313	0.402698		hyaA	b0972	0.483953	0.757815			hyaA	b0972	-0.568725	0.704553		hyaA	b0972	2.3244	0.0697135		hyaA	b0972	1.63062	0.210602			hyaA	b0972	-0.470058	0.774277		hyaA	b0972	1.4897	0.305822		hyaA	b0972	-0.945473	0.494938			hyaA	b0972
hyaB	b0973	1.21777	0.36117		hyaB	b0973	1.08297	0.459528		hyaB	b0973	0.894552	0.503797			hyaB	b0973	0.0601012	0.973821		hyaB	b0973	1.53675	0.239452		hyaB	b0973	2.05008	0.0855492			hyaB	b0973	0.293959	0.853016		hyaB	b0973	0.747774	0.645147		hyaB	b0973	-0.545919	0.706807			hyaB	b0973
hyaC	b0974	0.268043	0.847595		hyaC	b0974	0.495877	0.711466		hyaC	b0974	0.41032	0.726718			hyaC	b0974	-0.967012	0.361241		hyaC	b0974	1.32511	0.210001		hyaC	b0974	1.00957	0.328949			hyaC	b0974	-0.571563	0.628147		hyaC	b0974	0.621637	0.635081		hyaC	b0974	-1.23446	0.201965			hyaC	b0974
hyaD	b0975	0.72212	0.600891		hyaD	b0975	1.2349	0.356904		hyaD	b0975	0.375063	0.79904			hyaD	b0975	-0.413865	0.762453		hyaD	b0975	1.51166	0.225789		hyaD	b0975	1.38283	0.251253			hyaD	b0975	-0.520583	0.72347		hyaD	b0975	0.570992	0.727989		hyaD	b0975	-1.08852	0.369391			hyaD	b0975
hyaE	b0976	0.849455	0.548513		hyaE	b0976	1.23103	0.336228		hyaE	b0976	0.885643	0.415373			hyaE	b0976	0.20341	0.890647		hyaE	b0976	1.72682	0.128354		hyaE	b0976	2.17634	0.0235999			hyaE	b0976	-0.148144	0.928282		hyaE	b0976	0.963412	0.468439		hyaE	b0976	-0.881841	0.436869			hyaE	b0976
hyaF	b0977	0.380102	0.831173		hyaF	b0977	1.72924	0.220118		hyaF	b0977	0.0204125	0.992538			hyaF	b0977	-0.097425	0.956031		hyaF	b0977	1.70199	0.21644		hyaF	b0977	1.03924	0.46203			hyaF	b0977	-0.209382	0.905277		hyaF	b0977	0.650342	0.718528		hyaF	b0977	-0.863635	0.542593			hyaF	b0977
hybA	b2996	-0.288141	0.88895		hybA	b2996	-1.6328	0.126011		hybA	b2996	-0.109346	0.939573			hybA	b2996	1.12537	0.31026		hybA	b2996	-0.645348	0.568763		hybA	b2996	0.968421	0.381058			hybA	b2996	0.645096	0.611634		hybA	b2996	-2.1345	0.0183726		hybA	b2996	-0.695659	0.547972			hybA	b2996
hybB	b2995	0.922698	0.442826		hybB	b2995	-1.12452	0.341308		hybB	b2995	-0.470966	0.688435			hybB	b2995	-0.925264	0.45585		hybB	b2995	0.0923014	0.955169		hybB	b2995	0.674265	0.578496			hybB	b2995	-0.251433	0.850507		hybB	b2995	-1.72035	0.0844603		hybB	b2995	-0.446577	0.717734			hybB	b2995
hybC	b2994	0.33289	0.563403		hybC	b2994	-0.277999	0.670457		hybC	b2994	-0.223873	0.681883			hybC	b2994	0.0158112	0.983191		hybC	b2994	0.0972792	0.891841		hybC	b2994	-0.288087	0.639272			hybC	b2994	0.0746493	0.905277		hybC	b2994	0.0128885	0.985356		hybC	b2994	-0.482367	0.325192			hybC	b2994
hybD	b2993	1.90691	0.00158444		hybD	b2993	0.614656	0.460629		hybD	b2993	0.366707	0.651072			hybD	b2993	1.58317	0.00766521		hybD	b2993	0.10525	0.921778		hybD	b2993	-0.464433	0.589181			hybD	b2993	1.35595	0.0307259		hybD	b2993	-0.118363	0.913064		hybD	b2993	-0.142187	0.878406			hybD	b2993
hybE	b2992	1.65244	0.00116403		hybE	b2992	0.943939	0.104794		hybE	b2992	0.0995402	0.898405			hybE	b2992	1.58845	0.000932177		hybE	b2992	0.0137506	0.990441		hybE	b2992	0.237174	0.754214			hybE	b2992	1.40894	0.0039042		hybE	b2992	0.132056	0.875498		hybE	b2992	-0.374714	0.569508			hybE	b2992
hybF	b2991	0.00244562	0.998582		hybF	b2991	0.452483	0.7261		hybF	b2991	0.558293	0.594173			hybF	b2991	0.310119	0.786666		hybF	b2991	0.398722	0.761569		hybF	b2991	0.778381	0.507383			hybF	b2991	-0.533115	0.64388		hybF	b2991	0.127346	0.930107		hybF	b2991	0.145023	0.911841			hybF	b2991
hybG	b2990	1.53444	0.00032811		hybG	b2990	1.75938	6.70672e-05		hybG	b2990	0.454185	0.364194			hybG	b2990	1.19533	0.00386609		hybG	b2990	0.793031	0.137176		hybG	b2990	0.133663	0.866392			hybG	b2990	1.21206	0.00283085		hybG	b2990	1.01825	0.0328412		hybG	b2990	0.0510922	0.941744			hybG	b2990
hybO	b2997	0.818832	0.545723		hybO	b2997	-2.49723	0.0218708		hybO	b2997	-1.36665	0.216179			hybO	b2997	-0.62906	0.636476		hybO	b2997	-0.907267	0.475859		hybO	b2997	-0.773355	0.557062			hybO	b2997	-0.0145214	0.993922		hybO	b2997	-2.57859	0.0123186		hybO	b2997	-1.43633	0.195227			hybO	b2997
hycA	b2725	-2.68934	0.356328		hycA	b2725	-4.28733	0.108252		hycA	b2725	-4.92771	0.0213576			hycA	b2725	-4.29868	0.104304		hycA	b2725	-2.09356	0.43269		hycA	b2725	-3.76486	0.132977			hycA	b2725	-4.69117	0.0668712		hycA	b2725	-3.70166	0.127081		hycA	b2725	-5.73167	0.0130711			hycA	b2725
hycB	b2724	1.58029	0.347278		hycB	b2724	-0.924525	0.584494		hycB	b2724	-2.57505	0.0352485			hycB	b2724	-0.797478	0.698814		hycB	b2724	-2.50787	0.0811452		hycB	b2724	-2.53968	0.0947075			hycB	b2724	1.20766	0.45546		hycB	b2724	-3.28062	0.0138277		hycB	b2724	-3.01142	0.0177721			hycB	b2724
hycC	b2723	0.896765	0.452663		hycC	b2723	-2.43951	0.0149889		hycC	b2723	-2.23473	0.0128013			hycC	b2723	0.00300776	0.998866		hycC	b2723	-1.71002	0.097152		hycC	b2723	-1.46429	0.171327			hycC	b2723	0.440778	0.733105		hycC	b2723	-2.30108	0.0144182		hycC	b2723	-3.19516	0.000428333			hycC	b2723
hycD	b2722	-1.00415	0.667377		hycD	b2722	-3.01653	0.0365829		hycD	b2722	-2.3854	0.0427463			hycD	b2722	0.365023	0.830871		hycD	b2722	-1.75935	0.197098		hycD	b2722	-0.572557	0.723726			hycD	b2722	0.674227	0.677027		hycD	b2722	-3.08367	0.012267		hycD	b2722	-3.12936	0.0136141			hycD	b2722
hycE	b2721	1.02271	0.188517		hycE	b2721	-0.367146	0.709989		hycE	b2721	-0.651255	0.378579			hycE	b2721	0.831653	0.242443		hycE	b2721	-0.903942	0.263238		hycE	b2721	0.0106644	0.991732			hycE	b2721	0.604641	0.442526		hycE	b2721	-0.329248	0.742192		hycE	b2721	-1.16513	0.101225			hycE	b2721
hycF	b2720	2.28795	0.058147		hycF	b2720	-1.7168	0.274643		hycF	b2720	-0.20552	0.893637			hycF	b2720	2.42268	0.0232006		hycF	b2720	-0.364824	0.813897		hycF	b2720	1.55189	0.190144			hycF	b2720	1.89205	0.0946621		hycF	b2720	-1.34286	0.294976		hycF	b2720	-0.2066	0.894294			hycF	b2720
hycG	b2719	0.0420962	0.967219		hycG	b2719	-0.987295	0.301259		hycG	b2719	-1.53978	0.0225685			hycG	b2719	0.237182	0.790001		hycG	b2719	-0.582408	0.514064		hycG	b2719	-1.37897	0.17732			hycG	b2719	0.123883	0.900251		hycG	b2719	-0.393423	0.687879		hycG	b2719	-1.17013	0.11398			hycG	b2719
hycH	b2718	0.154821	0.891851		hycH	b2718	-0.163491	0.890208		hycH	b2718	-1.49699	0.0304751			hycH	b2718	-0.388793	0.661667		hycH	b2718	0.109043	0.9266		hycH	b2718	-0.11051	0.928781			hycH	b2718	-0.48576	0.571913		hycH	b2718	-0.733323	0.408664		hycH	b2718	-1.22397	0.10541			hycH	b2718
hycI	b2717	0.997618	0.0520144		hycI	b2717	-0.0138555	0.988419		hycI	b2717	-1.28526	0.00436691			hycI	b2717	1.12889	0.0123215		hycI	b2717	-0.0530642	0.952481		hycI	b2717	-0.758487	0.207497			hycI	b2717	0.689987	0.168301		hycI	b2717	-0.277798	0.692302		hycI	b2717	-1.62576	0.000515915			hycI	b2717
hydN	b2713	-0.346909	0.823898		hydN	b2713	-1.78675	0.10233		hydN	b2713	-3.24967	0.000218697			hydN	b2713	0.985422	0.334742		hydN	b2713	-1.58735	0.139391		hydN	b2713	-2.16824	0.0392513			hydN	b2713	0.0424223	0.980054		hydN	b2713	-2.0491	0.0383576		hydN	b2713	-3.42114	0.000195993			hydN	b2713
hyfA	b2481	0.670959	0.659655		hyfA	b2481	0.195707	0.920047		hyfA	b2481	-0.839936	0.51135			hyfA	b2481	0.336851	0.810815		hyfA	b2481	-0.296236	0.875563		hyfA	b2481	0.0672459	0.975733			hyfA	b2481	-0.527243	0.720821		hyfA	b2481	-0.239606	0.89827		hyfA	b2481	-0.849159	0.536641			hyfA	b2481
hyfB	b2482	-0.722094	0.482143		hyfB	b2482	-0.698402	0.445311		hyfB	b2482	-0.513234	0.495353			hyfB	b2482	-0.00463444	0.99675		hyfB	b2482	-0.281494	0.770465		hyfB	b2482	0.112443	0.922873			hyfB	b2482	-0.483148	0.545685		hyfB	b2482	0.195426	0.844062		hyfB	b2482	0.0705115	0.941744			hyfB	b2482
hyfC	b2483	-0.480251	0.882215		hyfC	b2483	-1.66842	0.580631		hyfC	b2483	-1.29291	NA			hyfC	b2483	-0.289769	0.912878		hyfC	b2483	-0.0458774	0.989186		hyfC	b2483	1.51909	NA			hyfC	b2483	0.559333	0.792367		hyfC	b2483	0.769381	NA		hyfC	b2483	-0.536338	NA			hyfC	b2483
hyfD	b2484	-0.746118	0.532964		hyfD	b2484	-0.483246	0.677449		hyfD	b2484	-0.582892	0.503728			hyfD	b2484	-0.585611	0.529882		hyfD	b2484	-0.698068	0.461349		hyfD	b2484	-0.149552	0.91616			hyfD	b2484	-0.548567	0.53781		hyfD	b2484	-0.247337	0.827209		hyfD	b2484	-0.832907	0.358419			hyfD	b2484
hyfE	b2485	0.203111	0.926549		hyfE	b2485	-3.04456	0.210862		hyfE	b2485	-0.00303419	NA			hyfE	b2485	-0.170029	0.935921		hyfE	b2485	-0.436438	0.829038		hyfE	b2485	-3.07724	NA			hyfE	b2485	-1.40327	0.423051		hyfE	b2485	0.347321	0.860592		hyfE	b2485	-0.250995	0.900428			hyfE	b2485
hyfF	b2486	-0.162793	0.876163		hyfF	b2486	-0.680814	0.410315		hyfF	b2486	-0.338034	0.670209			hyfF	b2486	-0.771404	0.288072		hyfF	b2486	-0.870299	0.243351		hyfF	b2486	-0.479426	0.606071			hyfF	b2486	-0.681078	0.349536		hyfF	b2486	-0.560824	0.487441		hyfF	b2486	-0.193919	0.825226			hyfF	b2486
hyfG	b2487	-0.518636	0.562371		hyfG	b2487	-0.57887	0.537681		hyfG	b2487	-0.25682	0.772965			hyfG	b2487	-0.947883	0.18065		hyfG	b2487	-0.0943637	0.93592		hyfG	b2487	0.32144	0.735485			hyfG	b2487	-0.0265946	0.981099		hyfG	b2487	0.118708	0.913064		hyfG	b2487	-0.251064	0.779808			hyfG	b2487
hyfH	b2488	-0.00134764	0.998701		hyfH	b2488	-1.06693	0.425271		hyfH	b2488	0.395482	0.75848			hyfH	b2488	-0.311761	0.79912		hyfH	b2488	-0.880567	0.452216		hyfH	b2488	0.973466	0.473071			hyfH	b2488	-0.436234	0.712277		hyfH	b2488	0.591895	0.612892		hyfH	b2488	0.175778	0.907121			hyfH	b2488
hyfI	b2489	0.667623	0.457539		hyfI	b2489	0.176619	0.883648		hyfI	b2489	-0.352139	0.698759			hyfI	b2489	0.350427	0.687491		hyfI	b2489	-0.147015	0.904426		hyfI	b2489	0.274126	0.79901			hyfI	b2489	0.252644	0.788837		hyfI	b2489	0.112822	0.924615		hyfI	b2489	-1.3644	0.0893287			hyfI	b2489
hyfJ	b2490	-2.94827	0.206782		hyfJ	b2490	-2.23244	0.261023		hyfJ	b2490	0.796904	0.61707			hyfJ	b2490	-0.386585	0.830871		hyfJ	b2490	0.146045	0.942323		hyfJ	b2490	-0.821784	NA			hyfJ	b2490	0.170044	0.926639		hyfJ	b2490	-1.75627	0.238047		hyfJ	b2490	0.986338	0.53629			hyfJ	b2490
hyfR	b2491	0.128754	0.892535		hyfR	b2491	-0.244146	0.791756		hyfR	b2491	0.417743	0.516666			hyfR	b2491	0.109194	0.887542		hyfR	b2491	-0.0242781	0.983438		hyfR	b2491	-0.100153	0.929836			hyfR	b2491	-0.178419	0.812045		hyfR	b2491	0.432241	0.559177		hyfR	b2491	0.260576	0.724493			hyfR	b2491
hyi	b0508	-0.399586	0.896456		hyi	b0508	0.601131	0.778006		hyi	b0508	1.45172	0.304631			hyi	b0508	2.18563	0.12346		hyi	b0508	1.67303	0.280951		hyi	b0508	3.11627	0.0165387			hyi	b0508	2.17534	0.128509		hyi	b0508	0.642344	0.756544		hyi	b0508	0.693927	0.689483			hyi	b0508
hypA	b2726	-2.15913	0.0615274		hypA	b2726	-3.35644	0.000943101		hypA	b2726	-3.94254	2.39728e-05			hypA	b2726	-3.35885	0.00258474		hypA	b2726	-1.6035	0.0797947		hypA	b2726	-1.30685	0.237122			hypA	b2726	-2.36092	0.00582787		hypA	b2726	-3.61405	2.00622e-05		hypA	b2726	-3.11897	0.000880982			hypA	b2726
hypB	b2727	-0.469286	0.661872		hypB	b2727	-2.94954	0.000356189		hypB	b2727	-1.93688	0.0117752			hypB	b2727	-1.04524	0.211319		hypB	b2727	-1.45894	0.0870157		hypB	b2727	-1.37176	0.15157			hypB	b2727	-1.45154	0.0709318		hypB	b2727	-1.77196	0.0255257		hypB	b2727	-1.62465	0.0433876			hypB	b2727
hypC	b2728	0.377509	0.877891		hypC	b2728	-0.464251	0.800882		hypC	b2728	-1.37298	0.337007			hypC	b2728	-2.01494	0.371246		hypC	b2728	-1.55247	0.311647		hypC	b2728	-0.945057	NA			hypC	b2728	-0.13593	0.95169		hypC	b2728	-1.57903	0.294771		hypC	b2728	-2.12818	0.161948			hypC	b2728
hypD	b2729	0.738413	0.152388		hypD	b2729	-0.511269	0.380359		hypD	b2729	-1.05722	0.0161067			hypD	b2729	0.324267	0.542142		hypD	b2729	-0.460088	0.422055		hypD	b2729	-0.86272	0.108909			hypD	b2729	0.684263	0.152017		hypD	b2729	-0.923134	0.0566094		hypD	b2729	-1.38863	0.00161565			hypD	b2729
hypE	b2730	0.333217	0.557383		hypE	b2730	-0.104175	0.884643		hypE	b2730	-1.13457	0.00751807			hypE	b2730	-0.13048	0.819089		hypE	b2730	0.0482882	0.95293		hypE	b2730	-0.564399	0.283987			hypE	b2730	0.415521	0.419453		hypE	b2730	-0.428833	0.458149		hypE	b2730	-1.51922	0.000265888			hypE	b2730
hypF	b2712	-1.5122	0.0216038		hypF	b2712	-1.56142	0.00582813		hypF	b2712	-1.53647	0.00211904			hypF	b2712	-1.05352	0.0624694		hypF	b2712	-1.45602	0.00937653		hypF	b2712	-1.48879	0.0129527			hypF	b2712	-0.563859	0.360505		hypF	b2712	-1.3605	0.0105273		hypF	b2712	-2.10849	3.26843e-05			hypF	b2712
hypT	b4327	0.125409	0.860696		hypT	b4327	-0.293895	0.621591		hypT	b4327	-0.223261	0.654768			hypT	b4327	0.193669	0.717519		hypT	b4327	-0.528711	0.279789		hypT	b4327	0.216309	0.726695			hypT	b4327	0.230102	0.661686		hypT	b4327	-0.0224376	0.974101		hypT	b4327	-0.347727	0.48311			hypT	b4327
hyuA	b2873	-0.128636	0.930158		hyuA	b2873	-0.230946	0.879738		hyuA	b2873	-0.28228	0.802778			hyuA	b2873	1.28165	0.119495		hyuA	b2873	0.84319	0.415229		hyuA	b2873	-0.36527	0.808163			hyuA	b2873	0.672532	0.488751		hyuA	b2873	0.905421	0.364795		hyuA	b2873	0.0300297	0.979507			hyuA	b2873
iaaA	b0828	-0.31054	0.699823		iaaA	b0828	-0.719742	0.341308		iaaA	b0828	-0.668188	0.336557			iaaA	b0828	0.303807	0.67388		iaaA	b0828	-0.173692	0.857268		iaaA	b0828	-0.624426	0.400757			iaaA	b0828	0.152603	0.857196		iaaA	b0828	0.858715	0.2365		iaaA	b0828	0.141079	0.872544			iaaA	b0828
iadA	b4328	-0.397121	0.573367		iadA	b4328	-0.282636	0.713679		iadA	b4328	-1.07188	0.0374542			iadA	b4328	-0.104355	0.881463		iadA	b4328	0.18997	0.809501		iadA	b4328	0.500034	0.428366			iadA	b4328	-0.326474	0.619774		iadA	b4328	0.208257	0.798793		iadA	b4328	-1.47841	0.00370138			iadA	b4328
iap	b2753	-0.363232	0.608707		iap	b2753	-0.491867	0.469825		iap	b2753	-0.0201598	0.980714			iap	b2753	0.21813	0.706264		iap	b2753	0.595021	0.272976		iap	b2753	0.22796	0.777824			iap	b2753	-0.00254237	0.997666		iap	b2753	0.590408	0.273795		iap	b2753	0.550103	0.309594			iap	b2753
ibaG	b3190	1.41964	0.0356754		ibaG	b3190	0.384356	0.653252		ibaG	b3190	0.94829	0.131958			ibaG	b3190	1.60572	0.00748772		ibaG	b3190	1.11234	0.0873787		ibaG	b3190	0.663851	0.380055			ibaG	b3190	1.92729	0.000921334		ibaG	b3190	0.555062	0.47823		ibaG	b3190	1.28777	0.030458			ibaG	b3190
ibpA	b3687	-2.13542	0.0039857		ibpA	b3687	-1.37062	0.0793746		ibpA	b3687	-1.94766	0.00394602			ibpA	b3687	-1.91955	0.00496218		ibpA	b3687	-0.250678	0.812552		ibpA	b3687	-1.26612	0.100614			ibpA	b3687	-1.85905	0.00652711		ibpA	b3687	-1.67243	0.0211467		ibpA	b3687	-1.99988	0.00288912			ibpA	b3687
ibpB	b3686	-2.03244	0.0340185		ibpB	b3686	-3.121	3.22456e-05		ibpB	b3686	-3.09094	2.37893e-06			ibpB	b3686	-3.23996	0.00045643		ibpB	b3686	-0.721057	0.418867		ibpB	b3686	-1.70576	0.0240909			ibpB	b3686	-2.72886	0.000336106		ibpB	b3686	-2.9673	1.51287e-05		ibpB	b3686	-3.30668	7.4155e-07			ibpB	b3686
ibsA	b4667	-0.872953	0.425291		ibsA	b4667	-0.297932	0.834314		ibsA	b4667	-0.988868	0.316929			ibsA	b4667	-0.0199685	0.989915		ibsA	b4667	1.07021	0.307012		ibsA	b4667	-0.868985	0.451246			ibsA	b4667	0.260015	0.827225		ibsA	b4667	-1.36231	0.199877		ibsA	b4667	0.0782836	0.953642			ibsA	b4667
ibsB	b4668	-3.94081	0.00596827		ibsB	b4668	-2.12998	0.0214759		ibsB	b4668	-3.48035	8.18128e-06			ibsB	b4668	-2.87835	0.00296331		ibsB	b4668	-0.583442	0.605003		ibsB	b4668	-2.61644	0.00389978			ibsB	b4668	-1.79447	0.0413142		ibsB	b4668	-2.82877	0.000764424		ibsB	b4668	-2.0632	0.0115844			ibsB	b4668
ibsC	b4665	0.299053	0.815252		ibsC	b4665	-0.151837	0.916494		ibsC	b4665	-2.7006	0.0010594			ibsC	b4665	-0.242192	0.830218		ibsC	b4665	0.154728	0.914493		ibsC	b4665	-2.4129	0.00717973			ibsC	b4665	1.04846	0.281041		ibsC	b4665	-2.64644	0.00244133		ibsC	b4665	-2.36914	0.00461515			ibsC	b4665
ibsD	b4664	0.676099	0.50808		ibsD	b4664	-0.655551	0.559988		ibsD	b4664	-2.01823	0.0115045			ibsD	b4664	0.86073	0.324798		ibsD	b4664	1.0787	0.256538		ibsD	b4664	-1.8094	0.0415206			ibsD	b4664	1.70146	0.0358504		ibsD	b4664	-1.98858	0.0207055		ibsD	b4664	-1.11032	0.206471			ibsD	b4664
ibsE	b4666	-1.30564	0.103837		ibsE	b4666	-0.825458	0.350052		ibsE	b4666	-2.7114	2.87013e-05			ibsE	b4666	-1.58945	0.0248731		ibsE	b4666	-0.0506392	0.969791		ibsE	b4666	-3.26845	7.85292e-06			ibsE	b4666	-0.656929	0.431068		ibsE	b4666	-2.3524	0.000727966		ibsE	b4666	-2.28213	0.000516788			ibsE	b4666
icd	b1136	-1.14689	0.0948112		icd	b1136	-0.757937	0.354169		icd	b1136	2.31256	0.000212258			icd	b1136	-0.360991	0.63987		icd	b1136	-2.12274	0.00122118		icd	b1136	1.30693	0.0695693			icd	b1136	-0.417254	0.617523		icd	b1136	0.0332295	0.97626		icd	b1136	3.04806	3.50066e-07			icd	b1136
icdC	b4519	0.314361	NA		icdC	b4519	1.67854	NA		icdC	b4519	3.37072	NA			icdC	b4519	-0.537028	NA		icdC	b4519	1.79957	NA		icdC	b4519	1.95925	NA			icdC	b4519	-1.72879	NA		icdC	b4519	0.597699	NA		icdC	b4519	0.441834	NA			icdC	b4519
iclR	b4018	2.2642	2.67392e-06		iclR	b4018	0.846964	0.113176		iclR	b4018	1.09473	0.0205978			iclR	b4018	2.80603	2.01123e-10		iclR	b4018	0.401479	0.512391		iclR	b4018	0.606757	0.334995			iclR	b4018	1.86641	5.66091e-05		iclR	b4018	0.202198	0.786728		iclR	b4018	1.45456	0.00139494			iclR	b4018
idi	b2889	-1.14002	0.0237801		idi	b2889	0.281398	0.690376		idi	b2889	-0.380441	0.495353			idi	b2889	-1.86272	3.35157e-05		idi	b2889	-0.226261	0.756486		idi	b2889	-0.784973	0.276729			idi	b2889	-1.61469	7.27511e-05		idi	b2889	-0.232656	0.750111		idi	b2889	-0.733103	0.174491			idi	b2889
idnD	b4267	-1.00368	0.731833		idnD	b4267	-0.860835	0.76078		idnD	b4267	1.85951	NA			idnD	b4267	0.386132	0.859317		idnD	b4267	-0.241071	0.934375		idnD	b4267	1.40642	NA			idnD	b4267	0.242682	0.919086		idnD	b4267	-1.18581	0.632281		idnD	b4267	3.04225	0.0923899			idnD	b4267
idnK	b4268	-1.16225	0.279478		idnK	b4268	0.45433	0.699534		idnK	b4268	0.269113	0.779244			idnK	b4268	-1.08747	0.195942		idnK	b4268	1.32187	0.112842		idnK	b4268	-0.0397288	0.980531			idnK	b4268	0.029595	0.980563		idnK	b4268	1.60393	0.0340011		idnK	b4268	0.0944186	0.930317			idnK	b4268
idnO	b4266	0.138565	0.940278		idnO	b4266	-1.64644	0.465616		idnO	b4266	0.832631	0.608319			idnO	b4266	-0.44753	0.779847		idnO	b4266	0.808215	0.639273		idnO	b4266	0.41559	0.864244			idnO	b4266	-0.709723	0.650448		idnO	b4266	-0.0489561	0.981664		idnO	b4266	1.90464	0.165647			idnO	b4266
idnR	b4264	2.15088	0.00374184		idnR	b4264	0.788715	0.418057		idnR	b4264	1.95512	0.00887465			idnR	b4264	1.46116	0.049826		idnR	b4264	0.933557	0.272042		idnR	b4264	0.7061	0.599959			idnR	b4264	2.03311	0.00235184		idnR	b4264	1.28373	0.0904584		idnR	b4264	1.74838	0.0268966			idnR	b4264
idnT	b4265	0.323997	0.704492		idnT	b4265	0.675534	0.388409		idnT	b4265	-0.703514	0.292371			idnT	b4265	0.0542238	0.950038		idnT	b4265	0.276691	0.764961		idnT	b4265	0.00175808	0.998201			idnT	b4265	-0.444357	0.537095		idnT	b4265	0.837243	0.224645		idnT	b4265	0.0266245	0.975234			idnT	b4265
ihfA	b1712	-1.3719	0.00654154		ihfA	b1712	-1.26199	0.0205048		ihfA	b1712	-1.12754	0.0317487			ihfA	b1712	-1.69005	0.000370467		ihfA	b1712	-0.410444	0.544532		ihfA	b1712	-0.251864	0.723109			ihfA	b1712	-1.09245	0.0359582		ihfA	b1712	-0.626047	0.335941		ihfA	b1712	-1.1526	0.026428			ihfA	b1712
ihfB	b0912	-1.27291	0.035802		ihfB	b0912	-0.242881	0.785216		ihfB	b0912	-0.0270509	0.979602			ihfB	b0912	-2.27628	2.68214e-05		ihfB	b0912	0.51557	0.498713		ihfB	b0912	-0.412146	0.595412			ihfB	b0912	-1.29815	0.0287069		ihfB	b0912	0.696938	0.353641		ihfB	b0912	0.165478	0.843166			ihfB	b0912
ileS	b0026	0.178662	0.726805		ileS	b0026	0.011332	0.988182		ileS	b0026	0.321615	0.48283			ileS	b0026	0.61383	0.103945		ileS	b0026	-0.141009	0.805167		ileS	b0026	0.171039	0.741768			ileS	b0026	0.284844	0.543941		ileS	b0026	-0.0385268	0.955096		ileS	b0026	0.231873	0.633365			ileS	b0026
ileT	b3852	2.18474	0.839333		ileT	b3852	26.5177	0.000169958		ileT	b3852	-0.884627	0.943385			ileT	b3852	3.18553	0.721246		ileT	b3852	15.3888	0.0579549		ileT	b3852	24.6515	0.000554873			ileT	b3852	2.77825	0.78228		ileT	b3852	17.2543	0.0266031		ileT	b3852	0.132986	0.991114			ileT	b3852
ileU	b3277	-5.27995	0.591314		ileU	b3277	12.3025	0.181312		ileU	b3277	-0.415377	0.977079			ileU	b3277	-2.87951	0.762202		ileU	b3277	1.90533	0.882643		ileU	b3277	9.7715	0.283396			ileU	b3277	4.36335	0.659544		ileU	b3277	9.07193	0.359523		ileU	b3277	0.441832	0.972618			ileU	b3277
ileV	b0202	-4.76964	0.549723		ileV	b0202	11.2296	0.122817		ileV	b0202	-0.87215	0.930998			ileV	b0202	-5.62103	0.424577		ileV	b0202	2.22135	0.825445		ileV	b0202	0.131004	0.991			ileV	b0202	4.85477	0.522188		ileV	b0202	9.10078	0.240242		ileV	b0202	-3.06353	0.720022			ileV	b0202
ileX	b3069	1.24062	0.474726		ileX	b3069	2.14024	0.187404		ileX	b3069	0.85897	0.647315			ileX	b3069	1.02022	0.512905		ileX	b3069	-0.386584	0.875356		ileX	b3069	-0.712281	0.826638			ileX	b3069	1.0897	0.498986		ileX	b3069	0.188642	0.939281		ileX	b3069	-0.169898	0.944904			ileX	b3069
ileY	b2652	0.51792	NA		ileY	b2652	2.69534	NA		ileY	b2652	2.5907	NA			ileY	b2652	-0.333462	NA		ileY	b2652	2.21547	NA		ileY	b2652	1.95924	NA			ileY	b2652	1.74979	NA		ileY	b2652	1.10392	NA		ileY	b2652	0.44183	NA			ileY	b2652
ilvA	b3772	-0.53434	0.375129		ilvA	b3772	0.27134	0.7184		ilvA	b3772	1.24225	0.0159863			ilvA	b3772	-0.64054	0.230432		ilvA	b3772	-0.619126	0.329476		ilvA	b3772	-0.0119665	0.991			ilvA	b3772	-0.792559	0.146142		ilvA	b3772	-0.118335	0.890451		ilvA	b3772	0.313203	0.643148			ilvA	b3772
ilvB	b3671	-1.4554	0.0448492		ilvB	b3671	0.130403	0.910415		ilvB	b3671	1.353	0.0646458			ilvB	b3671	-1.52233	0.0251166		ilvB	b3671	0.532214	0.57043		ilvB	b3671	1.65152	0.0258834			ilvB	b3671	-0.839161	0.290845		ilvB	b3671	-0.0931923	0.940068		ilvB	b3671	2.58324	8.02258e-05			ilvB	b3671
ilvC	b3774	-4.97329	3.55917e-14		ilvC	b3774	-2.31875	0.00149459		ilvC	b3774	0.343785	0.731469			ilvC	b3774	-4.97955	8.83076e-15		ilvC	b3774	-4.18421	6.79221e-10		ilvC	b3774	0.468406	0.635177			ilvC	b3774	-3.74703	1.00474e-08		ilvC	b3774	-0.174498	0.887149		ilvC	b3774	-0.788875	0.357009			ilvC	b3774
ilvD	b3771	0.0668559	0.934068		ilvD	b3771	0.876552	0.191938		ilvD	b3771	1.76803	0.00133124			ilvD	b3771	-0.270968	0.691653		ilvD	b3771	-0.161244	0.862506		ilvD	b3771	0.566324	0.434089			ilvD	b3771	-0.339961	0.640081		ilvD	b3771	0.313373	0.718316		ilvD	b3771	0.987777	0.101659			ilvD	b3771
ilvE	b3770	-0.584566	0.272604		ilvE	b3770	-0.25657	0.706554		ilvE	b3770	1.17417	0.0122213			ilvE	b3770	-0.875848	0.052706		ilvE	b3770	-1.13004	0.026293		ilvE	b3770	0.734912	0.210525			ilvE	b3770	-0.870208	0.0598744		ilvE	b3770	0.0798542	0.91722		ilvE	b3770	1.41405	0.00186709			ilvE	b3770
ilvH	b0078	-0.679919	0.564594		ilvH	b0078	-0.364211	0.802205		ilvH	b0078	-2.28219	0.0125259			ilvH	b0078	-1.87093	0.0457698		ilvH	b0078	1.06806	0.342515		ilvH	b0078	-0.622993	0.614351			ilvH	b0078	-0.809364	0.451202		ilvH	b0078	2.05223	0.0314855		ilvH	b0078	-0.749514	0.493797			ilvH	b0078
ilvI	b0077	0.287007	0.80482		ilvI	b0077	-1.29442	0.186609		ilvI	b0077	-1.31459	0.125681			ilvI	b0077	-0.352653	0.719696		ilvI	b0077	1.06671	0.261664		ilvI	b0077	0.0906292	0.946607			ilvI	b0077	0.528301	0.602964		ilvI	b0077	2.56366	0.00112316		ilvI	b0077	0.483762	0.637967			ilvI	b0077
ilvL	b3766	0.354784	0.791249		ilvL	b3766	-1.21168	0.305078		ilvL	b3766	-1.85167	0.0595705			ilvL	b3766	-0.0279354	0.986345		ilvL	b3766	1.06022	0.34648		ilvL	b3766	-0.861189	0.484558			ilvL	b3766	1.01861	0.336886		ilvL	b3766	-0.133496	0.934078		ilvL	b3766	1.06541	0.30891			ilvL	b3766
ilvM	b3769	-2.00545	0.0595472		ilvM	b3769	-0.613069	0.638255		ilvM	b3769	1.2816	0.200593			ilvM	b3769	-2.17694	0.0170785		ilvM	b3769	-1.52239	0.157574		ilvM	b3769	0.681277	0.632381			ilvM	b3769	-2.46996	0.00382702		ilvM	b3769	0.182153	0.89827		ilvM	b3769	1.24507	0.227152			ilvM	b3769
ilvN	b3670	-2.19308	0.041762		ilvN	b3670	1.1059	0.329974		ilvN	b3670	1.25252	0.218327			ilvN	b3670	-1.80903	0.0525815		ilvN	b3670	0.686268	0.575013		ilvN	b3670	0.844968	0.498329			ilvN	b3670	-0.741952	0.490364		ilvN	b3670	0.112194	0.944401		ilvN	b3670	2.24731	0.0128721			ilvN	b3670
ilvX	b4669	-4.01267	0.000548907		ilvX	b4669	-1.93947	0.155103		ilvX	b4669	0.410806	0.776567			ilvX	b4669	-3.94855	7.27255e-05		ilvX	b4669	-0.51299	0.7277		ilvX	b4669	0.283495	0.878406			ilvX	b4669	-4.5918	1.07124e-06		ilvX	b4669	-0.391468	0.80216		ilvX	b4669	1.91703	0.0687067			ilvX	b4669
ilvY	b3773	-0.978893	0.0533037		ilvY	b3773	-0.0645636	0.936664		ilvY	b3773	-0.0785037	0.915237			ilvY	b3773	-0.528705	0.276098		ilvY	b3773	-0.87459	0.118177		ilvY	b3773	-0.448065	0.53191			ilvY	b3773	-0.792121	0.0892008		ilvY	b3773	-0.146856	0.850006		ilvY	b3773	-0.461777	0.435299			ilvY	b3773
inaA	b2237	-1.06279	0.225145		inaA	b2237	-0.663401	0.502034		inaA	b2237	-0.416812	0.665671			inaA	b2237	-1.86419	0.0119209		inaA	b2237	0.556957	0.57032		inaA	b2237	0.45654	0.64645			inaA	b2237	-0.999237	0.222982		inaA	b2237	-0.769655	0.423824		inaA	b2237	-0.164561	0.879149			inaA	b2237
infA	b0884	0.141654	0.915732		infA	b0884	-0.442506	0.726036		infA	b0884	-0.77136	0.458413			infA	b0884	1.11962	0.222735		infA	b0884	-0.210137	0.882449		infA	b0884	-0.456943	0.703739			infA	b0884	1.049	0.289828		infA	b0884	-1.67987	0.0808418		infA	b0884	-0.149525	0.908792			infA	b0884
infB	b3168	0.375594	0.538514		infB	b3168	0.304685	0.669077		infB	b3168	0.881103	0.0891159			infB	b3168	1.0462	0.0272739		infB	b3168	0.680809	0.236891		infB	b3168	1.02755	0.0504145			infB	b3168	0.791532	0.129014		infB	b3168	-0.386396	0.576612		infB	b3168	0.641004	0.238162			infB	b3168
infC	b1718	-0.561821	0.356328		infC	b1718	-0.159765	0.847155		infC	b1718	-0.796792	0.158709			infC	b1718	0.0291458	0.971985		infC	b1718	0.136203	0.87374		infC	b1718	-0.930106	0.105159			infC	b1718	-0.343018	0.606866		infC	b1718	-1.50171	0.0043492		infC	b1718	-1.38231	0.00670709			infC	b1718
insA	b0022	-0.69242	0.549858		insA	b0022	-0.691145	0.369394		insA	b0022	0.0932356	0.913072			insA	b0022	0.0140988	0.990795		insA	b0022	-0.923857	0.166055		insA	b0022	-1.5101	0.13184			insA	b0022	-0.415115	0.619614		insA	b0022	-0.541821	0.448108		insA	b0022	-0.382082	0.612958			insA	b0022
insB1	b0021	0.0589414	0.951601		insB1	b0021	0.832411	0.259966		insB1	b0021	1.07287	0.0903276			insB1	b0021	0.0373791	0.971186		insB1	b0021	0.578942	0.458137		insB1	b0021	0.27946	0.7526			insB1	b0021	-0.305741	0.723787		insB1	b0021	0.463536	0.586516		insB1	b0021	-0.0820901	0.930317			insB1	b0021
insD1	b0361	0.355317	0.904839		insD1	b0361	-2.79342	NA		insD1	b0361	-0.573816	NA			insD1	b0361	-1.52949	0.552254		insD1	b0361	1.12347	NA		insD1	b0361	-2.2223	NA			insD1	b0361	-1.15448	0.628581		insD1	b0361	0.471654	NA		insD1	b0361	-0.56323	NA			insD1	b0361
insF1	b0299	1.30974	0.319129		insF1	b0299	1.44954	0.338717		insF1	b0299	2.45477	0.0326574			insF1	b0299	0.765873	0.544706		insF1	b0299	-1.03503	0.573646		insF1	b0299	-0.652739	0.827692			insF1	b0299	0.598123	0.658532		insF1	b0299	-0.226559	0.916434		insF1	b0299	1.48937	0.270945			insF1	b0299
insG	b4278	-0.775679	0.300689		insG	b4278	-0.582448	0.462835		insG	b4278	-1.23825	0.0310062			insG	b4278	-0.451068	0.498999		insG	b4278	-0.686302	0.345116		insG	b4278	-1.44317	0.0481779			insG	b4278	-1.02685	0.086692		insG	b4278	-0.376367	0.649937		insG	b4278	-1.02593	0.0937066			insG	b4278
insH1	b0259	1.31232	0.0461991		insH1	b0259	-0.177611	0.847155		insH1	b0259	-0.0349387	0.970025			insH1	b0259	1.31074	0.0243049		insH1	b0259	0.467437	0.506707		insH1	b0259	0.147029	0.886062			insH1	b0259	0.785481	0.222982		insH1	b0259	0.543868	0.430572		insH1	b0259	-0.243441	0.762708			insH1	b0259
insI1	b0256	-0.205073	0.88895		insI1	b0256	0.458463	0.711466		insI1	b0256	0.308052	0.772025			insI1	b0256	-0.147427	0.901477		insI1	b0256	0.094932	0.951188		insI1	b0256	-1.21836	0.379673			insI1	b0256	-0.393022	0.72515		insI1	b0256	0.903587	0.359523		insI1	b0256	-0.314529	0.778979			insI1	b0256
insJ	b3557	0.322615	0.846308		insJ	b3557	1.94143	0.148908		insJ	b3557	-0.0903709	0.962076			insJ	b3557	-0.645254	0.638439		insJ	b3557	2.2143	0.0718605		insJ	b3557	0.905729	0.612509			insJ	b3557	-0.708929	0.58933		insJ	b3557	1.42972	0.301988		insJ	b3557	0.208559	0.908894			insJ	b3557
insK	b3558	1.22992	0.491721		insK	b3558	0.0954953	0.970823		insK	b3558	0.105276	NA			insK	b3558	-1.5382	0.493561		insK	b3558	1.36372	0.348413		insK	b3558	0.596007	NA			insK	b3558	0.712907	0.665885		insK	b3558	0.368623	0.855011		insK	b3558	-1.06377	0.467394			insK	b3558
insL1	b0016	7.44356	0.552723		insL1	b0016	0.964644	NA		insL1	b0016	-0.415372	NA			insL1	b0016	1.05237	0.943378		insL1	b0016	0.50365	NA		insL1	b0016	1.95922	NA			insL1	b0016	1.16222	0.942539		insL1	b0016	-0.42261	NA		insL1	b0016	0.441826	NA			insL1	b0016
insM	b4561	2.39608	NA		insM	b4561	4.59477	NA		insM	b4561	3.21134	NA			insM	b4561	0.0613515	NA		insM	b4561	1.8852	NA		insM	b4561	0.561477	NA			insM	b4561	-0.233345	NA		insM	b4561	4.29307	NA		insM	b4561	0.307496	NA			insM	b4561
insN	b0255	-0.0614549	0.949976		insN	b0255	-0.264579	0.787595		insN	b0255	-1.00875	0.126621			insN	b0255	-0.0185931	0.987206		insN	b0255	0.661284	0.404727		insN	b0255	-0.758261	0.359068			insN	b0255	0.114046	0.901356		insN	b0255	-0.0654249	0.953723		insN	b0255	-1.02217	0.135232			insN	b0255
insO	b0257	0.679591	0.460915		insO	b0257	0.941938	0.245209		insO	b0257	0.915324	0.213212			insO	b0257	1.15933	0.0837196		insO	b0257	0.746705	0.354836		insO	b0257	0.71519	0.482912			insO	b0257	1.18573	0.0714177		insO	b0257	1.23592	0.0732463		insO	b0257	1.03845	0.16333			insO	b0257
insP	b4531	0.418621	0.699291		insP	b4531	0.299041	0.84003		insP	b4531	-0.338692	0.750116			insP	b4531	-2.08028	0.0431791		insP	b4531	2.0533	0.0132224		insP	b4531	1.01367	0.304686			insP	b4531	-0.620099	0.493437		insP	b4531	0.768389	0.47656		insP	b4531	-0.415568	0.705293			insP	b4531
insQ	b1432	1.20399	8.58345e-05		insQ	b1432	0.818865	0.0159127		insQ	b1432	0.577942	0.0948063			insQ	b1432	0.927667	0.00212547		insQ	b1432	-0.157528	0.751921		insQ	b1432	-0.267242	0.580225			insQ	b1432	0.324778	0.393823		insQ	b1432	-0.0177931	0.974956		insQ	b1432	0.42749	0.251393			insQ	b1432
insX	b4505	0.358444	0.788616		insX	b4505	1.14943	0.243153		insX	b4505	0.386384	0.704593			insX	b4505	0.718319	0.427443		insX	b4505	0.817257	0.421002		insX	b4505	1.28258	0.184604			insX	b4505	0.470843	0.637389		insX	b4505	1.05325	0.26065		insX	b4505	0.970632	0.262968			insX	b4505
intA	b2622	-0.339203	0.627629		intA	b2622	-0.741701	0.222792		intA	b2622	0.191889	0.783424			intA	b2622	-0.442577	0.436778		intA	b2622	-1.26666	0.0180793		intA	b2622	0.40771	0.565659			intA	b2622	-0.692492	0.195682		intA	b2622	-0.345993	0.611181		intA	b2622	-0.025824	0.974606			intA	b2622
intB	b4271	-0.608842	0.39094		intB	b4271	-0.359573	0.680008		intB	b4271	-0.664411	0.312328			intB	b4271	-1.72026	0.00244704		intB	b4271	0.387652	0.627565		intB	b4271	-0.561218	0.465149			intB	b4271	-1.00899	0.0896121		intB	b4271	-0.17464	0.855011		intB	b4271	-0.440433	0.540167			intB	b4271
intD	b0537	1.05878	0.0948218		intD	b0537	0.578229	0.429907		intD	b0537	0.481565	0.466813			intD	b0537	1.35722	0.0120237		intD	b0537	0.740666	0.26393		intD	b0537	-0.51177	0.549691			intD	b0537	1.22487	0.0270834		intD	b0537	0.753855	0.255917		intD	b0537	0.53439	0.423479			intD	b0537
intE	b1140	-0.725624	0.594524		intE	b1140	1.09564	0.318084		intE	b1140	0.204797	0.869692			intE	b1140	-1.02869	0.343157		intE	b1140	0.544273	0.65869		intE	b1140	-0.181897	0.91002			intE	b1140	0.140901	0.912004		intE	b1140	0.961208	0.375217		intE	b1140	0.176241	0.890999			intE	b1140
intF	b0281	-1.53155	0.0260726		intF	b0281	-0.204331	0.829011		intF	b0281	-0.886872	0.159715			intF	b0281	-1.24603	0.043407		intF	b0281	0.878343	0.20432		intF	b0281	-1.38531	0.0333168			intF	b0281	-1.13527	0.0675134		intF	b0281	0.25075	0.791155		intF	b0281	-1.77453	0.00192609			intF	b0281
intG	b1936	3.26227	0.302404		intG	b1936	1.5162	NA		intG	b1936	-0.31177	NA			intG	b1936	3.2906	0.221425		intG	b1936	2.14846	NA		intG	b1936	1.07856	NA			intG	b1936	3.98935	0.0984345		intG	b1936	1.18252	NA		intG	b1936	1.75894	NA			intG	b1936
intK	b1567	-0.0771305	0.979393		intK	b1567	3.40232	NA		intK	b1567	2.35675	NA			intK	b1567	-0.0779503	0.983861		intK	b1567	3.42612	NA		intK	b1567	0.47899	NA			intK	b1567	-0.00463919	0.998685		intK	b1567	2.99082	NA		intK	b1567	2.61435	NA			intK	b1567
intQ	b1579	1.17915	0.47572		intQ	b1579	1.882	0.255152		intQ	b1579	0.522904	0.73927			intQ	b1579	1.08592	0.438996		intQ	b1579	3.48993	0.00789393		intQ	b1579	0.849153	0.633621			intQ	b1579	1.00041	0.491941		intQ	b1579	2.44157	0.0837114		intQ	b1579	0.693864	0.65483			intQ	b1579
intR	b1345	-2.05785	0.0119754		intR	b1345	-1.1546	0.181562		intR	b1345	-1.56022	0.010396			intR	b1345	-2.00296	0.00323088		intR	b1345	0.725529	0.345813		intR	b1345	-0.765865	0.340101			intR	b1345	-2.35917	0.000159673		intR	b1345	0.108011	0.917522		intR	b1345	-1.13207	0.0835092			intR	b1345
intS	b2349	1.7666	0.0259206		intS	b2349	0.804788	0.490485		intS	b2349	0.202115	0.84673			intS	b2349	1.74676	0.0139671		intS	b2349	2.18191	0.00688447		intS	b2349	1.40686	0.093685			intS	b2349	1.71696	0.0145456		intS	b2349	1.89083	0.0174134		intS	b2349	0.186909	0.863719			intS	b2349
intZ	b2442	0.398322	0.571345		intZ	b2442	0.0971247	0.909689		intZ	b2442	0.427751	0.504175			intZ	b2442	0.724068	0.174637		intZ	b2442	-1.20578	0.0360354		intZ	b2442	0.19272	0.837271			intZ	b2442	0.581304	0.31079		intZ	b2442	-0.723507	0.233707		intZ	b2442	0.616059	0.311416			intZ	b2442
iraD	b4326	-0.470877	0.695494		iraD	b4326	-1.61553	0.0658056		iraD	b4326	-0.345024	0.730387			iraD	b4326	-1.08752	0.233446		iraD	b4326	-1.39259	0.0840148		iraD	b4326	-0.0250835	0.988419			iraD	b4326	-0.38747	0.685613		iraD	b4326	-1.93199	0.00831921		iraD	b4326	-0.519753	0.606801			iraD	b4326
iraM	b1160	-1.19156	NA		iraM	b1160	-0.521287	NA		iraM	b1160	-0.603666	NA			iraM	b1160	-2.04295	NA		iraM	b1160	-1.03052	NA		iraM	b1160	0.311991	NA			iraM	b1160	-1.92617	NA		iraM	b1160	-0.494444	NA		iraM	b1160	1.05443	NA			iraM	b1160
iraP	b0382	-1.30946	0.0559736		iraP	b0382	-0.392878	0.675834		iraP	b0382	0.0858998	0.932934			iraP	b0382	-2.82907	5.46032e-06		iraP	b0382	-0.0786531	0.945067		iraP	b0382	-1.83922	0.0180784			iraP	b0382	-1.51279	0.0150551		iraP	b0382	0.339132	0.725659		iraP	b0382	-0.75174	0.303021			iraP	b0382
iscA	b2528	0.137554	0.85977		iscA	b2528	-0.613711	0.353064		iscA	b2528	-0.717608	0.216179			iscA	b2528	1.03463	0.0415417		iscA	b2528	0.597957	0.347755		iscA	b2528	0.836274	0.15662			iscA	b2528	0.779583	0.163824		iscA	b2528	0.707099	0.267621		iscA	b2528	0.776192	0.169228			iscA	b2528
iscR	b2531	2.36969	1.45221e-05		iscR	b2531	2.55391	4.55344e-06		iscR	b2531	2.76032	3.63083e-07			iscR	b2531	2.24305	2.72299e-05		iscR	b2531	2.52189	7.06788e-06		iscR	b2531	2.56805	4.5051e-06			iscR	b2531	2.09629	0.000139873		iscR	b2531	3.0531	1.68521e-08		iscR	b2531	3.14558	2.70872e-09			iscR	b2531
iscS	b2530	1.65718	0.00231167		iscS	b2530	1.20338	0.0509487		iscS	b2530	1.60121	0.00394602			iscS	b2530	2.19305	1.73684e-05		iscS	b2530	1.64308	0.00460357		iscS	b2530	2.46481	4.62467e-06			iscS	b2530	1.6056	0.00307164		iscS	b2530	1.99359	0.000307743		iscS	b2530	2.50716	1.2928e-06			iscS	b2530
iscU	b2529	0.0654447	0.92853		iscU	b2529	-0.534072	0.412294		iscU	b2529	-0.654114	0.251346			iscU	b2529	0.254868	0.676186		iscU	b2529	0.181503	0.813071		iscU	b2529	0.526802	0.391217			iscU	b2529	-0.206977	0.765643		iscU	b2529	0.464026	0.494939		iscU	b2529	1.00539	0.0505731			iscU	b2529
iscX	b2524	0.183098	0.836524		iscX	b2524	0.772518	0.284676		iscX	b2524	0.902879	0.161029			iscX	b2524	1.23735	0.027522		iscX	b2524	0.658586	0.360554		iscX	b2524	1.6493	0.00855433			iscX	b2524	0.814536	0.196386		iscX	b2524	-0.538215	0.496656		iscX	b2524	1.29693	0.0317157			iscX	b2524
ispA	b0421	1.54241	0.0113601		ispA	b0421	1.0974	0.115458		ispA	b0421	-0.464116	0.53571			ispA	b0421	2.06102	0.000231587		ispA	b0421	1.41773	0.028843		ispA	b0421	0.0101771	0.991732			ispA	b0421	1.80883	0.00186105		ispA	b0421	0.492545	0.568296		ispA	b0421	-0.631749	0.371471			ispA	b0421
ispB	b3187	0.665709	0.036447		ispB	b3187	0.104483	0.827011		ispB	b3187	0.350484	0.318815			ispB	b3187	0.741107	0.0110409		ispB	b3187	0.202508	0.632741		ispB	b3187	0.551683	0.118418			ispB	b3187	0.418332	0.209201		ispB	b3187	0.510727	0.138889		ispB	b3187	0.698107	0.0229889			ispB	b3187
ispD	b2747	0.422059	0.5324		ispD	b2747	0.112797	0.894955		ispD	b2747	0.0534364	0.950098			ispD	b2747	0.359219	0.545601		ispD	b2747	0.427715	0.51439		ispD	b2747	-0.00822175	0.992161			ispD	b2747	0.627891	0.258101		ispD	b2747	-0.513435	0.43907		ispD	b2747	-0.309969	0.650753			ispD	b2747
ispE	b1208	0.291252	0.741179		ispE	b1208	0.392139	0.676935		ispE	b1208	0.69191	0.358677			ispE	b1208	-0.0905101	0.920926		ispE	b1208	0.581269	0.480901		ispE	b1208	1.22118	0.0849614			ispE	b1208	0.0917497	0.926556		ispE	b1208	-0.345166	0.728887		ispE	b1208	0.526082	0.505185			ispE	b1208
ispF	b2746	1.23927	0.0765289		ispF	b2746	0.614941	0.496004		ispF	b2746	0.266919	0.780544			ispF	b2746	1.4723	0.0185348		ispF	b2746	0.705967	0.406228		ispF	b2746	0.865498	0.314559			ispF	b2746	1.11388	0.099561		ispF	b2746	-0.396988	0.695165		ispF	b2746	0.231396	0.813459			ispF	b2746
ispG	b2515	0.50854	0.441147		ispG	b2515	0.163723	0.849918		ispG	b2515	-0.0963727	0.911049			ispG	b2515	0.897668	0.101175		ispG	b2515	0.56863	0.409672		ispG	b2515	-0.077453	0.932188			ispG	b2515	0.692581	0.258175		ispG	b2515	-0.303878	0.717543		ispG	b2515	-0.608954	0.332529			ispG	b2515
ispH	b0029	1.50685	0.00534548		ispH	b0029	0.182621	0.834314		ispH	b0029	-0.335458	0.636536			ispH	b0029	1.85549	0.000239435		ispH	b0029	0.942925	0.131066		ispH	b0029	-0.257426	0.737288			ispH	b0029	1.62261	0.0019934		ispH	b0029	-0.0396214	0.968389		ispH	b0029	-0.628596	0.314653			ispH	b0029
ispU	b0174	0.148247	0.885808		ispU	b0174	1.16761	0.145325		ispU	b0174	1.14059	0.122688			ispU	b0174	-0.379254	0.644954		ispU	b0174	1.62686	0.0255709		ispU	b0174	1.3662	0.0696383			ispU	b0174	-0.0265097	0.982587		ispU	b0174	0.496098	0.618146		ispU	b0174	1.3746	0.0516452			ispU	b0174
isrC	b4435	-1.48341	NA		isrC	b4435	0.178061	NA		isrC	b4435	0.171864	NA			isrC	b4435	-2.33481	NA		isrC	b4435	-1.14446	NA		isrC	b4435	-1.70588	NA			isrC	b4435	-0.397737	NA		isrC	b4435	-0.151007	NA		isrC	b4435	-0.365218	NA			isrC	b4435
istR	b4616	-0.481482	0.883596		istR	b4616	2.68344	NA		istR	b4616	-2.1412	NA			istR	b4616	-2.69187	0.271087		istR	b4616	2.48653	NA		istR	b4616	-1.80614	NA			istR	b4616	-3.88365	0.110943		istR	b4616	0.889482	NA		istR	b4616	-3.45548	NA			istR	b4616
ivbL	b3672	3.74493	4.19518e-06		ivbL	b3672	2.5477	0.00474624		ivbL	b3672	3.66607	1.07641e-05			ivbL	b3672	2.7458	0.000803876		ivbL	b3672	2.69142	0.00279961		ivbL	b3672	2.93543	0.00090623			ivbL	b3672	2.96132	0.000377816		ivbL	b3672	-0.333748	0.819722		ivbL	b3672	3.17577	0.000141727			ivbL	b3672
ivy	b0220	-1.55172	0.00607097		ivy	b0220	-1.02958	0.114271		ivy	b0220	-2.15524	5.93962e-05			ivy	b0220	-1.74923	0.000990553		ivy	b0220	-0.302737	0.711721		ivy	b0220	-1.99925	0.000492403			ivy	b0220	-0.916907	0.127733		ivy	b0220	-0.760913	0.276494		ivy	b0220	-1.7367	0.00145302			ivy	b0220
jayE	b1152	-1.07105	0.526735		jayE	b1152	2.5099	0.0217778		jayE	b1152	-0.214128	0.877457			jayE	b1152	-0.820436	0.520609		jayE	b1152	1.67921	0.165942		jayE	b1152	0.759784	0.575305			jayE	b1152	0.299866	0.811477		jayE	b1152	1.68204	0.151789		jayE	b1152	-0.682769	0.606801			jayE	b1152
katE	b1732	-0.715036	0.333784		katE	b1732	0.199945	0.843017		katE	b1732	0.124321	0.900892			katE	b1732	-0.386742	0.602874		katE	b1732	-0.502748	0.546187		katE	b1732	0.382502	0.654885			katE	b1732	-0.440232	0.587513		katE	b1732	0.782064	0.328282		katE	b1732	0.1651	0.857795			katE	b1732
katG	b3942	-0.300808	0.6542		katG	b3942	-0.813638	0.188641		katG	b3942	-0.550493	0.363035			katG	b3942	-0.49308	0.374418		katG	b3942	-0.0976964	0.911523		katG	b3942	-0.305505	0.677179			katG	b3942	-0.489204	0.420301		katG	b3942	0.633879	0.322677		katG	b3942	0.249067	0.718162			katG	b3942
kbaY	b3137	2.35632	0.208059		kbaY	b3137	0.0912771	0.973302		kbaY	b3137	-0.759409	NA			kbaY	b3137	0.408313	0.867828		kbaY	b3137	-1.57218	0.441755		kbaY	b3137	1.29014	NA			kbaY	b3137	2.63503	0.102019		kbaY	b3137	-1.88654	0.349082		kbaY	b3137	-1.22304	0.527881			kbaY	b3137
kbaZ	b3132	0.48672	0.628852		kbaZ	b3132	0.62626	0.560707		kbaZ	b3132	1.28723	0.126502			kbaZ	b3132	-0.0772169	0.943635		kbaZ	b3132	-0.0679827	0.96486		kbaZ	b3132	1.72249	0.0728628			kbaZ	b3132	0.459717	0.605646		kbaZ	b3132	0.782763	0.40689		kbaZ	b3132	0.894613	0.353358			kbaZ	b3132
kbl	b3617	-0.502815	0.265419		kbl	b3617	-0.801899	0.0710522		kbl	b3617	-0.494743	0.262431			kbl	b3617	-0.89388	0.0173929		kbl	b3617	-0.459434	0.34422		kbl	b3617	-0.0734073	0.907262			kbl	b3617	-0.400221	0.377976		kbl	b3617	-0.619982	0.174688		kbl	b3617	-0.445918	0.318509			kbl	b3617
kch	b1250	0.373108	0.594524		kch	b1250	0.199985	0.782007		kch	b1250	0.785713	0.115403			kch	b1250	-0.309224	0.631739		kch	b1250	0.472111	0.432537		kch	b1250	0.185033	0.820427			kch	b1250	0.587862	0.281515		kch	b1250	0.134733	0.86032		kch	b1250	0.506647	0.369238			kch	b1250
kdgK	b3526	-0.0631459	0.936347		kdgK	b3526	0.318152	0.693535		kdgK	b3526	0.396362	0.568164			kdgK	b3526	-0.469644	0.435788		kdgK	b3526	0.300169	0.706277		kdgK	b3526	0.498997	0.50895			kdgK	b3526	-0.407509	0.538148		kdgK	b3526	0.200981	0.823264		kdgK	b3526	0.868852	0.150993			kdgK	b3526
kdgR	b1827	-2.12154	0.000320731		kdgR	b1827	-0.968544	0.188641		kdgR	b1827	-0.998204	0.125971			kdgR	b1827	-1.70407	0.00216904		kdgR	b1827	0.161586	0.867455		kdgR	b1827	-0.162207	0.868507			kdgR	b1827	-1.48327	0.00923192		kdgR	b1827	-0.010195	0.99235		kdgR	b1827	0.531405	0.461043			kdgR	b1827
kdgT	b3909	-0.758121	0.504602		kdgT	b3909	-0.398891	0.735946		kdgT	b3909	-0.763887	0.398307			kdgT	b3909	-0.989353	0.276569		kdgT	b3909	-1.34185	0.156841		kdgT	b3909	-0.214257	0.870023			kdgT	b3909	-0.283801	0.786629		kdgT	b3909	-0.372712	0.75624		kdgT	b3909	-0.244915	0.823191			kdgT	b3909
kdpA	b0698	-0.0374597	0.985438		kdpA	b0698	-3.13877	0.104474		kdpA	b0698	-0.236092	0.932603			kdpA	b0698	0.722191	0.731452		kdpA	b0698	1.89368	0.363307		kdpA	b0698	4.92444	0.00415353			kdpA	b0698	0.057643	0.985399		kdpA	b0698	-1.45573	0.532964		kdpA	b0698	-1.68762	0.419875			kdpA	b0698
kdpB	b0697	-0.0500677	0.979159		kdpB	b0697	-1.90466	0.332041		kdpB	b0697	0.255703	0.916845			kdpB	b0697	0.770557	0.684641		kdpB	b0697	1.87899	0.317371		kdpB	b0697	4.59795	0.00348276			kdpB	b0697	0.126282	0.959664		kdpB	b0697	-0.470777	0.855644		kdpB	b0697	0.0722282	0.975234			kdpB	b0697
kdpC	b0696	0.129261	0.922142		kdpC	b0696	-0.175496	0.907879		kdpC	b0696	-0.16239	0.909878			kdpC	b0696	-0.366609	0.747428		kdpC	b0696	1.02199	0.353993		kdpC	b0696	1.41423	0.167878			kdpC	b0696	-0.26317	0.836482		kdpC	b0696	-0.0861333	0.957824		kdpC	b0696	-0.393413	0.751089			kdpC	b0696
kdpD	b0695	-0.122287	0.896274		kdpD	b0695	-0.515433	0.544527		kdpD	b0695	-0.883552	0.198871			kdpD	b0695	-0.102765	0.902412		kdpD	b0695	0.727475	0.336926		kdpD	b0695	1.30825	0.0490875			kdpD	b0695	-0.396147	0.619614		kdpD	b0695	-0.176269	0.864465		kdpD	b0695	-1.18933	0.066858			kdpD	b0695
kdpE	b0694	0.997508	0.22435		kdpE	b0694	0.627763	0.530718		kdpE	b0694	-0.0546141	0.962551			kdpE	b0694	0.195256	0.836599		kdpE	b0694	0.964407	0.26894		kdpE	b0694	1.36245	0.0902571			kdpE	b0694	0.469488	0.602329		kdpE	b0694	0.750494	0.423943		kdpE	b0694	-0.567577	0.54472			kdpE	b0694
kdpF	b4513	-1.68579	0.798831		kdpF	b4513	-3.97115	0.504679		kdpF	b4513	-2.63598	0.670732			kdpF	b4513	-2.53719	0.642826		kdpF	b4513	2.82027	0.621321		kdpF	b4513	6.30681	0.209429			kdpF	b4513	-0.477883	0.944928		kdpF	b4513	-1.12199	0.871049		kdpF	b4513	0.328981	0.964811			kdpF	b4513
kdsA	b1215	0.775861	0.115987		kdsA	b1215	-0.24588	0.713679		kdsA	b1215	-0.552002	0.290945			kdsA	b1215	1.74954	2.18416e-05		kdsA	b1215	0.421683	0.473299		kdsA	b1215	-0.187927	0.773202			kdsA	b1215	1.14699	0.00998791		kdsA	b1215	0.126981	0.865982		kdsA	b1215	-0.561721	0.275439			kdsA	b1215
kdsB	b0918	0.470236	0.320064		kdsB	b0918	0.164856	0.782007		kdsB	b0918	1.03648	0.0101742			kdsB	b0918	1.00128	0.00670946		kdsB	b0918	-0.453277	0.364055		kdsB	b0918	1.27338	0.00340365			kdsB	b0918	0.741306	0.0617878		kdsB	b0918	-0.0243738	0.971845		kdsB	b0918	1.00629	0.0139467			kdsB	b0918
kdsC	b3198	-0.932415	0.0215634		kdsC	b3198	-0.555709	0.22287		kdsC	b3198	-1.01328	0.00538568			kdsC	b3198	-0.955084	0.00965424		kdsC	b3198	-0.170802	0.764961		kdsC	b3198	-0.947043	0.0205141			kdsC	b3198	-0.586434	0.143302		kdsC	b3198	-0.483749	0.294976		kdsC	b3198	-0.871817	0.0198618			kdsC	b3198
kdsD	b3197	0.142224	0.793973		kdsD	b3197	-0.0139458	0.984389		kdsD	b3197	0.213582	0.647315			kdsD	b3197	0.108948	0.817365		kdsD	b3197	0.478958	0.26997		kdsD	b3197	0.907875	0.0182152			kdsD	b3197	0.121692	0.808614		kdsD	b3197	0.428425	0.345856		kdsD	b3197	0.180251	0.710518			kdsD	b3197
kduD	b2842	-0.745283	0.42972		kduD	b2842	-2.07141	0.0402725		kduD	b2842	-0.934646	0.201502			kduD	b2842	-1.2356	0.0989788		kduD	b2842	-1.18311	0.150403		kduD	b2842	-0.813609	0.446063			kduD	b2842	-0.28228	0.745155		kduD	b2842	-0.244595	0.817585		kduD	b2842	-0.031577	0.975234			kduD	b2842
kduI	b2843	-0.307496	0.789141		kduI	b2843	0.56021	0.619668		kduI	b2843	0.0992118	0.927164			kduI	b2843	-3.78073	0.00431257		kduI	b2843	0.919642	0.309977		kduI	b2843	0.0615547	0.970786			kduI	b2843	-1.20541	0.107717		kduI	b2843	1.33367	0.093827		kduI	b2843	0.658556	0.42853			kduI	b2843
kefB	b3350	0.184812	0.809435		kefB	b3350	0.0881371	0.920047		kefB	b3350	1.14912	0.0335426			kefB	b3350	-0.127517	0.853332		kefB	b3350	-0.386374	0.593409		kefB	b3350	0.389183	0.604822			kefB	b3350	-0.169214	0.815494		kefB	b3350	0.284466	0.723228		kefB	b3350	1.09967	0.0445764			kefB	b3350
kefC	b0047	0.902986	0.00951172		kefC	b0047	-0.344065	0.52083		kefC	b0047	-0.803038	0.0351228			kefC	b0047	0.587146	0.0901691		kefC	b0047	-0.754647	0.0831824		kefC	b0047	-0.51832	0.339654			kefC	b0047	1.04863	0.00099707		kefC	b0047	-0.159306	0.786728		kefC	b0047	-0.90713	0.0235777			kefC	b0047
kefF	b0046	0.768686	0.451534		kefF	b0046	0.0911143	0.954567		kefF	b0046	-0.378395	0.727332			kefF	b0046	0.0176088	0.990795		kefF	b0046	-0.333246	0.803608		kefF	b0046	-0.101893	0.945697			kefF	b0046	0.668648	0.491829		kefF	b0046	0.707161	0.525952		kefF	b0046	-1.21415	0.200872			kefF	b0046
[truncated: 3,013 more rows]
[truncated: 10 more columns]

## Sheet: Filtered - w. H. alvei
Differential expression analysis of E. coli during growth with H. alvei versus growth alone: List of genes differentially expressed at day1, day2 or day3 associated with an adjusted p-value lower than 1%
Day1					Day2					Day3
[truncated: 683 more rows]

## Sheet: Filtered - w. G. candidum
Differential expression analysis of E. coli during growth with G. candidum versus growth alone: List of genes differentially expressed at day1, day2 or day3 associated with an adjusted p-value lower than 1%
[truncated: 979 more rows]

[truncated: 4 more sheets: Filtered - w. P. camemberti, Filtered - w community, Regulations in pairwises, Regulations pairwise and com]
