# Supplementary figures and images for: Changes in the genetic requirements for microbial interactions with increasing community complexity
Source: eLife journal article supplement (doi:10.7554/elife.37072), 2018-09-13

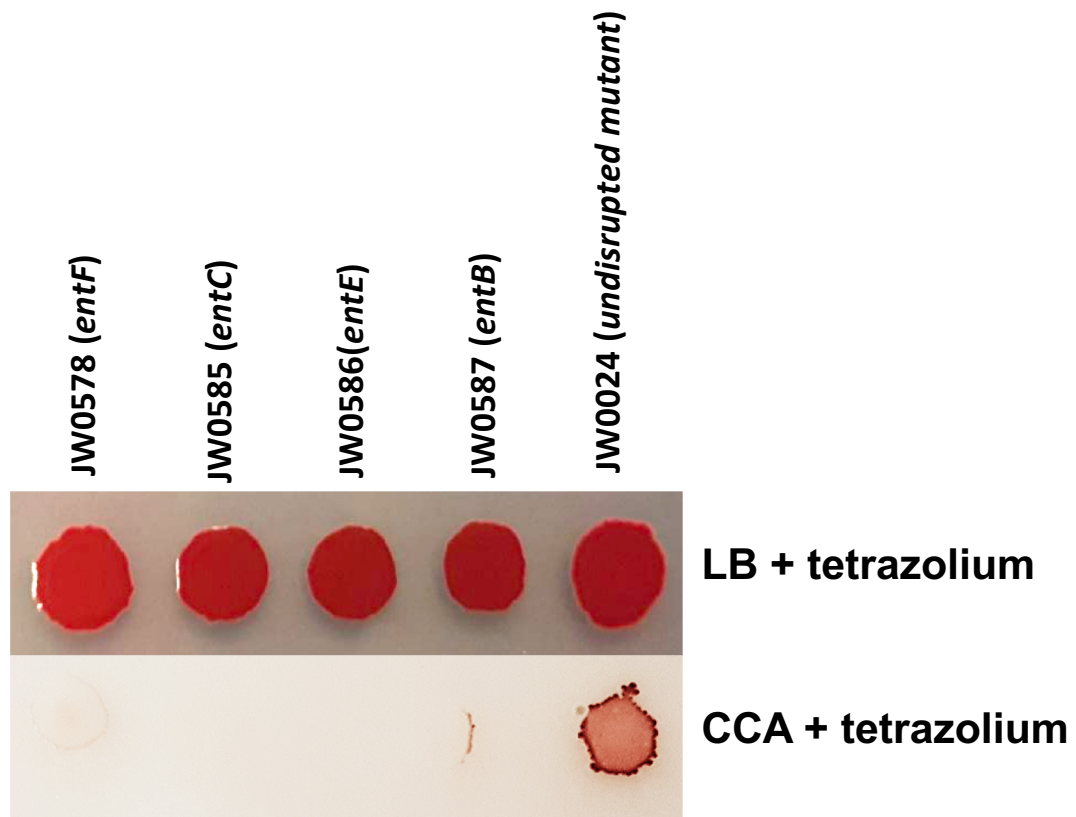

Supplement: supp [file elife-37072-supp-v1.zip]

**A**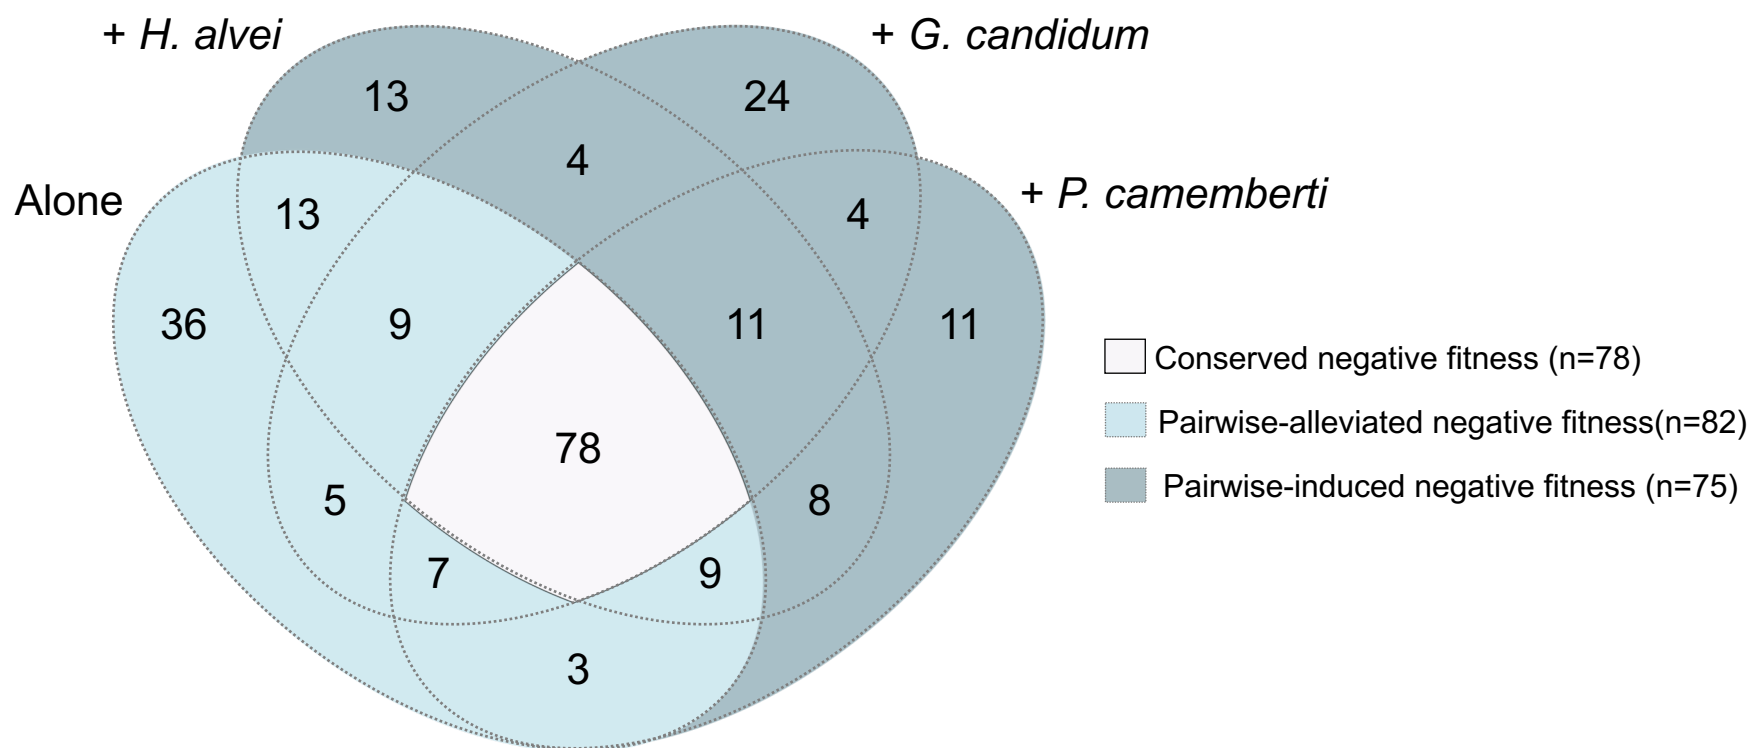**B**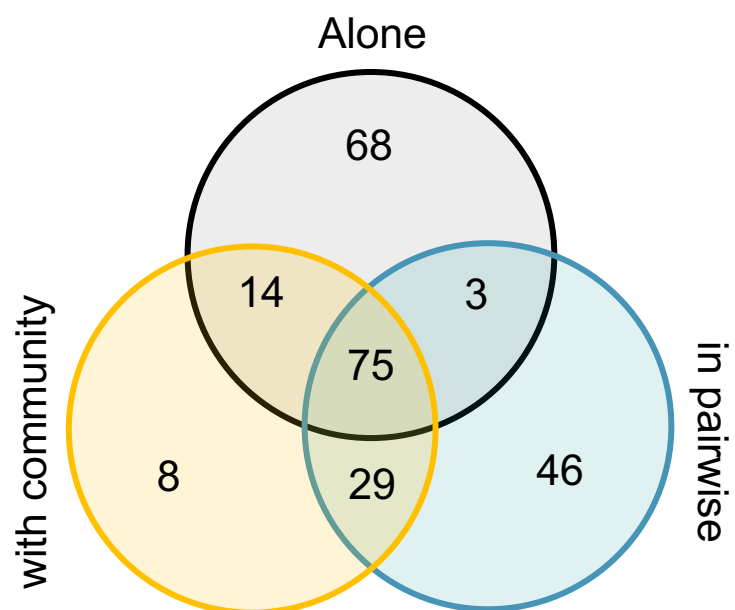

Supplement: supp [file elife-37072-supp-v1.zip]

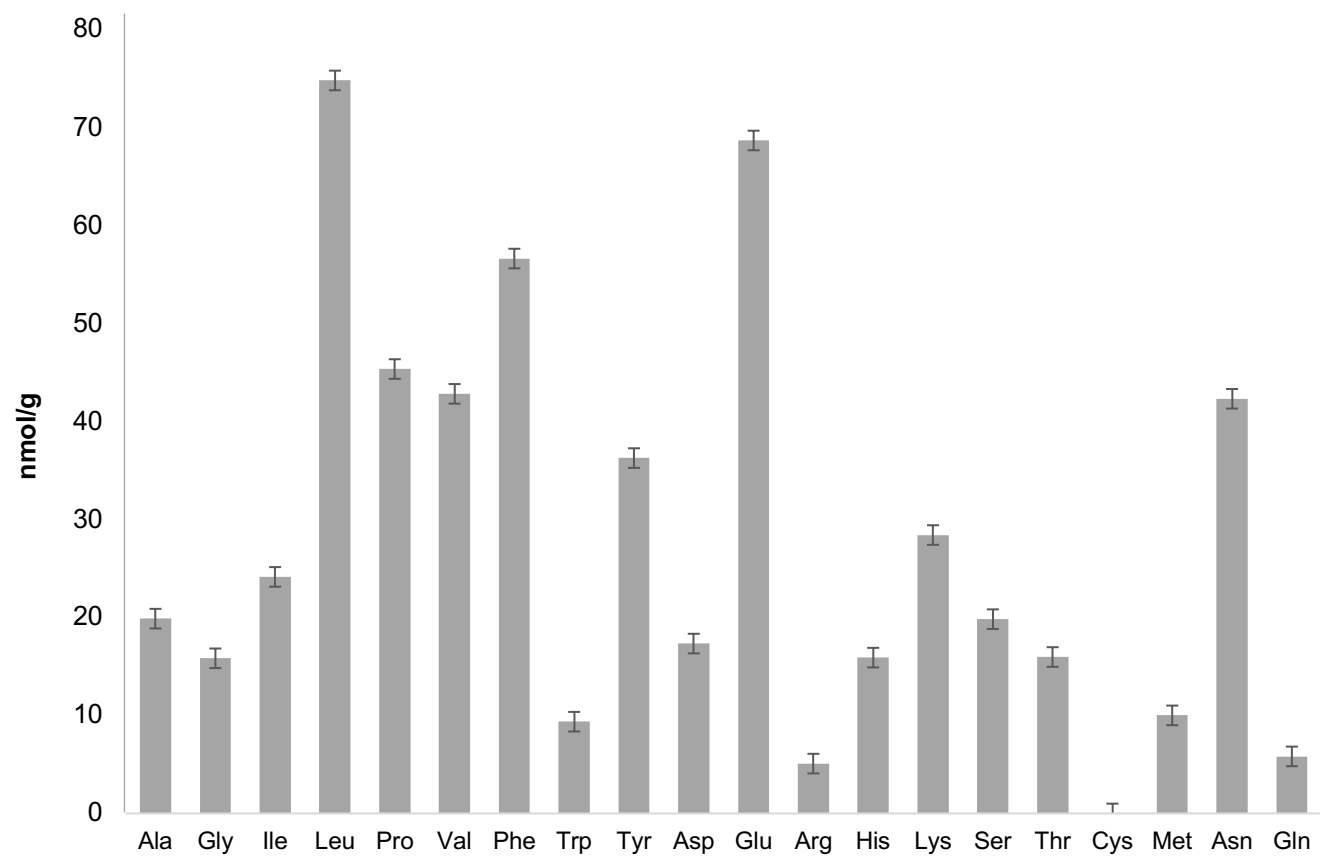

Supplement: supp [file elife-37072-supp-v1.zip]

**A.**

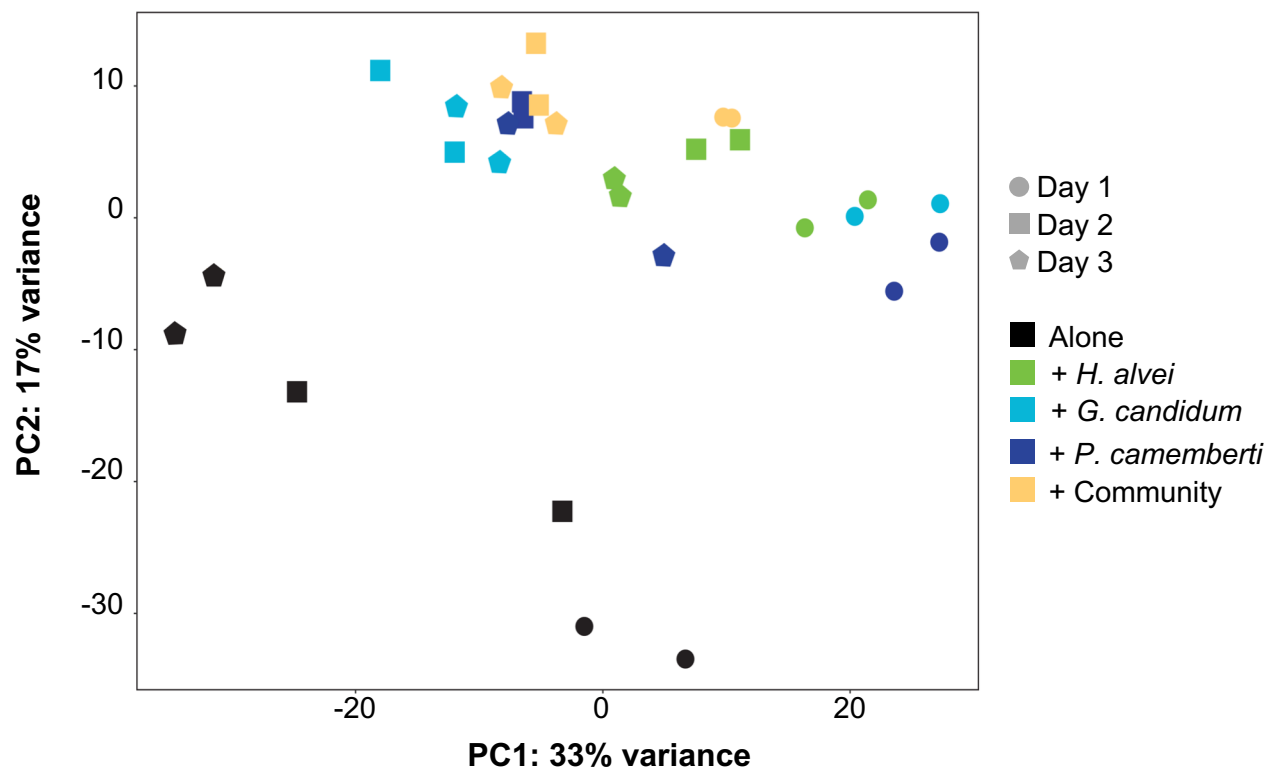

**B.**

Upregulation in pairwise

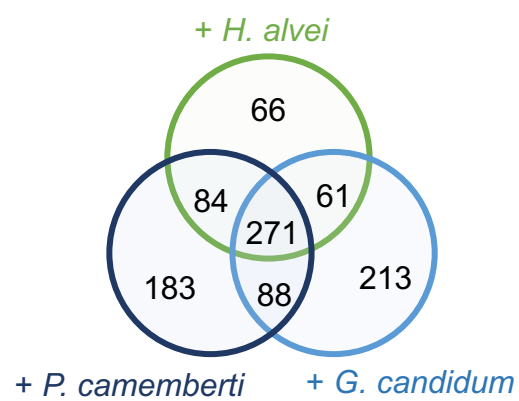

Downregulation in pairwise

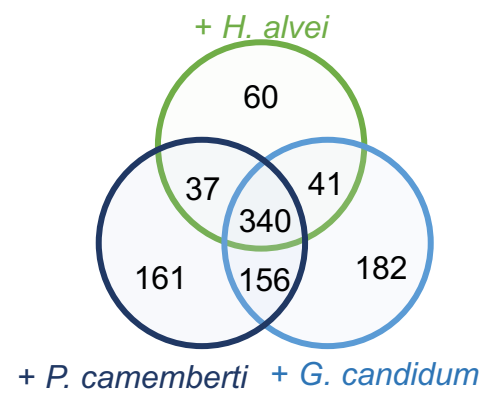

Supplement: supp [file elife-37072-supp-v1.zip]

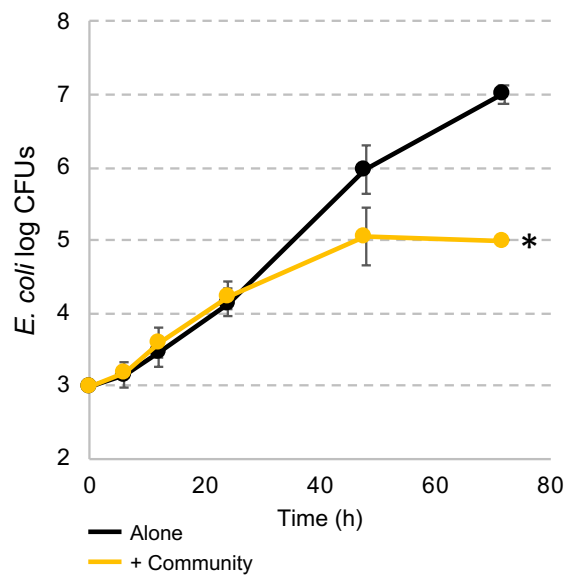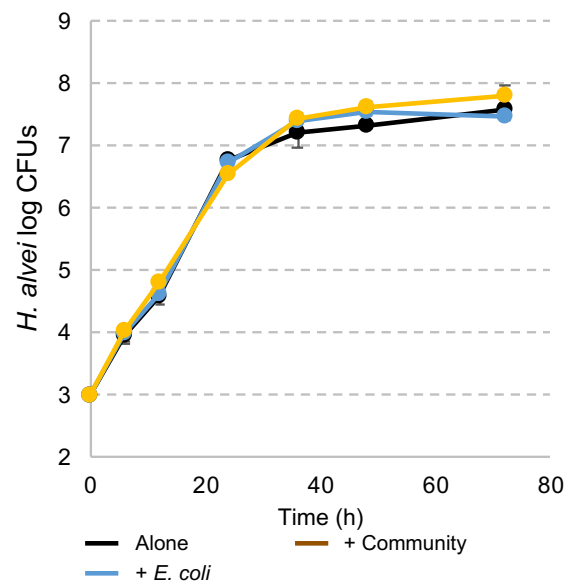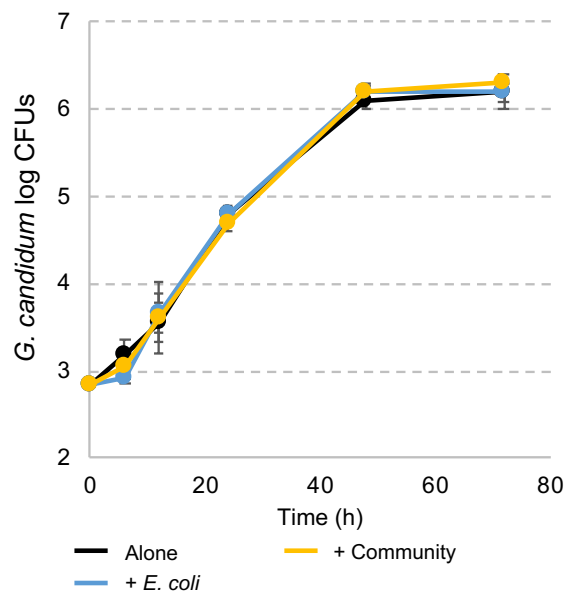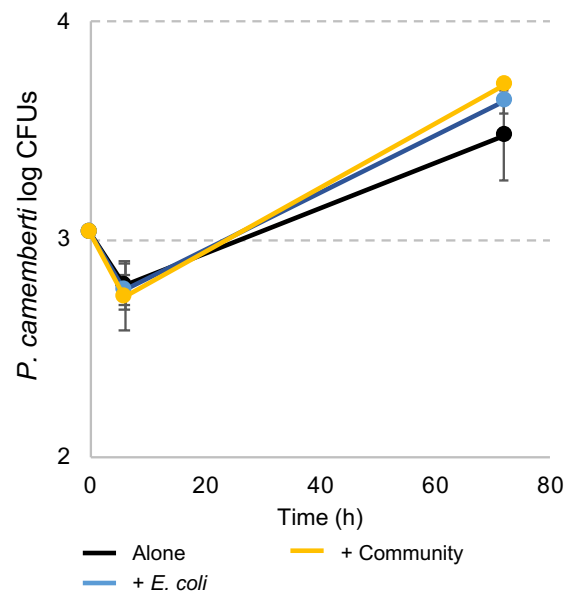

Supplement: supp [file elife-37072-supp-v1.zip › elife_poa_e37072_Figure_2_figure_supplement_1.pdf]
